# Supplementary material for: Predictors for inpatient mortality during the first wave of the SARS-CoV-2 pandemic: A retrospective analysis
Source: PubMed Central journal article supplement (PMC8109786; doi:10.1371/journal.pone.0251262), 2021-05-10
Supplement: pone.0251262.s002.pdf [file pone.0251262.s002.pdf]

```
library(readxl)
library(dplyr)
```

```
##
## Attaching package: 'dplyr'

## The following objects are masked from 'package:stats':
##
##   filter, lag

## The following objects are masked from 'package:base':
##
##   intersect, setdiff, setequal, union
```

```
library(generalhoslem)
```

```
## Loading required package: reshape

##
## Attaching package: 'reshape'

## The following object is masked from 'package:dplyr':
##
##   rename

## Loading required package: MASS

##
## Attaching package: 'MASS'

## The following object is masked from 'package:dplyr':
##
##   select
```

```
library(MatchIt)
library(plyr)
```

```
## -----

## You have loaded plyr after dplyr - this is likely to cause problems.
## If you need functions from both plyr and dplyr, please load plyr first, then dplyr:
## library(plyr); library(dplyr)

## -----

##
## Attaching package: 'plyr'
```

```
## The following objects are masked from 'package:reshape':  
##  
##   rename, round_any
```

```
## The following objects are masked from 'package:dplyr':  
##  
##   arrange, count, desc, failwith, id, mutate, rename, summarise,  
##   summarize
```

```
library(lubridate)
```

```
##  
## Attaching package: 'lubridate'
```

```
## The following object is masked from 'package:reshape':  
##  
##   stamp
```

```
## The following objects are masked from 'package:base':  
##  
##   date, intersect, setdiff, union
```

```
new.data = read_xlsx("~/Documents/Medical School/Research/Logistic Regression/COVID_DEIDENT_11-13.xlsx")
```

```
## New names:  
## * 'Please specify:' -> 'Please specify:...10'  
## * 'Complete?' -> 'Complete?...11'  
## * 'Complete?' -> 'Complete?...46'  
## * 'Please specify:' -> 'Please specify:...62'  
## * 'Please specify: (choice=Other)' -> 'Please specify: (choice=Other)...67'  
## * ...
```

```
# second.data$plasma
```

```
first.visit.data.new = new.data %>%  
  filter('Event Name' == "Admission 1 (Index)") %>% # select just patient's first admission  
  filter('Age at Admission' >= 18)
```

```
second.data = read_csv("~/Documents/Medical School/Research/Logistic Regression/CaseSeriesCOVID19_Update")
```

```
second.data = second.data %>%  
  filter('Event.Name' == "Admission 1 (Index)")
```

```
second.data$'REDCap Record ID' = second.data$REDCap.Record.ID  
second.data$REDCap.Record.ID = NULL  
second.data$'Event Name' = second.data$Event.Name  
second.data$Event.Name = NULL
```

```
# necessary variables from second data
```

```
second.data.subset = second.data %>%  
  dplyr::select('REDCap Record ID', 'Event Name', Date.of.plasma.administration)
```

```
second.data.subset$Date.of.plasma.administration = as.Date(second.data.subset$Date.of.plasma.administra

# merge two data sets
merged.data = merge(first.visit.data.new, second.data.subset, all = T)
```

Steroid and anticoagulation data were omitted because there was high variability in what each patient received. Many patients were on more than one medication and received different doses.

```
date.data = merged.data %>%
  dplyr::select('Date of Birth:', 'Admission Date:', 'Discharge Date:', 'Date of intubation:', 'Date of

date.data[] = lapply(date.data, as.Date)
date.data$'REDCap Record ID' = merged.data$'REDCap Record ID'
date.data$'Event Name' = merged.data$'Event Name'
date.data$time.until.plasma = date.data$Date.of.plasma.administration - date.data$'Admission Date:'

date.data.month = date.data
date.data.month$month = month(date.data.month$Date.of.plasma.administration) # plasma from april 9 to m

median(date.data$time.until.plasma, na.rm = T)
```

```
## Time difference of 5 days
```

```
median(date.data.month$time.until.plasma[date.data.month$month == 4], na.rm = T)
```

```
## Time difference of 6 days
```

```
median(date.data.month$time.until.plasma[date.data.month$month == 5], na.rm = T)
```

```
## Time difference of 2 days
```

```
numerical.data = merged.data %>%
  dplyr::select('Age at Admission', 'Median_Income', 'Per_Capita', 'Percent_Higher_Income', 'Length_of

numerical.data[] = lapply(numerical.data, as.numeric)
```

```
## Warning in lapply(numerical.data, as.numeric): NAs introduced by coercion
```

```
## Warning in lapply(numerical.data, as.numeric): NAs introduced by coercion
```

```
## Warning in lapply(numerical.data, as.numeric): NAs introduced by coercion
```

```
numerical.data$'REDCap Record ID' = merged.data$'REDCap Record ID'
numerical.data$'Event Name' = merged.data$'Event Name'
```

```
categorical.data = merged.data %>%
  dplyr::select('Patient Sex:', 'Insurance Class', 'Race:', 'Ethnicity:', 'Inpatient Arrival Information

categorical.data[categorical.data=="Checked"] = "1"
```

```

categorical.data[categorical.data=="Unchecked"] = "0"
categorical.data[categorical.data=="Yes"] = "1"
categorical.data[categorical.data=="No"] = "0"
categorical.data[categorical.data=="Y"] = "1"
categorical.data[categorical.data=="N"] = "0"

categorical.data[] = lapply(categorical.data, as.factor)
categorical.data$'REDCap Record ID' = merged.data$'REDCap Record ID'
categorical.data$'Event Name' = merged.data$'Event Name'

## set baseline for categorical factors
categorical.data$'Patient Sex:' = relevel(categorical.data$'Patient Sex:', ref= "Female")
categorical.data$'Insurance Class' = relevel(categorical.data$'Insurance Class', ref= "COMM")
categorical.data$'Race:' = relevel(categorical.data$'Race:', ref= "White")
categorical.data$'Ethnicity:' = relevel(categorical.data$'Ethnicity:', ref= "Not Hispanic")
categorical.data$'Inpatient Arrival Information:' = relevel(categorical.data$'Inpatient Arrival Informa
categorical.data$'ABO' = relevel(categorical.data$'ABO', ref= "O")
categorical.data$'Rh' = relevel(categorical.data$'Rh', ref= "NEGATIVE")
categorical.data$'Blood_Type' = relevel(categorical.data$'Blood_Type', ref= "O NEGATIVE")
categorical.data$'ED Oxygen Delivery Method:' = relevel(categorical.data$'ED Oxygen Delivery Method:',
categorical.data$'Admission- Most Invasive Method of Oxygen Delivery:' = relevel(categorical.data$'Admi

# repair NAs when omission means no
categorical.data$'Was the patient pregnant upon admission?'[is.na(categorical.data$'Was the patient preg
categorical.data$'Is patient currently receiving treatment for cancer?'[is.na(categorical.data$'Is patie
categorical.data$'Was the patient on hemodialysis when plasma was given?'[is.na(categorical.data$'Was th
categorical.data$'Was the patient intubated when plasma was given?'[is.na(categorical.data$'Was the pat

numerical.data$'REDCap Record ID' = as.factor(numerical.data$'REDCap Record ID')
categorical.data$'REDCap Record ID' = as.factor(categorical.data$'REDCap Record ID')
date.data$'REDCap Record ID' = as.factor(date.data$'REDCap Record ID')

working.data = merge(categorical.data, numerical.data)
working.data = merge(working.data, date.data)

merged.data = working.data

merged.data$death = ifelse(merged.data$Dispo_Categories == "Expired", 1, 0)

## which data has clinical relevance?
relevant.columns = merged.data %>%
  dplyr::select('REDCap Record ID', 'Event Name', 'Patient Sex:', 'Insurance Class', 'Race:', 'Ethnicity

## redundant - covered by another category
# covid symptoms tend to be very correlated and are not thought to be 100% accurate or predictive of se
#"COVID Symptoms upon Arrival (choice=Cough)"
#"COVID Symptoms upon Arrival (choice=Fever)"
#"COVID Symptoms upon Arrival (choice=Shortness of breath/difficulty breathing)"
#"COVID Symptoms upon Arrival (choice=Chills)"
#"COVID Symptoms upon Arrival (choice=Muscle pain/aches)"
#"COVID Symptoms upon Arrival (choice=Sore throat)"
#"COVID Symptoms upon Arrival (choice=New loss of smell)"

```

```

#"COVID Symptoms upon Arrival (choice=New loss of taste)"
#"COVID Symptoms upon Arrival (choice=Nausea, vomiting or diarrhea)"
#"COVID Symptoms upon Arrival (choice=Congestion/runny nose)"
# Dispo_Categories - defined by death
# Blood_Type - covered by ABO and Rh
# Does the patient have a history of cardiovascular disease? - covered by more specific i.e. hypertensi
# Does the patient have a history of Chronic Respiratory Disease? - covered by COPD, asthma, obstructiv
# 'Please specify: (choice=History of solid organ transplant)' - included in immunosuppression (52 entri
# 'Please specify: (choice=HIV)' - included in immunosuppression (52 entries) compared to HIV 3 pts were
# Does the patient have a history of kidney disease? - covered by chronic renal insufficiency and end s
# Does the patient have a history of liver disease? - covered by cirrhosis and hep B/C
# Please specify: (choice=Obesity (BMI >30)) - continuous BMI used instead
# Please specify: (choice=Morbid Obesity (BMI >35)) - continuous BMI used instead
# ED Oxygen Delivery Method: - admission o2 was favored instead
# Was NPPV (noninvasive positive pressure ventilation) used for this patient? - covered in most invasiv
# Was the patient intubated at any time during admission? - covered in most invasive method
# Was a tracheostomy performed during this admission? - covered in most invasive method
# Median_Income - covered in per capita
# Percent_Higher_Income - covered in per capita
# Patient Height - covered in BMI
# Patient Weight - covered in BMI
# ED Temperature:, - covered in SIRS temp
# ED Pulse: - covered in SIRS pulse
# ED Respiratory Rate: - covered in SIRS RR
# WBC - covered in sirs wbc
# Admission- Highest Temperature Recorded:, - covered in SIRS temp
# Admission- Highest Pulse Recorded: - covered in SIRS pulse
# Admission- Highest Respiratory Rate Recorded - covered in SIRS RR
# WBC - covered in sirs wbc
# Date of Birth: covered by age
# Discharge Date: - using admission date instead

## non specific - cannot be well classified
# Inpatient Arrival Information:,

## non reliable
# Has the patient ever smoked?
# ED Oxygen Saturation (O2 Sat): - patients on different methods of o2 delivery
# Admission- Lowest Oxygen Saturation (O2 Sat) Recorded: - patients on different methods of o2 delivery

## Biased
# Discharged on Vent? - only those alive can be discharged
# Discharged on O2 therapy? - only those alive can be discharged
# Date of intubation: - not all patients intubated
# Date of extubation: - not all patients intubated
# Date of last hemodialysis treatment during admission: not all patients on hemodialysis
# Date.of.plasma.administration - not all patients got plasma
# time.until.plasma - not all patients got plasma # added in but not used - needed for later

```

```

# fully saturated
time.until.plasma.no.time.until.plasma = subset(relevant.columns, select = -c(time.until.plasma, 'Event
time.until.plasma.no.time.until.plasma.na = na.omit(time.until.plasma.no.time.until.plasma)

```

```
fully.saturated.model = glm(death ~ ., family = binomial, data = time.until.plasma.no.time.until.plasma
```

```
## Warning: glm.fit: algorithm did not converge
```

```
## Warning: glm.fit: fitted probabilities numerically 0 or 1 occurred
```

```
car::vif(fully.saturated.model)
```

```
##
##                                     GVIF
## 'Patient Sex:'                      6.204038e+01
## 'Insurance Class'                   1.666306e+03
## 'Race:'                              3.734968e+06
## 'Ethnicity:'                        2.055213e+03
## ABO                                  1.097717e+04
## Rh                                    2.419124e+01
## 'Was the patient pregnant upon admission?' 6.043293e+00
## 'Does the patient have a history of cancer?' 3.510520e+01
## 'Is patient currently receiving treatment for cancer?' 2.988159e+01
## 'Please specify: (choice=Hypertension)' 1.712293e+02
## 'Please specify: (choice=Coronary Artery Disease)' 2.411096e+02
## 'Please specify: (choice=Congestive Heart Failure)' 6.080781e+01
## 'Please specify: (choice=Asthma)' 8.253494e+01
## 'Please specify: (choice=Chronic Obstructive Pulmonary Disease)' 3.616245e+01
## 'Please specify: (choice=Obstructive Sleep Apnea)' 4.965129e+00
## 'Does the patient have a history of immunosuppression?' 3.520300e+01
## 'Please specify: (choice=Chronic Renal Insufficiency)' 6.102325e+01
## 'Please specify: (choice=End Stage Renal Failure)' 4.978539e+01
## 'Please specify: (choice=Chronic- Hepatitis B)' 2.401621e+00
## 'Please specify: (choice=Chronic- Hepatitis C)' 3.843962e+00
## 'Please specify: (choice=Cirrhosis)' 1.333371e+00
## 'Does the patient have a history of metabolic disease?' 2.671296e+02
## 'Please specify: (choice=Diabetes)' 6.517971e+01
## 'Admission- Most Invasive Method of Oxygen Delivery:' 8.699160e+07
## 'Did the patient receive hemodialysis during this admission?' 1.371557e+02
## 'Was plasma given to the patient during this admission?' 9.201037e+01
## 'Was the patient on hemodialysis when plasma was given?' 2.551141e+01
## 'Was the patient intubated when plasma was given?' 9.652517e+01
## 'Was the patient placed in a prone position during their admission?' 2.950574e+01
## 'COVID- Was hydroxychloroquine (Plaquenil) given during the patient's admission?' 2.839150e+02
## 'COVID- Was Remdesivir given during the patient's admission?' 4.840955e+01
## 'Was Nitric Oxide given during this admission?' 1.000108e+00
## 'Age at Admission' 1.069324e+02
## Per_Capita 3.521509e+01
## Length_of_Stay 6.614087e+01
## 'Patient BMI' 5.118321e+01
## 'SIRS TEMP' 1.156347e+02
## 'SIRS Pulse' 1.893295e+02
## 'SIRS RR' 4.623874e+01
## SIRS_WBC 6.846116e+01
## SIRS...110 1.704204e+02
## 'Creatinine (if 0 = N/A)' 3.030289e+02
## Ferritin 1.759147e+01
```

|                                                                                      |                 |
|--------------------------------------------------------------------------------------|-----------------|
| ## CRP                                                                               | 4.191883e+01    |
| ## 'D-Dimer'                                                                         | 1.895919e+02    |
| ## 'Admission Date:'                                                                 | 2.250582e+02    |
| ##                                                                                   | Df              |
| ## 'Patient Sex:'                                                                    | 1               |
| ## 'Insurance Class'                                                                 | 2               |
| ## 'Race:'                                                                           | 5               |
| ## 'Ethnicity:'                                                                      | 2               |
| ## ABO                                                                               | 4               |
| ## Rh                                                                                | 1               |
| ## 'Was the patient pregnant upon admission?'                                        | 1               |
| ## 'Does the patient have a history of cancer?'                                      | 1               |
| ## 'Is patient currently receiving treatment for cancer?'                            | 1               |
| ## 'Please specify: (choice=Hypertension)'                                           | 1               |
| ## 'Please specify: (choice=Coronary Artery Disease)'                                | 1               |
| ## 'Please specify: (choice=Congestive Heart Failure)'                               | 1               |
| ## 'Please specify: (choice=Asthma)'                                                 | 1               |
| ## 'Please specify: (choice=Chronic Obstructive Pulmonary Disease)'                  | 1               |
| ## 'Please specify: (choice=Obstructive Sleep Apnea)'                                | 1               |
| ## 'Does the patient have a history of immunosuppression?'                           | 1               |
| ## 'Please specify: (choice=Chronic Renal Insufficiency)'                            | 1               |
| ## 'Please specify: (choice=End Stage Renal Failure)'                                | 1               |
| ## 'Please specify: (choice=Chronic- Hepatitis B)'                                   | 1               |
| ## 'Please specify: (choice=Chronic- Hepatitis C)'                                   | 1               |
| ## 'Please specify: (choice=Cirrhosis)'                                              | 1               |
| ## 'Does the patient have a history of metabolic disease?'                           | 1               |
| ## 'Please specify: (choice=Diabetes)'                                               | 1               |
| ## 'Admission- Most Invasive Method of Oxygen Delivery:'                             | 6               |
| ## 'Did the patient receive hemodialysis during this admission?'                     | 1               |
| ## 'Was plasma given to the patient during this admission?'                          | 1               |
| ## 'Was the patient on hemodialysis when plasma was given?'                          | 1               |
| ## 'Was the patient intubated when plasma was given?'                                | 1               |
| ## 'Was the patient placed in a prone position during their admission?'              | 1               |
| ## 'COVID- Was hydroxychloroquine (Plaquenil) given during the patient's admission?' | 1               |
| ## 'COVID- Was Remdesivir given during the patient's admission?'                     | 1               |
| ## 'Was Nitric Oxide given during this admission?'                                   | 1               |
| ## 'Age at Admission'                                                                | 1               |
| ## Per_Capita                                                                        | 1               |
| ## Length_of_Stay                                                                    | 1               |
| ## 'Patient BMI'                                                                     | 1               |
| ## 'SIRS TEMP'                                                                       | 1               |
| ## 'SIRS Pulse'                                                                      | 1               |
| ## 'SIRS RR'                                                                         | 1               |
| ## SIRS_WBC                                                                          | 1               |
| ## SIRS...110                                                                        | 1               |
| ## 'Creatinine (if 0 = N/A)'                                                         | 1               |
| ## Ferritin                                                                          | 1               |
| ## CRP                                                                               | 1               |
| ## 'D-Dimer'                                                                         | 1               |
| ## 'Admission Date:'                                                                 | 1               |
| ##                                                                                   | GVIF^(1/(2*Df)) |
| ## 'Patient Sex:'                                                                    | 7.876572        |
| ## 'Insurance Class'                                                                 | 6.389085        |
| ## 'Race:'                                                                           | 4.541807        |

```

## 'Ethnicity:' 6.733087
## ABO 3.199347
## Rh 4.918459
## 'Was the patient pregnant upon admission?' 2.458311
## 'Does the patient have a history of cancer?' 5.924965
## 'Is patient currently receiving treatment for cancer?' 5.466406
## 'Please specify: (choice=Hypertension)' 13.085463
## 'Please specify: (choice=Coronary Artery Disease)' 15.527704
## 'Please specify: (choice=Congestive Heart Failure)' 7.797936
## 'Please specify: (choice=Asthma)' 9.084874
## 'Please specify: (choice=Chronic Obstructive Pulmonary Disease)' 6.013523
## 'Please specify: (choice=Obstructive Sleep Apnea)' 2.228257
## 'Does the patient have a history of immunosuppression?' 5.933212
## 'Please specify: (choice=Chronic Renal Insufficiency)' 7.811738
## 'Please specify: (choice=End Stage Renal Failure)' 7.055876
## 'Please specify: (choice=Chronic- Hepatitis B)' 1.549716
## 'Please specify: (choice=Chronic- Hepatitis C)' 1.960602
## 'Please specify: (choice=Cirrhosis)' 1.154717
## 'Does the patient have a history of metabolic disease?' 16.344100
## 'Please specify: (choice=Diabetes)' 8.073395
## 'Admission- Most Invasive Method of Oxygen Delivery:' 4.587997
## 'Did the patient receive hemodialysis during this admission?' 11.711347
## 'Was plasma given to the patient during this admission?' 9.592204
## 'Was the patient on hemodialysis when plasma was given?' 5.050882
## 'Was the patient intubated when plasma was given?' 9.824722
## 'Was the patient placed in a prone position during their admission?' 5.431919
## 'COVID- Was hydroxychloroquine (Plaquenil) given during the patient's admission?' 16.849778
## 'COVID- Was Remdesivir given during the patient's admission?' 6.957697
## 'Was Nitric Oxide given during this admission?' 1.000054
## 'Age at Admission' 10.340813
## Per_Capita 5.934230
## Length_of_Stay 8.132704
## 'Patient BMI' 7.154244
## 'SIRS TEMP' 10.753356
## 'SIRS Pulse' 13.759704
## 'SIRS RR' 6.799907
## SIRS_WBC 8.274126
## SIRS...110 13.054518
## 'Creatinine (if 0 = N/A)' 17.407727
## Ferritin 4.194219
## CRP 6.474475
## 'D-Domer' 13.769238
## 'Admission Date:' 15.001941

```

```

fully.saturated.summary = summary(fully.saturated.model)
fully.saturated.summary.p.values = fully.saturated.summary$coefficients[,4]
fully.saturated.conf.intervals = exp(cbind(coef(fully.saturated.model), confint(fully.saturated.model)))

```

```
## Waiting for profiling to be done...
```

```
## Warning: glm.fit: fitted probabilities numerically 0 or 1 occurred
```

```
## Warning: glm.fit: fitted probabilities numerically 0 or 1 occurred
```











```
## Warning: glm.fit: fitted probabilities numerically 0 or 1 occurred
## Warning: glm.fit: fitted probabilities numerically 0 or 1 occurred
## Warning: glm.fit: fitted probabilities numerically 0 or 1 occurred
## Warning: glm.fit: fitted probabilities numerically 0 or 1 occurred
## Warning: glm.fit: fitted probabilities numerically 0 or 1 occurred
## Warning: glm.fit: fitted probabilities numerically 0 or 1 occurred
## Warning: glm.fit: fitted probabilities numerically 0 or 1 occurred
## Warning: glm.fit: fitted probabilities numerically 0 or 1 occurred
## Warning: glm.fit: fitted probabilities numerically 0 or 1 occurred
## Warning: glm.fit: fitted probabilities numerically 0 or 1 occurred
## Warning: glm.fit: fitted probabilities numerically 0 or 1 occurred
## Warning: glm.fit: fitted probabilities numerically 0 or 1 occurred
## Warning: glm.fit: fitted probabilities numerically 0 or 1 occurred
## Warning: glm.fit: fitted probabilities numerically 0 or 1 occurred
## Warning: glm.fit: fitted probabilities numerically 0 or 1 occurred
## Warning: glm.fit: fitted probabilities numerically 0 or 1 occurred
## Warning: glm.fit: fitted probabilities numerically 0 or 1 occurred
## Warning: glm.fit: fitted probabilities numerically 0 or 1 occurred
## Warning: glm.fit: fitted probabilities numerically 0 or 1 occurred
```

```
fully.saturated.conf.intervals.df = data.frame(fully.saturated.conf.intervals)
fully.saturated.conf.intervals.df$p.values = fully.saturated.summary.p.values
```

```
fully.saturated.death = time.until.plasma.no.time.until.plasma.na$death
logitgof(fully.saturated.death, fitted(fully.saturated.model), g = 10)
```

```
## Warning in logitgof(fully.saturated.death, fitted(fully.saturated.model), :
## At least one cell in the expected frequencies table is < 1. Chi-square
## approximation may be incorrect.
```

```
## Warning in logitgof(fully.saturated.death, fitted(fully.saturated.model), : Not
## possible to compute 10 rows. There might be too few observations.
```

```
##
## Hosmer and Lemeshow test (binary model)
##
## data: fully.saturated.death, fitted(fully.saturated.model)
## X-squared = 2.9939e-09, df = 3, p-value = 1
```

We need to select fewer variables

```
exit.df = data.frame()

for ( i in 3:ncol(relevant.columns)){ # first column is just redcap number and second is always first v
  middle = relevant.columns
  variable.selected = middle[[i]]
  middle.glm = glm(middle$death~ variable.selected, family = binomial)
  middle.glm.summary = summary(middle.glm)
  middle.glm.summary.df = data.frame(middle.glm.summary$coefficients)
  middle.glm.summary.df = middle.glm.summary.df[-1,] # delete intercept row

  column.name.selected = colnames(middle)[i]
  if (nrow(middle.glm.summary.df) == 1){
    row.names(middle.glm.summary.df) = paste(column.name.selected)
  }

  exit.df = rbind(exit.df, middle.glm.summary.df)
  # print(colnames(middle)[i])
  # print(summary(middle.glm))
}
```

```
## Warning: glm.fit: fitted probabilities numerically 0 or 1 occurred
```

```
## Warning: glm.fit: algorithm did not converge
```

```
p.values.under.0.25 = exit.df[exit.df$Pr...z.. < 0.25, ]
row.names.0.25 = row.names(p.values.under.0.25)
# we do not want nitric oxide because of small sample size and lack of clinical interest
# we do not want lenght of stay due to it being inherently biased, dead patients cannot stay longer, an

under.0.25.variables = relevant.columns %>%
  dplyr::select('REDCap Record ID', 'Insurance Class', 'Race:', 'Does the patient have a history of can

complete.df = na.omit(under.0.25.variables) # 328 with complete data frames for relevant variables
```

```
# saturated glm
## MODEL 1a
under.0.25.variables.no.redcap = subset(complete.df, select = -c('REDCap Record ID', 'Was the patient i

saturated.log.reg = glm(death ~ . , data = under.0.25.variables.no.redcap, family = binomial)
```

```
## Warning: glm.fit: fitted probabilities numerically 0 or 1 occurred
```

```
saturated.log.reg.summary = summary(saturated.log.reg) # AIC = 297
car::vif(saturated.log.reg)
```

```
##
## 'Insurance Class' 2.797984
## 'Race:' 4.757903
## 'Does the patient have a history of cancer?' 1.134076
```

|                                                                                      |                 |
|--------------------------------------------------------------------------------------|-----------------|
| ## 'Please specify: (choice=Hypertension)'                                           | 1.417598        |
| ## 'Please specify: (choice=Coronary Artery Disease)'                                | 1.361416        |
| ## 'Please specify: (choice=Congestive Heart Failure)'                               | 1.432517        |
| ## 'Please specify: (choice=Asthma)'                                                 | 1.136721        |
| ## 'Please specify: (choice=Chronic Obstructive Pulmonary Disease)'                  | 1.223437        |
| ## 'Please specify: (choice=Chronic Renal Insufficiency)'                            | 1.186312        |
| ## 'Please specify: (choice=Cirrhosis)'                                              | 2.000000        |
| ## 'Did the patient receive hemodialysis during this admission?'                     | 1.488230        |
| ## 'Was plasma given to the patient during this admission?'                          | 1.298881        |
| ## 'Was the patient placed in a prone position during their admission?'              | 1.246841        |
| ## 'COVID- Was hydroxychloroquine (Plaquenil) given during the patient's admission?' | 1.621518        |
| ## 'Age at Admission'                                                                | 2.975064        |
| ## Per_Capita                                                                        | 1.317379        |
| ## 'SIRS RR'                                                                         | 1.924746        |
| ## SIRS_WBC                                                                          | 1.602017        |
| ## SIRS...110                                                                        | 3.403843        |
| ## 'Creatinine (if 0 = N/A)'                                                         | 1.546424        |
| ## Ferritin                                                                          | 1.263702        |
| ## CRP                                                                               | 1.265780        |
| ## 'D-Domer'                                                                         | 1.235909        |
| ## 'Admission Date:'                                                                 | 1.599484        |
| ## 'Please specify: (choice=Diabetes)'                                               | 1.221311        |
| ## 'SIRS TEMP'                                                                       | 1.806426        |
| ## 'Please specify: (choice=Chronic- Hepatitis C)'                                   | 3.000000        |
| ##                                                                                   | Df              |
| ## 'Insurance Class'                                                                 | 3               |
| ## 'Race:'                                                                           | 5               |
| ## 'Does the patient have a history of cancer?'                                      | 1               |
| ## 'Please specify: (choice=Hypertension)'                                           | 1               |
| ## 'Please specify: (choice=Coronary Artery Disease)'                                | 1               |
| ## 'Please specify: (choice=Congestive Heart Failure)'                               | 1               |
| ## 'Please specify: (choice=Asthma)'                                                 | 1               |
| ## 'Please specify: (choice=Chronic Obstructive Pulmonary Disease)'                  | 1               |
| ## 'Please specify: (choice=Chronic Renal Insufficiency)'                            | 1               |
| ## 'Please specify: (choice=Cirrhosis)'                                              | 1               |
| ## 'Did the patient receive hemodialysis during this admission?'                     | 1               |
| ## 'Was plasma given to the patient during this admission?'                          | 1               |
| ## 'Was the patient placed in a prone position during their admission?'              | 1               |
| ## 'COVID- Was hydroxychloroquine (Plaquenil) given during the patient's admission?' | 1               |
| ## 'Age at Admission'                                                                | 1               |
| ## Per_Capita                                                                        | 1               |
| ## 'SIRS RR'                                                                         | 1               |
| ## SIRS_WBC                                                                          | 1               |
| ## SIRS...110                                                                        | 1               |
| ## 'Creatinine (if 0 = N/A)'                                                         | 1               |
| ## Ferritin                                                                          | 1               |
| ## CRP                                                                               | 1               |
| ## 'D-Domer'                                                                         | 1               |
| ## 'Admission Date:'                                                                 | 1               |
| ## 'Please specify: (choice=Diabetes)'                                               | 1               |
| ## 'SIRS TEMP'                                                                       | 1               |
| ## 'Please specify: (choice=Chronic- Hepatitis C)'                                   | 1               |
| ##                                                                                   | GVIF^(1/(2*Df)) |
| ## 'Insurance Class'                                                                 | 1.187064        |

```

## 'Race:' 1.168804
## 'Does the patient have a history of cancer?' 1.064930
## 'Please specify: (choice=Hypertension)' 1.190629
## 'Please specify: (choice=Coronary Artery Disease)' 1.166797
## 'Please specify: (choice=Congestive Heart Failure)' 1.196878
## 'Please specify: (choice=Asthma)' 1.066171
## 'Please specify: (choice=Chronic Obstructive Pulmonary Disease)' 1.106091
## 'Please specify: (choice=Chronic Renal Insufficiency)' 1.089179
## 'Please specify: (choice=Cirrhosis)' 1.414214
## 'Did the patient receive hemodialysis during this admission?' 1.219930
## 'Was plasma given to the patient during this admission?' 1.139685
## 'Was the patient placed in a prone position during their admission?' 1.116620
## 'COVID- Was hydroxychloroquine (Plaquenil) given during the patient's admission?' 1.273388
## 'Age at Admission' 1.724837
## Per_Capita 1.147771
## 'SIRS RR' 1.387352
## SIRS_WBC 1.265708
## SIRS...110 1.844951
## 'Creatinine (if 0 = N/A)' 1.243553
## Ferritin 1.124145
## CRP 1.125069
## 'D-Domer' 1.111715
## 'Admission Date:' 1.264707
## 'Please specify: (choice=Diabetes)' 1.105129
## 'SIRS TEMP' 1.344033
## 'Please specify: (choice=Chronic- Hepatitis C)' 1.732051

```

```

saturated.log.reg.summary.p.values = saturated.log.reg.summary$coefficients[,4]
saturated.log.reg.conf.intervals = exp(cbind(coef(saturated.log.reg), confint(saturated.log.reg)))

```

```
## Waiting for profiling to be done...
```

```

## Warning: glm.fit: fitted probabilities numerically 0 or 1 occurred
## Warning: glm.fit: fitted probabilities numerically 0 or 1 occurred
## Warning: glm.fit: fitted probabilities numerically 0 or 1 occurred
## Warning: glm.fit: fitted probabilities numerically 0 or 1 occurred
## Warning: glm.fit: fitted probabilities numerically 0 or 1 occurred
## Warning: glm.fit: fitted probabilities numerically 0 or 1 occurred
## Warning: glm.fit: fitted probabilities numerically 0 or 1 occurred
## Warning: glm.fit: fitted probabilities numerically 0 or 1 occurred
## Warning: glm.fit: fitted probabilities numerically 0 or 1 occurred
## Warning: glm.fit: fitted probabilities numerically 0 or 1 occurred
## Warning: glm.fit: fitted probabilities numerically 0 or 1 occurred

```































```
## Warning: glm.fit: fitted probabilities numerically 0 or 1 occurred
## Warning: glm.fit: fitted probabilities numerically 0 or 1 occurred
## Warning: glm.fit: fitted probabilities numerically 0 or 1 occurred
## Warning: glm.fit: fitted probabilities numerically 0 or 1 occurred
## Warning: glm.fit: fitted probabilities numerically 0 or 1 occurred
## Warning: glm.fit: fitted probabilities numerically 0 or 1 occurred
## Warning: glm.fit: fitted probabilities numerically 0 or 1 occurred
## Warning: glm.fit: fitted probabilities numerically 0 or 1 occurred
## Warning: glm.fit: fitted probabilities numerically 0 or 1 occurred
## Warning: glm.fit: fitted probabilities numerically 0 or 1 occurred
## Warning: glm.fit: fitted probabilities numerically 0 or 1 occurred
## Warning: glm.fit: fitted probabilities numerically 0 or 1 occurred
## Warning: glm.fit: fitted probabilities numerically 0 or 1 occurred
## Warning: glm.fit: fitted probabilities numerically 0 or 1 occurred
## Warning: glm.fit: fitted probabilities numerically 0 or 1 occurred
## Warning in regularize.values(x, y, ties, missing(ties), na.rm = na.rm):
## collapsing to unique 'x' values
## Warning in regularize.values(x, y, ties, missing(ties), na.rm = na.rm):
## collapsing to unique 'x' values
```

```
saturated.log.reg.conf.intervals.df = data.frame(saturated.log.reg.conf.intervals)
saturated.log.reg.conf.intervals.df$p.values = saturated.log.reg.summary.p.values
```

```
under.0.25.variables.no.redcap.death = under.0.25.variables.no.redcap$death
logitgof(under.0.25.variables.no.redcap.death, fitted(saturated.log.reg), g = 10) # Hosmer Lemeshow goo
```

```
## Warning in logitgof(under.0.25.variables.no.redcap.death,
## fitted(saturated.log.reg), : At least one cell in the expected frequencies table
## is < 1. Chi-square approximation may be incorrect.
```

```
##
## Hosmer and Lemeshow test (binary model)
##
## data: under.0.25.variables.no.redcap.death, fitted(saturated.log.reg)
## X-squared = 5.9613, df = 8, p-value = 0.6516
```

```
## can we improve the saturated model with backwards selection?
```

```
step(saturated.log.reg) # function actually run - just slows down computer
```

```
## Start: AIC=296.89
```

```
## death ~ 'Insurance Class' + 'Race:' + 'Does the patient have a history of cancer?' +  
## 'Please specify: (choice=Hypertension)' + 'Please specify: (choice=Coronary Artery Disease)' +  
## 'Please specify: (choice=Congestive Heart Failure)' + 'Please specify: (choice=Asthma)' +  
## 'Please specify: (choice=Chronic Obstructive Pulmonary Disease)' +  
## 'Please specify: (choice=Chronic Renal Insufficiency)' +  
## 'Please specify: (choice=Cirrhosis)' + 'Did the patient receive hemodialysis during this admission?' +  
## 'Was plasma given to the patient during this admission?' +  
## 'Was the patient placed in a prone position during their admission?' +  
## 'COVID- Was hydroxychloroquine (Plaquenil) given during the patient's admission?' +  
## 'Age at Admission' + Per_Capita + 'SIRS RR' + SIRS_WBC +  
## SIRS...110 + 'Creatinine (if 0 = N/A)' + Ferritin + CRP +  
## 'D-Domer' + 'Admission Date:' + 'Please specify: (choice=Diabetes)' +  
## 'SIRS TEMP' + 'Please specify: (choice=Chronic- Hepatitis C)'
```

```
## Warning: glm.fit: fitted probabilities numerically 0 or 1 occurred
```

```
## Warning: glm.fit: fitted probabilities numerically 0 or 1 occurred
```

```
## Warning: glm.fit: fitted probabilities numerically 0 or 1 occurred
```

```
## Warning: glm.fit: fitted probabilities numerically 0 or 1 occurred
```

```
## Warning: glm.fit: fitted probabilities numerically 0 or 1 occurred
```

```
## Warning: glm.fit: fitted probabilities numerically 0 or 1 occurred
```

```
## Warning: glm.fit: fitted probabilities numerically 0 or 1 occurred
```

```
## Warning: glm.fit: fitted probabilities numerically 0 or 1 occurred
```

```
## Warning: glm.fit: fitted probabilities numerically 0 or 1 occurred
```

```
## Warning: glm.fit: fitted probabilities numerically 0 or 1 occurred
```

```
## Warning: glm.fit: fitted probabilities numerically 0 or 1 occurred
```

```
## Warning: glm.fit: fitted probabilities numerically 0 or 1 occurred
```

```
## Warning: glm.fit: fitted probabilities numerically 0 or 1 occurred
```

```
## Warning: glm.fit: fitted probabilities numerically 0 or 1 occurred
```

```
## Warning: glm.fit: fitted probabilities numerically 0 or 1 occurred
```

```
## Warning: glm.fit: fitted probabilities numerically 0 or 1 occurred
```

```
## Warning: glm.fit: fitted probabilities numerically 0 or 1 occurred
```

```

## Warning: glm.fit: fitted probabilities numerically 0 or 1 occurred
## Warning: glm.fit: fitted probabilities numerically 0 or 1 occurred
## Warning: glm.fit: fitted probabilities numerically 0 or 1 occurred
## Warning: glm.fit: fitted probabilities numerically 0 or 1 occurred
## Warning: glm.fit: fitted probabilities numerically 0 or 1 occurred
## Warning: glm.fit: fitted probabilities numerically 0 or 1 occurred
## Warning: glm.fit: fitted probabilities numerically 0 or 1 occurred
## Warning: glm.fit: fitted probabilities numerically 0 or 1 occurred
## Warning: glm.fit: fitted probabilities numerically 0 or 1 occurred
## Warning: glm.fit: fitted probabilities numerically 0 or 1 occurred
## Warning: glm.fit: fitted probabilities numerically 0 or 1 occurred
## Warning: glm.fit: fitted probabilities numerically 0 or 1 occurred

```

```

##
## - 'Race:' Df
## - 'Please specify: (choice=Diabetes)‘ 5
## - 'Please specify: (choice=Coronary Artery Disease)‘ 1
## - 'Please specify: (choice=Asthma)‘ 1
## - Per_Capita 1
## - 'Please specify: (choice=Cirrhosis)‘ 1
## - 'Please specify: (choice=Chronic Obstructive Pulmonary Disease)‘ 1
## - 'SIRS TEMP‘ 1
## - 'Admission Date:' 1
## - 'Creatinine (if 0 = N/A)‘ 1
## - 'D-Domer‘ 1
## - 'Does the patient have a history of cancer?‘ 1
## - 'Please specify: (choice=Congestive Heart Failure)‘ 1
## <none>
## - 'Please specify: (choice=Hypertension)‘ 1
## - 'Please specify: (choice=Chronic Renal Insufficiency)‘ 1
## - SIRS_WBC 1
## - SIRS...110 1
## - 'Insurance Class‘ 3
## - 'SIRS RR‘ 1
## - 'Please specify: (choice=Chronic- Hepatitis C)‘ 1
## - 'Was the patient placed in a prone position during their admission?‘ 1
## - Ferritin 1
## - 'Age at Admission‘ 1
## - CRP 1
## - 'Was plasma given to the patient during this admission?‘ 1
## - 'COVID- Was hydroxychloroquine (Plaquenil) given during the patient's admission?‘ 1
## - 'Did the patient receive hemodialysis during this admission?‘ 1
## Deviance
## - 'Race:' 231.63
## - 'Please specify: (choice=Diabetes)‘ 228.89
## - 'Please specify: (choice=Coronary Artery Disease)‘ 228.91
## - 'Please specify: (choice=Asthma)‘ 228.93

```



|                                                                                        |        |
|----------------------------------------------------------------------------------------|--------|
| ## - Per_Capita                                                                        | 228.99 |
| ## - 'Please specify: (choice=Cirrhosis)'                                              | 229.06 |
| ## - 'Please specify: (choice=Chronic Obstructive Pulmonary Disease)'                  | 229.10 |
| ## - 'SIRS TEMP'                                                                       | 229.23 |
| ## - 'Admission Date:'                                                                 | 229.34 |
| ## - 'Creatinine (if 0 = N/A)'                                                         | 229.39 |
| ## - 'D-Domer'                                                                         | 229.66 |
| ## - 'Does the patient have a history of cancer?'                                      | 230.56 |
| ## - 'Please specify: (choice=Congestive Heart Failure)'                               | 230.82 |
| ## <none>                                                                              | 228.89 |
| ## - 'Please specify: (choice=Hypertension)'                                           | 231.25 |
| ## - 'Please specify: (choice=Chronic Renal Insufficiency)'                            | 231.25 |
| ## - SIRS_WBC                                                                          | 231.43 |
| ## - SIRS...110                                                                        | 231.96 |
| ## - 'Insurance Class'                                                                 | 236.15 |
| ## - 'SIRS RR'                                                                         | 232.23 |
| ## - 'Please specify: (choice=Chronic- Hepatitis C)'                                   | 232.49 |
| ## - 'Was the patient placed in a prone position during their admission?'              | 235.11 |
| ## - Ferritin                                                                          | 235.29 |
| ## - 'Age at Admission'                                                                | 235.56 |
| ## - CRP                                                                               | 235.70 |
| ## - 'Was plasma given to the patient during this admission?'                          | 236.22 |
| ## - 'COVID- Was hydroxychloroquine (Plaquenil) given during the patient's admission?' | 236.49 |
| ## - 'Did the patient receive hemodialysis during this admission?'                     | 240.38 |
| ##                                                                                     | AIC    |
| ## - 'Race:'                                                                           | 289.63 |
| ## - 'Please specify: (choice=Diabetes)'                                               | 294.89 |
| ## - 'Please specify: (choice=Coronary Artery Disease)'                                | 294.90 |
| ## - 'Please specify: (choice=Asthma)'                                                 | 294.93 |
| ## - Per_Capita                                                                        | 294.99 |
| ## - 'Please specify: (choice=Cirrhosis)'                                              | 295.06 |
| ## - 'Please specify: (choice=Chronic Obstructive Pulmonary Disease)'                  | 295.10 |
| ## - 'SIRS TEMP'                                                                       | 295.23 |
| ## - 'Admission Date:'                                                                 | 295.34 |
| ## - 'Creatinine (if 0 = N/A)'                                                         | 295.39 |
| ## - 'D-Domer'                                                                         | 295.66 |
| ## - 'Does the patient have a history of cancer?'                                      | 296.56 |
| ## - 'Please specify: (choice=Congestive Heart Failure)'                               | 296.82 |
| ## <none>                                                                              | 296.89 |
| ## - 'Please specify: (choice=Hypertension)'                                           | 297.25 |
| ## - 'Please specify: (choice=Chronic Renal Insufficiency)'                            | 297.25 |
| ## - SIRS_WBC                                                                          | 297.43 |
| ## - SIRS...110                                                                        | 297.95 |
| ## - 'Insurance Class'                                                                 | 298.15 |
| ## - 'SIRS RR'                                                                         | 298.23 |
| ## - 'Please specify: (choice=Chronic- Hepatitis C)'                                   | 298.49 |
| ## - 'Was the patient placed in a prone position during their admission?'              | 301.11 |
| ## - Ferritin                                                                          | 301.29 |
| ## - 'Age at Admission'                                                                | 301.56 |
| ## - CRP                                                                               | 301.70 |
| ## - 'Was plasma given to the patient during this admission?'                          | 302.22 |
| ## - 'COVID- Was hydroxychloroquine (Plaquenil) given during the patient's admission?' | 302.49 |
| ## - 'Did the patient receive hemodialysis during this admission?'                     | 306.38 |

```
## Warning: glm.fit: fitted probabilities numerically 0 or 1 occurred
##
## Step: AIC=289.63
## death ~ 'Insurance Class' + 'Does the patient have a history of cancer?' +
## 'Please specify: (choice=Hypertension)' + 'Please specify: (choice=Coronary Artery Disease)' +
## 'Please specify: (choice=Congestive Heart Failure)' + 'Please specify: (choice=Asthma)' +
## 'Please specify: (choice=Chronic Obstructive Pulmonary Disease)' +
## 'Please specify: (choice=Chronic Renal Insufficiency)' +
## 'Please specify: (choice=Cirrhosis)' + 'Did the patient receive hemodialysis during this admission?' +
## 'Was plasma given to the patient during this admission?' +
## 'Was the patient placed in a prone position during their admission?' +
## 'COVID- Was hydroxychloroquine (Plaquenil) given during the patient's admission?' +
## 'Age at Admission' + Per_Capita + 'SIRS RR' + SIRS_WBC +
## SIRS...110 + 'Creatinine (if 0 = N/A)' + Ferritin + CRP +
## 'D-Domer' + 'Admission Date:' + 'Please specify: (choice=Diabetes)' +
## 'SIRS TEMP' + 'Please specify: (choice=Chronic- Hepatitis C)'

## Warning: glm.fit: fitted probabilities numerically 0 or 1 occurred
## Warning: glm.fit: fitted probabilities numerically 0 or 1 occurred
## Warning: glm.fit: fitted probabilities numerically 0 or 1 occurred
## Warning: glm.fit: fitted probabilities numerically 0 or 1 occurred
## Warning: glm.fit: fitted probabilities numerically 0 or 1 occurred
## Warning: glm.fit: fitted probabilities numerically 0 or 1 occurred
## Warning: glm.fit: fitted probabilities numerically 0 or 1 occurred
## Warning: glm.fit: fitted probabilities numerically 0 or 1 occurred
## Warning: glm.fit: fitted probabilities numerically 0 or 1 occurred
## Warning: glm.fit: fitted probabilities numerically 0 or 1 occurred
## Warning: glm.fit: fitted probabilities numerically 0 or 1 occurred
## Warning: glm.fit: fitted probabilities numerically 0 or 1 occurred
## Warning: glm.fit: fitted probabilities numerically 0 or 1 occurred
## Warning: glm.fit: fitted probabilities numerically 0 or 1 occurred
## Warning: glm.fit: fitted probabilities numerically 0 or 1 occurred
## Warning: glm.fit: fitted probabilities numerically 0 or 1 occurred
## Warning: glm.fit: fitted probabilities numerically 0 or 1 occurred
## Warning: glm.fit: fitted probabilities numerically 0 or 1 occurred
## Warning: glm.fit: fitted probabilities numerically 0 or 1 occurred
## Warning: glm.fit: fitted probabilities numerically 0 or 1 occurred
## Warning: glm.fit: fitted probabilities numerically 0 or 1 occurred
## Warning: glm.fit: fitted probabilities numerically 0 or 1 occurred
## Warning: glm.fit: fitted probabilities numerically 0 or 1 occurred
## Warning: glm.fit: fitted probabilities numerically 0 or 1 occurred
## Warning: glm.fit: fitted probabilities numerically 0 or 1 occurred
## Warning: glm.fit: fitted probabilities numerically 0 or 1 occurred
## Warning: glm.fit: fitted probabilities numerically 0 or 1 occurred
## Warning: glm.fit: fitted probabilities numerically 0 or 1 occurred
## Warning: glm.fit: fitted probabilities numerically 0 or 1 occurred
```

```

## Warning: glm.fit: fitted probabilities numerically 0 or 1 occurred
## Warning: glm.fit: fitted probabilities numerically 0 or 1 occurred
## Warning: glm.fit: fitted probabilities numerically 0 or 1 occurred
## Warning: glm.fit: fitted probabilities numerically 0 or 1 occurred
## Warning: glm.fit: fitted probabilities numerically 0 or 1 occurred
## Warning: glm.fit: fitted probabilities numerically 0 or 1 occurred
## Warning: glm.fit: fitted probabilities numerically 0 or 1 occurred
## Warning: glm.fit: fitted probabilities numerically 0 or 1 occurred

```

|                                                                                        | Df       |
|----------------------------------------------------------------------------------------|----------|
| ## - 'Please specify: (choice=Coronary Artery Disease)'                                | 1        |
| ## - 'Please specify: (choice=Diabetes)'                                               | 1        |
| ## - 'Please specify: (choice=Asthma)'                                                 | 1        |
| ## - Per_Capita                                                                        | 1        |
| ## - 'Please specify: (choice=Cirrhosis)'                                              | 1        |
| ## - 'Please specify: (choice=Chronic Obstructive Pulmonary Disease)'                  | 1        |
| ## - 'SIRS TEMP'                                                                       | 1        |
| ## - 'Admission Date:'                                                                 | 1        |
| ## - 'Creatinine (if 0 = N/A)'                                                         | 1        |
| ## - 'D-Domer'                                                                         | 1        |
| ## - 'Does the patient have a history of cancer?'                                      | 1        |
| ## - 'Please specify: (choice=Congestive Heart Failure)'                               | 1        |
| ## - 'Please specify: (choice=Hypertension)'                                           | 1        |
| ## <none>                                                                              |          |
| ## - SIRS_WBC                                                                          | 1        |
| ## - 'Please specify: (choice=Chronic Renal Insufficiency)'                            | 1        |
| ## - SIRS...110                                                                        | 1        |
| ## - 'SIRS RR'                                                                         | 1        |
| ## - 'Insurance Class'                                                                 | 3        |
| ## - 'Please specify: (choice=Chronic- Hepatitis C)'                                   | 1        |
| ## - 'COVID- Was hydroxychloroquine (Plaquenil) given during the patient's admission?' | 1        |
| ## - 'Was the patient placed in a prone position during their admission?'              | 1        |
| ## - 'Age at Admission'                                                                | 1        |
| ## - Ferritin                                                                          | 1        |
| ## - CRP                                                                               | 1        |
| ## - 'Was plasma given to the patient during this admission?'                          | 1        |
| ## - 'Did the patient receive hemodialysis during this admission?'                     | 1        |
| ##                                                                                     | Deviance |
| ## - 'Please specify: (choice=Coronary Artery Disease)'                                | 231.63   |
| ## - 'Please specify: (choice=Diabetes)'                                               | 231.64   |
| ## - 'Please specify: (choice=Asthma)'                                                 | 231.65   |
| ## - Per_Capita                                                                        | 231.68   |
| ## - 'Please specify: (choice=Cirrhosis)'                                              | 231.80   |
| ## - 'Please specify: (choice=Chronic Obstructive Pulmonary Disease)'                  | 231.90   |
| ## - 'SIRS TEMP'                                                                       | 231.98   |
| ## - 'Admission Date:'                                                                 | 232.01   |
| ## - 'Creatinine (if 0 = N/A)'                                                         | 232.14   |
| ## - 'D-Domer'                                                                         | 232.49   |
| ## - 'Does the patient have a history of cancer?'                                      | 233.06   |

```

## - 'Please specify: (choice=Congestive Heart Failure)' 233.32
## - 'Please specify: (choice=Hypertension)' 233.44
## <none> 231.63
## - SIRS_WBC 233.94
## - 'Please specify: (choice=Chronic Renal Insufficiency)' 234.14
## - SIRS...110 234.51
## - 'SIRS RR' 234.73
## - 'Insurance Class' 239.03
## - 'Please specify: (choice=Chronic- Hepatitis C)' 235.52
## - 'COVID- Was hydroxychloroquine (Plaquenil) given during the patient's admission?' 238.31
## - 'Was the patient placed in a prone position during their admission?' 238.31
## - 'Age at Admission' 238.54
## - Ferritin 238.60
## - CRP 239.30
## - 'Was plasma given to the patient during this admission?' 239.32
## - 'Did the patient receive hemodialysis during this admission?' 244.29
## AIC
## - 'Please specify: (choice=Coronary Artery Disease)' 287.63
## - 'Please specify: (choice=Diabetes)' 287.64
## - 'Please specify: (choice=Asthma)' 287.65
## - Per_Capita 287.68
## - 'Please specify: (choice=Cirrhosis)' 287.80
## - 'Please specify: (choice=Chronic Obstructive Pulmonary Disease)' 287.90
## - 'SIRS TEMP' 287.98
## - 'Admission Date:' 288.01
## - 'Creatinine (if 0 = N/A)' 288.14
## - 'D-Domer' 288.49
## - 'Does the patient have a history of cancer?' 289.06
## - 'Please specify: (choice=Congestive Heart Failure)' 289.32
## - 'Please specify: (choice=Hypertension)' 289.44
## <none> 289.63
## - SIRS_WBC 289.94
## - 'Please specify: (choice=Chronic Renal Insufficiency)' 290.14
## - SIRS...110 290.51
## - 'SIRS RR' 290.73
## - 'Insurance Class' 291.03
## - 'Please specify: (choice=Chronic- Hepatitis C)' 291.52
## - 'COVID- Was hydroxychloroquine (Plaquenil) given during the patient's admission?' 294.31
## - 'Was the patient placed in a prone position during their admission?' 294.31
## - 'Age at Admission' 294.54
## - Ferritin 294.60
## - CRP 295.30
## - 'Was plasma given to the patient during this admission?' 295.32
## - 'Did the patient receive hemodialysis during this admission?' 300.29

```

```
## Warning: glm.fit: fitted probabilities numerically 0 or 1 occurred
```

```
##
```

```
## Step: AIC=287.63
```

```
## death ~ 'Insurance Class' + 'Does the patient have a history of cancer?' +
```

```
## 'Please specify: (choice=Hypertension)' + 'Please specify: (choice=Congestive Heart Failure)' +
```

```
## 'Please specify: (choice=Asthma)' + 'Please specify: (choice=Chronic Obstructive Pulmonary Disease)' +
```

```
## 'Please specify: (choice=Chronic Renal Insufficiency)' +
```

```
## 'Please specify: (choice=Cirrhosis)' + 'Did the patient receive hemodialysis during this admission?'
```

```
## 'Was plasma given to the patient during this admission?' +
## 'Was the patient placed in a prone position during their admission?' +
## 'COVID- Was hydroxychloroquine (Plaquenil) given during the patient's admission?' +
## 'Age at Admission' + Per_Capita + 'SIRS RR' + SIRS_WBC +
## SIRS...110 + 'Creatinine (if 0 = N/A)' + Ferritin + CRP +
## 'D-Domer' + 'Admission Date:' + 'Please specify: (choice=Diabetes)' +
## 'SIRS TEMP' + 'Please specify: (choice=Chronic- Hepatitis C)'
```

```
## Warning: glm.fit: fitted probabilities numerically 0 or 1 occurred
```

```
## Warning: glm.fit: fitted probabilities numerically 0 or 1 occurred
```

```
## Warning: glm.fit: fitted probabilities numerically 0 or 1 occurred
```

```
## Warning: glm.fit: fitted probabilities numerically 0 or 1 occurred
```

```
## Warning: glm.fit: fitted probabilities numerically 0 or 1 occurred
```

```
## Warning: glm.fit: fitted probabilities numerically 0 or 1 occurred
```

```
## Warning: glm.fit: fitted probabilities numerically 0 or 1 occurred
```

```
## Warning: glm.fit: fitted probabilities numerically 0 or 1 occurred
```

```
## Warning: glm.fit: fitted probabilities numerically 0 or 1 occurred
```

```
## Warning: glm.fit: fitted probabilities numerically 0 or 1 occurred
```

```
## Warning: glm.fit: fitted probabilities numerically 0 or 1 occurred
```

```
## Warning: glm.fit: fitted probabilities numerically 0 or 1 occurred
```

```
## Warning: glm.fit: fitted probabilities numerically 0 or 1 occurred
```

```
## Warning: glm.fit: fitted probabilities numerically 0 or 1 occurred
```

```
## Warning: glm.fit: fitted probabilities numerically 0 or 1 occurred
```

```
## Warning: glm.fit: fitted probabilities numerically 0 or 1 occurred
```

```
## Warning: glm.fit: fitted probabilities numerically 0 or 1 occurred
```

```
## Warning: glm.fit: fitted probabilities numerically 0 or 1 occurred
```

```
## Warning: glm.fit: fitted probabilities numerically 0 or 1 occurred
```

```
## Warning: glm.fit: fitted probabilities numerically 0 or 1 occurred
```

```
## Warning: glm.fit: fitted probabilities numerically 0 or 1 occurred
```

```
## Warning: glm.fit: fitted probabilities numerically 0 or 1 occurred
```

```
## Warning: glm.fit: fitted probabilities numerically 0 or 1 occurred
```

## Warning: glm.fit: fitted probabilities numerically 0 or 1 occurred

|                                                                                        | Df       |
|----------------------------------------------------------------------------------------|----------|
| ## - 'Please specify: (choice=Diabetes)'                                               | 1        |
| ## - 'Please specify: (choice=Asthma)'                                                 | 1        |
| ## - Per_Capita                                                                        | 1        |
| ## - 'Please specify: (choice=Cirrhosis)'                                              | 1        |
| ## - 'Please specify: (choice=Chronic Obstructive Pulmonary Disease)'                  | 1        |
| ## - 'SIRS TEMP'                                                                       | 1        |
| ## - 'Admission Date:'                                                                 | 1        |
| ## - 'Creatinine (if 0 = N/A)'                                                         | 1        |
| ## - 'D-Domer'                                                                         | 1        |
| ## - 'Does the patient have a history of cancer?'                                      | 1        |
| ## - 'Please specify: (choice=Hypertension)'                                           | 1        |
| ## - 'Please specify: (choice=Congestive Heart Failure)'                               | 1        |
| ## <none>                                                                              |          |
| ## - SIRS_WBC                                                                          | 1        |
| ## - 'Please specify: (choice=Chronic Renal Insufficiency)'                            | 1        |
| ## - SIRS...110                                                                        | 1        |
| ## - 'SIRS RR'                                                                         | 1        |
| ## - 'Insurance Class'                                                                 | 3        |
| ## - 'Please specify: (choice=Chronic- Hepatitis C)'                                   | 1        |
| ## - 'Was the patient placed in a prone position during their admission?'              | 1        |
| ## - 'COVID- Was hydroxychloroquine (Plaquenil) given during the patient's admission?' | 1        |
| ## - Ferritin                                                                          | 1        |
| ## - 'Age at Admission'                                                                | 1        |
| ## - CRP                                                                               | 1        |
| ## - 'Was plasma given to the patient during this admission?'                          | 1        |
| ## - 'Did the patient receive hemodialysis during this admission?'                     | 1        |
| ##                                                                                     | Deviance |
| ## - 'Please specify: (choice=Diabetes)'                                               | 231.64   |
| ## - 'Please specify: (choice=Asthma)'                                                 | 231.65   |
| ## - Per_Capita                                                                        | 231.68   |
| ## - 'Please specify: (choice=Cirrhosis)'                                              | 231.80   |
| ## - 'Please specify: (choice=Chronic Obstructive Pulmonary Disease)'                  | 231.91   |
| ## - 'SIRS TEMP'                                                                       | 232.00   |
| ## - 'Admission Date:'                                                                 | 232.01   |
| ## - 'Creatinine (if 0 = N/A)'                                                         | 232.15   |
| ## - 'D-Domer'                                                                         | 232.50   |
| ## - 'Does the patient have a history of cancer?'                                      | 233.08   |
| ## - 'Please specify: (choice=Hypertension)'                                           | 233.45   |
| ## - 'Please specify: (choice=Congestive Heart Failure)'                               | 233.45   |
| ## <none>                                                                              | 231.63   |
| ## - SIRS_WBC                                                                          | 234.02   |
| ## - 'Please specify: (choice=Chronic Renal Insufficiency)'                            | 234.17   |
| ## - SIRS...110                                                                        | 234.64   |
| ## - 'SIRS RR'                                                                         | 234.83   |
| ## - 'Insurance Class'                                                                 | 239.05   |
| ## - 'Please specify: (choice=Chronic- Hepatitis C)'                                   | 235.63   |
| ## - 'Was the patient placed in a prone position during their admission?'              | 238.32   |
| ## - 'COVID- Was hydroxychloroquine (Plaquenil) given during the patient's admission?' | 238.32   |
| ## - Ferritin                                                                          | 238.63   |
| ## - 'Age at Admission'                                                                | 238.73   |
| ## - CRP                                                                               | 239.34   |

```

## - 'Was plasma given to the patient during this admission?' 239.42
## - 'Did the patient receive hemodialysis during this admission?' 244.32
## AIC
## - 'Please specify: (choice=Diabetes)' 285.64
## - 'Please specify: (choice=Asthma)' 285.65
## - Per_Capita 285.68
## - 'Please specify: (choice=Cirrhosis)' 285.80
## - 'Please specify: (choice=Chronic Obstructive Pulmonary Disease)' 285.90
## - 'SIRS TEMP' 286.00
## - 'Admission Date:' 286.01
## - 'Creatinine (if 0 = N/A)' 286.15
## - 'D-Domer' 286.50
## - 'Does the patient have a history of cancer?' 287.08
## - 'Please specify: (choice=Hypertension)' 287.45
## - 'Please specify: (choice=Congestive Heart Failure)' 287.45
## <none> 287.63
## - SIRS_WBC 288.02
## - 'Please specify: (choice=Chronic Renal Insufficiency)' 288.17
## - SIRS...110 288.64
## - 'SIRS RR' 288.83
## - 'Insurance Class' 289.05
## - 'Please specify: (choice=Chronic- Hepatitis C)' 289.63
## - 'Was the patient placed in a prone position during their admission?' 292.32
## - 'COVID- Was hydroxychloroquine (Plaquenil) given during the patient's admission?' 292.32
## - Ferritin 292.63
## - 'Age at Admission' 292.73
## - CRP 293.34
## - 'Was plasma given to the patient during this admission?' 293.42
## - 'Did the patient receive hemodialysis during this admission?' 298.32

```

```
## Warning: glm.fit: fitted probabilities numerically 0 or 1 occurred
```

```
##
```

```
## Step: AIC=285.64
```

```

## death ~ 'Insurance Class' + 'Does the patient have a history of cancer?' +
##   'Please specify: (choice=Hypertension)' + 'Please specify: (choice=Congestive Heart Failure)' +
##   'Please specify: (choice=Asthma)' + 'Please specify: (choice=Chronic Obstructive Pulmonary Disease)' +
##   'Please specify: (choice=Chronic Renal Insufficiency)' +
##   'Please specify: (choice=Cirrhosis)' + 'Did the patient receive hemodialysis during this admission?' +
##   'Was plasma given to the patient during this admission?' +
##   'Was the patient placed in a prone position during their admission?' +
##   'COVID- Was hydroxychloroquine (Plaquenil) given during the patient's admission?' +
##   'Age at Admission' + Per_Capita + 'SIRS RR' + SIRS_WBC +
##   SIRS...110 + 'Creatinine (if 0 = N/A)' + Ferritin + CRP +
##   'D-Domer' + 'Admission Date:' + 'SIRS TEMP' + 'Please specify: (choice=Chronic- Hepatitis C)'

```

```
## Warning: glm.fit: fitted probabilities numerically 0 or 1 occurred
```

```
## Warning: glm.fit: fitted probabilities numerically 0 or 1 occurred
```

```
## Warning: glm.fit: fitted probabilities numerically 0 or 1 occurred
```

```
## Warning: glm.fit: fitted probabilities numerically 0 or 1 occurred
```

## Warning: glm.fit: fitted probabilities numerically 0 or 1 occurred  
## Warning: glm.fit: fitted probabilities numerically 0 or 1 occurred  
## Warning: glm.fit: fitted probabilities numerically 0 or 1 occurred  
## Warning: glm.fit: fitted probabilities numerically 0 or 1 occurred  
## Warning: glm.fit: fitted probabilities numerically 0 or 1 occurred  
## Warning: glm.fit: fitted probabilities numerically 0 or 1 occurred  
## Warning: glm.fit: fitted probabilities numerically 0 or 1 occurred  
## Warning: glm.fit: fitted probabilities numerically 0 or 1 occurred  
## Warning: glm.fit: fitted probabilities numerically 0 or 1 occurred  
## Warning: glm.fit: fitted probabilities numerically 0 or 1 occurred  
## Warning: glm.fit: fitted probabilities numerically 0 or 1 occurred  
## Warning: glm.fit: fitted probabilities numerically 0 or 1 occurred  
## Warning: glm.fit: fitted probabilities numerically 0 or 1 occurred  
## Warning: glm.fit: fitted probabilities numerically 0 or 1 occurred  
## Warning: glm.fit: fitted probabilities numerically 0 or 1 occurred  
## Warning: glm.fit: fitted probabilities numerically 0 or 1 occurred  
## Warning: glm.fit: fitted probabilities numerically 0 or 1 occurred  
## Warning: glm.fit: fitted probabilities numerically 0 or 1 occurred  
## Warning: glm.fit: fitted probabilities numerically 0 or 1 occurred  
## Warning: glm.fit: fitted probabilities numerically 0 or 1 occurred  
## Warning: glm.fit: fitted probabilities numerically 0 or 1 occurred

|                                                                       | Df |
|-----------------------------------------------------------------------|----|
| ## - 'Please specify: (choice=Asthma)'                                | 1  |
| ## - Per_Capita                                                       | 1  |
| ## - 'Please specify: (choice=Cirrhosis)'                             | 1  |
| ## - 'Please specify: (choice=Chronic Obstructive Pulmonary Disease)' | 1  |
| ## - 'SIRS TEMP'                                                      | 1  |
| ## - 'Admission Date:'                                                | 1  |
| ## - 'Creatinine (if 0 = N/A)'                                        | 1  |
| ## - 'D-Domer'                                                        | 1  |
| ## - 'Does the patient have a history of cancer?'                     | 1  |
| ## - 'Please specify: (choice=Congestive Heart Failure)'              | 1  |
| ## - 'Please specify: (choice=Hypertension)'                          | 1  |
| ## <none>                                                             |    |
| ## - SIRS_WBC                                                         | 1  |
| ## - 'Please specify: (choice=Chronic Renal Insufficiency)'           | 1  |



|                                                                                        |          |
|----------------------------------------------------------------------------------------|----------|
| ## - SIRS...110                                                                        | 1        |
| ## - 'SIRS RR'                                                                         | 1        |
| ## - 'Insurance Class'                                                                 | 3        |
| ## - 'Please specify: (choice=Chronic- Hepatitis C)'                                   | 1        |
| ## - 'Was the patient placed in a prone position during their admission?'              | 1        |
| ## - 'COVID- Was hydroxychloroquine (Plaquenil) given during the patient's admission?' | 1        |
| ## - Ferritin                                                                          | 1        |
| ## - 'Age at Admission'                                                                | 1        |
| ## - CRP                                                                               | 1        |
| ## - 'Was plasma given to the patient during this admission?'                          | 1        |
| ## - 'Did the patient receive hemodialysis during this admission?'                     | 1        |
| ##                                                                                     | Deviance |
| ## - 'Please specify: (choice=Asthma)'                                                 | 231.66   |
| ## - Per_Capita                                                                        | 231.69   |
| ## - 'Please specify: (choice=Cirrhosis)'                                              | 231.81   |
| ## - 'Please specify: (choice=Chronic Obstructive Pulmonary Disease)'                  | 231.91   |
| ## - 'SIRS TEMP'                                                                       | 232.00   |
| ## - 'Admission Date:'                                                                 | 232.02   |
| ## - 'Creatinine (if 0 = N/A)'                                                         | 232.17   |
| ## - 'D-Domer'                                                                         | 232.51   |
| ## - 'Does the patient have a history of cancer?'                                      | 233.08   |
| ## - 'Please specify: (choice=Congestive Heart Failure)'                               | 233.53   |
| ## - 'Please specify: (choice=Hypertension)'                                           | 233.61   |
| ## <none>                                                                              | 231.64   |
| ## - SIRS_WBC                                                                          | 234.04   |
| ## - 'Please specify: (choice=Chronic Renal Insufficiency)'                            | 234.21   |
| ## - SIRS...110                                                                        | 234.64   |
| ## - 'SIRS RR'                                                                         | 234.85   |
| ## - 'Insurance Class'                                                                 | 239.06   |
| ## - 'Please specify: (choice=Chronic- Hepatitis C)'                                   | 235.67   |
| ## - 'Was the patient placed in a prone position during their admission?'              | 238.32   |
| ## - 'COVID- Was hydroxychloroquine (Plaquenil) given during the patient's admission?' | 238.47   |
| ## - Ferritin                                                                          | 238.66   |
| ## - 'Age at Admission'                                                                | 238.75   |
| ## - CRP                                                                               | 239.40   |
| ## - 'Was plasma given to the patient during this admission?'                          | 239.43   |
| ## - 'Did the patient receive hemodialysis during this admission?'                     | 244.32   |
| ##                                                                                     | AIC      |
| ## - 'Please specify: (choice=Asthma)'                                                 | 283.66   |
| ## - Per_Capita                                                                        | 283.69   |
| ## - 'Please specify: (choice=Cirrhosis)'                                              | 283.81   |
| ## - 'Please specify: (choice=Chronic Obstructive Pulmonary Disease)'                  | 283.91   |
| ## - 'SIRS TEMP'                                                                       | 284.00   |
| ## - 'Admission Date:'                                                                 | 284.02   |
| ## - 'Creatinine (if 0 = N/A)'                                                         | 284.17   |
| ## - 'D-Domer'                                                                         | 284.51   |
| ## - 'Does the patient have a history of cancer?'                                      | 285.08   |
| ## - 'Please specify: (choice=Congestive Heart Failure)'                               | 285.53   |
| ## - 'Please specify: (choice=Hypertension)'                                           | 285.61   |
| ## <none>                                                                              | 285.64   |
| ## - SIRS_WBC                                                                          | 286.04   |
| ## - 'Please specify: (choice=Chronic Renal Insufficiency)'                            | 286.21   |
| ## - SIRS...110                                                                        | 286.64   |
| ## - 'SIRS RR'                                                                         | 286.85   |

```

## - 'Insurance Class' 287.06
## - 'Please specify: (choice=Chronic- Hepatitis C)' 287.67
## - 'Was the patient placed in a prone position during their admission?' 290.32
## - 'COVID- Was hydroxychloroquine (Plaquenil) given during the patient's admission?' 290.47
## - Ferritin 290.66
## - 'Age at Admission' 290.75
## - CRP 291.40
## - 'Was plasma given to the patient during this admission?' 291.43
## - 'Did the patient receive hemodialysis during this admission?' 296.32

```

```
## Warning: glm.fit: fitted probabilities numerically 0 or 1 occurred
```

```
##
```

```
## Step: AIC=283.66
```

```

## death ~ 'Insurance Class' + 'Does the patient have a history of cancer?' +
##   'Please specify: (choice=Hypertension)' + 'Please specify: (choice=Congestive Heart Failure)' +
##   'Please specify: (choice=Chronic Obstructive Pulmonary Disease)' +
##   'Please specify: (choice=Chronic Renal Insufficiency)' +
##   'Please specify: (choice=Cirrhosis)' + 'Did the patient receive hemodialysis during this admission?' +
##   'Was plasma given to the patient during this admission?' +
##   'Was the patient placed in a prone position during their admission?' +
##   'COVID- Was hydroxychloroquine (Plaquenil) given during the patient's admission?' +
##   'Age at Admission' + Per_Capita + 'SIRS RR' + SIRS_WBC +
##   SIRS...110 + 'Creatinine (if 0 = N/A)' + Ferritin + CRP +
##   'D-Domer' + 'Admission Date:' + 'SIRS TEMP' + 'Please specify: (choice=Chronic- Hepatitis C)'

```

```
## Warning: glm.fit: fitted probabilities numerically 0 or 1 occurred
```

```
## Warning: glm.fit: fitted probabilities numerically 0 or 1 occurred
```

```
## Warning: glm.fit: fitted probabilities numerically 0 or 1 occurred
```

```
## Warning: glm.fit: fitted probabilities numerically 0 or 1 occurred
```

```
## Warning: glm.fit: fitted probabilities numerically 0 or 1 occurred
```

```
## Warning: glm.fit: fitted probabilities numerically 0 or 1 occurred
```

```
## Warning: glm.fit: fitted probabilities numerically 0 or 1 occurred
```

```
## Warning: glm.fit: fitted probabilities numerically 0 or 1 occurred
```

```
## Warning: glm.fit: fitted probabilities numerically 0 or 1 occurred
```

```
## Warning: glm.fit: fitted probabilities numerically 0 or 1 occurred
```

```
## Warning: glm.fit: fitted probabilities numerically 0 or 1 occurred
```

```
## Warning: glm.fit: fitted probabilities numerically 0 or 1 occurred
```

```
## Warning: glm.fit: fitted probabilities numerically 0 or 1 occurred
```

```
## Warning: glm.fit: fitted probabilities numerically 0 or 1 occurred
```

```

## Warning: glm.fit: fitted probabilities numerically 0 or 1 occurred
## Warning: glm.fit: fitted probabilities numerically 0 or 1 occurred
## Warning: glm.fit: fitted probabilities numerically 0 or 1 occurred
## Warning: glm.fit: fitted probabilities numerically 0 or 1 occurred
## Warning: glm.fit: fitted probabilities numerically 0 or 1 occurred
## Warning: glm.fit: fitted probabilities numerically 0 or 1 occurred
## Warning: glm.fit: fitted probabilities numerically 0 or 1 occurred
## Warning: glm.fit: fitted probabilities numerically 0 or 1 occurred
## Warning: glm.fit: fitted probabilities numerically 0 or 1 occurred

```

|                                                                                        | Df       |
|----------------------------------------------------------------------------------------|----------|
| ##                                                                                     |          |
| ## - Per_Capita                                                                        | 1        |
| ## - 'Please specify: (choice=Cirrhosis)'                                              | 1        |
| ## - 'Please specify: (choice=Chronic Obstructive Pulmonary Disease)'                  | 1        |
| ## - 'SIRS TEMP'                                                                       | 1        |
| ## - 'Admission Date:'                                                                 | 1        |
| ## - 'Creatinine (if 0 = N/A)'                                                         | 1        |
| ## - 'D-Domer'                                                                         | 1        |
| ## - 'Does the patient have a history of cancer?'                                      | 1        |
| ## - 'Please specify: (choice=Hypertension)'                                           | 1        |
| ## <none>                                                                              |          |
| ## - 'Please specify: (choice=Congestive Heart Failure)'                               | 1        |
| ## - SIRS_WBC                                                                          | 1        |
| ## - 'Please specify: (choice=Chronic Renal Insufficiency)'                            | 1        |
| ## - SIRS...110                                                                        | 1        |
| ## - 'SIRS RR'                                                                         | 1        |
| ## - 'Insurance Class'                                                                 | 3        |
| ## - 'Please specify: (choice=Chronic- Hepatitis C)'                                   | 1        |
| ## - 'Was the patient placed in a prone position during their admission?'              | 1        |
| ## - 'COVID- Was hydroxychloroquine (Plaquenil) given during the patient's admission?' | 1        |
| ## - Ferritin                                                                          | 1        |
| ## - 'Age at Admission'                                                                | 1        |
| ## - CRP                                                                               | 1        |
| ## - 'Was plasma given to the patient during this admission?'                          | 1        |
| ## - 'Did the patient receive hemodialysis during this admission?'                     | 1        |
| ##                                                                                     | Deviance |
| ## - Per_Capita                                                                        | 231.71   |
| ## - 'Please specify: (choice=Cirrhosis)'                                              | 231.83   |
| ## - 'Please specify: (choice=Chronic Obstructive Pulmonary Disease)'                  | 231.93   |
| ## - 'SIRS TEMP'                                                                       | 232.03   |
| ## - 'Admission Date:'                                                                 | 232.04   |
| ## - 'Creatinine (if 0 = N/A)'                                                         | 232.20   |
| ## - 'D-Domer'                                                                         | 232.53   |
| ## - 'Does the patient have a history of cancer?'                                      | 233.12   |
| ## - 'Please specify: (choice=Hypertension)'                                           | 233.65   |
| ## <none>                                                                              | 231.66   |
| ## - 'Please specify: (choice=Congestive Heart Failure)'                               | 233.77   |

```

## - SIRS_WBC 234.06
## - 'Please specify: (choice=Chronic Renal Insufficiency)' 234.24
## - SIRS...110 234.66
## - 'SIRS RR' 234.89
## - 'Insurance Class' 239.07
## - 'Please specify: (choice=Chronic- Hepatitis C)' 235.69
## - 'Was the patient placed in a prone position during their admission?' 238.35
## - 'COVID- Was hydroxychloroquine (Plaquenil) given during the patient's admission?' 238.47
## - Ferritin 238.66
## - 'Age at Admission' 238.81
## - CRP 239.40
## - 'Was plasma given to the patient during this admission?' 239.43
## - 'Did the patient receive hemodialysis during this admission?' 244.34
## AIC
## - Per_Capita 281.71
## - 'Please specify: (choice=Cirrhosis)' 281.83
## - 'Please specify: (choice=Chronic Obstructive Pulmonary Disease)' 281.93
## - 'SIRS TEMP' 282.03
## - 'Admission Date:' 282.04
## - 'Creatinine (if 0 = N/A)' 282.20
## - 'D-Domer' 282.53
## - 'Does the patient have a history of cancer?' 283.12
## - 'Please specify: (choice=Hypertension)' 283.65
## <none> 283.66
## - 'Please specify: (choice=Congestive Heart Failure)' 283.77
## - SIRS_WBC 284.06
## - 'Please specify: (choice=Chronic Renal Insufficiency)' 284.24
## - SIRS...110 284.66
## - 'SIRS RR' 284.89
## - 'Insurance Class' 285.07
## - 'Please specify: (choice=Chronic- Hepatitis C)' 285.69
## - 'Was the patient placed in a prone position during their admission?' 288.35
## - 'COVID- Was hydroxychloroquine (Plaquenil) given during the patient's admission?' 288.48
## - Ferritin 288.66
## - 'Age at Admission' 288.81
## - CRP 289.40
## - 'Was plasma given to the patient during this admission?' 289.43
## - 'Did the patient receive hemodialysis during this admission?' 294.34

```

```
## Warning: glm.fit: fitted probabilities numerically 0 or 1 occurred
```

```
##
```

```
## Step: AIC=281.71
```

```

## death ~ 'Insurance Class' + 'Does the patient have a history of cancer?' +
## 'Please specify: (choice=Hypertension)' + 'Please specify: (choice=Congestive Heart Failure)' +
## 'Please specify: (choice=Chronic Obstructive Pulmonary Disease)' +
## 'Please specify: (choice=Chronic Renal Insufficiency)' +
## 'Please specify: (choice=Cirrhosis)' + 'Did the patient receive hemodialysis during this admission?' +
## 'Was plasma given to the patient during this admission?' +
## 'Was the patient placed in a prone position during their admission?' +
## 'COVID- Was hydroxychloroquine (Plaquenil) given during the patient's admission?' +
## 'Age at Admission' + 'SIRS RR' + SIRS_WBC + SIRS...110 +
## 'Creatinine (if 0 = N/A)' + Ferritin + CRP + 'D-Domer' +
## 'Admission Date:' + 'SIRS TEMP' + 'Please specify: (choice=Chronic- Hepatitis C)'

```

```

## Warning: glm.fit: fitted probabilities numerically 0 or 1 occurred
## Warning: glm.fit: fitted probabilities numerically 0 or 1 occurred
## Warning: glm.fit: fitted probabilities numerically 0 or 1 occurred
## Warning: glm.fit: fitted probabilities numerically 0 or 1 occurred
## Warning: glm.fit: fitted probabilities numerically 0 or 1 occurred
## Warning: glm.fit: fitted probabilities numerically 0 or 1 occurred
## Warning: glm.fit: fitted probabilities numerically 0 or 1 occurred
## Warning: glm.fit: fitted probabilities numerically 0 or 1 occurred
## Warning: glm.fit: fitted probabilities numerically 0 or 1 occurred
## Warning: glm.fit: fitted probabilities numerically 0 or 1 occurred
## Warning: glm.fit: fitted probabilities numerically 0 or 1 occurred
## Warning: glm.fit: fitted probabilities numerically 0 or 1 occurred
## Warning: glm.fit: fitted probabilities numerically 0 or 1 occurred
## Warning: glm.fit: fitted probabilities numerically 0 or 1 occurred
## Warning: glm.fit: fitted probabilities numerically 0 or 1 occurred
## Warning: glm.fit: fitted probabilities numerically 0 or 1 occurred
## Warning: glm.fit: fitted probabilities numerically 0 or 1 occurred
## Warning: glm.fit: fitted probabilities numerically 0 or 1 occurred
## Warning: glm.fit: fitted probabilities numerically 0 or 1 occurred
## Warning: glm.fit: fitted probabilities numerically 0 or 1 occurred
## Warning: glm.fit: fitted probabilities numerically 0 or 1 occurred
## Warning: glm.fit: fitted probabilities numerically 0 or 1 occurred
## Warning: glm.fit: fitted probabilities numerically 0 or 1 occurred
## Warning: glm.fit: fitted probabilities numerically 0 or 1 occurred

##                                     Df
## - 'Please specify: (choice=Cirrhosis)‘   1
## - 'Please specify: (choice=Chronic Obstructive Pulmonary Disease)‘   1
## - 'SIRS TEMP‘                             1
## - 'Admission Date:'                       1
## - 'Creatinine (if 0 = N/A)‘               1
## - 'D-Domer‘                               1
## - 'Does the patient have a history of cancer?‘   1
## <none>
## - 'Please specify: (choice=Hypertension)‘   1
## - 'Please specify: (choice=Congestive Heart Failure)‘   1
## - SIRS_WBC                                 1

```

|                                                                                        |          |
|----------------------------------------------------------------------------------------|----------|
| ## - 'Please specify: (choice=Chronic Renal Insufficiency)'                            | 1        |
| ## - SIRS...110                                                                        | 1        |
| ## - 'SIRS RR'                                                                         | 1        |
| ## - 'Insurance Class'                                                                 | 3        |
| ## - 'Please specify: (choice=Chronic- Hepatitis C)'                                   | 1        |
| ## - 'Was the patient placed in a prone position during their admission?'              | 1        |
| ## - 'COVID- Was hydroxychloroquine (Plaquenil) given during the patient's admission?' | 1        |
| ## - Ferritin                                                                          | 1        |
| ## - 'Age at Admission'                                                                | 1        |
| ## - 'Was plasma given to the patient during this admission?'                          | 1        |
| ## - CRP                                                                               | 1        |
| ## - 'Did the patient receive hemodialysis during this admission?'                     | 1        |
| ##                                                                                     | Deviance |
| ## - 'Please specify: (choice=Cirrhosis)'                                              | 231.88   |
| ## - 'Please specify: (choice=Chronic Obstructive Pulmonary Disease)'                  | 231.97   |
| ## - 'SIRS TEMP'                                                                       | 232.07   |
| ## - 'Admission Date:'                                                                 | 232.10   |
| ## - 'Creatinine (if 0 = N/A)'                                                         | 232.25   |
| ## - 'D-Domer'                                                                         | 232.54   |
| ## - 'Does the patient have a history of cancer?'                                      | 233.17   |
| ## <none>                                                                              | 231.71   |
| ## - 'Please specify: (choice=Hypertension)'                                           | 233.71   |
| ## - 'Please specify: (choice=Congestive Heart Failure)'                               | 233.78   |
| ## - SIRS_WBC                                                                          | 234.09   |
| ## - 'Please specify: (choice=Chronic Renal Insufficiency)'                            | 234.35   |
| ## - SIRS...110                                                                        | 234.66   |
| ## - 'SIRS RR'                                                                         | 234.94   |
| ## - 'Insurance Class'                                                                 | 239.07   |
| ## - 'Please specify: (choice=Chronic- Hepatitis C)'                                   | 235.69   |
| ## - 'Was the patient placed in a prone position during their admission?'              | 238.40   |
| ## - 'COVID- Was hydroxychloroquine (Plaquenil) given during the patient's admission?' | 238.48   |
| ## - Ferritin                                                                          | 238.67   |
| ## - 'Age at Admission'                                                                | 239.24   |
| ## - 'Was plasma given to the patient during this admission?'                          | 239.44   |
| ## - CRP                                                                               | 239.46   |
| ## - 'Did the patient receive hemodialysis during this admission?'                     | 244.59   |
| ##                                                                                     | AIC      |
| ## - 'Please specify: (choice=Cirrhosis)'                                              | 279.88   |
| ## - 'Please specify: (choice=Chronic Obstructive Pulmonary Disease)'                  | 279.97   |
| ## - 'SIRS TEMP'                                                                       | 280.07   |
| ## - 'Admission Date:'                                                                 | 280.10   |
| ## - 'Creatinine (if 0 = N/A)'                                                         | 280.25   |
| ## - 'D-Domer'                                                                         | 280.54   |
| ## - 'Does the patient have a history of cancer?'                                      | 281.17   |
| ## <none>                                                                              | 281.71   |
| ## - 'Please specify: (choice=Hypertension)'                                           | 281.71   |
| ## - 'Please specify: (choice=Congestive Heart Failure)'                               | 281.78   |
| ## - SIRS_WBC                                                                          | 282.09   |
| ## - 'Please specify: (choice=Chronic Renal Insufficiency)'                            | 282.35   |
| ## - SIRS...110                                                                        | 282.66   |
| ## - 'SIRS RR'                                                                         | 282.94   |
| ## - 'Insurance Class'                                                                 | 283.07   |
| ## - 'Please specify: (choice=Chronic- Hepatitis C)'                                   | 283.69   |
| ## - 'Was the patient placed in a prone position during their admission?'              | 286.40   |

```

## - 'COVID- Was hydroxychloroquine (Plaquenil) given during the patient's admission?' 286.48
## - Ferritin 286.67
## - 'Age at Admission' 287.24
## - 'Was plasma given to the patient during this admission?' 287.44
## - CRP 287.46
## - 'Did the patient receive hemodialysis during this admission?' 292.59

## Warning: glm.fit: fitted probabilities numerically 0 or 1 occurred

##
## Step: AIC=279.88
## death ~ 'Insurance Class' + 'Does the patient have a history of cancer?' +
## 'Please specify: (choice=Hypertension)' + 'Please specify: (choice=Congestive Heart Failure)' +
## 'Please specify: (choice=Chronic Obstructive Pulmonary Disease)' +
## 'Please specify: (choice=Chronic Renal Insufficiency)' +
## 'Did the patient receive hemodialysis during this admission?' +
## 'Was plasma given to the patient during this admission?' +
## 'Was the patient placed in a prone position during their admission?' +
## 'COVID- Was hydroxychloroquine (Plaquenil) given during the patient's admission?' +
## 'Age at Admission' + 'SIRS RR' + SIRS_WBC + SIRS...110 +
## 'Creatinine (if 0 = N/A)' + Ferritin + CRP + 'D-Domer' +
## 'Admission Date:' + 'SIRS TEMP' + 'Please specify: (choice=Chronic- Hepatitis C)'

## Warning: glm.fit: fitted probabilities numerically 0 or 1 occurred
## Warning: glm.fit: fitted probabilities numerically 0 or 1 occurred
## Warning: glm.fit: fitted probabilities numerically 0 or 1 occurred
## Warning: glm.fit: fitted probabilities numerically 0 or 1 occurred
## Warning: glm.fit: fitted probabilities numerically 0 or 1 occurred
## Warning: glm.fit: fitted probabilities numerically 0 or 1 occurred
## Warning: glm.fit: fitted probabilities numerically 0 or 1 occurred
## Warning: glm.fit: fitted probabilities numerically 0 or 1 occurred
## Warning: glm.fit: fitted probabilities numerically 0 or 1 occurred
## Warning: glm.fit: fitted probabilities numerically 0 or 1 occurred
## Warning: glm.fit: fitted probabilities numerically 0 or 1 occurred
## Warning: glm.fit: fitted probabilities numerically 0 or 1 occurred
## Warning: glm.fit: fitted probabilities numerically 0 or 1 occurred
## Warning: glm.fit: fitted probabilities numerically 0 or 1 occurred
## Warning: glm.fit: fitted probabilities numerically 0 or 1 occurred
## Warning: glm.fit: fitted probabilities numerically 0 or 1 occurred
## Warning: glm.fit: fitted probabilities numerically 0 or 1 occurred

```

```
## Warning: glm.fit: fitted probabilities numerically 0 or 1 occurred
## Warning: glm.fit: fitted probabilities numerically 0 or 1 occurred
## Warning: glm.fit: fitted probabilities numerically 0 or 1 occurred
## Warning: glm.fit: fitted probabilities numerically 0 or 1 occurred
## Warning: glm.fit: fitted probabilities numerically 0 or 1 occurred
```

|                                                                                        | Df       |
|----------------------------------------------------------------------------------------|----------|
| ## - 'Please specify: (choice=Chronic Obstructive Pulmonary Disease)'                  | 1        |
| ## - 'SIRS TEMP'                                                                       | 1        |
| ## - 'Admission Date:'                                                                 | 1        |
| ## - 'Creatinine (if 0 = N/A)'                                                         | 1        |
| ## - 'D-Domer'                                                                         | 1        |
| ## - 'Does the patient have a history of cancer?'                                      | 1        |
| ## - 'Please specify: (choice=Hypertension)'                                           | 1        |
| ## <none>                                                                              |          |
| ## - 'Please specify: (choice=Congestive Heart Failure)'                               | 1        |
| ## - SIRS_WBC                                                                          | 1        |
| ## - 'Please specify: (choice=Chronic Renal Insufficiency)'                            | 1        |
| ## - SIRS...110                                                                        | 1        |
| ## - 'SIRS RR'                                                                         | 1        |
| ## - 'Insurance Class'                                                                 | 3        |
| ## - 'Please specify: (choice=Chronic- Hepatitis C)'                                   | 1        |
| ## - 'Was the patient placed in a prone position during their admission?'              | 1        |
| ## - 'COVID- Was hydroxychloroquine (Plaquenil) given during the patient's admission?' | 1        |
| ## - Ferritin                                                                          | 1        |
| ## - 'Age at Admission'                                                                | 1        |
| ## - 'Was plasma given to the patient during this admission?'                          | 1        |
| ## - CRP                                                                               | 1        |
| ## - 'Did the patient receive hemodialysis during this admission?'                     | 1        |
| ##                                                                                     | Deviance |
| ## - 'Please specify: (choice=Chronic Obstructive Pulmonary Disease)'                  | 232.13   |
| ## - 'SIRS TEMP'                                                                       | 232.25   |
| ## - 'Admission Date:'                                                                 | 232.29   |
| ## - 'Creatinine (if 0 = N/A)'                                                         | 232.45   |
| ## - 'D-Domer'                                                                         | 232.73   |
| ## - 'Does the patient have a history of cancer?'                                      | 233.38   |
| ## - 'Please specify: (choice=Hypertension)'                                           | 233.87   |
| ## <none>                                                                              | 231.88   |
| ## - 'Please specify: (choice=Congestive Heart Failure)'                               | 233.99   |
| ## - SIRS_WBC                                                                          | 234.21   |
| ## - 'Please specify: (choice=Chronic Renal Insufficiency)'                            | 234.55   |
| ## - SIRS...110                                                                        | 234.84   |
| ## - 'SIRS RR'                                                                         | 235.08   |
| ## - 'Insurance Class'                                                                 | 239.25   |
| ## - 'Please specify: (choice=Chronic- Hepatitis C)'                                   | 236.66   |
| ## - 'Was the patient placed in a prone position during their admission?'              | 238.57   |
| ## - 'COVID- Was hydroxychloroquine (Plaquenil) given during the patient's admission?' | 238.65   |
| ## - Ferritin                                                                          | 238.94   |
| ## - 'Age at Admission'                                                                | 239.37   |
| ## - 'Was plasma given to the patient during this admission?'                          | 239.68   |



```

## - CRP 239.70
## - 'Did the patient receive hemodialysis during this admission?' 244.76
## AIC
## - 'Please specify: (choice=Chronic Obstructive Pulmonary Disease)' 278.13
## - 'SIRS TEMP' 278.25
## - 'Admission Date:' 278.29
## - 'Creatinine (if 0 = N/A)' 278.45
## - 'D-Domer' 278.73
## - 'Does the patient have a history of cancer?' 279.38
## - 'Please specify: (choice=Hypertension)' 279.87
## <none> 279.88
## - 'Please specify: (choice=Congestive Heart Failure)' 279.99
## - SIRS_WBC 280.21
## - 'Please specify: (choice=Chronic Renal Insufficiency)' 280.55
## - SIRS...110 280.84
## - 'SIRS RR' 281.08
## - 'Insurance Class' 281.25
## - 'Please specify: (choice=Chronic- Hepatitis C)' 282.66
## - 'Was the patient placed in a prone position during their admission?' 284.57
## - 'COVID- Was hydroxychloroquine (Plaquenil) given during the patient's admission?' 284.65
## - Ferritin 284.94
## - 'Age at Admission' 285.37
## - 'Was plasma given to the patient during this admission?' 285.68
## - CRP 285.70
## - 'Did the patient receive hemodialysis during this admission?' 290.76

```

```
## Warning: glm.fit: fitted probabilities numerically 0 or 1 occurred
```

```

##
## Step: AIC=278.13
## death ~ 'Insurance Class' + 'Does the patient have a history of cancer?' +
## 'Please specify: (choice=Hypertension)' + 'Please specify: (choice=Congestive Heart Failure)' +
## 'Please specify: (choice=Chronic Renal Insufficiency)' +
## 'Did the patient receive hemodialysis during this admission?' +
## 'Was plasma given to the patient during this admission?' +
## 'Was the patient placed in a prone position during their admission?' +
## 'COVID- Was hydroxychloroquine (Plaquenil) given during the patient's admission?' +
## 'Age at Admission' + 'SIRS RR' + SIRS_WBC + SIRS...110 +
## 'Creatinine (if 0 = N/A)' + Ferritin + CRP + 'D-Domer' +
## 'Admission Date:' + 'SIRS TEMP' + 'Please specify: (choice=Chronic- Hepatitis C)'

```

```
## Warning: glm.fit: fitted probabilities numerically 0 or 1 occurred
```

```
## Warning: glm.fit: fitted probabilities numerically 0 or 1 occurred
```

```
## Warning: glm.fit: fitted probabilities numerically 0 or 1 occurred
```

```
## Warning: glm.fit: fitted probabilities numerically 0 or 1 occurred
```

```
## Warning: glm.fit: fitted probabilities numerically 0 or 1 occurred
```

```
## Warning: glm.fit: fitted probabilities numerically 0 or 1 occurred
```

```

## Warning: glm.fit: fitted probabilities numerically 0 or 1 occurred
## Warning: glm.fit: fitted probabilities numerically 0 or 1 occurred
## Warning: glm.fit: fitted probabilities numerically 0 or 1 occurred
## Warning: glm.fit: fitted probabilities numerically 0 or 1 occurred
## Warning: glm.fit: fitted probabilities numerically 0 or 1 occurred
## Warning: glm.fit: fitted probabilities numerically 0 or 1 occurred
## Warning: glm.fit: fitted probabilities numerically 0 or 1 occurred
## Warning: glm.fit: fitted probabilities numerically 0 or 1 occurred
## Warning: glm.fit: fitted probabilities numerically 0 or 1 occurred
## Warning: glm.fit: fitted probabilities numerically 0 or 1 occurred
## Warning: glm.fit: fitted probabilities numerically 0 or 1 occurred
## Warning: glm.fit: fitted probabilities numerically 0 or 1 occurred
## Warning: glm.fit: fitted probabilities numerically 0 or 1 occurred
## Warning: glm.fit: fitted probabilities numerically 0 or 1 occurred
## Warning: glm.fit: fitted probabilities numerically 0 or 1 occurred

```

|                                                                                        | Df       |
|----------------------------------------------------------------------------------------|----------|
| ## - 'SIRS TEMP'                                                                       | 1        |
| ## - 'Admission Date:'                                                                 | 1        |
| ## - 'Creatinine (if 0 = N/A)'                                                         | 1        |
| ## - 'D-Domer'                                                                         | 1        |
| ## - 'Does the patient have a history of cancer?'                                      | 1        |
| ## - 'Please specify: (choice=Hypertension)'                                           | 1        |
| ## - 'Please specify: (choice=Congestive Heart Failure)'                               | 1        |
| ## <none>                                                                              |          |
| ## - SIRS_WBC                                                                          | 1        |
| ## - 'Please specify: (choice=Chronic Renal Insufficiency)'                            | 1        |
| ## - SIRS...110                                                                        | 1        |
| ## - 'SIRS RR'                                                                         | 1        |
| ## - 'Insurance Class'                                                                 | 3        |
| ## - 'Please specify: (choice=Chronic- Hepatitis C)'                                   | 1        |
| ## - 'COVID- Was hydroxychloroquine (Plaquenil) given during the patient's admission?' | 1        |
| ## - 'Was the patient placed in a prone position during their admission?'              | 1        |
| ## - Ferritin                                                                          | 1        |
| ## - 'Age at Admission'                                                                | 1        |
| ## - 'Was plasma given to the patient during this admission?'                          | 1        |
| ## - CRP                                                                               | 1        |
| ## - 'Did the patient receive hemodialysis during this admission?'                     | 1        |
| ##                                                                                     | Deviance |
| ## - 'SIRS TEMP'                                                                       | 232.45   |
| ## - 'Admission Date:'                                                                 | 232.54   |
| ## - 'Creatinine (if 0 = N/A)'                                                         | 232.75   |
| ## - 'D-Domer'                                                                         | 233.08   |
| ## - 'Does the patient have a history of cancer?'                                      | 233.72   |

```

## - 'Please specify: (choice=Hypertension)' 234.12
## - 'Please specify: (choice=Congestive Heart Failure)' 234.12
## <none> 232.13
## - SIRS_WBC 234.25
## - 'Please specify: (choice=Chronic Renal Insufficiency)' 234.63
## - SIRS...110 234.90
## - 'SIRS RR' 235.13
## - 'Insurance Class' 239.45
## - 'Please specify: (choice=Chronic- Hepatitis C)' 236.85
## - 'COVID- Was hydroxychloroquine (Plaquenil) given during the patient's admission?' 238.80
## - 'Was the patient placed in a prone position during their admission?' 238.83
## - Ferritin 239.33
## - 'Age at Admission' 239.45
## - 'Was plasma given to the patient during this admission?' 239.82
## - CRP 240.22
## - 'Did the patient receive hemodialysis during this admission?' 245.27
## AIC
## - 'SIRS TEMP' 276.45
## - 'Admission Date:' 276.55
## - 'Creatinine (if 0 = N/A)' 276.75
## - 'D-Domer' 277.08
## - 'Does the patient have a history of cancer?' 277.72
## - 'Please specify: (choice=Hypertension)' 278.12
## - 'Please specify: (choice=Congestive Heart Failure)' 278.12
## <none> 278.13
## - SIRS_WBC 278.25
## - 'Please specify: (choice=Chronic Renal Insufficiency)' 278.63
## - SIRS...110 278.90
## - 'SIRS RR' 279.13
## - 'Insurance Class' 279.45
## - 'Please specify: (choice=Chronic- Hepatitis C)' 280.85
## - 'COVID- Was hydroxychloroquine (Plaquenil) given during the patient's admission?' 282.80
## - 'Was the patient placed in a prone position during their admission?' 282.83
## - Ferritin 283.33
## - 'Age at Admission' 283.45
## - 'Was plasma given to the patient during this admission?' 283.82
## - CRP 284.22
## - 'Did the patient receive hemodialysis during this admission?' 289.27

```

```
## Warning: glm.fit: fitted probabilities numerically 0 or 1 occurred
```

```

##
## Step: AIC=276.45
## death ~ 'Insurance Class' + 'Does the patient have a history of cancer?' +
## 'Please specify: (choice=Hypertension)' + 'Please specify: (choice=Congestive Heart Failure)' +
## 'Please specify: (choice=Chronic Renal Insufficiency)' +
## 'Did the patient receive hemodialysis during this admission?' +
## 'Was plasma given to the patient during this admission?' +
## 'Was the patient placed in a prone position during their admission?' +
## 'COVID- Was hydroxychloroquine (Plaquenil) given during the patient's admission?' +
## 'Age at Admission' + 'SIRS RR' + SIRS_WBC + SIRS...110 +
## 'Creatinine (if 0 = N/A)' + Ferritin + CRP + 'D-Domer' +
## 'Admission Date:' + 'Please specify: (choice=Chronic- Hepatitis C)'

```

```

## Warning: glm.fit: fitted probabilities numerically 0 or 1 occurred
## Warning: glm.fit: fitted probabilities numerically 0 or 1 occurred
## Warning: glm.fit: fitted probabilities numerically 0 or 1 occurred
## Warning: glm.fit: fitted probabilities numerically 0 or 1 occurred
## Warning: glm.fit: fitted probabilities numerically 0 or 1 occurred
## Warning: glm.fit: fitted probabilities numerically 0 or 1 occurred
## Warning: glm.fit: fitted probabilities numerically 0 or 1 occurred
## Warning: glm.fit: fitted probabilities numerically 0 or 1 occurred
## Warning: glm.fit: fitted probabilities numerically 0 or 1 occurred
## Warning: glm.fit: fitted probabilities numerically 0 or 1 occurred
## Warning: glm.fit: fitted probabilities numerically 0 or 1 occurred
## Warning: glm.fit: fitted probabilities numerically 0 or 1 occurred
## Warning: glm.fit: fitted probabilities numerically 0 or 1 occurred
## Warning: glm.fit: fitted probabilities numerically 0 or 1 occurred
## Warning: glm.fit: fitted probabilities numerically 0 or 1 occurred
## Warning: glm.fit: fitted probabilities numerically 0 or 1 occurred
## Warning: glm.fit: fitted probabilities numerically 0 or 1 occurred
## Warning: glm.fit: fitted probabilities numerically 0 or 1 occurred
## Warning: glm.fit: fitted probabilities numerically 0 or 1 occurred
## Warning: glm.fit: fitted probabilities numerically 0 or 1 occurred
## Warning: glm.fit: fitted probabilities numerically 0 or 1 occurred

```

```

##
## - 'Admission Date:' 1
## - 'Creatinine (if 0 = N/A)' 1
## - 'D-Domer' 1
## - 'Does the patient have a history of cancer?' 1
## - SIRS_WBC 1
## - 'Please specify: (choice=Congestive Heart Failure)' 1
## <none>
## - 'Please specify: (choice=Hypertension)' 1
## - 'Please specify: (choice=Chronic Renal Insufficiency)' 1
## - 'SIRS RR' 1
## - SIRS...110 1
## - 'Insurance Class' 3
## - 'Please specify: (choice=Chronic- Hepatitis C)' 1
## - 'Was the patient placed in a prone position during their admission?' 1
## - 'COVID- Was hydroxychloroquine (Plaquenil) given during the patient's admission?' 1
## - Ferritin 1
## - 'Age at Admission' 1

```

```

## - 'Was plasma given to the patient during this admission?' 1
## - CRP 1
## - 'Did the patient receive hemodialysis during this admission?' 1
## Deviance
## - 'Admission Date:' 232.91
## - 'Creatinine (if 0 = N/A)' 233.00
## - 'D-Domer' 233.25
## - 'Does the patient have a history of cancer?' 234.06
## - SIRS_WBC 234.28
## - 'Please specify: (choice=Congestive Heart Failure)' 234.32
## <none> 232.45
## - 'Please specify: (choice=Hypertension)' 234.51
## - 'Please specify: (choice=Chronic Renal Insufficiency)' 234.98
## - 'SIRS RR' 235.13
## - SIRS...110 235.19
## - 'Insurance Class' 239.53
## - 'Please specify: (choice=Chronic- Hepatitis C)' 237.07
## - 'Was the patient placed in a prone position during their admission?' 239.02
## - 'COVID- Was hydroxychloroquine (Plaquenil) given during the patient's admission?' 239.27
## - Ferritin 239.64
## - 'Age at Admission' 239.99
## - 'Was plasma given to the patient during this admission?' 240.12
## - CRP 240.68
## - 'Did the patient receive hemodialysis during this admission?' 245.37
## AIC
## - 'Admission Date:' 274.92
## - 'Creatinine (if 0 = N/A)' 275.00
## - 'D-Domer' 275.25
## - 'Does the patient have a history of cancer?' 276.06
## - SIRS_WBC 276.27
## - 'Please specify: (choice=Congestive Heart Failure)' 276.32
## <none> 276.45
## - 'Please specify: (choice=Hypertension)' 276.51
## - 'Please specify: (choice=Chronic Renal Insufficiency)' 276.98
## - 'SIRS RR' 277.13
## - SIRS...110 277.19
## - 'Insurance Class' 277.54
## - 'Please specify: (choice=Chronic- Hepatitis C)' 279.07
## - 'Was the patient placed in a prone position during their admission?' 281.02
## - 'COVID- Was hydroxychloroquine (Plaquenil) given during the patient's admission?' 281.27
## - Ferritin 281.64
## - 'Age at Admission' 281.99
## - 'Was plasma given to the patient during this admission?' 282.12
## - CRP 282.68
## - 'Did the patient receive hemodialysis during this admission?' 287.37

```

```
## Warning: glm.fit: fitted probabilities numerically 0 or 1 occurred
```

```

##
## Step: AIC=274.91
## death ~ 'Insurance Class' + 'Does the patient have a history of cancer?' +
## 'Please specify: (choice=Hypertension)' + 'Please specify: (choice=Congestive Heart Failure)' +
## 'Please specify: (choice=Chronic Renal Insufficiency)' +
## 'Did the patient receive hemodialysis during this admission?' +

```

```

## 'Was plasma given to the patient during this admission?' +
## 'Was the patient placed in a prone position during their admission?' +
## 'COVID- Was hydroxychloroquine (Plaquenil) given during the patient's admission?' +
## 'Age at Admission' + 'SIRS RR' + SIRS_WBC + SIRS...110 +
## 'Creatinine (if 0 = N/A)' + Ferritin + CRP + 'D-Domer' +
## 'Please specify: (choice=Chronic- Hepatitis C)'

```

```
## Warning: glm.fit: fitted probabilities numerically 0 or 1 occurred
```

```
## Warning: glm.fit: fitted probabilities numerically 0 or 1 occurred
```

```
## Warning: glm.fit: fitted probabilities numerically 0 or 1 occurred
```

```
## Warning: glm.fit: fitted probabilities numerically 0 or 1 occurred
```

```
## Warning: glm.fit: fitted probabilities numerically 0 or 1 occurred
```

```
## Warning: glm.fit: fitted probabilities numerically 0 or 1 occurred
```

```
## Warning: glm.fit: fitted probabilities numerically 0 or 1 occurred
```

```
## Warning: glm.fit: fitted probabilities numerically 0 or 1 occurred
```

```
## Warning: glm.fit: fitted probabilities numerically 0 or 1 occurred
```

```
## Warning: glm.fit: fitted probabilities numerically 0 or 1 occurred
```

```
## Warning: glm.fit: fitted probabilities numerically 0 or 1 occurred
```

```
## Warning: glm.fit: fitted probabilities numerically 0 or 1 occurred
```

```
## Warning: glm.fit: fitted probabilities numerically 0 or 1 occurred
```

```
## Warning: glm.fit: fitted probabilities numerically 0 or 1 occurred
```

```
## Warning: glm.fit: fitted probabilities numerically 0 or 1 occurred
```

```
## Warning: glm.fit: fitted probabilities numerically 0 or 1 occurred
```

```
## Warning: glm.fit: fitted probabilities numerically 0 or 1 occurred
```

```

##
## - 'Creatinine (if 0 = N/A)' 1
## - 'D-Domer' 1
## - 'Does the patient have a history of cancer?' 1
## - 'Please specify: (choice=Congestive Heart Failure)' 1
## <none>
## - SIRS_WBC 1
## - 'Please specify: (choice=Chronic Renal Insufficiency)' 1
## - 'Please specify: (choice=Hypertension)' 1
## - 'SIRS RR' 1
## - SIRS...110 1
## - 'Insurance Class' 3
## - 'Please specify: (choice=Chronic- Hepatitis C)' 1

```

```

## - 'Was the patient placed in a prone position during their admission?' 1
## - 'Was plasma given to the patient during this admission?' 1
## - 'Age at Admission' 1
## - Ferritin 1
## - CRP 1
## - 'COVID- Was hydroxychloroquine (Plaquenil) given during the patient's admission?' 1
## - 'Did the patient receive hemodialysis during this admission?' 1
## Deviance
## - 'Creatinine (if 0 = N/A)' 233.50
## - 'D-Domer' 233.73
## - 'Does the patient have a history of cancer?' 234.51
## - 'Please specify: (choice=Congestive Heart Failure)' 234.63
## <none> 232.91
## - SIRS_WBC 234.98
## - 'Please specify: (choice=Chronic Renal Insufficiency)' 235.26
## - 'Please specify: (choice=Hypertension)' 235.48
## - 'SIRS RR' 235.87
## - SIRS...110 235.88
## - 'Insurance Class' 240.16
## - 'Please specify: (choice=Chronic- Hepatitis C)' 237.38
## - 'Was the patient placed in a prone position during their admission?' 239.44
## - 'Was plasma given to the patient during this admission?' 240.12
## - 'Age at Admission' 240.28
## - Ferritin 240.60
## - CRP 241.31
## - 'COVID- Was hydroxychloroquine (Plaquenil) given during the patient's admission?' 243.30
## - 'Did the patient receive hemodialysis during this admission?' 247.27
## AIC
## - 'Creatinine (if 0 = N/A)' 273.50
## - 'D-Domer' 273.73
## - 'Does the patient have a history of cancer?' 274.51
## - 'Please specify: (choice=Congestive Heart Failure)' 274.63
## <none> 274.92
## - SIRS_WBC 274.98
## - 'Please specify: (choice=Chronic Renal Insufficiency)' 275.26
## - 'Please specify: (choice=Hypertension)' 275.48
## - 'SIRS RR' 275.87
## - SIRS...110 275.88
## - 'Insurance Class' 276.16
## - 'Please specify: (choice=Chronic- Hepatitis C)' 277.38
## - 'Was the patient placed in a prone position during their admission?' 279.44
## - 'Was plasma given to the patient during this admission?' 280.12
## - 'Age at Admission' 280.28
## - Ferritin 280.60
## - CRP 281.31
## - 'COVID- Was hydroxychloroquine (Plaquenil) given during the patient's admission?' 283.30
## - 'Did the patient receive hemodialysis during this admission?' 287.27

```

```
## Warning: glm.fit: fitted probabilities numerically 0 or 1 occurred
```

```
##
```

```
## Step: AIC=273.5
```

```
## death ~ 'Insurance Class' + 'Does the patient have a history of cancer?' +
```

```
## 'Please specify: (choice=Hypertension)' + 'Please specify: (choice=Congestive Heart Failure)' +
```

```
## 'Please specify: (choice=Chronic Renal Insufficiency)' +
## 'Did the patient receive hemodialysis during this admission?' +
## 'Was plasma given to the patient during this admission?' +
## 'Was the patient placed in a prone position during their admission?' +
## 'COVID- Was hydroxychloroquine (Plaquenil) given during the patient's admission?' +
## 'Age at Admission' + 'SIRS RR' + SIRS_WBC + SIRS...110 +
## Ferritin + CRP + 'D-Domer' + 'Please specify: (choice=Chronic- Hepatitis C)'
```

```
## Warning: glm.fit: fitted probabilities numerically 0 or 1 occurred
```

```
## Warning: glm.fit: fitted probabilities numerically 0 or 1 occurred
```

```
## Warning: glm.fit: fitted probabilities numerically 0 or 1 occurred
```

```
## Warning: glm.fit: fitted probabilities numerically 0 or 1 occurred
```

```
## Warning: glm.fit: fitted probabilities numerically 0 or 1 occurred
```

```
## Warning: glm.fit: fitted probabilities numerically 0 or 1 occurred
```

```
## Warning: glm.fit: fitted probabilities numerically 0 or 1 occurred
```

```
## Warning: glm.fit: fitted probabilities numerically 0 or 1 occurred
```

```
## Warning: glm.fit: fitted probabilities numerically 0 or 1 occurred
```

```
## Warning: glm.fit: fitted probabilities numerically 0 or 1 occurred
```

```
## Warning: glm.fit: fitted probabilities numerically 0 or 1 occurred
```

```
## Warning: glm.fit: fitted probabilities numerically 0 or 1 occurred
```

```
## Warning: glm.fit: fitted probabilities numerically 0 or 1 occurred
```

```
## Warning: glm.fit: fitted probabilities numerically 0 or 1 occurred
```

```
## Warning: glm.fit: fitted probabilities numerically 0 or 1 occurred
```

```
## Warning: glm.fit: fitted probabilities numerically 0 or 1 occurred
```

```
##
## - 'D-Domer' 1
## - 'Please specify: (choice=Congestive Heart Failure)' 1
## - 'Does the patient have a history of cancer?' 1
## - SIRS_WBC 1
## <none>
## - 'Please specify: (choice=Chronic Renal Insufficiency)' 1
## - 'Please specify: (choice=Hypertension)' 1
## - 'SIRS RR' 1
## - SIRS...110 1
## - 'Insurance Class' 3
## - 'Please specify: (choice=Chronic- Hepatitis C)' 1
## - Ferritin 1
## - 'Was the patient placed in a prone position during their admission?' 1
```



```

## - 'Age at Admission' 1
## - CRP 1
## - 'Was plasma given to the patient during this admission?' 1
## - 'COVID- Was hydroxychloroquine (Plaquenil) given during the patient's admission?' 1
## - 'Did the patient receive hemodialysis during this admission?' 1
## Deviance
## - 'D-Domer' 234.17
## - 'Please specify: (choice=Congestive Heart Failure)' 234.92
## - 'Does the patient have a history of cancer?' 235.13
## - SIRS_WBC 235.45
## <none> 233.50
## - 'Please specify: (choice=Chronic Renal Insufficiency)' 235.51
## - 'Please specify: (choice=Hypertension)' 235.75
## - 'SIRS RR' 236.50
## - SIRS...110 236.72
## - 'Insurance Class' 240.80
## - 'Please specify: (choice=Chronic- Hepatitis C)' 237.97
## - Ferritin 240.69
## - 'Was the patient placed in a prone position during their admission?' 240.81
## - 'Age at Admission' 240.90
## - CRP 241.72
## - 'Was plasma given to the patient during this admission?' 241.82
## - 'COVID- Was hydroxychloroquine (Plaquenil) given during the patient's admission?' 243.93
## - 'Did the patient receive hemodialysis during this admission?' 247.86
## AIC
## - 'D-Domer' 272.17
## - 'Please specify: (choice=Congestive Heart Failure)' 272.92
## - 'Does the patient have a history of cancer?' 273.13
## - SIRS_WBC 273.45
## <none> 273.50
## - 'Please specify: (choice=Chronic Renal Insufficiency)' 273.51
## - 'Please specify: (choice=Hypertension)' 273.75
## - 'SIRS RR' 274.50
## - SIRS...110 274.72
## - 'Insurance Class' 274.80
## - 'Please specify: (choice=Chronic- Hepatitis C)' 275.98
## - Ferritin 278.69
## - 'Was the patient placed in a prone position during their admission?' 278.81
## - 'Age at Admission' 278.90
## - CRP 279.72
## - 'Was plasma given to the patient during this admission?' 279.82
## - 'COVID- Was hydroxychloroquine (Plaquenil) given during the patient's admission?' 281.93
## - 'Did the patient receive hemodialysis during this admission?' 285.86

```

```
## Warning: glm.fit: fitted probabilities numerically 0 or 1 occurred
```

```

##
## Step: AIC=272.17
## death ~ 'Insurance Class' + 'Does the patient have a history of cancer?' +
## 'Please specify: (choice=Hypertension)' + 'Please specify: (choice=Congestive Heart Failure)' +
## 'Please specify: (choice=Chronic Renal Insufficiency)' +
## 'Did the patient receive hemodialysis during this admission?' +
## 'Was plasma given to the patient during this admission?' +
## 'Was the patient placed in a prone position during their admission?' +

```

```

##      'COVID- Was hydroxychloroquine (Plaquenil) given during the patient's admission?' +
##      'Age at Admission' + 'SIRS RR' + SIRS_WBC + SIRS...110 +
##      Ferritin + CRP + 'Please specify: (choice=Chronic- Hepatitis C)'

## Warning: glm.fit: fitted probabilities numerically 0 or 1 occurred
## Warning: glm.fit: fitted probabilities numerically 0 or 1 occurred
## Warning: glm.fit: fitted probabilities numerically 0 or 1 occurred
## Warning: glm.fit: fitted probabilities numerically 0 or 1 occurred
## Warning: glm.fit: fitted probabilities numerically 0 or 1 occurred
## Warning: glm.fit: fitted probabilities numerically 0 or 1 occurred
## Warning: glm.fit: fitted probabilities numerically 0 or 1 occurred
## Warning: glm.fit: fitted probabilities numerically 0 or 1 occurred
## Warning: glm.fit: fitted probabilities numerically 0 or 1 occurred
## Warning: glm.fit: fitted probabilities numerically 0 or 1 occurred
## Warning: glm.fit: fitted probabilities numerically 0 or 1 occurred
## Warning: glm.fit: fitted probabilities numerically 0 or 1 occurred
## Warning: glm.fit: fitted probabilities numerically 0 or 1 occurred
## Warning: glm.fit: fitted probabilities numerically 0 or 1 occurred
## Warning: glm.fit: fitted probabilities numerically 0 or 1 occurred
## Warning: glm.fit: fitted probabilities numerically 0 or 1 occurred
## Warning: glm.fit: fitted probabilities numerically 0 or 1 occurred
## Warning: glm.fit: fitted probabilities numerically 0 or 1 occurred

##                                                                 Df
## - 'Please specify: (choice=Congestive Heart Failure)'           1
## - 'Does the patient have a history of cancer?'                 1
## <none>
## - 'Please specify: (choice=Chronic Renal Insufficiency)'       1
## - SIRS_WBC                                                       1
## - 'Please specify: (choice=Hypertension)'                       1
## - 'Insurance Class'                                             3
## - 'SIRS RR'                                                      1
## - SIRS...110                                                     1
## - 'Please specify: (choice=Chronic- Hepatitis C)'              1
## - 'Age at Admission'                                             1
## - 'Was the patient placed in a prone position during their admission?' 1
## - 'Was plasma given to the patient during this admission?'     1
## - Ferritin                                                       1
## - CRP                                                             1
## - 'COVID- Was hydroxychloroquine (Plaquenil) given during the patient's admission?' 1
## - 'Did the patient receive hemodialysis during this admission?' 1
##                                                                 Deviance
## - 'Please specify: (choice=Congestive Heart Failure)'           235.56

```

```

## - 'Does the patient have a history of cancer?' 235.78
## <none> 234.17
## - 'Please specify: (choice=Chronic Renal Insufficiency)' 236.21
## - SIRS_WBC 236.34
## - 'Please specify: (choice=Hypertension)' 236.95
## - 'Insurance Class' 241.20
## - 'SIRS RR' 237.58
## - SIRS...110 237.65
## - 'Please specify: (choice=Chronic- Hepatitis C)' 240.68
## - 'Age at Admission' 241.64
## - 'Was the patient placed in a prone position during their admission?' 241.78
## - 'Was plasma given to the patient during this admission?' 242.49
## - Ferritin 242.55
## - CRP 243.01
## - 'COVID- Was hydroxychloroquine (Plaquenil) given during the patient's admission?' 244.76
## - 'Did the patient receive hemodialysis during this admission?' 248.60
## AIC
## - 'Please specify: (choice=Congestive Heart Failure)' 271.56
## - 'Does the patient have a history of cancer?' 271.78
## <none> 272.17
## - 'Please specify: (choice=Chronic Renal Insufficiency)' 272.21
## - SIRS_WBC 272.34
## - 'Please specify: (choice=Hypertension)' 272.95
## - 'Insurance Class' 273.20
## - 'SIRS RR' 273.58
## - SIRS...110 273.65
## - 'Please specify: (choice=Chronic- Hepatitis C)' 276.68
## - 'Age at Admission' 277.64
## - 'Was the patient placed in a prone position during their admission?' 277.77
## - 'Was plasma given to the patient during this admission?' 278.49
## - Ferritin 278.55
## - CRP 279.01
## - 'COVID- Was hydroxychloroquine (Plaquenil) given during the patient's admission?' 280.76
## - 'Did the patient receive hemodialysis during this admission?' 284.60

```

```
## Warning: glm.fit: fitted probabilities numerically 0 or 1 occurred
```

```

##
## Step: AIC=271.55
## death ~ 'Insurance Class' + 'Does the patient have a history of cancer?' +
## 'Please specify: (choice=Hypertension)' + 'Please specify: (choice=Chronic Renal Insufficiency)'
## 'Did the patient receive hemodialysis during this admission?' +
## 'Was plasma given to the patient during this admission?' +
## 'Was the patient placed in a prone position during their admission?' +
## 'COVID- Was hydroxychloroquine (Plaquenil) given during the patient's admission?' +
## 'Age at Admission' + 'SIRS RR' + SIRS_WBC + SIRS...110 +
## Ferritin + CRP + 'Please specify: (choice=Chronic- Hepatitis C)'

```

```
## Warning: glm.fit: fitted probabilities numerically 0 or 1 occurred
```

```
## Warning: glm.fit: fitted probabilities numerically 0 or 1 occurred
```

```
## Warning: glm.fit: fitted probabilities numerically 0 or 1 occurred
```

```

## Warning: glm.fit: fitted probabilities numerically 0 or 1 occurred
## Warning: glm.fit: fitted probabilities numerically 0 or 1 occurred
## Warning: glm.fit: fitted probabilities numerically 0 or 1 occurred
## Warning: glm.fit: fitted probabilities numerically 0 or 1 occurred
## Warning: glm.fit: fitted probabilities numerically 0 or 1 occurred
## Warning: glm.fit: fitted probabilities numerically 0 or 1 occurred
## Warning: glm.fit: fitted probabilities numerically 0 or 1 occurred
## Warning: glm.fit: fitted probabilities numerically 0 or 1 occurred
## Warning: glm.fit: fitted probabilities numerically 0 or 1 occurred
## Warning: glm.fit: fitted probabilities numerically 0 or 1 occurred
## Warning: glm.fit: fitted probabilities numerically 0 or 1 occurred

```

|                                                                                        | Df       |
|----------------------------------------------------------------------------------------|----------|
| ## - 'Does the patient have a history of cancer?'                                      | 1        |
| ## <none>                                                                              |          |
| ## - 'Please specify: (choice=Chronic Renal Insufficiency)'                            | 1        |
| ## - SIRS_WBC                                                                          | 1        |
| ## - 'Insurance Class'                                                                 | 3        |
| ## - 'Please specify: (choice=Hypertension)'                                           | 1        |
| ## - SIRS...110                                                                        | 1        |
| ## - 'SIRS RR'                                                                         | 1        |
| ## - 'Please specify: (choice=Chronic- Hepatitis C)'                                   | 1        |
| ## - 'Age at Admission'                                                                | 1        |
| ## - 'Was the patient placed in a prone position during their admission?'              | 1        |
| ## - Ferritin                                                                          | 1        |
| ## - 'Was plasma given to the patient during this admission?'                          | 1        |
| ## - CRP                                                                               | 1        |
| ## - 'COVID- Was hydroxychloroquine (Plaquenil) given during the patient's admission?' | 1        |
| ## - 'Did the patient receive hemodialysis during this admission?'                     | 1        |
| ##                                                                                     | Deviance |
| ## - 'Does the patient have a history of cancer?'                                      | 237.17   |
| ## <none>                                                                              | 235.56   |
| ## - 'Please specify: (choice=Chronic Renal Insufficiency)'                            | 237.69   |
| ## - SIRS_WBC                                                                          | 237.85   |
| ## - 'Insurance Class'                                                                 | 242.34   |
| ## - 'Please specify: (choice=Hypertension)'                                           | 238.50   |
| ## - SIRS...110                                                                        | 239.12   |
| ## - 'SIRS RR'                                                                         | 239.18   |
| ## - 'Please specify: (choice=Chronic- Hepatitis C)'                                   | 241.86   |
| ## - 'Age at Admission'                                                                | 242.67   |
| ## - 'Was the patient placed in a prone position during their admission?'              | 243.16   |
| ## - Ferritin                                                                          | 243.37   |
| ## - 'Was plasma given to the patient during this admission?'                          | 243.63   |

```

## - CRP 244.00
## - 'COVID- Was hydroxychloroquine (Plaquenil) given during the patient's admission?' 246.21
## - 'Did the patient receive hemodialysis during this admission?' 250.45
## AIC
## - 'Does the patient have a history of cancer?' 271.17
## <none> 271.56
## - 'Please specify: (choice=Chronic Renal Insufficiency)' 271.69
## - SIRS_WBC 271.85
## - 'Insurance Class' 272.34
## - 'Please specify: (choice=Hypertension)' 272.50
## - SIRS...110 273.12
## - 'SIRS RR' 273.18
## - 'Please specify: (choice=Chronic- Hepatitis C)' 275.86
## - 'Age at Admission' 276.67
## - 'Was the patient placed in a prone position during their admission?' 277.16
## - Ferritin 277.37
## - 'Was plasma given to the patient during this admission?' 277.63
## - CRP 278.00
## - 'COVID- Was hydroxychloroquine (Plaquenil) given during the patient's admission?' 280.21
## - 'Did the patient receive hemodialysis during this admission?' 284.45

```

```
## Warning: glm.fit: fitted probabilities numerically 0 or 1 occurred
```

```

##
## Step: AIC=271.17
## death ~ 'Insurance Class' + 'Please specify: (choice=Hypertension)' +
## 'Please specify: (choice=Chronic Renal Insufficiency)' +
## 'Did the patient receive hemodialysis during this admission?' +
## 'Was plasma given to the patient during this admission?' +
## 'Was the patient placed in a prone position during their admission?' +
## 'COVID- Was hydroxychloroquine (Plaquenil) given during the patient's admission?' +
## 'Age at Admission' + 'SIRS RR' + SIRS_WBC + SIRS...110 +
## Ferritin + CRP + 'Please specify: (choice=Chronic- Hepatitis C)'

```

```
## Warning: glm.fit: fitted probabilities numerically 0 or 1 occurred
```

```
## Warning: glm.fit: fitted probabilities numerically 0 or 1 occurred
```

```
## Warning: glm.fit: fitted probabilities numerically 0 or 1 occurred
```

```
## Warning: glm.fit: fitted probabilities numerically 0 or 1 occurred
```

```
## Warning: glm.fit: fitted probabilities numerically 0 or 1 occurred
```

```
## Warning: glm.fit: fitted probabilities numerically 0 or 1 occurred
```

```
## Warning: glm.fit: fitted probabilities numerically 0 or 1 occurred
```

```
## Warning: glm.fit: fitted probabilities numerically 0 or 1 occurred
```

```
## Warning: glm.fit: fitted probabilities numerically 0 or 1 occurred
```

```
## Warning: glm.fit: fitted probabilities numerically 0 or 1 occurred
```

## Warning: glm.fit: fitted probabilities numerically 0 or 1 occurred

## Warning: glm.fit: fitted probabilities numerically 0 or 1 occurred

## Warning: glm.fit: fitted probabilities numerically 0 or 1 occurred

| ##                                                                                     | Df       |
|----------------------------------------------------------------------------------------|----------|
| ## <none>                                                                              |          |
| ## - 'Please specify: (choice=Chronic Renal Insufficiency)'                            | 1        |
| ## - 'Insurance Class'                                                                 | 3        |
| ## - SIRS_WBC                                                                          | 1        |
| ## - 'Please specify: (choice=Hypertension)'                                           | 1        |
| ## - 'SIRS RR'                                                                         | 1        |
| ## - SIRS...110                                                                        | 1        |
| ## - 'Please specify: (choice=Chronic- Hepatitis C)'                                   | 1        |
| ## - 'Was the patient placed in a prone position during their admission?'              | 1        |
| ## - 'Was plasma given to the patient during this admission?'                          | 1        |
| ## - Ferritin                                                                          | 1        |
| ## - 'Age at Admission'                                                                | 1        |
| ## - CRP                                                                               | 1        |
| ## - 'COVID- Was hydroxychloroquine (Plaquenil) given during the patient's admission?' | 1        |
| ## - 'Did the patient receive hemodialysis during this admission?'                     | 1        |
| ##                                                                                     | Deviance |
| ## <none>                                                                              | 237.17   |
| ## - 'Please specify: (choice=Chronic Renal Insufficiency)'                            | 239.19   |
| ## - 'Insurance Class'                                                                 | 243.68   |
| ## - SIRS_WBC                                                                          | 239.70   |
| ## - 'Please specify: (choice=Hypertension)'                                           | 239.90   |
| ## - 'SIRS RR'                                                                         | 240.41   |
| ## - SIRS...110                                                                        | 240.48   |
| ## - 'Please specify: (choice=Chronic- Hepatitis C)'                                   | 243.77   |
| ## - 'Was the patient placed in a prone position during their admission?'              | 244.62   |
| ## - 'Was plasma given to the patient during this admission?'                          | 244.79   |
| ## - Ferritin                                                                          | 244.88   |
| ## - 'Age at Admission'                                                                | 245.01   |
| ## - CRP                                                                               | 245.27   |
| ## - 'COVID- Was hydroxychloroquine (Plaquenil) given during the patient's admission?' | 247.55   |
| ## - 'Did the patient receive hemodialysis during this admission?'                     | 251.61   |
| ##                                                                                     | AIC      |
| ## <none>                                                                              | 271.17   |
| ## - 'Please specify: (choice=Chronic Renal Insufficiency)'                            | 271.19   |
| ## - 'Insurance Class'                                                                 | 271.68   |
| ## - SIRS_WBC                                                                          | 271.70   |
| ## - 'Please specify: (choice=Hypertension)'                                           | 271.89   |
| ## - 'SIRS RR'                                                                         | 272.41   |
| ## - SIRS...110                                                                        | 272.48   |
| ## - 'Please specify: (choice=Chronic- Hepatitis C)'                                   | 275.77   |
| ## - 'Was the patient placed in a prone position during their admission?'              | 276.62   |
| ## - 'Was plasma given to the patient during this admission?'                          | 276.79   |
| ## - Ferritin                                                                          | 276.88   |
| ## - 'Age at Admission'                                                                | 277.01   |
| ## - CRP                                                                               | 277.27   |
| ## - 'COVID- Was hydroxychloroquine (Plaquenil) given during the patient's admission?' | 279.55   |

## - 'Did the patient receive hemodialysis during this admission?' 283.61

```
##
## Call: glm(formula = death ~ 'Insurance Class' + 'Please specify: (choice=Hypertension)' +
## 'Please specify: (choice=Chronic Renal Insufficiency)' +
## 'Did the patient receive hemodialysis during this admission?' +
## 'Was plasma given to the patient during this admission?' +
## 'Was the patient placed in a prone position during their admission?' +
## 'COVID- Was hydroxychloroquine (Plaquenil) given during the patient's admission?' +
## 'Age at Admission' + 'SIRS RR' + SIRS_WBC + SIRS...110 +
## Ferritin + CRP + 'Please specify: (choice=Chronic- Hepatitis C)',
## family = binomial, data = under.0.25.variables.no.redcap)
##
```

## Coefficients:

```
## (Intercept)
## -8.037e+00
## 'Insurance Class'MEDICAID
## 1.251e+00
## 'Insurance Class'MEDICARE
## 4.850e-01
## 'Insurance Class'SP
## -1.385e+01
## 'Please specify: (choice=Hypertension)'1
## 6.015e-01
## 'Please specify: (choice=Chronic Renal Insufficiency)'1
## 8.638e-01
## 'Did the patient receive hemodialysis during this admission?'1
## 2.201e+00
## 'Was plasma given to the patient during this admission?'1
## 1.108e+00
## 'Was the patient placed in a prone position during their admission?'1
## 1.066e+00
## 'COVID- Was hydroxychloroquine (Plaquenil) given during the patient's admission?'1
## 1.144e+00
## 'Age at Admission'
## 4.697e-02
## 'SIRS RR'
## 8.447e-01
## SIRS_WBC
## 6.768e-01
## SIRS...110
## -4.391e-01
## Ferritin
## 6.688e-04
## CRP
## 5.499e-03
## 'Please specify: (choice=Chronic- Hepatitis C)'1
## 1.824e+01
##
```

## Degrees of Freedom: 327 Total (i.e. Null); 311 Residual

## Null Deviance: 359.8

## Residual Deviance: 237.2 AIC: 271.2

```
best.step.model = glm(formula = death ~ 'Insurance Class' + 'Please specify: (choice=Hypertension)' +
  'Please specify: (choice=Chronic Renal Insufficiency)' +
  'Did the patient receive hemodialysis during this admission?' +
  'Was plasma given to the patient during this admission?' +
  'Was the patient placed in a prone position during their admission?' +
  'COVID- Was hydroxychloroquine (Plaquenil) given during the patient's admission?' +
  'Age at Admission' + 'SIRS RR' + SIRS_WBC + SIRS...110 +
  Ferritin + CRP + 'Please specify: (choice=Chronic- Hepatitis C)',
  family = binomial, data = under.0.25.variables.no.redcap) # AIC = 271
```

```
## Warning: glm.fit: fitted probabilities numerically 0 or 1 occurred
```

```
best.step.summary = summary(best.step.model)
car::vif(best.step.model)
```

|                                                                                      | GVIF            |
|--------------------------------------------------------------------------------------|-----------------|
| ## 'Insurance Class'                                                                 | 2.259835        |
| ## 'Please specify: (choice=Hypertension)'                                           | 1.142467        |
| ## 'Please specify: (choice=Chronic Renal Insufficiency)'                            | 1.043035        |
| ## 'Did the patient receive hemodialysis during this admission?'                     | 1.112689        |
| ## 'Was plasma given to the patient during this admission?'                          | 1.119553        |
| ## 'Was the patient placed in a prone position during their admission?'              | 1.203011        |
| ## 'COVID- Was hydroxychloroquine (Plaquenil) given during the patient's admission?' | 1.214864        |
| ## 'Age at Admission'                                                                | 2.557943        |
| ## 'SIRS RR'                                                                         | 1.524893        |
| ## SIRS_WBC                                                                          | 1.292729        |
| ## SIRS...110                                                                        | 1.908686        |
| ## Ferritin                                                                          | 1.087930        |
| ## CRP                                                                               | 1.158682        |
| ## 'Please specify: (choice=Chronic- Hepatitis C)'                                   | 1.000000        |
| ##                                                                                   | Df              |
| ## 'Insurance Class'                                                                 | 3               |
| ## 'Please specify: (choice=Hypertension)'                                           | 1               |
| ## 'Please specify: (choice=Chronic Renal Insufficiency)'                            | 1               |
| ## 'Did the patient receive hemodialysis during this admission?'                     | 1               |
| ## 'Was plasma given to the patient during this admission?'                          | 1               |
| ## 'Was the patient placed in a prone position during their admission?'              | 1               |
| ## 'COVID- Was hydroxychloroquine (Plaquenil) given during the patient's admission?' | 1               |
| ## 'Age at Admission'                                                                | 1               |
| ## 'SIRS RR'                                                                         | 1               |
| ## SIRS_WBC                                                                          | 1               |
| ## SIRS...110                                                                        | 1               |
| ## Ferritin                                                                          | 1               |
| ## CRP                                                                               | 1               |
| ## 'Please specify: (choice=Chronic- Hepatitis C)'                                   | 1               |
| ##                                                                                   | GVIF^(1/(2*Df)) |
| ## 'Insurance Class'                                                                 | 1.145547        |
| ## 'Please specify: (choice=Hypertension)'                                           | 1.068863        |
| ## 'Please specify: (choice=Chronic Renal Insufficiency)'                            | 1.021291        |
| ## 'Did the patient receive hemodialysis during this admission?'                     | 1.054841        |
| ## 'Was plasma given to the patient during this admission?'                          | 1.058090        |
| ## 'Was the patient placed in a prone position during their admission?'              | 1.096818        |



```

## 'COVID- Was hydroxychloroquine (Plaquenil) given during the patient's admission?' 1.102209
## 'Age at Admission' 1.599357
## 'SIRS RR' 1.234866
## SIRS_WBC 1.136983
## SIRS...110 1.381552
## Ferritin 1.043039
## CRP 1.076421
## 'Please specify: (choice=Chronic- Hepatitis C)' 1.000000

```

```

best.step.summary.p.values = best.step.summary$coefficients[,4]
best.step.conf.intervals = exp(cbind(coef(best.step.model), confint(best.step.model)))

```

```
## Waiting for profiling to be done...
```

```

## Warning: glm.fit: fitted probabilities numerically 0 or 1 occurred
## Warning: glm.fit: fitted probabilities numerically 0 or 1 occurred
## Warning: glm.fit: fitted probabilities numerically 0 or 1 occurred
## Warning: glm.fit: fitted probabilities numerically 0 or 1 occurred
## Warning: glm.fit: fitted probabilities numerically 0 or 1 occurred
## Warning: glm.fit: fitted probabilities numerically 0 or 1 occurred
## Warning: glm.fit: fitted probabilities numerically 0 or 1 occurred
## Warning: glm.fit: fitted probabilities numerically 0 or 1 occurred
## Warning: glm.fit: fitted probabilities numerically 0 or 1 occurred
## Warning: glm.fit: fitted probabilities numerically 0 or 1 occurred
## Warning: glm.fit: fitted probabilities numerically 0 or 1 occurred
## Warning: glm.fit: fitted probabilities numerically 0 or 1 occurred
## Warning: glm.fit: fitted probabilities numerically 0 or 1 occurred
## Warning: glm.fit: fitted probabilities numerically 0 or 1 occurred
## Warning: glm.fit: fitted probabilities numerically 0 or 1 occurred
## Warning: glm.fit: fitted probabilities numerically 0 or 1 occurred
## Warning: glm.fit: fitted probabilities numerically 0 or 1 occurred
## Warning: glm.fit: fitted probabilities numerically 0 or 1 occurred
## Warning: glm.fit: fitted probabilities numerically 0 or 1 occurred
## Warning: glm.fit: fitted probabilities numerically 0 or 1 occurred
## Warning: glm.fit: fitted probabilities numerically 0 or 1 occurred

```













```
## Warning: glm.fit: fitted probabilities numerically 0 or 1 occurred
```

```
best.step.conf.intervals.df = data.frame(best.step.conf.intervals)
```

```
best.step.conf.intervals.df$p.values = best.step.summary.p.values
```

```
logitgof(under.0.25.variables.no.redcap.death, fitted(best.step.model), g = 10) # hosmer and lemeshow p
```

```
## Warning in logitgof(under.0.25.variables.no.redcap.death,
```

```
## fitted(best.step.model), : At least one cell in the expected frequencies table
```

```
## is < 1. Chi-square approximation may be incorrect.
```

```
##
```

```
## Hosmer and Lemeshow test (binary model)
```

```
##
```

```
## data: under.0.25.variables.no.redcap.death, fitted(best.step.model)
```

```
## X-squared = 7.6233, df = 8, p-value = 0.4711
```

```
# what is in [under.0.25.variables] that has a ton of NAs to potentially increase sample size
```

```
nas.in.complete.set = colSums(is.na(under.0.25.variables)) # Ferritin: 565, CRP: 451, D-Dimer: 479
```

```
# While Ferritin, CRP, and D-Dimer may have been predictive (p = 0.04, 0.007, 0.363), they severely limit
```

```
# Could other variables be predictive of mortality with an increase in power?
```

```
under.0.25.remove.low.yield.labs = subset(under.0.25.variables, select = -c('REDCap Record ID', Ferritin))
```

```
# make dataframe to get demographics
```

```
no.labs.dems = subset(under.0.25.variables, select = -c(Ferritin, CRP, 'D-Dimer', 'Was the patient intubated'))
```

```
no.labs.dems.na = na.omit(no.labs.dems)
```

```
complete.df.minus.labs = na.omit(under.0.25.remove.low.yield.labs) # now up to 992 pts
```

```
# MODEL 1B
```

```
saturated.log.reg.no.labs = glm(death ~ ., family = binomial, data = complete.df.minus.labs) # AIC is 8.0
```

```
car::vif(saturated.log.reg.no.labs)
```

```
##                                                                 GVIF
## 'Insurance Class'                                                                 2.279801
## 'Race:'                                                                 1.714471
## 'Does the patient have a history of cancer?'                                                                 1.093149
## 'Please specify: (choice=Hypertension)'                                                                 1.205547
## 'Please specify: (choice=Coronary Artery Disease)'                                                                 1.238042
## 'Please specify: (choice=Congestive Heart Failure)'                                                                 1.238159
## 'Please specify: (choice=Asthma)'                                                                 1.040367
## 'Please specify: (choice=Chronic Obstructive Pulmonary Disease)'                                                                 1.107184
## 'Please specify: (choice=Chronic Renal Insufficiency)'                                                                 1.138820
## 'Please specify: (choice=Cirrhosis)'                                                                 1.223888
## 'Did the patient receive hemodialysis during this admission?'                                                                 1.363067
## 'Was plasma given to the patient during this admission?'                                                                 1.233912
## 'Was the patient placed in a prone position during their admission?'                                                                 1.253563
## 'COVID- Was hydroxychloroquine (Plaquenil) given during the patient's admission?'                                                                 1.362509
## 'Age at Admission'                                                                 2.382702
## Per_Capita                                                                 1.171861
## 'SIRS RR'                                                                 1.766470
```



|                                                                                      |                 |
|--------------------------------------------------------------------------------------|-----------------|
| ## SIRS_WBC                                                                          | 1.315242        |
| ## SIRS...110                                                                        | 2.814315        |
| ## 'Creatinine (if 0 = N/A)'                                                         | 1.382943        |
| ## 'Admission Date:'                                                                 | 1.352925        |
| ## 'Please specify: (choice=Diabetes)'                                               | 1.208306        |
| ## 'SIRS TEMP'                                                                       | 1.886204        |
| ## 'Please specify: (choice=Chronic- Hepatitis C)'                                   | 1.270471        |
| ##                                                                                   | Df              |
| ## 'Insurance Class'                                                                 | 4               |
| ## 'Race:'                                                                           | 6               |
| ## 'Does the patient have a history of cancer?'                                      | 1               |
| ## 'Please specify: (choice=Hypertension)'                                           | 1               |
| ## 'Please specify: (choice=Coronary Artery Disease)'                                | 1               |
| ## 'Please specify: (choice=Congestive Heart Failure)'                               | 1               |
| ## 'Please specify: (choice=Asthma)'                                                 | 1               |
| ## 'Please specify: (choice=Chronic Obstructive Pulmonary Disease)'                  | 1               |
| ## 'Please specify: (choice=Chronic Renal Insufficiency)'                            | 1               |
| ## 'Please specify: (choice=Cirrhosis)'                                              | 1               |
| ## 'Did the patient receive hemodialysis during this admission?'                     | 1               |
| ## 'Was plasma given to the patient during this admission?'                          | 1               |
| ## 'Was the patient placed in a prone position during their admission?'              | 1               |
| ## 'COVID- Was hydroxychloroquine (Plaquenil) given during the patient's admission?' | 1               |
| ## 'Age at Admission'                                                                | 1               |
| ## Per_Capita                                                                        | 1               |
| ## 'SIRS RR'                                                                         | 1               |
| ## SIRS_WBC                                                                          | 1               |
| ## SIRS...110                                                                        | 1               |
| ## 'Creatinine (if 0 = N/A)'                                                         | 1               |
| ## 'Admission Date:'                                                                 | 1               |
| ## 'Please specify: (choice=Diabetes)'                                               | 1               |
| ## 'SIRS TEMP'                                                                       | 1               |
| ## 'Please specify: (choice=Chronic- Hepatitis C)'                                   | 1               |
| ##                                                                                   | GVIF^(1/(2*Df)) |
| ## 'Insurance Class'                                                                 | 1.108504        |
| ## 'Race:'                                                                           | 1.045950        |
| ## 'Does the patient have a history of cancer?'                                      | 1.045538        |
| ## 'Please specify: (choice=Hypertension)'                                           | 1.097974        |
| ## 'Please specify: (choice=Coronary Artery Disease)'                                | 1.112673        |
| ## 'Please specify: (choice=Congestive Heart Failure)'                               | 1.112726        |
| ## 'Please specify: (choice=Asthma)'                                                 | 1.019984        |
| ## 'Please specify: (choice=Chronic Obstructive Pulmonary Disease)'                  | 1.052228        |
| ## 'Please specify: (choice=Chronic Renal Insufficiency)'                            | 1.067155        |
| ## 'Please specify: (choice=Cirrhosis)'                                              | 1.106295        |
| ## 'Did the patient receive hemodialysis during this admission?'                     | 1.167505        |
| ## 'Was plasma given to the patient during this admission?'                          | 1.110816        |
| ## 'Was the patient placed in a prone position during their admission?'              | 1.119626        |
| ## 'COVID- Was hydroxychloroquine (Plaquenil) given during the patient's admission?' | 1.167266        |
| ## 'Age at Admission'                                                                | 1.543600        |
| ## Per_Capita                                                                        | 1.082525        |
| ## 'SIRS RR'                                                                         | 1.329086        |
| ## SIRS_WBC                                                                          | 1.146840        |
| ## SIRS...110                                                                        | 1.677592        |
| ## 'Creatinine (if 0 = N/A)'                                                         | 1.175986        |
| ## 'Admission Date:'                                                                 | 1.163153        |

```
## 'Please specify: (choice=Diabetes)'1.099230  
## 'SIRS TEMP'1.373391  
## 'Please specify: (choice=Chronic- Hepatitis C)'1.127152
```

```
saturated.log.reg.no.labs.summary = summary(saturated.log.reg.no.labs)
```

```
saturated.log.reg.no.labs.summary.p.values = saturated.log.reg.no.labs.summary$coefficients[,4]
```

```
saturated.log.reg.no.labs.conf.intervals = exp(cbind(coef(saturated.log.reg.no.labs), confint(saturated
```

```
## Waiting for profiling to be done...
```

```
## Warning: glm.fit: fitted probabilities numerically 0 or 1 occurred
```

```
## Warning: glm.fit: fitted probabilities numerically 0 or 1 occurred
```

```
## Warning: glm.fit: fitted probabilities numerically 0 or 1 occurred
```

```
## Warning: glm.fit: fitted probabilities numerically 0 or 1 occurred
```

```
## Warning: glm.fit: fitted probabilities numerically 0 or 1 occurred
```

```
## Warning: glm.fit: fitted probabilities numerically 0 or 1 occurred
```

```
## Warning: glm.fit: fitted probabilities numerically 0 or 1 occurred
```

```
## Warning: glm.fit: fitted probabilities numerically 0 or 1 occurred
```

```
## Warning: glm.fit: fitted probabilities numerically 0 or 1 occurred
```

```
## Warning: glm.fit: fitted probabilities numerically 0 or 1 occurred
```

```
## Warning: glm.fit: fitted probabilities numerically 0 or 1 occurred
```

```
## Warning: glm.fit: fitted probabilities numerically 0 or 1 occurred
```

```
## Warning: glm.fit: fitted probabilities numerically 0 or 1 occurred
```

```
## Warning: glm.fit: fitted probabilities numerically 0 or 1 occurred
```

```
## Warning: glm.fit: fitted probabilities numerically 0 or 1 occurred
```

```
## Warning: glm.fit: fitted probabilities numerically 0 or 1 occurred
```

```
## Warning: glm.fit: fitted probabilities numerically 0 or 1 occurred
```

```
## Warning: glm.fit: fitted probabilities numerically 0 or 1 occurred
```

```
## Warning: glm.fit: fitted probabilities numerically 0 or 1 occurred
```

```
## Warning: glm.fit: fitted probabilities numerically 0 or 1 occurred
```

```
## Warning: glm.fit: fitted probabilities numerically 0 or 1 occurred
```



```

## Warning: glm.fit: fitted probabilities numerically 0 or 1 occurred
## Warning: glm.fit: fitted probabilities numerically 0 or 1 occurred
## Warning: glm.fit: fitted probabilities numerically 0 or 1 occurred
## Warning: glm.fit: fitted probabilities numerically 0 or 1 occurred
## Warning: glm.fit: fitted probabilities numerically 0 or 1 occurred
## Warning: glm.fit: fitted probabilities numerically 0 or 1 occurred
## Warning: glm.fit: fitted probabilities numerically 0 or 1 occurred
## Warning: glm.fit: fitted probabilities numerically 0 or 1 occurred
## Warning: glm.fit: fitted probabilities numerically 0 or 1 occurred
## Warning: glm.fit: fitted probabilities numerically 0 or 1 occurred
## Warning: glm.fit: fitted probabilities numerically 0 or 1 occurred

saturated.log.reg.no.labs.conf.intervals.df = data.frame(saturated.log.reg.no.labs.conf.intervals)
saturated.log.reg.no.labs.conf.intervals.df$p.values = saturated.log.reg.no.labs.summary.p.values

under.0.25.variables.no.redcap.no.labs.death = complete.df.minus.labs$death
logitgof(under.0.25.variables.no.redcap.no.labs.death, fitted(saturated.log.reg.no.labs), g = 10) # Hosmer and Lemeshow test

## Warning in logitgof(under.0.25.variables.no.redcap.no.labs.death,
## fitted(saturated.log.reg.no.labs), : At least one cell in the expected
## frequencies table is < 1. Chi-square approximation may be incorrect.

##
## Hosmer and Lemeshow test (binary model)
##
## data: under.0.25.variables.no.redcap.no.labs.death, fitted(saturated.log.reg.no.labs)
## X-squared = 13.824, df = 8, p-value = 0.08648

## can we improve the model with larger sample size through backwards selection?
step(saturated.log.reg.no.labs) # function actually run just slows down computer

## Start: AIC=832.89
## death ~ 'Insurance Class' + 'Race:' + 'Does the patient have a history of cancer?' +
## 'Please specify: (choice=Hypertension)' + 'Please specify: (choice=Coronary Artery Disease)' +
## 'Please specify: (choice=Congestive Heart Failure)' + 'Please specify: (choice=Asthma)' +
## 'Please specify: (choice=Chronic Obstructive Pulmonary Disease)' +
## 'Please specify: (choice=Chronic Renal Insufficiency)' +
## 'Please specify: (choice=Cirrhosis)' + 'Did the patient receive hemodialysis during this admission?' +
## 'Was plasma given to the patient during this admission?' +
## 'Was the patient placed in a prone position during their admission?' +
## 'COVID- Was hydroxychloroquine (Plaquenil) given during the patient's admission?' +
## 'Age at Admission' + Per_Capita + 'SIRS RR' + SIRS_WBC +
## SIRS...110 + 'Creatinine (if 0 = N/A)' + 'Admission Date:' +
## 'Please specify: (choice=Diabetes)' + 'SIRS TEMP' + 'Please specify: (choice=Chronic- Hepatitis'

```

```

##
##
## - 'Race:' 6
## - 'Insurance Class' 4
## - SIRS...110 1
## - 'Please specify: (choice=Asthma)' 1
## - 'SIRS TEMP' 1
## - Per_Capita 1
## - 'Please specify: (choice=Chronic Obstructive Pulmonary Disease)' 1
## - 'Please specify: (choice=Chronic- Hepatitis C)' 1
## - 'Please specify: (choice=Diabetes)' 1
## - 'Please specify: (choice=Hypertension)' 1
## - 'Creatinine (if 0 = N/A)' 1
## - 'Please specify: (choice=Coronary Artery Disease)' 1
## - 'Please specify: (choice=Chronic Renal Insufficiency)' 1
## - 'Does the patient have a history of cancer?' 1
## <none>
## - 'Please specify: (choice=Cirrhosis)' 1
## - 'Please specify: (choice=Congestive Heart Failure)' 1
## - 'SIRS RR' 1
## - SIRS_WBC 1
## - 'Was plasma given to the patient during this admission?' 1
## - 'Admission Date:' 1
## - 'Did the patient receive hemodialysis during this admission?' 1
## - 'COVID- Was hydroxychloroquine (Plaquenil) given during the patient's admission?' 1
## - 'Was the patient placed in a prone position during their admission?' 1
## - 'Age at Admission' 1
##
## Deviance
## - 'Race:' 768.75
## - 'Insurance Class' 770.20
## - SIRS...110 766.94
## - 'Please specify: (choice=Asthma)' 767.22
## - 'SIRS TEMP' 767.28
## - Per_Capita 767.37
## - 'Please specify: (choice=Chronic Obstructive Pulmonary Disease)' 767.55
## - 'Please specify: (choice=Chronic- Hepatitis C)' 767.71
## - 'Please specify: (choice=Diabetes)' 767.73
## - 'Please specify: (choice=Hypertension)' 767.91
## - 'Creatinine (if 0 = N/A)' 768.06
## - 'Please specify: (choice=Coronary Artery Disease)' 768.38
## - 'Please specify: (choice=Chronic Renal Insufficiency)' 768.58
## - 'Does the patient have a history of cancer?' 768.59
## <none> 766.89
## - 'Please specify: (choice=Cirrhosis)' 771.44
## - 'Please specify: (choice=Congestive Heart Failure)' 773.25
## - 'SIRS RR' 775.91
## - SIRS_WBC 780.41
## - 'Was plasma given to the patient during this admission?' 781.13
## - 'Admission Date:' 781.37
## - 'Did the patient receive hemodialysis during this admission?' 786.21
## - 'COVID- Was hydroxychloroquine (Plaquenil) given during the patient's admission?' 790.15
## - 'Was the patient placed in a prone position during their admission?' 796.66
## - 'Age at Admission' 823.07
##
## AIC

```

```

## - 'Race:' 822.75
## - 'Insurance Class' 828.20
## - SIRS...110 830.94
## - 'Please specify: (choice=Asthma)' 831.22
## - 'SIRS TEMP' 831.28
## - Per_Capita 831.37
## - 'Please specify: (choice=Chronic Obstructive Pulmonary Disease)' 831.55
## - 'Please specify: (choice=Chronic- Hepatitis C)' 831.71
## - 'Please specify: (choice=Diabetes)' 831.73
## - 'Please specify: (choice=Hypertension)' 831.91
## - 'Creatinine (if 0 = N/A)' 832.06
## - 'Please specify: (choice=Coronary Artery Disease)' 832.38
## - 'Please specify: (choice=Chronic Renal Insufficiency)' 832.58
## - 'Does the patient have a history of cancer?' 832.59
## <none> 832.89
## - 'Please specify: (choice=Cirrhosis)' 835.44
## - 'Please specify: (choice=Congestive Heart Failure)' 837.25
## - 'SIRS RR' 839.91
## - SIRS_WBC 844.41
## - 'Was plasma given to the patient during this admission?' 845.13
## - 'Admission Date:' 845.37
## - 'Did the patient receive hemodialysis during this admission?' 850.21
## - 'COVID- Was hydroxychloroquine (Plaquenil) given during the patient's admission?' 854.15
## - 'Was the patient placed in a prone position during their admission?' 860.66
## - 'Age at Admission' 887.07
##
## Step: AIC=822.75
## death ~ 'Insurance Class' + 'Does the patient have a history of cancer?' +
## 'Please specify: (choice=Hypertension)' + 'Please specify: (choice=Coronary Artery Disease)' +
## 'Please specify: (choice=Congestive Heart Failure)' + 'Please specify: (choice=Asthma)' +
## 'Please specify: (choice=Chronic Obstructive Pulmonary Disease)' +
## 'Please specify: (choice=Chronic Renal Insufficiency)' +
## 'Please specify: (choice=Cirrhosis)' + 'Did the patient receive hemodialysis during this admission?' +
## 'Was plasma given to the patient during this admission?' +
## 'Was the patient placed in a prone position during their admission?' +
## 'COVID- Was hydroxychloroquine (Plaquenil) given during the patient's admission?' +
## 'Age at Admission' + Per_Capita + 'SIRS RR' + SIRS_WBC +
## SIRS...110 + 'Creatinine (if 0 = N/A)' + 'Admission Date:' +
## 'Please specify: (choice=Diabetes)' + 'SIRS TEMP' + 'Please specify: (choice=Chronic- Hepatitis C)'
##
##
## - 'Insurance Class' Df
## - SIRS...110 4
## - 'Please specify: (choice=Asthma)' 1
## - 'SIRS TEMP' 1
## - 'Please specify: (choice=Chronic Obstructive Pulmonary Disease)' 1
## - Per_Capita 1
## - 'Please specify: (choice=Chronic- Hepatitis C)' 1
## - 'Please specify: (choice=Diabetes)' 1
## - 'Creatinine (if 0 = N/A)' 1
## - 'Please specify: (choice=Hypertension)' 1
## - 'Does the patient have a history of cancer?' 1
## - 'Please specify: (choice=Chronic Renal Insufficiency)' 1
## - 'Please specify: (choice=Coronary Artery Disease)' 1

```

|                                                                                        |          |
|----------------------------------------------------------------------------------------|----------|
| ## <none>                                                                              |          |
| ## - 'Please specify: (choice=Cirrhosis)'                                              | 1        |
| ## - 'Please specify: (choice=Congestive Heart Failure)'                               | 1        |
| ## - 'SIRS RR'                                                                         | 1        |
| ## - SIRS_WBC                                                                          | 1        |
| ## - 'Admission Date:'                                                                 | 1        |
| ## - 'Was plasma given to the patient during this admission?'                          | 1        |
| ## - 'Did the patient receive hemodialysis during this admission?'                     | 1        |
| ## - 'COVID- Was hydroxychloroquine (Plaquenil) given during the patient's admission?' | 1        |
| ## - 'Was the patient placed in a prone position during their admission?'              | 1        |
| ## - 'Age at Admission'                                                                | 1        |
| ##                                                                                     | Deviance |
| ## - 'Insurance Class'                                                                 | 772.54   |
| ## - SIRS...110                                                                        | 768.79   |
| ## - 'Please specify: (choice=Asthma)'                                                 | 769.11   |
| ## - 'SIRS TEMP'                                                                       | 769.12   |
| ## - 'Please specify: (choice=Chronic Obstructive Pulmonary Disease)'                  | 769.27   |
| ## - Per_Capita                                                                        | 769.32   |
| ## - 'Please specify: (choice=Chronic- Hepatitis C)'                                   | 769.53   |
| ## - 'Please specify: (choice=Diabetes)'                                               | 769.66   |
| ## - 'Creatinine (if 0 = N/A)'                                                         | 769.69   |
| ## - 'Please specify: (choice=Hypertension)'                                           | 769.80   |
| ## - 'Does the patient have a history of cancer?'                                      | 770.26   |
| ## - 'Please specify: (choice=Chronic Renal Insufficiency)'                            | 770.30   |
| ## - 'Please specify: (choice=Coronary Artery Disease)'                                | 770.42   |
| ## <none>                                                                              | 768.75   |
| ## - 'Please specify: (choice=Cirrhosis)'                                              | 773.34   |
| ## - 'Please specify: (choice=Congestive Heart Failure)'                               | 775.04   |
| ## - 'SIRS RR'                                                                         | 778.12   |
| ## - SIRS_WBC                                                                          | 782.33   |
| ## - 'Admission Date:'                                                                 | 783.04   |
| ## - 'Was plasma given to the patient during this admission?'                          | 783.33   |
| ## - 'Did the patient receive hemodialysis during this admission?'                     | 789.38   |
| ## - 'COVID- Was hydroxychloroquine (Plaquenil) given during the patient's admission?' | 791.80   |
| ## - 'Was the patient placed in a prone position during their admission?'              | 799.11   |
| ## - 'Age at Admission'                                                                | 825.47   |
| ##                                                                                     | AIC      |
| ## - 'Insurance Class'                                                                 | 818.54   |
| ## - SIRS...110                                                                        | 820.79   |
| ## - 'Please specify: (choice=Asthma)'                                                 | 821.11   |
| ## - 'SIRS TEMP'                                                                       | 821.12   |
| ## - 'Please specify: (choice=Chronic Obstructive Pulmonary Disease)'                  | 821.27   |
| ## - Per_Capita                                                                        | 821.32   |
| ## - 'Please specify: (choice=Chronic- Hepatitis C)'                                   | 821.53   |
| ## - 'Please specify: (choice=Diabetes)'                                               | 821.66   |
| ## - 'Creatinine (if 0 = N/A)'                                                         | 821.69   |
| ## - 'Please specify: (choice=Hypertension)'                                           | 821.80   |
| ## - 'Does the patient have a history of cancer?'                                      | 822.26   |
| ## - 'Please specify: (choice=Chronic Renal Insufficiency)'                            | 822.30   |
| ## - 'Please specify: (choice=Coronary Artery Disease)'                                | 822.42   |
| ## <none>                                                                              | 822.75   |
| ## - 'Please specify: (choice=Cirrhosis)'                                              | 825.34   |
| ## - 'Please specify: (choice=Congestive Heart Failure)'                               | 827.04   |
| ## - 'SIRS RR'                                                                         | 830.12   |

```

## - SIRS_WBC 834.33
## - 'Admission Date:' 835.04
## - 'Was plasma given to the patient during this admission?' 835.33
## - 'Did the patient receive hemodialysis during this admission?' 841.38
## - 'COVID- Was hydroxychloroquine (Plaquenil) given during the patient's admission?' 843.80
## - 'Was the patient placed in a prone position during their admission?' 851.11
## - 'Age at Admission' 877.47
##
## Step: AIC=818.54
## death ~ 'Does the patient have a history of cancer?' + 'Please specify: (choice=Hypertension)' +
## 'Please specify: (choice=Coronary Artery Disease)' + 'Please specify: (choice=Congestive Heart Failure)' +
## 'Please specify: (choice=Asthma)' + 'Please specify: (choice=Chronic Obstructive Pulmonary Disease)' +
## 'Please specify: (choice=Chronic Renal Insufficiency)' +
## 'Please specify: (choice=Cirrhosis)' + 'Did the patient receive hemodialysis during this admission?' +
## 'Was plasma given to the patient during this admission?' +
## 'Was the patient placed in a prone position during their admission?' +
## 'COVID- Was hydroxychloroquine (Plaquenil) given during the patient's admission?' +
## 'Age at Admission' + Per_Capita + 'SIRS RR' + SIRS_WBC +
## SIRS...110 + 'Creatinine (if 0 = N/A)' + 'Admission Date:' +
## 'Please specify: (choice=Diabetes)' + 'SIRS TEMP' + 'Please specify: (choice=Chronic- Hepatitis C)'
##
##
## Df
## - SIRS...110 1
## - 'SIRS TEMP' 1
## - 'Please specify: (choice=Asthma)' 1
## - Per_Capita 1
## - 'Please specify: (choice=Chronic Obstructive Pulmonary Disease)' 1
## - 'Please specify: (choice=Chronic- Hepatitis C)' 1
## - 'Creatinine (if 0 = N/A)' 1
## - 'Please specify: (choice=Hypertension)' 1
## - 'Please specify: (choice=Diabetes)' 1
## - 'Does the patient have a history of cancer?' 1
## - 'Please specify: (choice=Chronic Renal Insufficiency)' 1
## - 'Please specify: (choice=Coronary Artery Disease)' 1
## <none>
## - 'Please specify: (choice=Cirrhosis)' 1
## - 'Please specify: (choice=Congestive Heart Failure)' 1
## - 'SIRS RR' 1
## - 'Admission Date:' 1
## - SIRS_WBC 1
## - 'Was plasma given to the patient during this admission?' 1
## - 'Did the patient receive hemodialysis during this admission?' 1
## - 'COVID- Was hydroxychloroquine (Plaquenil) given during the patient's admission?' 1
## - 'Was the patient placed in a prone position during their admission?' 1
## - 'Age at Admission' 1
##
## Deviance
## - SIRS...110 772.61
## - 'SIRS TEMP' 772.79
## - 'Please specify: (choice=Asthma)' 772.95
## - Per_Capita 772.96
## - 'Please specify: (choice=Chronic Obstructive Pulmonary Disease)' 773.01
## - 'Please specify: (choice=Chronic- Hepatitis C)' 773.37
## - 'Creatinine (if 0 = N/A)' 773.38
## - 'Please specify: (choice=Hypertension)' 773.54

```



```

## - 'Please specify: (choice=Diabetes)' 773.72
## - 'Does the patient have a history of cancer?' 773.80
## - 'Please specify: (choice=Chronic Renal Insufficiency)' 773.94
## - 'Please specify: (choice=Coronary Artery Disease)' 774.03
## <none> 772.54
## - 'Please specify: (choice=Cirrhosis)' 777.29
## - 'Please specify: (choice=Congestive Heart Failure)' 778.71
## - 'SIRS RR' 781.61
## - 'Admission Date:' 786.26
## - SIRS_WBC 786.49
## - 'Was plasma given to the patient during this admission?' 787.60
## - 'Did the patient receive hemodialysis during this admission?' 792.91
## - 'COVID- Was hydroxychloroquine (Plaquenil) given during the patient's admission?' 796.15
## - 'Was the patient placed in a prone position during their admission?' 802.84
## - 'Age at Admission' 846.15
## AIC
## - SIRS...110 816.61
## - 'SIRS TEMP' 816.79
## - 'Please specify: (choice=Asthma)' 816.95
## - Per_Capita 816.96
## - 'Please specify: (choice=Chronic Obstructive Pulmonary Disease)' 817.01
## - 'Please specify: (choice=Chronic- Hepatitis C)' 817.37
## - 'Creatinine (if 0 = N/A)' 817.38
## - 'Please specify: (choice=Hypertension)' 817.54
## - 'Please specify: (choice=Diabetes)' 817.72
## - 'Does the patient have a history of cancer?' 817.80
## - 'Please specify: (choice=Chronic Renal Insufficiency)' 817.94
## - 'Please specify: (choice=Coronary Artery Disease)' 818.03
## <none> 818.54
## - 'Please specify: (choice=Cirrhosis)' 821.29
## - 'Please specify: (choice=Congestive Heart Failure)' 822.71
## - 'SIRS RR' 825.61
## - 'Admission Date:' 830.26
## - SIRS_WBC 830.49
## - 'Was plasma given to the patient during this admission?' 831.60
## - 'Did the patient receive hemodialysis during this admission?' 836.91
## - 'COVID- Was hydroxychloroquine (Plaquenil) given during the patient's admission?' 840.15
## - 'Was the patient placed in a prone position during their admission?' 846.84
## - 'Age at Admission' 890.15
##
## Step: AIC=816.61
## death ~ 'Does the patient have a history of cancer?' + 'Please specify: (choice=Hypertension)' +
## 'Please specify: (choice=Coronary Artery Disease)' + 'Please specify: (choice=Congestive Heart Failure)'
## 'Please specify: (choice=Asthma)' + 'Please specify: (choice=Chronic Obstructive Pulmonary Disease)'
## 'Please specify: (choice=Chronic Renal Insufficiency)' +
## 'Please specify: (choice=Cirrhosis)' + 'Did the patient receive hemodialysis during this admission?'
## 'Was plasma given to the patient during this admission?' +
## 'Was the patient placed in a prone position during their admission?' +
## 'COVID- Was hydroxychloroquine (Plaquenil) given during the patient's admission?' +
## 'Age at Admission' + Per_Capita + 'SIRS RR' + SIRS_WBC +
## 'Creatinine (if 0 = N/A)' + 'Admission Date:' + 'Please specify: (choice=Diabetes)' +
## 'SIRS TEMP' + 'Please specify: (choice=Chronic- Hepatitis C)'
##
## Df

```

|                                                                                        |          |
|----------------------------------------------------------------------------------------|----------|
| ## - 'Please specify: (choice=Asthma)'                                                 | 1        |
| ## - Per_Capita                                                                        | 1        |
| ## - 'Please specify: (choice=Chronic Obstructive Pulmonary Disease)'                  | 1        |
| ## - 'Creatinine (if 0 = N/A)'                                                         | 1        |
| ## - 'SIRS TEMP'                                                                       | 1        |
| ## - 'Please specify: (choice=Chronic- Hepatitis C)'                                   | 1        |
| ## - 'Please specify: (choice=Hypertension)'                                           | 1        |
| ## - 'Please specify: (choice=Diabetes)'                                               | 1        |
| ## - 'Does the patient have a history of cancer?'                                      | 1        |
| ## - 'Please specify: (choice=Chronic Renal Insufficiency)'                            | 1        |
| ## - 'Please specify: (choice=Coronary Artery Disease)'                                | 1        |
| ## <none>                                                                              |          |
| ## - 'Please specify: (choice=Cirrhosis)'                                              | 1        |
| ## - 'Please specify: (choice=Congestive Heart Failure)'                               | 1        |
| ## - 'Admission Date:'                                                                 | 1        |
| ## - 'Was plasma given to the patient during this admission?'                          | 1        |
| ## - 'SIRS RR'                                                                         | 1        |
| ## - SIRS_WBC                                                                          | 1        |
| ## - 'Did the patient receive hemodialysis during this admission?'                     | 1        |
| ## - 'COVID- Was hydroxychloroquine (Plaquenil) given during the patient's admission?' | 1        |
| ## - 'Was the patient placed in a prone position during their admission?'              | 1        |
| ## - 'Age at Admission'                                                                | 1        |
| ##                                                                                     | Deviance |
| ## - 'Please specify: (choice=Asthma)'                                                 | 773.02   |
| ## - Per_Capita                                                                        | 773.05   |
| ## - 'Please specify: (choice=Chronic Obstructive Pulmonary Disease)'                  | 773.08   |
| ## - 'Creatinine (if 0 = N/A)'                                                         | 773.44   |
| ## - 'SIRS TEMP'                                                                       | 773.44   |
| ## - 'Please specify: (choice=Chronic- Hepatitis C)'                                   | 773.47   |
| ## - 'Please specify: (choice=Hypertension)'                                           | 773.61   |
| ## - 'Please specify: (choice=Diabetes)'                                               | 773.76   |
| ## - 'Does the patient have a history of cancer?'                                      | 773.88   |
| ## - 'Please specify: (choice=Chronic Renal Insufficiency)'                            | 773.98   |
| ## - 'Please specify: (choice=Coronary Artery Disease)'                                | 774.06   |
| ## <none>                                                                              | 772.61   |
| ## - 'Please specify: (choice=Cirrhosis)'                                              | 777.31   |
| ## - 'Please specify: (choice=Congestive Heart Failure)'                               | 778.86   |
| ## - 'Admission Date:'                                                                 | 786.27   |
| ## - 'Was plasma given to the patient during this admission?'                          | 787.88   |
| ## - 'SIRS RR'                                                                         | 789.76   |
| ## - SIRS_WBC                                                                          | 790.37   |
| ## - 'Did the patient receive hemodialysis during this admission?'                     | 792.96   |
| ## - 'COVID- Was hydroxychloroquine (Plaquenil) given during the patient's admission?' | 796.18   |
| ## - 'Was the patient placed in a prone position during their admission?'              | 803.87   |
| ## - 'Age at Admission'                                                                | 847.90   |
| ##                                                                                     | AIC      |
| ## - 'Please specify: (choice=Asthma)'                                                 | 815.02   |
| ## - Per_Capita                                                                        | 815.05   |
| ## - 'Please specify: (choice=Chronic Obstructive Pulmonary Disease)'                  | 815.08   |
| ## - 'Creatinine (if 0 = N/A)'                                                         | 815.44   |
| ## - 'SIRS TEMP'                                                                       | 815.44   |
| ## - 'Please specify: (choice=Chronic- Hepatitis C)'                                   | 815.47   |
| ## - 'Please specify: (choice=Hypertension)'                                           | 815.61   |
| ## - 'Please specify: (choice=Diabetes)'                                               | 815.76   |

```

## - 'Does the patient have a history of cancer?' 815.88
## - 'Please specify: (choice=Chronic Renal Insufficiency)' 815.98
## - 'Please specify: (choice=Coronary Artery Disease)' 816.06
## <none> 816.61
## - 'Please specify: (choice=Cirrhosis)' 819.31
## - 'Please specify: (choice=Congestive Heart Failure)' 820.86
## - 'Admission Date:' 828.27
## - 'Was plasma given to the patient during this admission?' 829.88
## - 'SIRS RR' 831.76
## - SIRS_WBC 832.37
## - 'Did the patient receive hemodialysis during this admission?' 834.96
## - 'COVID- Was hydroxychloroquine (Plaquenil) given during the patient's admission?' 838.18
## - 'Was the patient placed in a prone position during their admission?' 845.87
## - 'Age at Admission' 889.90
##
## Step: AIC=815.02
## death ~ 'Does the patient have a history of cancer?' + 'Please specify: (choice=Hypertension)' +
## 'Please specify: (choice=Coronary Artery Disease)' + 'Please specify: (choice=Congestive Heart Failure)' +
## 'Please specify: (choice=Chronic Obstructive Pulmonary Disease)' +
## 'Please specify: (choice=Chronic Renal Insufficiency)' +
## 'Please specify: (choice=Cirrhosis)' + 'Did the patient receive hemodialysis during this admission?' +
## 'Was plasma given to the patient during this admission?' +
## 'Was the patient placed in a prone position during their admission?' +
## 'COVID- Was hydroxychloroquine (Plaquenil) given during the patient's admission?' +
## 'Age at Admission' + Per_Capita + 'SIRS RR' + SIRS_WBC +
## 'Creatinine (if 0 = N/A)' + 'Admission Date:' + 'Please specify: (choice=Diabetes)' +
## 'SIRS TEMP' + 'Please specify: (choice=Chronic- Hepatitis C)'
##
##
## Df
## - 'Please specify: (choice=Chronic Obstructive Pulmonary Disease)' 1
## - Per_Capita 1
## - 'Please specify: (choice=Chronic- Hepatitis C)' 1
## - 'SIRS TEMP' 1
## - 'Creatinine (if 0 = N/A)' 1
## - 'Please specify: (choice=Hypertension)' 1
## - 'Please specify: (choice=Diabetes)' 1
## - 'Does the patient have a history of cancer?' 1
## - 'Please specify: (choice=Chronic Renal Insufficiency)' 1
## - 'Please specify: (choice=Coronary Artery Disease)' 1
## <none>
## - 'Please specify: (choice=Cirrhosis)' 1
## - 'Please specify: (choice=Congestive Heart Failure)' 1
## - 'Admission Date:' 1
## - 'Was plasma given to the patient during this admission?' 1
## - 'SIRS RR' 1
## - SIRS_WBC 1
## - 'Did the patient receive hemodialysis during this admission?' 1
## - 'COVID- Was hydroxychloroquine (Plaquenil) given during the patient's admission?' 1
## - 'Was the patient placed in a prone position during their admission?' 1
## - 'Age at Admission' 1
##
## Deviance
## - 'Please specify: (choice=Chronic Obstructive Pulmonary Disease)' 773.44
## - Per_Capita 773.48
## - 'Please specify: (choice=Chronic- Hepatitis C)' 773.91

```

```

## - 'SIRS TEMP' 773.91
## - 'Creatinine (if 0 = N/A)' 773.93
## - 'Please specify: (choice=Hypertension)' 773.98
## - 'Please specify: (choice=Diabetes)' 774.17
## - 'Does the patient have a history of cancer?' 774.22
## - 'Please specify: (choice=Chronic Renal Insufficiency)' 774.35
## - 'Please specify: (choice=Coronary Artery Disease)' 774.47
## <none> 773.02
## - 'Please specify: (choice=Cirrhosis)' 777.76
## - 'Please specify: (choice=Congestive Heart Failure)' 779.11
## - 'Admission Date:' 786.71
## - 'Was plasma given to the patient during this admission?' 788.67
## - 'SIRS RR' 790.09
## - SIRS_WBC 790.60
## - 'Did the patient receive hemodialysis during this admission?' 793.44
## - 'COVID- Was hydroxychloroquine (Plaquenil) given during the patient's admission?' 796.60
## - 'Was the patient placed in a prone position during their admission?' 804.15
## - 'Age at Admission' 850.70
## AIC
## - 'Please specify: (choice=Chronic Obstructive Pulmonary Disease)' 813.44
## - Per_Capita 813.48
## - 'Please specify: (choice=Chronic- Hepatitis C)' 813.91
## - 'SIRS TEMP' 813.91
## - 'Creatinine (if 0 = N/A)' 813.93
## - 'Please specify: (choice=Hypertension)' 813.98
## - 'Please specify: (choice=Diabetes)' 814.17
## - 'Does the patient have a history of cancer?' 814.22
## - 'Please specify: (choice=Chronic Renal Insufficiency)' 814.35
## - 'Please specify: (choice=Coronary Artery Disease)' 814.47
## <none> 815.02
## - 'Please specify: (choice=Cirrhosis)' 817.76
## - 'Please specify: (choice=Congestive Heart Failure)' 819.11
## - 'Admission Date:' 826.71
## - 'Was plasma given to the patient during this admission?' 828.67
## - 'SIRS RR' 830.09
## - SIRS_WBC 830.60
## - 'Did the patient receive hemodialysis during this admission?' 833.44
## - 'COVID- Was hydroxychloroquine (Plaquenil) given during the patient's admission?' 836.60
## - 'Was the patient placed in a prone position during their admission?' 844.15
## - 'Age at Admission' 890.70
##
## Step: AIC=813.44
## death ~ 'Does the patient have a history of cancer?' + 'Please specify: (choice=Hypertension)' +
## 'Please specify: (choice=Coronary Artery Disease)' + 'Please specify: (choice=Congestive Heart Failure)' +
## 'Please specify: (choice=Chronic Renal Insufficiency)' +
## 'Please specify: (choice=Cirrhosis)' + 'Did the patient receive hemodialysis during this admission?' +
## 'Was plasma given to the patient during this admission?' +
## 'Was the patient placed in a prone position during their admission?' +
## 'COVID- Was hydroxychloroquine (Plaquenil) given during the patient's admission?' +
## 'Age at Admission' + Per_Capita + 'SIRS RR' + SIRS_WBC +
## 'Creatinine (if 0 = N/A)' + 'Admission Date:' + 'Please specify: (choice=Diabetes)' +
## 'SIRS TEMP' + 'Please specify: (choice=Chronic- Hepatitis C)'
##
## Df

```

|                                                                                        |          |
|----------------------------------------------------------------------------------------|----------|
| ## - Per_Capita                                                                        | 1        |
| ## - 'SIRS TEMP'                                                                       | 1        |
| ## - 'Please specify: (choice=Chronic- Hepatitis C)'                                   | 1        |
| ## - 'Creatinine (if 0 = N/A)'                                                         | 1        |
| ## - 'Please specify: (choice=Hypertension)'                                           | 1        |
| ## - 'Please specify: (choice=Diabetes)'                                               | 1        |
| ## - 'Does the patient have a history of cancer?'                                      | 1        |
| ## - 'Please specify: (choice=Chronic Renal Insufficiency)'                            | 1        |
| ## - 'Please specify: (choice=Coronary Artery Disease)'                                | 1        |
| ## <none>                                                                              |          |
| ## - 'Please specify: (choice=Cirrhosis)'                                              | 1        |
| ## - 'Please specify: (choice=Congestive Heart Failure)'                               | 1        |
| ## - 'Admission Date:'                                                                 | 1        |
| ## - 'Was plasma given to the patient during this admission?'                          | 1        |
| ## - 'SIRS RR'                                                                         | 1        |
| ## - SIRS_WBC                                                                          | 1        |
| ## - 'Did the patient receive hemodialysis during this admission?'                     | 1        |
| ## - 'COVID- Was hydroxychloroquine (Plaquenil) given during the patient's admission?' | 1        |
| ## - 'Was the patient placed in a prone position during their admission?'              | 1        |
| ## - 'Age at Admission'                                                                | 1        |
| ##                                                                                     | Deviance |
| ## - Per_Capita                                                                        | 773.92   |
| ## - 'SIRS TEMP'                                                                       | 774.32   |
| ## - 'Please specify: (choice=Chronic- Hepatitis C)'                                   | 774.35   |
| ## - 'Creatinine (if 0 = N/A)'                                                         | 774.39   |
| ## - 'Please specify: (choice=Hypertension)'                                           | 774.42   |
| ## - 'Please specify: (choice=Diabetes)'                                               | 774.58   |
| ## - 'Does the patient have a history of cancer?'                                      | 774.61   |
| ## - 'Please specify: (choice=Chronic Renal Insufficiency)'                            | 774.83   |
| ## - 'Please specify: (choice=Coronary Artery Disease)'                                | 774.90   |
| ## <none>                                                                              | 773.44   |
| ## - 'Please specify: (choice=Cirrhosis)'                                              | 778.03   |
| ## - 'Please specify: (choice=Congestive Heart Failure)'                               | 780.31   |
| ## - 'Admission Date:'                                                                 | 787.04   |
| ## - 'Was plasma given to the patient during this admission?'                          | 788.92   |
| ## - 'SIRS RR'                                                                         | 791.06   |
| ## - SIRS_WBC                                                                          | 791.17   |
| ## - 'Did the patient receive hemodialysis during this admission?'                     | 793.64   |
| ## - 'COVID- Was hydroxychloroquine (Plaquenil) given during the patient's admission?' | 796.99   |
| ## - 'Was the patient placed in a prone position during their admission?'              | 804.55   |
| ## - 'Age at Admission'                                                                | 853.44   |
| ##                                                                                     | AIC      |
| ## - Per_Capita                                                                        | 811.92   |
| ## - 'SIRS TEMP'                                                                       | 812.32   |
| ## - 'Please specify: (choice=Chronic- Hepatitis C)'                                   | 812.35   |
| ## - 'Creatinine (if 0 = N/A)'                                                         | 812.39   |
| ## - 'Please specify: (choice=Hypertension)'                                           | 812.42   |
| ## - 'Please specify: (choice=Diabetes)'                                               | 812.58   |
| ## - 'Does the patient have a history of cancer?'                                      | 812.61   |
| ## - 'Please specify: (choice=Chronic Renal Insufficiency)'                            | 812.83   |
| ## - 'Please specify: (choice=Coronary Artery Disease)'                                | 812.90   |
| ## <none>                                                                              | 813.44   |
| ## - 'Please specify: (choice=Cirrhosis)'                                              | 816.03   |
| ## - 'Please specify: (choice=Congestive Heart Failure)'                               | 818.31   |

```

## - 'Admission Date:' 825.04
## - 'Was plasma given to the patient during this admission?' 826.92
## - 'SIRS RR' 829.06
## - SIRS_WBC 829.17
## - 'Did the patient receive hemodialysis during this admission?' 831.64
## - 'COVID- Was hydroxychloroquine (Plaquenil) given during the patient's admission?' 834.99
## - 'Was the patient placed in a prone position during their admission?' 842.55
## - 'Age at Admission' 891.44
##
## Step: AIC=811.92
## death ~ 'Does the patient have a history of cancer?' + 'Please specify: (choice=Hypertension)' +
## 'Please specify: (choice=Coronary Artery Disease)' + 'Please specify: (choice=Congestive Heart F
## 'Please specify: (choice=Chronic Renal Insufficiency)' +
## 'Please specify: (choice=Cirrhosis)' + 'Did the patient receive hemodialysis during this admissi
## 'Was plasma given to the patient during this admission?' +
## 'Was the patient placed in a prone position during their admission?' +
## 'COVID- Was hydroxychloroquine (Plaquenil) given during the patient's admission?' +
## 'Age at Admission' + 'SIRS RR' + SIRS_WBC + 'Creatinine (if 0 = N/A)' +
## 'Admission Date:' + 'Please specify: (choice=Diabetes)' +
## 'SIRS TEMP' + 'Please specify: (choice=Chronic- Hepatitis C)'
##
##
## Df
## - 'SIRS TEMP' 1
## - 'Please specify: (choice=Chronic- Hepatitis C)' 1
## - 'Creatinine (if 0 = N/A)' 1
## - 'Please specify: (choice=Hypertension)' 1
## - 'Does the patient have a history of cancer?' 1
## - 'Please specify: (choice=Diabetes)' 1
## - 'Please specify: (choice=Chronic Renal Insufficiency)' 1
## - 'Please specify: (choice=Coronary Artery Disease)' 1
## <none>
## - 'Please specify: (choice=Cirrhosis)' 1
## - 'Please specify: (choice=Congestive Heart Failure)' 1
## - 'Admission Date:' 1
## - 'Was plasma given to the patient during this admission?' 1
## - 'SIRS RR' 1
## - SIRS_WBC 1
## - 'Did the patient receive hemodialysis during this admission?' 1
## - 'COVID- Was hydroxychloroquine (Plaquenil) given during the patient's admission?' 1
## - 'Was the patient placed in a prone position during their admission?' 1
## - 'Age at Admission' 1
##
## Deviance
## - 'SIRS TEMP' 774.75
## - 'Please specify: (choice=Chronic- Hepatitis C)' 774.78
## - 'Creatinine (if 0 = N/A)' 774.78
## - 'Please specify: (choice=Hypertension)' 774.81
## - 'Does the patient have a history of cancer?' 775.04
## - 'Please specify: (choice=Diabetes)' 775.19
## - 'Please specify: (choice=Chronic Renal Insufficiency)' 775.45
## - 'Please specify: (choice=Coronary Artery Disease)' 775.51
## <none> 773.92
## - 'Please specify: (choice=Cirrhosis)' 778.54
## - 'Please specify: (choice=Congestive Heart Failure)' 780.53
## - 'Admission Date:' 787.71

```

```

## - 'Was plasma given to the patient during this admission?' 789.39
## - 'SIRS RR' 791.43
## - SIRS_WBC 791.80
## - 'Did the patient receive hemodialysis during this admission?' 794.48
## - 'COVID- Was hydroxychloroquine (Plaquenil) given during the patient's admission?' 797.42
## - 'Was the patient placed in a prone position during their admission?' 804.82
## - 'Age at Admission' 860.11
## AIC
## - 'SIRS TEMP' 810.75
## - 'Please specify: (choice=Chronic- Hepatitis C)' 810.78
## - 'Creatinine (if 0 = N/A)' 810.78
## - 'Please specify: (choice=Hypertension)' 810.81
## - 'Does the patient have a history of cancer?' 811.04
## - 'Please specify: (choice=Diabetes)' 811.19
## - 'Please specify: (choice=Chronic Renal Insufficiency)' 811.45
## - 'Please specify: (choice=Coronary Artery Disease)' 811.51
## <none> 811.92
## - 'Please specify: (choice=Cirrhosis)' 814.54
## - 'Please specify: (choice=Congestive Heart Failure)' 816.53
## - 'Admission Date:' 823.71
## - 'Was plasma given to the patient during this admission?' 825.39
## - 'SIRS RR' 827.43
## - SIRS_WBC 827.80
## - 'Did the patient receive hemodialysis during this admission?' 830.48
## - 'COVID- Was hydroxychloroquine (Plaquenil) given during the patient's admission?' 833.42
## - 'Was the patient placed in a prone position during their admission?' 840.82
## - 'Age at Admission' 896.11
##
## Step: AIC=810.75
## death ~ 'Does the patient have a history of cancer?' + 'Please specify: (choice=Hypertension)' +
## 'Please specify: (choice=Coronary Artery Disease)' + 'Please specify: (choice=Congestive Heart Failure)' +
## 'Please specify: (choice=Chronic Renal Insufficiency)' +
## 'Please specify: (choice=Cirrhosis)' + 'Did the patient receive hemodialysis during this admission?' +
## 'Was plasma given to the patient during this admission?' +
## 'Was the patient placed in a prone position during their admission?' +
## 'COVID- Was hydroxychloroquine (Plaquenil) given during the patient's admission?' +
## 'Age at Admission' + 'SIRS RR' + SIRS_WBC + 'Creatinine (if 0 = N/A)' +
## 'Admission Date:' + 'Please specify: (choice=Diabetes)' +
## 'Please specify: (choice=Chronic- Hepatitis C)'
##
## Df
## - 'Please specify: (choice=Chronic- Hepatitis C)' 1
## - 'Please specify: (choice=Hypertension)' 1
## - 'Creatinine (if 0 = N/A)' 1
## - 'Does the patient have a history of cancer?' 1
## - 'Please specify: (choice=Diabetes)' 1
## - 'Please specify: (choice=Chronic Renal Insufficiency)' 1
## - 'Please specify: (choice=Coronary Artery Disease)' 1
## <none>
## - 'Please specify: (choice=Cirrhosis)' 1
## - 'Please specify: (choice=Congestive Heart Failure)' 1
## - 'Admission Date:' 1
## - 'Was plasma given to the patient during this admission?' 1
## - 'SIRS RR' 1

```

```

## - SIRS_WBC 1
## - 'Did the patient receive hemodialysis during this admission?' 1
## - 'COVID- Was hydroxychloroquine (Plaquenil) given during the patient's admission?' 1
## - 'Was the patient placed in a prone position during their admission?' 1
## - 'Age at Admission' 1
## Deviance
## - 'Please specify: (choice=Chronic- Hepatitis C)' 775.53
## - 'Please specify: (choice=Hypertension)' 775.60
## - 'Creatinine (if 0 = N/A)' 775.61
## - 'Does the patient have a history of cancer?' 775.90
## - 'Please specify: (choice=Diabetes)' 776.00
## - 'Please specify: (choice=Chronic Renal Insufficiency)' 776.20
## - 'Please specify: (choice=Coronary Artery Disease)' 776.30
## <none> 774.75
## - 'Please specify: (choice=Cirrhosis)' 779.38
## - 'Please specify: (choice=Congestive Heart Failure)' 781.44
## - 'Admission Date:' 789.59
## - 'Was plasma given to the patient during this admission?' 790.41
## - 'SIRS RR' 792.17
## - SIRS_WBC 792.86
## - 'Did the patient receive hemodialysis during this admission?' 795.07
## - 'COVID- Was hydroxychloroquine (Plaquenil) given during the patient's admission?' 798.51
## - 'Was the patient placed in a prone position during their admission?' 805.51
## - 'Age at Admission' 860.24
## AIC
## - 'Please specify: (choice=Chronic- Hepatitis C)' 809.53
## - 'Please specify: (choice=Hypertension)' 809.60
## - 'Creatinine (if 0 = N/A)' 809.61
## - 'Does the patient have a history of cancer?' 809.90
## - 'Please specify: (choice=Diabetes)' 810.00
## - 'Please specify: (choice=Chronic Renal Insufficiency)' 810.20
## - 'Please specify: (choice=Coronary Artery Disease)' 810.30
## <none> 810.75
## - 'Please specify: (choice=Cirrhosis)' 813.38
## - 'Please specify: (choice=Congestive Heart Failure)' 815.44
## - 'Admission Date:' 823.59
## - 'Was plasma given to the patient during this admission?' 824.41
## - 'SIRS RR' 826.17
## - SIRS_WBC 826.86
## - 'Did the patient receive hemodialysis during this admission?' 829.07
## - 'COVID- Was hydroxychloroquine (Plaquenil) given during the patient's admission?' 832.51
## - 'Was the patient placed in a prone position during their admission?' 839.51
## - 'Age at Admission' 894.24
##
## Step: AIC=809.53
## death ~ 'Does the patient have a history of cancer?' + 'Please specify: (choice=Hypertension)' +
## 'Please specify: (choice=Coronary Artery Disease)' + 'Please specify: (choice=Congestive Heart Failure)'
## 'Please specify: (choice=Chronic Renal Insufficiency)' +
## 'Please specify: (choice=Cirrhosis)' + 'Did the patient receive hemodialysis during this admission?'
## 'Was plasma given to the patient during this admission?' +
## 'Was the patient placed in a prone position during their admission?' +
## 'COVID- Was hydroxychloroquine (Plaquenil) given during the patient's admission?' +
## 'Age at Admission' + 'SIRS RR' + SIRS_WBC + 'Creatinine (if 0 = N/A)' +
## 'Admission Date:' + 'Please specify: (choice=Diabetes)'

```



|                                                                                        |          |
|----------------------------------------------------------------------------------------|----------|
| ##                                                                                     |          |
| ##                                                                                     |          |
| ## - 'Creatinine (if 0 = N/A)'                                                         | Df       |
| ## - 'Please specify: (choice=Hypertension)'                                           | 1        |
| ## - 'Please specify: (choice=Diabetes)'                                               | 1        |
| ## - 'Does the patient have a history of cancer?'                                      | 1        |
| ## - 'Please specify: (choice=Chronic Renal Insufficiency)'                            | 1        |
| ## - 'Please specify: (choice=Coronary Artery Disease)'                                | 1        |
| ## <none>                                                                              |          |
| ## - 'Please specify: (choice=Cirrhosis)'                                              | 1        |
| ## - 'Please specify: (choice=Congestive Heart Failure)'                               | 1        |
| ## - 'Admission Date:'                                                                 | 1        |
| ## - 'Was plasma given to the patient during this admission?'                          | 1        |
| ## - 'SIRS RR'                                                                         | 1        |
| ## - SIRS_WBC                                                                          | 1        |
| ## - 'Did the patient receive hemodialysis during this admission?'                     | 1        |
| ## - 'COVID- Was hydroxychloroquine (Plaquenil) given during the patient's admission?' | 1        |
| ## - 'Was the patient placed in a prone position during their admission?'              | 1        |
| ## - 'Age at Admission'                                                                | 1        |
| ##                                                                                     |          |
| ##                                                                                     | Deviance |
| ## - 'Creatinine (if 0 = N/A)'                                                         | 776.33   |
| ## - 'Please specify: (choice=Hypertension)'                                           | 776.43   |
| ## - 'Please specify: (choice=Diabetes)'                                               | 776.69   |
| ## - 'Does the patient have a history of cancer?'                                      | 776.80   |
| ## - 'Please specify: (choice=Chronic Renal Insufficiency)'                            | 776.92   |
| ## - 'Please specify: (choice=Coronary Artery Disease)'                                | 777.14   |
| ## <none>                                                                              | 775.53   |
| ## - 'Please specify: (choice=Cirrhosis)'                                              | 781.63   |
| ## - 'Please specify: (choice=Congestive Heart Failure)'                               | 782.12   |
| ## - 'Admission Date:'                                                                 | 790.01   |
| ## - 'Was plasma given to the patient during this admission?'                          | 791.48   |
| ## - 'SIRS RR'                                                                         | 792.57   |
| ## - SIRS_WBC                                                                          | 793.56   |
| ## - 'Did the patient receive hemodialysis during this admission?'                     | 796.00   |
| ## - 'COVID- Was hydroxychloroquine (Plaquenil) given during the patient's admission?' | 799.78   |
| ## - 'Was the patient placed in a prone position during their admission?'              | 806.20   |
| ## - 'Age at Admission'                                                                | 860.56   |
| ##                                                                                     |          |
| ##                                                                                     | AIC      |
| ## - 'Creatinine (if 0 = N/A)'                                                         | 808.33   |
| ## - 'Please specify: (choice=Hypertension)'                                           | 808.43   |
| ## - 'Please specify: (choice=Diabetes)'                                               | 808.69   |
| ## - 'Does the patient have a history of cancer?'                                      | 808.80   |
| ## - 'Please specify: (choice=Chronic Renal Insufficiency)'                            | 808.92   |
| ## - 'Please specify: (choice=Coronary Artery Disease)'                                | 809.14   |
| ## <none>                                                                              | 809.53   |
| ## - 'Please specify: (choice=Cirrhosis)'                                              | 813.63   |
| ## - 'Please specify: (choice=Congestive Heart Failure)'                               | 814.12   |
| ## - 'Admission Date:'                                                                 | 822.01   |
| ## - 'Was plasma given to the patient during this admission?'                          | 823.48   |
| ## - 'SIRS RR'                                                                         | 824.57   |
| ## - SIRS_WBC                                                                          | 825.56   |
| ## - 'Did the patient receive hemodialysis during this admission?'                     | 828.00   |
| ## - 'COVID- Was hydroxychloroquine (Plaquenil) given during the patient's admission?' | 831.78   |
| ## - 'Was the patient placed in a prone position during their admission?'              | 838.20   |

```

## - 'Age at Admission' 892.56
##
## Step: AIC=808.33
## death ~ 'Does the patient have a history of cancer?' + 'Please specify: (choice=Hypertension)' +
## 'Please specify: (choice=Coronary Artery Disease)' + 'Please specify: (choice=Congestive Heart F
## 'Please specify: (choice=Chronic Renal Insufficiency)' +
## 'Please specify: (choice=Cirrhosis)' + 'Did the patient receive hemodialysis during this admissi
## 'Was plasma given to the patient during this admission?' +
## 'Was the patient placed in a prone position during their admission?' +
## 'COVID- Was hydroxychloroquine (Plaquenil) given during the patient's admission?' +
## 'Age at Admission' + 'SIRS RR' + SIRS_WBC + 'Admission Date:' +
## 'Please specify: (choice=Diabetes)'
##
##
## Df
## - 'Please specify: (choice=Diabetes)' 1
## - 'Please specify: (choice=Hypertension)' 1
## - 'Does the patient have a history of cancer?' 1
## - 'Please specify: (choice=Coronary Artery Disease)' 1
## - 'Please specify: (choice=Chronic Renal Insufficiency)' 1
## <none>
## - 'Please specify: (choice=Cirrhosis)' 1
## - 'Please specify: (choice=Congestive Heart Failure)' 1
## - 'Admission Date:' 1
## - 'Was plasma given to the patient during this admission?' 1
## - 'SIRS RR' 1
## - SIRS_WBC 1
## - 'COVID- Was hydroxychloroquine (Plaquenil) given during the patient's admission?' 1
## - 'Did the patient receive hemodialysis during this admission?' 1
## - 'Was the patient placed in a prone position during their admission?' 1
## - 'Age at Admission' 1
##
## Deviance
## - 'Please specify: (choice=Diabetes)' 777.33
## - 'Please specify: (choice=Hypertension)' 777.41
## - 'Does the patient have a history of cancer?' 777.57
## - 'Please specify: (choice=Coronary Artery Disease)' 778.01
## - 'Please specify: (choice=Chronic Renal Insufficiency)' 778.03
## <none> 776.33
## - 'Please specify: (choice=Cirrhosis)' 782.59
## - 'Please specify: (choice=Congestive Heart Failure)' 783.35
## - 'Admission Date:' 790.99
## - 'Was plasma given to the patient during this admission?' 791.63
## - 'SIRS RR' 793.56
## - SIRS_WBC 795.07
## - 'COVID- Was hydroxychloroquine (Plaquenil) given during the patient's admission?' 800.09
## - 'Did the patient receive hemodialysis during this admission?' 803.06
## - 'Was the patient placed in a prone position during their admission?' 806.40
## - 'Age at Admission' 861.19
##
## AIC
## - 'Please specify: (choice=Diabetes)' 807.33
## - 'Please specify: (choice=Hypertension)' 807.41
## - 'Does the patient have a history of cancer?' 807.57
## - 'Please specify: (choice=Coronary Artery Disease)' 808.01
## - 'Please specify: (choice=Chronic Renal Insufficiency)' 808.03
## <none> 808.33

```

```

## - 'Please specify: (choice=Cirrhosis)' 812.59
## - 'Please specify: (choice=Congestive Heart Failure)' 813.35
## - 'Admission Date:' 820.99
## - 'Was plasma given to the patient during this admission?' 821.63
## - 'SIRS RR' 823.56
## - SIRS_WBC 825.07
## - 'COVID- Was hydroxychloroquine (Plaquenil) given during the patient's admission?' 830.09
## - 'Did the patient receive hemodialysis during this admission?' 833.06
## - 'Was the patient placed in a prone position during their admission?' 836.40
## - 'Age at Admission' 891.19
##
## Step: AIC=807.33
## death ~ 'Does the patient have a history of cancer?' + 'Please specify: (choice=Hypertension)' +
## 'Please specify: (choice=Coronary Artery Disease)' + 'Please specify: (choice=Congestive Heart Failure)' +
## 'Please specify: (choice=Chronic Renal Insufficiency)' +
## 'Please specify: (choice=Cirrhosis)' + 'Did the patient receive hemodialysis during this admission?' +
## 'Was plasma given to the patient during this admission?' +
## 'Was the patient placed in a prone position during their admission?' +
## 'COVID- Was hydroxychloroquine (Plaquenil) given during the patient's admission?' +
## 'Age at Admission' + 'SIRS RR' + SIRS_WBC + 'Admission Date:'
##
##
## Df
## - 'Please specify: (choice=Hypertension)' 1
## - 'Does the patient have a history of cancer?' 1
## - 'Please specify: (choice=Coronary Artery Disease)' 1
## - 'Please specify: (choice=Chronic Renal Insufficiency)' 1
## <none>
## - 'Please specify: (choice=Cirrhosis)' 1
## - 'Please specify: (choice=Congestive Heart Failure)' 1
## - 'Admission Date:' 1
## - 'Was plasma given to the patient during this admission?' 1
## - 'SIRS RR' 1
## - SIRS_WBC 1
## - 'COVID- Was hydroxychloroquine (Plaquenil) given during the patient's admission?' 1
## - 'Did the patient receive hemodialysis during this admission?' 1
## - 'Was the patient placed in a prone position during their admission?' 1
## - 'Age at Admission' 1
##
## Deviance
## - 'Please specify: (choice=Hypertension)' 778.03
## - 'Does the patient have a history of cancer?' 778.65
## - 'Please specify: (choice=Coronary Artery Disease)' 778.77
## - 'Please specify: (choice=Chronic Renal Insufficiency)' 778.93
## <none> 777.33
## - 'Please specify: (choice=Cirrhosis)' 783.15
## - 'Please specify: (choice=Congestive Heart Failure)' 783.99
## - 'Admission Date:' 792.02
## - 'Was plasma given to the patient during this admission?' 792.72
## - 'SIRS RR' 794.25
## - SIRS_WBC 796.32
## - 'COVID- Was hydroxychloroquine (Plaquenil) given during the patient's admission?' 800.60
## - 'Did the patient receive hemodialysis during this admission?' 803.47
## - 'Was the patient placed in a prone position during their admission?' 808.02
## - 'Age at Admission' 863.40
##
## AIC

```

```

## - 'Please specify: (choice=Hypertension)' 806.03
## - 'Does the patient have a history of cancer?' 806.65
## - 'Please specify: (choice=Coronary Artery Disease)' 806.77
## - 'Please specify: (choice=Chronic Renal Insufficiency)' 806.93
## <none> 807.33
## - 'Please specify: (choice=Cirrhosis)' 811.15
## - 'Please specify: (choice=Congestive Heart Failure)' 811.99
## - 'Admission Date:' 820.02
## - 'Was plasma given to the patient during this admission?' 820.72
## - 'SIRS RR' 822.25
## - SIRS_WBC 824.32
## - 'COVID- Was hydroxychloroquine (Plaquenil) given during the patient's admission?' 828.60
## - 'Did the patient receive hemodialysis during this admission?' 831.47
## - 'Was the patient placed in a prone position during their admission?' 836.02
## - 'Age at Admission' 891.40
##
## Step: AIC=806.03
## death ~ 'Does the patient have a history of cancer?' + 'Please specify: (choice=Coronary Artery Disea
## 'Please specify: (choice=Congestive Heart Failure)' + 'Please specify: (choice=Chronic Renal Insu
## 'Please specify: (choice=Cirrhosis)' + 'Did the patient receive hemodialysis during this admissi
## 'Was plasma given to the patient during this admission?' +
## 'Was the patient placed in a prone position during their admission?' +
## 'COVID- Was hydroxychloroquine (Plaquenil) given during the patient's admission?' +
## 'Age at Admission' + 'SIRS RR' + SIRS_WBC + 'Admission Date:'
##
##
## Df
## - 'Does the patient have a history of cancer?' 1
## - 'Please specify: (choice=Coronary Artery Disease)' 1
## - 'Please specify: (choice=Chronic Renal Insufficiency)' 1
## <none>
## - 'Please specify: (choice=Cirrhosis)' 1
## - 'Please specify: (choice=Congestive Heart Failure)' 1
## - 'Admission Date:' 1
## - 'Was plasma given to the patient during this admission?' 1
## - 'SIRS RR' 1
## - SIRS_WBC 1
## - 'COVID- Was hydroxychloroquine (Plaquenil) given during the patient's admission?' 1
## - 'Did the patient receive hemodialysis during this admission?' 1
## - 'Was the patient placed in a prone position during their admission?' 1
## - 'Age at Admission' 1
##
## Deviance
## - 'Does the patient have a history of cancer?' 779.34
## - 'Please specify: (choice=Coronary Artery Disease)' 779.73
## - 'Please specify: (choice=Chronic Renal Insufficiency)' 779.93
## <none> 778.03
## - 'Please specify: (choice=Cirrhosis)' 783.92
## - 'Please specify: (choice=Congestive Heart Failure)' 784.68
## - 'Admission Date:' 792.81
## - 'Was plasma given to the patient during this admission?' 793.27
## - 'SIRS RR' 794.78
## - SIRS_WBC 796.86
## - 'COVID- Was hydroxychloroquine (Plaquenil) given during the patient's admission?' 801.11
## - 'Did the patient receive hemodialysis during this admission?' 804.96
## - 'Was the patient placed in a prone position during their admission?' 808.70

```

```

## - 'Age at Admission' 871.15
## AIC
## - 'Does the patient have a history of cancer?' 805.34
## - 'Please specify: (choice=Coronary Artery Disease)' 805.73
## - 'Please specify: (choice=Chronic Renal Insufficiency)' 805.93
## <none> 806.03
## - 'Please specify: (choice=Cirrhosis)' 809.92
## - 'Please specify: (choice=Congestive Heart Failure)' 810.68
## - 'Admission Date:' 818.81
## - 'Was plasma given to the patient during this admission?' 819.27
## - 'SIRS RR' 820.78
## - SIRS_WBC 822.86
## - 'COVID- Was hydroxychloroquine (Plaquenil) given during the patient's admission?' 827.11
## - 'Did the patient receive hemodialysis during this admission?' 830.96
## - 'Was the patient placed in a prone position during their admission?' 834.70
## - 'Age at Admission' 897.15
##
## Step: AIC=805.34
## death ~ 'Please specify: (choice=Coronary Artery Disease)' +
## 'Please specify: (choice=Congestive Heart Failure)' + 'Please specify: (choice=Chronic Renal Insufficiency)' +
## 'Please specify: (choice=Cirrhosis)' + 'Did the patient receive hemodialysis during this admission?' +
## 'Was plasma given to the patient during this admission?' +
## 'Was the patient placed in a prone position during their admission?' +
## 'COVID- Was hydroxychloroquine (Plaquenil) given during the patient's admission?' +
## 'Age at Admission' + 'SIRS RR' + SIRS_WBC + 'Admission Date:'
##
## Df
## - 'Please specify: (choice=Coronary Artery Disease)' 1
## <none>
## - 'Please specify: (choice=Chronic Renal Insufficiency)' 1
## - 'Please specify: (choice=Cirrhosis)' 1
## - 'Please specify: (choice=Congestive Heart Failure)' 1
## - 'Admission Date:' 1
## - 'Was plasma given to the patient during this admission?' 1
## - 'SIRS RR' 1
## - SIRS_WBC 1
## - 'COVID- Was hydroxychloroquine (Plaquenil) given during the patient's admission?' 1
## - 'Did the patient receive hemodialysis during this admission?' 1
## - 'Was the patient placed in a prone position during their admission?' 1
## - 'Age at Admission' 1
## Deviance
## - 'Please specify: (choice=Coronary Artery Disease)' 781.14
## <none> 779.34
## - 'Please specify: (choice=Chronic Renal Insufficiency)' 781.57
## - 'Please specify: (choice=Cirrhosis)' 785.11
## - 'Please specify: (choice=Congestive Heart Failure)' 785.69
## - 'Admission Date:' 793.61
## - 'Was plasma given to the patient during this admission?' 794.24
## - 'SIRS RR' 796.12
## - SIRS_WBC 799.19
## - 'COVID- Was hydroxychloroquine (Plaquenil) given during the patient's admission?' 802.85
## - 'Did the patient receive hemodialysis during this admission?' 805.48
## - 'Was the patient placed in a prone position during their admission?' 809.37
## - 'Age at Admission' 877.26

```

```

##                                                    AIC
## - 'Please specify: (choice=Coronary Artery Disease)' 805.14
## <none> 805.34
## - 'Please specify: (choice=Chronic Renal Insufficiency)' 805.57
## - 'Please specify: (choice=Cirrhosis)' 809.11
## - 'Please specify: (choice=Congestive Heart Failure)' 809.69
## - 'Admission Date:' 817.61
## - 'Was plasma given to the patient during this admission?' 818.24
## - 'SIRS RR' 820.12
## - SIRS_WBC 823.19
## - 'COVID- Was hydroxychloroquine (Plaquenil) given during the patient's admission?' 826.85
## - 'Did the patient receive hemodialysis during this admission?' 829.48
## - 'Was the patient placed in a prone position during their admission?' 833.37
## - 'Age at Admission' 901.26
##
## Step: AIC=805.14
## death ~ 'Please specify: (choice=Congestive Heart Failure)' +
##   'Please specify: (choice=Chronic Renal Insufficiency)' +
##   'Please specify: (choice=Cirrhosis)' + 'Did the patient receive hemodialysis during this admission?' +
##   'Was plasma given to the patient during this admission?' +
##   'Was the patient placed in a prone position during their admission?' +
##   'COVID- Was hydroxychloroquine (Plaquenil) given during the patient's admission?' +
##   'Age at Admission' + 'SIRS RR' + SIRS_WBC + 'Admission Date:'
##
##                                                    Df
## <none>
## - 'Please specify: (choice=Chronic Renal Insufficiency)' 1
## - 'Please specify: (choice=Cirrhosis)' 1
## - 'Please specify: (choice=Congestive Heart Failure)' 1
## - 'Admission Date:' 1
## - 'Was plasma given to the patient during this admission?' 1
## - 'SIRS RR' 1
## - SIRS_WBC 1
## - 'COVID- Was hydroxychloroquine (Plaquenil) given during the patient's admission?' 1
## - 'Did the patient receive hemodialysis during this admission?' 1
## - 'Was the patient placed in a prone position during their admission?' 1
## - 'Age at Admission' 1
##
##                                                    Deviance
## <none> 781.14
## - 'Please specify: (choice=Chronic Renal Insufficiency)' 783.53
## - 'Please specify: (choice=Cirrhosis)' 786.53
## - 'Please specify: (choice=Congestive Heart Failure)' 789.92
## - 'Admission Date:' 794.85
## - 'Was plasma given to the patient during this admission?' 796.33
## - 'SIRS RR' 797.05
## - SIRS_WBC 801.23
## - 'COVID- Was hydroxychloroquine (Plaquenil) given during the patient's admission?' 805.07
## - 'Did the patient receive hemodialysis during this admission?' 807.62
## - 'Was the patient placed in a prone position during their admission?' 811.21
## - 'Age at Admission' 890.65
##
##                                                    AIC
## <none> 805.14
## - 'Please specify: (choice=Chronic Renal Insufficiency)' 805.53
## - 'Please specify: (choice=Cirrhosis)' 808.53

```

```
## - 'Please specify: (choice=Congestive Heart Failure)' 811.92
## - 'Admission Date:' 816.85
## - 'Was plasma given to the patient during this admission?' 818.33
## - 'SIRS RR' 819.05
## - SIRS_WBC 823.23
## - 'COVID- Was hydroxychloroquine (Plaquenil) given during the patient's admission?' 827.07
## - 'Did the patient receive hemodialysis during this admission?' 829.62
## - 'Was the patient placed in a prone position during their admission?' 833.21
## - 'Age at Admission' 912.65
```

```
##
```

```
## Call: glm(formula = death ~ 'Please specify: (choice=Congestive Heart Failure)' +
## 'Please specify: (choice=Chronic Renal Insufficiency)' +
## 'Please specify: (choice=Cirrhosis)' + 'Did the patient receive hemodialysis during this admission?' +
## 'Was plasma given to the patient during this admission?' +
## 'Was the patient placed in a prone position during their admission?' +
## 'COVID- Was hydroxychloroquine (Plaquenil) given during the patient's admission?' +
## 'Age at Admission' + 'SIRS RR' + SIRS_WBC + 'Admission Date:',
## family = binomial, data = complete.df.minus.labs)
```

```
##
```

```
## Coefficients:
```

```
## (Intercept)
## 473.49870
## 'Please specify: (choice=Congestive Heart Failure)'1
## 1.01369
## 'Please specify: (choice=Chronic Renal Insufficiency)'1
## 0.47631
## 'Please specify: (choice=Cirrhosis)'1
## 1.90178
## 'Did the patient receive hemodialysis during this admission?'1
## 1.59933
## 'Was plasma given to the patient during this admission?'1
## 1.07010
## 'Was the patient placed in a prone position during their admission?'1
## 1.25059
## 'COVID- Was hydroxychloroquine (Plaquenil) given during the patient's admission?'1
## 0.99830
## 'Age at Admission'
## 0.06572
## 'SIRS RR'
## 0.84886
## SIRS_WBC
## 0.91056
## 'Admission Date:'
## -0.02621
##
```

```
## Degrees of Freedom: 991 Total (i.e. Null); 980 Residual
```

```
## Null Deviance: 1072
```

```
## Residual Deviance: 781.1 AIC: 805.1
```

```
best.step.2 = glm(formula = death ~ 'Please specify: (choice=Congestive Heart Failure)' +
'Please specify: (choice=Chronic Renal Insufficiency)' +
'Please specify: (choice=Cirrhosis)' + 'Did the patient receive hemodialysis during this admission?' +
'Was plasma given to the patient during this admission?' +
```

```

'Was the patient placed in a prone position during their admission?' +
'COVID- Was hydroxychloroquine (Plaquenil) given during the patient's admission?' +
'Age at Admission' + 'SIRS RR' + SIRS_WBC + 'Admission Date:',
family = binomial, data = complete.df.minus.labs) # AIC is equal to 805
best.step.2.summary = summary(best.step.2)

best.step.2.summary.p.values = best.step.2.summary$coefficients[,4]
best.step.2.conf.intervals = exp(cbind(coef(best.step.2), confint(best.step.2)))

## Waiting for profiling to be done...

best.step.2.conf.intervals.df = data.frame(best.step.2.conf.intervals)
best.step.2.conf.intervals.df$p.values = best.step.2.summary.p.values

logitgof(under.0.25.variables.no.redcap.no.labs.death, fitted(best.step.2), g = 10) # 0.09253

## Warning in logitgof(under.0.25.variables.no.redcap.no.labs.death,
## fitted(best.step.2), : At least one cell in the expected frequencies table is <
## 1. Chi-square approximation may be incorrect.

##
## Hosmer and Lemeshow test (binary model)
##
## data: under.0.25.variables.no.redcap.no.labs.death, fitted(best.step.2)
## X-squared = 13.609, df = 8, p-value = 0.09253

## were there any predictors of mortality within those who got plasma?

## MODEL 4a
row.names(complete.df) <- 1:nrow(complete.df)

# removed: 'Was the patient intubated when plasma was given?', because only on one side
my.full.match = matchit('Was plasma given to the patient during this admission?' ~ 'Insurance Class' +

## Warning in model.matrix.default(tt, data = mf): the response appeared on the
## right-hand side and was dropped

## Warning in model.matrix.default(tt, data = mf): problem with term 12 in
## model.matrix: no columns are assigned

## Warning in model.matrix.default(mt, mf, contrasts): the response appeared on the
## right-hand side and was dropped

## Warning in model.matrix.default(mt, mf, contrasts): problem with term 12 in
## model.matrix: no columns are assigned

summary(my.full.match)

```



```

##
## Call:
## matchit(formula = 'Was plasma given to the patient during this admission?' ~
##   'Insurance Class' + 'Race:' + 'Does the patient have a history of cancer?' +
##   'Please specify: (choice=Hypertension)' + 'Please specify: (choice=Coronary Artery Disease)' +
##   'Please specify: (choice=Congestive Heart Failure)' +
##   'Please specify: (choice=Asthma)' + 'Please specify: (choice=Chronic Obstructive Pulmonary D
##   'Please specify: (choice=Chronic Renal Insufficiency)' +
##   'Please specify: (choice=Cirrhosis)' + 'Did the patient receive hemodialysis during this adm
##   'Was plasma given to the patient during this admission?' +
##   'Was the patient placed in a prone position during their admission?' +
##   'COVID- Was hydroxychloroquine (Plaquenil) given during the patient's admission?' +
##   'Age at Admission' + Per_Capita + 'SIRS RR' + SIRS_WBC +
##   SIRS...110 + 'Creatinine (if 0 = N/A)' + Ferritin + CRP +
##   'D-Domer' + 'Admission Date:' + 'Please specify: (choice=Diabetes)' +
##   'SIRS TEMP' + 'Please specify: (choice=Chronic- Hepatitis C)',
##   data = complete.df, method = "nearest")
##
## Summary of balance for all data:
##
##
## distance
## 'Insurance Class'COMM
## 'Insurance Class'MEDICAID
## 'Insurance Class'MEDICARE
## 'Insurance Class'OTHER
## 'Insurance Class'SP
## 'Race:'American Indian/Alaskan Native
## 'Race:'Asian
## 'Race:'Black
## 'Race:'Native Hawaiian/Pacific Isle
## 'Race:'Other
## 'Race:'Unknown
## 'Does the patient have a history of cancer?'1
## 'Please specify: (choice=Hypertension)'1
## 'Please specify: (choice=Coronary Artery Disease)'1
## 'Please specify: (choice=Congestive Heart Failure)'1
## 'Please specify: (choice=Asthma)'1
## 'Please specify: (choice=Chronic Obstructive Pulmonary Disease)'1
## 'Please specify: (choice=Chronic Renal Insufficiency)'1
## 'Please specify: (choice=Cirrhosis)'1
## 'Did the patient receive hemodialysis during this admission?'1
## 'Was the patient placed in a prone position during their admission?'1
## 'COVID- Was hydroxychloroquine (Plaquenil) given during the patient's admission?'1
## 'Age at Admission'
## Per_Capita
## 'SIRS RR'
## SIRS_WBC
## SIRS...110
## 'Creatinine (if 0 = N/A)'
## Ferritin
## CRP
## 'D-Domer'
## 'Admission Date:'
## 'Please specify: (choice=Diabetes)'1

```

|                                                                                    | Means Treated |
|------------------------------------------------------------------------------------|---------------|
| distance                                                                           | 0.4025        |
| 'Insurance Class'COMM                                                              | 0.2787        |
| 'Insurance Class'MEDICAID                                                          | 0.2131        |
| 'Insurance Class'MEDICARE                                                          | 0.5082        |
| 'Insurance Class'OTHER                                                             | 0.0000        |
| 'Insurance Class'SP                                                                | 0.0000        |
| 'Race:'American Indian/Alaskan Native                                              | 0.0164        |
| 'Race:'Asian                                                                       | 0.0328        |
| 'Race:'Black                                                                       | 0.1311        |
| 'Race:'Native Hawaiian/Pacific Isle                                                | 0.0000        |
| 'Race:'Other                                                                       | 0.0656        |
| 'Race:'Unknown                                                                     | 0.2459        |
| 'Does the patient have a history of cancer?'1                                      | 0.1311        |
| 'Please specify: (choice=Hypertension)'1                                           | 0.5738        |
| 'Please specify: (choice=Coronary Artery Disease)'1                                | 0.1311        |
| 'Please specify: (choice=Congestive Heart Failure)'1                               | 0.0164        |
| 'Please specify: (choice=Asthma)'1                                                 | 0.0328        |
| 'Please specify: (choice=Chronic Obstructive Pulmonary Disease)'1                  | 0.0492        |
| 'Please specify: (choice=Chronic Renal Insufficiency)'1                            | 0.0492        |
| 'Please specify: (choice=Cirrhosis)'1                                              | 0.0164        |
| 'Did the patient receive hemodialysis during this admission?'1                     | 0.2459        |
| 'Was the patient placed in a prone position during their admission?'1              | 0.3770        |
| 'COVID- Was hydroxychloroquine (Plaquenil) given during the patient's admission?'1 | 0.4590        |
| 'Age at Admission'                                                                 | 67.8689       |
| Per_Capita                                                                         | 48489.4098    |
| 'SIRS RR'                                                                          | 0.8033        |
| SIRS_WBC                                                                           | 0.2951        |
| SIRS...110                                                                         | 2.0164        |
| 'Creatinine (if 0 = N/A)'                                                          | 1.0705        |
| Ferritin                                                                           | 738.1639      |
| CRP                                                                                | 177.8328      |
| 'D-Domer'                                                                          | 7594.3115     |
| 'Admission Date:'                                                                  | 18369.5902    |
| 'Please specify: (choice=Diabetes)'1                                               | 0.3770        |

|                                                                                       |               |
|---------------------------------------------------------------------------------------|---------------|
| ## 'SIRS TEMP'                                                                        | 0.2295        |
| ## 'Please specify: (choice=Chronic- Hepatitis C)'1                                   | 0.0164        |
| ##                                                                                    | Means Control |
| ## distance                                                                           | 0.1365        |
| ## 'Insurance Class'COMM                                                              | 0.2772        |
| ## 'Insurance Class'MEDICAID                                                          | 0.2285        |
| ## 'Insurance Class'MEDICARE                                                          | 0.4794        |
| ## 'Insurance Class'OTHER                                                             | 0.0000        |
| ## 'Insurance Class'SP                                                                | 0.0150        |
| ## 'Race:'American Indian/Alaskan Native                                              | 0.0037        |
| ## 'Race:'Asian                                                                       | 0.0112        |
| ## 'Race:'Black                                                                       | 0.2060        |
| ## 'Race:'Native Hawaiian/Pacific Isle                                                | 0.0000        |
| ## 'Race:'Other                                                                       | 0.0562        |
| ## 'Race:'Unknown                                                                     | 0.1648        |
| ## 'Does the patient have a history of cancer?'1                                      | 0.1536        |
| ## 'Please specify: (choice=Hypertension)'1                                           | 0.5506        |
| ## 'Please specify: (choice=Coronary Artery Disease)'1                                | 0.1086        |
| ## 'Please specify: (choice=Congestive Heart Failure)'1                               | 0.0262        |
| ## 'Please specify: (choice=Asthma)'1                                                 | 0.0861        |
| ## 'Please specify: (choice=Chronic Obstructive Pulmonary Disease)'1                  | 0.0562        |
| ## 'Please specify: (choice=Chronic Renal Insufficiency)'1                            | 0.0637        |
| ## 'Please specify: (choice=Cirrhosis)'1                                              | 0.0037        |
| ## 'Did the patient receive hemodialysis during this admission?'1                     | 0.0337        |
| ## 'Was the patient placed in a prone position during their admission?'1              | 0.2060        |
| ## 'COVID- Was hydroxychloroquine (Plaquenil) given during the patient's admission?'1 | 0.4082        |
| ## 'Age at Admission'                                                                 | 65.3258       |
| ## Per_Capita                                                                         | 49635.9551    |
| ## 'SIRS RR'                                                                          | 0.7378        |
| ## SIRS_WBC                                                                           | 0.2060        |
| ## SIRS...110                                                                         | 1.8052        |
| ## 'Creatinine (if 0 = N/A)'                                                          | 1.1524        |
| ## Ferritin                                                                           | 1059.6730     |
| ## CRP                                                                                | 123.6281      |
| ## 'D-Domer'                                                                          | 5144.9513     |
| ## 'Admission Date:'                                                                  | 18365.1199    |
| ## 'Please specify: (choice=Diabetes)'1                                               | 0.3333        |
| ## 'SIRS TEMP'                                                                        | 0.2472        |
| ## 'Please specify: (choice=Chronic- Hepatitis C)'1                                   | 0.0037        |
| ##                                                                                    | SD Control    |
| ## distance                                                                           | 0.1369        |
| ## 'Insurance Class'COMM                                                              | 0.4484        |
| ## 'Insurance Class'MEDICAID                                                          | 0.4206        |
| ## 'Insurance Class'MEDICARE                                                          | 0.5005        |
| ## 'Insurance Class'OTHER                                                             | 0.0000        |
| ## 'Insurance Class'SP                                                                | 0.1217        |
| ## 'Race:'American Indian/Alaskan Native                                              | 0.0612        |
| ## 'Race:'Asian                                                                       | 0.1056        |
| ## 'Race:'Black                                                                       | 0.4052        |
| ## 'Race:'Native Hawaiian/Pacific Isle                                                | 0.0000        |
| ## 'Race:'Other                                                                       | 0.2307        |
| ## 'Race:'Unknown                                                                     | 0.3717        |
| ## 'Does the patient have a history of cancer?'1                                      | 0.3612        |
| ## 'Please specify: (choice=Hypertension)'1                                           | 0.4984        |

|                                                                                       |            |
|---------------------------------------------------------------------------------------|------------|
| ## 'Please specify: (choice=Coronary Artery Disease)'1                                | 0.3117     |
| ## 'Please specify: (choice=Congestive Heart Failure)'1                               | 0.1601     |
| ## 'Please specify: (choice=Asthma)'1                                                 | 0.2811     |
| ## 'Please specify: (choice=Chronic Obstructive Pulmonary Disease)'1                  | 0.2307     |
| ## 'Please specify: (choice=Chronic Renal Insufficiency)'1                            | 0.2446     |
| ## 'Please specify: (choice=Cirrhosis)'1                                              | 0.0612     |
| ## 'Did the patient receive hemodialysis during this admission?'1                     | 0.1808     |
| ## 'Was the patient placed in a prone position during their admission?'1              | 0.4052     |
| ## 'COVID- Was hydroxychloroquine (Plaquenil) given during the patient's admission?'1 | 0.4924     |
| ## 'Age at Admission'                                                                 | 16.9471    |
| ## Per_Capita                                                                         | 20831.6095 |
| ## 'SIRS RR'                                                                          | 0.4406     |
| ## SIRS_WBC                                                                           | 0.4052     |
| ## SIRS...110                                                                         | 0.9960     |
| ## 'Creatinine (if 0 = N/A)'                                                          | 1.0342     |
| ## Ferritin                                                                           | 6687.5194  |
| ## CRP                                                                                | 88.4459    |
| ## 'D-Domer'                                                                          | 14157.8212 |
| ## 'Admission Date:'                                                                  | 14.1730    |
| ## 'Please specify: (choice=Diabetes)'1                                               | 0.4723     |
| ## 'SIRS TEMP'                                                                        | 0.4322     |
| ## 'Please specify: (choice=Chronic- Hepatitis C)'1                                   | 0.0612     |
| ##                                                                                    | Mean Diff  |
| ## distance                                                                           | 0.2660     |
| ## 'Insurance Class'COMM                                                              | 0.0015     |
| ## 'Insurance Class'MEDICAID                                                          | -0.0153    |
| ## 'Insurance Class'MEDICARE                                                          | 0.0288     |
| ## 'Insurance Class'OTHER                                                             | 0.0000     |
| ## 'Insurance Class'SP                                                                | -0.0150    |
| ## 'Race:'American Indian/Alaskan Native                                              | 0.0126     |
| ## 'Race:'Asian                                                                       | 0.0216     |
| ## 'Race:'Black                                                                       | -0.0748    |
| ## 'Race:'Native Hawaiian/Pacific Isle                                                | 0.0000     |
| ## 'Race:'Other                                                                       | 0.0094     |
| ## 'Race:'Unknown                                                                     | 0.0811     |
| ## 'Does the patient have a history of cancer?'1                                      | -0.0224    |
| ## 'Please specify: (choice=Hypertension)'1                                           | 0.0232     |
| ## 'Please specify: (choice=Coronary Artery Disease)'1                                | 0.0225     |
| ## 'Please specify: (choice=Congestive Heart Failure)'1                               | -0.0098    |
| ## 'Please specify: (choice=Asthma)'1                                                 | -0.0534    |
| ## 'Please specify: (choice=Chronic Obstructive Pulmonary Disease)'1                  | -0.0070    |
| ## 'Please specify: (choice=Chronic Renal Insufficiency)'1                            | -0.0145    |
| ## 'Please specify: (choice=Cirrhosis)'1                                              | 0.0126     |
| ## 'Did the patient receive hemodialysis during this admission?'1                     | 0.2122     |
| ## 'Was the patient placed in a prone position during their admission?'1              | 0.1711     |
| ## 'COVID- Was hydroxychloroquine (Plaquenil) given during the patient's admission?'1 | 0.0508     |
| ## 'Age at Admission'                                                                 | 2.5430     |
| ## Per_Capita                                                                         | -1146.5452 |
| ## 'SIRS RR'                                                                          | 0.0655     |
| ## SIRS_WBC                                                                           | 0.0891     |
| ## SIRS...110                                                                         | 0.2111     |
| ## 'Creatinine (if 0 = N/A)'                                                          | -0.0819    |
| ## Ferritin                                                                           | -321.5091  |
| ## CRP                                                                                | 54.2047    |

|                                                                                       |           |
|---------------------------------------------------------------------------------------|-----------|
| ## 'D-Domer'                                                                          | 2449.3602 |
| ## 'Admission Date:'                                                                  | 4.4703    |
| ## 'Please specify: (choice=Diabetes)'1                                               | 0.0437    |
| ## 'SIRS TEMP'                                                                        | -0.0177   |
| ## 'Please specify: (choice=Chronic- Hepatitis C)'1                                   | 0.0126    |
| ##                                                                                    | eQQ Med   |
| ## distance                                                                           | 0.2413    |
| ## 'Insurance Class'COMM                                                              | 0.0000    |
| ## 'Insurance Class'MEDICAID                                                          | 0.0000    |
| ## 'Insurance Class'MEDICARE                                                          | 0.0000    |
| ## 'Insurance Class'OTHER                                                             | 0.0000    |
| ## 'Insurance Class'SP                                                                | 0.0000    |
| ## 'Race:'American Indian/Alaskan Native                                              | 0.0000    |
| ## 'Race:'Asian                                                                       | 0.0000    |
| ## 'Race:'Black                                                                       | 0.0000    |
| ## 'Race:'Native Hawaiian/Pacific Isle                                                | 0.0000    |
| ## 'Race:'Other                                                                       | 0.0000    |
| ## 'Race:'Unknown                                                                     | 0.0000    |
| ## 'Does the patient have a history of cancer?'1                                      | 0.0000    |
| ## 'Please specify: (choice=Hypertension)'1                                           | 0.0000    |
| ## 'Please specify: (choice=Coronary Artery Disease)'1                                | 0.0000    |
| ## 'Please specify: (choice=Congestive Heart Failure)'1                               | 0.0000    |
| ## 'Please specify: (choice=Asthma)'1                                                 | 0.0000    |
| ## 'Please specify: (choice=Chronic Obstructive Pulmonary Disease)'1                  | 0.0000    |
| ## 'Please specify: (choice=Chronic Renal Insufficiency)'1                            | 0.0000    |
| ## 'Please specify: (choice=Cirrhosis)'1                                              | 0.0000    |
| ## 'Did the patient receive hemodialysis during this admission?'1                     | 0.0000    |
| ## 'Was the patient placed in a prone position during their admission?'1              | 0.0000    |
| ## 'COVID- Was hydroxychloroquine (Plaquenil) given during the patient's admission?'1 | 0.0000    |
| ## 'Age at Admission'                                                                 | 2.0000    |
| ## Per_Capita                                                                         | 565.0000  |
| ## 'SIRS RR'                                                                          | 0.0000    |
| ## SIRS_WBC                                                                           | 0.0000    |
| ## SIRS...110                                                                         | 0.0000    |
| ## 'Creatinine (if 0 = N/A)'                                                          | 0.1000    |
| ## Ferritin                                                                           | 80.0000   |
| ## CRP                                                                                | 60.3000   |
| ## 'D-Domer'                                                                          | 200.0000  |
| ## 'Admission Date:'                                                                  | 5.0000    |
| ## 'Please specify: (choice=Diabetes)'1                                               | 0.0000    |
| ## 'SIRS TEMP'                                                                        | 0.0000    |
| ## 'Please specify: (choice=Chronic- Hepatitis C)'1                                   | 0.0000    |
| ##                                                                                    | eQQ Mean  |
| ## distance                                                                           | 0.2630    |
| ## 'Insurance Class'COMM                                                              | 0.0000    |
| ## 'Insurance Class'MEDICAID                                                          | 0.0164    |
| ## 'Insurance Class'MEDICARE                                                          | 0.0328    |
| ## 'Insurance Class'OTHER                                                             | 0.0000    |
| ## 'Insurance Class'SP                                                                | 0.0164    |
| ## 'Race:'American Indian/Alaskan Native                                              | 0.0000    |
| ## 'Race:'Asian                                                                       | 0.0164    |
| ## 'Race:'Black                                                                       | 0.0820    |
| ## 'Race:'Native Hawaiian/Pacific Isle                                                | 0.0000    |
| ## 'Race:'Other                                                                       | 0.0000    |

|                                                                                       |            |
|---------------------------------------------------------------------------------------|------------|
| ## 'Race:'Unknown                                                                     | 0.0820     |
| ## 'Does the patient have a history of cancer?'1                                      | 0.0328     |
| ## 'Please specify: (choice=Hypertension)'1                                           | 0.0328     |
| ## 'Please specify: (choice=Coronary Artery Disease)'1                                | 0.0164     |
| ## 'Please specify: (choice=Congestive Heart Failure)'1                               | 0.0164     |
| ## 'Please specify: (choice=Asthma)'1                                                 | 0.0492     |
| ## 'Please specify: (choice=Chronic Obstructive Pulmonary Disease)'1                  | 0.0164     |
| ## 'Please specify: (choice=Chronic Renal Insufficiency)'1                            | 0.0164     |
| ## 'Please specify: (choice=Cirrhosis)'1                                              | 0.0000     |
| ## 'Did the patient receive hemodialysis during this admission?'1                     | 0.2131     |
| ## 'Was the patient placed in a prone position during their admission?'1              | 0.1639     |
| ## 'COVID- Was hydroxychloroquine (Plaquenil) given during the patient's admission?'1 | 0.0492     |
| ## 'Age at Admission'                                                                 | 3.7377     |
| ## Per_Capita                                                                         | 1808.8689  |
| ## 'SIRS RR'                                                                          | 0.0656     |
| ## SIRS_WBC                                                                           | 0.0820     |
| ## SIRS...110                                                                         | 0.2787     |
| ## 'Creatinine (if 0 = N/A)'                                                          | 0.2180     |
| ## Ferritin                                                                           | 1852.6508  |
| ## CRP                                                                                | 54.2541    |
| ## 'D-Domer'                                                                          | 2358.0000  |
| ## 'Admission Date:'                                                                  | 5.1475     |
| ## 'Please specify: (choice=Diabetes)'1                                               | 0.0492     |
| ## 'SIRS TEMP'                                                                        | 0.0164     |
| ## 'Please specify: (choice=Chronic- Hepatitis C)'1                                   | 0.0000     |
| ##                                                                                    | eQQ Max    |
| ## distance                                                                           | 0.4895     |
| ## 'Insurance Class'COMM                                                              | 0.0000     |
| ## 'Insurance Class'MEDICAID                                                          | 1.0000     |
| ## 'Insurance Class'MEDICARE                                                          | 1.0000     |
| ## 'Insurance Class'OTHER                                                             | 0.0000     |
| ## 'Insurance Class'SP                                                                | 1.0000     |
| ## 'Race:'American Indian/Alaskan Native                                              | 0.0000     |
| ## 'Race:'Asian                                                                       | 1.0000     |
| ## 'Race:'Black                                                                       | 1.0000     |
| ## 'Race:'Native Hawaiian/Pacific Isle                                                | 0.0000     |
| ## 'Race:'Other                                                                       | 0.0000     |
| ## 'Race:'Unknown                                                                     | 1.0000     |
| ## 'Does the patient have a history of cancer?'1                                      | 1.0000     |
| ## 'Please specify: (choice=Hypertension)'1                                           | 1.0000     |
| ## 'Please specify: (choice=Coronary Artery Disease)'1                                | 1.0000     |
| ## 'Please specify: (choice=Congestive Heart Failure)'1                               | 1.0000     |
| ## 'Please specify: (choice=Asthma)'1                                                 | 1.0000     |
| ## 'Please specify: (choice=Chronic Obstructive Pulmonary Disease)'1                  | 1.0000     |
| ## 'Please specify: (choice=Chronic Renal Insufficiency)'1                            | 1.0000     |
| ## 'Please specify: (choice=Cirrhosis)'1                                              | 0.0000     |
| ## 'Did the patient receive hemodialysis during this admission?'1                     | 1.0000     |
| ## 'Was the patient placed in a prone position during their admission?'1              | 1.0000     |
| ## 'COVID- Was hydroxychloroquine (Plaquenil) given during the patient's admission?'1 | 1.0000     |
| ## 'Age at Admission'                                                                 | 18.0000    |
| ## Per_Capita                                                                         | 15315.0000 |
| ## 'SIRS RR'                                                                          | 1.0000     |
| ## SIRS_WBC                                                                           | 1.0000     |
| ## SIRS...110                                                                         | 1.0000     |

|                                                                                      |               |
|--------------------------------------------------------------------------------------|---------------|
| ## 'Creatinine (if 0 = N/A)'                                                         | 2.4000        |
| ## Ferritin                                                                          | 107819.7000   |
| ## CRP                                                                               | 78.4000       |
| ## 'D-Domer'                                                                         | 42709.0000    |
| ## 'Admission Date:'                                                                 | 18.0000       |
| ## 'Please specify: (choice=Diabetes)'                                               | 1.0000        |
| ## 'SIRS TEMP'                                                                       | 1.0000        |
| ## 'Please specify: (choice=Chronic- Hepatitis C)'                                   | 0.0000        |
| ##                                                                                   |               |
| ##                                                                                   |               |
| ## Summary of balance for matched data:                                              |               |
| ##                                                                                   | Means Treated |
| ## distance                                                                          | 0.4025        |
| ## 'Insurance Class'COMM                                                             | 0.2787        |
| ## 'Insurance Class'MEDICAID                                                         | 0.2131        |
| ## 'Insurance Class'MEDICARE                                                         | 0.5082        |
| ## 'Insurance Class'OTHER                                                            | 0.0000        |
| ## 'Insurance Class'SP                                                               | 0.0000        |
| ## 'Race:'American Indian/Alaskan Native                                             | 0.0164        |
| ## 'Race:'Asian                                                                      | 0.0328        |
| ## 'Race:'Black                                                                      | 0.1311        |
| ## 'Race:'Native Hawaiian/Pacific Isle                                               | 0.0000        |
| ## 'Race:'Other                                                                      | 0.0656        |
| ## 'Race:'Unknown                                                                    | 0.2459        |
| ## 'Does the patient have a history of cancer?'                                      | 0.1311        |
| ## 'Please specify: (choice=Hypertension)'                                           | 0.5738        |
| ## 'Please specify: (choice=Coronary Artery Disease)'                                | 0.1311        |
| ## 'Please specify: (choice=Congestive Heart Failure)'                               | 0.0164        |
| ## 'Please specify: (choice=Asthma)'                                                 | 0.0328        |
| ## 'Please specify: (choice=Chronic Obstructive Pulmonary Disease)'                  | 0.0492        |
| ## 'Please specify: (choice=Chronic Renal Insufficiency)'                            | 0.0492        |
| ## 'Please specify: (choice=Cirrhosis)'                                              | 0.0164        |
| ## 'Did the patient receive hemodialysis during this admission?'                     | 0.2459        |
| ## 'Was the patient placed in a prone position during their admission?'              | 0.3770        |
| ## 'COVID- Was hydroxychloroquine (Plaquenil) given during the patient's admission?' | 0.4590        |
| ## 'Age at Admission'                                                                | 67.8689       |
| ## Per_Capita                                                                        | 48489.4098    |
| ## 'SIRS RR'                                                                         | 0.8033        |
| ## SIRS_WBC                                                                          | 0.2951        |
| ## SIRS...110                                                                        | 2.0164        |
| ## 'Creatinine (if 0 = N/A)'                                                         | 1.0705        |
| ## Ferritin                                                                          | 738.1639      |
| ## CRP                                                                               | 177.8328      |
| ## 'D-Domer'                                                                         | 7594.3115     |
| ## 'Admission Date:'                                                                 | 18369.5902    |
| ## 'Please specify: (choice=Diabetes)'                                               | 0.3770        |
| ## 'SIRS TEMP'                                                                       | 0.2295        |
| ## 'Please specify: (choice=Chronic- Hepatitis C)'                                   | 0.0164        |
| ##                                                                                   | Means Control |
| ## distance                                                                          | 0.3018        |
| ## 'Insurance Class'COMM                                                             | 0.2951        |
| ## 'Insurance Class'MEDICAID                                                         | 0.1639        |
| ## 'Insurance Class'MEDICARE                                                         | 0.5410        |
| ## 'Insurance Class'OTHER                                                            | 0.0000        |

|                                                                                       |            |
|---------------------------------------------------------------------------------------|------------|
| ## 'Insurance Class'SP                                                                | 0.0000     |
| ## 'Race:'American Indian/Alaskan Native                                              | 0.0164     |
| ## 'Race:'Asian                                                                       | 0.0164     |
| ## 'Race:'Black                                                                       | 0.1967     |
| ## 'Race:'Native Hawaiian/Pacific Isle                                                | 0.0000     |
| ## 'Race:'Other                                                                       | 0.0492     |
| ## 'Race:'Unknown                                                                     | 0.1967     |
| ## 'Does the patient have a history of cancer?'1                                      | 0.1475     |
| ## 'Please specify: (choice=Hypertension)'1                                           | 0.6393     |
| ## 'Please specify: (choice=Coronary Artery Disease)'1                                | 0.0820     |
| ## 'Please specify: (choice=Congestive Heart Failure)'1                               | 0.0164     |
| ## 'Please specify: (choice=Asthma)'1                                                 | 0.0164     |
| ## 'Please specify: (choice=Chronic Obstructive Pulmonary Disease)'1                  | 0.0492     |
| ## 'Please specify: (choice=Chronic Renal Insufficiency)'1                            | 0.0492     |
| ## 'Please specify: (choice=Cirrhosis)'1                                              | 0.0164     |
| ## 'Did the patient receive hemodialysis during this admission?'1                     | 0.1148     |
| ## 'Was the patient placed in a prone position during their admission?'1              | 0.3279     |
| ## 'COVID- Was hydroxychloroquine (Plaquenil) given during the patient's admission?'1 | 0.3770     |
| ## 'Age at Admission'                                                                 | 69.3607    |
| ## Per_Capita                                                                         | 47583.1639 |
| ## 'SIRS RR'                                                                          | 0.7213     |
| ## SIRS_WBC                                                                           | 0.3115     |
| ## SIRS...110                                                                         | 1.9836     |
| ## 'Creatinine (if 0 = N/A)'                                                          | 1.2721     |
| ## Ferritin                                                                           | 747.9836   |
| ## CRP                                                                                | 183.1787   |
| ## 'D-Domer'                                                                          | 8645.6230  |
| ## 'Admission Date:'                                                                  | 18370.5574 |
| ## 'Please specify: (choice=Diabetes)'1                                               | 0.3770     |
| ## 'SIRS TEMP'                                                                        | 0.2295     |
| ## 'Please specify: (choice=Chronic- Hepatitis C)'1                                   | 0.0164     |
| ##                                                                                    | SD Control |
| ## distance                                                                           | 0.1901     |
| ## 'Insurance Class'COMM                                                              | 0.4599     |
| ## 'Insurance Class'MEDICAID                                                          | 0.3733     |
| ## 'Insurance Class'MEDICARE                                                          | 0.5025     |
| ## 'Insurance Class'OTHER                                                             | 0.0000     |
| ## 'Insurance Class'SP                                                                | 0.0000     |
| ## 'Race:'American Indian/Alaskan Native                                              | 0.1280     |
| ## 'Race:'Asian                                                                       | 0.1280     |
| ## 'Race:'Black                                                                       | 0.4008     |
| ## 'Race:'Native Hawaiian/Pacific Isle                                                | 0.0000     |
| ## 'Race:'Other                                                                       | 0.2180     |
| ## 'Race:'Unknown                                                                     | 0.4008     |
| ## 'Does the patient have a history of cancer?'1                                      | 0.3576     |
| ## 'Please specify: (choice=Hypertension)'1                                           | 0.4842     |
| ## 'Please specify: (choice=Coronary Artery Disease)'1                                | 0.2766     |
| ## 'Please specify: (choice=Congestive Heart Failure)'1                               | 0.1280     |
| ## 'Please specify: (choice=Asthma)'1                                                 | 0.1280     |
| ## 'Please specify: (choice=Chronic Obstructive Pulmonary Disease)'1                  | 0.2180     |
| ## 'Please specify: (choice=Chronic Renal Insufficiency)'1                            | 0.2180     |
| ## 'Please specify: (choice=Cirrhosis)'1                                              | 0.1280     |
| ## 'Did the patient receive hemodialysis during this admission?'1                     | 0.3214     |
| ## 'Was the patient placed in a prone position during their admission?'1              | 0.4733     |

|                                                                                       |            |
|---------------------------------------------------------------------------------------|------------|
| ## 'COVID- Was hydroxychloroquine (Plaquenil) given during the patient's admission?'1 | 0.4887     |
| ## 'Age at Admission'                                                                 | 15.2447    |
| ## Per_Capita                                                                         | 17737.2901 |
| ## 'SIRS RR'                                                                          | 0.4521     |
| ## SIRS_WBC                                                                           | 0.4669     |
| ## SIRS...110                                                                         | 0.9218     |
| ## 'Creatinine (if 0 = N/A)'                                                          | 1.3560     |
| ## Ferritin                                                                           | 523.5259   |
| ## CRP                                                                                | 108.1718   |
| ## 'D-Domer'                                                                          | 21417.6319 |
| ## 'Admission Date:'                                                                  | 16.7666    |
| ## 'Please specify: (choice=Diabetes)'1                                               | 0.4887     |
| ## 'SIRS TEMP'                                                                        | 0.4240     |
| ## 'Please specify: (choice=Chronic- Hepatitis C)'1                                   | 0.1280     |
| ##                                                                                    | Mean Diff  |
| ## distance                                                                           | 0.1007     |
| ## 'Insurance Class'COMM                                                              | -0.0164    |
| ## 'Insurance Class'MEDICAID                                                          | 0.0492     |
| ## 'Insurance Class'MEDICARE                                                          | -0.0328    |
| ## 'Insurance Class'OTHER                                                             | 0.0000     |
| ## 'Insurance Class'SP                                                                | 0.0000     |
| ## 'Race:'American Indian/Alaskan Native                                              | 0.0000     |
| ## 'Race:'Asian                                                                       | 0.0164     |
| ## 'Race:'Black                                                                       | -0.0656    |
| ## 'Race:'Native Hawaiian/Pacific Isle                                                | 0.0000     |
| ## 'Race:'Other                                                                       | 0.0164     |
| ## 'Race:'Unknown                                                                     | 0.0492     |
| ## 'Does the patient have a history of cancer?'1                                      | -0.0164    |
| ## 'Please specify: (choice=Hypertension)'1                                           | -0.0656    |
| ## 'Please specify: (choice=Coronary Artery Disease)'1                                | 0.0492     |
| ## 'Please specify: (choice=Congestive Heart Failure)'1                               | 0.0000     |
| ## 'Please specify: (choice=Asthma)'1                                                 | 0.0164     |
| ## 'Please specify: (choice=Chronic Obstructive Pulmonary Disease)'1                  | 0.0000     |
| ## 'Please specify: (choice=Chronic Renal Insufficiency)'1                            | 0.0000     |
| ## 'Please specify: (choice=Cirrhosis)'1                                              | 0.0000     |
| ## 'Did the patient receive hemodialysis during this admission?'1                     | 0.1311     |
| ## 'Was the patient placed in a prone position during their admission?'1              | 0.0492     |
| ## 'COVID- Was hydroxychloroquine (Plaquenil) given during the patient's admission?'1 | 0.0820     |
| ## 'Age at Admission'                                                                 | -1.4918    |
| ## Per_Capita                                                                         | 906.2459   |
| ## 'SIRS RR'                                                                          | 0.0820     |
| ## SIRS_WBC                                                                           | -0.0164    |
| ## SIRS...110                                                                         | 0.0328     |
| ## 'Creatinine (if 0 = N/A)'                                                          | -0.2016    |
| ## Ferritin                                                                           | -9.8197    |
| ## CRP                                                                                | -5.3459    |
| ## 'D-Domer'                                                                          | -1051.3115 |
| ## 'Admission Date:'                                                                  | -0.9672    |
| ## 'Please specify: (choice=Diabetes)'1                                               | 0.0000     |
| ## 'SIRS TEMP'                                                                        | 0.0000     |
| ## 'Please specify: (choice=Chronic- Hepatitis C)'1                                   | 0.0000     |
| ##                                                                                    | eQQ Med    |
| ## distance                                                                           | 0.0474     |
| ## 'Insurance Class'COMM                                                              | 0.0000     |



|                                                                                       |          |
|---------------------------------------------------------------------------------------|----------|
| ## 'Insurance Class'MEDICAID                                                          | 0.0000   |
| ## 'Insurance Class'MEDICARE                                                          | 0.0000   |
| ## 'Insurance Class'OTHER                                                             | 0.0000   |
| ## 'Insurance Class'SP                                                                | 0.0000   |
| ## 'Race:'American Indian/Alaskan Native                                              | 0.0000   |
| ## 'Race:'Asian                                                                       | 0.0000   |
| ## 'Race:'Black                                                                       | 0.0000   |
| ## 'Race:'Native Hawaiian/Pacific Isle                                                | 0.0000   |
| ## 'Race:'Other                                                                       | 0.0000   |
| ## 'Race:'Unknown                                                                     | 0.0000   |
| ## 'Does the patient have a history of cancer?'1                                      | 0.0000   |
| ## 'Please specify: (choice=Hypertension)'1                                           | 0.0000   |
| ## 'Please specify: (choice=Coronary Artery Disease)'1                                | 0.0000   |
| ## 'Please specify: (choice=Congestive Heart Failure)'1                               | 0.0000   |
| ## 'Please specify: (choice=Asthma)'1                                                 | 0.0000   |
| ## 'Please specify: (choice=Chronic Obstructive Pulmonary Disease)'1                  | 0.0000   |
| ## 'Please specify: (choice=Chronic Renal Insufficiency)'1                            | 0.0000   |
| ## 'Please specify: (choice=Cirrhosis)'1                                              | 0.0000   |
| ## 'Did the patient receive hemodialysis during this admission?'1                     | 0.0000   |
| ## 'Was the patient placed in a prone position during their admission?'1              | 0.0000   |
| ## 'COVID- Was hydroxychloroquine (Plaquenil) given during the patient's admission?'1 | 0.0000   |
| ## 'Age at Admission'                                                                 | 2.0000   |
| ## Per_Capita                                                                         | 835.0000 |
| ## 'SIRS RR'                                                                          | 0.0000   |
| ## SIRS_WBC                                                                           | 0.0000   |
| ## SIRS...110                                                                         | 0.0000   |
| ## 'Creatinine (if 0 = N/A)'                                                          | 0.1000   |
| ## Ferritin                                                                           | 40.0000  |
| ## CRP                                                                                | 13.3000  |
| ## 'D-Domer'                                                                          | 346.0000 |
| ## 'Admission Date:'                                                                  | 3.0000   |
| ## 'Please specify: (choice=Diabetes)'1                                               | 0.0000   |
| ## 'SIRS TEMP'                                                                        | 0.0000   |
| ## 'Please specify: (choice=Chronic- Hepatitis C)'1                                   | 0.0000   |
| ##                                                                                    | eQQ Mean |
| ## distance                                                                           | 0.1009   |
| ## 'Insurance Class'COMM                                                              | 0.0164   |
| ## 'Insurance Class'MEDICAID                                                          | 0.0492   |
| ## 'Insurance Class'MEDICARE                                                          | 0.0328   |
| ## 'Insurance Class'OTHER                                                             | 0.0000   |
| ## 'Insurance Class'SP                                                                | 0.0000   |
| ## 'Race:'American Indian/Alaskan Native                                              | 0.0000   |
| ## 'Race:'Asian                                                                       | 0.0164   |
| ## 'Race:'Black                                                                       | 0.0656   |
| ## 'Race:'Native Hawaiian/Pacific Isle                                                | 0.0000   |
| ## 'Race:'Other                                                                       | 0.0164   |
| ## 'Race:'Unknown                                                                     | 0.0492   |
| ## 'Does the patient have a history of cancer?'1                                      | 0.0164   |
| ## 'Please specify: (choice=Hypertension)'1                                           | 0.0656   |
| ## 'Please specify: (choice=Coronary Artery Disease)'1                                | 0.0492   |
| ## 'Please specify: (choice=Congestive Heart Failure)'1                               | 0.0000   |
| ## 'Please specify: (choice=Asthma)'1                                                 | 0.0164   |
| ## 'Please specify: (choice=Chronic Obstructive Pulmonary Disease)'1                  | 0.0000   |
| ## 'Please specify: (choice=Chronic Renal Insufficiency)'1                            | 0.0000   |

|                                                                                       |            |
|---------------------------------------------------------------------------------------|------------|
| ## 'Please specify: (choice=Cirrhosis)'1                                              | 0.0000     |
| ## 'Did the patient receive hemodialysis during this admission?'1                     | 0.1311     |
| ## 'Was the patient placed in a prone position during their admission?'1              | 0.0492     |
| ## 'COVID- Was hydroxychloroquine (Plaquenil) given during the patient's admission?'1 | 0.0820     |
| ## 'Age at Admission'                                                                 | 2.1148     |
| ## Per_Capita                                                                         | 2838.5082  |
| ## 'SIRS RR'                                                                          | 0.0820     |
| ## SIRS_WBC                                                                           | 0.0164     |
| ## SIRS...110                                                                         | 0.2295     |
| ## 'Creatinine (if 0 = N/A)'                                                          | 0.3000     |
| ## Ferritin                                                                           | 64.2131    |
| ## CRP                                                                                | 15.2705    |
| ## 'D-Domer'                                                                          | 1704.0000  |
| ## 'Admission Date:'                                                                  | 3.6557     |
| ## 'Please specify: (choice=Diabetes)'1                                               | 0.0000     |
| ## 'SIRS TEMP'                                                                        | 0.0000     |
| ## 'Please specify: (choice=Chronic- Hepatitis C)'1                                   | 0.0000     |
| ##                                                                                    | eQQ Max    |
| ## distance                                                                           | 0.3183     |
| ## 'Insurance Class'COMM                                                              | 1.0000     |
| ## 'Insurance Class'MEDICAID                                                          | 1.0000     |
| ## 'Insurance Class'MEDICARE                                                          | 1.0000     |
| ## 'Insurance Class'OTHER                                                             | 0.0000     |
| ## 'Insurance Class'SP                                                                | 0.0000     |
| ## 'Race:'American Indian/Alaskan Native                                              | 0.0000     |
| ## 'Race:'Asian                                                                       | 1.0000     |
| ## 'Race:'Black                                                                       | 1.0000     |
| ## 'Race:'Native Hawaiian/Pacific Isle                                                | 0.0000     |
| ## 'Race:'Other                                                                       | 1.0000     |
| ## 'Race:'Unknown                                                                     | 1.0000     |
| ## 'Does the patient have a history of cancer?'1                                      | 1.0000     |
| ## 'Please specify: (choice=Hypertension)'1                                           | 1.0000     |
| ## 'Please specify: (choice=Coronary Artery Disease)'1                                | 1.0000     |
| ## 'Please specify: (choice=Congestive Heart Failure)'1                               | 0.0000     |
| ## 'Please specify: (choice=Asthma)'1                                                 | 1.0000     |
| ## 'Please specify: (choice=Chronic Obstructive Pulmonary Disease)'1                  | 0.0000     |
| ## 'Please specify: (choice=Chronic Renal Insufficiency)'1                            | 0.0000     |
| ## 'Please specify: (choice=Cirrhosis)'1                                              | 0.0000     |
| ## 'Did the patient receive hemodialysis during this admission?'1                     | 1.0000     |
| ## 'Was the patient placed in a prone position during their admission?'1              | 1.0000     |
| ## 'COVID- Was hydroxychloroquine (Plaquenil) given during the patient's admission?'1 | 1.0000     |
| ## 'Age at Admission'                                                                 | 9.0000     |
| ## Per_Capita                                                                         | 30530.0000 |
| ## 'SIRS RR'                                                                          | 1.0000     |
| ## SIRS_WBC                                                                           | 1.0000     |
| ## SIRS...110                                                                         | 1.0000     |
| ## 'Creatinine (if 0 = N/A)'                                                          | 3.0000     |
| ## Ferritin                                                                           | 1138.0000  |
| ## CRP                                                                                | 53.9000    |
| ## 'D-Domer'                                                                          | 17862.0000 |
| ## 'Admission Date:'                                                                  | 18.0000    |
| ## 'Please specify: (choice=Diabetes)'1                                               | 0.0000     |
| ## 'SIRS TEMP'                                                                        | 0.0000     |
| ## 'Please specify: (choice=Chronic- Hepatitis C)'1                                   | 0.0000     |

```

##
## Percent Balance Improvement:
##
## distance 62.1531
## 'Insurance Class'COMM -968.0000
## 'Insurance Class'MEDICAID -220.4000
## 'Insurance Class'MEDICARE -13.8593
## 'Insurance Class'OTHER 0.0000
## 'Insurance Class'SP 100.0000
## 'Race:'American Indian/Alaskan Native 100.0000
## 'Race:'Asian 23.9316
## 'Race:'Black 12.3872
## 'Race:'Native Hawaiian/Pacific Isle 0.0000
## 'Race:'Other -74.5098
## 'Race:'Unknown 39.3641
## 'Does the patient have a history of cancer?'1 26.8493
## 'Please specify: (choice=Hypertension)'1 -182.5397
## 'Please specify: (choice=Coronary Artery Disease)'1 -118.2561
## 'Please specify: (choice=Congestive Heart Failure)'1 100.0000
## 'Please specify: (choice=Asthma)'1 69.2750
## 'Please specify: (choice=Chronic Obstructive Pulmonary Disease)'1 100.0000
## 'Please specify: (choice=Chronic Renal Insufficiency)'1 100.0000
## 'Please specify: (choice=Cirrhosis)'1 100.0000
## 'Did the patient receive hemodialysis during this admission?'1 38.1944
## 'Was the patient placed in a prone position during their admission?'1 71.2491
## 'COVID- Was hydroxychloroquine (Plaquenil) given during the patient's admission?'1 -61.4268
## 'Age at Admission' 41.3371
## Per_Capita 20.9586
## 'SIRS RR' -25.2345
## SIRS_WBC 81.5989
## SIRS...110 84.4722
## 'Creatinine (if 0 = N/A)' -146.0737
## Ferritin 96.9458
## CRP 90.1376
## 'D-Domer' 57.0781
## 'Admission Date:' 78.3636
## 'Please specify: (choice=Diabetes)'1 100.0000
## 'SIRS TEMP' 100.0000
## 'Please specify: (choice=Chronic- Hepatitis C)'1 100.0000
##
## eQQ Med
## distance 80.3361
## 'Insurance Class'COMM 0.0000
## 'Insurance Class'MEDICAID 0.0000
## 'Insurance Class'MEDICARE 0.0000
## 'Insurance Class'OTHER 0.0000
## 'Insurance Class'SP 0.0000
## 'Race:'American Indian/Alaskan Native 0.0000
## 'Race:'Asian 0.0000
## 'Race:'Black 0.0000
## 'Race:'Native Hawaiian/Pacific Isle 0.0000
## 'Race:'Other 0.0000
## 'Race:'Unknown 0.0000
## 'Does the patient have a history of cancer?'1 0.0000
## 'Please specify: (choice=Hypertension)'1 0.0000

```

|                                                                                       |           |
|---------------------------------------------------------------------------------------|-----------|
| ## 'Please specify: (choice=Coronary Artery Disease)'1                                | 0.0000    |
| ## 'Please specify: (choice=Congestive Heart Failure)'1                               | 0.0000    |
| ## 'Please specify: (choice=Asthma)'1                                                 | 0.0000    |
| ## 'Please specify: (choice=Chronic Obstructive Pulmonary Disease)'1                  | 0.0000    |
| ## 'Please specify: (choice=Chronic Renal Insufficiency)'1                            | 0.0000    |
| ## 'Please specify: (choice=Cirrhosis)'1                                              | 0.0000    |
| ## 'Did the patient receive hemodialysis during this admission?'1                     | 0.0000    |
| ## 'Was the patient placed in a prone position during their admission?'1              | 0.0000    |
| ## 'COVID- Was hydroxychloroquine (Plaquenil) given during the patient's admission?'1 | 0.0000    |
| ## 'Age at Admission'                                                                 | 0.0000    |
| ## Per_Capita                                                                         | -47.7876  |
| ## 'SIRS RR'                                                                          | 0.0000    |
| ## SIRS_WBC                                                                           | 0.0000    |
| ## SIRS...110                                                                         | 0.0000    |
| ## 'Creatinine (if 0 = N/A)'                                                          | 0.0000    |
| ## Ferritin                                                                           | 50.0000   |
| ## CRP                                                                                | 77.9436   |
| ## 'D-Domer'                                                                          | -73.0000  |
| ## 'Admission Date:'                                                                  | 40.0000   |
| ## 'Please specify: (choice=Diabetes)'1                                               | 0.0000    |
| ## 'SIRS TEMP'                                                                        | 0.0000    |
| ## 'Please specify: (choice=Chronic- Hepatitis C)'1                                   | 0.0000    |
| ##                                                                                    | eQQ Mean  |
| ## distance                                                                           | 61.6491   |
| ## 'Insurance Class'COMM                                                              | -Inf      |
| ## 'Insurance Class'MEDICAID                                                          | -200.0000 |
| ## 'Insurance Class'MEDICARE                                                          | 0.0000    |
| ## 'Insurance Class'OTHER                                                             | 0.0000    |
| ## 'Insurance Class'SP                                                                | 100.0000  |
| ## 'Race:'American Indian/Alaskan Native                                              | 0.0000    |
| ## 'Race:'Asian                                                                       | 0.0000    |
| ## 'Race:'Black                                                                       | 20.0000   |
| ## 'Race:'Native Hawaiian/Pacific Isle                                                | 0.0000    |
| ## 'Race:'Other                                                                       | -Inf      |
| ## 'Race:'Unknown                                                                     | 40.0000   |
| ## 'Does the patient have a history of cancer?'1                                      | 50.0000   |
| ## 'Please specify: (choice=Hypertension)'1                                           | -100.0000 |
| ## 'Please specify: (choice=Coronary Artery Disease)'1                                | -200.0000 |
| ## 'Please specify: (choice=Congestive Heart Failure)'1                               | 100.0000  |
| ## 'Please specify: (choice=Asthma)'1                                                 | 66.6667   |
| ## 'Please specify: (choice=Chronic Obstructive Pulmonary Disease)'1                  | 100.0000  |
| ## 'Please specify: (choice=Chronic Renal Insufficiency)'1                            | 100.0000  |
| ## 'Please specify: (choice=Cirrhosis)'1                                              | 0.0000    |
| ## 'Did the patient receive hemodialysis during this admission?'1                     | 38.4615   |
| ## 'Was the patient placed in a prone position during their admission?'1              | 70.0000   |
| ## 'COVID- Was hydroxychloroquine (Plaquenil) given during the patient's admission?'1 | -66.6667  |
| ## 'Age at Admission'                                                                 | 43.4211   |
| ## Per_Capita                                                                         | -56.9217  |
| ## 'SIRS RR'                                                                          | -25.0000  |
| ## SIRS_WBC                                                                           | 80.0000   |
| ## SIRS...110                                                                         | 17.6471   |
| ## 'Creatinine (if 0 = N/A)'                                                          | -37.5940  |
| ## Ferritin                                                                           | 96.5340   |
| ## CRP                                                                                | 71.8538   |

```

## 'D-Domer' 27.7354
## 'Admission Date:' 28.9809
## 'Please specify: (choice=Diabetes)'1 100.0000
## 'SIRS TEMP' 100.0000
## 'Please specify: (choice=Chronic- Hepatitis C)'1 0.0000
## eQQ Max
## distance 34.9704
## 'Insurance Class'COMM -Inf
## 'Insurance Class'MEDICAID 0.0000
## 'Insurance Class'MEDICARE 0.0000
## 'Insurance Class'OTHER 0.0000
## 'Insurance Class'SP 100.0000
## 'Race:'American Indian/Alaskan Native 0.0000
## 'Race:'Asian 0.0000
## 'Race:'Black 0.0000
## 'Race:'Native Hawaiian/Pacific Isle 0.0000
## 'Race:'Other -Inf
## 'Race:'Unknown 0.0000
## 'Does the patient have a history of cancer?'1 0.0000
## 'Please specify: (choice=Hypertension)'1 0.0000
## 'Please specify: (choice=Coronary Artery Disease)'1 0.0000
## 'Please specify: (choice=Congestive Heart Failure)'1 100.0000
## 'Please specify: (choice=Asthma)'1 0.0000
## 'Please specify: (choice=Chronic Obstructive Pulmonary Disease)'1 100.0000
## 'Please specify: (choice=Chronic Renal Insufficiency)'1 100.0000
## 'Please specify: (choice=Cirrhosis)'1 0.0000
## 'Did the patient receive hemodialysis during this admission?'1 0.0000
## 'Was the patient placed in a prone position during their admission?'1 0.0000
## 'COVID- Was hydroxychloroquine (Plaquenil) given during the patient's admission?'1 0.0000
## 'Age at Admission' 50.0000
## Per_Capita -99.3470
## 'SIRS RR' 0.0000
## SIRS_WBC 0.0000
## SIRS...110 0.0000
## 'Creatinine (if 0 = N/A)' -25.0000
## Ferritin 98.9445
## CRP 31.2500
## 'D-Domer' 58.1774
## 'Admission Date:' 0.0000
## 'Please specify: (choice=Diabetes)'1 100.0000
## 'SIRS TEMP' 100.0000
## 'Please specify: (choice=Chronic- Hepatitis C)'1 0.0000
##
## Sample sizes:
## Control Treated
## All 267 61
## Matched 61 61
## Unmatched 206 0
## Discarded 0 0

```

```

matched.cohort = get_matches(my.full.match, complete.df, id_cols = NULL, newdata = NULL) # sample size

```

```

# is there any differene between the groups
binary.variables = matched.cohort %>%

```

```

dplyr::select(Was.plasma.given.to.the.patient.during.this.admission., Does.the.patient.have.a.history)
)

chi.p.exit = vector()
chi.variable.name = vector()

for ( i in c(2:8, 9, 10:16)) {
  variable.1 = binary.variables[[i]][binary.variables$Was.plasma.given.to.the.patient.during.this.admission]
  variable.0 = binary.variables[[i]][binary.variables$Was.plasma.given.to.the.patient.during.this.admission]
  chisquare.test = chisq.test(variable.1, variable.0)
  chisquare.test.p.value = chisquare.test$p.value
  chi.p.exit[i] = chisquare.test.p.value
  chi.variable.name[i] = colnames(binary.variables)[i]
}

```

```

## Warning in chisq.test(variable.1, variable.0): Chi-squared approximation may be
## incorrect

```

```

## Warning in chisq.test(variable.1, variable.0): Chi-squared approximation may be
## incorrect

```

```

## Warning in chisq.test(variable.1, variable.0): Chi-squared approximation may be
## incorrect

```

```

## Warning in chisq.test(variable.1, variable.0): Chi-squared approximation may be
## incorrect

```

```

## Warning in chisq.test(variable.1, variable.0): Chi-squared approximation may be
## incorrect

```

```

## Warning in chisq.test(variable.1, variable.0): Chi-squared approximation may be
## incorrect

```

```

## Warning in chisq.test(variable.1, variable.0): Chi-squared approximation may be
## incorrect

```

```

## Warning in chisq.test(variable.1, variable.0): Chi-squared approximation may be
## incorrect

```

```

## Warning in chisq.test(variable.1, variable.0): Chi-squared approximation may be
## incorrect

```

```

## Warning in chisq.test(variable.1, variable.0): Chi-squared approximation may be
## incorrect

```

```

## Warning in chisq.test(variable.1, variable.0): Chi-squared approximation may be
## incorrect

```

```

chi.df = data.frame(chi.variable.name, chi.p.exit) # not sig different by p = 0.05 for any

```

```

numerical.variables = matched.cohort %>%
  dplyr::select(Was.plasma.given.to.the.patient.during.this.admission., Age.at.Admission, Per_Capita, S

```

```

p.value.exit = vector()
variable.name.exit = vector()

for ( i in c(2:10,12)) { # first column is plasma # skip date
  variable.1 = numerical.variables[[i]][numerical.variables$Was.plasma.given.to.the.patient.during.this
  variable.0 = numerical.variables[[i]][numerical.variables$Was.plasma.given.to.the.patient.during.this
  middle.t.test = t.test(variable.1, variable.0)
  t.test.p.value = middle.t.test$p.value
  p.value.exit[i] = t.test.p.value
  variable.name.exit[i] = colnames(numerical.variables)[i]
}

t.test.df = data.frame(variable.name.exit, p.value.exit)

## only significant different one in matching is length of stay
match.1.glm = glm(death ~ Was.plasma.given.to.the.patient.during.this.admission., data = matched.cohort
match.1.summary = summary(match.1.glm) # p value 0.003504
match.1.conf.intervals = exp(cbind(coef(match.1.glm), confint(match.1.glm))) # OR 3.1034483, CI 1.46952

```

```
## Waiting for profiling to be done...
```

There is no longer match.2. It was coded incorrectly and fixed while named match.3, so match.3 was left.

```
## okay - but what if we increase the sample size using the second saturated logisitc regression?
# this drops ferritin, d dimer and , and crp

```

```
row.names(complete.df.minus.labs) <- 1:nrow(complete.df.minus.labs) # sample size: 992

```

```
my.full.match.3 = matchit('Was plasma given to the patient during this admission?' ~ 'Insurance Class'

```

```
## Warning in model.matrix.default(tt, data = mf): the response appeared on the
## right-hand side and was dropped

```

```
## Warning in model.matrix.default(tt, data = mf): problem with term 12 in
## model.matrix: no columns are assigned

```

```
## Warning in model.matrix.default(mt, mf, contrasts): the response appeared on the
## right-hand side and was dropped

```

```
## Warning in model.matrix.default(mt, mf, contrasts): problem with term 12 in
## model.matrix: no columns are assigned

```

```
summary(my.full.match.3)

```

```
##
```

```
## Call:
```

```
## matchit(formula = 'Was plasma given to the patient during this admission?' ~
## 'Insurance Class' + 'Race:' + 'Does the patient have a history of cancer?' +
## 'Please specify: (choice=Hypertension)' + 'Please specify: (choice=Coronary Artery Disease)'
## 'Please specify: (choice=Congestive Heart Failure)' +
## 'Please specify: (choice=Asthma)' + 'Please specify: (choice=Chronic Obstructive Pulmonary D

```

```

##      'Please specify: (choice=Chronic Renal Insufficiency)' +
##      'Please specify: (choice=Cirrhosis)' + 'Did the patient receive hemodialysis during this adm
##      'Was plasma given to the patient during this admission?' +
##      'Was the patient placed in a prone position during their admission?' +
##      'COVID- Was hydroxychloroquine (Plaquenil) given during the patient's admission?' +
##      'Age at Admission' + Per_Capita + 'SIRS RR' + SIRS_WBC +
##      SIRS...110 + 'Creatinine (if 0 = N/A)' + 'Admission Date:' +
##      'Please specify: (choice=Diabetes)' + 'SIRS TEMP' + 'Please specify: (choice=Chronic- Hepati
##      data = complete.df.minus.labs, method = "nearest")
##
## Summary of balance for all data:
##
##                                     Means Treated
## distance                                     0.3159
## 'Insurance Class'COMM                       0.2857
## 'Insurance Class'MEDICAID                   0.2095
## 'Insurance Class'MEDICARE                   0.4952
## 'Insurance Class'OTHER                      0.0000
## 'Insurance Class'SP                         0.0095
## 'Race:'American Indian/Alaskan Native      0.0095
## 'Race:'Asian                                0.0286
## 'Race:'Black                                0.1143
## 'Race:'Native Hawaiian/Pacific Isle       0.0000
## 'Race:'Other                                0.0571
## 'Race:'Unknown                              0.2000
## 'Does the patient have a history of cancer?'1 0.1238
## 'Please specify: (choice=Hypertension)'1    0.5429
## 'Please specify: (choice=Coronary Artery Disease)'1 0.1714
## 'Please specify: (choice=Congestive Heart Failure)'1 0.0381
## 'Please specify: (choice=Asthma)'1          0.0381
## 'Please specify: (choice=Chronic Obstructive Pulmonary Disease)'1 0.0476
## 'Please specify: (choice=Chronic Renal Insufficiency)'1 0.0857
## 'Please specify: (choice=Cirrhosis)'1      0.0095
## 'Did the patient receive hemodialysis during this admission?'1 0.2571
## 'Was the patient placed in a prone position during their admission?'1 0.4286
## 'COVID- Was hydroxychloroquine (Plaquenil) given during the patient's admission?'1 0.4952
## 'Age at Admission'                          67.5238
## Per_Capita                                  51696.9048
## 'SIRS RR'                                   0.8190
## SIRS_WBC                                    0.3333
## SIRS...110                                  2.1143
## 'Creatinine (if 0 = N/A)'                   1.1676
## 'Admission Date:'                           18369.2286
## 'Please specify: (choice=Diabetes)'1         0.3429
## 'SIRS TEMP'                                 0.2476
## 'Please specify: (choice=Chronic- Hepatitis C)'1 0.0190
##
##                                     Means Control
## distance                                     0.0810
## 'Insurance Class'COMM                       0.2807
## 'Insurance Class'MEDICAID                   0.1917
## 'Insurance Class'MEDICARE                   0.5152
## 'Insurance Class'OTHER                      0.0011
## 'Insurance Class'SP                         0.0113
## 'Race:'American Indian/Alaskan Native      0.0045
## 'Race:'Asian                                0.0203

```



|                                                                                       |            |
|---------------------------------------------------------------------------------------|------------|
| ## 'Race:'Black                                                                       | 0.2074     |
| ## 'Race:'Native Hawaiian/Pacific Isle                                                | 0.0011     |
| ## 'Race:'Other                                                                       | 0.0474     |
| ## 'Race:'Unknown                                                                     | 0.1466     |
| ## 'Does the patient have a history of cancer?'1                                      | 0.1578     |
| ## 'Please specify: (choice=Hypertension)'1                                           | 0.5344     |
| ## 'Please specify: (choice=Coronary Artery Disease)'1                                | 0.1319     |
| ## 'Please specify: (choice=Congestive Heart Failure)'1                               | 0.0609     |
| ## 'Please specify: (choice=Asthma)'1                                                 | 0.0665     |
| ## 'Please specify: (choice=Chronic Obstructive Pulmonary Disease)'1                  | 0.0778     |
| ## 'Please specify: (choice=Chronic Renal Insufficiency)'1                            | 0.0699     |
| ## 'Please specify: (choice=Cirrhosis)'1                                              | 0.0101     |
| ## 'Did the patient receive hemodialysis during this admission?'1                     | 0.0474     |
| ## 'Was the patient placed in a prone position during their admission?'1              | 0.1522     |
| ## 'COVID- Was hydroxychloroquine (Plaquenil) given during the patient's admission?'1 | 0.3337     |
| ## 'Age at Admission'                                                                 | 66.2356    |
| ## Per_Capita                                                                         | 51175.9899 |
| ## 'SIRS RR'                                                                          | 0.6731     |
| ## SIRS_WBC                                                                           | 0.2368     |
| ## SIRS...110                                                                         | 1.7294     |
| ## 'Creatinine (if 0 = N/A)'                                                          | 1.3526     |
| ## 'Admission Date:'                                                                  | 18362.3946 |
| ## 'Please specify: (choice=Diabetes)'1                                               | 0.3157     |
| ## 'SIRS TEMP'                                                                        | 0.2480     |
| ## 'Please specify: (choice=Chronic- Hepatitis C)'1                                   | 0.0056     |
| ##                                                                                    | SD Control |
| ## distance                                                                           | 0.1018     |
| ## 'Insurance Class'COMM                                                              | 0.4496     |
| ## 'Insurance Class'MEDICAID                                                          | 0.3938     |
| ## 'Insurance Class'MEDICARE                                                          | 0.5001     |
| ## 'Insurance Class'OTHER                                                             | 0.0336     |
| ## 'Insurance Class'SP                                                                | 0.1056     |
| ## 'Race:'American Indian/Alaskan Native                                              | 0.0670     |
| ## 'Race:'Asian                                                                       | 0.1411     |
| ## 'Race:'Black                                                                       | 0.4057     |
| ## 'Race:'Native Hawaiian/Pacific Isle                                                | 0.0336     |
| ## 'Race:'Other                                                                       | 0.2125     |
| ## 'Race:'Unknown                                                                     | 0.3539     |
| ## 'Does the patient have a history of cancer?'1                                      | 0.3648     |
| ## 'Please specify: (choice=Hypertension)'1                                           | 0.4991     |
| ## 'Please specify: (choice=Coronary Artery Disease)'1                                | 0.3386     |
| ## 'Please specify: (choice=Congestive Heart Failure)'1                               | 0.2392     |
| ## 'Please specify: (choice=Asthma)'1                                                 | 0.2493     |
| ## 'Please specify: (choice=Chronic Obstructive Pulmonary Disease)'1                  | 0.2680     |
| ## 'Please specify: (choice=Chronic Renal Insufficiency)'1                            | 0.2551     |
| ## 'Please specify: (choice=Cirrhosis)'1                                              | 0.1003     |
| ## 'Did the patient receive hemodialysis during this admission?'1                     | 0.2125     |
| ## 'Was the patient placed in a prone position during their admission?'1              | 0.3594     |
| ## 'COVID- Was hydroxychloroquine (Plaquenil) given during the patient's admission?'1 | 0.4718     |
| ## 'Age at Admission'                                                                 | 17.7951    |
| ## Per_Capita                                                                         | 24367.9005 |
| ## 'SIRS RR'                                                                          | 0.4694     |
| ## SIRS_WBC                                                                           | 0.4253     |
| ## SIRS...110                                                                         | 1.0073     |

|                                                                                       |           |
|---------------------------------------------------------------------------------------|-----------|
| ## 'Creatinine (if 0 = N/A)'                                                          | 1.6524    |
| ## 'Admission Date:'                                                                  | 15.9847   |
| ## 'Please specify: (choice=Diabetes)'1                                               | 0.4650    |
| ## 'SIRS TEMP'                                                                        | 0.4321    |
| ## 'Please specify: (choice=Chronic- Hepatitis C)'1                                   | 0.0749    |
| ##                                                                                    | Mean Diff |
| ## distance                                                                           | 0.2349    |
| ## 'Insurance Class'COMM                                                              | 0.0050    |
| ## 'Insurance Class'MEDICAID                                                          | 0.0179    |
| ## 'Insurance Class'MEDICARE                                                          | -0.0200   |
| ## 'Insurance Class'OTHER                                                             | -0.0011   |
| ## 'Insurance Class'SP                                                                | -0.0018   |
| ## 'Race:'American Indian/Alaskan Native                                              | 0.0050    |
| ## 'Race:'Asian                                                                       | 0.0083    |
| ## 'Race:'Black                                                                       | -0.0932   |
| ## 'Race:'Native Hawaiian/Pacific Isle                                                | -0.0011   |
| ## 'Race:'Other                                                                       | 0.0098    |
| ## 'Race:'Unknown                                                                     | 0.0534    |
| ## 'Does the patient have a history of cancer?'1                                      | -0.0340   |
| ## 'Please specify: (choice=Hypertension)'1                                           | 0.0085    |
| ## 'Please specify: (choice=Coronary Artery Disease)'1                                | 0.0395    |
| ## 'Please specify: (choice=Congestive Heart Failure)'1                               | -0.0228   |
| ## 'Please specify: (choice=Asthma)'1                                                 | -0.0284   |
| ## 'Please specify: (choice=Chronic Obstructive Pulmonary Disease)'1                  | -0.0302   |
| ## 'Please specify: (choice=Chronic Renal Insufficiency)'1                            | 0.0158    |
| ## 'Please specify: (choice=Cirrhosis)'1                                              | -0.0006   |
| ## 'Did the patient receive hemodialysis during this admission?'1                     | 0.2098    |
| ## 'Was the patient placed in a prone position during their admission?'1              | 0.2764    |
| ## 'COVID- Was hydroxychloroquine (Plaquenil) given during the patient's admission?'1 | 0.1615    |
| ## 'Age at Admission'                                                                 | 1.2882    |
| ## Per_Capita                                                                         | 520.9149  |
| ## 'SIRS RR'                                                                          | 0.1460    |
| ## SIRS_WBC                                                                           | 0.0966    |
| ## SIRS...110                                                                         | 0.3849    |
| ## 'Creatinine (if 0 = N/A)'                                                          | -0.1850   |
| ## 'Admission Date:'                                                                  | 6.8340    |
| ## 'Please specify: (choice=Diabetes)'1                                               | 0.0272    |
| ## 'SIRS TEMP'                                                                        | -0.0004   |
| ## 'Please specify: (choice=Chronic- Hepatitis C)'1                                   | 0.0134    |
| ##                                                                                    | eQQ Med   |
| ## distance                                                                           | 0.1697    |
| ## 'Insurance Class'COMM                                                              | 0.0000    |
| ## 'Insurance Class'MEDICAID                                                          | 0.0000    |
| ## 'Insurance Class'MEDICARE                                                          | 0.0000    |
| ## 'Insurance Class'OTHER                                                             | 0.0000    |
| ## 'Insurance Class'SP                                                                | 0.0000    |
| ## 'Race:'American Indian/Alaskan Native                                              | 0.0000    |
| ## 'Race:'Asian                                                                       | 0.0000    |
| ## 'Race:'Black                                                                       | 0.0000    |
| ## 'Race:'Native Hawaiian/Pacific Isle                                                | 0.0000    |
| ## 'Race:'Other                                                                       | 0.0000    |
| ## 'Race:'Unknown                                                                     | 0.0000    |
| ## 'Does the patient have a history of cancer?'1                                      | 0.0000    |
| ## 'Please specify: (choice=Hypertension)'1                                           | 0.0000    |

|                                                                                       |           |
|---------------------------------------------------------------------------------------|-----------|
| ## 'Please specify: (choice=Coronary Artery Disease)'1                                | 0.0000    |
| ## 'Please specify: (choice=Congestive Heart Failure)'1                               | 0.0000    |
| ## 'Please specify: (choice=Asthma)'1                                                 | 0.0000    |
| ## 'Please specify: (choice=Chronic Obstructive Pulmonary Disease)'1                  | 0.0000    |
| ## 'Please specify: (choice=Chronic Renal Insufficiency)'1                            | 0.0000    |
| ## 'Please specify: (choice=Cirrhosis)'1                                              | 0.0000    |
| ## 'Did the patient receive hemodialysis during this admission?'1                     | 0.0000    |
| ## 'Was the patient placed in a prone position during their admission?'1              | 0.0000    |
| ## 'COVID- Was hydroxychloroquine (Plaquenil) given during the patient's admission?'1 | 0.0000    |
| ## 'Age at Admission'                                                                 | 3.0000    |
| ## Per_Capita                                                                         | 835.0000  |
| ## 'SIRS RR'                                                                          | 0.0000    |
| ## SIRS_WBC                                                                           | 0.0000    |
| ## SIRS...110                                                                         | 0.0000    |
| ## 'Creatinine (if 0 = N/A)'                                                          | 0.1000    |
| ## 'Admission Date:'                                                                  | 8.0000    |
| ## 'Please specify: (choice=Diabetes)'1                                               | 0.0000    |
| ## 'SIRS TEMP'                                                                        | 0.0000    |
| ## 'Please specify: (choice=Chronic- Hepatitis C)'1                                   | 0.0000    |
| ##                                                                                    | eQQ Mean  |
| ## distance                                                                           | 0.2315    |
| ## 'Insurance Class'COMM                                                              | 0.0000    |
| ## 'Insurance Class'MEDICAID                                                          | 0.0190    |
| ## 'Insurance Class'MEDICARE                                                          | 0.0190    |
| ## 'Insurance Class'OTHER                                                             | 0.0095    |
| ## 'Insurance Class'SP                                                                | 0.0095    |
| ## 'Race:'American Indian/Alaskan Native                                              | 0.0000    |
| ## 'Race:'Asian                                                                       | 0.0095    |
| ## 'Race:'Black                                                                       | 0.0952    |
| ## 'Race:'Native Hawaiian/Pacific Isle                                                | 0.0095    |
| ## 'Race:'Other                                                                       | 0.0095    |
| ## 'Race:'Unknown                                                                     | 0.0476    |
| ## 'Does the patient have a history of cancer?'1                                      | 0.0381    |
| ## 'Please specify: (choice=Hypertension)'1                                           | 0.0095    |
| ## 'Please specify: (choice=Coronary Artery Disease)'1                                | 0.0381    |
| ## 'Please specify: (choice=Congestive Heart Failure)'1                               | 0.0286    |
| ## 'Please specify: (choice=Asthma)'1                                                 | 0.0286    |
| ## 'Please specify: (choice=Chronic Obstructive Pulmonary Disease)'1                  | 0.0286    |
| ## 'Please specify: (choice=Chronic Renal Insufficiency)'1                            | 0.0095    |
| ## 'Please specify: (choice=Cirrhosis)'1                                              | 0.0000    |
| ## 'Did the patient receive hemodialysis during this admission?'1                     | 0.2095    |
| ## 'Was the patient placed in a prone position during their admission?'1              | 0.2762    |
| ## 'COVID- Was hydroxychloroquine (Plaquenil) given during the patient's admission?'1 | 0.1619    |
| ## 'Age at Admission'                                                                 | 4.0381    |
| ## Per_Capita                                                                         | 4010.7714 |
| ## 'SIRS RR'                                                                          | 0.1524    |
| ## SIRS_WBC                                                                           | 0.0952    |
| ## SIRS...110                                                                         | 0.3905    |
| ## 'Creatinine (if 0 = N/A)'                                                          | 0.2810    |
| ## 'Admission Date:'                                                                  | 7.6286    |
| ## 'Please specify: (choice=Diabetes)'1                                               | 0.0286    |
| ## 'SIRS TEMP'                                                                        | 0.0000    |
| ## 'Please specify: (choice=Chronic- Hepatitis C)'1                                   | 0.0095    |
| ##                                                                                    | eQQ Max   |

|                                                                                       |               |
|---------------------------------------------------------------------------------------|---------------|
| ## distance                                                                           | 0.5755        |
| ## 'Insurance Class'COMM                                                              | 0.0000        |
| ## 'Insurance Class'MEDICAID                                                          | 1.0000        |
| ## 'Insurance Class'MEDICARE                                                          | 1.0000        |
| ## 'Insurance Class'OTHER                                                             | 1.0000        |
| ## 'Insurance Class'SP                                                                | 1.0000        |
| ## 'Race:'American Indian/Alaskan Native                                              | 0.0000        |
| ## 'Race:'Asian                                                                       | 1.0000        |
| ## 'Race:'Black                                                                       | 1.0000        |
| ## 'Race:'Native Hawaiian/Pacific Isle                                                | 1.0000        |
| ## 'Race:'Other                                                                       | 1.0000        |
| ## 'Race:'Unknown                                                                     | 1.0000        |
| ## 'Does the patient have a history of cancer?'1                                      | 1.0000        |
| ## 'Please specify: (choice=Hypertension)'1                                           | 1.0000        |
| ## 'Please specify: (choice=Coronary Artery Disease)'1                                | 1.0000        |
| ## 'Please specify: (choice=Congestive Heart Failure)'1                               | 1.0000        |
| ## 'Please specify: (choice=Asthma)'1                                                 | 1.0000        |
| ## 'Please specify: (choice=Chronic Obstructive Pulmonary Disease)'1                  | 1.0000        |
| ## 'Please specify: (choice=Chronic Renal Insufficiency)'1                            | 1.0000        |
| ## 'Please specify: (choice=Cirrhosis)'1                                              | 0.0000        |
| ## 'Did the patient receive hemodialysis during this admission?'1                     | 1.0000        |
| ## 'Was the patient placed in a prone position during their admission?'1              | 1.0000        |
| ## 'COVID- Was hydroxychloroquine (Plaquenil) given during the patient's admission?'1 | 1.0000        |
| ## 'Age at Admission'                                                                 | 23.0000       |
| ## Per_Capita                                                                         | 263789.0000   |
| ## 'SIRS RR'                                                                          | 1.0000        |
| ## SIRS_WBC                                                                           | 1.0000        |
| ## SIRS...110                                                                         | 1.0000        |
| ## 'Creatinine (if 0 = N/A)'                                                          | 7.7000        |
| ## 'Admission Date:'                                                                  | 19.0000       |
| ## 'Please specify: (choice=Diabetes)'1                                               | 1.0000        |
| ## 'SIRS TEMP'                                                                        | 0.0000        |
| ## 'Please specify: (choice=Chronic- Hepatitis C)'1                                   | 1.0000        |
| ##                                                                                    |               |
| ##                                                                                    |               |
| ## Summary of balance for matched data:                                               |               |
| ##                                                                                    | Means Treated |
| ## distance                                                                           | 0.3159        |
| ## 'Insurance Class'COMM                                                              | 0.2857        |
| ## 'Insurance Class'MEDICAID                                                          | 0.2095        |
| ## 'Insurance Class'MEDICARE                                                          | 0.4952        |
| ## 'Insurance Class'OTHER                                                             | 0.0000        |
| ## 'Insurance Class'SP                                                                | 0.0095        |
| ## 'Race:'American Indian/Alaskan Native                                              | 0.0095        |
| ## 'Race:'Asian                                                                       | 0.0286        |
| ## 'Race:'Black                                                                       | 0.1143        |
| ## 'Race:'Native Hawaiian/Pacific Isle                                                | 0.0000        |
| ## 'Race:'Other                                                                       | 0.0571        |
| ## 'Race:'Unknown                                                                     | 0.2000        |
| ## 'Does the patient have a history of cancer?'1                                      | 0.1238        |
| ## 'Please specify: (choice=Hypertension)'1                                           | 0.5429        |
| ## 'Please specify: (choice=Coronary Artery Disease)'1                                | 0.1714        |
| ## 'Please specify: (choice=Congestive Heart Failure)'1                               | 0.0381        |
| ## 'Please specify: (choice=Asthma)'1                                                 | 0.0381        |

|                                                                                       |               |
|---------------------------------------------------------------------------------------|---------------|
| ## 'Please specify: (choice=Chronic Obstructive Pulmonary Disease)'1                  | 0.0476        |
| ## 'Please specify: (choice=Chronic Renal Insufficiency)'1                            | 0.0857        |
| ## 'Please specify: (choice=Cirrhosis)'1                                              | 0.0095        |
| ## 'Did the patient receive hemodialysis during this admission?'1                     | 0.2571        |
| ## 'Was the patient placed in a prone position during their admission?'1              | 0.4286        |
| ## 'COVID- Was hydroxychloroquine (Plaquenil) given during the patient's admission?'1 | 0.4952        |
| ## 'Age at Admission'                                                                 | 67.5238       |
| ## Per_Capita                                                                         | 51696.9048    |
| ## 'SIRS RR'                                                                          | 0.8190        |
| ## SIRS_WBC                                                                           | 0.3333        |
| ## SIRS...110                                                                         | 2.1143        |
| ## 'Creatinine (if 0 = N/A)'                                                          | 1.1676        |
| ## 'Admission Date:'                                                                  | 18369.2286    |
| ## 'Please specify: (choice=Diabetes)'1                                               | 0.3429        |
| ## 'SIRS TEMP'                                                                        | 0.2476        |
| ## 'Please specify: (choice=Chronic- Hepatitis C)'1                                   | 0.0190        |
| ##                                                                                    | Means Control |
| ## distance                                                                           | 0.2502        |
| ## 'Insurance Class'COMM                                                              | 0.2857        |
| ## 'Insurance Class'MEDICAID                                                          | 0.1905        |
| ## 'Insurance Class'MEDICARE                                                          | 0.5238        |
| ## 'Insurance Class'OTHER                                                             | 0.0000        |
| ## 'Insurance Class'SP                                                                | 0.0000        |
| ## 'Race:'American Indian/Alaskan Native                                              | 0.0190        |
| ## 'Race:'Asian                                                                       | 0.0286        |
| ## 'Race:'Black                                                                       | 0.1143        |
| ## 'Race:'Native Hawaiian/Pacific Isle                                                | 0.0000        |
| ## 'Race:'Other                                                                       | 0.0381        |
| ## 'Race:'Unknown                                                                     | 0.2286        |
| ## 'Does the patient have a history of cancer?'1                                      | 0.1429        |
| ## 'Please specify: (choice=Hypertension)'1                                           | 0.5429        |
| ## 'Please specify: (choice=Coronary Artery Disease)'1                                | 0.1810        |
| ## 'Please specify: (choice=Congestive Heart Failure)'1                               | 0.0571        |
| ## 'Please specify: (choice=Asthma)'1                                                 | 0.0190        |
| ## 'Please specify: (choice=Chronic Obstructive Pulmonary Disease)'1                  | 0.0571        |
| ## 'Please specify: (choice=Chronic Renal Insufficiency)'1                            | 0.0952        |
| ## 'Please specify: (choice=Cirrhosis)'1                                              | 0.0190        |
| ## 'Did the patient receive hemodialysis during this admission?'1                     | 0.1714        |
| ## 'Was the patient placed in a prone position during their admission?'1              | 0.4762        |
| ## 'COVID- Was hydroxychloroquine (Plaquenil) given during the patient's admission?'1 | 0.4667        |
| ## 'Age at Admission'                                                                 | 68.4000       |
| ## Per_Capita                                                                         | 50263.6667    |
| ## 'SIRS RR'                                                                          | 0.8190        |
| ## SIRS_WBC                                                                           | 0.3238        |
| ## SIRS...110                                                                         | 2.0286        |
| ## 'Creatinine (if 0 = N/A)'                                                          | 1.3010        |
| ## 'Admission Date:'                                                                  | 18369.2381    |
| ## 'Please specify: (choice=Diabetes)'1                                               | 0.3524        |
| ## 'SIRS TEMP'                                                                        | 0.2762        |
| ## 'Please specify: (choice=Chronic- Hepatitis C)'1                                   | 0.0190        |
| ##                                                                                    | SD Control    |
| ## distance                                                                           | 0.1847        |
| ## 'Insurance Class'COMM                                                              | 0.4539        |
| ## 'Insurance Class'MEDICAID                                                          | 0.3946        |

|                                                                                       |            |
|---------------------------------------------------------------------------------------|------------|
| ## 'Insurance Class'MEDICARE                                                          | 0.5018     |
| ## 'Insurance Class'OTHER                                                             | 0.0000     |
| ## 'Insurance Class'SP                                                                | 0.0000     |
| ## 'Race:'American Indian/Alaskan Native                                              | 0.1373     |
| ## 'Race:'Asian                                                                       | 0.1674     |
| ## 'Race:'Black                                                                       | 0.3197     |
| ## 'Race:'Native Hawaiian/Pacific Isle                                                | 0.0000     |
| ## 'Race:'Other                                                                       | 0.1923     |
| ## 'Race:'Unknown                                                                     | 0.4219     |
| ## 'Does the patient have a history of cancer?'1                                      | 0.3516     |
| ## 'Please specify: (choice=Hypertension)'1                                           | 0.5005     |
| ## 'Please specify: (choice=Coronary Artery Disease)'1                                | 0.3868     |
| ## 'Please specify: (choice=Congestive Heart Failure)'1                               | 0.2332     |
| ## 'Please specify: (choice=Asthma)'1                                                 | 0.1373     |
| ## 'Please specify: (choice=Chronic Obstructive Pulmonary Disease)'1                  | 0.2332     |
| ## 'Please specify: (choice=Chronic Renal Insufficiency)'1                            | 0.2950     |
| ## 'Please specify: (choice=Cirrhosis)'1                                              | 0.1373     |
| ## 'Did the patient receive hemodialysis during this admission?'1                     | 0.3787     |
| ## 'Was the patient placed in a prone position during their admission?'1              | 0.5018     |
| ## 'COVID- Was hydroxychloroquine (Plaquenil) given during the patient's admission?'1 | 0.5013     |
| ## 'Age at Admission'                                                                 | 15.5678    |
| ## Per_Capita                                                                         | 21305.8289 |
| ## 'SIRS RR'                                                                          | 0.3868     |
| ## SIRS_WBC                                                                           | 0.4702     |
| ## SIRS...110                                                                         | 0.9851     |
| ## 'Creatinine (if 0 = N/A)'                                                          | 1.1751     |
| ## 'Admission Date:'                                                                  | 18.9145    |
| ## 'Please specify: (choice=Diabetes)'1                                               | 0.4800     |
| ## 'SIRS TEMP'                                                                        | 0.4493     |
| ## 'Please specify: (choice=Chronic- Hepatitis C)'1                                   | 0.1373     |
| ##                                                                                    | Mean Diff  |
| ## distance                                                                           | 0.0658     |
| ## 'Insurance Class'COMM                                                              | 0.0000     |
| ## 'Insurance Class'MEDICAID                                                          | 0.0190     |
| ## 'Insurance Class'MEDICARE                                                          | -0.0286    |
| ## 'Insurance Class'OTHER                                                             | 0.0000     |
| ## 'Insurance Class'SP                                                                | 0.0095     |
| ## 'Race:'American Indian/Alaskan Native                                              | -0.0095    |
| ## 'Race:'Asian                                                                       | 0.0000     |
| ## 'Race:'Black                                                                       | 0.0000     |
| ## 'Race:'Native Hawaiian/Pacific Isle                                                | 0.0000     |
| ## 'Race:'Other                                                                       | 0.0190     |
| ## 'Race:'Unknown                                                                     | -0.0286    |
| ## 'Does the patient have a history of cancer?'1                                      | -0.0190    |
| ## 'Please specify: (choice=Hypertension)'1                                           | 0.0000     |
| ## 'Please specify: (choice=Coronary Artery Disease)'1                                | -0.0095    |
| ## 'Please specify: (choice=Congestive Heart Failure)'1                               | -0.0190    |
| ## 'Please specify: (choice=Asthma)'1                                                 | 0.0190     |
| ## 'Please specify: (choice=Chronic Obstructive Pulmonary Disease)'1                  | -0.0095    |
| ## 'Please specify: (choice=Chronic Renal Insufficiency)'1                            | -0.0095    |
| ## 'Please specify: (choice=Cirrhosis)'1                                              | -0.0095    |
| ## 'Did the patient receive hemodialysis during this admission?'1                     | 0.0857     |
| ## 'Was the patient placed in a prone position during their admission?'1              | -0.0476    |
| ## 'COVID- Was hydroxychloroquine (Plaquenil) given during the patient's admission?'1 | 0.0286     |

|                                                                                       |           |
|---------------------------------------------------------------------------------------|-----------|
| ## 'Age at Admission'                                                                 | -0.8762   |
| ## Per_Capita                                                                         | 1433.2381 |
| ## 'SIRS RR'                                                                          | 0.0000    |
| ## SIRS_WBC                                                                           | 0.0095    |
| ## SIRS...110                                                                         | 0.0857    |
| ## 'Creatinine (if 0 = N/A)'                                                          | -0.1333   |
| ## 'Admission Date:'                                                                  | -0.0095   |
| ## 'Please specify: (choice=Diabetes)'1                                               | -0.0095   |
| ## 'SIRS TEMP'                                                                        | -0.0286   |
| ## 'Please specify: (choice=Chronic- Hepatitis C)'1                                   | 0.0000    |
| ##                                                                                    | eQQ Med   |
| ## distance                                                                           | 0.0008    |
| ## 'Insurance Class'COMM                                                              | 0.0000    |
| ## 'Insurance Class'MEDICAID                                                          | 0.0000    |
| ## 'Insurance Class'MEDICARE                                                          | 0.0000    |
| ## 'Insurance Class'OTHER                                                             | 0.0000    |
| ## 'Insurance Class'SP                                                                | 0.0000    |
| ## 'Race:'American Indian/Alaskan Native                                              | 0.0000    |
| ## 'Race:'Asian                                                                       | 0.0000    |
| ## 'Race:'Black                                                                       | 0.0000    |
| ## 'Race:'Native Hawaiian/Pacific Isle                                                | 0.0000    |
| ## 'Race:'Other                                                                       | 0.0000    |
| ## 'Race:'Unknown                                                                     | 0.0000    |
| ## 'Does the patient have a history of cancer?'1                                      | 0.0000    |
| ## 'Please specify: (choice=Hypertension)'1                                           | 0.0000    |
| ## 'Please specify: (choice=Coronary Artery Disease)'1                                | 0.0000    |
| ## 'Please specify: (choice=Congestive Heart Failure)'1                               | 0.0000    |
| ## 'Please specify: (choice=Asthma)'1                                                 | 0.0000    |
| ## 'Please specify: (choice=Chronic Obstructive Pulmonary Disease)'1                  | 0.0000    |
| ## 'Please specify: (choice=Chronic Renal Insufficiency)'1                            | 0.0000    |
| ## 'Please specify: (choice=Cirrhosis)'1                                              | 0.0000    |
| ## 'Did the patient receive hemodialysis during this admission?'1                     | 0.0000    |
| ## 'Was the patient placed in a prone position during their admission?'1              | 0.0000    |
| ## 'COVID- Was hydroxychloroquine (Plaquenil) given during the patient's admission?'1 | 0.0000    |
| ## 'Age at Admission'                                                                 | 3.0000    |
| ## Per_Capita                                                                         | 1202.0000 |
| ## 'SIRS RR'                                                                          | 0.0000    |
| ## SIRS_WBC                                                                           | 0.0000    |
| ## SIRS...110                                                                         | 0.0000    |
| ## 'Creatinine (if 0 = N/A)'                                                          | 0.1000    |
| ## 'Admission Date:'                                                                  | 3.0000    |
| ## 'Please specify: (choice=Diabetes)'1                                               | 0.0000    |
| ## 'SIRS TEMP'                                                                        | 0.0000    |
| ## 'Please specify: (choice=Chronic- Hepatitis C)'1                                   | 0.0000    |
| ##                                                                                    | eQQ Mean  |
| ## distance                                                                           | 0.0659    |
| ## 'Insurance Class'COMM                                                              | 0.0000    |
| ## 'Insurance Class'MEDICAID                                                          | 0.0190    |
| ## 'Insurance Class'MEDICARE                                                          | 0.0286    |
| ## 'Insurance Class'OTHER                                                             | 0.0000    |
| ## 'Insurance Class'SP                                                                | 0.0095    |
| ## 'Race:'American Indian/Alaskan Native                                              | 0.0095    |
| ## 'Race:'Asian                                                                       | 0.0000    |
| ## 'Race:'Black                                                                       | 0.0000    |

|                                                                                       |            |
|---------------------------------------------------------------------------------------|------------|
| ## 'Race:'Native Hawaiian/Pacific Isle                                                | 0.0000     |
| ## 'Race:'Other                                                                       | 0.0190     |
| ## 'Race:'Unknown                                                                     | 0.0286     |
| ## 'Does the patient have a history of cancer?'1                                      | 0.0190     |
| ## 'Please specify: (choice=Hypertension)'1                                           | 0.0000     |
| ## 'Please specify: (choice=Coronary Artery Disease)'1                                | 0.0095     |
| ## 'Please specify: (choice=Congestive Heart Failure)'1                               | 0.0190     |
| ## 'Please specify: (choice=Asthma)'1                                                 | 0.0190     |
| ## 'Please specify: (choice=Chronic Obstructive Pulmonary Disease)'1                  | 0.0095     |
| ## 'Please specify: (choice=Chronic Renal Insufficiency)'1                            | 0.0095     |
| ## 'Please specify: (choice=Cirrhosis)'1                                              | 0.0095     |
| ## 'Did the patient receive hemodialysis during this admission?'1                     | 0.0857     |
| ## 'Was the patient placed in a prone position during their admission?'1              | 0.0476     |
| ## 'COVID- Was hydroxychloroquine (Plaquenil) given during the patient's admission?'1 | 0.0286     |
| ## 'Age at Admission'                                                                 | 2.7238     |
| ## Per_Capita                                                                         | 2257.5619  |
| ## 'SIRS RR'                                                                          | 0.0000     |
| ## SIRS_WBC                                                                           | 0.0095     |
| ## SIRS...110                                                                         | 0.1238     |
| ## 'Creatinine (if 0 = N/A)'                                                          | 0.2476     |
| ## 'Admission Date:'                                                                  | 4.3524     |
| ## 'Please specify: (choice=Diabetes)'1                                               | 0.0095     |
| ## 'SIRS TEMP'                                                                        | 0.0286     |
| ## 'Please specify: (choice=Chronic- Hepatitis C)'1                                   | 0.0000     |
| ##                                                                                    | eQQ Max    |
| ## distance                                                                           | 0.2806     |
| ## 'Insurance Class'COMM                                                              | 0.0000     |
| ## 'Insurance Class'MEDICAID                                                          | 1.0000     |
| ## 'Insurance Class'MEDICARE                                                          | 1.0000     |
| ## 'Insurance Class'OTHER                                                             | 0.0000     |
| ## 'Insurance Class'SP                                                                | 1.0000     |
| ## 'Race:'American Indian/Alaskan Native                                              | 1.0000     |
| ## 'Race:'Asian                                                                       | 0.0000     |
| ## 'Race:'Black                                                                       | 0.0000     |
| ## 'Race:'Native Hawaiian/Pacific Isle                                                | 0.0000     |
| ## 'Race:'Other                                                                       | 1.0000     |
| ## 'Race:'Unknown                                                                     | 1.0000     |
| ## 'Does the patient have a history of cancer?'1                                      | 1.0000     |
| ## 'Please specify: (choice=Hypertension)'1                                           | 0.0000     |
| ## 'Please specify: (choice=Coronary Artery Disease)'1                                | 1.0000     |
| ## 'Please specify: (choice=Congestive Heart Failure)'1                               | 1.0000     |
| ## 'Please specify: (choice=Asthma)'1                                                 | 1.0000     |
| ## 'Please specify: (choice=Chronic Obstructive Pulmonary Disease)'1                  | 1.0000     |
| ## 'Please specify: (choice=Chronic Renal Insufficiency)'1                            | 1.0000     |
| ## 'Please specify: (choice=Cirrhosis)'1                                              | 1.0000     |
| ## 'Did the patient receive hemodialysis during this admission?'1                     | 1.0000     |
| ## 'Was the patient placed in a prone position during their admission?'1              | 1.0000     |
| ## 'COVID- Was hydroxychloroquine (Plaquenil) given during the patient's admission?'1 | 1.0000     |
| ## 'Age at Admission'                                                                 | 9.0000     |
| ## Per_Capita                                                                         | 19521.0000 |
| ## 'SIRS RR'                                                                          | 0.0000     |
| ## SIRS_WBC                                                                           | 1.0000     |
| ## SIRS...110                                                                         | 1.0000     |
| ## 'Creatinine (if 0 = N/A)'                                                          | 4.2000     |



|                                                                                       |            |
|---------------------------------------------------------------------------------------|------------|
| ## 'Admission Date:'                                                                  | 19.0000    |
| ## 'Please specify: (choice=Diabetes)'1                                               | 1.0000     |
| ## 'SIRS TEMP'                                                                        | 1.0000     |
| ## 'Please specify: (choice=Chronic- Hepatitis C)'1                                   | 0.0000     |
| ##                                                                                    |            |
| ## Percent Balance Improvement:                                                       |            |
| ##                                                                                    | Mean Diff. |
| ## distance                                                                           | 72.0139    |
| ## 'Insurance Class'COMM                                                              | 100.0000   |
| ## 'Insurance Class'MEDICAID                                                          | -6.6106    |
| ## 'Insurance Class'MEDICARE                                                          | -42.9876   |
| ## 'Insurance Class'OTHER                                                             | 100.0000   |
| ## 'Insurance Class'SP                                                                | -444.1718  |
| ## 'Race:'American Indian/Alaskan Native                                              | -89.9358   |
| ## 'Race:'Asian                                                                       | 100.0000   |
| ## 'Race:'Black                                                                       | 100.0000   |
| ## 'Race:'Native Hawaiian/Pacific Isle                                                | 100.0000   |
| ## 'Race:'Other                                                                       | -94.5175   |
| ## 'Race:'Unknown                                                                     | 46.5341    |
| ## 'Does the patient have a history of cancer?'1                                      | 44.0202    |
| ## 'Please specify: (choice=Hypertension)'1                                           | 100.0000   |
| ## 'Please specify: (choice=Coronary Artery Disease)'1                                | 75.9033    |
| ## 'Please specify: (choice=Congestive Heart Failure)'1                               | 16.3996    |
| ## 'Please specify: (choice=Asthma)'1                                                 | 32.9807    |
| ## 'Please specify: (choice=Chronic Obstructive Pulmonary Disease)'1                  | 68.4342    |
| ## 'Please specify: (choice=Chronic Renal Insufficiency)'1                            | 39.7828    |
| ## 'Please specify: (choice=Cirrhosis)'1                                              | -1429.3103 |
| ## 'Did the patient receive hemodialysis during this admission?'1                     | 59.1433    |
| ## 'Was the patient placed in a prone position during their admission?'1              | 82.7700    |
| ## 'COVID- Was hydroxychloroquine (Plaquenil) given during the patient's admission?'1 | 82.3119    |
| ## 'Age at Admission'                                                                 | 31.9825    |
| ## Per_Capita                                                                         | -175.1386  |
| ## 'SIRS RR'                                                                          | 100.0000   |
| ## SIRS_WBC                                                                           | 90.1390    |
| ## SIRS...110                                                                         | 77.7285    |
| ## 'Creatinine (if 0 = N/A)'                                                          | 27.9397    |
| ## 'Admission Date:'                                                                  | 99.8606    |
| ## 'Please specify: (choice=Diabetes)'1                                               | 64.9684    |
| ## 'SIRS TEMP'                                                                        | -6902.6316 |
| ## 'Please specify: (choice=Chronic- Hepatitis C)'1                                   | 100.0000   |
| ##                                                                                    | eQQ Med    |
| ## distance                                                                           | 99.5373    |
| ## 'Insurance Class'COMM                                                              | 0.0000     |
| ## 'Insurance Class'MEDICAID                                                          | 0.0000     |
| ## 'Insurance Class'MEDICARE                                                          | 0.0000     |
| ## 'Insurance Class'OTHER                                                             | 0.0000     |
| ## 'Insurance Class'SP                                                                | 0.0000     |
| ## 'Race:'American Indian/Alaskan Native                                              | 0.0000     |
| ## 'Race:'Asian                                                                       | 0.0000     |
| ## 'Race:'Black                                                                       | 0.0000     |
| ## 'Race:'Native Hawaiian/Pacific Isle                                                | 0.0000     |
| ## 'Race:'Other                                                                       | 0.0000     |
| ## 'Race:'Unknown                                                                     | 0.0000     |
| ## 'Does the patient have a history of cancer?'1                                      | 0.0000     |

|                                                                                       |           |
|---------------------------------------------------------------------------------------|-----------|
| ## 'Please specify: (choice=Hypertension)'1                                           | 0.0000    |
| ## 'Please specify: (choice=Coronary Artery Disease)'1                                | 0.0000    |
| ## 'Please specify: (choice=Congestive Heart Failure)'1                               | 0.0000    |
| ## 'Please specify: (choice=Asthma)'1                                                 | 0.0000    |
| ## 'Please specify: (choice=Chronic Obstructive Pulmonary Disease)'1                  | 0.0000    |
| ## 'Please specify: (choice=Chronic Renal Insufficiency)'1                            | 0.0000    |
| ## 'Please specify: (choice=Cirrhosis)'1                                              | 0.0000    |
| ## 'Did the patient receive hemodialysis during this admission?'1                     | 0.0000    |
| ## 'Was the patient placed in a prone position during their admission?'1              | 0.0000    |
| ## 'COVID- Was hydroxychloroquine (Plaquenil) given during the patient's admission?'1 | 0.0000    |
| ## 'Age at Admission'                                                                 | 0.0000    |
| ## Per_Capita                                                                         | -43.9521  |
| ## 'SIRS RR'                                                                          | 0.0000    |
| ## SIRS_WBC                                                                           | 0.0000    |
| ## SIRS...110                                                                         | 0.0000    |
| ## 'Creatinine (if 0 = N/A)'                                                          | 0.0000    |
| ## 'Admission Date:'                                                                  | 62.5000   |
| ## 'Please specify: (choice=Diabetes)'1                                               | 0.0000    |
| ## 'SIRS TEMP'                                                                        | 0.0000    |
| ## 'Please specify: (choice=Chronic- Hepatitis C)'1                                   | 0.0000    |
| ##                                                                                    | eQQ Mean  |
| ## distance                                                                           | 71.5492   |
| ## 'Insurance Class'COMM                                                              | 0.0000    |
| ## 'Insurance Class'MEDICAID                                                          | 0.0000    |
| ## 'Insurance Class'MEDICARE                                                          | -50.0000  |
| ## 'Insurance Class'OTHER                                                             | 100.0000  |
| ## 'Insurance Class'SP                                                                | 0.0000    |
| ## 'Race:'American Indian/Alaskan Native                                              | -Inf      |
| ## 'Race:'Asian                                                                       | 100.0000  |
| ## 'Race:'Black                                                                       | 100.0000  |
| ## 'Race:'Native Hawaiian/Pacific Isle                                                | 100.0000  |
| ## 'Race:'Other                                                                       | -100.0000 |
| ## 'Race:'Unknown                                                                     | 40.0000   |
| ## 'Does the patient have a history of cancer?'1                                      | 50.0000   |
| ## 'Please specify: (choice=Hypertension)'1                                           | 100.0000  |
| ## 'Please specify: (choice=Coronary Artery Disease)'1                                | 75.0000   |
| ## 'Please specify: (choice=Congestive Heart Failure)'1                               | 33.3333   |
| ## 'Please specify: (choice=Asthma)'1                                                 | 33.3333   |
| ## 'Please specify: (choice=Chronic Obstructive Pulmonary Disease)'1                  | 66.6667   |
| ## 'Please specify: (choice=Chronic Renal Insufficiency)'1                            | 0.0000    |
| ## 'Please specify: (choice=Cirrhosis)'1                                              | -Inf      |
| ## 'Did the patient receive hemodialysis during this admission?'1                     | 59.0909   |
| ## 'Was the patient placed in a prone position during their admission?'1              | 82.7586   |
| ## 'COVID- Was hydroxychloroquine (Plaquenil) given during the patient's admission?'1 | 82.3529   |
| ## 'Age at Admission'                                                                 | 32.5472   |
| ## Per_Capita                                                                         | 43.7125   |
| ## 'SIRS RR'                                                                          | 100.0000  |
| ## SIRS_WBC                                                                           | 90.0000   |
| ## SIRS...110                                                                         | 68.2927   |
| ## 'Creatinine (if 0 = N/A)'                                                          | 11.8644   |
| ## 'Admission Date:'                                                                  | 42.9463   |
| ## 'Please specify: (choice=Diabetes)'1                                               | 66.6667   |
| ## 'SIRS TEMP'                                                                        | -Inf      |
| ## 'Please specify: (choice=Chronic- Hepatitis C)'1                                   | 100.0000  |

```

## eQQ Max
## distance 51.2306
## 'Insurance Class'COMM 0.0000
## 'Insurance Class'MEDICAID 0.0000
## 'Insurance Class'MEDICARE 0.0000
## 'Insurance Class'OTHER 100.0000
## 'Insurance Class'SP 0.0000
## 'Race:'American Indian/Alaskan Native -Inf
## 'Race:'Asian 100.0000
## 'Race:'Black 100.0000
## 'Race:'Native Hawaiian/Pacific Isle 100.0000
## 'Race:'Other 0.0000
## 'Race:'Unknown 0.0000
## 'Does the patient have a history of cancer?'1 0.0000
## 'Please specify: (choice=Hypertension)'1 100.0000
## 'Please specify: (choice=Coronary Artery Disease)'1 0.0000
## 'Please specify: (choice=Congestive Heart Failure)'1 0.0000
## 'Please specify: (choice=Asthma)'1 0.0000
## 'Please specify: (choice=Chronic Obstructive Pulmonary Disease)'1 0.0000
## 'Please specify: (choice=Chronic Renal Insufficiency)'1 0.0000
## 'Please specify: (choice=Cirrhosis)'1 -Inf
## 'Did the patient receive hemodialysis during this admission?'1 0.0000
## 'Was the patient placed in a prone position during their admission?'1 0.0000
## 'COVID- Was hydroxychloroquine (Plaquenil) given during the patient's admission?'1 0.0000
## 'Age at Admission' 60.8696
## Per_Capita 92.5998
## 'SIRS RR' 100.0000
## SIRS_WBC 0.0000
## SIRS...110 0.0000
## 'Creatinine (if 0 = N/A)' 45.4545
## 'Admission Date:' 0.0000
## 'Please specify: (choice=Diabetes)'1 0.0000
## 'SIRS TEMP' -Inf
## 'Please specify: (choice=Chronic- Hepatitis C)'1 100.0000
##
## Sample sizes:
## Control Treated
## All 887 105
## Matched 105 105
## Unmatched 782 0
## Discarded 0 0

```

```

matched.cohort.3 = get_matches(my.full.match.3, complete.df.minus.labs, id_cols = NULL, newdata = NULL)

```

```

## just need dems for matched.cohort

```

```

row.names(no.labs.dems.na) <- 1:nrow(no.labs.dems.na) # sample size: 984

```

```

my.full.match.3.dem = matchit('Was plasma given to the patient during this admission?' ~ 'Insurance Cl

```

```

## Warning in model.matrix.default(tt, data = mf): the response appeared on the
## right-hand side and was dropped

```

```

## Warning in model.matrix.default(tt, data = mf): problem with term 12 in
## model.matrix: no columns are assigned

```

```
## Warning in model.matrix.default(mt, mf, contrasts): the response appeared on the
## right-hand side and was dropped
```

```
## Warning in model.matrix.default(mt, mf, contrasts): problem with term 12 in
## model.matrix: no columns are assigned
```

```
matched.cohort.3.dem = get_matches(my.full.match.3.dem, no.labs.dems.na, id_cols = NULL, newdata = NULL,
# is there any difference between the groups
binary.variables.3 = matched.cohort.3 %>%
  dplyr::select(Was.plasma.given.to.the.patient.during.this.admission., Does.the.patient.have.a.history)

chi.p.exit.3 = vector()
chi.variable.name.3 = vector()

for ( i in c(2:8,9, 10:16)) {
  variable.1 = binary.variables.3[[i]][binary.variables.3$Was.plasma.given.to.the.patient.during.this.admission.]
  variable.0 = binary.variables.3[[i]][binary.variables.3$Does.the.patient.have.a.history]
  chisquare.test = chisq.test(variable.1, variable.0)
  chisquare.test.p.value = chisquare.test$p.value
  chi.p.exit.3[i] = chisquare.test.p.value
  chi.variable.name.3[i] = colnames(binary.variables.3)[i]
}
```

```
## Warning in chisq.test(variable.1, variable.0): Chi-squared approximation may be
## incorrect
```

```
## Warning in chisq.test(variable.1, variable.0): Chi-squared approximation may be
## incorrect
```

```
## Warning in chisq.test(variable.1, variable.0): Chi-squared approximation may be
## incorrect
```

```
## Warning in chisq.test(variable.1, variable.0): Chi-squared approximation may be
## incorrect
```

```
## Warning in chisq.test(variable.1, variable.0): Chi-squared approximation may be
## incorrect
```

```
## Warning in chisq.test(variable.1, variable.0): Chi-squared approximation may be
## incorrect
```

```
## Warning in chisq.test(variable.1, variable.0): Chi-squared approximation may be
## incorrect
```

```
## Warning in chisq.test(variable.1, variable.0): Chi-squared approximation may be
## incorrect
```

```
## Warning in chisq.test(variable.1, variable.0): Chi-squared approximation may be
## incorrect
```

```
## Warning in chisq.test(variable.1, variable.0): Chi-squared approximation may be
## incorrect
```

```
## Warning in chisq.test(variable.1, variable.0): Chi-squared approximation may be
## incorrect
```

```
chi.df.3 = data.frame(chi.variable.name.3, chi.p.exit.3) # insurance class significantly different
```

```
numerical.variables.3 = matched.cohort.3 %>%
```

```
  dplyr::select(Was.plasma.given.to.the.patient.during.this.admission., Age.at.Admission, Per_Capita, )
```

```
p.value.exit.3 = vector()
```

```
variable.name.exit.3 = vector()
```

```
for ( i in c(2:7, 9:ncol(numerical.variables.3)) ) { # first column is plasma # skip date
```

```
  variable.1 = numerical.variables.3[[i]][numerical.variables.3$Was.plasma.given.to.the.patient.during.
```

```
  variable.0 = numerical.variables.3[[i]][numerical.variables.3$Was.plasma.given.to.the.patient.during.
```

```
  middle.t.test = t.test(variable.1, variable.0)
```

```
  t.test.p.value = middle.t.test$p.value
```

```
  p.value.exit.3[i] = t.test.p.value
```

```
  variable.name.exit.3[i] = colnames(numerical.variables.3)[i]
```

```
}
```

```
t.test.df.3 = data.frame(variable.name.exit.3, p.value.exit.3) ## none sig different
```

```
## no significant differences
```

```
match.3.glm = glm(death ~ Was.plasma.given.to.the.patient.during.this.admission., data = matched.cohort
```

```
match.3.summary = summary(match.3.glm) # p =0.03744
```

```
match.3.conf.intervals = exp(cbind(coef(match.3.glm), confint(match.3.glm))) # 1.7970648 ci 1.0377565
```

```
## Waiting for profiling to be done...
```

```
# mortality in 3 days
```

```
## changing it mortality in 4 days to increase the number of deaths
```

```
## dying in 4 days is still quick clinically
```

```
death.3.days = relevant.columns %>%
```

```
  filter(Length_of_Stay <= 4 & death == 1)
```

```
death.3.days$quick.death = 1
```

```
alive.3.days = relevant.columns %>%
```

```
  filter(Length_of_Stay > 4 | death == 0)
```

```
alive.3.days$quick.death = 0
```

```
quick.death.df = rbind(death.3.days, alive.3.days)
```

```
exit.df.3 = data.frame()
```

```
for ( i in 3:ncol(quick.death.df) ){ # first column is just redcap number and second is always first vis
```

```
  middle = quick.death.df
```

```
  variable.selected = middle[[i]]
```

```
  middle.glm = glm(middle$quick.death~ variable.selected, family = binomial)
```

```
  middle.glm.summary = summary(middle.glm)
```

```
  middle.glm.summary.df = data.frame(middle.glm.summary$coefficients)
```

```
  middle.glm.summary.df = middle.glm.summary.df[-1,] # delete intercept row
```

```

column.name.selected = colnames(middle)[i]
if (nrow(middle.glm.summary.df) == 1){
  row.names(middle.glm.summary.df) = paste(column.name.selected)
}

exit.df.3 = rbind(exit.df.3, middle.glm.summary.df)
# print(colnames(middle)[i])
# print(summary(middle.glm))
}

```

```
## Warning: glm.fit: algorithm did not converge
```

```

quick.death.p.less.0.25 = exit.df.3[exit.df.3$Pr...z.. < 0.25,]
# removing nitric oxide due to lack of clinical interest and small sample size

# MODEL #
quick.death.variables.selected = quick.death.df %>%
  dplyr::select('Patient Sex:', 'Insurance Class', 'Please specify: (choice=Hypertension)', 'Please specify: (choice=Coronary Artery Disease)', 'Please specify: (choice=Congestive Heart Failure)', 'Please specify: (choice=Chronic Obstructive Pulmonary Disease)', 'Please specify: (choice=Chronic Renal Insufficiency)', 'Please specify: (choice=Cirrhosis)', 'Does the patient have a history of metabolic disease?', 'Please specify: (choice=Diabetes)', 'Was plasma given to the patient during this admission?', 'COVID- Was hydroxychloroquine (Plaquenil) given during the patient's admission?', 'Age at Admission', 'Patient BMI', 'SIRS RR', 'SIRS_WBC', 'SIRS...110')
quick.death.variables.selected.na = na.omit(quick.death.variables.selected) # 496 pts

# df for dems
quick.dems = quick.death.df %>%
  dplyr::select('REDCap Record ID', 'Patient Sex:', 'Insurance Class', 'Please specify: (choice=Hypertension)', 'Please specify: (choice=Coronary Artery Disease)', 'Please specify: (choice=Congestive Heart Failure)', 'Please specify: (choice=Chronic Obstructive Pulmonary Disease)', 'Please specify: (choice=Chronic Renal Insufficiency)', 'Please specify: (choice=Cirrhosis)', 'Does the patient have a history of metabolic disease?', 'Please specify: (choice=Diabetes)', 'Was plasma given to the patient during this admission?', 'COVID- Was hydroxychloroquine (Plaquenil) given during the patient's admission?', 'Age at Admission', 'Patient BMI', 'SIRS RR', 'SIRS_WBC', 'SIRS...110')
quick.dems.na = na.omit(quick.dems)

#MODEL 2A
quick.death.glm = glm(quick.death ~ ., family = binomial, data = quick.death.variables.selected.na)
quick.death.summary = summary(quick.death.glm)
length(quick.death.glm$residuals) #sample size is 496

```

```
## [1] 496
```

```
car::vif(quick.death.glm)
```

```

##
## 'Patient Sex:' 1.270814
## 'Insurance Class' 2.230879
## 'Please specify: (choice=Hypertension)' 1.282939
## 'Please specify: (choice=Coronary Artery Disease)' 1.424558
## 'Please specify: (choice=Congestive Heart Failure)' 1.477491
## 'Please specify: (choice=Chronic Obstructive Pulmonary Disease)' 1.158470
## 'Please specify: (choice=Chronic Renal Insufficiency)' 1.375085
## 'Please specify: (choice=Cirrhosis)' 1.000000
## 'Does the patient have a history of metabolic disease?' 3.858944
## 'Please specify: (choice=Diabetes)' 3.752277
## 'Was plasma given to the patient during this admission?' 1.087457
## 'COVID- Was hydroxychloroquine (Plaquenil) given during the patient's admission?' 1.205630
## 'Age at Admission' 2.183664
## 'Patient BMI' 1.360653
## 'SIRS RR' 1.616308
## SIRS_WBC 1.402419
## SIRS...110 1.967505

```

```

## 'Creatinine (if 0 = N/A)' 4.146063
## CRP 1.265745
## 'D-Domer' 1.176228
## 'Please specify: (choice=End Stage Renal Failure)' 4.373899
## Df
## 'Patient Sex:' 1
## 'Insurance Class' 3
## 'Please specify: (choice=Hypertension)' 1
## 'Please specify: (choice=Coronary Artery Disease)' 1
## 'Please specify: (choice=Congestive Heart Failure)' 1
## 'Please specify: (choice=Chronic Obstructive Pulmonary Disease)' 1
## 'Please specify: (choice=Chronic Renal Insufficiency)' 1
## 'Please specify: (choice=Cirrhosis)' 1
## 'Does the patient have a history of metabolic disease?' 1
## 'Please specify: (choice=Diabetes)' 1
## 'Was plasma given to the patient during this admission?' 1
## 'COVID- Was hydroxychloroquine (Plaquenil) given during the patient's admission?' 1
## 'Age at Admission' 1
## 'Patient BMI' 1
## 'SIRS RR' 1
## SIRS_WBC 1
## SIRS...110 1
## 'Creatinine (if 0 = N/A)' 1
## CRP 1
## 'D-Domer' 1
## 'Please specify: (choice=End Stage Renal Failure)' 1
## GVIF^(1/(2*Df))
## 'Patient Sex:' 1.127304
## 'Insurance Class' 1.143087
## 'Please specify: (choice=Hypertension)' 1.132669
## 'Please specify: (choice=Coronary Artery Disease)' 1.193548
## 'Please specify: (choice=Congestive Heart Failure)' 1.215521
## 'Please specify: (choice=Chronic Obstructive Pulmonary Disease)' 1.076322
## 'Please specify: (choice=Chronic Renal Insufficiency)' 1.172640
## 'Please specify: (choice=Cirrhosis)' 1.000000
## 'Does the patient have a history of metabolic disease?' 1.964420
## 'Please specify: (choice=Diabetes)' 1.937080
## 'Was plasma given to the patient during this admission?' 1.042812
## 'COVID- Was hydroxychloroquine (Plaquenil) given during the patient's admission?' 1.098012
## 'Age at Admission' 1.477722
## 'Patient BMI' 1.166470
## 'SIRS RR' 1.271341
## SIRS_WBC 1.184238
## SIRS...110 1.402678
## 'Creatinine (if 0 = N/A)' 2.036188
## CRP 1.125053
## 'D-Domer' 1.084541
## 'Please specify: (choice=End Stage Renal Failure)' 2.091387

```

```

quick.death.summary.p.values = quick.death.summary$coefficients[,4]
quick.death.conf.intervals = exp(cbind(coef(quick.death.glm), confint(quick.death.glm)))

```

```

## Waiting for profiling to be done...

```













```

## Warning: glm.fit: fitted probabilities numerically 0 or 1 occurred
## Warning: glm.fit: fitted probabilities numerically 0 or 1 occurred
## Warning: glm.fit: fitted probabilities numerically 0 or 1 occurred
## Warning: glm.fit: fitted probabilities numerically 0 or 1 occurred
## Warning: glm.fit: fitted probabilities numerically 0 or 1 occurred
## Warning: glm.fit: fitted probabilities numerically 0 or 1 occurred
## Warning: glm.fit: fitted probabilities numerically 0 or 1 occurred
## Warning: glm.fit: fitted probabilities numerically 0 or 1 occurred
## Warning: glm.fit: fitted probabilities numerically 0 or 1 occurred
## Warning: glm.fit: fitted probabilities numerically 0 or 1 occurred
## Warning: glm.fit: fitted probabilities numerically 0 or 1 occurred
## Warning: glm.fit: fitted probabilities numerically 0 or 1 occurred
## Warning: glm.fit: fitted probabilities numerically 0 or 1 occurred
## Warning: glm.fit: fitted probabilities numerically 0 or 1 occurred
## Warning: glm.fit: fitted probabilities numerically 0 or 1 occurred
## Warning: glm.fit: fitted probabilities numerically 0 or 1 occurred
## Warning: glm.fit: fitted probabilities numerically 0 or 1 occurred
## Warning: glm.fit: fitted probabilities numerically 0 or 1 occurred
## Warning: glm.fit: fitted probabilities numerically 0 or 1 occurred
## Warning: glm.fit: fitted probabilities numerically 0 or 1 occurred
## Warning: glm.fit: fitted probabilities numerically 0 or 1 occurred
## Warning: glm.fit: fitted probabilities numerically 0 or 1 occurred
## Warning: glm.fit: fitted probabilities numerically 0 or 1 occurred
## Warning: glm.fit: fitted probabilities numerically 0 or 1 occurred
## Warning: glm.fit: fitted probabilities numerically 0 or 1 occurred
## Warning: glm.fit: fitted probabilities numerically 0 or 1 occurred
## Warning: glm.fit: fitted probabilities numerically 0 or 1 occurred
## Warning: glm.fit: fitted probabilities numerically 0 or 1 occurred
## Warning: glm.fit: fitted probabilities numerically 0 or 1 occurred
## Warning: glm.fit: fitted probabilities numerically 0 or 1 occurred
## Warning: glm.fit: fitted probabilities numerically 0 or 1 occurred
## Warning: glm.fit: fitted probabilities numerically 0 or 1 occurred
## Warning: glm.fit: fitted probabilities numerically 0 or 1 occurred
## Warning: glm.fit: fitted probabilities numerically 0 or 1 occurred
## Warning: glm.fit: fitted probabilities numerically 0 or 1 occurred
## Warning: glm.fit: fitted probabilities numerically 0 or 1 occurred
## Warning: glm.fit: fitted probabilities numerically 0 or 1 occurred
## Warning in regularize.values(x, y, ties, missing(ties), na.rm = na.rm):
## collapsing to unique 'x' values
quick.death.conf.intervals.df = data.frame(quick.death.conf.intervals)
quick.death.conf.intervals.df$p.values = quick.death.summary.p.values
logitgof(quick.death.variables.selected.na$quick.death, fitted(quick.death.glm), g = 10) #p = 0.2705

## Warning in logitgof(quick.death.variables.selected.na$quick.death,
## fitted(quick.death.glm), : At least one cell in the expected frequencies table
## is < 1. Chi-square approximation may be incorrect.

##

```

```

## Hosmer and Lemeshow test (binary model)
##
## data: quick.death.variables.selected.na$quick.death, fitted(quick.death.glm)
## X-squared = 9.9232, df = 8, p-value = 0.2705

quick.death.variables.selected.no.labs = quick.death.df %>%
  dplyr::select('Patient Sex:', 'Insurance Class', 'Please specify: (choice=Hypertension)', 'Please spe

quick.death.df.na = na.omit(quick.death.variables.selected.no.labs) # 1084 people
table(quick.death.df.na$quick.death) ## 64 people died in 4 days

##
##    0    1
## 1020  64

# MODEL 2B
quick.death.variables.selected.crp = quick.death.df %>%
  dplyr::select('Patient Sex:', 'Insurance Class', 'Please specify: (choice=Hypertension)', 'Please spe

quick.death.variables.selected.crp.dem = quick.death.df %>%
  dplyr::select('REDCap Record ID', 'Patient Sex:', 'Insurance Class', 'Please specify: (choice=Hyperte
quick.death.variables.selected.crp.dem.na = na.omit(quick.death.variables.selected.crp.dem)

quick.death.variables.selected.crp.na = na.omit(quick.death.variables.selected.crp) #650 people
table(quick.death.variables.selected.crp.na$quick.death) ## 19 died out of 650

##
##    0    1
## 631  19

## model 2b
quick.death.just.crp.glm = glm(quick.death ~ ., family = binomial, data = quick.death.variables.selected

## Warning: glm.fit: fitted probabilities numerically 0 or 1 occurred

quick.death.just.crp.summary = summary(quick.death.just.crp.glm)
length(quick.death.just.crp.glm$residuals) #sample size is 650

## [1] 650

quick.death.just.crp.summary.p.values = quick.death.just.crp.summary$coefficients[,4]
quick.death.just.crp.conf.intervals = exp(cbind(coef(quick.death.just.crp.glm), confint(quick.death.jus

## Waiting for profiling to be done...

## Warning: glm.fit: fitted probabilities numerically 0 or 1 occurred

```





















```
## Warning: glm.fit: fitted probabilities numerically 0 or 1 occurred
## Warning: glm.fit: fitted probabilities numerically 0 or 1 occurred
## Warning: glm.fit: fitted probabilities numerically 0 or 1 occurred
## Warning: glm.fit: fitted probabilities numerically 0 or 1 occurred
## Warning: glm.fit: fitted probabilities numerically 0 or 1 occurred
## Warning: glm.fit: fitted probabilities numerically 0 or 1 occurred
```

```
quick.death.just.crp.conf.intervals.df = data.frame(quick.death.just.crp.conf.intervals)
quick.death.just.crp.conf.intervals.df$p.values = quick.death.just.crp.summary.p.values
car::vif(quick.death.just.crp.glm)
```

```
##
##                                     GVIF
## 'Patient Sex:'                      1.255696
## 'Insurance Class'                   2.102303
## 'Please specify: (choice=Hypertension)‘ 1.235363
## 'Please specify: (choice=Coronary Artery Disease)‘ 1.337077
## 'Please specify: (choice=Congestive Heart Failure)‘ 1.254696
## 'Please specify: (choice=Chronic Obstructive Pulmonary Disease)‘ 1.180778
## 'Please specify: (choice=Chronic Renal Insufficiency)‘ 1.335314
## 'Please specify: (choice=Cirrhosis)‘ 1.000000
## 'Does the patient have a history of metabolic disease?‘ 3.180585
## 'Please specify: (choice=Diabetes)‘ 3.065003
## 'Was plasma given to the patient during this admission?‘ 1.134984
## 'COVID- Was hydroxychloroquine (Plaquenil) given during the patient’s admission?‘ 1.142668
## 'Age at Admission‘ 2.335976
## 'Patient BMI‘ 1.313999
## 'SIRS RR‘ 1.458493
## SIRS_WBC 1.254228
## SIRS...110 1.687018
## CRP 1.186419
## 'Please specify: (choice=End Stage Renal Failure)‘ 1.242134
##                                     Df
## 'Patient Sex:' 1
## 'Insurance Class' 3
## 'Please specify: (choice=Hypertension)‘ 1
## 'Please specify: (choice=Coronary Artery Disease)‘ 1
## 'Please specify: (choice=Congestive Heart Failure)‘ 1
## 'Please specify: (choice=Chronic Obstructive Pulmonary Disease)‘ 1
## 'Please specify: (choice=Chronic Renal Insufficiency)‘ 1
## 'Please specify: (choice=Cirrhosis)‘ 1
## 'Does the patient have a history of metabolic disease?‘ 1
## 'Please specify: (choice=Diabetes)‘ 1
## 'Was plasma given to the patient during this admission?‘ 1
## 'COVID- Was hydroxychloroquine (Plaquenil) given during the patient’s admission?‘ 1
## 'Age at Admission‘ 1
## 'Patient BMI‘ 1
## 'SIRS RR‘ 1
## SIRS_WBC 1
## SIRS...110 1
```



```

## CRP 1
## 'Please specify: (choice=End Stage Renal Failure)' 1
## GVIF^(1/(2*Df))
## 'Patient Sex:' 1.120578
## 'Insurance Class' 1.131834
## 'Please specify: (choice=Hypertension)' 1.111469
## 'Please specify: (choice=Coronary Artery Disease)' 1.156321
## 'Please specify: (choice=Congestive Heart Failure)' 1.120132
## 'Please specify: (choice=Chronic Obstructive Pulmonary Disease)' 1.086636
## 'Please specify: (choice=Chronic Renal Insufficiency)' 1.155558
## 'Please specify: (choice=Cirrhosis)' 1.000000
## 'Does the patient have a history of metabolic disease?' 1.783419
## 'Please specify: (choice=Diabetes)' 1.750715
## 'Was plasma given to the patient during this admission?' 1.065356
## 'COVID- Was hydroxychloroquine (Plaquenil) given during the patient's admission?' 1.068956
## 'Age at Admission' 1.528390
## 'Patient BMI' 1.146298
## 'SIRS RR' 1.207681
## SIRS_WBC 1.119923
## SIRS...110 1.298853
## CRP 1.089228
## 'Please specify: (choice=End Stage Renal Failure)' 1.114511

```

```
logitgof(quick.death.variables.selected.crp.na$quick.death, fitted(quick.death.just.crp.glm), g = 10) #
```

```

## Warning in logitgof(quick.death.variables.selected.crp.na$quick.death,
## fitted(quick.death.just.crp.glm), : At least one cell in the expected
## frequencies table is < 1. Chi-square approximation may be incorrect.

```

```

##
## Hosmer and Lemeshow test (binary model)
##
## data: quick.death.variables.selected.crp.na$quick.death, fitted(quick.death.just.crp.glm)
## X-squared = 11.468, df = 8, p-value = 0.1766

```

```

## is there any difference in mortality those that received hydroxychloroquine
hcq.data = relevant.columns
hcq.simple.glm = glm(death ~ 'COVID- Was hydroxychloroquine (Plaquenil) given during the patient's admi
hcq.simple.summary = summary(hcq.simple.glm) #p = 7.37e-11
hcq.simple.conf.intervals = exp(cbind(coef(hcq.simple.glm), confint(hcq.simple.glm))) # OR 2.6442308 1..

```

```
## Waiting for profiling to be done...
```

```

hcq.select = hcq.data %>%
  dplyr::select('REDCap Record ID', 'Insurance Class', 'Race:', 'Does the patient have a history of can

hcq.select.na = na.omit(hcq.select)

hcq.select.no.labs = subset(hcq.select, select = - c(Ferritin, CRP, 'D-Domer'))
hcq.select.no.labs.na = na.omit(hcq.select.no.labs)

```

```
row.names(hcq.select.na) <- 1:nrow(hcq.select.na)
```

```
my.hcq.match = matchit('COVID- Was hydroxychloroquine (Plaquenil) given during the patient's admission?' +  
summary(my.hcq.match))
```

```
##
```

```
## Call:
```

```
## matchit(formula = 'COVID- Was hydroxychloroquine (Plaquenil) given during the patient's admission?' +  
##   'Insurance Class' + 'Race:' + 'Does the patient have a history of cancer?' +  
##   'Please specify: (choice=Hypertension)' + 'Please specify: (choice=Coronary Artery Disease)' +  
##   'Please specify: (choice=Congestive Heart Failure)' +  
##   'Please specify: (choice=Asthma)' + 'Please specify: (choice=Chronic Obstructive Pulmonary D' +  
##   'Please specify: (choice=Chronic Renal Insufficiency)' +  
##   'Please specify: (choice=Cirrhosis)' + 'Did the patient receive hemodialysis during this adm' +  
##   'Was plasma given to the patient during this admission?' +  
##   'Was the patient placed in a prone position during their admission?' +  
##   'Was plasma given to the patient during this admission?' +  
##   'Age at Admission' + Per_Capita + 'SIRS RR' + SIRS_WBC +  
##   SIRS...110 + 'Creatinine (if 0 = N/A)' + Ferritin + CRP +  
##   'D-Domer' + 'Admission Date:' + 'Please specify: (choice=Diabetes)' +  
##   'SIRS TEMP' + 'Please specify: (choice=Chronic- Hepatitis C)',  
##   data = hcq.select.na, method = "nearest")
```

```
##
```

```
## Summary of balance for all data:
```

|                                                                          | Means Treated |
|--------------------------------------------------------------------------|---------------|
| ## distance                                                              | 0.6041        |
| ## 'Insurance Class'COMM                                                 | 0.3212        |
| ## 'Insurance Class'MEDICAID                                             | 0.2482        |
| ## 'Insurance Class'MEDICARE                                             | 0.4161        |
| ## 'Insurance Class'OTHER                                                | 0.0000        |
| ## 'Insurance Class'SP                                                   | 0.0146        |
| ## 'Race:'American Indian/Alaskan Native                                 | 0.0000        |
| ## 'Race:'Asian                                                          | 0.0219        |
| ## 'Race:'Black                                                          | 0.2044        |
| ## 'Race:'Native Hawaiian/Pacific Isle                                   | 0.0000        |
| ## 'Race:'Other                                                          | 0.0730        |
| ## 'Race:'Unknown                                                        | 0.1460        |
| ## 'Does the patient have a history of cancer?'1                         | 0.1241        |
| ## 'Please specify: (choice=Hypertension)'1                              | 0.5985        |
| ## 'Please specify: (choice=Coronary Artery Disease)'1                   | 0.1241        |
| ## 'Please specify: (choice=Congestive Heart Failure)'1                  | 0.0219        |
| ## 'Please specify: (choice=Asthma)'1                                    | 0.0584        |
| ## 'Please specify: (choice=Chronic Obstructive Pulmonary Disease)'1     | 0.0584        |
| ## 'Please specify: (choice=Chronic Renal Insufficiency)'1               | 0.0657        |
| ## 'Please specify: (choice=Cirrhosis)'1                                 | 0.0000        |
| ## 'Did the patient receive hemodialysis during this admission?'1        | 0.1095        |
| ## 'Was plasma given to the patient during this admission?'1             | 0.2044        |
| ## 'Was the patient placed in a prone position during their admission?'1 | 0.3504        |
| ## 'Age at Admission'                                                    | 63.5693       |
| ## Per_Capita                                                            | 48386.9197    |
| ## 'SIRS RR'                                                             | 0.8029        |
| ## SIRS_WBC                                                              | 0.1679        |
| ## SIRS...110                                                            | 1.9270        |

|                                                                          |               |
|--------------------------------------------------------------------------|---------------|
| ## 'Creatinine (if 0 = N/A)'                                             | 1.1861        |
| ## Ferritin                                                              | 764.9416      |
| ## CRP                                                                   | 151.0547      |
| ## 'D-Dimer'                                                             | 6769.0803     |
| ## 'Admission Date:'                                                     | 18358.5985    |
| ## 'Please specify: (choice=Diabetes)'1                                  | 0.3869        |
| ## 'SIRS TEMP'                                                           | 0.2920        |
| ## 'Please specify: (choice=Chronic- Hepatitis C)'1                      | 0.0073        |
| ##                                                                       | Means Control |
| ## distance                                                              | 0.2840        |
| ## 'Insurance Class'COMM                                                 | 0.2461        |
| ## 'Insurance Class'MEDICAID                                             | 0.2094        |
| ## 'Insurance Class'MEDICARE                                             | 0.5340        |
| ## 'Insurance Class'OTHER                                                | 0.0000        |
| ## 'Insurance Class'SP                                                   | 0.0105        |
| ## 'Race:'American Indian/Alaskan Native                                 | 0.0105        |
| ## 'Race:'Asian                                                          | 0.0105        |
| ## 'Race:'Black                                                          | 0.1832        |
| ## 'Race:'Native Hawaiian/Pacific Isle                                   | 0.0000        |
| ## 'Race:'Other                                                          | 0.0471        |
| ## 'Race:'Unknown                                                        | 0.2042        |
| ## 'Does the patient have a history of cancer?'1                         | 0.1675        |
| ## 'Please specify: (choice=Hypertension)'1                              | 0.5236        |
| ## 'Please specify: (choice=Coronary Artery Disease)'1                   | 0.1047        |
| ## 'Please specify: (choice=Congestive Heart Failure)'1                  | 0.0262        |
| ## 'Please specify: (choice=Asthma)'1                                    | 0.0890        |
| ## 'Please specify: (choice=Chronic Obstructive Pulmonary Disease)'1     | 0.0524        |
| ## 'Please specify: (choice=Chronic Renal Insufficiency)'1               | 0.0576        |
| ## 'Please specify: (choice=Cirrhosis)'1                                 | 0.0105        |
| ## 'Did the patient receive hemodialysis during this admission?'1        | 0.0471        |
| ## 'Was plasma given to the patient during this admission?'1             | 0.1728        |
| ## 'Was the patient placed in a prone position during their admission?'1 | 0.1571        |
| ## 'Age at Admission'                                                    | 67.3979       |
| ## Per_Capita                                                            | 50165.6859    |
| ## 'SIRS RR'                                                             | 0.7120        |
| ## SIRS_WBC                                                              | 0.2618        |
| ## SIRS...110                                                            | 1.7853        |
| ## 'Creatinine (if 0 = N/A)'                                             | 1.1021        |
| ## Ferritin                                                              | 1168.3963     |
| ## CRP                                                                   | 121.2670      |
| ## 'D-Dimer'                                                             | 4762.2565     |
| ## 'Admission Date:'                                                     | 18371.2251    |
| ## 'Please specify: (choice=Diabetes)'1                                  | 0.3089        |
| ## 'SIRS TEMP'                                                           | 0.2094        |
| ## 'Please specify: (choice=Chronic- Hepatitis C)'1                      | 0.0052        |
| ##                                                                       | SD Control    |
| ## distance                                                              | 0.2412        |
| ## 'Insurance Class'COMM                                                 | 0.4319        |
| ## 'Insurance Class'MEDICAID                                             | 0.4080        |
| ## 'Insurance Class'MEDICARE                                             | 0.5002        |
| ## 'Insurance Class'OTHER                                                | 0.0000        |
| ## 'Insurance Class'SP                                                   | 0.1021        |
| ## 'Race:'American Indian/Alaskan Native                                 | 0.1021        |
| ## 'Race:'Asian                                                          | 0.1021        |

|                                                                          |            |
|--------------------------------------------------------------------------|------------|
| ## 'Race:'Black                                                          | 0.3879     |
| ## 'Race:'Native Hawaiian/Pacific Isle                                   | 0.0000     |
| ## 'Race:'Other                                                          | 0.2125     |
| ## 'Race:'Unknown                                                        | 0.4042     |
| ## 'Does the patient have a history of cancer?'1                         | 0.3744     |
| ## 'Please specify: (choice=Hypertension)'1                              | 0.5008     |
| ## 'Please specify: (choice=Coronary Artery Disease)'1                   | 0.3070     |
| ## 'Please specify: (choice=Congestive Heart Failure)'1                  | 0.1601     |
| ## 'Please specify: (choice=Asthma)'1                                    | 0.2855     |
| ## 'Please specify: (choice=Chronic Obstructive Pulmonary Disease)'1     | 0.2233     |
| ## 'Please specify: (choice=Chronic Renal Insufficiency)'1               | 0.2336     |
| ## 'Please specify: (choice=Cirrhosis)'1                                 | 0.1021     |
| ## 'Did the patient receive hemodialysis during this admission?'1        | 0.2125     |
| ## 'Was plasma given to the patient during this admission?'1             | 0.3790     |
| ## 'Was the patient placed in a prone position during their admission?'1 | 0.3648     |
| ## 'Age at Admission'                                                    | 17.2876    |
| ## Per_Capita                                                            | 21893.1784 |
| ## 'SIRS RR'                                                             | 0.4540     |
| ## SIRS_WBC                                                              | 0.4408     |
| ## SIRS...110                                                            | 0.9793     |
| ## 'Creatinine (if 0 = N/A)'                                             | 0.9945     |
| ## Ferritin                                                              | 7905.9423  |
| ## CRP                                                                   | 93.6599    |
| ## 'D-Domer'                                                             | 11930.6583 |
| ## 'Admission Date:'                                                     | 14.8007    |
| ## 'Please specify: (choice=Diabetes)'1                                  | 0.4633     |
| ## 'SIRS TEMP'                                                           | 0.4080     |
| ## 'Please specify: (choice=Chronic- Hepatitis C)'1                      | 0.0724     |
| ##                                                                       | Mean Diff  |
| ## distance                                                              | 0.3202     |
| ## 'Insurance Class'COMM                                                 | 0.0751     |
| ## 'Insurance Class'MEDICAID                                             | 0.0388     |
| ## 'Insurance Class'MEDICARE                                             | -0.1180    |
| ## 'Insurance Class'OTHER                                                | 0.0000     |
| ## 'Insurance Class'SP                                                   | 0.0041     |
| ## 'Race:'American Indian/Alaskan Native                                 | -0.0105    |
| ## 'Race:'Asian                                                          | 0.0114     |
| ## 'Race:'Black                                                          | 0.0211     |
| ## 'Race:'Native Hawaiian/Pacific Isle                                   | 0.0000     |
| ## 'Race:'Other                                                          | 0.0259     |
| ## 'Race:'Unknown                                                        | -0.0582    |
| ## 'Does the patient have a history of cancer?'1                         | -0.0435    |
| ## 'Please specify: (choice=Hypertension)'1                              | 0.0750     |
| ## 'Please specify: (choice=Coronary Artery Disease)'1                   | 0.0194     |
| ## 'Please specify: (choice=Congestive Heart Failure)'1                  | -0.0043    |
| ## 'Please specify: (choice=Asthma)'1                                    | -0.0306    |
| ## 'Please specify: (choice=Chronic Obstructive Pulmonary Disease)'1     | 0.0060     |
| ## 'Please specify: (choice=Chronic Renal Insufficiency)'1               | 0.0081     |
| ## 'Please specify: (choice=Cirrhosis)'1                                 | -0.0105    |
| ## 'Did the patient receive hemodialysis during this admission?'1        | 0.0624     |
| ## 'Was plasma given to the patient during this admission?'1             | 0.0316     |
| ## 'Was the patient placed in a prone position during their admission?'1 | 0.1933     |
| ## 'Age at Admission'                                                    | -3.8286    |
| ## Per_Capita                                                            | -1778.7662 |

|                                                                          |           |
|--------------------------------------------------------------------------|-----------|
| ## 'SIRS RR'                                                             | 0.0909    |
| ## SIRS_WBC                                                              | -0.0939   |
| ## SIRS...110                                                            | 0.1417    |
| ## 'Creatinine (if 0 = N/A)'                                             | 0.0840    |
| ## Ferritin                                                              | -403.4547 |
| ## CRP                                                                   | 29.7877   |
| ## 'D-Domer'                                                             | 2006.8237 |
| ## 'Admission Date:'                                                     | -12.6266  |
| ## 'Please specify: (choice=Diabetes)'1                                  | 0.0780    |
| ## 'SIRS TEMP'                                                           | 0.0825    |
| ## 'Please specify: (choice=Chronic- Hepatitis C)'1                      | 0.0021    |
| ##                                                                       | eQQ Med   |
| ## distance                                                              | 0.3509    |
| ## 'Insurance Class'COMM                                                 | 0.0000    |
| ## 'Insurance Class'MEDICAID                                             | 0.0000    |
| ## 'Insurance Class'MEDICARE                                             | 0.0000    |
| ## 'Insurance Class'OTHER                                                | 0.0000    |
| ## 'Insurance Class'SP                                                   | 0.0000    |
| ## 'Race:'American Indian/Alaskan Native                                 | 0.0000    |
| ## 'Race:'Asian                                                          | 0.0000    |
| ## 'Race:'Black                                                          | 0.0000    |
| ## 'Race:'Native Hawaiian/Pacific Isle                                   | 0.0000    |
| ## 'Race:'Other                                                          | 0.0000    |
| ## 'Race:'Unknown                                                        | 0.0000    |
| ## 'Does the patient have a history of cancer?'1                         | 0.0000    |
| ## 'Please specify: (choice=Hypertension)'1                              | 0.0000    |
| ## 'Please specify: (choice=Coronary Artery Disease)'1                   | 0.0000    |
| ## 'Please specify: (choice=Congestive Heart Failure)'1                  | 0.0000    |
| ## 'Please specify: (choice=Asthma)'1                                    | 0.0000    |
| ## 'Please specify: (choice=Chronic Obstructive Pulmonary Disease)'1     | 0.0000    |
| ## 'Please specify: (choice=Chronic Renal Insufficiency)'1               | 0.0000    |
| ## 'Please specify: (choice=Cirrhosis)'1                                 | 0.0000    |
| ## 'Did the patient receive hemodialysis during this admission?'1        | 0.0000    |
| ## 'Was plasma given to the patient during this admission?'1             | 0.0000    |
| ## 'Was the patient placed in a prone position during their admission?'1 | 0.0000    |
| ## 'Age at Admission'                                                    | 4.0000    |
| ## Per_Capita                                                            | 1736.0000 |
| ## 'SIRS RR'                                                             | 0.0000    |
| ## SIRS_WBC                                                              | 0.0000    |
| ## SIRS...110                                                            | 0.0000    |
| ## 'Creatinine (if 0 = N/A)'                                             | 0.1000    |
| ## Ferritin                                                              | 164.0000  |
| ## CRP                                                                   | 36.7000   |
| ## 'D-Domer'                                                             | 148.0000  |
| ## 'Admission Date:'                                                     | 13.0000   |
| ## 'Please specify: (choice=Diabetes)'1                                  | 0.0000    |
| ## 'SIRS TEMP'                                                           | 0.0000    |
| ## 'Please specify: (choice=Chronic- Hepatitis C)'1                      | 0.0000    |
| ##                                                                       | eQQ Mean  |
| ## distance                                                              | 0.3221    |
| ## 'Insurance Class'COMM                                                 | 0.0803    |
| ## 'Insurance Class'MEDICAID                                             | 0.0438    |
| ## 'Insurance Class'MEDICARE                                             | 0.1168    |
| ## 'Insurance Class'OTHER                                                | 0.0000    |

|                                                                          |           |
|--------------------------------------------------------------------------|-----------|
| ## 'Insurance Class'SP                                                   | 0.0073    |
| ## 'Race:'American Indian/Alaskan Native                                 | 0.0073    |
| ## 'Race:'Asian                                                          | 0.0146    |
| ## 'Race:'Black                                                          | 0.0219    |
| ## 'Race:'Native Hawaiian/Pacific Isle                                   | 0.0000    |
| ## 'Race:'Other                                                          | 0.0292    |
| ## 'Race:'Unknown                                                        | 0.0584    |
| ## 'Does the patient have a history of cancer?'1                         | 0.0438    |
| ## 'Please specify: (choice=Hypertension)'1                              | 0.0803    |
| ## 'Please specify: (choice=Coronary Artery Disease)'1                   | 0.0219    |
| ## 'Please specify: (choice=Congestive Heart Failure)'1                  | 0.0000    |
| ## 'Please specify: (choice=Asthma)'1                                    | 0.0292    |
| ## 'Please specify: (choice=Chronic Obstructive Pulmonary Disease)'1     | 0.0073    |
| ## 'Please specify: (choice=Chronic Renal Insufficiency)'1               | 0.0073    |
| ## 'Please specify: (choice=Cirrhosis)'1                                 | 0.0073    |
| ## 'Did the patient receive hemodialysis during this admission?'1        | 0.0657    |
| ## 'Was plasma given to the patient during this admission?'1             | 0.0365    |
| ## 'Was the patient placed in a prone position during their admission?'1 | 0.1971    |
| ## 'Age at Admission'                                                    | 4.3869    |
| ## Per_Capita                                                            | 3139.3139 |
| ## 'SIRS RR'                                                             | 0.0949    |
| ## SIRS_WBC                                                              | 0.0949    |
| ## SIRS...110                                                            | 0.1460    |
| ## 'Creatinine (if 0 = N/A)'                                             | 0.1168    |
| ## Ferritin                                                              | 959.4504  |
| ## CRP                                                                   | 32.4058   |
| ## 'D-Domer'                                                             | 2314.5255 |
| ## 'Admission Date:'                                                     | 12.4964   |
| ## 'Please specify: (choice=Diabetes)'1                                  | 0.0803    |
| ## 'SIRS TEMP'                                                           | 0.0876    |
| ## 'Please specify: (choice=Chronic- Hepatitis C)'1                      | 0.0000    |
| ##                                                                       | eQQ Max   |
| ## distance                                                              | 0.457     |
| ## 'Insurance Class'COMM                                                 | 1.000     |
| ## 'Insurance Class'MEDICAID                                             | 1.000     |
| ## 'Insurance Class'MEDICARE                                             | 1.000     |
| ## 'Insurance Class'OTHER                                                | 0.000     |
| ## 'Insurance Class'SP                                                   | 1.000     |
| ## 'Race:'American Indian/Alaskan Native                                 | 1.000     |
| ## 'Race:'Asian                                                          | 1.000     |
| ## 'Race:'Black                                                          | 1.000     |
| ## 'Race:'Native Hawaiian/Pacific Isle                                   | 0.000     |
| ## 'Race:'Other                                                          | 1.000     |
| ## 'Race:'Unknown                                                        | 1.000     |
| ## 'Does the patient have a history of cancer?'1                         | 1.000     |
| ## 'Please specify: (choice=Hypertension)'1                              | 1.000     |
| ## 'Please specify: (choice=Coronary Artery Disease)'1                   | 1.000     |
| ## 'Please specify: (choice=Congestive Heart Failure)'1                  | 0.000     |
| ## 'Please specify: (choice=Asthma)'1                                    | 1.000     |
| ## 'Please specify: (choice=Chronic Obstructive Pulmonary Disease)'1     | 1.000     |
| ## 'Please specify: (choice=Chronic Renal Insufficiency)'1               | 1.000     |
| ## 'Please specify: (choice=Cirrhosis)'1                                 | 1.000     |
| ## 'Did the patient receive hemodialysis during this admission?'1        | 1.000     |
| ## 'Was plasma given to the patient during this admission?'1             | 1.000     |

|                                                                         |               |
|-------------------------------------------------------------------------|---------------|
| ## 'Was the patient placed in a prone position during their admission?' | 1.000         |
| ## 'Age at Admission'                                                   | 12.000        |
| ## Per_Capita                                                           | 30530.000     |
| ## 'SIRS RR'                                                            | 1.000         |
| ## SIRS_WBC                                                             | 1.000         |
| ## SIRS...110                                                           | 1.000         |
| ## 'Creatinine (if 0 = N/A)'                                            | 3.500         |
| ## Ferritin                                                             | 107819.700    |
| ## CRP                                                                  | 55.700        |
| ## 'D-Domer'                                                            | 57634.000     |
| ## 'Admission Date:'                                                    | 36.000        |
| ## 'Please specify: (choice=Diabetes)'                                  | 1.000         |
| ## 'SIRS TEMP'                                                          | 1.000         |
| ## 'Please specify: (choice=Chronic- Hepatitis C)'                      | 0.000         |
| ##                                                                      |               |
| ##                                                                      |               |
| ## Summary of balance for matched data:                                 |               |
| ##                                                                      | Means Treated |
| ## distance                                                             | 0.6041        |
| ## 'Insurance Class'COMM                                                | 0.3212        |
| ## 'Insurance Class'MEDICAID                                            | 0.2482        |
| ## 'Insurance Class'MEDICARE                                            | 0.4161        |
| ## 'Insurance Class'OTHER                                               | 0.0000        |
| ## 'Insurance Class'SP                                                  | 0.0146        |
| ## 'Race:'American Indian/Alaskan Native                                | 0.0000        |
| ## 'Race:'Asian                                                         | 0.0219        |
| ## 'Race:'Black                                                         | 0.2044        |
| ## 'Race:'Native Hawaiian/Pacific Isle                                  | 0.0000        |
| ## 'Race:'Other                                                         | 0.0730        |
| ## 'Race:'Unknown                                                       | 0.1460        |
| ## 'Does the patient have a history of cancer?'                         | 0.1241        |
| ## 'Please specify: (choice=Hypertension)'                              | 0.5985        |
| ## 'Please specify: (choice=Coronary Artery Disease)'                   | 0.1241        |
| ## 'Please specify: (choice=Congestive Heart Failure)'                  | 0.0219        |
| ## 'Please specify: (choice=Asthma)'                                    | 0.0584        |
| ## 'Please specify: (choice=Chronic Obstructive Pulmonary Disease)'     | 0.0584        |
| ## 'Please specify: (choice=Chronic Renal Insufficiency)'               | 0.0657        |
| ## 'Please specify: (choice=Cirrhosis)'                                 | 0.0000        |
| ## 'Did the patient receive hemodialysis during this admission?'        | 0.1095        |
| ## 'Was plasma given to the patient during this admission?'             | 0.2044        |
| ## 'Was the patient placed in a prone position during their admission?' | 0.3504        |
| ## 'Age at Admission'                                                   | 63.5693       |
| ## Per_Capita                                                           | 48386.9197    |
| ## 'SIRS RR'                                                            | 0.8029        |
| ## SIRS_WBC                                                             | 0.1679        |
| ## SIRS...110                                                           | 1.9270        |
| ## 'Creatinine (if 0 = N/A)'                                            | 1.1861        |
| ## Ferritin                                                             | 764.9416      |
| ## CRP                                                                  | 151.0547      |
| ## 'D-Domer'                                                            | 6769.0803     |
| ## 'Admission Date:'                                                    | 18358.5985    |
| ## 'Please specify: (choice=Diabetes)'                                  | 0.3869        |
| ## 'SIRS TEMP'                                                          | 0.2920        |
| ## 'Please specify: (choice=Chronic- Hepatitis C)'                      | 0.0073        |

|                                                                          | Means      | Control   |
|--------------------------------------------------------------------------|------------|-----------|
| ##                                                                       |            |           |
| ## distance                                                              |            | 0.3803    |
| ## 'Insurance Class'COMM                                                 |            | 0.2555    |
| ## 'Insurance Class'MEDICAID                                             |            | 0.2482    |
| ## 'Insurance Class'MEDICARE                                             |            | 0.4818    |
| ## 'Insurance Class'OTHER                                                |            | 0.0000    |
| ## 'Insurance Class'SP                                                   |            | 0.0146    |
| ## 'Race:'American Indian/Alaskan Native                                 |            | 0.0000    |
| ## 'Race:'Asian                                                          |            | 0.0146    |
| ## 'Race:'Black                                                          |            | 0.1825    |
| ## 'Race:'Native Hawaiian/Pacific Isle                                   |            | 0.0000    |
| ## 'Race:'Other                                                          |            | 0.0584    |
| ## 'Race:'Unknown                                                        |            | 0.1825    |
| ## 'Does the patient have a history of cancer?'1                         |            | 0.1387    |
| ## 'Please specify: (choice=Hypertension)'1                              |            | 0.5182    |
| ## 'Please specify: (choice=Coronary Artery Disease)'1                   |            | 0.1168    |
| ## 'Please specify: (choice=Congestive Heart Failure)'1                  |            | 0.0292    |
| ## 'Please specify: (choice=Asthma)'1                                    |            | 0.0949    |
| ## 'Please specify: (choice=Chronic Obstructive Pulmonary Disease)'1     |            | 0.0657    |
| ## 'Please specify: (choice=Chronic Renal Insufficiency)'1               |            | 0.0511    |
| ## 'Please specify: (choice=Cirrhosis)'1                                 |            | 0.0000    |
| ## 'Did the patient receive hemodialysis during this admission?'1        |            | 0.0657    |
| ## 'Was plasma given to the patient during this admission?'1             |            | 0.1898    |
| ## 'Was the patient placed in a prone position during their admission?'1 |            | 0.1898    |
| ## 'Age at Admission'                                                    |            | 65.3942   |
| ## Per_Capita                                                            | 48660.0219 |           |
| ## 'SIRS RR'                                                             |            | 0.7956    |
| ## SIRS_WBC                                                              |            | 0.2263    |
| ## SIRS...110                                                            |            | 1.8832    |
| ## 'Creatinine (if 0 = N/A)'                                             |            | 1.0847    |
| ## Ferritin                                                              |            | 629.1533  |
| ## CRP                                                                   |            | 132.2124  |
| ## 'D-Domer'                                                             |            | 4286.7445 |
| ## 'Admission Date:'                                                     | 18365.5036 |           |
| ## 'Please specify: (choice=Diabetes)'1                                  |            | 0.3066    |
| ## 'SIRS TEMP'                                                           |            | 0.2482    |
| ## 'Please specify: (choice=Chronic- Hepatitis C)'1                      |            | 0.0000    |
| ##                                                                       |            |           |
|                                                                          | SD         | Control   |
| ## distance                                                              |            | 0.2190    |
| ## 'Insurance Class'COMM                                                 |            | 0.4377    |
| ## 'Insurance Class'MEDICAID                                             |            | 0.4335    |
| ## 'Insurance Class'MEDICARE                                             |            | 0.5015    |
| ## 'Insurance Class'OTHER                                                |            | 0.0000    |
| ## 'Insurance Class'SP                                                   |            | 0.1204    |
| ## 'Race:'American Indian/Alaskan Native                                 |            | 0.0000    |
| ## 'Race:'Asian                                                          |            | 0.1204    |
| ## 'Race:'Black                                                          |            | 0.3877    |
| ## 'Race:'Native Hawaiian/Pacific Isle                                   |            | 0.0000    |
| ## 'Race:'Other                                                          |            | 0.2353    |
| ## 'Race:'Unknown                                                        |            | 0.3877    |
| ## 'Does the patient have a history of cancer?'1                         |            | 0.3469    |
| ## 'Please specify: (choice=Hypertension)'1                              |            | 0.5015    |
| ## 'Please specify: (choice=Coronary Artery Disease)'1                   |            | 0.3223    |
| ## 'Please specify: (choice=Congestive Heart Failure)'1                  |            | 0.1690    |



|                                                                          |            |
|--------------------------------------------------------------------------|------------|
| ## 'Please specify: (choice=Asthma)'1                                    | 0.2941     |
| ## 'Please specify: (choice=Chronic Obstructive Pulmonary Disease)'1     | 0.2487     |
| ## 'Please specify: (choice=Chronic Renal Insufficiency)'1               | 0.2210     |
| ## 'Please specify: (choice=Cirrhosis)'1                                 | 0.0000     |
| ## 'Did the patient receive hemodialysis during this admission?'1        | 0.2487     |
| ## 'Was plasma given to the patient during this admission?'1             | 0.3936     |
| ## 'Was the patient placed in a prone position during their admission?'1 | 0.3936     |
| ## 'Age at Admission'                                                    | 17.3808    |
| ## Per_Capita                                                            | 21533.8711 |
| ## 'SIRS RR'                                                             | 0.4047     |
| ## SIRS_WBC                                                              | 0.4200     |
| ## SIRS...110                                                            | 0.9782     |
| ## 'Creatinine (if 0 = N/A)'                                             | 1.0582     |
| ## Ferritin                                                              | 442.0046   |
| ## CRP                                                                   | 92.2906    |
| ## 'D-Domer'                                                             | 10938.5545 |
| ## 'Admission Date:'                                                     | 11.4308    |
| ## 'Please specify: (choice=Diabetes)'1                                  | 0.4628     |
| ## 'SIRS TEMP'                                                           | 0.4335     |
| ## 'Please specify: (choice=Chronic- Hepatitis C)'1                      | 0.0000     |
| ##                                                                       | Mean Diff  |
| ## distance                                                              | 0.2238     |
| ## 'Insurance Class'COMM                                                 | 0.0657     |
| ## 'Insurance Class'MEDICAID                                             | 0.0000     |
| ## 'Insurance Class'MEDICARE                                             | -0.0657    |
| ## 'Insurance Class'OTHER                                                | 0.0000     |
| ## 'Insurance Class'SP                                                   | 0.0000     |
| ## 'Race:'American Indian/Alaskan Native                                 | 0.0000     |
| ## 'Race:'Asian                                                          | 0.0073     |
| ## 'Race:'Black                                                          | 0.0219     |
| ## 'Race:'Native Hawaiian/Pacific Isle                                   | 0.0000     |
| ## 'Race:'Other                                                          | 0.0146     |
| ## 'Race:'Unknown                                                        | -0.0365    |
| ## 'Does the patient have a history of cancer?'1                         | -0.0146    |
| ## 'Please specify: (choice=Hypertension)'1                              | 0.0803     |
| ## 'Please specify: (choice=Coronary Artery Disease)'1                   | 0.0073     |
| ## 'Please specify: (choice=Congestive Heart Failure)'1                  | -0.0073    |
| ## 'Please specify: (choice=Asthma)'1                                    | -0.0365    |
| ## 'Please specify: (choice=Chronic Obstructive Pulmonary Disease)'1     | -0.0073    |
| ## 'Please specify: (choice=Chronic Renal Insufficiency)'1               | 0.0146     |
| ## 'Please specify: (choice=Cirrhosis)'1                                 | 0.0000     |
| ## 'Did the patient receive hemodialysis during this admission?'1        | 0.0438     |
| ## 'Was plasma given to the patient during this admission?'1             | 0.0146     |
| ## 'Was the patient placed in a prone position during their admission?'1 | 0.1606     |
| ## 'Age at Admission'                                                    | -1.8248    |
| ## Per_Capita                                                            | -273.1022  |
| ## 'SIRS RR'                                                             | 0.0073     |
| ## SIRS_WBC                                                              | -0.0584    |
| ## SIRS...110                                                            | 0.0438     |
| ## 'Creatinine (if 0 = N/A)'                                             | 0.1015     |
| ## Ferritin                                                              | 135.7883   |
| ## CRP                                                                   | 18.8423    |
| ## 'D-Domer'                                                             | 2482.3358  |
| ## 'Admission Date:'                                                     | -6.9051    |

|                                                                          |           |
|--------------------------------------------------------------------------|-----------|
| ## 'Please specify: (choice=Diabetes)'1                                  | 0.0803    |
| ## 'SIRS TEMP'                                                           | 0.0438    |
| ## 'Please specify: (choice=Chronic- Hepatitis C)'1                      | 0.0073    |
| ##                                                                       | eQQ Med   |
| ## distance                                                              | 0.2489    |
| ## 'Insurance Class'COMM                                                 | 0.0000    |
| ## 'Insurance Class'MEDICAID                                             | 0.0000    |
| ## 'Insurance Class'MEDICARE                                             | 0.0000    |
| ## 'Insurance Class'OTHER                                                | 0.0000    |
| ## 'Insurance Class'SP                                                   | 0.0000    |
| ## 'Race:'American Indian/Alaskan Native                                 | 0.0000    |
| ## 'Race:'Asian                                                          | 0.0000    |
| ## 'Race:'Black                                                          | 0.0000    |
| ## 'Race:'Native Hawaiian/Pacific Isle                                   | 0.0000    |
| ## 'Race:'Other                                                          | 0.0000    |
| ## 'Race:'Unknown                                                        | 0.0000    |
| ## 'Does the patient have a history of cancer?'1                         | 0.0000    |
| ## 'Please specify: (choice=Hypertension)'1                              | 0.0000    |
| ## 'Please specify: (choice=Coronary Artery Disease)'1                   | 0.0000    |
| ## 'Please specify: (choice=Congestive Heart Failure)'1                  | 0.0000    |
| ## 'Please specify: (choice=Asthma)'1                                    | 0.0000    |
| ## 'Please specify: (choice=Chronic Obstructive Pulmonary Disease)'1     | 0.0000    |
| ## 'Please specify: (choice=Chronic Renal Insufficiency)'1               | 0.0000    |
| ## 'Please specify: (choice=Cirrhosis)'1                                 | 0.0000    |
| ## 'Did the patient receive hemodialysis during this admission?'1        | 0.0000    |
| ## 'Was plasma given to the patient during this admission?'1             | 0.0000    |
| ## 'Was the patient placed in a prone position during their admission?'1 | 0.0000    |
| ## 'Age at Admission'                                                    | 3.0000    |
| ## Per_Capita                                                            | 1590.0000 |
| ## 'SIRS RR'                                                             | 0.0000    |
| ## SIRS_WBC                                                              | 0.0000    |
| ## SIRS...110                                                            | 0.0000    |
| ## 'Creatinine (if 0 = N/A)'                                             | 0.1000    |
| ## Ferritin                                                              | 135.0000  |
| ## CRP                                                                   | 25.1000   |
| ## 'D-Domer'                                                             | 103.0000  |
| ## 'Admission Date:'                                                     | 6.0000    |
| ## 'Please specify: (choice=Diabetes)'1                                  | 0.0000    |
| ## 'SIRS TEMP'                                                           | 0.0000    |
| ## 'Please specify: (choice=Chronic- Hepatitis C)'1                      | 0.0000    |
| ##                                                                       | eQQ Mean  |
| ## distance                                                              | 0.2238    |
| ## 'Insurance Class'COMM                                                 | 0.0657    |
| ## 'Insurance Class'MEDICAID                                             | 0.0000    |
| ## 'Insurance Class'MEDICARE                                             | 0.0657    |
| ## 'Insurance Class'OTHER                                                | 0.0000    |
| ## 'Insurance Class'SP                                                   | 0.0000    |
| ## 'Race:'American Indian/Alaskan Native                                 | 0.0000    |
| ## 'Race:'Asian                                                          | 0.0073    |
| ## 'Race:'Black                                                          | 0.0219    |
| ## 'Race:'Native Hawaiian/Pacific Isle                                   | 0.0000    |
| ## 'Race:'Other                                                          | 0.0146    |
| ## 'Race:'Unknown                                                        | 0.0365    |
| ## 'Does the patient have a history of cancer?'1                         | 0.0146    |

|                                                                          |            |
|--------------------------------------------------------------------------|------------|
| ## 'Please specify: (choice=Hypertension)'1                              | 0.0803     |
| ## 'Please specify: (choice=Coronary Artery Disease)'1                   | 0.0073     |
| ## 'Please specify: (choice=Congestive Heart Failure)'1                  | 0.0073     |
| ## 'Please specify: (choice=Asthma)'1                                    | 0.0365     |
| ## 'Please specify: (choice=Chronic Obstructive Pulmonary Disease)'1     | 0.0073     |
| ## 'Please specify: (choice=Chronic Renal Insufficiency)'1               | 0.0146     |
| ## 'Please specify: (choice=Cirrhosis)'1                                 | 0.0000     |
| ## 'Did the patient receive hemodialysis during this admission?'1        | 0.0438     |
| ## 'Was plasma given to the patient during this admission?'1             | 0.0146     |
| ## 'Was the patient placed in a prone position during their admission?'1 | 0.1606     |
| ## 'Age at Admission'                                                    | 3.5182     |
| ## Per_Capita                                                            | 2533.3212  |
| ## 'SIRS RR'                                                             | 0.0073     |
| ## SIRS_WBC                                                              | 0.0584     |
| ## SIRS...110                                                            | 0.0730     |
| ## 'Creatinine (if 0 = N/A)'                                             | 0.1482     |
| ## Ferritin                                                              | 152.4015   |
| ## CRP                                                                   | 21.7533    |
| ## 'D-Domer'                                                             | 2567.8540  |
| ## 'Admission Date:'                                                     | 6.9051     |
| ## 'Please specify: (choice=Diabetes)'1                                  | 0.0803     |
| ## 'SIRS TEMP'                                                           | 0.0438     |
| ## 'Please specify: (choice=Chronic- Hepatitis C)'1                      | 0.0073     |
| ##                                                                       | eQQ Max    |
| ## distance                                                              | 0.3113     |
| ## 'Insurance Class'COMM                                                 | 1.0000     |
| ## 'Insurance Class'MEDICAID                                             | 0.0000     |
| ## 'Insurance Class'MEDICARE                                             | 1.0000     |
| ## 'Insurance Class'OTHER                                                | 0.0000     |
| ## 'Insurance Class'SP                                                   | 0.0000     |
| ## 'Race:'American Indian/Alaskan Native                                 | 0.0000     |
| ## 'Race:'Asian                                                          | 1.0000     |
| ## 'Race:'Black                                                          | 1.0000     |
| ## 'Race:'Native Hawaiian/Pacific Isle                                   | 0.0000     |
| ## 'Race:'Other                                                          | 1.0000     |
| ## 'Race:'Unknown                                                        | 1.0000     |
| ## 'Does the patient have a history of cancer?'1                         | 1.0000     |
| ## 'Please specify: (choice=Hypertension)'1                              | 1.0000     |
| ## 'Please specify: (choice=Coronary Artery Disease)'1                   | 1.0000     |
| ## 'Please specify: (choice=Congestive Heart Failure)'1                  | 1.0000     |
| ## 'Please specify: (choice=Asthma)'1                                    | 1.0000     |
| ## 'Please specify: (choice=Chronic Obstructive Pulmonary Disease)'1     | 1.0000     |
| ## 'Please specify: (choice=Chronic Renal Insufficiency)'1               | 1.0000     |
| ## 'Please specify: (choice=Cirrhosis)'1                                 | 0.0000     |
| ## 'Did the patient receive hemodialysis during this admission?'1        | 1.0000     |
| ## 'Was plasma given to the patient during this admission?'1             | 1.0000     |
| ## 'Was the patient placed in a prone position during their admission?'1 | 1.0000     |
| ## 'Age at Admission'                                                    | 9.0000     |
| ## Per_Capita                                                            | 20909.0000 |
| ## 'SIRS RR'                                                             | 1.0000     |
| ## SIRS_WBC                                                              | 1.0000     |
| ## SIRS...110                                                            | 1.0000     |
| ## 'Creatinine (if 0 = N/A)'                                             | 2.7000     |
| ## Ferritin                                                              | 1138.0000  |

|                                                                          |            |
|--------------------------------------------------------------------------|------------|
| ## CRP                                                                   | 64.1000    |
| ## 'D-Domer'                                                             | 50585.0000 |
| ## 'Admission Date:'                                                     | 15.0000    |
| ## 'Please specify: (choice=Diabetes)'1                                  | 1.0000     |
| ## 'SIRS TEMP'                                                           | 1.0000     |
| ## 'Please specify: (choice=Chronic- Hepatitis C)'1                      | 1.0000     |
| ##                                                                       |            |
| ## Percent Balance Improvement:                                          |            |
| ##                                                                       | Mean Diff. |
| ## distance                                                              | 30.0875    |
| ## 'Insurance Class'COMM                                                 | 12.5191    |
| ## 'Insurance Class'MEDICAID                                             | 100.0000   |
| ## 'Insurance Class'MEDICARE                                             | 44.3149    |
| ## 'Insurance Class'OTHER                                                | 0.0000     |
| ## 'Insurance Class'SP                                                   | 100.0000   |
| ## 'Race:'American Indian/Alaskan Native                                 | 100.0000   |
| ## 'Race:'Asian                                                          | 36.1204    |
| ## 'Race:'Black                                                          | -3.6166    |
| ## 'Race:'Native Hawaiian/Pacific Isle                                   | 0.0000     |
| ## 'Race:'Other                                                          | 43.5746    |
| ## 'Race:'Unknown                                                        | 37.2948    |
| ## 'Does the patient have a history of cancer?'1                         | 66.4028    |
| ## 'Please specify: (choice=Hypertension)'1                              | -7.0846    |
| ## 'Please specify: (choice=Coronary Artery Disease)'1                   | 62.3274    |
| ## 'Please specify: (choice=Congestive Heart Failure)'1                  | -70.5357   |
| ## 'Please specify: (choice=Asthma)'1                                    | -19.2260   |
| ## 'Please specify: (choice=Chronic Obstructive Pulmonary Disease)'1     | -20.8861   |
| ## 'Please specify: (choice=Chronic Renal Insufficiency)'1               | -80.1887   |
| ## 'Please specify: (choice=Cirrhosis)'1                                 | 100.0000   |
| ## 'Did the patient receive hemodialysis during this admission?'1        | 29.7794    |
| ## 'Was plasma given to the patient during this admission?'1             | 53.8089    |
| ## 'Was the patient placed in a prone position during their admission?'1 | 16.9237    |
| ## 'Age at Admission'                                                    | 52.3367    |
| ## Per_Capita                                                            | 84.6465    |
| ## 'SIRS RR'                                                             | 91.9680    |
| ## SIRS_WBC                                                              | 37.8103    |
| ## SIRS...110                                                            | 69.0855    |
| ## 'Creatinine (if 0 = N/A)'                                             | -20.7322   |
| ## Ferritin                                                              | 66.3436    |
| ## CRP                                                                   | 36.7446    |
| ## 'D-Domer'                                                             | -23.6948   |
| ## 'Admission Date:'                                                     | 45.3130    |
| ## 'Please specify: (choice=Diabetes)'1                                  | -2.9902    |
| ## 'SIRS TEMP'                                                           | 46.9444    |
| ## 'Please specify: (choice=Chronic- Hepatitis C)'1                      | -253.7037  |
| ##                                                                       | eQQ Med    |
| ## distance                                                              | 29.0588    |
| ## 'Insurance Class'COMM                                                 | 0.0000     |
| ## 'Insurance Class'MEDICAID                                             | 0.0000     |
| ## 'Insurance Class'MEDICARE                                             | 0.0000     |
| ## 'Insurance Class'OTHER                                                | 0.0000     |
| ## 'Insurance Class'SP                                                   | 0.0000     |
| ## 'Race:'American Indian/Alaskan Native                                 | 0.0000     |
| ## 'Race:'Asian                                                          | 0.0000     |

|                                                                          |           |
|--------------------------------------------------------------------------|-----------|
| ## 'Race:'Black                                                          | 0.0000    |
| ## 'Race:'Native Hawaiian/Pacific Isle                                   | 0.0000    |
| ## 'Race:'Other                                                          | 0.0000    |
| ## 'Race:'Unknown                                                        | 0.0000    |
| ## 'Does the patient have a history of cancer?'1                         | 0.0000    |
| ## 'Please specify: (choice=Hypertension)'1                              | 0.0000    |
| ## 'Please specify: (choice=Coronary Artery Disease)'1                   | 0.0000    |
| ## 'Please specify: (choice=Congestive Heart Failure)'1                  | 0.0000    |
| ## 'Please specify: (choice=Asthma)'1                                    | 0.0000    |
| ## 'Please specify: (choice=Chronic Obstructive Pulmonary Disease)'1     | 0.0000    |
| ## 'Please specify: (choice=Chronic Renal Insufficiency)'1               | 0.0000    |
| ## 'Please specify: (choice=Cirrhosis)'1                                 | 0.0000    |
| ## 'Did the patient receive hemodialysis during this admission?'1        | 0.0000    |
| ## 'Was plasma given to the patient during this admission?'1             | 0.0000    |
| ## 'Was the patient placed in a prone position during their admission?'1 | 0.0000    |
| ## 'Age at Admission'                                                    | 25.0000   |
| ## Per_Capita                                                            | 8.4101    |
| ## 'SIRS RR'                                                             | 0.0000    |
| ## SIRS_WBC                                                              | 0.0000    |
| ## SIRS...110                                                            | 0.0000    |
| ## 'Creatinine (if 0 = N/A)'                                             | 0.0000    |
| ## Ferritin                                                              | 17.6829   |
| ## CRP                                                                   | 31.6076   |
| ## 'D-Domer'                                                             | 30.4054   |
| ## 'Admission Date:'                                                     | 53.8462   |
| ## 'Please specify: (choice=Diabetes)'1                                  | 0.0000    |
| ## 'SIRS TEMP'                                                           | 0.0000    |
| ## 'Please specify: (choice=Chronic- Hepatitis C)'1                      | 0.0000    |
| ##                                                                       | eQQ Mean  |
| ## distance                                                              | 30.5024   |
| ## 'Insurance Class'COMM                                                 | 18.1818   |
| ## 'Insurance Class'MEDICAID                                             | 100.0000  |
| ## 'Insurance Class'MEDICARE                                             | 43.7500   |
| ## 'Insurance Class'OTHER                                                | 0.0000    |
| ## 'Insurance Class'SP                                                   | 100.0000  |
| ## 'Race:'American Indian/Alaskan Native                                 | 100.0000  |
| ## 'Race:'Asian                                                          | 50.0000   |
| ## 'Race:'Black                                                          | 0.0000    |
| ## 'Race:'Native Hawaiian/Pacific Isle                                   | 0.0000    |
| ## 'Race:'Other                                                          | 50.0000   |
| ## 'Race:'Unknown                                                        | 37.5000   |
| ## 'Does the patient have a history of cancer?'1                         | 66.6667   |
| ## 'Please specify: (choice=Hypertension)'1                              | 0.0000    |
| ## 'Please specify: (choice=Coronary Artery Disease)'1                   | 66.6667   |
| ## 'Please specify: (choice=Congestive Heart Failure)'1                  | -Inf      |
| ## 'Please specify: (choice=Asthma)'1                                    | -25.0000  |
| ## 'Please specify: (choice=Chronic Obstructive Pulmonary Disease)'1     | 0.0000    |
| ## 'Please specify: (choice=Chronic Renal Insufficiency)'1               | -100.0000 |
| ## 'Please specify: (choice=Cirrhosis)'1                                 | 100.0000  |
| ## 'Did the patient receive hemodialysis during this admission?'1        | 33.3333   |
| ## 'Was plasma given to the patient during this admission?'1             | 60.0000   |
| ## 'Was the patient placed in a prone position during their admission?'1 | 18.5185   |
| ## 'Age at Admission'                                                    | 19.8003   |
| ## Per_Capita                                                            | 19.3033   |

```

## 'SIRS RR' 92.3077
## SIRS_WBC 38.4615
## SIRS...110 50.0000
## 'Creatinine (if 0 = N/A)' -26.8750
## Ferritin 84.1158
## CRP 32.8723
## 'D-Domer' -10.9452
## 'Admission Date:' 44.7430
## 'Please specify: (choice=Diabetes)'1 0.0000
## 'SIRS TEMP' 50.0000
## 'Please specify: (choice=Chronic- Hepatitis C)'1 -Inf
## eQQ Max
## distance 31.8979
## 'Insurance Class'COMM 0.0000
## 'Insurance Class'MEDICAID 100.0000
## 'Insurance Class'MEDICARE 0.0000
## 'Insurance Class'OTHER 0.0000
## 'Insurance Class'SP 100.0000
## 'Race:'American Indian/Alaskan Native 100.0000
## 'Race:'Asian 0.0000
## 'Race:'Black 0.0000
## 'Race:'Native Hawaiian/Pacific Isle 0.0000
## 'Race:'Other 0.0000
## 'Race:'Unknown 0.0000
## 'Does the patient have a history of cancer?'1 0.0000
## 'Please specify: (choice=Hypertension)'1 0.0000
## 'Please specify: (choice=Coronary Artery Disease)'1 0.0000
## 'Please specify: (choice=Congestive Heart Failure)'1 -Inf
## 'Please specify: (choice=Asthma)'1 0.0000
## 'Please specify: (choice=Chronic Obstructive Pulmonary Disease)'1 0.0000
## 'Please specify: (choice=Chronic Renal Insufficiency)'1 0.0000
## 'Please specify: (choice=Cirrhosis)'1 100.0000
## 'Did the patient receive hemodialysis during this admission?'1 0.0000
## 'Was plasma given to the patient during this admission?'1 0.0000
## 'Was the patient placed in a prone position during their admission?'1 0.0000
## 'Age at Admission' 25.0000
## Per_Capita 31.5133
## 'SIRS RR' 0.0000
## SIRS_WBC 0.0000
## SIRS...110 0.0000
## 'Creatinine (if 0 = N/A)' 22.8571
## Ferritin 98.9445
## CRP -15.0808
## 'D-Domer' 12.2306
## 'Admission Date:' 58.3333
## 'Please specify: (choice=Diabetes)'1 0.0000
## 'SIRS TEMP' 0.0000
## 'Please specify: (choice=Chronic- Hepatitis C)'1 -Inf
##
## Sample sizes:
## Control Treated
## All 191 137
## Matched 137 137
## Unmatched 54 0

```

```
## Discarded      0      0
```

```
matched.cohort.hcq = get_matches(my.hcq.match, hcq.select.na, id_cols = NULL, newdata = NULL) #274 pts  
  
# is there any difference between the groups  
binary.variables.hcq = matched.cohort.hcq %>%  
  dplyr::select(Was.plasma.given.to.the.patient.during.this.admission., Does.the.patient.have.a.history)  
  
chi.p.exit.hcq = vector()  
chi.variable.name.hcq = vector()  
  
for ( i in c(1:8,10:11, 13,14,15)) { # cirrhosis one level  
  variable.1 = binary.variables.hcq[[i]][binary.variables.hcq$COVID..Was.hydroxychloroquine..Plaquenil.  
  variable.0 = binary.variables.hcq[[i]][binary.variables.hcq$COVID..Was.hydroxychloroquine..Plaquenil.  
  chisquare.test = chisq.test(variable.1, variable.0)  
  chisquare.test.p.value = chisquare.test$p.value  
  chi.p.exit.hcq[i] = chisquare.test.p.value  
  chi.variable.name.hcq[i] = colnames(binary.variables.hcq)[i]  
}
```

```
## Warning in chisq.test(variable.1, variable.0): Chi-squared approximation may be  
## incorrect
```

```
## Warning in chisq.test(variable.1, variable.0): Chi-squared approximation may be  
## incorrect
```

```
## Warning in chisq.test(variable.1, variable.0): Chi-squared approximation may be  
## incorrect
```

```
## Warning in chisq.test(variable.1, variable.0): Chi-squared approximation may be  
## incorrect
```

```
## Warning in chisq.test(variable.1, variable.0): Chi-squared approximation may be  
## incorrect
```

```
## Warning in chisq.test(variable.1, variable.0): Chi-squared approximation may be  
## incorrect
```

```
## Warning in chisq.test(variable.1, variable.0): Chi-squared approximation may be  
## incorrect
```

```
## Warning in chisq.test(variable.1, variable.0): Chi-squared approximation may be  
## incorrect
```

```
## Warning in chisq.test(variable.1, variable.0): Chi-squared approximation may be  
## incorrect
```

```
chi.df.hcq = data.frame(chi.variable.name.hcq, chi.p.exit.hcq) # proning diff
```

```
numerical.variables.hcq = matched.cohort.hcq %>%  
  dplyr::select(COVID..Was.hydroxychloroquine..Plaquenil..given.during.the.patient.s.admission., Age.at  
p.value.exit.hcq = vector()
```

```

variable.name.exit.hcq = vector()

for ( i in c(2:10,12)) { # hcq 1 # skip date
  variable.1 = numerical.variables.hcq[[i]][numerical.variables.hcq$COVID..Was.hydroxychloroquine..Plaque
  variable.0 = numerical.variables.hcq[[i]][numerical.variables.hcq$COVID..Was.hydroxychloroquine..Plaque
  middle.t.test = t.test(variable.1, variable.0)
  t.test.p.value = middle.t.test$p.value
  p.value.exit.hcq[i] = t.test.p.value
  variable.name.exit.hcq[i] = colnames(numerical.variables.hcq)[i]
}

t.test.df.hcq = data.frame(variable.name.exit.hcq, p.value.exit.hcq) # Sig different: ferritin

## only significant different one in matching is length of stay
match.hcq.glm = glm(death ~ COVID..Was.hydroxychloroquine..Plaquenil..given.during.the.patient.s.admissi
match.hcq.summary = summary(match.hcq.glm) # p 0.000991 ss = 122
match.hcq.conf.intervals = exp(cbind(coef(match.hcq.glm), confint(match.hcq.glm))) # OR = 3.6076555 1.7

## Waiting for profiling to be done...

row.names(hcq.select.no.labs.na) <- 1:nrow(hcq.select.no.labs.na)

my.full.match.hcq.2 = matchit('COVID- Was hydroxychloroquine (Plaquenil) given during the patient's adm
summary(my.full.match.hcq.2)

##
## Call:
## matchit(formula = 'COVID- Was hydroxychloroquine (Plaquenil) given during the patient's admission?' +
##   'Insurance Class' + 'Race:' + 'Does the patient have a history of cancer?' +
##   'Please specify: (choice=Hypertension)' + 'Please specify: (choice=Coronary Artery Disease)' +
##   'Please specify: (choice=Congestive Heart Failure)' +
##   'Please specify: (choice=Asthma)' + 'Please specify: (choice=Chronic Obstructive Pulmonary D
##   'Please specify: (choice=Chronic Renal Insufficiency)' +
##   'Please specify: (choice=Cirrhosis)' + 'Did the patient receive hemodialysis during this adm
##   'Was plasma given to the patient during this admission?' +
##   'Was the patient placed in a prone position during their admission?' +
##   'Age at Admission' + Per_Capita + 'SIRS RR' + SIRS_WBC +
##   SIRS...110 + 'Creatinine (if 0 = N/A)' + 'Admission Date:' +
##   'Please specify: (choice=Diabetes)' + 'SIRS TEMP' + 'Please specify: (choice=Chronic- Hepati
##   data = hcq.select.no.labs.na, method = "nearest")
##
## Summary of balance for all data:
##
##                                     Means Treated
## distance                               0.5040
## 'Insurance Class'COMM                   0.3391
## 'Insurance Class'MEDICAID                0.2270
## 'Insurance Class'MEDICARE                0.4167
## 'Insurance Class'OTHER                   0.0000
## 'Insurance Class'SP                      0.0172
## 'Race:'American Indian/Alaskan Native   0.0057
## 'Race:'Asian                             0.0201
## 'Race:'Black                             0.2040

```



|                                                                          |               |
|--------------------------------------------------------------------------|---------------|
| ## 'Race:'Native Hawaiian/Pacific Isle                                   | 0.0000        |
| ## 'Race:'Other                                                          | 0.0603        |
| ## 'Race:'Unknown                                                        | 0.1552        |
| ## 'Does the patient have a history of cancer?'1                         | 0.1379        |
| ## 'Please specify: (choice=Hypertension)'1                              | 0.5172        |
| ## 'Please specify: (choice=Coronary Artery Disease)'1                   | 0.1207        |
| ## 'Please specify: (choice=Congestive Heart Failure)'1                  | 0.0316        |
| ## 'Please specify: (choice=Asthma)'1                                    | 0.0603        |
| ## 'Please specify: (choice=Chronic Obstructive Pulmonary Disease)'1     | 0.0603        |
| ## 'Please specify: (choice=Chronic Renal Insufficiency)'1               | 0.0776        |
| ## 'Please specify: (choice=Cirrhosis)'1                                 | 0.0000        |
| ## 'Did the patient receive hemodialysis during this admission?'1        | 0.1006        |
| ## 'Was plasma given to the patient during this admission?'1             | 0.1494        |
| ## 'Was the patient placed in a prone position during their admission?'1 | 0.3046        |
| ## 'Age at Admission'                                                    | 63.8420       |
| ## Per_Capita                                                            | 50036.1236    |
| ## 'SIRS RR'                                                             | 0.7730        |
| ## SIRS_WBC                                                              | 0.2385        |
| ## SIRS...110                                                            | 1.9397        |
| ## 'Creatinine (if 0 = N/A)'                                             | 1.2552        |
| ## 'Admission Date:'                                                     | 18355.6523    |
| ## 'Please specify: (choice=Diabetes)'1                                  | 0.3391        |
| ## 'SIRS TEMP'                                                           | 0.3132        |
| ## 'Please specify: (choice=Chronic- Hepatitis C)'1                      | 0.0086        |
| ##                                                                       | Means Control |
| ## distance                                                              | 0.2680        |
| ## 'Insurance Class'COMM                                                 | 0.2500        |
| ## 'Insurance Class'MEDICAID                                             | 0.1755        |
| ## 'Insurance Class'MEDICARE                                             | 0.5652        |
| ## 'Insurance Class'OTHER                                                | 0.0016        |
| ## 'Insurance Class'SP                                                   | 0.0078        |
| ## 'Race:'American Indian/Alaskan Native                                 | 0.0047        |
| ## 'Race:'Asian                                                          | 0.0217        |
| ## 'Race:'Black                                                          | 0.1941        |
| ## 'Race:'Native Hawaiian/Pacific Isle                                   | 0.0016        |
| ## 'Race:'Other                                                          | 0.0419        |
| ## 'Race:'Unknown                                                        | 0.1506        |
| ## 'Does the patient have a history of cancer?'1                         | 0.1630        |
| ## 'Please specify: (choice=Hypertension)'1                              | 0.5450        |
| ## 'Please specify: (choice=Coronary Artery Disease)'1                   | 0.1444        |
| ## 'Please specify: (choice=Congestive Heart Failure)'1                  | 0.0730        |
| ## 'Please specify: (choice=Asthma)'1                                    | 0.0652        |
| ## 'Please specify: (choice=Chronic Obstructive Pulmonary Disease)'1     | 0.0823        |
| ## 'Please specify: (choice=Chronic Renal Insufficiency)'1               | 0.0683        |
| ## 'Please specify: (choice=Cirrhosis)'1                                 | 0.0155        |
| ## 'Did the patient receive hemodialysis during this admission?'1        | 0.0528        |
| ## 'Was plasma given to the patient during this admission?'1             | 0.0823        |
| ## 'Was the patient placed in a prone position during their admission?'1 | 0.1149        |
| ## 'Age at Admission'                                                    | 67.7391       |
| ## Per_Capita                                                            | 51876.8742    |
| ## 'SIRS RR'                                                             | 0.6429        |
| ## SIRS_WBC                                                              | 0.2516        |
| ## SIRS...110                                                            | 1.6786        |
| ## 'Creatinine (if 0 = N/A)'                                             | 1.3752        |

|                                                                          |            |
|--------------------------------------------------------------------------|------------|
| ## 'Admission Date:'                                                     | 18367.1522 |
| ## 'Please specify: (choice=Diabetes)'1                                  | 0.3075     |
| ## 'SIRS TEMP'                                                           | 0.2127     |
| ## 'Please specify: (choice=Chronic- Hepatitis C)'1                      | 0.0062     |
| ##                                                                       | SD Control |
| ## distance                                                              | 0.2048     |
| ## 'Insurance Class'COMM                                                 | 0.4333     |
| ## 'Insurance Class'MEDICAID                                             | 0.3807     |
| ## 'Insurance Class'MEDICARE                                             | 0.4961     |
| ## 'Insurance Class'OTHER                                                | 0.0394     |
| ## 'Insurance Class'SP                                                   | 0.0878     |
| ## 'Race:'American Indian/Alaskan Native                                 | 0.0681     |
| ## 'Race:'Asian                                                          | 0.1459     |
| ## 'Race:'Black                                                          | 0.3958     |
| ## 'Race:'Native Hawaiian/Pacific Isle                                   | 0.0394     |
| ## 'Race:'Other                                                          | 0.2006     |
| ## 'Race:'Unknown                                                        | 0.3580     |
| ## 'Does the patient have a history of cancer?'1                         | 0.3697     |
| ## 'Please specify: (choice=Hypertension)'1                              | 0.4984     |
| ## 'Please specify: (choice=Coronary Artery Disease)'1                   | 0.3518     |
| ## 'Please specify: (choice=Congestive Heart Failure)'1                  | 0.2603     |
| ## 'Please specify: (choice=Asthma)'1                                    | 0.2471     |
| ## 'Please specify: (choice=Chronic Obstructive Pulmonary Disease)'1     | 0.2750     |
| ## 'Please specify: (choice=Chronic Renal Insufficiency)'1               | 0.2525     |
| ## 'Please specify: (choice=Cirrhosis)'1                                 | 0.1237     |
| ## 'Did the patient receive hemodialysis during this admission?'1        | 0.2238     |
| ## 'Was plasma given to the patient during this admission?'1             | 0.2750     |
| ## 'Was the patient placed in a prone position during their admission?'1 | 0.3192     |
| ## 'Age at Admission'                                                    | 18.3275    |
| ## Per_Capita                                                            | 25092.8188 |
| ## 'SIRS RR'                                                             | 0.4795     |
| ## SIRS_WBC                                                              | 0.4342     |
| ## SIRS...110                                                            | 1.0011     |
| ## 'Creatinine (if 0 = N/A)'                                             | 1.7388     |
| ## 'Admission Date:'                                                     | 17.1454    |
| ## 'Please specify: (choice=Diabetes)'1                                  | 0.4618     |
| ## 'SIRS TEMP'                                                           | 0.4096     |
| ## 'Please specify: (choice=Chronic- Hepatitis C)'1                      | 0.0786     |
| ##                                                                       | Mean Diff  |
| ## distance                                                              | 0.2360     |
| ## 'Insurance Class'COMM                                                 | 0.0891     |
| ## 'Insurance Class'MEDICAID                                             | 0.0515     |
| ## 'Insurance Class'MEDICARE                                             | -0.1486    |
| ## 'Insurance Class'OTHER                                                | -0.0016    |
| ## 'Insurance Class'SP                                                   | 0.0095     |
| ## 'Race:'American Indian/Alaskan Native                                 | 0.0011     |
| ## 'Race:'Asian                                                          | -0.0016    |
| ## 'Race:'Black                                                          | 0.0099     |
| ## 'Race:'Native Hawaiian/Pacific Isle                                   | -0.0016    |
| ## 'Race:'Other                                                          | 0.0184     |
| ## 'Race:'Unknown                                                        | 0.0046     |
| ## 'Does the patient have a history of cancer?'1                         | -0.0251    |
| ## 'Please specify: (choice=Hypertension)'1                              | -0.0278    |
| ## 'Please specify: (choice=Coronary Artery Disease)'1                   | -0.0237    |

|                                                                          |            |
|--------------------------------------------------------------------------|------------|
| ## 'Please specify: (choice=Congestive Heart Failure)'1                  | -0.0414    |
| ## 'Please specify: (choice=Asthma)'1                                    | -0.0049    |
| ## 'Please specify: (choice=Chronic Obstructive Pulmonary Disease)'1     | -0.0220    |
| ## 'Please specify: (choice=Chronic Renal Insufficiency)'1               | 0.0093     |
| ## 'Please specify: (choice=Cirrhosis)'1                                 | -0.0155    |
| ## 'Did the patient receive hemodialysis during this admission?'1        | 0.0478     |
| ## 'Was plasma given to the patient during this admission?'1             | 0.0671     |
| ## 'Was the patient placed in a prone position during their admission?'1 | 0.1897     |
| ## 'Age at Admission'                                                    | -3.8972    |
| ## Per_Capita                                                            | -1840.7507 |
| ## 'SIRS RR'                                                             | 0.1301     |
| ## SIRS_WBC                                                              | -0.0130    |
| ## SIRS...110                                                            | 0.2611     |
| ## 'Creatinine (if 0 = N/A)'                                             | -0.1200    |
| ## 'Admission Date:'                                                     | -11.4999   |
| ## 'Please specify: (choice=Diabetes)'1                                  | 0.0316     |
| ## 'SIRS TEMP'                                                           | 0.1005     |
| ## 'Please specify: (choice=Chronic- Hepatitis C)'1                      | 0.0024     |
| ##                                                                       | eQQ Med    |
| ## distance                                                              | 0.2522     |
| ## 'Insurance Class'COMM                                                 | 0.0000     |
| ## 'Insurance Class'MEDICAID                                             | 0.0000     |
| ## 'Insurance Class'MEDICARE                                             | 0.0000     |
| ## 'Insurance Class'OTHER                                                | 0.0000     |
| ## 'Insurance Class'SP                                                   | 0.0000     |
| ## 'Race:'American Indian/Alaskan Native                                 | 0.0000     |
| ## 'Race:'Asian                                                          | 0.0000     |
| ## 'Race:'Black                                                          | 0.0000     |
| ## 'Race:'Native Hawaiian/Pacific Isle                                   | 0.0000     |
| ## 'Race:'Other                                                          | 0.0000     |
| ## 'Race:'Unknown                                                        | 0.0000     |
| ## 'Does the patient have a history of cancer?'1                         | 0.0000     |
| ## 'Please specify: (choice=Hypertension)'1                              | 0.0000     |
| ## 'Please specify: (choice=Coronary Artery Disease)'1                   | 0.0000     |
| ## 'Please specify: (choice=Congestive Heart Failure)'1                  | 0.0000     |
| ## 'Please specify: (choice=Asthma)'1                                    | 0.0000     |
| ## 'Please specify: (choice=Chronic Obstructive Pulmonary Disease)'1     | 0.0000     |
| ## 'Please specify: (choice=Chronic Renal Insufficiency)'1               | 0.0000     |
| ## 'Please specify: (choice=Cirrhosis)'1                                 | 0.0000     |
| ## 'Did the patient receive hemodialysis during this admission?'1        | 0.0000     |
| ## 'Was plasma given to the patient during this admission?'1             | 0.0000     |
| ## 'Was the patient placed in a prone position during their admission?'1 | 0.0000     |
| ## 'Age at Admission'                                                    | 4.0000     |
| ## Per_Capita                                                            | 1600.0000  |
| ## 'SIRS RR'                                                             | 0.0000     |
| ## SIRS_WBC                                                              | 0.0000     |
| ## SIRS...110                                                            | 0.0000     |
| ## 'Creatinine (if 0 = N/A)'                                             | 0.0000     |
| ## 'Admission Date:'                                                     | 10.0000    |
| ## 'Please specify: (choice=Diabetes)'1                                  | 0.0000     |
| ## 'SIRS TEMP'                                                           | 0.0000     |
| ## 'Please specify: (choice=Chronic- Hepatitis C)'1                      | 0.0000     |
| ##                                                                       | eQQ Mean   |
| ## distance                                                              | 0.2364     |

|                                                                          |           |
|--------------------------------------------------------------------------|-----------|
| ## 'Insurance Class'COMM                                                 | 0.0891    |
| ## 'Insurance Class'MEDICAID                                             | 0.0517    |
| ## 'Insurance Class'MEDICARE                                             | 0.1466    |
| ## 'Insurance Class'OTHER                                                | 0.0029    |
| ## 'Insurance Class'SP                                                   | 0.0086    |
| ## 'Race:'American Indian/Alaskan Native                                 | 0.0000    |
| ## 'Race:'Asian                                                          | 0.0029    |
| ## 'Race:'Black                                                          | 0.0115    |
| ## 'Race:'Native Hawaiian/Pacific Isle                                   | 0.0029    |
| ## 'Race:'Other                                                          | 0.0172    |
| ## 'Race:'Unknown                                                        | 0.0057    |
| ## 'Does the patient have a history of cancer?'1                         | 0.0259    |
| ## 'Please specify: (choice=Hypertension)'1                              | 0.0259    |
| ## 'Please specify: (choice=Coronary Artery Disease)'1                   | 0.0230    |
| ## 'Please specify: (choice=Congestive Heart Failure)'1                  | 0.0402    |
| ## 'Please specify: (choice=Asthma)'1                                    | 0.0057    |
| ## 'Please specify: (choice=Chronic Obstructive Pulmonary Disease)'1     | 0.0230    |
| ## 'Please specify: (choice=Chronic Renal Insufficiency)'1               | 0.0086    |
| ## 'Please specify: (choice=Cirrhosis)'1                                 | 0.0144    |
| ## 'Did the patient receive hemodialysis during this admission?'1        | 0.0489    |
| ## 'Was plasma given to the patient during this admission?'1             | 0.0661    |
| ## 'Was the patient placed in a prone position during their admission?'1 | 0.1897    |
| ## 'Age at Admission'                                                    | 4.8333    |
| ## Per_Capita                                                            | 2959.3132 |
| ## 'SIRS RR'                                                             | 0.1322    |
| ## SIRS_WBC                                                              | 0.0115    |
| ## SIRS...110                                                            | 0.2644    |
| ## 'Creatinine (if 0 = N/A)'                                             | 0.1693    |
| ## 'Admission Date:'                                                     | 11.4943   |
| ## 'Please specify: (choice=Diabetes)'1                                  | 0.0316    |
| ## 'SIRS TEMP'                                                           | 0.1006    |
| ## 'Please specify: (choice=Chronic- Hepatitis C)'1                      | 0.0029    |
| ##                                                                       | eQQ Max   |
| ## distance                                                              | 0.2923    |
| ## 'Insurance Class'COMM                                                 | 1.0000    |
| ## 'Insurance Class'MEDICAID                                             | 1.0000    |
| ## 'Insurance Class'MEDICARE                                             | 1.0000    |
| ## 'Insurance Class'OTHER                                                | 1.0000    |
| ## 'Insurance Class'SP                                                   | 1.0000    |
| ## 'Race:'American Indian/Alaskan Native                                 | 0.0000    |
| ## 'Race:'Asian                                                          | 1.0000    |
| ## 'Race:'Black                                                          | 1.0000    |
| ## 'Race:'Native Hawaiian/Pacific Isle                                   | 1.0000    |
| ## 'Race:'Other                                                          | 1.0000    |
| ## 'Race:'Unknown                                                        | 1.0000    |
| ## 'Does the patient have a history of cancer?'1                         | 1.0000    |
| ## 'Please specify: (choice=Hypertension)'1                              | 1.0000    |
| ## 'Please specify: (choice=Coronary Artery Disease)'1                   | 1.0000    |
| ## 'Please specify: (choice=Congestive Heart Failure)'1                  | 1.0000    |
| ## 'Please specify: (choice=Asthma)'1                                    | 1.0000    |
| ## 'Please specify: (choice=Chronic Obstructive Pulmonary Disease)'1     | 1.0000    |
| ## 'Please specify: (choice=Chronic Renal Insufficiency)'1               | 1.0000    |
| ## 'Please specify: (choice=Cirrhosis)'1                                 | 1.0000    |
| ## 'Did the patient receive hemodialysis during this admission?'1        | 1.0000    |

```

## 'Was plasma given to the patient during this admission?'1      1.0000
## 'Was the patient placed in a prone position during their admission?'1  1.0000
## 'Age at Admission'                                           10.0000
## Per_Capita                                                    263789.0000
## 'SIRS RR'                                                     1.0000
## SIRS_WBC                                                       1.0000
## SIRS...110                                                    1.0000
## 'Creatinine (if 0 = N/A)'<                                     3.2000
## 'Admission Date:'                                             34.0000
## 'Please specify: (choice=Diabetes)'1                          1.0000
## 'SIRS TEMP'                                                  1.0000
## 'Please specify: (choice=Chronic- Hepatitis C)'1             1.0000
##
##
## Summary of balance for matched data:
##
##
## Means Treated
## distance                                                       0.5040
## 'Insurance Class'COMM                                         0.3391
## 'Insurance Class'MEDICAID                                     0.2270
## 'Insurance Class'MEDICARE                                     0.4167
## 'Insurance Class'OTHER                                       0.0000
## 'Insurance Class'SP                                          0.0172
## 'Race:'American Indian/Alaskan Native                       0.0057
## 'Race:'Asian                                                 0.0201
## 'Race:'Black                                                 0.2040
## 'Race:'Native Hawaiian/Pacific Isle                         0.0000
## 'Race:'Other                                                0.0603
## 'Race:'Unknown                                              0.1552
## 'Does the patient have a history of cancer?'1              0.1379
## 'Please specify: (choice=Hypertension)'1                    0.5172
## 'Please specify: (choice=Coronary Artery Disease)'1         0.1207
## 'Please specify: (choice=Congestive Heart Failure)'1        0.0316
## 'Please specify: (choice=Asthma)'1                          0.0603
## 'Please specify: (choice=Chronic Obstructive Pulmonary Disease)'1  0.0603
## 'Please specify: (choice=Chronic Renal Insufficiency)'1    0.0776
## 'Please specify: (choice=Cirrhosis)'1                       0.0000
## 'Did the patient receive hemodialysis during this admission?'1  0.1006
## 'Was plasma given to the patient during this admission?'1  0.1494
## 'Was the patient placed in a prone position during their admission?'1  0.3046
## 'Age at Admission'                                           63.8420
## Per_Capita                                                    50036.1236
## 'SIRS RR'                                                     0.7730
## SIRS_WBC                                                       0.2385
## SIRS...110                                                    1.9397
## 'Creatinine (if 0 = N/A)'<                                     1.2552
## 'Admission Date:'                                             18355.6523
## 'Please specify: (choice=Diabetes)'1                          0.3391
## 'SIRS TEMP'                                                  0.3132
## 'Please specify: (choice=Chronic- Hepatitis C)'1             0.0086
##
## Means Control
## distance                                                       0.4136
## 'Insurance Class'COMM                                         0.3190
## 'Insurance Class'MEDICAID                                     0.2184
## 'Insurance Class'MEDICARE                                     0.4540

```

|                                                                          |            |
|--------------------------------------------------------------------------|------------|
| ## 'Insurance Class'OTHER                                                | 0.0000     |
| ## 'Insurance Class'SP                                                   | 0.0086     |
| ## 'Race:'American Indian/Alaskan Native                                 | 0.0029     |
| ## 'Race:'Asian                                                          | 0.0259     |
| ## 'Race:'Black                                                          | 0.2011     |
| ## 'Race:'Native Hawaiian/Pacific Isle                                   | 0.0000     |
| ## 'Race:'Other                                                          | 0.0460     |
| ## 'Race:'Unknown                                                        | 0.1437     |
| ## 'Does the patient have a history of cancer?'1                         | 0.1437     |
| ## 'Please specify: (choice=Hypertension)'1                              | 0.5201     |
| ## 'Please specify: (choice=Coronary Artery Disease)'1                   | 0.1149     |
| ## 'Please specify: (choice=Congestive Heart Failure)'1                  | 0.0316     |
| ## 'Please specify: (choice=Asthma)'1                                    | 0.0661     |
| ## 'Please specify: (choice=Chronic Obstructive Pulmonary Disease)'1     | 0.0632     |
| ## 'Please specify: (choice=Chronic Renal Insufficiency)'1               | 0.0776     |
| ## 'Please specify: (choice=Cirrhosis)'1                                 | 0.0000     |
| ## 'Did the patient receive hemodialysis during this admission?'1        | 0.0661     |
| ## 'Was plasma given to the patient during this admission?'1             | 0.1034     |
| ## 'Was the patient placed in a prone position during their admission?'1 | 0.1753     |
| ## 'Age at Admission'                                                    | 65.1379    |
| ## Per_Capita                                                            | 49975.4138 |
| ## 'SIRS RR'                                                             | 0.7069     |
| ## SIRS_WBC                                                              | 0.2443     |
| ## SIRS...110                                                            | 1.8305     |
| ## 'Creatinine (if 0 = N/A)'                                             | 1.3118     |
| ## 'Admission Date:'                                                     | 18357.0718 |
| ## 'Please specify: (choice=Diabetes)'1                                  | 0.3161     |
| ## 'SIRS TEMP'                                                           | 0.2845     |
| ## 'Please specify: (choice=Chronic- Hepatitis C)'1                      | 0.0029     |
| ##                                                                       | SD Control |
| ## distance                                                              | 0.1649     |
| ## 'Insurance Class'COMM                                                 | 0.4667     |
| ## 'Insurance Class'MEDICAID                                             | 0.4137     |
| ## 'Insurance Class'MEDICARE                                             | 0.4986     |
| ## 'Insurance Class'OTHER                                                | 0.0000     |
| ## 'Insurance Class'SP                                                   | 0.0926     |
| ## 'Race:'American Indian/Alaskan Native                                 | 0.0536     |
| ## 'Race:'Asian                                                          | 0.1590     |
| ## 'Race:'Black                                                          | 0.4014     |
| ## 'Race:'Native Hawaiian/Pacific Isle                                   | 0.0000     |
| ## 'Race:'Other                                                          | 0.2097     |
| ## 'Race:'Unknown                                                        | 0.3513     |
| ## 'Does the patient have a history of cancer?'1                         | 0.3513     |
| ## 'Please specify: (choice=Hypertension)'1                              | 0.5003     |
| ## 'Please specify: (choice=Coronary Artery Disease)'1                   | 0.3194     |
| ## 'Please specify: (choice=Congestive Heart Failure)'1                  | 0.1752     |
| ## 'Please specify: (choice=Asthma)'1                                    | 0.2488     |
| ## 'Please specify: (choice=Chronic Obstructive Pulmonary Disease)'1     | 0.2437     |
| ## 'Please specify: (choice=Chronic Renal Insufficiency)'1               | 0.2679     |
| ## 'Please specify: (choice=Cirrhosis)'1                                 | 0.0000     |
| ## 'Did the patient receive hemodialysis during this admission?'1        | 0.2488     |
| ## 'Was plasma given to the patient during this admission?'1             | 0.3050     |
| ## 'Was the patient placed in a prone position during their admission?'1 | 0.3808     |
| ## 'Age at Admission'                                                    | 18.2766    |

|                                                                          |            |
|--------------------------------------------------------------------------|------------|
| ## Per_Capita                                                            | 21937.3362 |
| ## 'SIRS RR'                                                             | 0.4558     |
| ## SIRS_WBC                                                              | 0.4303     |
| ## SIRS...110                                                            | 1.0228     |
| ## 'Creatinine (if 0 = N/A)'                                             | 1.6774     |
| ## 'Admission Date:'                                                     | 12.0162    |
| ## 'Please specify: (choice=Diabetes)'1                                  | 0.4656     |
| ## 'SIRS TEMP'                                                           | 0.4518     |
| ## 'Please specify: (choice=Chronic- Hepatitis C)'1                      | 0.0536     |
| ##                                                                       | Mean Diff  |
| ## distance                                                              | 0.0904     |
| ## 'Insurance Class'COMM                                                 | 0.0201     |
| ## 'Insurance Class'MEDICAID                                             | 0.0086     |
| ## 'Insurance Class'MEDICARE                                             | -0.0374    |
| ## 'Insurance Class'OTHER                                                | 0.0000     |
| ## 'Insurance Class'SP                                                   | 0.0086     |
| ## 'Race:'American Indian/Alaskan Native                                 | 0.0029     |
| ## 'Race:'Asian                                                          | -0.0057    |
| ## 'Race:'Black                                                          | 0.0029     |
| ## 'Race:'Native Hawaiian/Pacific Isle                                   | 0.0000     |
| ## 'Race:'Other                                                          | 0.0144     |
| ## 'Race:'Unknown                                                        | 0.0115     |
| ## 'Does the patient have a history of cancer?'1                         | -0.0057    |
| ## 'Please specify: (choice=Hypertension)'1                              | -0.0029    |
| ## 'Please specify: (choice=Coronary Artery Disease)'1                   | 0.0057     |
| ## 'Please specify: (choice=Congestive Heart Failure)'1                  | 0.0000     |
| ## 'Please specify: (choice=Asthma)'1                                    | -0.0057    |
| ## 'Please specify: (choice=Chronic Obstructive Pulmonary Disease)'1     | -0.0029    |
| ## 'Please specify: (choice=Chronic Renal Insufficiency)'1               | 0.0000     |
| ## 'Please specify: (choice=Cirrhosis)'1                                 | 0.0000     |
| ## 'Did the patient receive hemodialysis during this admission?'1        | 0.0345     |
| ## 'Was plasma given to the patient during this admission?'1             | 0.0460     |
| ## 'Was the patient placed in a prone position during their admission?'1 | 0.1293     |
| ## 'Age at Admission'                                                    | -1.2960    |
| ## Per_Capita                                                            | 60.7098    |
| ## 'SIRS RR'                                                             | 0.0661     |
| ## SIRS_WBC                                                              | -0.0057    |
| ## SIRS...110                                                            | 0.1092     |
| ## 'Creatinine (if 0 = N/A)'                                             | -0.0566    |
| ## 'Admission Date:'                                                     | -1.4195    |
| ## 'Please specify: (choice=Diabetes)'1                                  | 0.0230     |
| ## 'SIRS TEMP'                                                           | 0.0287     |
| ## 'Please specify: (choice=Chronic- Hepatitis C)'1                      | 0.0057     |
| ##                                                                       | eQQ Med    |
| ## distance                                                              | 0.1095     |
| ## 'Insurance Class'COMM                                                 | 0.0000     |
| ## 'Insurance Class'MEDICAID                                             | 0.0000     |
| ## 'Insurance Class'MEDICARE                                             | 0.0000     |
| ## 'Insurance Class'OTHER                                                | 0.0000     |
| ## 'Insurance Class'SP                                                   | 0.0000     |
| ## 'Race:'American Indian/Alaskan Native                                 | 0.0000     |
| ## 'Race:'Asian                                                          | 0.0000     |
| ## 'Race:'Black                                                          | 0.0000     |
| ## 'Race:'Native Hawaiian/Pacific Isle                                   | 0.0000     |

|                                                                          |           |
|--------------------------------------------------------------------------|-----------|
| ## 'Race:'Other                                                          | 0.0000    |
| ## 'Race:'Unknown                                                        | 0.0000    |
| ## 'Does the patient have a history of cancer?'1                         | 0.0000    |
| ## 'Please specify: (choice=Hypertension)'1                              | 0.0000    |
| ## 'Please specify: (choice=Coronary Artery Disease)'1                   | 0.0000    |
| ## 'Please specify: (choice=Congestive Heart Failure)'1                  | 0.0000    |
| ## 'Please specify: (choice=Asthma)'1                                    | 0.0000    |
| ## 'Please specify: (choice=Chronic Obstructive Pulmonary Disease)'1     | 0.0000    |
| ## 'Please specify: (choice=Chronic Renal Insufficiency)'1               | 0.0000    |
| ## 'Please specify: (choice=Cirrhosis)'1                                 | 0.0000    |
| ## 'Did the patient receive hemodialysis during this admission?'1        | 0.0000    |
| ## 'Was plasma given to the patient during this admission?'1             | 0.0000    |
| ## 'Was the patient placed in a prone position during their admission?'1 | 0.0000    |
| ## 'Age at Admission'                                                    | 3.0000    |
| ## Per_Capita                                                            | 113.0000  |
| ## 'SIRS RR'                                                             | 0.0000    |
| ## SIRS_WBC                                                              | 0.0000    |
| ## SIRS...110                                                            | 0.0000    |
| ## 'Creatinine (if 0 = N/A)'                                             | 0.0000    |
| ## 'Admission Date:'                                                     | 1.0000    |
| ## 'Please specify: (choice=Diabetes)'1                                  | 0.0000    |
| ## 'SIRS TEMP'                                                           | 0.0000    |
| ## 'Please specify: (choice=Chronic- Hepatitis C)'1                      | 0.0000    |
| ##                                                                       | eQQ Mean  |
| ## distance                                                              | 0.0904    |
| ## 'Insurance Class'COMM                                                 | 0.0201    |
| ## 'Insurance Class'MEDICAID                                             | 0.0086    |
| ## 'Insurance Class'MEDICARE                                             | 0.0374    |
| ## 'Insurance Class'OTHER                                                | 0.0000    |
| ## 'Insurance Class'SP                                                   | 0.0086    |
| ## 'Race:'American Indian/Alaskan Native                                 | 0.0029    |
| ## 'Race:'Asian                                                          | 0.0057    |
| ## 'Race:'Black                                                          | 0.0029    |
| ## 'Race:'Native Hawaiian/Pacific Isle                                   | 0.0000    |
| ## 'Race:'Other                                                          | 0.0144    |
| ## 'Race:'Unknown                                                        | 0.0115    |
| ## 'Does the patient have a history of cancer?'1                         | 0.0057    |
| ## 'Please specify: (choice=Hypertension)'1                              | 0.0029    |
| ## 'Please specify: (choice=Coronary Artery Disease)'1                   | 0.0057    |
| ## 'Please specify: (choice=Congestive Heart Failure)'1                  | 0.0000    |
| ## 'Please specify: (choice=Asthma)'1                                    | 0.0057    |
| ## 'Please specify: (choice=Chronic Obstructive Pulmonary Disease)'1     | 0.0029    |
| ## 'Please specify: (choice=Chronic Renal Insufficiency)'1               | 0.0000    |
| ## 'Please specify: (choice=Cirrhosis)'1                                 | 0.0000    |
| ## 'Did the patient receive hemodialysis during this admission?'1        | 0.0345    |
| ## 'Was plasma given to the patient during this admission?'1             | 0.0460    |
| ## 'Was the patient placed in a prone position during their admission?'1 | 0.1293    |
| ## 'Age at Admission'                                                    | 3.4741    |
| ## Per_Capita                                                            | 1242.7960 |
| ## 'SIRS RR'                                                             | 0.0661    |
| ## SIRS_WBC                                                              | 0.0057    |
| ## SIRS...110                                                            | 0.1092    |
| ## 'Creatinine (if 0 = N/A)'                                             | 0.1101    |
| ## 'Admission Date:'                                                     | 2.2241    |



|                                                                          |            |
|--------------------------------------------------------------------------|------------|
| ## 'Please specify: (choice=Diabetes)'1                                  | 0.0230     |
| ## 'SIRS TEMP'                                                           | 0.0287     |
| ## 'Please specify: (choice=Chronic- Hepatitis C)'1                      | 0.0057     |
| ##                                                                       | eQQ Max    |
| ## distance                                                              | 0.1429     |
| ## 'Insurance Class'COMM                                                 | 1.0000     |
| ## 'Insurance Class'MEDICAID                                             | 1.0000     |
| ## 'Insurance Class'MEDICARE                                             | 1.0000     |
| ## 'Insurance Class'OTHER                                                | 0.0000     |
| ## 'Insurance Class'SP                                                   | 1.0000     |
| ## 'Race:'American Indian/Alaskan Native                                 | 1.0000     |
| ## 'Race:'Asian                                                          | 1.0000     |
| ## 'Race:'Black                                                          | 1.0000     |
| ## 'Race:'Native Hawaiian/Pacific Isle                                   | 0.0000     |
| ## 'Race:'Other                                                          | 1.0000     |
| ## 'Race:'Unknown                                                        | 1.0000     |
| ## 'Does the patient have a history of cancer?'1                         | 1.0000     |
| ## 'Please specify: (choice=Hypertension)'1                              | 1.0000     |
| ## 'Please specify: (choice=Coronary Artery Disease)'1                   | 1.0000     |
| ## 'Please specify: (choice=Congestive Heart Failure)'1                  | 0.0000     |
| ## 'Please specify: (choice=Asthma)'1                                    | 1.0000     |
| ## 'Please specify: (choice=Chronic Obstructive Pulmonary Disease)'1     | 1.0000     |
| ## 'Please specify: (choice=Chronic Renal Insufficiency)'1               | 0.0000     |
| ## 'Please specify: (choice=Cirrhosis)'1                                 | 0.0000     |
| ## 'Did the patient receive hemodialysis during this admission?'1        | 1.0000     |
| ## 'Was plasma given to the patient during this admission?'1             | 1.0000     |
| ## 'Was the patient placed in a prone position during their admission?'1 | 1.0000     |
| ## 'Age at Admission'                                                    | 10.0000    |
| ## Per_Capita                                                            | 15315.0000 |
| ## 'SIRS RR'                                                             | 1.0000     |
| ## SIRS_WBC                                                              | 1.0000     |
| ## SIRS...110                                                            | 1.0000     |
| ## 'Creatinine (if 0 = N/A)'                                             | 3.5000     |
| ## 'Admission Date:'                                                     | 13.0000    |
| ## 'Please specify: (choice=Diabetes)'1                                  | 1.0000     |
| ## 'SIRS TEMP'                                                           | 1.0000     |
| ## 'Please specify: (choice=Chronic- Hepatitis C)'1                      | 1.0000     |
| ##                                                                       |            |
| ## Percent Balance Improvement:                                          |            |
| ##                                                                       | Mean Diff. |
| ## distance                                                              | 61.6981    |
| ## 'Insurance Class'COMM                                                 | 77.4194    |
| ## 'Insurance Class'MEDICAID                                             | 83.2756    |
| ## 'Insurance Class'MEDICARE                                             | 74.8528    |
| ## 'Insurance Class'OTHER                                                | 100.0000   |
| ## 'Insurance Class'SP                                                   | 9.0395     |
| ## 'Race:'American Indian/Alaskan Native                                 | -163.9344  |
| ## 'Race:'Asian                                                          | -253.8462  |
| ## 'Race:'Black                                                          | 71.0432    |
| ## 'Race:'Native Hawaiian/Pacific Isle                                   | 100.0000   |
| ## 'Race:'Other                                                          | 21.9961    |
| ## 'Race:'Unknown                                                        | -152.5490  |
| ## 'Does the patient have a history of cancer?'1                         | 77.1144    |
| ## 'Please specify: (choice=Hypertension)'1                              | 89.6596    |

|                                                                          |           |
|--------------------------------------------------------------------------|-----------|
| ## 'Please specify: (choice=Coronary Artery Disease)'1                   | 75.7713   |
| ## 'Please specify: (choice=Congestive Heart Failure)'1                  | 100.0000  |
| ## 'Please specify: (choice=Asthma)'1                                    | -17.9487  |
| ## 'Please specify: (choice=Chronic Obstructive Pulmonary Disease)'1     | 86.9106   |
| ## 'Please specify: (choice=Chronic Renal Insufficiency)'1               | 100.0000  |
| ## 'Please specify: (choice=Cirrhosis)'1                                 | 100.0000  |
| ## 'Did the patient receive hemodialysis during this admission?'1        | 27.8297   |
| ## 'Was plasma given to the patient during this admission?'1             | 31.5076   |
| ## 'Was the patient placed in a prone position during their admission?'1 | 31.8310   |
| ## 'Age at Admission'                                                    | 66.7457   |
| ## Per_Capita                                                            | 96.7019   |
| ## 'SIRS RR'                                                             | 49.2114   |
| ## SIRS_WBC                                                              | 55.9508   |
| ## SIRS...110                                                            | 58.1761   |
| ## 'Creatinine (if 0 = N/A)'                                             | 52.8189   |
| ## 'Admission Date:'                                                     | 87.6560   |
| ## 'Please specify: (choice=Diabetes)'1                                  | 27.3138   |
| ## 'SIRS TEMP'                                                           | 71.4032   |
| ## 'Please specify: (choice=Chronic- Hepatitis C)'1                      | -138.5185 |
| ##                                                                       | eQQ Med   |
| ## distance                                                              | 56.5565   |
| ## 'Insurance Class'COMM                                                 | 0.0000    |
| ## 'Insurance Class'MEDICAID                                             | 0.0000    |
| ## 'Insurance Class'MEDICARE                                             | 0.0000    |
| ## 'Insurance Class'OTHER                                                | 0.0000    |
| ## 'Insurance Class'SP                                                   | 0.0000    |
| ## 'Race:'American Indian/Alaskan Native                                 | 0.0000    |
| ## 'Race:'Asian                                                          | 0.0000    |
| ## 'Race:'Black                                                          | 0.0000    |
| ## 'Race:'Native Hawaiian/Pacific Isle                                   | 0.0000    |
| ## 'Race:'Other                                                          | 0.0000    |
| ## 'Race:'Unknown                                                        | 0.0000    |
| ## 'Does the patient have a history of cancer?'1                         | 0.0000    |
| ## 'Please specify: (choice=Hypertension)'1                              | 0.0000    |
| ## 'Please specify: (choice=Coronary Artery Disease)'1                   | 0.0000    |
| ## 'Please specify: (choice=Congestive Heart Failure)'1                  | 0.0000    |
| ## 'Please specify: (choice=Asthma)'1                                    | 0.0000    |
| ## 'Please specify: (choice=Chronic Obstructive Pulmonary Disease)'1     | 0.0000    |
| ## 'Please specify: (choice=Chronic Renal Insufficiency)'1               | 0.0000    |
| ## 'Please specify: (choice=Cirrhosis)'1                                 | 0.0000    |
| ## 'Did the patient receive hemodialysis during this admission?'1        | 0.0000    |
| ## 'Was plasma given to the patient during this admission?'1             | 0.0000    |
| ## 'Was the patient placed in a prone position during their admission?'1 | 0.0000    |
| ## 'Age at Admission'                                                    | 25.0000   |
| ## Per_Capita                                                            | 92.9375   |
| ## 'SIRS RR'                                                             | 0.0000    |
| ## SIRS_WBC                                                              | 0.0000    |
| ## SIRS...110                                                            | 0.0000    |
| ## 'Creatinine (if 0 = N/A)'                                             | 0.0000    |
| ## 'Admission Date:'                                                     | 90.0000   |
| ## 'Please specify: (choice=Diabetes)'1                                  | 0.0000    |
| ## 'SIRS TEMP'                                                           | 0.0000    |
| ## 'Please specify: (choice=Chronic- Hepatitis C)'1                      | 0.0000    |
| ##                                                                       | eQQ Mean  |

|                                                                          |           |
|--------------------------------------------------------------------------|-----------|
| ## distance                                                              | 61.7400   |
| ## 'Insurance Class'COMM                                                 | 77.4194   |
| ## 'Insurance Class'MEDICAID                                             | 83.3333   |
| ## 'Insurance Class'MEDICARE                                             | 74.5098   |
| ## 'Insurance Class'OTHER                                                | 100.0000  |
| ## 'Insurance Class'SP                                                   | 0.0000    |
| ## 'Race:'American Indian/Alaskan Native                                 | -Inf      |
| ## 'Race:'Asian                                                          | -100.0000 |
| ## 'Race:'Black                                                          | 75.0000   |
| ## 'Race:'Native Hawaiian/Pacific Isle                                   | 100.0000  |
| ## 'Race:'Other                                                          | 16.6667   |
| ## 'Race:'Unknown                                                        | -100.0000 |
| ## 'Does the patient have a history of cancer?'1                         | 77.7778   |
| ## 'Please specify: (choice=Hypertension)'1                              | 88.8889   |
| ## 'Please specify: (choice=Coronary Artery Disease)'1                   | 75.0000   |
| ## 'Please specify: (choice=Congestive Heart Failure)'1                  | 100.0000  |
| ## 'Please specify: (choice=Asthma)'1                                    | 0.0000    |
| ## 'Please specify: (choice=Chronic Obstructive Pulmonary Disease)'1     | 87.5000   |
| ## 'Please specify: (choice=Chronic Renal Insufficiency)'1               | 100.0000  |
| ## 'Please specify: (choice=Cirrhosis)'1                                 | 100.0000  |
| ## 'Did the patient receive hemodialysis during this admission?'1        | 29.4118   |
| ## 'Was plasma given to the patient during this admission?'1             | 30.4348   |
| ## 'Was the patient placed in a prone position during their admission?'1 | 31.8182   |
| ## 'Age at Admission'                                                    | 28.1213   |
| ## Per_Capita                                                            | 58.0039   |
| ## 'SIRS RR'                                                             | 50.0000   |
| ## SIRS_WBC                                                              | 50.0000   |
| ## SIRS...110                                                            | 58.6957   |
| ## 'Creatinine (if 0 = N/A)'                                             | 34.9745   |
| ## 'Admission Date:'                                                     | 80.6500   |
| ## 'Please specify: (choice=Diabetes)'1                                  | 27.2727   |
| ## 'SIRS TEMP'                                                           | 71.4286   |
| ## 'Please specify: (choice=Chronic- Hepatitis C)'1                      | -100.0000 |
| ##                                                                       | eQQ Max   |
| ## distance                                                              | 51.1091   |
| ## 'Insurance Class'COMM                                                 | 0.0000    |
| ## 'Insurance Class'MEDICAID                                             | 0.0000    |
| ## 'Insurance Class'MEDICARE                                             | 0.0000    |
| ## 'Insurance Class'OTHER                                                | 100.0000  |
| ## 'Insurance Class'SP                                                   | 0.0000    |
| ## 'Race:'American Indian/Alaskan Native                                 | -Inf      |
| ## 'Race:'Asian                                                          | 0.0000    |
| ## 'Race:'Black                                                          | 0.0000    |
| ## 'Race:'Native Hawaiian/Pacific Isle                                   | 100.0000  |
| ## 'Race:'Other                                                          | 0.0000    |
| ## 'Race:'Unknown                                                        | 0.0000    |
| ## 'Does the patient have a history of cancer?'1                         | 0.0000    |
| ## 'Please specify: (choice=Hypertension)'1                              | 0.0000    |
| ## 'Please specify: (choice=Coronary Artery Disease)'1                   | 0.0000    |
| ## 'Please specify: (choice=Congestive Heart Failure)'1                  | 100.0000  |
| ## 'Please specify: (choice=Asthma)'1                                    | 0.0000    |
| ## 'Please specify: (choice=Chronic Obstructive Pulmonary Disease)'1     | 0.0000    |
| ## 'Please specify: (choice=Chronic Renal Insufficiency)'1               | 100.0000  |
| ## 'Please specify: (choice=Cirrhosis)'1                                 | 100.0000  |

```

## 'Did the patient receive hemodialysis during this admission?'1      0.0000
## 'Was plasma given to the patient during this admission?'1          0.0000
## 'Was the patient placed in a prone position during their admission?'1 0.0000
## 'Age at Admission'                                                0.0000
## Per_Capita                                                         94.1942
## 'SIRS RR'                                                          0.0000
## SIRS_WBC                                                           0.0000
## SIRS...110                                                         0.0000
## 'Creatinine (if 0 = N/A)'                                          -9.3750
## 'Admission Date:'                                                61.7647
## 'Please specify: (choice=Diabetes)'1                                0.0000
## 'SIRS TEMP'                                                        0.0000
## 'Please specify: (choice=Chronic- Hepatitis C)'1                    0.0000
##
## Sample sizes:
##           Control Treated
## All           644    348
## Matched       348    348
## Unmatched     296     0
## Discarded      0     0

```

```

matched.cohort.hcq.2 = get_matches(my.full.match.hcq.2, hcq.select.no.labs.na, id_cols = NULL, newdata =
# is there any differene between the groups
binary.variables.hcq.2 = matched.cohort.hcq.2 %>%
  dplyr::select(Was.plasma.given.to.the.patient.during.this.admission., Does.the.patient.have.a.history)

chi.p.exit.3.hcq.2 = vector()
chi.variable.name.3.hcq.2 = vector()

for ( i in c(1:8,10:11, 13:ncol(binary.variables.hcq.2))) { # cirrhosis
  variable.1 = binary.variables.hcq.2[[i]][binary.variables.hcq.2$COVID..Was.hydroxychloroquine..Plaque
  variable.0 = binary.variables.hcq.2[[i]][binary.variables.hcq.2$COVID..Was.hydroxychloroquine..Plaque
  chisquare.test = chisq.test(variable.1, variable.0)
  chisquare.test.p.value = chisquare.test$p.value
  chi.p.exit.3.hcq.2[i] = chisquare.test.p.value
  chi.variable.name.3.hcq.2[i] = colnames(binary.variables.hcq.2)[i]
}

```

```

## Warning in chisq.test(variable.1, variable.0): Chi-squared approximation may be
## incorrect

```

```

## Warning in chisq.test(variable.1, variable.0): Chi-squared approximation may be
## incorrect

```

```

## Warning in chisq.test(variable.1, variable.0): Chi-squared approximation may be
## incorrect

```

```

## Warning in chisq.test(variable.1, variable.0): Chi-squared approximation may be
## incorrect

```

```

## Warning in chisq.test(variable.1, variable.0): Chi-squared approximation may be
## incorrect

```

```
## Warning in chisq.test(variable.1, variable.0): Chi-squared approximation may be
## incorrect
```

```
## Warning in chisq.test(variable.1, variable.0): Chi-squared approximation may be
## incorrect
```

```
## Warning in chisq.test(variable.1, variable.0): Chi-squared approximation may be
## incorrect
```

```
## Warning in chisq.test(variable.1, variable.0): Chi-squared approximation may be
## incorrect
```

```
chi.df.3.hcq.2 = data.frame(chi.variable.name.3.hcq.2, chi.p.exit.3.hcq.2) # prone diff
```

```
numerical.variables.hcq.2 = matched.cohort.hcq.2 %>%
```

```
  dplyr::select(COVID..Was.hydroxychloroquine..Plaquenil..given.during.the.patient.s.admission., Age.at
```

```
p.value.exit.3.hcq.2 = vector()
```

```
variable.name.exit.3.hcq.2 = vector()
```

```
for ( i in c(2:7, 9:ncol(numerical.variables.hcq.2))) { # first column is hcq # skip date
```

```
  variable.1 = numerical.variables.hcq.2[[i]][numerical.variables.hcq.2$COVID..Was.hydroxychloroquine..
```

```
  variable.0 = numerical.variables.hcq.2[[i]][numerical.variables.hcq.2$COVID..Was.hydroxychloroquine..
```

```
  middle.t.test = t.test(variable.1, variable.0)
```

```
  t.test.p.value = middle.t.test$p.value
```

```
  p.value.exit.3.hcq.2[i] = t.test.p.value
```

```
  variable.name.exit.3.hcq.2[i] = colnames(numerical.variables.hcq.2)[i]
```

```
}
```

```
t.test.df.hcq.3 = data.frame(variable.name.exit.3.hcq.2, p.value.exit.3.hcq.2) # sirs rr diff
```

```
match.hcq.2.glm = glm(death ~ COVID..Was.hydroxychloroquine..Plaquenil..given.during.the.patient.s.admi
```

```
match.hcq.2.summary = summary(match.hcq.2.glm) # p = 3.36e-06 ss = 696
```

```
match.hcq.2.conf.intervals = exp(cbind(coef(match.hcq.2.glm), confint(match.hcq.2.glm))) # 2.2775330 1.
```

```
## Waiting for profiling to be done...
```

```
## hcq with sirs of 2 or more
```

```
hcq.data.sirs.2 = hcq.data %>%
```

```
  filter(SIRS...110 >= 2)
```

```
hcq.simple.glm.sirs.2 = glm(death ~ 'COVID- Was hydroxychloroquine (Plaquenil) given during the patient
```

```
hcq.simple.summary.sirs.2 = summary(hcq.simple.glm.sirs.2) #p = 0.000321
```

```
hcq.simple.conf.intervals.sirs.2 = exp(cbind(coef(hcq.simple.glm.sirs.2), confint(hcq.simple.glm.sirs.2
```

```
## Waiting for profiling to be done...
```

```
hcq.select.sirs.2 = hcq.data.sirs.2 %>%
```

```
  dplyr::select('REDCap Record ID', 'Insurance Class', 'Race:', 'Does the patient have a history of can
```

```
hcq.select.na.sirs.2.na = na.omit(hcq.select.sirs.2) # 214 labs sirs 2
```

```
hcq.select.no.labs.sirs.2 = subset(hcq.select.sirs.2, select = - c(Ferritin, CRP, 'D-Domer'))
hcq.select.no.labs.na.sirs.2 = na.omit(hcq.select.no.labs.sirs.2) # 597 no labs sirs 2
```

```
# sirs greater than 2 smaller sample size with labs
```

```
row.names(hcq.select.na.sirs.2.na) <- 1:nrow(hcq.select.na.sirs.2.na)
```

```
my.hcq.match.sirs.2 = matchit('COVID- Was hydroxychloroquine (Plaquenil) given during the patient's adm
summary(my.hcq.match.sirs.2)
```

```
##
```

```
## Call:
```

```
## matchit(formula = 'COVID- Was hydroxychloroquine (Plaquenil) given during the patient's admission?' +
## 'Insurance Class' + 'Race:' + 'Does the patient have a history of cancer?' +
## 'Please specify: (choice=Hypertension)' + 'Please specify: (choice=Coronary Artery Disease)' +
## 'Please specify: (choice=Congestive Heart Failure)' +
## 'Please specify: (choice=Asthma)' + 'Please specify: (choice=Chronic Obstructive Pulmonary D
## 'Please specify: (choice=Chronic Renal Insufficiency)' +
## 'Please specify: (choice=Cirrhosis)' + 'Did the patient receive hemodialysis during this adm
## 'Was plasma given to the patient during this admission?' +
## 'Was the patient placed in a prone position during their admission?' +
## 'Was plasma given to the patient during this admission?' +
## 'Age at Admission' + Per_Capita + 'SIRS RR' + SIRS_WBC +
## SIRS...110 + 'Creatinine (if 0 = N/A)' + Ferritin + CRP +
## 'D-Domer' + 'Admission Date:' + 'Please specify: (choice=Diabetes)' +
## 'SIRS TEMP' + 'Please specify: (choice=Chronic- Hepatitis C)',
## data = hcq.select.na.sirs.2.na, method = "nearest")
##
```

```
## Summary of balance for all data:
```

|                                                                          | Means Treated |
|--------------------------------------------------------------------------|---------------|
| ## distance                                                              | 0.6182        |
| ## 'Insurance Class'COMM                                                 | 0.3333        |
| ## 'Insurance Class'MEDICAID                                             | 0.2667        |
| ## 'Insurance Class'MEDICARE                                             | 0.3778        |
| ## 'Insurance Class'OTHER                                                | 0.0000        |
| ## 'Insurance Class'SP                                                   | 0.0222        |
| ## 'Race:'American Indian/Alaskan Native                                 | 0.0000        |
| ## 'Race:'Asian                                                          | 0.0333        |
| ## 'Race:'Black                                                          | 0.2111        |
| ## 'Race:'Native Hawaiian/Pacific Isle                                   | 0.0000        |
| ## 'Race:'Other                                                          | 0.0667        |
| ## 'Race:'Unknown                                                        | 0.1889        |
| ## 'Does the patient have a history of cancer?'1                         | 0.1111        |
| ## 'Please specify: (choice=Hypertension)'1                              | 0.5778        |
| ## 'Please specify: (choice=Coronary Artery Disease)'1                   | 0.1000        |
| ## 'Please specify: (choice=Congestive Heart Failure)'1                  | 0.0222        |
| ## 'Please specify: (choice=Asthma)'1                                    | 0.0889        |
| ## 'Please specify: (choice=Chronic Obstructive Pulmonary Disease)'1     | 0.0667        |
| ## 'Please specify: (choice=Chronic Renal Insufficiency)'1               | 0.0667        |
| ## 'Please specify: (choice=Cirrhosis)'1                                 | 0.0000        |
| ## 'Did the patient receive hemodialysis during this admission?'1        | 0.1222        |
| ## 'Was plasma given to the patient during this admission?'1             | 0.2333        |
| ## 'Was the patient placed in a prone position during their admission?'1 | 0.3889        |
| ## 'Age at Admission'                                                    | 61.4667       |

|                                                                          |               |
|--------------------------------------------------------------------------|---------------|
| ## Per_Capita                                                            | 49196.2889    |
| ## 'SIRS RR'                                                             | 0.9222        |
| ## SIRS_WBC                                                              | 0.2000        |
| ## SIRS...110                                                            | 2.4889        |
| ## 'Creatinine (if 0 = N/A)'                                             | 1.2767        |
| ## Ferritin                                                              | 757.9444      |
| ## CRP                                                                   | 161.3878      |
| ## 'D-Domer'                                                             | 7055.2556     |
| ## 'Admission Date:'                                                     | 18358.8556    |
| ## 'Please specify: (choice=Diabetes)'1                                  | 0.3778        |
| ## 'SIRS TEMP'                                                           | 0.4333        |
| ## 'Please specify: (choice=Chronic- Hepatitis C)'1                      | 0.0111        |
| ##                                                                       | Means Control |
| ## distance                                                              | 0.2771        |
| ## 'Insurance Class'COMM                                                 | 0.3145        |
| ## 'Insurance Class'MEDICAID                                             | 0.2661        |
| ## 'Insurance Class'MEDICARE                                             | 0.4032        |
| ## 'Insurance Class'OTHER                                                | 0.0000        |
| ## 'Insurance Class'SP                                                   | 0.0161        |
| ## 'Race:'American Indian/Alaskan Native                                 | 0.0081        |
| ## 'Race:'Asian                                                          | 0.0161        |
| ## 'Race:'Black                                                          | 0.1935        |
| ## 'Race:'Native Hawaiian/Pacific Isle                                   | 0.0000        |
| ## 'Race:'Other                                                          | 0.0403        |
| ## 'Race:'Unknown                                                        | 0.2016        |
| ## 'Does the patient have a history of cancer?'1                         | 0.1613        |
| ## 'Please specify: (choice=Hypertension)'1                              | 0.4597        |
| ## 'Please specify: (choice=Coronary Artery Disease)'1                   | 0.0806        |
| ## 'Please specify: (choice=Congestive Heart Failure)'1                  | 0.0161        |
| ## 'Please specify: (choice=Asthma)'1                                    | 0.1129        |
| ## 'Please specify: (choice=Chronic Obstructive Pulmonary Disease)'1     | 0.0403        |
| ## 'Please specify: (choice=Chronic Renal Insufficiency)'1               | 0.0242        |
| ## 'Please specify: (choice=Cirrhosis)'1                                 | 0.0081        |
| ## 'Did the patient receive hemodialysis during this admission?'1        | 0.0403        |
| ## 'Was plasma given to the patient during this admission?'1             | 0.1855        |
| ## 'Was the patient placed in a prone position during their admission?'1 | 0.2097        |
| ## 'Age at Admission'                                                    | 62.5161       |
| ## Per_Capita                                                            | 49730.3145    |
| ## 'SIRS RR'                                                             | 0.8871        |
| ## SIRS_WBC                                                              | 0.2903        |
| ## SIRS...110                                                            | 2.3871        |
| ## 'Creatinine (if 0 = N/A)'                                             | 0.9790        |
| ## Ferritin                                                              | 651.1855      |
| ## CRP                                                                   | 129.8073      |
| ## 'D-Domer'                                                             | 4096.8710     |
| ## 'Admission Date:'                                                     | 18371.4919    |
| ## 'Please specify: (choice=Diabetes)'1                                  | 0.2984        |
| ## 'SIRS TEMP'                                                           | 0.3145        |
| ## 'Please specify: (choice=Chronic- Hepatitis C)'1                      | 0.0000        |
| ##                                                                       | SD Control    |
| ## distance                                                              | 0.2320        |
| ## 'Insurance Class'COMM                                                 | 0.4662        |
| ## 'Insurance Class'MEDICAID                                             | 0.4437        |
| ## 'Insurance Class'MEDICARE                                             | 0.4925        |

|                                                                          |            |
|--------------------------------------------------------------------------|------------|
| ## 'Insurance Class'OTHER                                                | 0.0000     |
| ## 'Insurance Class'SP                                                   | 0.1265     |
| ## 'Race:'American Indian/Alaskan Native                                 | 0.0898     |
| ## 'Race:'Asian                                                          | 0.1265     |
| ## 'Race:'Black                                                          | 0.3967     |
| ## 'Race:'Native Hawaiian/Pacific Isle                                   | 0.0000     |
| ## 'Race:'Other                                                          | 0.1975     |
| ## 'Race:'Unknown                                                        | 0.4028     |
| ## 'Does the patient have a history of cancer?'1                         | 0.3693     |
| ## 'Please specify: (choice=Hypertension)'1                              | 0.5004     |
| ## 'Please specify: (choice=Coronary Artery Disease)'1                   | 0.2734     |
| ## 'Please specify: (choice=Congestive Heart Failure)'1                  | 0.1265     |
| ## 'Please specify: (choice=Asthma)'1                                    | 0.3178     |
| ## 'Please specify: (choice=Chronic Obstructive Pulmonary Disease)'1     | 0.1975     |
| ## 'Please specify: (choice=Chronic Renal Insufficiency)'1               | 0.1543     |
| ## 'Please specify: (choice=Cirrhosis)'1                                 | 0.0898     |
| ## 'Did the patient receive hemodialysis during this admission?'1        | 0.1975     |
| ## 'Was plasma given to the patient during this admission?'1             | 0.3903     |
| ## 'Was the patient placed in a prone position during their admission?'1 | 0.4087     |
| ## 'Age at Admission'                                                    | 17.0635    |
| ## Per_Capita                                                            | 20960.2987 |
| ## 'SIRS RR'                                                             | 0.3178     |
| ## SIRS_WBC                                                              | 0.4558     |
| ## SIRS...110                                                            | 0.5661     |
| ## 'Creatinine (if 0 = N/A)'                                             | 0.8738     |
| ## Ferritin                                                              | 485.2778   |
| ## CRP                                                                   | 97.8496    |
| ## 'D-Domer'                                                             | 10562.1701 |
| ## 'Admission Date:'                                                     | 14.5817    |
| ## 'Please specify: (choice=Diabetes)'1                                  | 0.4594     |
| ## 'SIRS TEMP'                                                           | 0.4662     |
| ## 'Please specify: (choice=Chronic- Hepatitis C)'1                      | 0.0000     |
| ##                                                                       | Mean Diff  |
| ## distance                                                              | 0.3411     |
| ## 'Insurance Class'COMM                                                 | 0.0188     |
| ## 'Insurance Class'MEDICAID                                             | 0.0005     |
| ## 'Insurance Class'MEDICARE                                             | -0.0254    |
| ## 'Insurance Class'OTHER                                                | 0.0000     |
| ## 'Insurance Class'SP                                                   | 0.0061     |
| ## 'Race:'American Indian/Alaskan Native                                 | -0.0081    |
| ## 'Race:'Asian                                                          | 0.0172     |
| ## 'Race:'Black                                                          | 0.0176     |
| ## 'Race:'Native Hawaiian/Pacific Isle                                   | 0.0000     |
| ## 'Race:'Other                                                          | 0.0263     |
| ## 'Race:'Unknown                                                        | -0.0127    |
| ## 'Does the patient have a history of cancer?'1                         | -0.0502    |
| ## 'Please specify: (choice=Hypertension)'1                              | 0.1181     |
| ## 'Please specify: (choice=Coronary Artery Disease)'1                   | 0.0194     |
| ## 'Please specify: (choice=Congestive Heart Failure)'1                  | 0.0061     |
| ## 'Please specify: (choice=Asthma)'1                                    | -0.0240    |
| ## 'Please specify: (choice=Chronic Obstructive Pulmonary Disease)'1     | 0.0263     |
| ## 'Please specify: (choice=Chronic Renal Insufficiency)'1               | 0.0425     |
| ## 'Please specify: (choice=Cirrhosis)'1                                 | -0.0081    |
| ## 'Did the patient receive hemodialysis during this admission?'1        | 0.0819     |



|                                                                          |           |
|--------------------------------------------------------------------------|-----------|
| ## 'Was plasma given to the patient during this admission?'1             | 0.0478    |
| ## 'Was the patient placed in a prone position during their admission?'1 | 0.1792    |
| ## 'Age at Admission'                                                    | -1.0495   |
| ## Per_Capita                                                            | -534.0256 |
| ## 'SIRS RR'                                                             | 0.0351    |
| ## SIRS_WBC                                                              | -0.0903   |
| ## SIRS...110                                                            | 0.1018    |
| ## 'Creatinine (if 0 = N/A)'                                             | 0.2976    |
| ## Ferritin                                                              | 106.7590  |
| ## CRP                                                                   | 31.5805   |
| ## 'D-Domer'                                                             | 2958.3846 |
| ## 'Admission Date:'                                                     | -12.6364  |
| ## 'Please specify: (choice=Diabetes)'1                                  | 0.0794    |
| ## 'SIRS TEMP'                                                           | 0.1188    |
| ## 'Please specify: (choice=Chronic- Hepatitis C)'1                      | 0.0111    |
| ##                                                                       | eQQ Med   |
| ## distance                                                              | 0.3754    |
| ## 'Insurance Class'COMM                                                 | 0.0000    |
| ## 'Insurance Class'MEDICAID                                             | 0.0000    |
| ## 'Insurance Class'MEDICARE                                             | 0.0000    |
| ## 'Insurance Class'OTHER                                                | 0.0000    |
| ## 'Insurance Class'SP                                                   | 0.0000    |
| ## 'Race:'American Indian/Alaskan Native                                 | 0.0000    |
| ## 'Race:'Asian                                                          | 0.0000    |
| ## 'Race:'Black                                                          | 0.0000    |
| ## 'Race:'Native Hawaiian/Pacific Isle                                   | 0.0000    |
| ## 'Race:'Other                                                          | 0.0000    |
| ## 'Race:'Unknown                                                        | 0.0000    |
| ## 'Does the patient have a history of cancer?'1                         | 0.0000    |
| ## 'Please specify: (choice=Hypertension)'1                              | 0.0000    |
| ## 'Please specify: (choice=Coronary Artery Disease)'1                   | 0.0000    |
| ## 'Please specify: (choice=Congestive Heart Failure)'1                  | 0.0000    |
| ## 'Please specify: (choice=Asthma)'1                                    | 0.0000    |
| ## 'Please specify: (choice=Chronic Obstructive Pulmonary Disease)'1     | 0.0000    |
| ## 'Please specify: (choice=Chronic Renal Insufficiency)'1               | 0.0000    |
| ## 'Please specify: (choice=Cirrhosis)'1                                 | 0.0000    |
| ## 'Did the patient receive hemodialysis during this admission?'1        | 0.0000    |
| ## 'Was plasma given to the patient during this admission?'1             | 0.0000    |
| ## 'Was the patient placed in a prone position during their admission?'1 | 0.0000    |
| ## 'Age at Admission'                                                    | 2.0000    |
| ## Per_Capita                                                            | 2812.0000 |
| ## 'SIRS RR'                                                             | 0.0000    |
| ## SIRS_WBC                                                              | 0.0000    |
| ## SIRS...110                                                            | 0.0000    |
| ## 'Creatinine (if 0 = N/A)'                                             | 0.1000    |
| ## Ferritin                                                              | 139.0000  |
| ## CRP                                                                   | 39.9500   |
| ## 'D-Domer'                                                             | 117.0000  |
| ## 'Admission Date:'                                                     | 14.0000   |
| ## 'Please specify: (choice=Diabetes)'1                                  | 0.0000    |
| ## 'SIRS TEMP'                                                           | 0.0000    |
| ## 'Please specify: (choice=Chronic- Hepatitis C)'1                      | 0.0000    |
| ##                                                                       | eQQ Mean  |
| ## distance                                                              | 0.3438    |

|                                                                          |           |
|--------------------------------------------------------------------------|-----------|
| ## 'Insurance Class'COMM                                                 | 0.0222    |
| ## 'Insurance Class'MEDICAID                                             | 0.0000    |
| ## 'Insurance Class'MEDICARE                                             | 0.0222    |
| ## 'Insurance Class'OTHER                                                | 0.0000    |
| ## 'Insurance Class'SP                                                   | 0.0111    |
| ## 'Race:'American Indian/Alaskan Native                                 | 0.0111    |
| ## 'Race:'Asian                                                          | 0.0222    |
| ## 'Race:'Black                                                          | 0.0222    |
| ## 'Race:'Native Hawaiian/Pacific Isle                                   | 0.0000    |
| ## 'Race:'Other                                                          | 0.0333    |
| ## 'Race:'Unknown                                                        | 0.0111    |
| ## 'Does the patient have a history of cancer?'1                         | 0.0444    |
| ## 'Please specify: (choice=Hypertension)'1                              | 0.1222    |
| ## 'Please specify: (choice=Coronary Artery Disease)'1                   | 0.0222    |
| ## 'Please specify: (choice=Congestive Heart Failure)'1                  | 0.0111    |
| ## 'Please specify: (choice=Asthma)'1                                    | 0.0222    |
| ## 'Please specify: (choice=Chronic Obstructive Pulmonary Disease)'1     | 0.0333    |
| ## 'Please specify: (choice=Chronic Renal Insufficiency)'1               | 0.0444    |
| ## 'Please specify: (choice=Cirrhosis)'1                                 | 0.0111    |
| ## 'Did the patient receive hemodialysis during this admission?'1        | 0.0889    |
| ## 'Was plasma given to the patient during this admission?'1             | 0.0556    |
| ## 'Was the patient placed in a prone position during their admission?'1 | 0.1778    |
| ## 'Age at Admission'                                                    | 3.2889    |
| ## Per_Capita                                                            | 3584.0889 |
| ## 'SIRS RR'                                                             | 0.0444    |
| ## SIRS_WBC                                                              | 0.0889    |
| ## SIRS...110                                                            | 0.1111    |
| ## 'Creatinine (if 0 = N/A)'                                             | 0.2933    |
| ## Ferritin                                                              | 137.0667  |
| ## CRP                                                                   | 38.6989   |
| ## 'D-Domer'                                                             | 3035.6889 |
| ## 'Admission Date:'                                                     | 12.4222   |
| ## 'Please specify: (choice=Diabetes)'1                                  | 0.0778    |
| ## 'SIRS TEMP'                                                           | 0.1222    |
| ## 'Please specify: (choice=Chronic- Hepatitis C)'1                      | 0.0111    |
| ##                                                                       | eQQ Max   |
| ## distance                                                              | 0.4655    |
| ## 'Insurance Class'COMM                                                 | 1.0000    |
| ## 'Insurance Class'MEDICAID                                             | 0.0000    |
| ## 'Insurance Class'MEDICARE                                             | 1.0000    |
| ## 'Insurance Class'OTHER                                                | 0.0000    |
| ## 'Insurance Class'SP                                                   | 1.0000    |
| ## 'Race:'American Indian/Alaskan Native                                 | 1.0000    |
| ## 'Race:'Asian                                                          | 1.0000    |
| ## 'Race:'Black                                                          | 1.0000    |
| ## 'Race:'Native Hawaiian/Pacific Isle                                   | 0.0000    |
| ## 'Race:'Other                                                          | 1.0000    |
| ## 'Race:'Unknown                                                        | 1.0000    |
| ## 'Does the patient have a history of cancer?'1                         | 1.0000    |
| ## 'Please specify: (choice=Hypertension)'1                              | 1.0000    |
| ## 'Please specify: (choice=Coronary Artery Disease)'1                   | 1.0000    |
| ## 'Please specify: (choice=Congestive Heart Failure)'1                  | 1.0000    |
| ## 'Please specify: (choice=Asthma)'1                                    | 1.0000    |
| ## 'Please specify: (choice=Chronic Obstructive Pulmonary Disease)'1     | 1.0000    |

|                                                                          |               |
|--------------------------------------------------------------------------|---------------|
| ## 'Please specify: (choice=Chronic Renal Insufficiency)'1               | 1.0000        |
| ## 'Please specify: (choice=Cirrhosis)'1                                 | 1.0000        |
| ## 'Did the patient receive hemodialysis during this admission?'1        | 1.0000        |
| ## 'Was plasma given to the patient during this admission?'1             | 1.0000        |
| ## 'Was the patient placed in a prone position during their admission?'1 | 1.0000        |
| ## 'Age at Admission'                                                    | 10.0000       |
| ## Per_Capita                                                            | 19521.0000    |
| ## 'SIRS RR'                                                             | 1.0000        |
| ## SIRS_WBC                                                              | 1.0000        |
| ## SIRS...110                                                            | 1.0000        |
| ## 'Creatinine (if 0 = N/A)'                                             | 5.6000        |
| ## Ferritin                                                              | 1138.0000     |
| ## CRP                                                                   | 90.5000       |
| ## 'D-Domer'                                                             | 70326.0000    |
| ## 'Admission Date:'                                                     | 36.0000       |
| ## 'Please specify: (choice=Diabetes)'1                                  | 1.0000        |
| ## 'SIRS TEMP'                                                           | 1.0000        |
| ## 'Please specify: (choice=Chronic- Hepatitis C)'1                      | 1.0000        |
| ##                                                                       |               |
| ##                                                                       |               |
| ## Summary of balance for matched data:                                  |               |
| ##                                                                       | Means Treated |
| ## distance                                                              | 0.6182        |
| ## 'Insurance Class'COMM                                                 | 0.3333        |
| ## 'Insurance Class'MEDICAID                                             | 0.2667        |
| ## 'Insurance Class'MEDICARE                                             | 0.3778        |
| ## 'Insurance Class'OTHER                                                | 0.0000        |
| ## 'Insurance Class'SP                                                   | 0.0222        |
| ## 'Race:'American Indian/Alaskan Native                                 | 0.0000        |
| ## 'Race:'Asian                                                          | 0.0333        |
| ## 'Race:'Black                                                          | 0.2111        |
| ## 'Race:'Native Hawaiian/Pacific Isle                                   | 0.0000        |
| ## 'Race:'Other                                                          | 0.0667        |
| ## 'Race:'Unknown                                                        | 0.1889        |
| ## 'Does the patient have a history of cancer?'1                         | 0.1111        |
| ## 'Please specify: (choice=Hypertension)'1                              | 0.5778        |
| ## 'Please specify: (choice=Coronary Artery Disease)'1                   | 0.1000        |
| ## 'Please specify: (choice=Congestive Heart Failure)'1                  | 0.0222        |
| ## 'Please specify: (choice=Asthma)'1                                    | 0.0889        |
| ## 'Please specify: (choice=Chronic Obstructive Pulmonary Disease)'1     | 0.0667        |
| ## 'Please specify: (choice=Chronic Renal Insufficiency)'1               | 0.0667        |
| ## 'Please specify: (choice=Cirrhosis)'1                                 | 0.0000        |
| ## 'Did the patient receive hemodialysis during this admission?'1        | 0.1222        |
| ## 'Was plasma given to the patient during this admission?'1             | 0.2333        |
| ## 'Was the patient placed in a prone position during their admission?'1 | 0.3889        |
| ## 'Age at Admission'                                                    | 61.4667       |
| ## Per_Capita                                                            | 49196.2889    |
| ## 'SIRS RR'                                                             | 0.9222        |
| ## SIRS_WBC                                                              | 0.2000        |
| ## SIRS...110                                                            | 2.4889        |
| ## 'Creatinine (if 0 = N/A)'                                             | 1.2767        |
| ## Ferritin                                                              | 757.9444      |
| ## CRP                                                                   | 161.3878      |
| ## 'D-Domer'                                                             | 7055.2556     |

|                                                                          |               |
|--------------------------------------------------------------------------|---------------|
| ## 'Admission Date:'                                                     | 18358.8556    |
| ## 'Please specify: (choice=Diabetes)'1                                  | 0.3778        |
| ## 'SIRS TEMP'                                                           | 0.4333        |
| ## 'Please specify: (choice=Chronic- Hepatitis C)'1                      | 0.0111        |
| ##                                                                       | Means Control |
| ## distance                                                              | 0.3665        |
| ## 'Insurance Class'COMM                                                 | 0.3222        |
| ## 'Insurance Class'MEDICAID                                             | 0.3333        |
| ## 'Insurance Class'MEDICARE                                             | 0.3222        |
| ## 'Insurance Class'OTHER                                                | 0.0000        |
| ## 'Insurance Class'SP                                                   | 0.0222        |
| ## 'Race:'American Indian/Alaskan Native                                 | 0.0000        |
| ## 'Race:'Asian                                                          | 0.0111        |
| ## 'Race:'Black                                                          | 0.2111        |
| ## 'Race:'Native Hawaiian/Pacific Isle                                   | 0.0000        |
| ## 'Race:'Other                                                          | 0.0556        |
| ## 'Race:'Unknown                                                        | 0.2222        |
| ## 'Does the patient have a history of cancer?'1                         | 0.1222        |
| ## 'Please specify: (choice=Hypertension)'1                              | 0.4778        |
| ## 'Please specify: (choice=Coronary Artery Disease)'1                   | 0.0889        |
| ## 'Please specify: (choice=Congestive Heart Failure)'1                  | 0.0222        |
| ## 'Please specify: (choice=Asthma)'1                                    | 0.1333        |
| ## 'Please specify: (choice=Chronic Obstructive Pulmonary Disease)'1     | 0.0444        |
| ## 'Please specify: (choice=Chronic Renal Insufficiency)'1               | 0.0222        |
| ## 'Please specify: (choice=Cirrhosis)'1                                 | 0.0000        |
| ## 'Did the patient receive hemodialysis during this admission?'1        | 0.0556        |
| ## 'Was plasma given to the patient during this admission?'1             | 0.1778        |
| ## 'Was the patient placed in a prone position during their admission?'1 | 0.2333        |
| ## 'Age at Admission'                                                    | 59.6333       |
| ## Per_Capita                                                            | 47959.1444    |
| ## 'SIRS RR'                                                             | 0.9333        |
| ## SIRS_WBC                                                              | 0.2222        |
| ## SIRS...110                                                            | 2.4889        |
| ## 'Creatinine (if 0 = N/A)'                                             | 0.9511        |
| ## Ferritin                                                              | 671.0889      |
| ## CRP                                                                   | 144.6356      |
| ## 'D-Domer'                                                             | 4077.9222     |
| ## 'Admission Date:'                                                     | 18366.1889    |
| ## 'Please specify: (choice=Diabetes)'1                                  | 0.3000        |
| ## 'SIRS TEMP'                                                           | 0.3778        |
| ## 'Please specify: (choice=Chronic- Hepatitis C)'1                      | 0.0000        |
| ##                                                                       | SD Control    |
| ## distance                                                              | 0.2113        |
| ## 'Insurance Class'COMM                                                 | 0.4699        |
| ## 'Insurance Class'MEDICAID                                             | 0.4740        |
| ## 'Insurance Class'MEDICARE                                             | 0.4699        |
| ## 'Insurance Class'OTHER                                                | 0.0000        |
| ## 'Insurance Class'SP                                                   | 0.1482        |
| ## 'Race:'American Indian/Alaskan Native                                 | 0.0000        |
| ## 'Race:'Asian                                                          | 0.1054        |
| ## 'Race:'Black                                                          | 0.4104        |
| ## 'Race:'Native Hawaiian/Pacific Isle                                   | 0.0000        |
| ## 'Race:'Other                                                          | 0.2303        |
| ## 'Race:'Unknown                                                        | 0.4181        |

|                                                                          |            |
|--------------------------------------------------------------------------|------------|
| ## 'Does the patient have a history of cancer?'1                         | 0.3294     |
| ## 'Please specify: (choice=Hypertension)'1                              | 0.5023     |
| ## 'Please specify: (choice=Coronary Artery Disease)'1                   | 0.2862     |
| ## 'Please specify: (choice=Congestive Heart Failure)'1                  | 0.1482     |
| ## 'Please specify: (choice=Asthma)'1                                    | 0.3418     |
| ## 'Please specify: (choice=Chronic Obstructive Pulmonary Disease)'1     | 0.2072     |
| ## 'Please specify: (choice=Chronic Renal Insufficiency)'1               | 0.1482     |
| ## 'Please specify: (choice=Cirrhosis)'1                                 | 0.0000     |
| ## 'Did the patient receive hemodialysis during this admission?'1        | 0.2303     |
| ## 'Was plasma given to the patient during this admission?'1             | 0.3845     |
| ## 'Was the patient placed in a prone position during their admission?'1 | 0.4253     |
| ## 'Age at Admission'                                                    | 16.4121    |
| ## Per_Capita                                                            | 19986.9225 |
| ## 'SIRS RR'                                                             | 0.2508     |
| ## SIRS_WBC                                                              | 0.4181     |
| ## SIRS...110                                                            | 0.6042     |
| ## 'Creatinine (if 0 = N/A)'                                             | 0.9252     |
| ## Ferritin                                                              | 484.6926   |
| ## CRP                                                                   | 100.1406   |
| ## 'D-Domer'                                                             | 11599.7511 |
| ## 'Admission Date:'                                                     | 11.8558    |
| ## 'Please specify: (choice=Diabetes)'1                                  | 0.4608     |
| ## 'SIRS TEMP'                                                           | 0.4875     |
| ## 'Please specify: (choice=Chronic- Hepatitis C)'1                      | 0.0000     |
| ##                                                                       | Mean Diff  |
| ## distance                                                              | 0.2517     |
| ## 'Insurance Class'COMM                                                 | 0.0111     |
| ## 'Insurance Class'MEDICAID                                             | -0.0667    |
| ## 'Insurance Class'MEDICARE                                             | 0.0556     |
| ## 'Insurance Class'OTHER                                                | 0.0000     |
| ## 'Insurance Class'SP                                                   | 0.0000     |
| ## 'Race:'American Indian/Alaskan Native                                 | 0.0000     |
| ## 'Race:'Asian                                                          | 0.0222     |
| ## 'Race:'Black                                                          | 0.0000     |
| ## 'Race:'Native Hawaiian/Pacific Isle                                   | 0.0000     |
| ## 'Race:'Other                                                          | 0.0111     |
| ## 'Race:'Unknown                                                        | -0.0333    |
| ## 'Does the patient have a history of cancer?'1                         | -0.0111    |
| ## 'Please specify: (choice=Hypertension)'1                              | 0.1000     |
| ## 'Please specify: (choice=Coronary Artery Disease)'1                   | 0.0111     |
| ## 'Please specify: (choice=Congestive Heart Failure)'1                  | 0.0000     |
| ## 'Please specify: (choice=Asthma)'1                                    | -0.0444    |
| ## 'Please specify: (choice=Chronic Obstructive Pulmonary Disease)'1     | 0.0222     |
| ## 'Please specify: (choice=Chronic Renal Insufficiency)'1               | 0.0444     |
| ## 'Please specify: (choice=Cirrhosis)'1                                 | 0.0000     |
| ## 'Did the patient receive hemodialysis during this admission?'1        | 0.0667     |
| ## 'Was plasma given to the patient during this admission?'1             | 0.0556     |
| ## 'Was the patient placed in a prone position during their admission?'1 | 0.1556     |
| ## 'Age at Admission'                                                    | 1.8333     |
| ## Per_Capita                                                            | 1237.1444  |
| ## 'SIRS RR'                                                             | -0.0111    |
| ## SIRS_WBC                                                              | -0.0222    |
| ## SIRS...110                                                            | 0.0000     |
| ## 'Creatinine (if 0 = N/A)'                                             | 0.3256     |

|                                                                          |           |
|--------------------------------------------------------------------------|-----------|
| ## Ferritin                                                              | 86.8556   |
| ## CRP                                                                   | 16.7522   |
| ## 'D-Dimer'                                                             | 2977.3333 |
| ## 'Admission Date:'                                                     | -7.3333   |
| ## 'Please specify: (choice=Diabetes)'1                                  | 0.0778    |
| ## 'SIRS TEMP'                                                           | 0.0556    |
| ## 'Please specify: (choice=Chronic- Hepatitis C)'1                      | 0.0111    |
| ##                                                                       | eQQ Med   |
| ## distance                                                              | 0.2757    |
| ## 'Insurance Class'COMM                                                 | 0.0000    |
| ## 'Insurance Class'MEDICAID                                             | 0.0000    |
| ## 'Insurance Class'MEDICARE                                             | 0.0000    |
| ## 'Insurance Class'OTHER                                                | 0.0000    |
| ## 'Insurance Class'SP                                                   | 0.0000    |
| ## 'Race:'American Indian/Alaskan Native                                 | 0.0000    |
| ## 'Race:'Asian                                                          | 0.0000    |
| ## 'Race:'Black                                                          | 0.0000    |
| ## 'Race:'Native Hawaiian/Pacific Isle                                   | 0.0000    |
| ## 'Race:'Other                                                          | 0.0000    |
| ## 'Race:'Unknown                                                        | 0.0000    |
| ## 'Does the patient have a history of cancer?'1                         | 0.0000    |
| ## 'Please specify: (choice=Hypertension)'1                              | 0.0000    |
| ## 'Please specify: (choice=Coronary Artery Disease)'1                   | 0.0000    |
| ## 'Please specify: (choice=Congestive Heart Failure)'1                  | 0.0000    |
| ## 'Please specify: (choice=Asthma)'1                                    | 0.0000    |
| ## 'Please specify: (choice=Chronic Obstructive Pulmonary Disease)'1     | 0.0000    |
| ## 'Please specify: (choice=Chronic Renal Insufficiency)'1               | 0.0000    |
| ## 'Please specify: (choice=Cirrhosis)'1                                 | 0.0000    |
| ## 'Did the patient receive hemodialysis during this admission?'1        | 0.0000    |
| ## 'Was plasma given to the patient during this admission?'1             | 0.0000    |
| ## 'Was the patient placed in a prone position during their admission?'1 | 0.0000    |
| ## 'Age at Admission'                                                    | 3.0000    |
| ## Per_Capita                                                            | 1945.0000 |
| ## 'SIRS RR'                                                             | 0.0000    |
| ## SIRS_WBC                                                              | 0.0000    |
| ## SIRS...110                                                            | 0.0000    |
| ## 'Creatinine (if 0 = N/A)'                                             | 0.1000    |
| ## Ferritin                                                              | 104.5000  |
| ## CRP                                                                   | 27.5000   |
| ## 'D-Dimer'                                                             | 223.5000  |
| ## 'Admission Date:'                                                     | 7.0000    |
| ## 'Please specify: (choice=Diabetes)'1                                  | 0.0000    |
| ## 'SIRS TEMP'                                                           | 0.0000    |
| ## 'Please specify: (choice=Chronic- Hepatitis C)'1                      | 0.0000    |
| ##                                                                       | eQQ Mean  |
| ## distance                                                              | 0.2517    |
| ## 'Insurance Class'COMM                                                 | 0.0111    |
| ## 'Insurance Class'MEDICAID                                             | 0.0667    |
| ## 'Insurance Class'MEDICARE                                             | 0.0556    |
| ## 'Insurance Class'OTHER                                                | 0.0000    |
| ## 'Insurance Class'SP                                                   | 0.0000    |
| ## 'Race:'American Indian/Alaskan Native                                 | 0.0000    |
| ## 'Race:'Asian                                                          | 0.0222    |
| ## 'Race:'Black                                                          | 0.0000    |

|                                                                          |            |
|--------------------------------------------------------------------------|------------|
| ## 'Race:'Native Hawaiian/Pacific Isle                                   | 0.0000     |
| ## 'Race:'Other                                                          | 0.0111     |
| ## 'Race:'Unknown                                                        | 0.0333     |
| ## 'Does the patient have a history of cancer?'1                         | 0.0111     |
| ## 'Please specify: (choice=Hypertension)'1                              | 0.1000     |
| ## 'Please specify: (choice=Coronary Artery Disease)'1                   | 0.0111     |
| ## 'Please specify: (choice=Congestive Heart Failure)'1                  | 0.0000     |
| ## 'Please specify: (choice=Asthma)'1                                    | 0.0444     |
| ## 'Please specify: (choice=Chronic Obstructive Pulmonary Disease)'1     | 0.0222     |
| ## 'Please specify: (choice=Chronic Renal Insufficiency)'1               | 0.0444     |
| ## 'Please specify: (choice=Cirrhosis)'1                                 | 0.0000     |
| ## 'Did the patient receive hemodialysis during this admission?'1        | 0.0667     |
| ## 'Was plasma given to the patient during this admission?'1             | 0.0556     |
| ## 'Was the patient placed in a prone position during their admission?'1 | 0.1556     |
| ## 'Age at Admission'                                                    | 3.4778     |
| ## Per_Capita                                                            | 2849.9667  |
| ## 'SIRS RR'                                                             | 0.0111     |
| ## SIRS_WBC                                                              | 0.0222     |
| ## SIRS...110                                                            | 0.0222     |
| ## 'Creatinine (if 0 = N/A)'                                             | 0.3256     |
| ## Ferritin                                                              | 115.5222   |
| ## CRP                                                                   | 27.2367    |
| ## 'D-Domer'                                                             | 2990.0444  |
| ## 'Admission Date:'                                                     | 7.3778     |
| ## 'Please specify: (choice=Diabetes)'1                                  | 0.0778     |
| ## 'SIRS TEMP'                                                           | 0.0556     |
| ## 'Please specify: (choice=Chronic- Hepatitis C)'1                      | 0.0111     |
| ##                                                                       | eQQ Max    |
| ## distance                                                              | 0.3326     |
| ## 'Insurance Class'COMM                                                 | 1.0000     |
| ## 'Insurance Class'MEDICAID                                             | 1.0000     |
| ## 'Insurance Class'MEDICARE                                             | 1.0000     |
| ## 'Insurance Class'OTHER                                                | 0.0000     |
| ## 'Insurance Class'SP                                                   | 0.0000     |
| ## 'Race:'American Indian/Alaskan Native                                 | 0.0000     |
| ## 'Race:'Asian                                                          | 1.0000     |
| ## 'Race:'Black                                                          | 0.0000     |
| ## 'Race:'Native Hawaiian/Pacific Isle                                   | 0.0000     |
| ## 'Race:'Other                                                          | 1.0000     |
| ## 'Race:'Unknown                                                        | 1.0000     |
| ## 'Does the patient have a history of cancer?'1                         | 1.0000     |
| ## 'Please specify: (choice=Hypertension)'1                              | 1.0000     |
| ## 'Please specify: (choice=Coronary Artery Disease)'1                   | 1.0000     |
| ## 'Please specify: (choice=Congestive Heart Failure)'1                  | 0.0000     |
| ## 'Please specify: (choice=Asthma)'1                                    | 1.0000     |
| ## 'Please specify: (choice=Chronic Obstructive Pulmonary Disease)'1     | 1.0000     |
| ## 'Please specify: (choice=Chronic Renal Insufficiency)'1               | 1.0000     |
| ## 'Please specify: (choice=Cirrhosis)'1                                 | 0.0000     |
| ## 'Did the patient receive hemodialysis during this admission?'1        | 1.0000     |
| ## 'Was plasma given to the patient during this admission?'1             | 1.0000     |
| ## 'Was the patient placed in a prone position during their admission?'1 | 1.0000     |
| ## 'Age at Admission'                                                    | 11.0000    |
| ## Per_Capita                                                            | 17454.0000 |
| ## 'SIRS RR'                                                             | 1.0000     |

|                                                                         |             |
|-------------------------------------------------------------------------|-------------|
| ## SIRS_WBC                                                             | 1.0000      |
| ## SIRS...110                                                           | 1.0000      |
| ## 'Creatinine (if 0 = N/A)'                                            | 5.6000      |
| ## Ferritin                                                             | 1138.0000   |
| ## CRP                                                                  | 91.2000     |
| ## 'D-Domer'                                                            | 56392.0000  |
| ## 'Admission Date:'                                                    | 18.0000     |
| ## 'Please specify: (choice=Diabetes)'                                  | 1.0000      |
| ## 'SIRS TEMP'                                                          | 1.0000      |
| ## 'Please specify: (choice=Chronic- Hepatitis C)'                      | 1.0000      |
| ##                                                                      |             |
| ## Percent Balance Improvement:                                         |             |
| ##                                                                      | Mean Diff.  |
| ## distance                                                             | 26.2203     |
| ## 'Insurance Class'COMM                                                | 40.9524     |
| ## 'Insurance Class'MEDICAID                                            | -12300.0000 |
| ## 'Insurance Class'MEDICARE                                            | -118.3099   |
| ## 'Insurance Class'OTHER                                               | 0.0000      |
| ## 'Insurance Class'SP                                                  | 100.0000    |
| ## 'Race:'American Indian/Alaskan Native                                | 100.0000    |
| ## 'Race:'Asian                                                         | -29.1667    |
| ## 'Race:'Black                                                         | 100.0000    |
| ## 'Race:'Native Hawaiian/Pacific Isle                                  | 0.0000      |
| ## 'Race:'Other                                                         | 57.8231     |
| ## 'Race:'Unknown                                                       | -161.9718   |
| ## 'Does the patient have a history of cancer?'                         | 77.8571     |
| ## 'Please specify: (choice=Hypertension)'                              | 15.3263     |
| ## 'Please specify: (choice=Coronary Artery Disease)'                   | 42.5926     |
| ## 'Please specify: (choice=Congestive Heart Failure)'                  | 100.0000    |
| ## 'Please specify: (choice=Asthma)'                                    | -85.0746    |
| ## 'Please specify: (choice=Chronic Obstructive Pulmonary Disease)'     | 15.6463     |
| ## 'Please specify: (choice=Chronic Renal Insufficiency)'               | -4.6414     |
| ## 'Please specify: (choice=Cirrhosis)'                                 | 100.0000    |
| ## 'Did the patient receive hemodialysis during this admission?'        | 18.5996     |
| ## 'Was plasma given to the patient during this admission?'             | -16.1049    |
| ## 'Was the patient placed in a prone position during their admission?' | 13.2000     |
| ## 'Age at Admission'                                                   | -74.6926    |
| ## Per_Capita                                                           | -131.6639   |
| ## 'SIRS RR'                                                            | 68.3673     |
| ## SIRS_WBC                                                             | 75.3968     |
| ## SIRS...110                                                           | 100.0000    |
| ## 'Creatinine (if 0 = N/A)'                                            | -9.3810     |
| ## Ferritin                                                             | 18.6433     |
| ## CRP                                                                  | 46.9539     |
| ## 'D-Domer'                                                            | -0.6405     |
| ## 'Admission Date:'                                                    | 41.9665     |
| ## 'Please specify: (choice=Diabetes)'                                  | 2.0316      |
| ## 'SIRS TEMP'                                                          | 53.2428     |
| ## 'Please specify: (choice=Chronic- Hepatitis C)'                      | 0.0000      |
| ##                                                                      | eQQ Med     |
| ## distance                                                             | 26.5631     |
| ## 'Insurance Class'COMM                                                | 0.0000      |
| ## 'Insurance Class'MEDICAID                                            | 0.0000      |
| ## 'Insurance Class'MEDICARE                                            | 0.0000      |



|                                                                          |           |
|--------------------------------------------------------------------------|-----------|
| ## 'Insurance Class'OTHER                                                | 0.0000    |
| ## 'Insurance Class'SP                                                   | 0.0000    |
| ## 'Race:'American Indian/Alaskan Native                                 | 0.0000    |
| ## 'Race:'Asian                                                          | 0.0000    |
| ## 'Race:'Black                                                          | 0.0000    |
| ## 'Race:'Native Hawaiian/Pacific Isle                                   | 0.0000    |
| ## 'Race:'Other                                                          | 0.0000    |
| ## 'Race:'Unknown                                                        | 0.0000    |
| ## 'Does the patient have a history of cancer?'1                         | 0.0000    |
| ## 'Please specify: (choice=Hypertension)'1                              | 0.0000    |
| ## 'Please specify: (choice=Coronary Artery Disease)'1                   | 0.0000    |
| ## 'Please specify: (choice=Congestive Heart Failure)'1                  | 0.0000    |
| ## 'Please specify: (choice=Asthma)'1                                    | 0.0000    |
| ## 'Please specify: (choice=Chronic Obstructive Pulmonary Disease)'1     | 0.0000    |
| ## 'Please specify: (choice=Chronic Renal Insufficiency)'1               | 0.0000    |
| ## 'Please specify: (choice=Cirrhosis)'1                                 | 0.0000    |
| ## 'Did the patient receive hemodialysis during this admission?'1        | 0.0000    |
| ## 'Was plasma given to the patient during this admission?'1             | 0.0000    |
| ## 'Was the patient placed in a prone position during their admission?'1 | 0.0000    |
| ## 'Age at Admission'                                                    | -50.0000  |
| ## Per_Capita                                                            | 30.8321   |
| ## 'SIRS RR'                                                             | 0.0000    |
| ## SIRS_WBC                                                              | 0.0000    |
| ## SIRS...110                                                            | 0.0000    |
| ## 'Creatinine (if 0 = N/A)'                                             | 0.0000    |
| ## Ferritin                                                              | 24.8201   |
| ## CRP                                                                   | 31.1640   |
| ## 'D-Domer'                                                             | -91.0256  |
| ## 'Admission Date:'                                                     | 50.0000   |
| ## 'Please specify: (choice=Diabetes)'1                                  | 0.0000    |
| ## 'SIRS TEMP'                                                           | 0.0000    |
| ## 'Please specify: (choice=Chronic- Hepatitis C)'1                      | 0.0000    |
| ##                                                                       | eQQ Mean  |
| ## distance                                                              | 26.7916   |
| ## 'Insurance Class'COMM                                                 | 50.0000   |
| ## 'Insurance Class'MEDICAID                                             | -Inf      |
| ## 'Insurance Class'MEDICARE                                             | -150.0000 |
| ## 'Insurance Class'OTHER                                                | 0.0000    |
| ## 'Insurance Class'SP                                                   | 100.0000  |
| ## 'Race:'American Indian/Alaskan Native                                 | 100.0000  |
| ## 'Race:'Asian                                                          | 0.0000    |
| ## 'Race:'Black                                                          | 100.0000  |
| ## 'Race:'Native Hawaiian/Pacific Isle                                   | 0.0000    |
| ## 'Race:'Other                                                          | 66.6667   |
| ## 'Race:'Unknown                                                        | -200.0000 |
| ## 'Does the patient have a history of cancer?'1                         | 75.0000   |
| ## 'Please specify: (choice=Hypertension)'1                              | 18.1818   |
| ## 'Please specify: (choice=Coronary Artery Disease)'1                   | 50.0000   |
| ## 'Please specify: (choice=Congestive Heart Failure)'1                  | 100.0000  |
| ## 'Please specify: (choice=Asthma)'1                                    | -100.0000 |
| ## 'Please specify: (choice=Chronic Obstructive Pulmonary Disease)'1     | 33.3333   |
| ## 'Please specify: (choice=Chronic Renal Insufficiency)'1               | 0.0000    |
| ## 'Please specify: (choice=Cirrhosis)'1                                 | 100.0000  |
| ## 'Did the patient receive hemodialysis during this admission?'1        | 25.0000   |

```

## 'Was plasma given to the patient during this admission?'1      0.0000
## 'Was the patient placed in a prone position during their admission?'1 12.5000
## 'Age at Admission'                                           -5.7432
## Per_Capita                                                    20.4828
## 'SIRS RR'                                                     75.0000
## SIRS_WBC                                                       75.0000
## SIRS...110                                                    80.0000
## 'Creatinine (if 0 = N/A)'<                                     -10.9848
## Ferritin                                                       15.7182
## CRP                                                            29.6190
## 'D-Domer'                                                     1.5036
## 'Admission Date:'                                             40.6082
## 'Please specify: (choice=Diabetes)'1                          0.0000
## 'SIRS TEMP'                                                  54.5455
## 'Please specify: (choice=Chronic- Hepatitis C)'1             0.0000
##                                                                eQQ Max
## distance                                                       28.5423
## 'Insurance Class'COMM                                         0.0000
## 'Insurance Class'MEDICAID                                     -Inf
## 'Insurance Class'MEDICARE                                    0.0000
## 'Insurance Class'OTHER                                       0.0000
## 'Insurance Class'SP                                           100.0000
## 'Race:'American Indian/Alaskan Native                       100.0000
## 'Race:'Asian                                                  0.0000
## 'Race:'Black                                                  100.0000
## 'Race:'Native Hawaiian/Pacific Isle                          0.0000
## 'Race:'Other                                                  0.0000
## 'Race:'Unknown                                               0.0000
## 'Does the patient have a history of cancer?'1                0.0000
## 'Please specify: (choice=Hypertension)'1                      0.0000
## 'Please specify: (choice=Coronary Artery Disease)'1          0.0000
## 'Please specify: (choice=Congestive Heart Failure)'1         100.0000
## 'Please specify: (choice=Asthma)'1                            0.0000
## 'Please specify: (choice=Chronic Obstructive Pulmonary Disease)'1 0.0000
## 'Please specify: (choice=Chronic Renal Insufficiency)'1      0.0000
## 'Please specify: (choice=Cirrhosis)'1                        100.0000
## 'Did the patient receive hemodialysis during this admission?'1 0.0000
## 'Was plasma given to the patient during this admission?'1   0.0000
## 'Was the patient placed in a prone position during their admission?'1 0.0000
## 'Age at Admission'                                           -10.0000
## Per_Capita                                                    10.5886
## 'SIRS RR'                                                     0.0000
## SIRS_WBC                                                       0.0000
## SIRS...110                                                    0.0000
## 'Creatinine (if 0 = N/A)'<                                     0.0000
## Ferritin                                                       0.0000
## CRP                                                            -0.7735
## 'D-Domer'                                                     19.8134
## 'Admission Date:'                                             50.0000
## 'Please specify: (choice=Diabetes)'1                          0.0000
## 'SIRS TEMP'                                                  0.0000
## 'Please specify: (choice=Chronic- Hepatitis C)'1             0.0000
##
## Sample sizes:

```

```
##           Control Treated
## All           124      90
## Matched       90      90
## Unmatched     34       0
## Discarded      0       0
```

```
matched.cohort.hcq.sirs.2 = get_matches(my.hcq.match.sirs.2, hcq.select.na.sirs.2.na, id_cols = NULL, n
# is there any differene between the groups
binary.variables.hcq.sirs.2 = matched.cohort.hcq.sirs.2 %>%
  dplyr::select(Was.plasma.given.to.the.patient.during.this.admission., Does.the.patient.have.a.history
chi.p.exit.hcq.sirs.2 = vector()
chi.variable.name.hcq.sirs.2 = vector()

for ( i in c(1:8, 10:11, 13,14,15)) { # cirrhosis hep c
  variable.1 = binary.variables.hcq.sirs.2[[i]][binary.variables.hcq.sirs.2$COVID..Was.hydroxychloroqui
  variable.0 = binary.variables.hcq.sirs.2[[i]][binary.variables.hcq.sirs.2$COVID..Was.hydroxychloroqui
  chisquare.test = chisq.test(variable.1, variable.0)
  chisquare.test.p.value = chisquare.test$p.value
  chi.p.exit.hcq.sirs.2[i] = chisquare.test.p.value
  chi.variable.name.hcq.sirs.2[i] = colnames(binary.variables.hcq.sirs.2)[i]
}
```

```
## Warning in chisq.test(variable.1, variable.0): Chi-squared approximation may be
## incorrect
```

```
## Warning in chisq.test(variable.1, variable.0): Chi-squared approximation may be
## incorrect
```

```
## Warning in chisq.test(variable.1, variable.0): Chi-squared approximation may be
## incorrect
```

```
## Warning in chisq.test(variable.1, variable.0): Chi-squared approximation may be
## incorrect
```

```
## Warning in chisq.test(variable.1, variable.0): Chi-squared approximation may be
## incorrect
```

```
## Warning in chisq.test(variable.1, variable.0): Chi-squared approximation may be
## incorrect
```

```
## Warning in chisq.test(variable.1, variable.0): Chi-squared approximation may be
## incorrect
```

```
## Warning in chisq.test(variable.1, variable.0): Chi-squared approximation may be
## incorrect
```

```
## Warning in chisq.test(variable.1, variable.0): Chi-squared approximation may be
## incorrect
```

```
## Warning in chisq.test(variable.1, variable.0): Chi-squared approximation may be
## incorrect
```

```

chi.df.hcq.sirs.2 = data.frame(chi.variable.name.hcq.sirs.2, chi.p.exit.hcq.sirs.2) # no diff

numerical.variables.hcq.sirs.2 = matched.cohort.hcq.sirs.2 %>%
  dplyr::select(COVID..Was.hydroxychloroquine..Plaquenil..given.during.the.patient.s.admission., Age.at

p.value.exit.hcq.sirs.2 = vector()
variable.name.exit.hcq.sirs.2 = vector()

for ( i in c(2:10, 12)) { # hcq 1 # skip date
  variable.1 = numerical.variables.hcq.sirs.2[[i]][numerical.variables.hcq.sirs.2$COVID..Was.hydroxychl
  variable.0 = numerical.variables.hcq.sirs.2[[i]][numerical.variables.hcq.sirs.2$COVID..Was.hydroxychl
  middle.t.test = t.test(variable.1, variable.0)
  t.test.p.value = middle.t.test$p.value
  p.value.exit.hcq.sirs.2[i] = t.test.p.value
  variable.name.exit.hcq.sirs.2[i] = colnames(numerical.variables.hcq)[i]
}

t.test.df.hcq = data.frame(variable.name.exit.hcq.sirs.2, p.value.exit.hcq.sirs.2) # no diff

match.hcq.glm.sirs.2 = glm(death ~ COVID..Was.hydroxychloroquine..Plaquenil..given.during.the.patient.s
match.hcq.summary.sirs.2 = summary(match.hcq.glm.sirs.2) #p 0.0167 ss= 180
match.hcq.conf.intervals.sirs.2 = exp(cbind(coef(match.hcq.glm.sirs.2), confint(match.hcq.glm.sirs.2)))

## Waiting for profiling to be done...

## sirs 2 with larger sample size and no labs
row.names(hcq.select.no.labs.na.sirs.2) <- 1:nrow(hcq.select.no.labs.na.sirs.2)

my.full.match.hcq.sirs.2.no.labs = matchit('COVID- Was hydroxychloroquine (Plaquenil) given during the p
summary(my.full.match.hcq.sirs.2.no.labs)

##
## Call:
## matchit(formula = 'COVID- Was hydroxychloroquine (Plaquenil) given during the patient's admission?' +
##   'Insurance Class' + 'Race:' + 'Does the patient have a history of cancer?' +
##   'Please specify: (choice=Hypertension)' + 'Please specify: (choice=Coronary Artery Disease)' +
##   'Please specify: (choice=Congestive Heart Failure)' +
##   'Please specify: (choice=Asthma)' + 'Please specify: (choice=Chronic Obstructive Pulmonary D
##   'Please specify: (choice=Chronic Renal Insufficiency)' +
##   'Please specify: (choice=Cirrhosis)' + 'Did the patient receive hemodialysis during this adm
##   'Was plasma given to the patient during this admission?' +
##   'Was the patient placed in a prone position during their admission?' +
##   'Was plasma given to the patient during this admission?' +
##   'Age at Admission' + Per_Capita + 'SIRS RR' + SIRS_WBC +
##   SIRS...110 + 'Creatinine (if 0 = N/A)' + 'Admission Date:' +
##   'Please specify: (choice=Diabetes)' + 'SIRS TEMP' + 'Please specify: (choice=Chronic- Hepati
##   data = hcq.select.no.labs.na.sirs.2, method = "nearest")
##
## Summary of balance for all data:
##
## distance
##
## Means Treated
## 0.5378

```

|                                                                          |               |
|--------------------------------------------------------------------------|---------------|
| ## 'Insurance Class'COMM                                                 | 0.3793        |
| ## 'Insurance Class'MEDICAID                                             | 0.2414        |
| ## 'Insurance Class'MEDICARE                                             | 0.3621        |
| ## 'Insurance Class'OTHER                                                | 0.0000        |
| ## 'Insurance Class'SP                                                   | 0.0172        |
| ## 'Race:'American Indian/Alaskan Native                                 | 0.0043        |
| ## 'Race:'Asian                                                          | 0.0216        |
| ## 'Race:'Black                                                          | 0.2155        |
| ## 'Race:'Native Hawaiian/Pacific Isle                                   | 0.0000        |
| ## 'Race:'Other                                                          | 0.0517        |
| ## 'Race:'Unknown                                                        | 0.1853        |
| ## 'Does the patient have a history of cancer?'1                         | 0.1250        |
| ## 'Please specify: (choice=Hypertension)'1                              | 0.5043        |
| ## 'Please specify: (choice=Coronary Artery Disease)'1                   | 0.1034        |
| ## 'Please specify: (choice=Congestive Heart Failure)'1                  | 0.0302        |
| ## 'Please specify: (choice=Asthma)'1                                    | 0.0733        |
| ## 'Please specify: (choice=Chronic Obstructive Pulmonary Disease)'1     | 0.0603        |
| ## 'Please specify: (choice=Chronic Renal Insufficiency)'1               | 0.0647        |
| ## 'Please specify: (choice=Cirrhosis)'1                                 | 0.0000        |
| ## 'Did the patient receive hemodialysis during this admission?'1        | 0.1121        |
| ## 'Was plasma given to the patient during this admission?'1             | 0.1767        |
| ## 'Was the patient placed in a prone position during their admission?'1 | 0.3276        |
| ## 'Age at Admission'                                                    | 61.5862       |
| ## Per_Capita                                                            | 49159.8491    |
| ## 'SIRS RR'                                                             | 0.8793        |
| ## SIRS_WBC                                                              | 0.2672        |
| ## SIRS...110                                                            | 2.5000        |
| ## 'Creatinine (if 0 = N/A)'                                             | 1.3022        |
| ## 'Admission Date:'                                                     | 18355.4741    |
| ## 'Please specify: (choice=Diabetes)'1                                  | 0.3578        |
| ## 'SIRS TEMP'                                                           | 0.4483        |
| ## 'Please specify: (choice=Chronic- Hepatitis C)'1                      | 0.0129        |
| ##                                                                       | Means Control |
| ## distance                                                              | 0.2938        |
| ## 'Insurance Class'COMM                                                 | 0.2822        |
| ## 'Insurance Class'MEDICAID                                             | 0.1945        |
| ## 'Insurance Class'MEDICARE                                             | 0.5096        |
| ## 'Insurance Class'OTHER                                                | 0.0027        |
| ## 'Insurance Class'SP                                                   | 0.0110        |
| ## 'Race:'American Indian/Alaskan Native                                 | 0.0055        |
| ## 'Race:'Asian                                                          | 0.0274        |
| ## 'Race:'Black                                                          | 0.1945        |
| ## 'Race:'Native Hawaiian/Pacific Isle                                   | 0.0027        |
| ## 'Race:'Other                                                          | 0.0411        |
| ## 'Race:'Unknown                                                        | 0.1534        |
| ## 'Does the patient have a history of cancer?'1                         | 0.1753        |
| ## 'Please specify: (choice=Hypertension)'1                              | 0.4822        |
| ## 'Please specify: (choice=Coronary Artery Disease)'1                   | 0.1205        |
| ## 'Please specify: (choice=Congestive Heart Failure)'1                  | 0.0603        |
| ## 'Please specify: (choice=Asthma)'1                                    | 0.0822        |
| ## 'Please specify: (choice=Chronic Obstructive Pulmonary Disease)'1     | 0.0822        |
| ## 'Please specify: (choice=Chronic Renal Insufficiency)'1               | 0.0438        |
| ## 'Please specify: (choice=Cirrhosis)'1                                 | 0.0110        |
| ## 'Did the patient receive hemodialysis during this admission?'1        | 0.0438        |

|                                                                          |            |
|--------------------------------------------------------------------------|------------|
| ## 'Was plasma given to the patient during this admission?'1             | 0.1014     |
| ## 'Was the patient placed in a prone position during their admission?'1 | 0.1699     |
| ## 'Age at Admission'                                                    | 65.4082    |
| ## Per_Capita                                                            | 51657.1507 |
| ## 'SIRS RR'                                                             | 0.8603     |
| ## SIRS_WBC                                                              | 0.2877     |
| ## SIRS...110                                                            | 2.4164     |
| ## 'Creatinine (if 0 = N/A)'                                             | 1.2238     |
| ## 'Admission Date:'                                                     | 18367.2986 |
| ## 'Please specify: (choice=Diabetes)'1                                  | 0.3205     |
| ## 'SIRS TEMP'                                                           | 0.3425     |
| ## 'Please specify: (choice=Chronic- Hepatitis C)'1                      | 0.0000     |
| ##                                                                       | SD Control |
| ## distance                                                              | 0.2171     |
| ## 'Insurance Class'COMM                                                 | 0.4507     |
| ## 'Insurance Class'MEDICAID                                             | 0.3964     |
| ## 'Insurance Class'MEDICARE                                             | 0.5006     |
| ## 'Insurance Class'OTHER                                                | 0.0523     |
| ## 'Insurance Class'SP                                                   | 0.1043     |
| ## 'Race:'American Indian/Alaskan Native                                 | 0.0739     |
| ## 'Race:'Asian                                                          | 0.1635     |
| ## 'Race:'Black                                                          | 0.3964     |
| ## 'Race:'Native Hawaiian/Pacific Isle                                   | 0.0523     |
| ## 'Race:'Other                                                          | 0.1988     |
| ## 'Race:'Unknown                                                        | 0.3609     |
| ## 'Does the patient have a history of cancer?'1                         | 0.3808     |
| ## 'Please specify: (choice=Hypertension)'1                              | 0.5004     |
| ## 'Please specify: (choice=Coronary Artery Disease)'1                   | 0.3260     |
| ## 'Please specify: (choice=Congestive Heart Failure)'1                  | 0.2383     |
| ## 'Please specify: (choice=Asthma)'1                                    | 0.2750     |
| ## 'Please specify: (choice=Chronic Obstructive Pulmonary Disease)'1     | 0.2750     |
| ## 'Please specify: (choice=Chronic Renal Insufficiency)'1               | 0.2050     |
| ## 'Please specify: (choice=Cirrhosis)'1                                 | 0.1043     |
| ## 'Did the patient receive hemodialysis during this admission?'1        | 0.2050     |
| ## 'Was plasma given to the patient during this admission?'1             | 0.3022     |
| ## 'Was the patient placed in a prone position during their admission?'1 | 0.3760     |
| ## 'Age at Admission'                                                    | 18.2305    |
| ## Per_Capita                                                            | 22169.4493 |
| ## 'SIRS RR'                                                             | 0.3472     |
| ## SIRS_WBC                                                              | 0.4533     |
| ## SIRS...110                                                            | 0.5946     |
| ## 'Creatinine (if 0 = N/A)'                                             | 1.3991     |
| ## 'Admission Date:'                                                     | 16.3982    |
| ## 'Please specify: (choice=Diabetes)'1                                  | 0.4673     |
| ## 'SIRS TEMP'                                                           | 0.4752     |
| ## 'Please specify: (choice=Chronic- Hepatitis C)'1                      | 0.0000     |
| ##                                                                       | Mean Diff  |
| ## distance                                                              | 0.2439     |
| ## 'Insurance Class'COMM                                                 | 0.0971     |
| ## 'Insurance Class'MEDICAID                                             | 0.0469     |
| ## 'Insurance Class'MEDICARE                                             | -0.1475    |
| ## 'Insurance Class'OTHER                                                | -0.0027    |
| ## 'Insurance Class'SP                                                   | 0.0063     |
| ## 'Race:'American Indian/Alaskan Native                                 | -0.0012    |

|                                                                          |            |
|--------------------------------------------------------------------------|------------|
| ## 'Race:'Asian                                                          | -0.0058    |
| ## 'Race:'Black                                                          | 0.0210     |
| ## 'Race:'Native Hawaiian/Pacific Isle                                   | -0.0027    |
| ## 'Race:'Other                                                          | 0.0106     |
| ## 'Race:'Unknown                                                        | 0.0319     |
| ## 'Does the patient have a history of cancer?'1                         | -0.0503    |
| ## 'Please specify: (choice=Hypertension)'1                              | 0.0221     |
| ## 'Please specify: (choice=Coronary Artery Disease)'1                   | -0.0171    |
| ## 'Please specify: (choice=Congestive Heart Failure)'1                  | -0.0301    |
| ## 'Please specify: (choice=Asthma)'1                                    | -0.0089    |
| ## 'Please specify: (choice=Chronic Obstructive Pulmonary Disease)'1     | -0.0218    |
| ## 'Please specify: (choice=Chronic Renal Insufficiency)'1               | 0.0208     |
| ## 'Please specify: (choice=Cirrhosis)'1                                 | -0.0110    |
| ## 'Did the patient receive hemodialysis during this admission?'1        | 0.0682     |
| ## 'Was plasma given to the patient during this admission?'1             | 0.0754     |
| ## 'Was the patient placed in a prone position during their admission?'1 | 0.1577     |
| ## 'Age at Admission'                                                    | -3.8220    |
| ## Per_Capita                                                            | -2497.3015 |
| ## 'SIRS RR'                                                             | 0.0190     |
| ## SIRS_WBC                                                              | -0.0204    |
| ## SIRS...110                                                            | 0.0836     |
| ## 'Creatinine (if 0 = N/A)'                                             | 0.0783     |
| ## 'Admission Date:'                                                     | -11.8245   |
| ## 'Please specify: (choice=Diabetes)'1                                  | 0.0372     |
| ## 'SIRS TEMP'                                                           | 0.1058     |
| ## 'Please specify: (choice=Chronic- Hepatitis C)'1                      | 0.0129     |
| ##                                                                       | eQQ Med    |
| ## distance                                                              | 0.2616     |
| ## 'Insurance Class'COMM                                                 | 0.0000     |
| ## 'Insurance Class'MEDICAID                                             | 0.0000     |
| ## 'Insurance Class'MEDICARE                                             | 0.0000     |
| ## 'Insurance Class'OTHER                                                | 0.0000     |
| ## 'Insurance Class'SP                                                   | 0.0000     |
| ## 'Race:'American Indian/Alaskan Native                                 | 0.0000     |
| ## 'Race:'Asian                                                          | 0.0000     |
| ## 'Race:'Black                                                          | 0.0000     |
| ## 'Race:'Native Hawaiian/Pacific Isle                                   | 0.0000     |
| ## 'Race:'Other                                                          | 0.0000     |
| ## 'Race:'Unknown                                                        | 0.0000     |
| ## 'Does the patient have a history of cancer?'1                         | 0.0000     |
| ## 'Please specify: (choice=Hypertension)'1                              | 0.0000     |
| ## 'Please specify: (choice=Coronary Artery Disease)'1                   | 0.0000     |
| ## 'Please specify: (choice=Congestive Heart Failure)'1                  | 0.0000     |
| ## 'Please specify: (choice=Asthma)'1                                    | 0.0000     |
| ## 'Please specify: (choice=Chronic Obstructive Pulmonary Disease)'1     | 0.0000     |
| ## 'Please specify: (choice=Chronic Renal Insufficiency)'1               | 0.0000     |
| ## 'Please specify: (choice=Cirrhosis)'1                                 | 0.0000     |
| ## 'Did the patient receive hemodialysis during this admission?'1        | 0.0000     |
| ## 'Was plasma given to the patient during this admission?'1             | 0.0000     |
| ## 'Was the patient placed in a prone position during their admission?'1 | 0.0000     |
| ## 'Age at Admission'                                                    | 4.0000     |
| ## Per_Capita                                                            | 1879.0000  |
| ## 'SIRS RR'                                                             | 0.0000     |
| ## SIRS_WBC                                                              | 0.0000     |

|                                                                          |           |
|--------------------------------------------------------------------------|-----------|
| ## SIRS...110                                                            | 0.0000    |
| ## 'Creatinine (if 0 = N/A)'                                             | 0.1000    |
| ## 'Admission Date:'                                                     | 11.0000   |
| ## 'Please specify: (choice=Diabetes)'1                                  | 0.0000    |
| ## 'SIRS TEMP'                                                           | 0.0000    |
| ## 'Please specify: (choice=Chronic- Hepatitis C)'1                      | 0.0000    |
| ##                                                                       | eQQ Mean  |
| ## distance                                                              | 0.2448    |
| ## 'Insurance Class'COMM                                                 | 0.0991    |
| ## 'Insurance Class'MEDICAID                                             | 0.0474    |
| ## 'Insurance Class'MEDICARE                                             | 0.1466    |
| ## 'Insurance Class'OTHER                                                | 0.0043    |
| ## 'Insurance Class'SP                                                   | 0.0086    |
| ## 'Race:'American Indian/Alaskan Native                                 | 0.0000    |
| ## 'Race:'Asian                                                          | 0.0043    |
| ## 'Race:'Black                                                          | 0.0216    |
| ## 'Race:'Native Hawaiian/Pacific Isle                                   | 0.0043    |
| ## 'Race:'Other                                                          | 0.0129    |
| ## 'Race:'Unknown                                                        | 0.0345    |
| ## 'Does the patient have a history of cancer?'1                         | 0.0474    |
| ## 'Please specify: (choice=Hypertension)'1                              | 0.0216    |
| ## 'Please specify: (choice=Coronary Artery Disease)'1                   | 0.0172    |
| ## 'Please specify: (choice=Congestive Heart Failure)'1                  | 0.0302    |
| ## 'Please specify: (choice=Asthma)'1                                    | 0.0086    |
| ## 'Please specify: (choice=Chronic Obstructive Pulmonary Disease)'1     | 0.0216    |
| ## 'Please specify: (choice=Chronic Renal Insufficiency)'1               | 0.0216    |
| ## 'Please specify: (choice=Cirrhosis)'1                                 | 0.0086    |
| ## 'Did the patient receive hemodialysis during this admission?'1        | 0.0690    |
| ## 'Was plasma given to the patient during this admission?'1             | 0.0776    |
| ## 'Was the patient placed in a prone position during their admission?'1 | 0.1595    |
| ## 'Age at Admission'                                                    | 4.8017    |
| ## Per_Capita                                                            | 2839.3017 |
| ## 'SIRS RR'                                                             | 0.0216    |
| ## SIRS_WBC                                                              | 0.0216    |
| ## SIRS...110                                                            | 0.0819    |
| ## 'Creatinine (if 0 = N/A)'                                             | 0.1043    |
| ## 'Admission Date:'                                                     | 11.8534   |
| ## 'Please specify: (choice=Diabetes)'1                                  | 0.0388    |
| ## 'SIRS TEMP'                                                           | 0.1078    |
| ## 'Please specify: (choice=Chronic- Hepatitis C)'1                      | 0.0129    |
| ##                                                                       | eQQ Max   |
| ## distance                                                              | 0.3243    |
| ## 'Insurance Class'COMM                                                 | 1.0000    |
| ## 'Insurance Class'MEDICAID                                             | 1.0000    |
| ## 'Insurance Class'MEDICARE                                             | 1.0000    |
| ## 'Insurance Class'OTHER                                                | 1.0000    |
| ## 'Insurance Class'SP                                                   | 1.0000    |
| ## 'Race:'American Indian/Alaskan Native                                 | 0.0000    |
| ## 'Race:'Asian                                                          | 1.0000    |
| ## 'Race:'Black                                                          | 1.0000    |
| ## 'Race:'Native Hawaiian/Pacific Isle                                   | 1.0000    |
| ## 'Race:'Other                                                          | 1.0000    |
| ## 'Race:'Unknown                                                        | 1.0000    |
| ## 'Does the patient have a history of cancer?'1                         | 1.0000    |



|                                                                          |               |
|--------------------------------------------------------------------------|---------------|
| ## 'Please specify: (choice=Hypertension)'1                              | 1.0000        |
| ## 'Please specify: (choice=Coronary Artery Disease)'1                   | 1.0000        |
| ## 'Please specify: (choice=Congestive Heart Failure)'1                  | 1.0000        |
| ## 'Please specify: (choice=Asthma)'1                                    | 1.0000        |
| ## 'Please specify: (choice=Chronic Obstructive Pulmonary Disease)'1     | 1.0000        |
| ## 'Please specify: (choice=Chronic Renal Insufficiency)'1               | 1.0000        |
| ## 'Please specify: (choice=Cirrhosis)'1                                 | 1.0000        |
| ## 'Did the patient receive hemodialysis during this admission?'1        | 1.0000        |
| ## 'Was plasma given to the patient during this admission?'1             | 1.0000        |
| ## 'Was the patient placed in a prone position during their admission?'1 | 1.0000        |
| ## 'Age at Admission'                                                    | 10.0000       |
| ## Per_Capita                                                            | 20909.0000    |
| ## 'SIRS RR'                                                             | 1.0000        |
| ## SIRS_WBC                                                              | 1.0000        |
| ## SIRS...110                                                            | 1.0000        |
| ## 'Creatinine (if 0 = N/A)'                                             | 2.3000        |
| ## 'Admission Date:'                                                     | 34.0000       |
| ## 'Please specify: (choice=Diabetes)'1                                  | 1.0000        |
| ## 'SIRS TEMP'                                                           | 1.0000        |
| ## 'Please specify: (choice=Chronic- Hepatitis C)'1                      | 1.0000        |
| ##                                                                       |               |
| ##                                                                       |               |
| ## Summary of balance for matched data:                                  |               |
| ##                                                                       | Means Treated |
| ## distance                                                              | 0.5378        |
| ## 'Insurance Class'COMM                                                 | 0.3793        |
| ## 'Insurance Class'MEDICAID                                             | 0.2414        |
| ## 'Insurance Class'MEDICARE                                             | 0.3621        |
| ## 'Insurance Class'OTHER                                                | 0.0000        |
| ## 'Insurance Class'SP                                                   | 0.0172        |
| ## 'Race:'American Indian/Alaskan Native                                 | 0.0043        |
| ## 'Race:'Asian                                                          | 0.0216        |
| ## 'Race:'Black                                                          | 0.2155        |
| ## 'Race:'Native Hawaiian/Pacific Isle                                   | 0.0000        |
| ## 'Race:'Other                                                          | 0.0517        |
| ## 'Race:'Unknown                                                        | 0.1853        |
| ## 'Does the patient have a history of cancer?'1                         | 0.1250        |
| ## 'Please specify: (choice=Hypertension)'1                              | 0.5043        |
| ## 'Please specify: (choice=Coronary Artery Disease)'1                   | 0.1034        |
| ## 'Please specify: (choice=Congestive Heart Failure)'1                  | 0.0302        |
| ## 'Please specify: (choice=Asthma)'1                                    | 0.0733        |
| ## 'Please specify: (choice=Chronic Obstructive Pulmonary Disease)'1     | 0.0603        |
| ## 'Please specify: (choice=Chronic Renal Insufficiency)'1               | 0.0647        |
| ## 'Please specify: (choice=Cirrhosis)'1                                 | 0.0000        |
| ## 'Did the patient receive hemodialysis during this admission?'1        | 0.1121        |
| ## 'Was plasma given to the patient during this admission?'1             | 0.1767        |
| ## 'Was the patient placed in a prone position during their admission?'1 | 0.3276        |
| ## 'Age at Admission'                                                    | 61.5862       |
| ## Per_Capita                                                            | 49159.8491    |
| ## 'SIRS RR'                                                             | 0.8793        |
| ## SIRS_WBC                                                              | 0.2672        |
| ## SIRS...110                                                            | 2.5000        |
| ## 'Creatinine (if 0 = N/A)'                                             | 1.3022        |
| ## 'Admission Date:'                                                     | 18355.4741    |

|                                                                          |               |
|--------------------------------------------------------------------------|---------------|
| ## 'Please specify: (choice=Diabetes)'1                                  | 0.3578        |
| ## 'SIRS TEMP'                                                           | 0.4483        |
| ## 'Please specify: (choice=Chronic- Hepatitis C)'1                      | 0.0129        |
| ##                                                                       | Means Control |
| ## distance                                                              | 0.4183        |
| ## 'Insurance Class'COMM                                                 | 0.3190        |
| ## 'Insurance Class'MEDICAID                                             | 0.2457        |
| ## 'Insurance Class'MEDICARE                                             | 0.4224        |
| ## 'Insurance Class'OTHER                                                | 0.0000        |
| ## 'Insurance Class'SP                                                   | 0.0129        |
| ## 'Race:'American Indian/Alaskan Native                                 | 0.0043        |
| ## 'Race:'Asian                                                          | 0.0216        |
| ## 'Race:'Black                                                          | 0.2155        |
| ## 'Race:'Native Hawaiian/Pacific Isle                                   | 0.0000        |
| ## 'Race:'Other                                                          | 0.0431        |
| ## 'Race:'Unknown                                                        | 0.1724        |
| ## 'Does the patient have a history of cancer?'1                         | 0.1466        |
| ## 'Please specify: (choice=Hypertension)'1                              | 0.4784        |
| ## 'Please specify: (choice=Coronary Artery Disease)'1                   | 0.1078        |
| ## 'Please specify: (choice=Congestive Heart Failure)'1                  | 0.0603        |
| ## 'Please specify: (choice=Asthma)'1                                    | 0.1078        |
| ## 'Please specify: (choice=Chronic Obstructive Pulmonary Disease)'1     | 0.0690        |
| ## 'Please specify: (choice=Chronic Renal Insufficiency)'1               | 0.0647        |
| ## 'Please specify: (choice=Cirrhosis)'1                                 | 0.0000        |
| ## 'Did the patient receive hemodialysis during this admission?'1        | 0.0647        |
| ## 'Was plasma given to the patient during this admission?'1             | 0.1207        |
| ## 'Was the patient placed in a prone position during their admission?'1 | 0.2241        |
| ## 'Age at Admission'                                                    | 63.3103       |
| ## Per_Capita                                                            | 51047.0259    |
| ## 'SIRS RR'                                                             | 0.8966        |
| ## SIRS_WBC                                                              | 0.2888        |
| ## SIRS...110                                                            | 2.5086        |
| ## 'Creatinine (if 0 = N/A)'                                             | 1.2638        |
| ## 'Admission Date:'                                                     | 18358.7672    |
| ## 'Please specify: (choice=Diabetes)'1                                  | 0.3190        |
| ## 'SIRS TEMP'                                                           | 0.4181        |
| ## 'Please specify: (choice=Chronic- Hepatitis C)'1                      | 0.0000        |
| ##                                                                       | SD Control    |
| ## distance                                                              | 0.1735        |
| ## 'Insurance Class'COMM                                                 | 0.4671        |
| ## 'Insurance Class'MEDICAID                                             | 0.4314        |
| ## 'Insurance Class'MEDICARE                                             | 0.4950        |
| ## 'Insurance Class'OTHER                                                | 0.0000        |
| ## 'Insurance Class'SP                                                   | 0.1132        |
| ## 'Race:'American Indian/Alaskan Native                                 | 0.0657        |
| ## 'Race:'Asian                                                          | 0.1455        |
| ## 'Race:'Black                                                          | 0.4121        |
| ## 'Race:'Native Hawaiian/Pacific Isle                                   | 0.0000        |
| ## 'Race:'Other                                                          | 0.2035        |
| ## 'Race:'Unknown                                                        | 0.3786        |
| ## 'Does the patient have a history of cancer?'1                         | 0.3544        |
| ## 'Please specify: (choice=Hypertension)'1                              | 0.5006        |
| ## 'Please specify: (choice=Coronary Artery Disease)'1                   | 0.3107        |
| ## 'Please specify: (choice=Congestive Heart Failure)'1                  | 0.2386        |

|                                                                          |            |
|--------------------------------------------------------------------------|------------|
| ## 'Please specify: (choice=Asthma)'1                                    | 0.3107     |
| ## 'Please specify: (choice=Chronic Obstructive Pulmonary Disease)'1     | 0.2539     |
| ## 'Please specify: (choice=Chronic Renal Insufficiency)'1               | 0.2464     |
| ## 'Please specify: (choice=Cirrhosis)'1                                 | 0.0000     |
| ## 'Did the patient receive hemodialysis during this admission?'1        | 0.2464     |
| ## 'Was plasma given to the patient during this admission?'1             | 0.3265     |
| ## 'Was the patient placed in a prone position during their admission?'1 | 0.4179     |
| ## 'Age at Admission'                                                    | 18.4045    |
| ## Per_Capita                                                            | 22417.6636 |
| ## 'SIRS RR'                                                             | 0.3052     |
| ## SIRS_WBC                                                              | 0.4542     |
| ## SIRS...110                                                            | 0.6378     |
| ## 'Creatinine (if 0 = N/A)'                                             | 1.6035     |
| ## 'Admission Date:'                                                     | 11.7895    |
| ## 'Please specify: (choice=Diabetes)'1                                  | 0.4671     |
| ## 'SIRS TEMP'                                                           | 0.4943     |
| ## 'Please specify: (choice=Chronic- Hepatitis C)'1                      | 0.0000     |
| ##                                                                       | Mean Diff  |
| ## distance                                                              | 0.1195     |
| ## 'Insurance Class'COMM                                                 | 0.0603     |
| ## 'Insurance Class'MEDICAID                                             | -0.0043    |
| ## 'Insurance Class'MEDICARE                                             | -0.0603    |
| ## 'Insurance Class'OTHER                                                | 0.0000     |
| ## 'Insurance Class'SP                                                   | 0.0043     |
| ## 'Race:'American Indian/Alaskan Native                                 | 0.0000     |
| ## 'Race:'Asian                                                          | 0.0000     |
| ## 'Race:'Black                                                          | 0.0000     |
| ## 'Race:'Native Hawaiian/Pacific Isle                                   | 0.0000     |
| ## 'Race:'Other                                                          | 0.0086     |
| ## 'Race:'Unknown                                                        | 0.0129     |
| ## 'Does the patient have a history of cancer?'1                         | -0.0216    |
| ## 'Please specify: (choice=Hypertension)'1                              | 0.0259     |
| ## 'Please specify: (choice=Coronary Artery Disease)'1                   | -0.0043    |
| ## 'Please specify: (choice=Congestive Heart Failure)'1                  | -0.0302    |
| ## 'Please specify: (choice=Asthma)'1                                    | -0.0345    |
| ## 'Please specify: (choice=Chronic Obstructive Pulmonary Disease)'1     | -0.0086    |
| ## 'Please specify: (choice=Chronic Renal Insufficiency)'1               | 0.0000     |
| ## 'Please specify: (choice=Cirrhosis)'1                                 | 0.0000     |
| ## 'Did the patient receive hemodialysis during this admission?'1        | 0.0474     |
| ## 'Was plasma given to the patient during this admission?'1             | 0.0560     |
| ## 'Was the patient placed in a prone position during their admission?'1 | 0.1034     |
| ## 'Age at Admission'                                                    | -1.7241    |
| ## Per_Capita                                                            | -1887.1767 |
| ## 'SIRS RR'                                                             | -0.0172    |
| ## SIRS_WBC                                                              | -0.0216    |
| ## SIRS...110                                                            | -0.0086    |
| ## 'Creatinine (if 0 = N/A)'                                             | 0.0384     |
| ## 'Admission Date:'                                                     | -3.2931    |
| ## 'Please specify: (choice=Diabetes)'1                                  | 0.0388     |
| ## 'SIRS TEMP'                                                           | 0.0302     |
| ## 'Please specify: (choice=Chronic- Hepatitis C)'1                      | 0.0129     |
| ##                                                                       | eQQ Med    |
| ## distance                                                              | 0.1337     |
| ## 'Insurance Class'COMM                                                 | 0.0000     |

|                                                                          |           |
|--------------------------------------------------------------------------|-----------|
| ## 'Insurance Class'MEDICAID                                             | 0.0000    |
| ## 'Insurance Class'MEDICARE                                             | 0.0000    |
| ## 'Insurance Class'OTHER                                                | 0.0000    |
| ## 'Insurance Class'SP                                                   | 0.0000    |
| ## 'Race:'American Indian/Alaskan Native                                 | 0.0000    |
| ## 'Race:'Asian                                                          | 0.0000    |
| ## 'Race:'Black                                                          | 0.0000    |
| ## 'Race:'Native Hawaiian/Pacific Isle                                   | 0.0000    |
| ## 'Race:'Other                                                          | 0.0000    |
| ## 'Race:'Unknown                                                        | 0.0000    |
| ## 'Does the patient have a history of cancer?'1                         | 0.0000    |
| ## 'Please specify: (choice=Hypertension)'1                              | 0.0000    |
| ## 'Please specify: (choice=Coronary Artery Disease)'1                   | 0.0000    |
| ## 'Please specify: (choice=Congestive Heart Failure)'1                  | 0.0000    |
| ## 'Please specify: (choice=Asthma)'1                                    | 0.0000    |
| ## 'Please specify: (choice=Chronic Obstructive Pulmonary Disease)'1     | 0.0000    |
| ## 'Please specify: (choice=Chronic Renal Insufficiency)'1               | 0.0000    |
| ## 'Please specify: (choice=Cirrhosis)'1                                 | 0.0000    |
| ## 'Did the patient receive hemodialysis during this admission?'1        | 0.0000    |
| ## 'Was plasma given to the patient during this admission?'1             | 0.0000    |
| ## 'Was the patient placed in a prone position during their admission?'1 | 0.0000    |
| ## 'Age at Admission'                                                    | 3.0000    |
| ## Per_Capita                                                            | 1858.0000 |
| ## 'SIRS RR'                                                             | 0.0000    |
| ## SIRS_WBC                                                              | 0.0000    |
| ## SIRS...110                                                            | 0.0000    |
| ## 'Creatinine (if 0 = N/A)'                                             | 0.1000    |
| ## 'Admission Date:'                                                     | 3.0000    |
| ## 'Please specify: (choice=Diabetes)'1                                  | 0.0000    |
| ## 'SIRS TEMP'                                                           | 0.0000    |
| ## 'Please specify: (choice=Chronic- Hepatitis C)'1                      | 0.0000    |
| ##                                                                       | eQQ Mean  |
| ## distance                                                              | 0.1195    |
| ## 'Insurance Class'COMM                                                 | 0.0603    |
| ## 'Insurance Class'MEDICAID                                             | 0.0043    |
| ## 'Insurance Class'MEDICARE                                             | 0.0603    |
| ## 'Insurance Class'OTHER                                                | 0.0000    |
| ## 'Insurance Class'SP                                                   | 0.0043    |
| ## 'Race:'American Indian/Alaskan Native                                 | 0.0000    |
| ## 'Race:'Asian                                                          | 0.0000    |
| ## 'Race:'Black                                                          | 0.0000    |
| ## 'Race:'Native Hawaiian/Pacific Isle                                   | 0.0000    |
| ## 'Race:'Other                                                          | 0.0086    |
| ## 'Race:'Unknown                                                        | 0.0129    |
| ## 'Does the patient have a history of cancer?'1                         | 0.0216    |
| ## 'Please specify: (choice=Hypertension)'1                              | 0.0259    |
| ## 'Please specify: (choice=Coronary Artery Disease)'1                   | 0.0043    |
| ## 'Please specify: (choice=Congestive Heart Failure)'1                  | 0.0302    |
| ## 'Please specify: (choice=Asthma)'1                                    | 0.0345    |
| ## 'Please specify: (choice=Chronic Obstructive Pulmonary Disease)'1     | 0.0086    |
| ## 'Please specify: (choice=Chronic Renal Insufficiency)'1               | 0.0000    |
| ## 'Please specify: (choice=Cirrhosis)'1                                 | 0.0000    |
| ## 'Did the patient receive hemodialysis during this admission?'1        | 0.0474    |
| ## 'Was plasma given to the patient during this admission?'1             | 0.0560    |

|                                                                          |            |
|--------------------------------------------------------------------------|------------|
| ## 'Was the patient placed in a prone position during their admission?'1 | 0.1034     |
| ## 'Age at Admission'                                                    | 3.8448     |
| ## Per_Capita                                                            | 2716.4440  |
| ## 'SIRS RR'                                                             | 0.0172     |
| ## SIRS_WBC                                                              | 0.0216     |
| ## SIRS...110                                                            | 0.0172     |
| ## 'Creatinine (if 0 = N/A)'                                             | 0.1341     |
| ## 'Admission Date:'                                                     | 3.5172     |
| ## 'Please specify: (choice=Diabetes)'1                                  | 0.0388     |
| ## 'SIRS TEMP'                                                           | 0.0302     |
| ## 'Please specify: (choice=Chronic- Hepatitis C)'1                      | 0.0129     |
| ##                                                                       | eQQ Max    |
| ## distance                                                              | 0.172      |
| ## 'Insurance Class'COMM                                                 | 1.000      |
| ## 'Insurance Class'MEDICAID                                             | 1.000      |
| ## 'Insurance Class'MEDICARE                                             | 1.000      |
| ## 'Insurance Class'OTHER                                                | 0.000      |
| ## 'Insurance Class'SP                                                   | 1.000      |
| ## 'Race:'American Indian/Alaskan Native                                 | 0.000      |
| ## 'Race:'Asian                                                          | 0.000      |
| ## 'Race:'Black                                                          | 0.000      |
| ## 'Race:'Native Hawaiian/Pacific Isle                                   | 0.000      |
| ## 'Race:'Other                                                          | 1.000      |
| ## 'Race:'Unknown                                                        | 1.000      |
| ## 'Does the patient have a history of cancer?'1                         | 1.000      |
| ## 'Please specify: (choice=Hypertension)'1                              | 1.000      |
| ## 'Please specify: (choice=Coronary Artery Disease)'1                   | 1.000      |
| ## 'Please specify: (choice=Congestive Heart Failure)'1                  | 1.000      |
| ## 'Please specify: (choice=Asthma)'1                                    | 1.000      |
| ## 'Please specify: (choice=Chronic Obstructive Pulmonary Disease)'1     | 1.000      |
| ## 'Please specify: (choice=Chronic Renal Insufficiency)'1               | 0.000      |
| ## 'Please specify: (choice=Cirrhosis)'1                                 | 0.000      |
| ## 'Did the patient receive hemodialysis during this admission?'1        | 1.000      |
| ## 'Was plasma given to the patient during this admission?'1             | 1.000      |
| ## 'Was the patient placed in a prone position during their admission?'1 | 1.000      |
| ## 'Age at Admission'                                                    | 10.000     |
| ## Per_Capita                                                            | 20909.000  |
| ## 'SIRS RR'                                                             | 1.000      |
| ## SIRS_WBC                                                              | 1.000      |
| ## SIRS...110                                                            | 1.000      |
| ## 'Creatinine (if 0 = N/A)'                                             | 3.400      |
| ## 'Admission Date:'                                                     | 15.000     |
| ## 'Please specify: (choice=Diabetes)'1                                  | 1.000      |
| ## 'SIRS TEMP'                                                           | 1.000      |
| ## 'Please specify: (choice=Chronic- Hepatitis C)'1                      | 1.000      |
| ##                                                                       |            |
| ## Percent Balance Improvement:                                          |            |
| ##                                                                       | Mean Diff. |
| ## distance                                                              | 51.0257    |
| ## 'Insurance Class'COMM                                                 | 37.8648    |
| ## 'Insurance Class'MEDICAID                                             | 90.8014    |
| ## 'Insurance Class'MEDICARE                                             | 59.0938    |
| ## 'Insurance Class'OTHER                                                | 100.0000   |
| ## 'Insurance Class'SP                                                   | 31.3910    |

|                                                                          |           |
|--------------------------------------------------------------------------|-----------|
| ## 'Race:'American Indian/Alaskan Native                                 | 100.0000  |
| ## 'Race:'Asian                                                          | 100.0000  |
| ## 'Race:'Black                                                          | 100.0000  |
| ## 'Race:'Native Hawaiian/Pacific Isle                                   | 100.0000  |
| ## 'Race:'Other                                                          | 18.8889   |
| ## 'Race:'Unknown                                                        | 59.4895   |
| ## 'Does the patient have a history of cancer?'1                         | 57.1898   |
| ## 'Please specify: (choice=Hypertension)'1                              | -16.9247  |
| ## 'Please specify: (choice=Coronary Artery Disease)'1                   | 74.7928   |
| ## 'Please specify: (choice=Congestive Heart Failure)'1                  | -0.2354   |
| ## 'Please specify: (choice=Asthma)'1                                    | -286.7550 |
| ## 'Please specify: (choice=Chronic Obstructive Pulmonary Disease)'1     | 60.5405   |
| ## 'Please specify: (choice=Chronic Renal Insufficiency)'1               | 100.0000  |
| ## 'Please specify: (choice=Cirrhosis)'1                                 | 100.0000  |
| ## 'Did the patient receive hemodialysis during this admission?'1        | 30.5123   |
| ## 'Was plasma given to the patient during this admission?'1             | 25.6386   |
| ## 'Was the patient placed in a prone position during their admission?'1 | 34.4115   |
| ## 'Age at Admission'                                                    | 54.8893   |
| ## Per_Capita                                                            | 24.4314   |
| ## 'SIRS RR'                                                             | 9.4293    |
| ## SIRS_WBC                                                              | -5.4913   |
| ## SIRS...110                                                            | 89.6834   |
| ## 'Creatinine (if 0 = N/A)'                                             | 51.0185   |
| ## 'Admission Date:'                                                     | 72.1501   |
| ## 'Please specify: (choice=Diabetes)'1                                  | -4.2526   |
| ## 'SIRS TEMP'                                                           | 71.4844   |
| ## 'Please specify: (choice=Chronic- Hepatitis C)'1                      | 0.0000    |
| ##                                                                       | eQQ Med   |
| ## distance                                                              | 48.8867   |
| ## 'Insurance Class'COMM                                                 | 0.0000    |
| ## 'Insurance Class'MEDICAID                                             | 0.0000    |
| ## 'Insurance Class'MEDICARE                                             | 0.0000    |
| ## 'Insurance Class'OTHER                                                | 0.0000    |
| ## 'Insurance Class'SP                                                   | 0.0000    |
| ## 'Race:'American Indian/Alaskan Native                                 | 0.0000    |
| ## 'Race:'Asian                                                          | 0.0000    |
| ## 'Race:'Black                                                          | 0.0000    |
| ## 'Race:'Native Hawaiian/Pacific Isle                                   | 0.0000    |
| ## 'Race:'Other                                                          | 0.0000    |
| ## 'Race:'Unknown                                                        | 0.0000    |
| ## 'Does the patient have a history of cancer?'1                         | 0.0000    |
| ## 'Please specify: (choice=Hypertension)'1                              | 0.0000    |
| ## 'Please specify: (choice=Coronary Artery Disease)'1                   | 0.0000    |
| ## 'Please specify: (choice=Congestive Heart Failure)'1                  | 0.0000    |
| ## 'Please specify: (choice=Asthma)'1                                    | 0.0000    |
| ## 'Please specify: (choice=Chronic Obstructive Pulmonary Disease)'1     | 0.0000    |
| ## 'Please specify: (choice=Chronic Renal Insufficiency)'1               | 0.0000    |
| ## 'Please specify: (choice=Cirrhosis)'1                                 | 0.0000    |
| ## 'Did the patient receive hemodialysis during this admission?'1        | 0.0000    |
| ## 'Was plasma given to the patient during this admission?'1             | 0.0000    |
| ## 'Was the patient placed in a prone position during their admission?'1 | 0.0000    |
| ## 'Age at Admission'                                                    | 25.0000   |
| ## Per_Capita                                                            | 1.1176    |
| ## 'SIRS RR'                                                             | 0.0000    |

|                                                                          |           |
|--------------------------------------------------------------------------|-----------|
| ## SIRS_WBC                                                              | 0.0000    |
| ## SIRS...110                                                            | 0.0000    |
| ## 'Creatinine (if 0 = N/A)'                                             | 0.0000    |
| ## 'Admission Date:'                                                     | 72.7273   |
| ## 'Please specify: (choice=Diabetes)'1                                  | 0.0000    |
| ## 'SIRS TEMP'                                                           | 0.0000    |
| ## 'Please specify: (choice=Chronic- Hepatitis C)'1                      | 0.0000    |
| ##                                                                       | eQQ Mean  |
| ## distance                                                              | 51.1985   |
| ## 'Insurance Class'COMM                                                 | 39.1304   |
| ## 'Insurance Class'MEDICAID                                             | 90.9091   |
| ## 'Insurance Class'MEDICARE                                             | 58.8235   |
| ## 'Insurance Class'OTHER                                                | 100.0000  |
| ## 'Insurance Class'SP                                                   | 50.0000   |
| ## 'Race:'American Indian/Alaskan Native                                 | 0.0000    |
| ## 'Race:'Asian                                                          | 100.0000  |
| ## 'Race:'Black                                                          | 100.0000  |
| ## 'Race:'Native Hawaiian/Pacific Isle                                   | 100.0000  |
| ## 'Race:'Other                                                          | 33.3333   |
| ## 'Race:'Unknown                                                        | 62.5000   |
| ## 'Does the patient have a history of cancer?'1                         | 54.5455   |
| ## 'Please specify: (choice=Hypertension)'1                              | -20.0000  |
| ## 'Please specify: (choice=Coronary Artery Disease)'1                   | 75.0000   |
| ## 'Please specify: (choice=Congestive Heart Failure)'1                  | 0.0000    |
| ## 'Please specify: (choice=Asthma)'1                                    | -300.0000 |
| ## 'Please specify: (choice=Chronic Obstructive Pulmonary Disease)'1     | 60.0000   |
| ## 'Please specify: (choice=Chronic Renal Insufficiency)'1               | 100.0000  |
| ## 'Please specify: (choice=Cirrhosis)'1                                 | 100.0000  |
| ## 'Did the patient receive hemodialysis during this admission?'1        | 31.2500   |
| ## 'Was plasma given to the patient during this admission?'1             | 27.7778   |
| ## 'Was the patient placed in a prone position during their admission?'1 | 35.1351   |
| ## 'Age at Admission'                                                    | 19.9282   |
| ## Per_Capita                                                            | 4.3270    |
| ## 'SIRS RR'                                                             | 20.0000   |
| ## SIRS_WBC                                                              | 0.0000    |
| ## SIRS...110                                                            | 78.9474   |
| ## 'Creatinine (if 0 = N/A)'                                             | -28.5124  |
| ## 'Admission Date:'                                                     | 70.3273   |
| ## 'Please specify: (choice=Diabetes)'1                                  | 0.0000    |
| ## 'SIRS TEMP'                                                           | 72.0000   |
| ## 'Please specify: (choice=Chronic- Hepatitis C)'1                      | 0.0000    |
| ##                                                                       | eQQ Max   |
| ## distance                                                              | 46.9596   |
| ## 'Insurance Class'COMM                                                 | 0.0000    |
| ## 'Insurance Class'MEDICAID                                             | 0.0000    |
| ## 'Insurance Class'MEDICARE                                             | 0.0000    |
| ## 'Insurance Class'OTHER                                                | 100.0000  |
| ## 'Insurance Class'SP                                                   | 0.0000    |
| ## 'Race:'American Indian/Alaskan Native                                 | 0.0000    |
| ## 'Race:'Asian                                                          | 100.0000  |
| ## 'Race:'Black                                                          | 100.0000  |
| ## 'Race:'Native Hawaiian/Pacific Isle                                   | 100.0000  |
| ## 'Race:'Other                                                          | 0.0000    |
| ## 'Race:'Unknown                                                        | 0.0000    |

```

## 'Does the patient have a history of cancer?'1          0.0000
## 'Please specify: (choice=Hypertension)'1              0.0000
## 'Please specify: (choice=Coronary Artery Disease)'1   0.0000
## 'Please specify: (choice=Congestive Heart Failure)'1  0.0000
## 'Please specify: (choice=Asthma)'1                    0.0000
## 'Please specify: (choice=Chronic Obstructive Pulmonary Disease)'1 0.0000
## 'Please specify: (choice=Chronic Renal Insufficiency)'1 100.0000
## 'Please specify: (choice=Cirrhosis)'1                 100.0000
## 'Did the patient receive hemodialysis during this admission?'1 0.0000
## 'Was plasma given to the patient during this admission?'1 0.0000
## 'Was the patient placed in a prone position during their admission?'1 0.0000
## 'Age at Admission'                                   0.0000
## Per_Capita                                           0.0000
## 'SIRS RR'                                             0.0000
## SIRS_WBC                                              0.0000
## SIRS...110                                           0.0000
## 'Creatinine (if 0 = N/A)'                             -47.8261
## 'Admission Date:'                                    55.8824
## 'Please specify: (choice=Diabetes)'1                  0.0000
## 'SIRS TEMP'                                           0.0000
## 'Please specify: (choice=Chronic- Hepatitis C)'1     0.0000
##
## Sample sizes:
##           Control Treated
## All           365    232
## Matched       232    232
## Unmatched     133     0
## Discarded      0     0

```

```
matched.cohort.hcq.2.sirs.2.no.labs = get_matches(my.full.match.hcq.sirs.2.no.labs, hcq.select.no.labs)
```

```

# is there any differene between the groups
binary.variables.hcq.2.sirs.2.no.labs = matched.cohort.hcq.2.sirs.2.no.labs %>%
  dplyr::select(Was.plasma.given.to.the.patient.during.this.admission., Does.the.patient.have.a.history)

chi.p.exit.3.hcq.2.sirs.2.no.labs = vector()
chi.variable.name.3.hcq.2.sirs.2.no.labs = vector()

for ( i in c(1:8,10:11, 13:14)) { # cirrhosis , hep c
  variable.1 = binary.variables.hcq.2.sirs.2.no.labs[[i]][binary.variables.hcq.2.sirs.2.no.labs$COVID.1]
  variable.0 = binary.variables.hcq.2.sirs.2.no.labs[[i]][binary.variables.hcq.2.sirs.2.no.labs$COVID.0]
  chisquare.test = chisq.test(variable.1, variable.0)
  chisquare.test.p.value = chisquare.test$p.value
  chi.p.exit.3.hcq.2.sirs.2.no.labs[i] = chisquare.test.p.value
  chi.variable.name.3.hcq.2.sirs.2.no.labs[i] = colnames(binary.variables.hcq.2.sirs.2.no.labs)[i]
}

```

```
## Warning in chisq.test(variable.1, variable.0): Chi-squared approximation may be
## incorrect
```

```
## Warning in chisq.test(variable.1, variable.0): Chi-squared approximation may be
## incorrect
```

```
## Warning in chisq.test(variable.1, variable.0): Chi-squared approximation may be
```



```

## incorrect

## Warning in chisq.test(variable.1, variable.0): Chi-squared approximation may be
## incorrect

## Warning in chisq.test(variable.1, variable.0): Chi-squared approximation may be
## incorrect

## Warning in chisq.test(variable.1, variable.0): Chi-squared approximation may be
## incorrect

## Warning in chisq.test(variable.1, variable.0): Chi-squared approximation may be
## incorrect

## Warning in chisq.test(variable.1, variable.0): Chi-squared approximation may be
## incorrect

chi.df.3.hcq.2.sirs.2.no.labs = data.frame(chi.variable.name.3.hcq.2.sirs.2.no.labs, chi.p.exit.3.hcq.2
numerical.variables.hcq.2.sirs.2.no.labs = matched.cohort.hcq.2.sirs.2.no.labs %>%
  dplyr::select(COVID..Was.hydroxychloroquine..Plaquenil..given.during.the.patient.s.admission., Age.at
p.value.exit.3.hcq.2.sirs.2.no.labs = vector()
variable.name.exit.3.hcq.2.sirs.2.no.labs = vector()

for ( i in c(2:7, 9:ncol(numerical.variables.hcq.2.sirs.2.no.labs))) { # first column is hcq # skip dat
  variable.1 = numerical.variables.hcq.2.sirs.2.no.labs[[i]][numerical.variables.hcq.2.sirs.2.no.labs$C
  variable.0 = numerical.variables.hcq.2.sirs.2.no.labs[[i]][numerical.variables.hcq.2.sirs.2.no.labs$C
  middle.t.test = t.test(variable.1, variable.0)
  t.test.p.value = middle.t.test$p.value
  p.value.exit.3.hcq.2.sirs.2.no.labs[i] = t.test.p.value
  variable.name.exit.3.hcq.2.sirs.2.no.labs[i] = colnames(numerical.variables.hcq.2.sirs.2.no.labs)[i]
}

t.test.df.hcq.3.sirs.2.no.labs = data.frame(variable.name.exit.3.hcq.2.sirs.2.no.labs, p.value.exit.3.h
match.hcq.2.glm.sirs.2.no.labs = glm(death ~ COVID..Was.hydroxychloroquine..Plaquenil..given.during.the
match.hcq.2.summary.sirs.2.no.labs = summary(match.hcq.2.glm.sirs.2.no.labs) # p 0.0507 ss = 464
match.hcq.2.conf.intervals.sirs.2.no.labs = exp(cbind(coef(match.hcq.2.glm.sirs.2.no.labs), confint(mat

## Waiting for profiling to be done...

# HCQ matching for those with SIRS of 0 or 1
hcq.data.sirs.1 = hcq.data %>%
  filter(SIRS...110 <= 1)
hcq.simple.glm.sirs.1 = glm(death ~ 'COVID- Was hydroxychloroquine (Plaquenil) given during the patient
hcq.simple.summary.sirs.1 = summary(hcq.simple.glm.sirs.1) #p = 3.15e-09
hcq.simple.conf.intervals.sirs.1 = exp(cbind(coef(hcq.simple.glm.sirs.1), confint(hcq.simple.glm.sirs.1

## Waiting for profiling to be done...

```

```

hcq.select.sirs.1 = hcq.data.sirs.1 %>%
  dplyr::select('REDCap Record ID', 'Insurance Class', 'Race:', 'Does the patient have a history of cancer?')

hcq.select.na.sirs.1.na = na.omit(hcq.select.sirs.1) # 114 labs sirs under 2

hcq.select.no.labs.sirs.1 = subset(hcq.select.sirs.1, select = - c(Ferritin, CRP, 'D-Domer'))
hcq.select.no.labs.na.sirs.1 = na.omit(hcq.select.no.labs.sirs.1) # 395 no labs sirs under 2

# sirs less than 2 smaller sample size with labs
row.names(hcq.select.na.sirs.1.na) <- 1:nrow(hcq.select.na.sirs.1.na)

my.hcq.match.sirs.1 = matchit('COVID- Was hydroxychloroquine (Plaquenil) given during the patient's admission?' +
summary(my.hcq.match.sirs.1)

```

```

##
## Call:
## matchit(formula = 'COVID- Was hydroxychloroquine (Plaquenil) given during the patient's admission?' +
##   'Insurance Class' + 'Race:' + 'Does the patient have a history of cancer?' +
##   'Please specify: (choice=Hypertension)' + 'Please specify: (choice=Coronary Artery Disease)' +
##   'Please specify: (choice=Congestive Heart Failure)' +
##   'Please specify: (choice=Asthma)' + 'Please specify: (choice=Chronic Obstructive Pulmonary Disease)' +
##   'Please specify: (choice=Chronic Renal Insufficiency)' +
##   'Please specify: (choice=Cirrhosis)' + 'Did the patient receive hemodialysis during this admission?' +
##   'Was plasma given to the patient during this admission?' +
##   'Was the patient placed in a prone position during their admission?' +
##   'Was plasma given to the patient during this admission?' +
##   'Age at Admission' + Per_Capita + 'SIRS RR' + SIRS_WBC +
##   SIRS...110 + 'Creatinine (if 0 = N/A)' + Ferritin + CRP +
##   'D-Domer' + 'Admission Date:' + 'Please specify: (choice=Diabetes)' +
##   'SIRS TEMP' + 'Please specify: (choice=Chronic- Hepatitis C)',
##   data = hcq.select.na.sirs.1.na, method = "nearest")
##
## Summary of balance for all data:
##
##                                     Means Treated
## distance                                     0.7179
## 'Insurance Class'COMM                                     0.2979
## 'Insurance Class'MEDICAID                               0.2128
## 'Insurance Class'MEDICARE                               0.4894
## 'Insurance Class'OTHER                                   0.0000
## 'Insurance Class'SP                                     0.0000
## 'Race:'American Indian/Alaskan Native                   0.0000
## 'Race:'Asian                                             0.0000
## 'Race:'Black                                             0.1915
## 'Race:'Native Hawaiian/Pacific Isle                     0.0000
## 'Race:'Other                                             0.0851
## 'Race:'Unknown                                           0.0638
## 'Does the patient have a history of cancer?'1           0.1489
## 'Please specify: (choice=Hypertension)'1                 0.6383
## 'Please specify: (choice=Coronary Artery Disease)'1     0.1702
## 'Please specify: (choice=Congestive Heart Failure)'1    0.0213
## 'Please specify: (choice=Asthma)'1                       0.0000
## 'Please specify: (choice=Chronic Obstructive Pulmonary Disease)'1 0.0426
## 'Please specify: (choice=Chronic Renal Insufficiency)'1 0.0638

```

|                                                                          |               |
|--------------------------------------------------------------------------|---------------|
| ## 'Please specify: (choice=Cirrhosis)'1                                 | 0.0000        |
| ## 'Did the patient receive hemodialysis during this admission?'1        | 0.0851        |
| ## 'Was plasma given to the patient during this admission?'1             | 0.1489        |
| ## 'Was the patient placed in a prone position during their admission?'1 | 0.2766        |
| ## 'Age at Admission'                                                    | 67.5957       |
| ## Per_Capita                                                            | 46837.0638    |
| ## 'SIRS RR'                                                             | 0.5745        |
| ## SIRS_WBC                                                              | 0.1064        |
| ## SIRS...110                                                            | 0.8511        |
| ## 'Creatinine (if 0 = N/A)'                                             | 1.0128        |
| ## Ferritin                                                              | 778.3404      |
| ## CRP                                                                   | 131.2681      |
| ## 'D-Domer'                                                             | 6221.0851     |
| ## 'Admission Date:'                                                     | 18358.1064    |
| ## 'Please specify: (choice=Diabetes)'1                                  | 0.4043        |
| ## 'SIRS TEMP'                                                           | 0.0213        |
| ## 'Please specify: (choice=Chronic- Hepatitis C)'1                      | 0.0000        |
| ##                                                                       | Means Control |
| ## distance                                                              | 0.1979        |
| ## 'Insurance Class'COMM                                                 | 0.1194        |
| ## 'Insurance Class'MEDICAID                                             | 0.1045        |
| ## 'Insurance Class'MEDICARE                                             | 0.7761        |
| ## 'Insurance Class'OTHER                                                | 0.0000        |
| ## 'Insurance Class'SP                                                   | 0.0000        |
| ## 'Race:'American Indian/Alaskan Native                                 | 0.0149        |
| ## 'Race:'Asian                                                          | 0.0000        |
| ## 'Race:'Black                                                          | 0.1642        |
| ## 'Race:'Native Hawaiian/Pacific Isle                                   | 0.0000        |
| ## 'Race:'Other                                                          | 0.0597        |
| ## 'Race:'Unknown                                                        | 0.2090        |
| ## 'Does the patient have a history of cancer?'1                         | 0.1791        |
| ## 'Please specify: (choice=Hypertension)'1                              | 0.6418        |
| ## 'Please specify: (choice=Coronary Artery Disease)'1                   | 0.1493        |
| ## 'Please specify: (choice=Congestive Heart Failure)'1                  | 0.0448        |
| ## 'Please specify: (choice=Asthma)'1                                    | 0.0448        |
| ## 'Please specify: (choice=Chronic Obstructive Pulmonary Disease)'1     | 0.0746        |
| ## 'Please specify: (choice=Chronic Renal Insufficiency)'1               | 0.1194        |
| ## 'Please specify: (choice=Cirrhosis)'1                                 | 0.0149        |
| ## 'Did the patient receive hemodialysis during this admission?'1        | 0.0597        |
| ## 'Was plasma given to the patient during this admission?'1             | 0.1493        |
| ## 'Was the patient placed in a prone position during their admission?'1 | 0.0597        |
| ## 'Age at Admission'                                                    | 76.4328       |
| ## Per_Capita                                                            | 50971.4478    |
| ## 'SIRS RR'                                                             | 0.3881        |
| ## SIRS_WBC                                                              | 0.2090        |
| ## SIRS...110                                                            | 0.6716        |
| ## 'Creatinine (if 0 = N/A)'                                             | 1.3299        |
| ## Ferritin                                                              | 2125.6224     |
| ## CRP                                                                   | 105.4612      |
| ## 'D-Domer'                                                             | 5993.7164     |
| ## 'Admission Date:'                                                     | 18370.7313    |
| ## 'Please specify: (choice=Diabetes)'1                                  | 0.3284        |
| ## 'SIRS TEMP'                                                           | 0.0149        |
| ## 'Please specify: (choice=Chronic- Hepatitis C)'1                      | 0.0149        |

|                                                                          | SD Control |
|--------------------------------------------------------------------------|------------|
| ## distance                                                              | 0.2516     |
| ## 'Insurance Class'COMM                                                 | 0.3267     |
| ## 'Insurance Class'MEDICAID                                             | 0.3082     |
| ## 'Insurance Class'MEDICARE                                             | 0.4200     |
| ## 'Insurance Class'OTHER                                                | 0.0000     |
| ## 'Insurance Class'SP                                                   | 0.0000     |
| ## 'Race:'American Indian/Alaskan Native                                 | 0.1222     |
| ## 'Race:'Asian                                                          | 0.0000     |
| ## 'Race:'Black                                                          | 0.3732     |
| ## 'Race:'Native Hawaiian/Pacific Isle                                   | 0.0000     |
| ## 'Race:'Other                                                          | 0.2387     |
| ## 'Race:'Unknown                                                        | 0.4096     |
| ## 'Does the patient have a history of cancer?'1                         | 0.3863     |
| ## 'Please specify: (choice=Hypertension)'1                              | 0.4831     |
| ## 'Please specify: (choice=Coronary Artery Disease)'1                   | 0.3590     |
| ## 'Please specify: (choice=Congestive Heart Failure)'1                  | 0.2084     |
| ## 'Please specify: (choice=Asthma)'1                                    | 0.2084     |
| ## 'Please specify: (choice=Chronic Obstructive Pulmonary Disease)'1     | 0.2648     |
| ## 'Please specify: (choice=Chronic Renal Insufficiency)'1               | 0.3267     |
| ## 'Please specify: (choice=Cirrhosis)'1                                 | 0.1222     |
| ## 'Did the patient receive hemodialysis during this admission?'1        | 0.2387     |
| ## 'Was plasma given to the patient during this admission?'1             | 0.3590     |
| ## 'Was the patient placed in a prone position during their admission?'1 | 0.2387     |
| ## 'Age at Admission'                                                    | 13.7876    |
| ## Per_Capita                                                            | 23665.6119 |
| ## 'SIRS RR'                                                             | 0.4910     |
| ## SIRS_WBC                                                              | 0.4096     |
| ## SIRS...110                                                            | 0.4732     |
| ## 'Creatinine (if 0 = N/A)'                                             | 1.1590     |
| ## Ferritin                                                              | 13344.0588 |
| ## CRP                                                                   | 83.7802    |
| ## 'D-Domer'                                                             | 14124.1249 |
| ## 'Admission Date:'                                                     | 15.2966    |
| ## 'Please specify: (choice=Diabetes)'1                                  | 0.4732     |
| ## 'SIRS TEMP'                                                           | 0.1222     |
| ## 'Please specify: (choice=Chronic- Hepatitis C)'1                      | 0.1222     |
| ##                                                                       | Mean Diff  |
| ## distance                                                              | 0.5200     |
| ## 'Insurance Class'COMM                                                 | 0.1785     |
| ## 'Insurance Class'MEDICAID                                             | 0.1083     |
| ## 'Insurance Class'MEDICARE                                             | -0.2868    |
| ## 'Insurance Class'OTHER                                                | 0.0000     |
| ## 'Insurance Class'SP                                                   | 0.0000     |
| ## 'Race:'American Indian/Alaskan Native                                 | -0.0149    |
| ## 'Race:'Asian                                                          | 0.0000     |
| ## 'Race:'Black                                                          | 0.0273     |
| ## 'Race:'Native Hawaiian/Pacific Isle                                   | 0.0000     |
| ## 'Race:'Other                                                          | 0.0254     |
| ## 'Race:'Unknown                                                        | -0.1451    |
| ## 'Does the patient have a history of cancer?'1                         | -0.0302    |
| ## 'Please specify: (choice=Hypertension)'1                              | -0.0035    |
| ## 'Please specify: (choice=Coronary Artery Disease)'1                   | 0.0210     |
| ## 'Please specify: (choice=Congestive Heart Failure)'1                  | -0.0235    |

|                                                                          |            |
|--------------------------------------------------------------------------|------------|
| ## 'Please specify: (choice=Asthma)'1                                    | -0.0448    |
| ## 'Please specify: (choice=Chronic Obstructive Pulmonary Disease)'1     | -0.0321    |
| ## 'Please specify: (choice=Chronic Renal Insufficiency)'1               | -0.0556    |
| ## 'Please specify: (choice=Cirrhosis)'1                                 | -0.0149    |
| ## 'Did the patient receive hemodialysis during this admission?'1        | 0.0254     |
| ## 'Was plasma given to the patient during this admission?'1             | -0.0003    |
| ## 'Was the patient placed in a prone position during their admission?'1 | 0.2169     |
| ## 'Age at Admission'                                                    | -8.8371    |
| ## Per_Capita                                                            | -4134.3839 |
| ## 'SIRS RR'                                                             | 0.1864     |
| ## SIRS_WBC                                                              | -0.1026    |
| ## SIRS...110                                                            | 0.1794     |
| ## 'Creatinine (if 0 = N/A)'                                             | -0.3171    |
| ## Ferritin                                                              | -1347.2820 |
| ## CRP                                                                   | 25.8069    |
| ## 'D-Domer'                                                             | 227.3687   |
| ## 'Admission Date:'                                                     | -12.6250   |
| ## 'Please specify: (choice=Diabetes)'1                                  | 0.0759     |
| ## 'SIRS TEMP'                                                           | 0.0064     |
| ## 'Please specify: (choice=Chronic- Hepatitis C)'1                      | -0.0149    |
| ##                                                                       | eQQ Med    |
| ## distance                                                              | 0.5943     |
| ## 'Insurance Class'COMM                                                 | 0.0000     |
| ## 'Insurance Class'MEDICAID                                             | 0.0000     |
| ## 'Insurance Class'MEDICARE                                             | 0.0000     |
| ## 'Insurance Class'OTHER                                                | 0.0000     |
| ## 'Insurance Class'SP                                                   | 0.0000     |
| ## 'Race:'American Indian/Alaskan Native                                 | 0.0000     |
| ## 'Race:'Asian                                                          | 0.0000     |
| ## 'Race:'Black                                                          | 0.0000     |
| ## 'Race:'Native Hawaiian/Pacific Isle                                   | 0.0000     |
| ## 'Race:'Other                                                          | 0.0000     |
| ## 'Race:'Unknown                                                        | 0.0000     |
| ## 'Does the patient have a history of cancer?'1                         | 0.0000     |
| ## 'Please specify: (choice=Hypertension)'1                              | 0.0000     |
| ## 'Please specify: (choice=Coronary Artery Disease)'1                   | 0.0000     |
| ## 'Please specify: (choice=Congestive Heart Failure)'1                  | 0.0000     |
| ## 'Please specify: (choice=Asthma)'1                                    | 0.0000     |
| ## 'Please specify: (choice=Chronic Obstructive Pulmonary Disease)'1     | 0.0000     |
| ## 'Please specify: (choice=Chronic Renal Insufficiency)'1               | 0.0000     |
| ## 'Please specify: (choice=Cirrhosis)'1                                 | 0.0000     |
| ## 'Did the patient receive hemodialysis during this admission?'1        | 0.0000     |
| ## 'Was plasma given to the patient during this admission?'1             | 0.0000     |
| ## 'Was the patient placed in a prone position during their admission?'1 | 0.0000     |
| ## 'Age at Admission'                                                    | 9.0000     |
| ## Per_Capita                                                            | 2174.0000  |
| ## 'SIRS RR'                                                             | 0.0000     |
| ## SIRS_WBC                                                              | 0.0000     |
| ## SIRS...110                                                            | 0.0000     |
| ## 'Creatinine (if 0 = N/A)'                                             | 0.1000     |
| ## Ferritin                                                              | 285.0000   |
| ## CRP                                                                   | 24.6000    |
| ## 'D-Domer'                                                             | 752.0000   |
| ## 'Admission Date:'                                                     | 11.0000    |

|                                                                          |           |
|--------------------------------------------------------------------------|-----------|
| ## 'Please specify: (choice=Diabetes)'1                                  | 0.0000    |
| ## 'SIRS TEMP'                                                           | 0.0000    |
| ## 'Please specify: (choice=Chronic- Hepatitis C)'1                      | 0.0000    |
| ##                                                                       | eQQ Mean  |
| ## distance                                                              | 0.5237    |
| ## 'Insurance Class'COMM                                                 | 0.1915    |
| ## 'Insurance Class'MEDICAID                                             | 0.1064    |
| ## 'Insurance Class'MEDICARE                                             | 0.2766    |
| ## 'Insurance Class'OTHER                                                | 0.0000    |
| ## 'Insurance Class'SP                                                   | 0.0000    |
| ## 'Race:'American Indian/Alaskan Native                                 | 0.0213    |
| ## 'Race:'Asian                                                          | 0.0000    |
| ## 'Race:'Black                                                          | 0.0426    |
| ## 'Race:'Native Hawaiian/Pacific Isle                                   | 0.0000    |
| ## 'Race:'Other                                                          | 0.0213    |
| ## 'Race:'Unknown                                                        | 0.1489    |
| ## 'Does the patient have a history of cancer?'1                         | 0.0213    |
| ## 'Please specify: (choice=Hypertension)'1                              | 0.0000    |
| ## 'Please specify: (choice=Coronary Artery Disease)'1                   | 0.0213    |
| ## 'Please specify: (choice=Congestive Heart Failure)'1                  | 0.0213    |
| ## 'Please specify: (choice=Asthma)'1                                    | 0.0426    |
| ## 'Please specify: (choice=Chronic Obstructive Pulmonary Disease)'1     | 0.0213    |
| ## 'Please specify: (choice=Chronic Renal Insufficiency)'1               | 0.0426    |
| ## 'Please specify: (choice=Cirrhosis)'1                                 | 0.0213    |
| ## 'Did the patient receive hemodialysis during this admission?'1        | 0.0213    |
| ## 'Was plasma given to the patient during this admission?'1             | 0.0000    |
| ## 'Was the patient placed in a prone position during their admission?'1 | 0.2128    |
| ## 'Age at Admission'                                                    | 8.3830    |
| ## Per_Capita                                                            | 5107.4043 |
| ## 'SIRS RR'                                                             | 0.1915    |
| ## SIRS_WBC                                                              | 0.1064    |
| ## SIRS...110                                                            | 0.1915    |
| ## 'Creatinine (if 0 = N/A)'                                             | 0.3362    |
| ## Ferritin                                                              | 2573.9723 |
| ## CRP                                                                   | 27.8745   |
| ## 'D-Domer'                                                             | 1747.2979 |
| ## 'Admission Date:'                                                     | 12.2766   |
| ## 'Please specify: (choice=Diabetes)'1                                  | 0.0851    |
| ## 'SIRS TEMP'                                                           | 0.0000    |
| ## 'Please specify: (choice=Chronic- Hepatitis C)'1                      | 0.0213    |
| ##                                                                       | eQQ Max   |
| ## distance                                                              | 0.7134    |
| ## 'Insurance Class'COMM                                                 | 1.0000    |
| ## 'Insurance Class'MEDICAID                                             | 1.0000    |
| ## 'Insurance Class'MEDICARE                                             | 1.0000    |
| ## 'Insurance Class'OTHER                                                | 0.0000    |
| ## 'Insurance Class'SP                                                   | 0.0000    |
| ## 'Race:'American Indian/Alaskan Native                                 | 1.0000    |
| ## 'Race:'Asian                                                          | 0.0000    |
| ## 'Race:'Black                                                          | 1.0000    |
| ## 'Race:'Native Hawaiian/Pacific Isle                                   | 0.0000    |
| ## 'Race:'Other                                                          | 1.0000    |
| ## 'Race:'Unknown                                                        | 1.0000    |
| ## 'Does the patient have a history of cancer?'1                         | 1.0000    |

|                                                                          |               |
|--------------------------------------------------------------------------|---------------|
| ## 'Please specify: (choice=Hypertension)'1                              | 0.0000        |
| ## 'Please specify: (choice=Coronary Artery Disease)'1                   | 1.0000        |
| ## 'Please specify: (choice=Congestive Heart Failure)'1                  | 1.0000        |
| ## 'Please specify: (choice=Asthma)'1                                    | 1.0000        |
| ## 'Please specify: (choice=Chronic Obstructive Pulmonary Disease)'1     | 1.0000        |
| ## 'Please specify: (choice=Chronic Renal Insufficiency)'1               | 1.0000        |
| ## 'Please specify: (choice=Cirrhosis)'1                                 | 1.0000        |
| ## 'Did the patient receive hemodialysis during this admission?'1        | 1.0000        |
| ## 'Was plasma given to the patient during this admission?'1             | 0.0000        |
| ## 'Was the patient placed in a prone position during their admission?'1 | 1.0000        |
| ## 'Age at Admission'                                                    | 15.0000       |
| ## Per_Capita                                                            | 42630.0000    |
| ## 'SIRS RR'                                                             | 1.0000        |
| ## SIRS_WBC                                                              | 1.0000        |
| ## SIRS...110                                                            | 1.0000        |
| ## 'Creatinine (if 0 = N/A)'                                             | 2.7000        |
| ## Ferritin                                                              | 108079.7000   |
| ## CRP                                                                   | 94.9000       |
| ## 'D-Domer'                                                             | 14997.0000    |
| ## 'Admission Date:'                                                     | 29.0000       |
| ## 'Please specify: (choice=Diabetes)'1                                  | 1.0000        |
| ## 'SIRS TEMP'                                                           | 0.0000        |
| ## 'Please specify: (choice=Chronic- Hepatitis C)'1                      | 1.0000        |
| ##                                                                       |               |
| ##                                                                       |               |
| ## Summary of balance for matched data:                                  |               |
| ##                                                                       | Means Treated |
| ## distance                                                              | 0.7179        |
| ## 'Insurance Class'COMM                                                 | 0.2979        |
| ## 'Insurance Class'MEDICAID                                             | 0.2128        |
| ## 'Insurance Class'MEDICARE                                             | 0.4894        |
| ## 'Insurance Class'OTHER                                                | 0.0000        |
| ## 'Insurance Class'SP                                                   | 0.0000        |
| ## 'Race:'American Indian/Alaskan Native                                 | 0.0000        |
| ## 'Race:'Asian                                                          | 0.0000        |
| ## 'Race:'Black                                                          | 0.1915        |
| ## 'Race:'Native Hawaiian/Pacific Isle                                   | 0.0000        |
| ## 'Race:'Other                                                          | 0.0851        |
| ## 'Race:'Unknown                                                        | 0.0638        |
| ## 'Does the patient have a history of cancer?'1                         | 0.1489        |
| ## 'Please specify: (choice=Hypertension)'1                              | 0.6383        |
| ## 'Please specify: (choice=Coronary Artery Disease)'1                   | 0.1702        |
| ## 'Please specify: (choice=Congestive Heart Failure)'1                  | 0.0213        |
| ## 'Please specify: (choice=Asthma)'1                                    | 0.0000        |
| ## 'Please specify: (choice=Chronic Obstructive Pulmonary Disease)'1     | 0.0426        |
| ## 'Please specify: (choice=Chronic Renal Insufficiency)'1               | 0.0638        |
| ## 'Please specify: (choice=Cirrhosis)'1                                 | 0.0000        |
| ## 'Did the patient receive hemodialysis during this admission?'1        | 0.0851        |
| ## 'Was plasma given to the patient during this admission?'1             | 0.1489        |
| ## 'Was the patient placed in a prone position during their admission?'1 | 0.2766        |
| ## 'Age at Admission'                                                    | 67.5957       |
| ## Per_Capita                                                            | 46837.0638    |
| ## 'SIRS RR'                                                             | 0.5745        |
| ## SIRS_WBC                                                              | 0.1064        |

|                                                                          |               |
|--------------------------------------------------------------------------|---------------|
| ## SIRS...110                                                            | 0.8511        |
| ## 'Creatinine (if 0 = N/A)'                                             | 1.0128        |
| ## Ferritin                                                              | 778.3404      |
| ## CRP                                                                   | 131.2681      |
| ## 'D-Domer'                                                             | 6221.0851     |
| ## 'Admission Date:'                                                     | 18358.1064    |
| ## 'Please specify: (choice=Diabetes)'1                                  | 0.4043        |
| ## 'SIRS TEMP'                                                           | 0.0213        |
| ## 'Please specify: (choice=Chronic- Hepatitis C)'1                      | 0.0000        |
| ##                                                                       | Means Control |
| ## distance                                                              | 0.2816        |
| ## 'Insurance Class'COMM                                                 | 0.1489        |
| ## 'Insurance Class'MEDICAID                                             | 0.1277        |
| ## 'Insurance Class'MEDICARE                                             | 0.7234        |
| ## 'Insurance Class'OTHER                                                | 0.0000        |
| ## 'Insurance Class'SP                                                   | 0.0000        |
| ## 'Race:'American Indian/Alaskan Native                                 | 0.0000        |
| ## 'Race:'Asian                                                          | 0.0000        |
| ## 'Race:'Black                                                          | 0.1489        |
| ## 'Race:'Native Hawaiian/Pacific Isle                                   | 0.0000        |
| ## 'Race:'Other                                                          | 0.0851        |
| ## 'Race:'Unknown                                                        | 0.1489        |
| ## 'Does the patient have a history of cancer?'1                         | 0.1702        |
| ## 'Please specify: (choice=Hypertension)'1                              | 0.6170        |
| ## 'Please specify: (choice=Coronary Artery Disease)'1                   | 0.2128        |
| ## 'Please specify: (choice=Congestive Heart Failure)'1                  | 0.0426        |
| ## 'Please specify: (choice=Asthma)'1                                    | 0.0000        |
| ## 'Please specify: (choice=Chronic Obstructive Pulmonary Disease)'1     | 0.0426        |
| ## 'Please specify: (choice=Chronic Renal Insufficiency)'1               | 0.1064        |
| ## 'Please specify: (choice=Cirrhosis)'1                                 | 0.0000        |
| ## 'Did the patient receive hemodialysis during this admission?'1        | 0.0426        |
| ## 'Was plasma given to the patient during this admission?'1             | 0.1277        |
| ## 'Was the patient placed in a prone position during their admission?'1 | 0.0851        |
| ## 'Age at Admission'                                                    | 75.2553       |
| ## Per_Capita                                                            | 54522.8298    |
| ## 'SIRS RR'                                                             | 0.4468        |
| ## SIRS_WBC                                                              | 0.1915        |
| ## SIRS...110                                                            | 0.7234        |
| ## 'Creatinine (if 0 = N/A)'                                             | 1.1851        |
| ## Ferritin                                                              | 2827.6532     |
| ## CRP                                                                   | 113.9617      |
| ## 'D-Domer'                                                             | 5434.9787     |
| ## 'Admission Date:'                                                     | 18366.7234    |
| ## 'Please specify: (choice=Diabetes)'1                                  | 0.4043        |
| ## 'SIRS TEMP'                                                           | 0.0213        |
| ## 'Please specify: (choice=Chronic- Hepatitis C)'1                      | 0.0000        |
| ##                                                                       | SD Control    |
| ## distance                                                              | 0.2585        |
| ## 'Insurance Class'COMM                                                 | 0.3599        |
| ## 'Insurance Class'MEDICAID                                             | 0.3373        |
| ## 'Insurance Class'MEDICARE                                             | 0.4522        |
| ## 'Insurance Class'OTHER                                                | 0.0000        |
| ## 'Insurance Class'SP                                                   | 0.0000        |
| ## 'Race:'American Indian/Alaskan Native                                 | 0.0000        |



|                                                                          |            |
|--------------------------------------------------------------------------|------------|
| ## 'Race:'Asian                                                          | 0.0000     |
| ## 'Race:'Black                                                          | 0.3599     |
| ## 'Race:'Native Hawaiian/Pacific Isle                                   | 0.0000     |
| ## 'Race:'Other                                                          | 0.2821     |
| ## 'Race:'Unknown                                                        | 0.3599     |
| ## 'Does the patient have a history of cancer?'1                         | 0.3799     |
| ## 'Please specify: (choice=Hypertension)'1                              | 0.4914     |
| ## 'Please specify: (choice=Coronary Artery Disease)'1                   | 0.4137     |
| ## 'Please specify: (choice=Congestive Heart Failure)'1                  | 0.2040     |
| ## 'Please specify: (choice=Asthma)'1                                    | 0.0000     |
| ## 'Please specify: (choice=Chronic Obstructive Pulmonary Disease)'1     | 0.2040     |
| ## 'Please specify: (choice=Chronic Renal Insufficiency)'1               | 0.3117     |
| ## 'Please specify: (choice=Cirrhosis)'1                                 | 0.0000     |
| ## 'Did the patient receive hemodialysis during this admission?'1        | 0.2040     |
| ## 'Was plasma given to the patient during this admission?'1             | 0.3373     |
| ## 'Was the patient placed in a prone position during their admission?'1 | 0.2821     |
| ## 'Age at Admission'                                                    | 14.6991    |
| ## Per_Capita                                                            | 25827.9842 |
| ## 'SIRS RR'                                                             | 0.5025     |
| ## SIRS_WBC                                                              | 0.3977     |
| ## SIRS...110                                                            | 0.4522     |
| ## 'Creatinine (if 0 = N/A)'                                             | 0.9215     |
| ## Ferritin                                                              | 15929.3616 |
| ## CRP                                                                   | 81.6706    |
| ## 'D-Domer'                                                             | 10686.6349 |
| ## 'Admission Date:'                                                     | 14.0862    |
| ## 'Please specify: (choice=Diabetes)'1                                  | 0.4961     |
| ## 'SIRS TEMP'                                                           | 0.1459     |
| ## 'Please specify: (choice=Chronic- Hepatitis C)'1                      | 0.0000     |
| ##                                                                       | Mean Diff  |
| ## distance                                                              | 0.4363     |
| ## 'Insurance Class'COMM                                                 | 0.1489     |
| ## 'Insurance Class'MEDICAID                                             | 0.0851     |
| ## 'Insurance Class'MEDICARE                                             | -0.2340    |
| ## 'Insurance Class'OTHER                                                | 0.0000     |
| ## 'Insurance Class'SP                                                   | 0.0000     |
| ## 'Race:'American Indian/Alaskan Native                                 | 0.0000     |
| ## 'Race:'Asian                                                          | 0.0000     |
| ## 'Race:'Black                                                          | 0.0426     |
| ## 'Race:'Native Hawaiian/Pacific Isle                                   | 0.0000     |
| ## 'Race:'Other                                                          | 0.0000     |
| ## 'Race:'Unknown                                                        | -0.0851    |
| ## 'Does the patient have a history of cancer?'1                         | -0.0213    |
| ## 'Please specify: (choice=Hypertension)'1                              | 0.0213     |
| ## 'Please specify: (choice=Coronary Artery Disease)'1                   | -0.0426    |
| ## 'Please specify: (choice=Congestive Heart Failure)'1                  | -0.0213    |
| ## 'Please specify: (choice=Asthma)'1                                    | 0.0000     |
| ## 'Please specify: (choice=Chronic Obstructive Pulmonary Disease)'1     | 0.0000     |
| ## 'Please specify: (choice=Chronic Renal Insufficiency)'1               | -0.0426    |
| ## 'Please specify: (choice=Cirrhosis)'1                                 | 0.0000     |
| ## 'Did the patient receive hemodialysis during this admission?'1        | 0.0426     |
| ## 'Was plasma given to the patient during this admission?'1             | 0.0213     |
| ## 'Was the patient placed in a prone position during their admission?'1 | 0.1915     |
| ## 'Age at Admission'                                                    | -7.6596    |

|                                                                         |            |
|-------------------------------------------------------------------------|------------|
| ## Per_Capita                                                           | -7685.7660 |
| ## 'SIRS RR'                                                            | 0.1277     |
| ## SIRS_WBC                                                             | -0.0851    |
| ## SIRS...110                                                           | 0.1277     |
| ## 'Creatinine (if 0 = N/A)'                                            | -0.1723    |
| ## Ferritin                                                             | -2049.3128 |
| ## CRP                                                                  | 17.3064    |
| ## 'D-Domer'                                                            | 786.1064   |
| ## 'Admission Date:'                                                    | -8.6170    |
| ## 'Please specify: (choice=Diabetes)'                                  | 0.0000     |
| ## 'SIRS TEMP'                                                          | 0.0000     |
| ## 'Please specify: (choice=Chronic- Hepatitis C)'                      | 0.0000     |
| ##                                                                      | eQQ Med    |
| ## distance                                                             | 0.4812     |
| ## 'Insurance Class'COMM                                                | 0.0000     |
| ## 'Insurance Class'MEDICAID                                            | 0.0000     |
| ## 'Insurance Class'MEDICARE                                            | 0.0000     |
| ## 'Insurance Class'OTHER                                               | 0.0000     |
| ## 'Insurance Class'SP                                                  | 0.0000     |
| ## 'Race:'American Indian/Alaskan Native                                | 0.0000     |
| ## 'Race:'Asian                                                         | 0.0000     |
| ## 'Race:'Black                                                         | 0.0000     |
| ## 'Race:'Native Hawaiian/Pacific Isle                                  | 0.0000     |
| ## 'Race:'Other                                                         | 0.0000     |
| ## 'Race:'Unknown                                                       | 0.0000     |
| ## 'Does the patient have a history of cancer?'                         | 0.0000     |
| ## 'Please specify: (choice=Hypertension)'                              | 0.0000     |
| ## 'Please specify: (choice=Coronary Artery Disease)'                   | 0.0000     |
| ## 'Please specify: (choice=Congestive Heart Failure)'                  | 0.0000     |
| ## 'Please specify: (choice=Asthma)'                                    | 0.0000     |
| ## 'Please specify: (choice=Chronic Obstructive Pulmonary Disease)'     | 0.0000     |
| ## 'Please specify: (choice=Chronic Renal Insufficiency)'               | 0.0000     |
| ## 'Please specify: (choice=Cirrhosis)'                                 | 0.0000     |
| ## 'Did the patient receive hemodialysis during this admission?'        | 0.0000     |
| ## 'Was plasma given to the patient during this admission?'             | 0.0000     |
| ## 'Was the patient placed in a prone position during their admission?' | 0.0000     |
| ## 'Age at Admission'                                                   | 8.0000     |
| ## Per_Capita                                                           | 3718.0000  |
| ## 'SIRS RR'                                                            | 0.0000     |
| ## SIRS_WBC                                                             | 0.0000     |
| ## SIRS...110                                                           | 0.0000     |
| ## 'Creatinine (if 0 = N/A)'                                            | 0.1000     |
| ## Ferritin                                                             | 284.0000   |
| ## CRP                                                                  | 17.7000    |
| ## 'D-Domer'                                                            | 1023.0000  |
| ## 'Admission Date:'                                                    | 7.0000     |
| ## 'Please specify: (choice=Diabetes)'                                  | 0.0000     |
| ## 'SIRS TEMP'                                                          | 0.0000     |
| ## 'Please specify: (choice=Chronic- Hepatitis C)'                      | 0.0000     |
| ##                                                                      | eQQ Mean   |
| ## distance                                                             | 0.4363     |
| ## 'Insurance Class'COMM                                                | 0.1489     |
| ## 'Insurance Class'MEDICAID                                            | 0.0851     |
| ## 'Insurance Class'MEDICARE                                            | 0.2340     |

|                                                                          |           |
|--------------------------------------------------------------------------|-----------|
| ## 'Insurance Class'OTHER                                                | 0.0000    |
| ## 'Insurance Class'SP                                                   | 0.0000    |
| ## 'Race:'American Indian/Alaskan Native                                 | 0.0000    |
| ## 'Race:'Asian                                                          | 0.0000    |
| ## 'Race:'Black                                                          | 0.0426    |
| ## 'Race:'Native Hawaiian/Pacific Isle                                   | 0.0000    |
| ## 'Race:'Other                                                          | 0.0000    |
| ## 'Race:'Unknown                                                        | 0.0851    |
| ## 'Does the patient have a history of cancer?'1                         | 0.0213    |
| ## 'Please specify: (choice=Hypertension)'1                              | 0.0213    |
| ## 'Please specify: (choice=Coronary Artery Disease)'1                   | 0.0426    |
| ## 'Please specify: (choice=Congestive Heart Failure)'1                  | 0.0213    |
| ## 'Please specify: (choice=Asthma)'1                                    | 0.0000    |
| ## 'Please specify: (choice=Chronic Obstructive Pulmonary Disease)'1     | 0.0000    |
| ## 'Please specify: (choice=Chronic Renal Insufficiency)'1               | 0.0426    |
| ## 'Please specify: (choice=Cirrhosis)'1                                 | 0.0000    |
| ## 'Did the patient receive hemodialysis during this admission?'1        | 0.0426    |
| ## 'Was plasma given to the patient during this admission?'1             | 0.0213    |
| ## 'Was the patient placed in a prone position during their admission?'1 | 0.1915    |
| ## 'Age at Admission'                                                    | 7.6596    |
| ## Per_Capita                                                            | 8337.4681 |
| ## 'SIRS RR'                                                             | 0.1277    |
| ## SIRS_WBC                                                              | 0.0851    |
| ## SIRS...110                                                            | 0.1277    |
| ## 'Creatinine (if 0 = N/A)'                                             | 0.2106    |
| ## Ferritin                                                              | 2549.8234 |
| ## CRP                                                                   | 19.7617   |
| ## 'D-Domer'                                                             | 2380.4894 |
| ## 'Admission Date:'                                                     | 8.6170    |
| ## 'Please specify: (choice=Diabetes)'1                                  | 0.0000    |
| ## 'SIRS TEMP'                                                           | 0.0000    |
| ## 'Please specify: (choice=Chronic- Hepatitis C)'1                      | 0.0000    |
| ##                                                                       | eQQ Max   |
| ## distance                                                              | 0.6025    |
| ## 'Insurance Class'COMM                                                 | 1.0000    |
| ## 'Insurance Class'MEDICAID                                             | 1.0000    |
| ## 'Insurance Class'MEDICARE                                             | 1.0000    |
| ## 'Insurance Class'OTHER                                                | 0.0000    |
| ## 'Insurance Class'SP                                                   | 0.0000    |
| ## 'Race:'American Indian/Alaskan Native                                 | 0.0000    |
| ## 'Race:'Asian                                                          | 0.0000    |
| ## 'Race:'Black                                                          | 1.0000    |
| ## 'Race:'Native Hawaiian/Pacific Isle                                   | 0.0000    |
| ## 'Race:'Other                                                          | 0.0000    |
| ## 'Race:'Unknown                                                        | 1.0000    |
| ## 'Does the patient have a history of cancer?'1                         | 1.0000    |
| ## 'Please specify: (choice=Hypertension)'1                              | 1.0000    |
| ## 'Please specify: (choice=Coronary Artery Disease)'1                   | 1.0000    |
| ## 'Please specify: (choice=Congestive Heart Failure)'1                  | 1.0000    |
| ## 'Please specify: (choice=Asthma)'1                                    | 0.0000    |
| ## 'Please specify: (choice=Chronic Obstructive Pulmonary Disease)'1     | 0.0000    |
| ## 'Please specify: (choice=Chronic Renal Insufficiency)'1               | 1.0000    |
| ## 'Please specify: (choice=Cirrhosis)'1                                 | 0.0000    |
| ## 'Did the patient receive hemodialysis during this admission?'1        | 1.0000    |

|                                                                          |             |
|--------------------------------------------------------------------------|-------------|
| ## 'Was plasma given to the patient during this admission?'1             | 1.0000      |
| ## 'Was the patient placed in a prone position during their admission?'1 | 1.0000      |
| ## 'Age at Admission'                                                    | 16.0000     |
| ## Per_Capita                                                            | 42630.0000  |
| ## 'SIRS RR'                                                             | 1.0000      |
| ## SIRS_WBC                                                              | 1.0000      |
| ## SIRS...110                                                            | 1.0000      |
| ## 'Creatinine (if 0 = N/A)'                                             | 2.4000      |
| ## Ferritin                                                              | 108079.7000 |
| ## CRP                                                                   | 93.9000     |
| ## 'D-Domer'                                                             | 38497.0000  |
| ## 'Admission Date:'                                                     | 23.0000     |
| ## 'Please specify: (choice=Diabetes)'1                                  | 0.0000      |
| ## 'SIRS TEMP'                                                           | 0.0000      |
| ## 'Please specify: (choice=Chronic- Hepatitis C)'1                      | 0.0000      |
| ##                                                                       |             |
| ## Percent Balance Improvement:                                          |             |
| ##                                                                       | Mean Diff.  |
| ## distance                                                              | 16.0920     |
| ## 'Insurance Class'COMM                                                 | 16.5480     |
| ## 'Insurance Class'MEDICAID                                             | 21.4076     |
| ## 'Insurance Class'MEDICARE                                             | 18.3832     |
| ## 'Insurance Class'OTHER                                                | 0.0000      |
| ## 'Insurance Class'SP                                                   | 0.0000      |
| ## 'Race:'American Indian/Alaskan Native                                 | 100.0000    |
| ## 'Race:'Asian                                                          | 0.0000      |
| ## 'Race:'Black                                                          | -55.8140    |
| ## 'Race:'Native Hawaiian/Pacific Isle                                   | 0.0000      |
| ## 'Race:'Other                                                          | 100.0000    |
| ## 'Race:'Unknown                                                        | 41.3567     |
| ## 'Does the patient have a history of cancer?'1                         | 29.4737     |
| ## 'Please specify: (choice=Hypertension)'1                              | -509.0909   |
| ## 'Please specify: (choice=Coronary Artery Disease)'1                   | -103.0303   |
| ## 'Please specify: (choice=Congestive Heart Failure)'1                  | 9.4595      |
| ## 'Please specify: (choice=Asthma)'1                                    | 100.0000    |
| ## 'Please specify: (choice=Chronic Obstructive Pulmonary Disease)'1     | 100.0000    |
| ## 'Please specify: (choice=Chronic Renal Insufficiency)'1               | 23.4286     |
| ## 'Please specify: (choice=Cirrhosis)'1                                 | 100.0000    |
| ## 'Did the patient receive hemodialysis during this admission?'1        | -67.5000    |
| ## 'Was plasma given to the patient during this admission?'1             | -6600.0000  |
| ## 'Was the patient placed in a prone position during their admission?'1 | 11.7130     |
| ## 'Age at Admission'                                                    | 13.3247     |
| ## Per_Capita                                                            | -85.8987    |
| ## 'SIRS RR'                                                             | 31.5162     |
| ## SIRS_WBC                                                              | 17.0279     |
| ## SIRS...110                                                            | 28.8496     |
| ## 'Creatinine (if 0 = N/A)'                                             | 45.6485     |
| ## Ferritin                                                              | -52.1072    |
| ## CRP                                                                   | 32.9389     |
| ## 'D-Domer'                                                             | -245.7408   |
| ## 'Admission Date:'                                                     | 31.7462     |
| ## 'Please specify: (choice=Diabetes)'1                                  | 100.0000    |
| ## 'SIRS TEMP'                                                           | 100.0000    |
| ## 'Please specify: (choice=Chronic- Hepatitis C)'1                      | 100.0000    |

|                                                                          |           |
|--------------------------------------------------------------------------|-----------|
| ##                                                                       | eQQ Med   |
| ## distance                                                              | 19.0233   |
| ## 'Insurance Class'COMM                                                 | 0.0000    |
| ## 'Insurance Class'MEDICAID                                             | 0.0000    |
| ## 'Insurance Class'MEDICARE                                             | 0.0000    |
| ## 'Insurance Class'OTHER                                                | 0.0000    |
| ## 'Insurance Class'SP                                                   | 0.0000    |
| ## 'Race:'American Indian/Alaskan Native                                 | 0.0000    |
| ## 'Race:'Asian                                                          | 0.0000    |
| ## 'Race:'Black                                                          | 0.0000    |
| ## 'Race:'Native Hawaiian/Pacific Isle                                   | 0.0000    |
| ## 'Race:'Other                                                          | 0.0000    |
| ## 'Race:'Unknown                                                        | 0.0000    |
| ## 'Does the patient have a history of cancer?'1                         | 0.0000    |
| ## 'Please specify: (choice=Hypertension)'1                              | 0.0000    |
| ## 'Please specify: (choice=Coronary Artery Disease)'1                   | 0.0000    |
| ## 'Please specify: (choice=Congestive Heart Failure)'1                  | 0.0000    |
| ## 'Please specify: (choice=Asthma)'1                                    | 0.0000    |
| ## 'Please specify: (choice=Chronic Obstructive Pulmonary Disease)'1     | 0.0000    |
| ## 'Please specify: (choice=Chronic Renal Insufficiency)'1               | 0.0000    |
| ## 'Please specify: (choice=Cirrhosis)'1                                 | 0.0000    |
| ## 'Did the patient receive hemodialysis during this admission?'1        | 0.0000    |
| ## 'Was plasma given to the patient during this admission?'1             | 0.0000    |
| ## 'Was the patient placed in a prone position during their admission?'1 | 0.0000    |
| ## 'Age at Admission'                                                    | 11.1111   |
| ## Per_Capita                                                            | -71.0212  |
| ## 'SIRS RR'                                                             | 0.0000    |
| ## SIRS_WBC                                                              | 0.0000    |
| ## SIRS...110                                                            | 0.0000    |
| ## 'Creatinine (if 0 = N/A)'                                             | 0.0000    |
| ## Ferritin                                                              | 0.3509    |
| ## CRP                                                                   | 28.0488   |
| ## 'D-Domer'                                                             | -36.0372  |
| ## 'Admission Date:'                                                     | 36.3636   |
| ## 'Please specify: (choice=Diabetes)'1                                  | 0.0000    |
| ## 'SIRS TEMP'                                                           | 0.0000    |
| ## 'Please specify: (choice=Chronic- Hepatitis C)'1                      | 0.0000    |
| ##                                                                       | eQQ Mean  |
| ## distance                                                              | 16.6810   |
| ## 'Insurance Class'COMM                                                 | 22.2222   |
| ## 'Insurance Class'MEDICAID                                             | 20.0000   |
| ## 'Insurance Class'MEDICARE                                             | 15.3846   |
| ## 'Insurance Class'OTHER                                                | 0.0000    |
| ## 'Insurance Class'SP                                                   | 0.0000    |
| ## 'Race:'American Indian/Alaskan Native                                 | 100.0000  |
| ## 'Race:'Asian                                                          | 0.0000    |
| ## 'Race:'Black                                                          | 0.0000    |
| ## 'Race:'Native Hawaiian/Pacific Isle                                   | 0.0000    |
| ## 'Race:'Other                                                          | 100.0000  |
| ## 'Race:'Unknown                                                        | 42.8571   |
| ## 'Does the patient have a history of cancer?'1                         | 0.0000    |
| ## 'Please specify: (choice=Hypertension)'1                              | -Inf      |
| ## 'Please specify: (choice=Coronary Artery Disease)'1                   | -100.0000 |
| ## 'Please specify: (choice=Congestive Heart Failure)'1                  | 0.0000    |

|                                                                          |           |
|--------------------------------------------------------------------------|-----------|
| ## 'Please specify: (choice=Asthma)'1                                    | 100.0000  |
| ## 'Please specify: (choice=Chronic Obstructive Pulmonary Disease)'1     | 100.0000  |
| ## 'Please specify: (choice=Chronic Renal Insufficiency)'1               | 0.0000    |
| ## 'Please specify: (choice=Cirrhosis)'1                                 | 100.0000  |
| ## 'Did the patient receive hemodialysis during this admission?'1        | -100.0000 |
| ## 'Was plasma given to the patient during this admission?'1             | -Inf      |
| ## 'Was the patient placed in a prone position during their admission?'1 | 10.0000   |
| ## 'Age at Admission'                                                    | 8.6294    |
| ## Per_Capita                                                            | -63.2428  |
| ## 'SIRS RR'                                                             | 33.3333   |
| ## SIRS_WBC                                                              | 20.0000   |
| ## SIRS...110                                                            | 33.3333   |
| ## 'Creatinine (if 0 = N/A)'                                             | 37.3418   |
| ## Ferritin                                                              | 0.9382    |
| ## CRP                                                                   | 29.1046   |
| ## 'D-Domer'                                                             | -36.2383  |
| ## 'Admission Date:'                                                     | 29.8094   |
| ## 'Please specify: (choice=Diabetes)'1                                  | 100.0000  |
| ## 'SIRS TEMP'                                                           | 0.0000    |
| ## 'Please specify: (choice=Chronic- Hepatitis C)'1                      | 100.0000  |
| ##                                                                       | eQQ Max   |
| ## distance                                                              | 15.5447   |
| ## 'Insurance Class'COMM                                                 | 0.0000    |
| ## 'Insurance Class'MEDICAID                                             | 0.0000    |
| ## 'Insurance Class'MEDICARE                                             | 0.0000    |
| ## 'Insurance Class'OTHER                                                | 0.0000    |
| ## 'Insurance Class'SP                                                   | 0.0000    |
| ## 'Race:'American Indian/Alaskan Native                                 | 100.0000  |
| ## 'Race:'Asian                                                          | 0.0000    |
| ## 'Race:'Black                                                          | 0.0000    |
| ## 'Race:'Native Hawaiian/Pacific Isle                                   | 0.0000    |
| ## 'Race:'Other                                                          | 100.0000  |
| ## 'Race:'Unknown                                                        | 0.0000    |
| ## 'Does the patient have a history of cancer?'1                         | 0.0000    |
| ## 'Please specify: (choice=Hypertension)'1                              | -Inf      |
| ## 'Please specify: (choice=Coronary Artery Disease)'1                   | 0.0000    |
| ## 'Please specify: (choice=Congestive Heart Failure)'1                  | 0.0000    |
| ## 'Please specify: (choice=Asthma)'1                                    | 100.0000  |
| ## 'Please specify: (choice=Chronic Obstructive Pulmonary Disease)'1     | 100.0000  |
| ## 'Please specify: (choice=Chronic Renal Insufficiency)'1               | 0.0000    |
| ## 'Please specify: (choice=Cirrhosis)'1                                 | 100.0000  |
| ## 'Did the patient receive hemodialysis during this admission?'1        | 0.0000    |
| ## 'Was plasma given to the patient during this admission?'1             | -Inf      |
| ## 'Was the patient placed in a prone position during their admission?'1 | 0.0000    |
| ## 'Age at Admission'                                                    | -6.6667   |
| ## Per_Capita                                                            | 0.0000    |
| ## 'SIRS RR'                                                             | 0.0000    |
| ## SIRS_WBC                                                              | 0.0000    |
| ## SIRS...110                                                            | 0.0000    |
| ## 'Creatinine (if 0 = N/A)'                                             | 11.1111   |
| ## Ferritin                                                              | 0.0000    |
| ## CRP                                                                   | 1.0537    |
| ## 'D-Domer'                                                             | -156.6980 |
| ## 'Admission Date:'                                                     | 20.6897   |

```

## 'Please specify: (choice=Diabetes)'1 100.0000
## 'SIRS TEMP' 0.0000
## 'Please specify: (choice=Chronic- Hepatitis C)'1 100.0000
##
## Sample sizes:
## Control Treated
## All 67 47
## Matched 47 47
## Unmatched 20 0
## Discarded 0 0

```

```

matched.cohort.hcq.sirs.1 = get_matches(my.hcq.match.sirs.1, hcq.select.na.sirs.1.na, id_cols = NULL, n
# is there any differene between the groups
binary.variables.hcq.sirs.1 = matched.cohort.hcq.sirs.1 %>%
  dplyr::select(Was.plasma.given.to.the.patient.during.this.admission., Does.the.patient.have.a.history
chi.p.exit.hcq.sirs.1 = vector()
chi.variable.name.hcq.sirs.1 = vector()

for ( i in c(1:5, 7, 8, 10:11, 13,14,15)) { # cirrhosis hep c nitric oxide, asthma
  variable.1 = binary.variables.hcq.sirs.1[[i]][binary.variables.hcq.sirs.1$COVID..Was.hydroxychloroquin
  variable.0 = binary.variables.hcq.sirs.1[[i]][binary.variables.hcq.sirs.1$COVID..Was.hydroxychloroquin
  chisquare.test = chisq.test(variable.1, variable.0)
  chisquare.test.p.value = chisquare.test$p.value
  chi.p.exit.hcq.sirs.1[i] = chisquare.test.p.value
  chi.variable.name.hcq.sirs.1[i] = colnames(binary.variables.hcq.sirs.1)[i]
}

```

```

## Warning in chisq.test(variable.1, variable.0): Chi-squared approximation may be
## incorrect

```

```

## Warning in chisq.test(variable.1, variable.0): Chi-squared approximation may be
## incorrect

```

```

## Warning in chisq.test(variable.1, variable.0): Chi-squared approximation may be
## incorrect

```

```

## Warning in chisq.test(variable.1, variable.0): Chi-squared approximation may be
## incorrect

```

```

## Warning in chisq.test(variable.1, variable.0): Chi-squared approximation may be
## incorrect

```

```

## Warning in chisq.test(variable.1, variable.0): Chi-squared approximation may be
## incorrect

```

```

## Warning in chisq.test(variable.1, variable.0): Chi-squared approximation may be
## incorrect

```

```

## Warning in chisq.test(variable.1, variable.0): Chi-squared approximation may be
## incorrect

```

```

## Warning in chisq.test(variable.1, variable.0): Chi-squared approximation may be

```

```

## incorrect

## Warning in chisq.test(variable.1, variable.0): Chi-squared approximation may be
## incorrect

chi.df.hcq.1 = data.frame(chi.variable.name.hcq.sirs.1, chi.p.exit.hcq.sirs.1) # sig diff: insurance
numerical.variables.hcq.sirs.1 = matched.cohort.hcq.sirs.1 %>%
  dplyr::select(COVID..Was.hydroxychloroquine..Plaquenil..given.during.the.patient.s.admission., Age.at
p.value.exit.hcq.sirs.1 = vector()
variable.name.exit.hcq.sirs.1 = vector()

for ( i in c(2:10,12) ) { # hcq 1 # skip date
  variable.1 = numerical.variables.hcq.sirs.1[[i]] [numerical.variables.hcq.sirs.1$COVID..Was.hydroxychl
  variable.0 = numerical.variables.hcq.sirs.1[[i]] [numerical.variables.hcq.sirs.1$COVID..Was.hydroxychl
  middle.t.test = t.test(variable.1, variable.0)
  t.test.p.value = middle.t.test$p.value
  p.value.exit.hcq.sirs.1[i] = t.test.p.value
  variable.name.exit.hcq.sirs.1[i] = colnames(numerical.variables.hcq)[i]
}

t.test.df.hcq = data.frame(variable.name.exit.hcq.sirs.1, p.value.exit.hcq.sirs.1) # Sig different: age

## only significant different one in matching is length of stay
match.hcq.glm.sirs.1 = glm(death ~ COVID..Was.hydroxychloroquine..Plaquenil..given.during.the.patient.s
match.hcq.summary.sirs.1 = summary(match.hcq.glm.sirs.1) #0.00426
match.hcq.conf.intervals.sirs.1 = exp(cbind(coef(match.hcq.glm.sirs.1), confint(match.hcq.glm.sirs.1)))

## Waiting for profiling to be done...

## sirs less than 2 with larger sample size and no labs
row.names(hcq.select.no.labs.na.sirs.1) <- 1:nrow(hcq.select.no.labs.na.sirs.1)

my.full.match.hcq.sirs.1.no.labs = matchit('COVID- Was hydroxychloroquine (Plaquenil) given during the p

## Warning: glm.fit: fitted probabilities numerically 0 or 1 occurred

summary(my.full.match.hcq.sirs.1.no.labs)

##
## Call:
## matchit(formula = 'COVID- Was hydroxychloroquine (Plaquenil) given during the patient's admission?' +
##   'Insurance Class' + 'Race:' + 'Does the patient have a history of cancer?' +
##   'Please specify: (choice=Hypertension)' + 'Please specify: (choice=Coronary Artery Disease)' +
##   'Please specify: (choice=Congestive Heart Failure)' +
##   'Please specify: (choice=Asthma)' + 'Please specify: (choice=Chronic Obstructive Pulmonary D
##   'Please specify: (choice=Chronic Renal Insufficiency)' +
##   'Please specify: (choice=Cirrhosis)' + 'Did the patient receive hemodialysis during this adm
##   'Was plasma given to the patient during this admission?' +
##   'Was the patient placed in a prone position during their admission?' +
##   'Was plasma given to the patient during this admission?' +

```



```

##      'Age at Admission' + Per_Capita + 'SIRS RR' + SIRS_WBC +
##      SIRS...110 + 'Creatinine (if 0 = N/A)' + 'Admission Date:' +
##      'Please specify: (choice=Diabetes)' + 'SIRS TEMP' + 'Please specify: (choice=Chronic- Hepati
##      data = hcq.select.no.labs.na.sirs.1, method = "nearest")
##
## Summary of balance for all data:
##
##                                     Means Treated
## distance                                     0.5131
## 'Insurance Class'COMM                                     0.2586
## 'Insurance Class'MEDICAID                               0.1983
## 'Insurance Class'MEDICARE                               0.5259
## 'Insurance Class'OTHER                                   0.0000
## 'Insurance Class'SP                                     0.0172
## 'Race:'American Indian/Alaskan Native                   0.0086
## 'Race:'Asian                                             0.0172
## 'Race:'Black                                             0.1810
## 'Race:'Native Hawaiian/Pacific Isle                     0.0000
## 'Race:'Other                                             0.0776
## 'Race:'Unknown                                           0.0948
## 'Does the patient have a history of cancer?'1           0.1638
## 'Please specify: (choice=Hypertension)'1                 0.5431
## 'Please specify: (choice=Coronary Artery Disease)'1      0.1552
## 'Please specify: (choice=Congestive Heart Failure)'1     0.0345
## 'Please specify: (choice=Asthma)'1                       0.0345
## 'Please specify: (choice=Chronic Obstructive Pulmonary Disease)'1 0.0603
## 'Please specify: (choice=Chronic Renal Insufficiency)'1 0.1034
## 'Please specify: (choice=Cirrhosis)'1                   0.0000
## 'Did the patient receive hemodialysis during this admission?'1 0.0776
## 'Was plasma given to the patient during this admission?'1 0.0948
## 'Was the patient placed in a prone position during their admission?'1 0.2586
## 'Age at Admission'                                     68.3534
## Per_Capita                                             51788.6724
## 'SIRS RR'                                              0.5603
## SIRS_WBC                                               0.1810
## SIRS...110                                             0.8190
## 'Creatinine (if 0 = N/A)'                               1.1612
## 'Admission Date:'                                     18356.0086
## 'Please specify: (choice=Diabetes)'1                   0.3017
## 'SIRS TEMP'                                            0.0431
## 'Please specify: (choice=Chronic- Hepatitis C)'1        0.0000
##
##                                     Means Control
## distance                                     0.2024
## 'Insurance Class'COMM                                     0.2079
## 'Insurance Class'MEDICAID                               0.1505
## 'Insurance Class'MEDICARE                               0.6380
## 'Insurance Class'OTHER                                   0.0000
## 'Insurance Class'SP                                     0.0036
## 'Race:'American Indian/Alaskan Native                   0.0036
## 'Race:'Asian                                             0.0143
## 'Race:'Black                                             0.1935
## 'Race:'Native Hawaiian/Pacific Isle                     0.0000
## 'Race:'Other                                             0.0430
## 'Race:'Unknown                                           0.1470
## 'Does the patient have a history of cancer?'1           0.1470

```

|                                                                          |            |
|--------------------------------------------------------------------------|------------|
| ## 'Please specify: (choice=Hypertension)'1                              | 0.6272     |
| ## 'Please specify: (choice=Coronary Artery Disease)'1                   | 0.1756     |
| ## 'Please specify: (choice=Congestive Heart Failure)'1                  | 0.0896     |
| ## 'Please specify: (choice=Asthma)'1                                    | 0.0430     |
| ## 'Please specify: (choice=Chronic Obstructive Pulmonary Disease)'1     | 0.0824     |
| ## 'Please specify: (choice=Chronic Renal Insufficiency)'1               | 0.1004     |
| ## 'Please specify: (choice=Cirrhosis)'1                                 | 0.0215     |
| ## 'Did the patient receive hemodialysis during this admission?'1        | 0.0645     |
| ## 'Was plasma given to the patient during this admission?'1             | 0.0573     |
| ## 'Was the patient placed in a prone position during their admission?'1 | 0.0430     |
| ## 'Age at Admission'                                                    | 70.7885    |
| ## Per_Capita                                                            | 52164.3262 |
| ## 'SIRS RR'                                                             | 0.3584     |
| ## SIRS_WBC                                                              | 0.2043     |
| ## SIRS...110                                                            | 0.7133     |
| ## 'Creatinine (if 0 = N/A)'                                             | 1.5731     |
| ## 'Admission Date:'                                                     | 18366.9606 |
| ## 'Please specify: (choice=Diabetes)'1                                  | 0.2903     |
| ## 'SIRS TEMP'                                                           | 0.0430     |
| ## 'Please specify: (choice=Chronic- Hepatitis C)'1                      | 0.0143     |
| ##                                                                       | SD Control |
| ## distance                                                              | 0.1842     |
| ## 'Insurance Class'COMM                                                 | 0.4065     |
| ## 'Insurance Class'MEDICAID                                             | 0.3582     |
| ## 'Insurance Class'MEDICARE                                             | 0.4814     |
| ## 'Insurance Class'OTHER                                                | 0.0000     |
| ## 'Insurance Class'SP                                                   | 0.0599     |
| ## 'Race:'American Indian/Alaskan Native                                 | 0.0599     |
| ## 'Race:'Asian                                                          | 0.1191     |
| ## 'Race:'Black                                                          | 0.3958     |
| ## 'Race:'Native Hawaiian/Pacific Isle                                   | 0.0000     |
| ## 'Race:'Other                                                          | 0.2032     |
| ## 'Race:'Unknown                                                        | 0.3547     |
| ## 'Does the patient have a history of cancer?'1                         | 0.3547     |
| ## 'Please specify: (choice=Hypertension)'1                              | 0.4844     |
| ## 'Please specify: (choice=Coronary Artery Disease)'1                   | 0.3812     |
| ## 'Please specify: (choice=Congestive Heart Failure)'1                  | 0.2861     |
| ## 'Please specify: (choice=Asthma)'1                                    | 0.2032     |
| ## 'Please specify: (choice=Chronic Obstructive Pulmonary Disease)'1     | 0.2755     |
| ## 'Please specify: (choice=Chronic Renal Insufficiency)'1               | 0.3010     |
| ## 'Please specify: (choice=Cirrhosis)'1                                 | 0.1453     |
| ## 'Did the patient receive hemodialysis during this admission?'1        | 0.2461     |
| ## 'Was plasma given to the patient during this admission?'1             | 0.2329     |
| ## 'Was the patient placed in a prone position during their admission?'1 | 0.2032     |
| ## 'Age at Admission'                                                    | 18.0356    |
| ## Per_Capita                                                            | 28507.4544 |
| ## 'SIRS RR'                                                             | 0.4804     |
| ## SIRS_WBC                                                              | 0.4039     |
| ## SIRS...110                                                            | 0.4531     |
| ## 'Creatinine (if 0 = N/A)'                                             | 2.0882     |
| ## 'Admission Date:'                                                     | 18.1045    |
| ## 'Please specify: (choice=Diabetes)'1                                  | 0.4547     |
| ## 'SIRS TEMP'                                                           | 0.2032     |
| ## 'Please specify: (choice=Chronic- Hepatitis C)'1                      | 0.1191     |

|                                                                          | Mean Diff |
|--------------------------------------------------------------------------|-----------|
| ##                                                                       |           |
| ## distance                                                              | 0.3106    |
| ## 'Insurance Class'COMM                                                 | 0.0507    |
| ## 'Insurance Class'MEDICAID                                             | 0.0477    |
| ## 'Insurance Class'MEDICARE                                             | -0.1121   |
| ## 'Insurance Class'OTHER                                                | 0.0000    |
| ## 'Insurance Class'SP                                                   | 0.0137    |
| ## 'Race:'American Indian/Alaskan Native                                 | 0.0050    |
| ## 'Race:'Asian                                                          | 0.0029    |
| ## 'Race:'Black                                                          | -0.0125   |
| ## 'Race:'Native Hawaiian/Pacific Isle                                   | 0.0000    |
| ## 'Race:'Other                                                          | 0.0346    |
| ## 'Race:'Unknown                                                        | -0.0521   |
| ## 'Does the patient have a history of cancer?'1                         | 0.0168    |
| ## 'Please specify: (choice=Hypertension)'1                              | -0.0841   |
| ## 'Please specify: (choice=Coronary Artery Disease)'1                   | -0.0205   |
| ## 'Please specify: (choice=Congestive Heart Failure)'1                  | -0.0551   |
| ## 'Please specify: (choice=Asthma)'1                                    | -0.0085   |
| ## 'Please specify: (choice=Chronic Obstructive Pulmonary Disease)'1     | -0.0221   |
| ## 'Please specify: (choice=Chronic Renal Insufficiency)'1               | 0.0031    |
| ## 'Please specify: (choice=Cirrhosis)'1                                 | -0.0215   |
| ## 'Did the patient receive hemodialysis during this admission?'1        | 0.0131    |
| ## 'Was plasma given to the patient during this admission?'1             | 0.0375    |
| ## 'Was the patient placed in a prone position during their admission?'1 | 0.2156    |
| ## 'Age at Admission'                                                    | -2.4351   |
| ## Per_Capita                                                            | -375.6538 |
| ## 'SIRS RR'                                                             | 0.2019    |
| ## SIRS_WBC                                                              | -0.0233   |
| ## SIRS...110                                                            | 0.1057    |
| ## 'Creatinine (if 0 = N/A)'                                             | -0.4119   |
| ## 'Admission Date:'                                                     | -10.9520  |
| ## 'Please specify: (choice=Diabetes)'1                                  | 0.0114    |
| ## 'SIRS TEMP'                                                           | 0.0001    |
| ## 'Please specify: (choice=Chronic- Hepatitis C)'1                      | -0.0143   |
| ##                                                                       | eQQ Med   |
| ## distance                                                              | 0.3473    |
| ## 'Insurance Class'COMM                                                 | 0.0000    |
| ## 'Insurance Class'MEDICAID                                             | 0.0000    |
| ## 'Insurance Class'MEDICARE                                             | 0.0000    |
| ## 'Insurance Class'OTHER                                                | 0.0000    |
| ## 'Insurance Class'SP                                                   | 0.0000    |
| ## 'Race:'American Indian/Alaskan Native                                 | 0.0000    |
| ## 'Race:'Asian                                                          | 0.0000    |
| ## 'Race:'Black                                                          | 0.0000    |
| ## 'Race:'Native Hawaiian/Pacific Isle                                   | 0.0000    |
| ## 'Race:'Other                                                          | 0.0000    |
| ## 'Race:'Unknown                                                        | 0.0000    |
| ## 'Does the patient have a history of cancer?'1                         | 0.0000    |
| ## 'Please specify: (choice=Hypertension)'1                              | 0.0000    |
| ## 'Please specify: (choice=Coronary Artery Disease)'1                   | 0.0000    |
| ## 'Please specify: (choice=Congestive Heart Failure)'1                  | 0.0000    |
| ## 'Please specify: (choice=Asthma)'1                                    | 0.0000    |
| ## 'Please specify: (choice=Chronic Obstructive Pulmonary Disease)'1     | 0.0000    |
| ## 'Please specify: (choice=Chronic Renal Insufficiency)'1               | 0.0000    |

|                                                                          |           |
|--------------------------------------------------------------------------|-----------|
| ## 'Please specify: (choice=Cirrhosis)'1                                 | 0.0000    |
| ## 'Did the patient receive hemodialysis during this admission?'1        | 0.0000    |
| ## 'Was plasma given to the patient during this admission?'1             | 0.0000    |
| ## 'Was the patient placed in a prone position during their admission?'1 | 0.0000    |
| ## 'Age at Admission'                                                    | 4.0000    |
| ## Per_Capita                                                            | 1858.0000 |
| ## 'SIRS RR'                                                             | 0.0000    |
| ## SIRS_WBC                                                              | 0.0000    |
| ## SIRS...110                                                            | 0.0000    |
| ## 'Creatinine (if 0 = N/A)'                                             | 0.1000    |
| ## 'Admission Date:'                                                     | 8.0000    |
| ## 'Please specify: (choice=Diabetes)'1                                  | 0.0000    |
| ## 'SIRS TEMP'                                                           | 0.0000    |
| ## 'Please specify: (choice=Chronic- Hepatitis C)'1                      | 0.0000    |
| ##                                                                       | eQQ Mean  |
| ## distance                                                              | 0.3102    |
| ## 'Insurance Class'COMM                                                 | 0.0517    |
| ## 'Insurance Class'MEDICAID                                             | 0.0517    |
| ## 'Insurance Class'MEDICARE                                             | 0.1121    |
| ## 'Insurance Class'OTHER                                                | 0.0000    |
| ## 'Insurance Class'SP                                                   | 0.0086    |
| ## 'Race:'American Indian/Alaskan Native                                 | 0.0000    |
| ## 'Race:'Asian                                                          | 0.0000    |
| ## 'Race:'Black                                                          | 0.0086    |
| ## 'Race:'Native Hawaiian/Pacific Isle                                   | 0.0000    |
| ## 'Race:'Other                                                          | 0.0345    |
| ## 'Race:'Unknown                                                        | 0.0517    |
| ## 'Does the patient have a history of cancer?'1                         | 0.0172    |
| ## 'Please specify: (choice=Hypertension)'1                              | 0.0776    |
| ## 'Please specify: (choice=Coronary Artery Disease)'1                   | 0.0172    |
| ## 'Please specify: (choice=Congestive Heart Failure)'1                  | 0.0517    |
| ## 'Please specify: (choice=Asthma)'1                                    | 0.0086    |
| ## 'Please specify: (choice=Chronic Obstructive Pulmonary Disease)'1     | 0.0259    |
| ## 'Please specify: (choice=Chronic Renal Insufficiency)'1               | 0.0000    |
| ## 'Please specify: (choice=Cirrhosis)'1                                 | 0.0259    |
| ## 'Did the patient receive hemodialysis during this admission?'1        | 0.0086    |
| ## 'Was plasma given to the patient during this admission?'1             | 0.0345    |
| ## 'Was the patient placed in a prone position during their admission?'1 | 0.2155    |
| ## 'Age at Admission'                                                    | 4.0603    |
| ## Per_Capita                                                            | 6463.0517 |
| ## 'SIRS RR'                                                             | 0.2069    |
| ## SIRS_WBC                                                              | 0.0259    |
| ## SIRS...110                                                            | 0.1121    |
| ## 'Creatinine (if 0 = N/A)'                                             | 0.4690    |
| ## 'Admission Date:'                                                     | 10.8707   |
| ## 'Please specify: (choice=Diabetes)'1                                  | 0.0086    |
| ## 'SIRS TEMP'                                                           | 0.0000    |
| ## 'Please specify: (choice=Chronic- Hepatitis C)'1                      | 0.0172    |
| ##                                                                       | eQQ Max   |
| ## distance                                                              | 0.4424    |
| ## 'Insurance Class'COMM                                                 | 1.0000    |
| ## 'Insurance Class'MEDICAID                                             | 1.0000    |
| ## 'Insurance Class'MEDICARE                                             | 1.0000    |
| ## 'Insurance Class'OTHER                                                | 0.0000    |

|                                                                          |               |
|--------------------------------------------------------------------------|---------------|
| ## 'Insurance Class'SP                                                   | 1.0000        |
| ## 'Race:'American Indian/Alaskan Native                                 | 0.0000        |
| ## 'Race:'Asian                                                          | 0.0000        |
| ## 'Race:'Black                                                          | 1.0000        |
| ## 'Race:'Native Hawaiian/Pacific Isle                                   | 0.0000        |
| ## 'Race:'Other                                                          | 1.0000        |
| ## 'Race:'Unknown                                                        | 1.0000        |
| ## 'Does the patient have a history of cancer?'1                         | 1.0000        |
| ## 'Please specify: (choice=Hypertension)'1                              | 1.0000        |
| ## 'Please specify: (choice=Coronary Artery Disease)'1                   | 1.0000        |
| ## 'Please specify: (choice=Congestive Heart Failure)'1                  | 1.0000        |
| ## 'Please specify: (choice=Asthma)'1                                    | 1.0000        |
| ## 'Please specify: (choice=Chronic Obstructive Pulmonary Disease)'1     | 1.0000        |
| ## 'Please specify: (choice=Chronic Renal Insufficiency)'1               | 0.0000        |
| ## 'Please specify: (choice=Cirrhosis)'1                                 | 1.0000        |
| ## 'Did the patient receive hemodialysis during this admission?'1        | 1.0000        |
| ## 'Was plasma given to the patient during this admission?'1             | 1.0000        |
| ## 'Was the patient placed in a prone position during their admission?'1 | 1.0000        |
| ## 'Age at Admission'                                                    | 9.0000        |
| ## Per_Capita                                                            | 263789.0000   |
| ## 'SIRS RR'                                                             | 1.0000        |
| ## SIRS_WBC                                                              | 1.0000        |
| ## SIRS...110                                                            | 1.0000        |
| ## 'Creatinine (if 0 = N/A)'                                             | 11.8000       |
| ## 'Admission Date:'                                                     | 37.0000       |
| ## 'Please specify: (choice=Diabetes)'1                                  | 1.0000        |
| ## 'SIRS TEMP'                                                           | 0.0000        |
| ## 'Please specify: (choice=Chronic- Hepatitis C)'1                      | 1.0000        |
| ##                                                                       |               |
| ##                                                                       |               |
| ## Summary of balance for matched data:                                  |               |
| ##                                                                       | Means Treated |
| ## distance                                                              | 0.5131        |
| ## 'Insurance Class'COMM                                                 | 0.2586        |
| ## 'Insurance Class'MEDICAID                                             | 0.1983        |
| ## 'Insurance Class'MEDICARE                                             | 0.5259        |
| ## 'Insurance Class'OTHER                                                | 0.0000        |
| ## 'Insurance Class'SP                                                   | 0.0172        |
| ## 'Race:'American Indian/Alaskan Native                                 | 0.0086        |
| ## 'Race:'Asian                                                          | 0.0172        |
| ## 'Race:'Black                                                          | 0.1810        |
| ## 'Race:'Native Hawaiian/Pacific Isle                                   | 0.0000        |
| ## 'Race:'Other                                                          | 0.0776        |
| ## 'Race:'Unknown                                                        | 0.0948        |
| ## 'Does the patient have a history of cancer?'1                         | 0.1638        |
| ## 'Please specify: (choice=Hypertension)'1                              | 0.5431        |
| ## 'Please specify: (choice=Coronary Artery Disease)'1                   | 0.1552        |
| ## 'Please specify: (choice=Congestive Heart Failure)'1                  | 0.0345        |
| ## 'Please specify: (choice=Asthma)'1                                    | 0.0345        |
| ## 'Please specify: (choice=Chronic Obstructive Pulmonary Disease)'1     | 0.0603        |
| ## 'Please specify: (choice=Chronic Renal Insufficiency)'1               | 0.1034        |
| ## 'Please specify: (choice=Cirrhosis)'1                                 | 0.0000        |
| ## 'Did the patient receive hemodialysis during this admission?'1        | 0.0776        |
| ## 'Was plasma given to the patient during this admission?'1             | 0.0948        |

|                                                                         |   |               |
|-------------------------------------------------------------------------|---|---------------|
| ## 'Was the patient placed in a prone position during their admission?' | 1 | 0.2586        |
| ## 'Age at Admission'                                                   |   | 68.3534       |
| ## Per_Capita                                                           |   | 51788.6724    |
| ## 'SIRS RR'                                                            |   | 0.5603        |
| ## SIRS_WBC                                                             |   | 0.1810        |
| ## SIRS...110                                                           |   | 0.8190        |
| ## 'Creatinine (if 0 = N/A)'                                            |   | 1.1612        |
| ## 'Admission Date:'                                                    |   | 18356.0086    |
| ## 'Please specify: (choice=Diabetes)'                                  | 1 | 0.3017        |
| ## 'SIRS TEMP'                                                          |   | 0.0431        |
| ## 'Please specify: (choice=Chronic- Hepatitis C)'                      | 1 | 0.0000        |
| ##                                                                      |   | Means Control |
| ## distance                                                             |   | 0.3707        |
| ## 'Insurance Class'COMM                                                |   | 0.2500        |
| ## 'Insurance Class'MEDICAID                                            |   | 0.1724        |
| ## 'Insurance Class'MEDICARE                                            |   | 0.5776        |
| ## 'Insurance Class'OTHER                                               |   | 0.0000        |
| ## 'Insurance Class'SP                                                  |   | 0.0000        |
| ## 'Race:'American Indian/Alaskan Native                                |   | 0.0000        |
| ## 'Race:'Asian                                                         |   | 0.0172        |
| ## 'Race:'Black                                                         |   | 0.1724        |
| ## 'Race:'Native Hawaiian/Pacific Isle                                  |   | 0.0000        |
| ## 'Race:'Other                                                         |   | 0.0517        |
| ## 'Race:'Unknown                                                       |   | 0.0603        |
| ## 'Does the patient have a history of cancer?'                         | 1 | 0.1466        |
| ## 'Please specify: (choice=Hypertension)'                              | 1 | 0.6034        |
| ## 'Please specify: (choice=Coronary Artery Disease)'                   | 1 | 0.1724        |
| ## 'Please specify: (choice=Congestive Heart Failure)'                  | 1 | 0.0259        |
| ## 'Please specify: (choice=Asthma)'                                    | 1 | 0.0259        |
| ## 'Please specify: (choice=Chronic Obstructive Pulmonary Disease)'     | 1 | 0.0862        |
| ## 'Please specify: (choice=Chronic Renal Insufficiency)'               | 1 | 0.1034        |
| ## 'Please specify: (choice=Cirrhosis)'                                 | 1 | 0.0000        |
| ## 'Did the patient receive hemodialysis during this admission?'        | 1 | 0.0603        |
| ## 'Was plasma given to the patient during this admission?'             | 1 | 0.0948        |
| ## 'Was the patient placed in a prone position during their admission?' | 1 | 0.0862        |
| ## 'Age at Admission'                                                   |   | 69.9914       |
| ## Per_Capita                                                           |   | 51060.0948    |
| ## 'SIRS RR'                                                            |   | 0.5000        |
| ## SIRS_WBC                                                             |   | 0.2241        |
| ## SIRS...110                                                           |   | 0.7931        |
| ## 'Creatinine (if 0 = N/A)'                                            |   | 1.2664        |
| ## 'Admission Date:'                                                    |   | 18357.3362    |
| ## 'Please specify: (choice=Diabetes)'                                  | 1 | 0.3103        |
| ## 'SIRS TEMP'                                                          |   | 0.0690        |
| ## 'Please specify: (choice=Chronic- Hepatitis C)'                      | 1 | 0.0000        |
| ##                                                                      |   | SD Control    |
| ## distance                                                             |   | 0.1600        |
| ## 'Insurance Class'COMM                                                |   | 0.4349        |
| ## 'Insurance Class'MEDICAID                                            |   | 0.3794        |
| ## 'Insurance Class'MEDICARE                                            |   | 0.4961        |
| ## 'Insurance Class'OTHER                                               |   | 0.0000        |
| ## 'Insurance Class'SP                                                  |   | 0.0000        |
| ## 'Race:'American Indian/Alaskan Native                                |   | 0.0000        |
| ## 'Race:'Asian                                                         |   | 0.1307        |

|                                                                          |            |
|--------------------------------------------------------------------------|------------|
| ## 'Race:'Black                                                          | 0.3794     |
| ## 'Race:'Native Hawaiian/Pacific Isle                                   | 0.0000     |
| ## 'Race:'Other                                                          | 0.2224     |
| ## 'Race:'Unknown                                                        | 0.2392     |
| ## 'Does the patient have a history of cancer?'1                         | 0.3552     |
| ## 'Please specify: (choice=Hypertension)'1                              | 0.4913     |
| ## 'Please specify: (choice=Coronary Artery Disease)'1                   | 0.3794     |
| ## 'Please specify: (choice=Congestive Heart Failure)'1                  | 0.1594     |
| ## 'Please specify: (choice=Asthma)'1                                    | 0.1594     |
| ## 'Please specify: (choice=Chronic Obstructive Pulmonary Disease)'1     | 0.2819     |
| ## 'Please specify: (choice=Chronic Renal Insufficiency)'1               | 0.3059     |
| ## 'Please specify: (choice=Cirrhosis)'1                                 | 0.0000     |
| ## 'Did the patient receive hemodialysis during this admission?'1        | 0.2392     |
| ## 'Was plasma given to the patient during this admission?'1             | 0.2942     |
| ## 'Was the patient placed in a prone position during their admission?'1 | 0.2819     |
| ## 'Age at Admission'                                                    | 18.2664    |
| ## Per_Capita                                                            | 22421.4400 |
| ## 'SIRS RR'                                                             | 0.5022     |
| ## SIRS_WBC                                                              | 0.4188     |
| ## SIRS...110                                                            | 0.4068     |
| ## 'Creatinine (if 0 = N/A)'                                             | 1.0803     |
| ## 'Admission Date:'                                                     | 13.6394    |
| ## 'Please specify: (choice=Diabetes)'1                                  | 0.4646     |
| ## 'SIRS TEMP'                                                           | 0.2545     |
| ## 'Please specify: (choice=Chronic- Hepatitis C)'1                      | 0.0000     |
| ##                                                                       | Mean Diff  |
| ## distance                                                              | 0.1424     |
| ## 'Insurance Class'COMM                                                 | 0.0086     |
| ## 'Insurance Class'MEDICAID                                             | 0.0259     |
| ## 'Insurance Class'MEDICARE                                             | -0.0517    |
| ## 'Insurance Class'OTHER                                                | 0.0000     |
| ## 'Insurance Class'SP                                                   | 0.0172     |
| ## 'Race:'American Indian/Alaskan Native                                 | 0.0086     |
| ## 'Race:'Asian                                                          | 0.0000     |
| ## 'Race:'Black                                                          | 0.0086     |
| ## 'Race:'Native Hawaiian/Pacific Isle                                   | 0.0000     |
| ## 'Race:'Other                                                          | 0.0259     |
| ## 'Race:'Unknown                                                        | 0.0345     |
| ## 'Does the patient have a history of cancer?'1                         | 0.0172     |
| ## 'Please specify: (choice=Hypertension)'1                              | -0.0603    |
| ## 'Please specify: (choice=Coronary Artery Disease)'1                   | -0.0172    |
| ## 'Please specify: (choice=Congestive Heart Failure)'1                  | 0.0086     |
| ## 'Please specify: (choice=Asthma)'1                                    | 0.0086     |
| ## 'Please specify: (choice=Chronic Obstructive Pulmonary Disease)'1     | -0.0259    |
| ## 'Please specify: (choice=Chronic Renal Insufficiency)'1               | 0.0000     |
| ## 'Please specify: (choice=Cirrhosis)'1                                 | 0.0000     |
| ## 'Did the patient receive hemodialysis during this admission?'1        | 0.0172     |
| ## 'Was plasma given to the patient during this admission?'1             | 0.0000     |
| ## 'Was the patient placed in a prone position during their admission?'1 | 0.1724     |
| ## 'Age at Admission'                                                    | -1.6379    |
| ## Per_Capita                                                            | 728.5776   |
| ## 'SIRS RR'                                                             | 0.0603     |
| ## SIRS_WBC                                                              | -0.0431    |
| ## SIRS...110                                                            | 0.0259     |

|                                                                          |           |
|--------------------------------------------------------------------------|-----------|
| ## 'Creatinine (if 0 = N/A)'                                             | -0.1052   |
| ## 'Admission Date:'                                                     | -1.3276   |
| ## 'Please specify: (choice=Diabetes)'1                                  | -0.0086   |
| ## 'SIRS TEMP'                                                           | -0.0259   |
| ## 'Please specify: (choice=Chronic- Hepatitis C)'1                      | 0.0000    |
| ##                                                                       | eQQ Med   |
| ## distance                                                              | 0.1365    |
| ## 'Insurance Class'COMM                                                 | 0.0000    |
| ## 'Insurance Class'MEDICAID                                             | 0.0000    |
| ## 'Insurance Class'MEDICARE                                             | 0.0000    |
| ## 'Insurance Class'OTHER                                                | 0.0000    |
| ## 'Insurance Class'SP                                                   | 0.0000    |
| ## 'Race:'American Indian/Alaskan Native                                 | 0.0000    |
| ## 'Race:'Asian                                                          | 0.0000    |
| ## 'Race:'Black                                                          | 0.0000    |
| ## 'Race:'Native Hawaiian/Pacific Isle                                   | 0.0000    |
| ## 'Race:'Other                                                          | 0.0000    |
| ## 'Race:'Unknown                                                        | 0.0000    |
| ## 'Does the patient have a history of cancer?'1                         | 0.0000    |
| ## 'Please specify: (choice=Hypertension)'1                              | 0.0000    |
| ## 'Please specify: (choice=Coronary Artery Disease)'1                   | 0.0000    |
| ## 'Please specify: (choice=Congestive Heart Failure)'1                  | 0.0000    |
| ## 'Please specify: (choice=Asthma)'1                                    | 0.0000    |
| ## 'Please specify: (choice=Chronic Obstructive Pulmonary Disease)'1     | 0.0000    |
| ## 'Please specify: (choice=Chronic Renal Insufficiency)'1               | 0.0000    |
| ## 'Please specify: (choice=Cirrhosis)'1                                 | 0.0000    |
| ## 'Did the patient receive hemodialysis during this admission?'1        | 0.0000    |
| ## 'Was plasma given to the patient during this admission?'1             | 0.0000    |
| ## 'Was the patient placed in a prone position during their admission?'1 | 0.0000    |
| ## 'Age at Admission'                                                    | 4.0000    |
| ## Per_Capita                                                            | 1858.0000 |
| ## 'SIRS RR'                                                             | 0.0000    |
| ## SIRS_WBC                                                              | 0.0000    |
| ## SIRS...110                                                            | 0.0000    |
| ## 'Creatinine (if 0 = N/A)'                                             | 0.1000    |
| ## 'Admission Date:'                                                     | 3.0000    |
| ## 'Please specify: (choice=Diabetes)'1                                  | 0.0000    |
| ## 'SIRS TEMP'                                                           | 0.0000    |
| ## 'Please specify: (choice=Chronic- Hepatitis C)'1                      | 0.0000    |
| ##                                                                       | eQQ Mean  |
| ## distance                                                              | 0.1426    |
| ## 'Insurance Class'COMM                                                 | 0.0086    |
| ## 'Insurance Class'MEDICAID                                             | 0.0259    |
| ## 'Insurance Class'MEDICARE                                             | 0.0517    |
| ## 'Insurance Class'OTHER                                                | 0.0000    |
| ## 'Insurance Class'SP                                                   | 0.0172    |
| ## 'Race:'American Indian/Alaskan Native                                 | 0.0086    |
| ## 'Race:'Asian                                                          | 0.0000    |
| ## 'Race:'Black                                                          | 0.0086    |
| ## 'Race:'Native Hawaiian/Pacific Isle                                   | 0.0000    |
| ## 'Race:'Other                                                          | 0.0259    |
| ## 'Race:'Unknown                                                        | 0.0345    |
| ## 'Does the patient have a history of cancer?'1                         | 0.0172    |
| ## 'Please specify: (choice=Hypertension)'1                              | 0.0603    |



|                                                                          |           |
|--------------------------------------------------------------------------|-----------|
| ## 'Please specify: (choice=Coronary Artery Disease)'1                   | 0.0172    |
| ## 'Please specify: (choice=Congestive Heart Failure)'1                  | 0.0086    |
| ## 'Please specify: (choice=Asthma)'1                                    | 0.0086    |
| ## 'Please specify: (choice=Chronic Obstructive Pulmonary Disease)'1     | 0.0259    |
| ## 'Please specify: (choice=Chronic Renal Insufficiency)'1               | 0.0000    |
| ## 'Please specify: (choice=Cirrhosis)'1                                 | 0.0000    |
| ## 'Did the patient receive hemodialysis during this admission?'1        | 0.0172    |
| ## 'Was plasma given to the patient during this admission?'1             | 0.0000    |
| ## 'Was the patient placed in a prone position during their admission?'1 | 0.1724    |
| ## 'Age at Admission'                                                    | 3.8103    |
| ## Per_Capita                                                            | 3971.4052 |
| ## 'SIRS RR'                                                             | 0.0603    |
| ## SIRS_WBC                                                              | 0.0431    |
| ## SIRS...110                                                            | 0.0259    |
| ## 'Creatinine (if 0 = N/A)'                                             | 0.1431    |
| ## 'Admission Date:'                                                     | 3.9655    |
| ## 'Please specify: (choice=Diabetes)'1                                  | 0.0086    |
| ## 'SIRS TEMP'                                                           | 0.0259    |
| ## 'Please specify: (choice=Chronic- Hepatitis C)'1                      | 0.0000    |
| ##                                                                       | eQQ Max   |
| ## distance                                                              | 3.301e-01 |
| ## 'Insurance Class'COMM                                                 | 1.000e+00 |
| ## 'Insurance Class'MEDICAID                                             | 1.000e+00 |
| ## 'Insurance Class'MEDICARE                                             | 1.000e+00 |
| ## 'Insurance Class'OTHER                                                | 0.000e+00 |
| ## 'Insurance Class'SP                                                   | 1.000e+00 |
| ## 'Race:'American Indian/Alaskan Native                                 | 1.000e+00 |
| ## 'Race:'Asian                                                          | 0.000e+00 |
| ## 'Race:'Black                                                          | 1.000e+00 |
| ## 'Race:'Native Hawaiian/Pacific Isle                                   | 0.000e+00 |
| ## 'Race:'Other                                                          | 1.000e+00 |
| ## 'Race:'Unknown                                                        | 1.000e+00 |
| ## 'Does the patient have a history of cancer?'1                         | 1.000e+00 |
| ## 'Please specify: (choice=Hypertension)'1                              | 1.000e+00 |
| ## 'Please specify: (choice=Coronary Artery Disease)'1                   | 1.000e+00 |
| ## 'Please specify: (choice=Congestive Heart Failure)'1                  | 1.000e+00 |
| ## 'Please specify: (choice=Asthma)'1                                    | 1.000e+00 |
| ## 'Please specify: (choice=Chronic Obstructive Pulmonary Disease)'1     | 1.000e+00 |
| ## 'Please specify: (choice=Chronic Renal Insufficiency)'1               | 0.000e+00 |
| ## 'Please specify: (choice=Cirrhosis)'1                                 | 0.000e+00 |
| ## 'Did the patient receive hemodialysis during this admission?'1        | 1.000e+00 |
| ## 'Was plasma given to the patient during this admission?'1             | 0.000e+00 |
| ## 'Was the patient placed in a prone position during their admission?'1 | 1.000e+00 |
| ## 'Age at Admission'                                                    | 9.000e+00 |
| ## Per_Capita                                                            | 3.161e+04 |
| ## 'SIRS RR'                                                             | 1.000e+00 |
| ## SIRS_WBC                                                              | 1.000e+00 |
| ## SIRS...110                                                            | 1.000e+00 |
| ## 'Creatinine (if 0 = N/A)'                                             | 1.500e+00 |
| ## 'Admission Date:'                                                     | 1.300e+01 |
| ## 'Please specify: (choice=Diabetes)'1                                  | 1.000e+00 |
| ## 'SIRS TEMP'                                                           | 1.000e+00 |
| ## 'Please specify: (choice=Chronic- Hepatitis C)'1                      | 0.000e+00 |
| ##                                                                       |           |

```

## Percent Balance Improvement:
##
## distance 54.1653
## 'Insurance Class'COMM 83.0085
## 'Insurance Class'MEDICAID 45.8252
## 'Insurance Class'MEDICARE 53.8716
## 'Insurance Class'OTHER 0.0000
## 'Insurance Class'SP -26.2443
## 'Race:'American Indian/Alaskan Native -71.1656
## 'Race:'Asian 100.0000
## 'Race:'Black 31.1111
## 'Race:'Native Hawaiian/Pacific Isle 0.0000
## 'Race:'Other 25.2011
## 'Race:'Unknown 33.8471
## 'Does the patient have a history of cancer?'1 -2.3853
## 'Please specify: (choice=Hypertension)'1 28.2776
## 'Please specify: (choice=Coronary Artery Disease)'1 15.7100
## 'Please specify: (choice=Congestive Heart Failure)'1 84.3610
## 'Please specify: (choice=Asthma)'1 -1.0870
## 'Please specify: (choice=Chronic Obstructive Pulmonary Disease)'1 -17.0629
## 'Please specify: (choice=Chronic Renal Insufficiency)'1 100.0000
## 'Please specify: (choice=Cirrhosis)'1 100.0000
## 'Did the patient receive hemodialysis during this admission?'1 -31.9149
## 'Was plasma given to the patient during this admission?'1 100.0000
## 'Was the patient placed in a prone position during their admission?'1 20.0344
## 'Age at Admission' 32.7361
## Per_Capita -93.9492
## 'SIRS RR' 70.1148
## SIRS_WBC -85.2590
## SIRS...110 75.5335
## 'Creatinine (if 0 = N/A)' 74.4672
## 'Admission Date:' 87.8781
## 'Please specify: (choice=Diabetes)'1 24.3902
## 'SIRS TEMP' -27800.0000
## 'Please specify: (choice=Chronic- Hepatitis C)'1 100.0000
##
## eQQ Med
## distance 60.702
## 'Insurance Class'COMM 0.000
## 'Insurance Class'MEDICAID 0.000
## 'Insurance Class'MEDICARE 0.000
## 'Insurance Class'OTHER 0.000
## 'Insurance Class'SP 0.000
## 'Race:'American Indian/Alaskan Native 0.000
## 'Race:'Asian 0.000
## 'Race:'Black 0.000
## 'Race:'Native Hawaiian/Pacific Isle 0.000
## 'Race:'Other 0.000
## 'Race:'Unknown 0.000
## 'Does the patient have a history of cancer?'1 0.000
## 'Please specify: (choice=Hypertension)'1 0.000
## 'Please specify: (choice=Coronary Artery Disease)'1 0.000
## 'Please specify: (choice=Congestive Heart Failure)'1 0.000
## 'Please specify: (choice=Asthma)'1 0.000
## 'Please specify: (choice=Chronic Obstructive Pulmonary Disease)'1 0.000

```

|                                                                          |           |
|--------------------------------------------------------------------------|-----------|
| ## 'Please specify: (choice=Chronic Renal Insufficiency)'1               | 0.000     |
| ## 'Please specify: (choice=Cirrhosis)'1                                 | 0.000     |
| ## 'Did the patient receive hemodialysis during this admission?'1        | 0.000     |
| ## 'Was plasma given to the patient during this admission?'1             | 0.000     |
| ## 'Was the patient placed in a prone position during their admission?'1 | 0.000     |
| ## 'Age at Admission'                                                    | 0.000     |
| ## Per_Capita                                                            | 0.000     |
| ## 'SIRS RR'                                                             | 0.000     |
| ## SIRS_WBC                                                              | 0.000     |
| ## SIRS...110                                                            | 0.000     |
| ## 'Creatinine (if 0 = N/A)'                                             | 0.000     |
| ## 'Admission Date:'                                                     | 62.500    |
| ## 'Please specify: (choice=Diabetes)'1                                  | 0.000     |
| ## 'SIRS TEMP'                                                           | 0.000     |
| ## 'Please specify: (choice=Chronic- Hepatitis C)'1                      | 0.000     |
| ##                                                                       | eQQ Mean  |
| ## distance                                                              | 54.0474   |
| ## 'Insurance Class'COMM                                                 | 83.3333   |
| ## 'Insurance Class'MEDICAID                                             | 50.0000   |
| ## 'Insurance Class'MEDICARE                                             | 53.8462   |
| ## 'Insurance Class'OTHER                                                | 0.0000    |
| ## 'Insurance Class'SP                                                   | -100.0000 |
| ## 'Race:'American Indian/Alaskan Native                                 | -Inf      |
| ## 'Race:'Asian                                                          | 0.0000    |
| ## 'Race:'Black                                                          | 0.0000    |
| ## 'Race:'Native Hawaiian/Pacific Isle                                   | 0.0000    |
| ## 'Race:'Other                                                          | 25.0000   |
| ## 'Race:'Unknown                                                        | 33.3333   |
| ## 'Does the patient have a history of cancer?'1                         | 0.0000    |
| ## 'Please specify: (choice=Hypertension)'1                              | 22.2222   |
| ## 'Please specify: (choice=Coronary Artery Disease)'1                   | 0.0000    |
| ## 'Please specify: (choice=Congestive Heart Failure)'1                  | 83.3333   |
| ## 'Please specify: (choice=Asthma)'1                                    | 0.0000    |
| ## 'Please specify: (choice=Chronic Obstructive Pulmonary Disease)'1     | 0.0000    |
| ## 'Please specify: (choice=Chronic Renal Insufficiency)'1               | 0.0000    |
| ## 'Please specify: (choice=Cirrhosis)'1                                 | 100.0000  |
| ## 'Did the patient receive hemodialysis during this admission?'1        | -100.0000 |
| ## 'Was plasma given to the patient during this admission?'1             | 100.0000  |
| ## 'Was the patient placed in a prone position during their admission?'1 | 20.0000   |
| ## 'Age at Admission'                                                    | 6.1571    |
| ## Per_Capita                                                            | 38.5522   |
| ## 'SIRS RR'                                                             | 70.8333   |
| ## SIRS_WBC                                                              | -66.6667  |
| ## SIRS...110                                                            | 76.9231   |
| ## 'Creatinine (if 0 = N/A)'                                             | 69.4853   |
| ## 'Admission Date:'                                                     | 63.5210   |
| ## 'Please specify: (choice=Diabetes)'1                                  | 0.0000    |
| ## 'SIRS TEMP'                                                           | -Inf      |
| ## 'Please specify: (choice=Chronic- Hepatitis C)'1                      | 100.0000  |
| ##                                                                       | eQQ Max   |
| ## distance                                                              | 25.3764   |
| ## 'Insurance Class'COMM                                                 | 0.0000    |
| ## 'Insurance Class'MEDICAID                                             | 0.0000    |
| ## 'Insurance Class'MEDICARE                                             | 0.0000    |

```

## 'Insurance Class'OTHER                                0.0000
## 'Insurance Class'SP                                  0.0000
## 'Race:'American Indian/Alaskan Native                -Inf
## 'Race:'Asian                                          0.0000
## 'Race:'Black                                          0.0000
## 'Race:'Native Hawaiian/Pacific Isle                  0.0000
## 'Race:'Other                                          0.0000
## 'Race:'Unknown                                        0.0000
## 'Does the patient have a history of cancer?'1        0.0000
## 'Please specify: (choice=Hypertension)'1              0.0000
## 'Please specify: (choice=Coronary Artery Disease)'1   0.0000
## 'Please specify: (choice=Congestive Heart Failure)'1  0.0000
## 'Please specify: (choice=Asthma)'1                    0.0000
## 'Please specify: (choice=Chronic Obstructive Pulmonary Disease)'1 0.0000
## 'Please specify: (choice=Chronic Renal Insufficiency)'1 0.0000
## 'Please specify: (choice=Cirrhosis)'1                 100.0000
## 'Did the patient receive hemodialysis during this admission?'1 0.0000
## 'Was plasma given to the patient during this admission?'1 100.0000
## 'Was the patient placed in a prone position during their admission?'1 0.0000
## 'Age at Admission'                                   0.0000
## Per_Capita                                           88.0169
## 'SIRS RR'                                            0.0000
## SIRS_WBC                                             0.0000
## SIRS...110                                           0.0000
## 'Creatinine (if 0 = N/A)'                            87.2881
## 'Admission Date:'                                    64.8649
## 'Please specify: (choice=Diabetes)'1                  0.0000
## 'SIRS TEMP'                                          -Inf
## 'Please specify: (choice=Chronic- Hepatitis C)'1     100.0000
##
## Sample sizes:
##           Control Treated
## All           279    116
## Matched       116    116
## Unmatched     163     0
## Discarded      0     0

```

```

matched.cohort.hcq.2.sirs.1.no.labs = get_matches(my.full.match.hcq.sirs.1.no.labs, hcq.select.no.labs)

# is there any differene between the groups
binary.variables.hcq.2.sirs.1.no.labs = matched.cohort.hcq.2.sirs.1.no.labs %>%
  dplyr::select(Was.plasma.given.to.the.patient.during.this.admission., Does.the.patient.have.a.history)

chi.p.exit.3.hcq.2.sirs.1.no.labs = vector()
chi.variable.name.3.hcq.2.sirs.1.no.labs = vector()

for ( i in c(1:8,10:11, 13:15)) { # cirrhosis , hep c
  variable.1 = binary.variables.hcq.2.sirs.1.no.labs[[i]][binary.variables.hcq.2.sirs.1.no.labs$COVID.1]
  variable.0 = binary.variables.hcq.2.sirs.1.no.labs[[i]][binary.variables.hcq.2.sirs.1.no.labs$COVID.0]
  chisquare.test = chisq.test(variable.1, variable.0)
  chisquare.test.p.value = chisquare.test$p.value
  chi.p.exit.3.hcq.2.sirs.1.no.labs[i] = chisquare.test.p.value
  chi.variable.name.3.hcq.2.sirs.1.no.labs[i] = colnames(binary.variables.hcq.2.sirs.1.no.labs)[i]
}

```

```

## Warning in chisq.test(variable.1, variable.0): Chi-squared approximation may be
## incorrect

## Warning in chisq.test(variable.1, variable.0): Chi-squared approximation may be
## incorrect

## Warning in chisq.test(variable.1, variable.0): Chi-squared approximation may be
## incorrect

## Warning in chisq.test(variable.1, variable.0): Chi-squared approximation may be
## incorrect

## Warning in chisq.test(variable.1, variable.0): Chi-squared approximation may be
## incorrect

## Warning in chisq.test(variable.1, variable.0): Chi-squared approximation may be
## incorrect

## Warning in chisq.test(variable.1, variable.0): Chi-squared approximation may be
## incorrect

## Warning in chisq.test(variable.1, variable.0): Chi-squared approximation may be
## incorrect

## Warning in chisq.test(variable.1, variable.0): Chi-squared approximation may be
## incorrect

## Warning in chisq.test(variable.1, variable.0): Chi-squared approximation may be
## incorrect

## Warning in chisq.test(variable.1, variable.0): Chi-squared approximation may be
## incorrect

## Warning in chisq.test(variable.1, variable.0): Chi-squared approximation may be
## incorrect

```

```

chi.df.3.hcq.2.sirs.1.no.labs = data.frame(chi.variable.name.3.hcq.2.sirs.1.no.labs, chi.p.exit.3.hcq.2
numerical.variables.hcq.2.sirs.1.no.labs = matched.cohort.hcq.2.sirs.1.no.labs %>%
  dplyr::select(COVID..Was.hydroxychloroquine..Plaquenil..given.during.the.patient.s.admission., Age.at

p.value.exit.3.hcq.2.sirs.1.no.labs = vector()
variable.name.exit.3.hcq.2.sirs.1.no.labs = vector()

for ( i in c(2:7, 9:ncol(numerical.variables.hcq.2.sirs.1.no.labs))) { # first column is hcq # skip dat
  variable.1 = numerical.variables.hcq.2.sirs.1.no.labs[[i]][numerical.variables.hcq.2.sirs.1.no.labs$C
  variable.0 = numerical.variables.hcq.2.sirs.1.no.labs[[i]][numerical.variables.hcq.2.sirs.1.no.labs$C
  middle.t.test = t.test(variable.1, variable.0)
  t.test.p.value = middle.t.test$p.value
  p.value.exit.3.hcq.2.sirs.1.no.labs[i] = t.test.p.value
  variable.name.exit.3.hcq.2.sirs.1.no.labs[i] = colnames(numerical.variables.hcq.2.sirs.2.no.labs)[i]
}

t.test.df.hcq.3.sirs.1.no.labs = data.frame(variable.name.exit.3.hcq.2.sirs.1.no.labs, p.value.exit.3.h
match.hcq.2.glm.sirs.1.no.labs = glm(death ~ COVID..Was.hydroxychloroquine..Plaquenil..given.during.the

```

```
match.hcq.2.summary.sirs.1.no.labs = summary(match.hcq.2.glm.sirs.1.no.labs) # p 0.00067
match.hcq.2.conf.intervals.sirs.1.no.labs = exp(cbind(coef(match.hcq.2.glm.sirs.1.no.labs), confint(mat
```

```
## Waiting for profiling to be done...
```

```
# demographics
## for saturated logistic regression with labs
# data: saturated.log.reg.conf.intervals.df
# cohort; complete.df
model.1.reds = complete.df$`REDCap Record ID`
model.1.dems = merged.data[merged.data$`REDCap Record ID` %in% model.1.reds,]
model.1.dems = droplevels(model.1.dems)

dem.cat.vars = c(3:67, 102)
model.1.cat.vars = model.1.dems[dem.cat.vars]
model.1.cat.vars.table = sapply(model.1.cat.vars, table)
model.1.cat.vars.table.df = data.frame(unlist(model.1.cat.vars.table))

dem.cont.vars = c(68:93)
model.1.cont.vars = model.1.dems[dem.cont.vars]
model.1.cont.vars.table = sapply(model.1.cont.vars, summary)
model.1.cont.vars.means = data.frame(sapply(model.1.cont.vars.table, "[", 3))

## for saturated logistic regression with out labs
# data: saturated.log.reg.no.labs.conf.intervals.df
# cohort: no.labs.dems.na

model.2.reds = no.labs.dems.na$`REDCap Record ID`
model.2.dems = merged.data[merged.data$`REDCap Record ID` %in% model.2.reds,]
model.2.dems = droplevels(model.2.dems)

dem.cat.vars.2 = c(3:67, 102)
model.2.cat.vars = model.2.dems[dem.cat.vars.2]
model.2.cat.vars.table = sapply(model.2.cat.vars, table)
model.2.cat.vars.table.df = data.frame(unlist(model.2.cat.vars.table))

dem.cont.vars.2 = c(68:93)
model.2.cont.vars = model.2.dems[dem.cont.vars.2]
model.2.cont.vars.table = sapply(model.2.cont.vars, summary)
model.2.cont.vars.means = data.frame(sapply(model.2.cont.vars.table, "[", 3))

# for quick death data
## data: quick.death.conf.intervals.df
# cohort quick.dems.na

model.3.reds = quick.dems.na$`REDCap Record ID`
model.3.dems = merged.data[merged.data$`REDCap Record ID` %in% model.3.reds,]
model.3.dems = droplevels(model.3.dems)

dem.cat.vars.3 = c(3:67, 102)
model.3.cat.vars = model.3.dems[dem.cat.vars.3]
model.3.cat.vars.table = sapply(model.3.cat.vars, table)
model.3.cat.vars.table.df = data.frame(unlist(model.3.cat.vars.table))
```

```

dem.cont.vars.3 = c(68:93)
model.3.cont.vars = model.3.dems[dem.cont.vars.3]
model.3.cont.vars.table = sapply(model.3.cont.vars, summary)
model.3.cont.vars.means = data.frame(sapply(model.3.cont.vars.table, "[", 3))

# model 2 b
## data:
## cohort: quick.death.variables.selected.crp.dem.na

model.2b.reds = quick.death.variables.selected.crp.dem.na$`REDCap Record ID`
model.2b.dems = merged.data[merged.data$`REDCap Record ID` %in% model.2b.reds,]
model.2b.dems = droplevels(model.2b.dems)

dem.cat.vars.2b = c(3:67, 102)
model.2b.cat.vars = model.2b.dems[dem.cat.vars.2b]
model.2b.cat.vars.table = sapply(model.2b.cat.vars, table)
model.2b.cat.vars.table.df = data.frame(unlist(model.2b.cat.vars.table))

dem.cont.vars.2b = c(68:93)
model.2b.cont.vars = model.2b.dems[dem.cont.vars.2b]
model.2b.cont.vars.table = sapply(model.2b.cont.vars, summary)
model.2b.cont.vars.means = data.frame(sapply(model.2b.cont.vars.table, "[", 3))

# for hcq
#data: match.hcq.conf.intervals
#cohort: matched.cohort.hcq

model.4.reds = matched.cohort.hcq$`REDCap Record ID`
model.4.dems = merged.data[merged.data$`REDCap Record ID` %in% model.4.reds,]
model.4.dems = droplevels(model.4.dems)

dem.cat.vars.4 = c(3:67, 102)
model.4.cat.vars = model.4.dems[dem.cat.vars.4]
model.4.cat.vars.table = sapply(model.4.cat.vars, table)
model.4.cat.vars.table.df = data.frame(unlist(model.4.cat.vars.table))

dem.cont.vars.4 = c(68:93)
model.4.cont.vars = model.4.dems[dem.cont.vars.4]
model.4.cont.vars.table = sapply(model.4.cont.vars, summary)
model.4.cont.vars.means = data.frame(sapply(model.4.cont.vars.table, "[", 3))

# for matched plasma (with labs )
# data : simple output in section
# cohort : matched.cohort

model.5.reds = matched.cohort$REDCap.Record.ID
model.5.dems = merged.data[merged.data$`REDCap Record ID` %in% model.5.reds,]
model.5.dems = droplevels(model.5.dems)

dem.cat.vars.5 = c(3:67, 102)
model.5.cat.vars = model.5.dems[dem.cat.vars.5]
model.5.cat.vars.table = sapply(model.5.cat.vars, table)
model.5.cat.vars.table.df = data.frame(unlist(model.5.cat.vars.table))

```

```

dem.cont.vars.5 = c(68:93)
model.5.cont.vars = model.5.dems[dem.cont.vars.5]
model.5.cont.vars.table = sapply(model.5.cont.vars, summary)
model.5.cont.vars.means = data.frame(sapply(model.5.cont.vars.table, "[", 3))

## put together
library(plyr)
cat.1.2 = merge(model.1.cat.vars.table.df, model.2.cat.vars.table.df, by = 0, all = T)
rownames(cat.1.2) <- cat.1.2[,1]
cat.1.2 <- cat.1.2[,-1]
cat.3 = merge(cat.1.2, model.3.cat.vars.table.df, by = 0, all = T)
rownames(cat.3) <- cat.3[,1]
cat.3 <- cat.3[,-1]
cat.4 = merge(cat.3, model.4.cat.vars.table.df, by = 0, all = T)
rownames(cat.4) <- cat.4[,1]
cat.4 <- cat.4[,-1]
cat.5 = merge(cat.4, model.5.cat.vars.table.df, by = 0, all = T)
rownames(cat.5) <- cat.5[,1]
cat.5 <- cat.5[,-1]
cat.6 = cat.5

cat.7 = merge(cat.6, model.2b.cat.vars.table.df, by = 0, all = T)
rownames(cat.7) <- cat.7[,1]
cat.7 <- cat.7[,-1]

cont.1.2 = merge(model.1.cont.vars.means, model.2.cont.vars.means, by = 0, all = T)
rownames(cont.1.2) <- cont.1.2[,1]
cont.1.2 <- cont.1.2[,-1]
cont.3 = merge(cont.1.2, model.3.cont.vars.means, by = 0, all = T)
rownames(cont.3) <- cont.3[,1]
cont.3 <- cont.3[,-1]
cont.4 = merge(cont.3, model.4.cont.vars.means, by = 0, all = T)
rownames(cont.4) <- cont.4[,1]
cont.4 <- cont.4[,-1]
cont.5 = merge(cont.4, model.5.cont.vars.means, by = 0, all = T)
rownames(cont.5) <- cont.5[,1]
cont.5 <- cont.5[,-1]
cont.6 = cont.5

cont.7 = merge(cont.6, model.2b.cont.vars.means, by = 0, all = T)
rownames(cont.7) <- cont.7[,1]
cont.7 <- cont.7[,-1]

```

```

# demographics p matching
# hcq match with labs
# matched.cohort.hcq

```

```

## yes

```

```

model.3a.reds = matched.cohort.hcq$REDCap.Record.ID[matched.cohort.hcq$COVID..Was.hydroxychloroquine..P
model.3a.dems = merged.data[merged.data$'REDCap Record ID' %in% model.3a.reds,]

```



```

model.3a.dems = droplevels(model.3a.dems)

dem.cat.vars.3a = c(3:67, 102)
model.3a.cat.vars = model.3a.dems[dem.cat.vars.3a]
model.3a.cat.vars.table = sapply(model.3a.cat.vars, table)
model.3a.cat.vars.table.df = data.frame(unlist(model.3a.cat.vars.table))

dem.cont.vars.3a = c(68:93)
model.3a.cont.vars = model.3a.dems[dem.cont.vars.3a]
model.3a.cont.vars.table = sapply(model.3a.cont.vars, summary)
model.3a.cont.vars.means = data.frame(sapply(model.3a.cont.vars.table, "[", 4))

## no
model.3a.reds.0 = matched.cohort.hcq$REDCap.Record.ID[matched.cohort.hcq$COVID..Was.hydroxychloroquine.
model.3a.dems.0 = merged.data[merged.data$REDCap.Record.ID %in% model.3a.reds.0,]
model.3a.dems.0 = droplevels(model.3a.dems.0)

dem.cat.vars.3a.0 = c(3:67, 102)
model.3a.cat.vars.0 = model.3a.dems.0[dem.cat.vars.3a.0]
model.3a.cat.vars.table.0 = sapply(model.3a.cat.vars.0, table)
model.3a.cat.vars.table.df.0 = data.frame(unlist(model.3a.cat.vars.table.0))

dem.cont.vars.3a.0 = c(68:93)
model.3a.cont.vars.0 = model.3a.dems.0[dem.cont.vars.3a.0]
model.3a.cont.vars.table.0 = lapply(model.3a.cont.vars.0, summary)
model.3a.cont.vars.means.0 = data.frame(sapply(model.3a.cont.vars.table.0, "[", 4))

model.3a.cat = merge(model.3a.cat.vars.table.df, model.3a.cat.vars.table.df.0, by = 0, all = T)
rownames(model.3a.cat) <- model.3a.cat[,1]
model.3a.cat <- model.3a.cat[,-1]
model.3a.cont = merge(model.3a.cont.vars.means, model.3a.cont.vars.means.0, by = 0, all = T)
rownames(model.3a.cont) <- model.3a.cont[,1]
model.3a.cont <- model.3a.cont[,-1]

# hcq match no labs
#matched.cohort.hcq.2

model.3b.reds = matched.cohort.hcq.2$REDCap.Record.ID[matched.cohort.hcq.2$COVID..Was.hydroxychloroquine.
model.3b.dems = merged.data[merged.data$REDCap.Record.ID %in% model.3b.reds,]
model.3b.dems = droplevels(model.3b.dems)

dem.cat.vars.3b = c(3:67, 102)
model.3b.cat.vars = model.3b.dems[dem.cat.vars.3b]
model.3b.cat.vars.table = sapply(model.3b.cat.vars, table)
model.3b.cat.vars.table.df = data.frame(unlist(model.3b.cat.vars.table))

dem.cont.vars.3b = c(68:93)
model.3b.cont.vars = model.3b.dems[dem.cont.vars.3b]
model.3b.cont.vars.table = sapply(model.3b.cont.vars, summary)
model.3b.cont.vars.means = data.frame(sapply(model.3b.cont.vars.table, "[", 4))

model.3b.reds.0 = matched.cohort.hcq.2$REDCap.Record.ID[matched.cohort.hcq.2$COVID..Was.hydroxychloroquine.

```

```

model.3b.dems.0 = merged.data[merged.data$'REDCap Record ID' %in% model.3b.reds.0,]
model.3b.dems.0 = droplevels(model.3b.dems.0)

dem.cat.vars.3b.0 = c(3:67, 102)
model.3b.cat.vars.0 = model.3b.dems.0[dem.cat.vars.3b.0]
model.3b.cat.vars.table.0 = sapply(model.3b.cat.vars.0, table)
model.3b.cat.vars.table.df.0 = data.frame(unlist(model.3b.cat.vars.table.0))

dem.cont.vars.3b.0 = c(68:93)
model.3b.cont.vars.0 = model.3b.dems.0[dem.cont.vars.3b.0]
model.3b.cont.vars.table.0 = lapply(model.3b.cont.vars.0, summary)
model.3b.cont.vars.means.0 = data.frame(sapply(model.3b.cont.vars.table.0, "[", 4))

model.3b.cat = merge(model.3b.cat.vars.table.df, model.3b.cat.vars.table.df.0, by = 0, all = T)
rownames(model.3b.cat) <- model.3b.cat[,1]
model.3b.cat <- model.3b.cat[,-1]
model.3b.cont = merge(model.3b.cont.vars.means, model.3b.cont.vars.means.0, by = 0, all = T)
rownames(model.3b.cont) <- model.3b.cont[,1]
model.3b.cont <- model.3b.cont[,-1]

# plasma match with labs
#matched.cohort

model.4a.reds = matched.cohort$REDCap.Record.ID[matched.cohort$Was.plasma.given.to.the.patient.during.t
model.4a.dems = merged.data[merged.data$'REDCap Record ID' %in% model.4a.reds,]
model.4a.dems = droplevels(model.4a.dems)

dem.cat.vars.4a = c(3:67, 102)
model.4a.cat.vars = model.4a.dems[dem.cat.vars.4a]
model.4a.cat.vars.table = sapply(model.4a.cat.vars, table)
model.4a.cat.vars.table.df = data.frame(unlist(model.4a.cat.vars.table))

dem.cont.vars.4a = c(68:93)
model.4a.cont.vars = model.4a.dems[dem.cont.vars.4a]
model.4a.cont.vars.table = sapply(model.4a.cont.vars, summary)
model.4a.cont.vars.means = data.frame(sapply(model.4a.cont.vars.table, "[", 4))

model.4a.reds.0 = matched.cohort$REDCap.Record.ID[matched.cohort$Was.plasma.given.to.the.patient.during
model.4a.dems.0 = merged.data[merged.data$'REDCap Record ID' %in% model.4a.reds.0,]
model.4a.dems.0 = droplevels(model.4a.dems.0)

dem.cat.vars.4a.0 = c(3:67, 102)
model.4a.cat.vars.0 = model.4a.dems.0[dem.cat.vars.4a.0]
model.4a.cat.vars.table.0 = sapply(model.4a.cat.vars.0, table)
model.4a.cat.vars.table.df.0 = data.frame(unlist(model.4a.cat.vars.table.0))

dem.cont.vars.4a.0 = c(68:93)
model.4a.cont.vars.0 = model.4a.dems.0[dem.cont.vars.4a.0]
model.4a.cont.vars.table.0 = lapply(model.4a.cont.vars.0, summary)
model.4a.cont.vars.means.0 = data.frame(sapply(model.4a.cont.vars.table.0, "[", 4))

model.4a.cat = merge(model.4a.cat.vars.table.df, model.4a.cat.vars.table.df.0, by = 0, all = T)

```

```

rownames(model.4a.cat) <- model.4a.cat[,1]
model.4a.cat <- model.4a.cat[,-1]
model.4a.cont = merge(model.4a.cont.vars.means, model.4a.cont.vars.means.0, by = 0, all = T)
rownames(model.4a.cont) <- model.4a.cont[,1]
model.4a.cont <- model.4a.cont[,-1]

# plasma match without labs
# matched.cohort.3.dem
model.4b.reds = matched.cohort.3.dem$REDCap.Record.ID[matched.cohort.3.dem$Was.plasma.given.to.the.patien
model.4b.dems = merged.data[merged.data$'REDCap Record ID' %in% model.4b.reds,]
model.4b.dems = droplevels(model.4a.dems)

dem.cat.vars.4b = c(3:67, 102)
model.4b.cat.vars = model.4a.dems[dem.cat.vars.4b]
model.4b.cat.vars.table = sapply(model.4b.cat.vars, table)
model.4b.cat.vars.table.df = data.frame(unlist(model.4b.cat.vars.table))

dem.cont.vars.4b = c(68:93)
model.4b.cont.vars = model.4b.dems[dem.cont.vars.4b]
model.4b.cont.vars.table = sapply(model.4b.cont.vars, summary)
model.4b.cont.vars.means = data.frame(sapply(model.4b.cont.vars.table, "[", 4))

model.4b.reds.0 = matched.cohort.3.dem$REDCap.Record.ID[matched.cohort.3.dem$Was.plasma.given.to.the.patien
model.4b.dems.0 = merged.data[merged.data$'REDCap Record ID' %in% model.4b.reds.0,]
model.4b.dems.0 = droplevels(model.4b.dems.0)

dem.cat.vars.4b.0 = c(3:67, 102)
model.4b.cat.vars.0 = model.4b.dems.0[dem.cat.vars.4b.0]
model.4b.cat.vars.table.0 = sapply(model.4b.cat.vars.0, table)
model.4b.cat.vars.table.df.0 = data.frame(unlist(model.4b.cat.vars.table.0))

dem.cont.vars.4b.0 = c(68:93)
model.4b.cont.vars.0 = model.4a.dems.0[dem.cont.vars.4b.0]
model.4b.cont.vars.table.0 = lapply(model.4b.cont.vars.0, summary)
model.4b.cont.vars.means.0 = data.frame(sapply(model.4b.cont.vars.table.0, "[", 4))

model.4b.cat = merge(model.4b.cat.vars.table.df, model.4b.cat.vars.table.df.0, by = 0, all = T)
rownames(model.4b.cat) <- model.4b.cat[,1]
model.4b.cat <- model.4b.cat[,-1]
model.4b.cont = merge(model.4b.cont.vars.means, model.4b.cont.vars.means.0, by = 0, all = T)
rownames(model.4b.cont) <- model.4b.cont[,1]
model.4b.cont <- model.4b.cont[,-1]

model.3a.b.cat = merge(model.3a.cat, model.3b.cat, by = 0, all = T)
rownames(model.3a.b.cat) <- model.3a.b.cat[,1]
model.3a.b.cat <- model.3a.b.cat[,-1]

model.3.4a.cat = merge(model.3a.b.cat, model.4a.cat, by = 0, all = T)
rownames(model.3.4a.cat) <- model.3.4a.cat[,1]
model.3.4a.cat <- model.3.4a.cat[,-1]

```

```

model.3.4.cat = merge(model.3.4a.cat, model.4b.cat, by = 0 , all = T)
rownames(model.3.4.cat) <- model.3.4.cat[,1]
model.3.4.cat <- model.3.4.cat[,-1]

model.3a.b.cont = merge(model.3a.cont , model.3b.cont , by = 0 , all = T)
rownames(model.3a.b.cont ) <- model.3a.b.cont[,1]
model.3a.b.cont <- model.3a.b.cont[,-1]

model.3.4a.cont = merge(model.3a.b.cont , model.4a.cont , by = 0 , all = T)
rownames(model.3.4a.cont ) <- model.3.4a.cont[,1]
model.3.4a.cont <- model.3.4a.cont[,-1]

model.3.4.cont = merge(model.3.4a.cont , model.4b.cont , by = 0 , all = T)
rownames(model.3.4.cont ) <- model.3.4.cont[,1]
model.3.4.cont <- model.3.4.cont[,-1]

# need to get date
all.p.score.data = list(model.3a.dems, model.3a.dems.0, model.3b.dems, model.3b.dems.0, model.4a.dems, model.4a.dems.0)
for ( i in 1:length(all.p.score.data)){
  middle.frame = all.p.score.data[[i]]
  print(median(middle.frame$`Admission Date:`))
}

```

```

## [1] "2020-04-06"
## [1] "2020-04-12"
## [1] "2020-04-04"
## [1] "2020-04-05"
## [1] "2020-04-16"
## [1] "2020-04-21"
## [1] "2020-04-16"
## [1] "2020-04-13"

```

```

## data outputs

# model 1a (saturated with labs)
model.1a = saturated.log.reg.conf.intervals.df
# model 1b (saturated without labs)
model.1b = saturated.log.reg.no.labs.conf.intervals.df
# model 2a (saturated with labs)
model.2a = quick.death.conf.intervals.df
# model 2b (saturated with only CRP)
model.2b = quick.death.just.crp.conf.intervals.df
# model 3a (matched hcq with labs)
match.hcq.summary

```

```

##
## Call:
## glm(formula = death ~ COVID..Was.hydroxychloroquine..Plaquenil..given.during.the.patient.s.admission,
##      family = binomial, data = matched.cohort)
##
## Deviance Residuals:
##      Min       1Q   Median       3Q      Max

```

```

## -1.2968 -0.7892 -0.7892 1.0626 1.6237
##
## Coefficients:
##
## Estimate
## (Intercept) -1.0068
## COVID..Was.hydroxychloroquine..Plaquenil..given.during.the.patient.s.admission.1 1.2831
## Std. Error
## (Intercept) 0.2681
## COVID..Was.hydroxychloroquine..Plaquenil..given.during.the.patient.s.admission.1 0.3896
## z value
## (Intercept) -3.756
## COVID..Was.hydroxychloroquine..Plaquenil..given.during.the.patient.s.admission.1 3.293
## Pr(>|z|)
## (Intercept) 0.000173
## COVID..Was.hydroxychloroquine..Plaquenil..given.during.the.patient.s.admission.1 0.000991
##
## (Intercept) ***
## COVID..Was.hydroxychloroquine..Plaquenil..given.during.the.patient.s.admission.1 ***
## ---
## Signif. codes: 0 '***' 0.001 '**' 0.01 '*' 0.05 '.' 0.1 ' ' 1
##
## (Dispersion parameter for binomial family taken to be 1)
##
## Null deviance: 163.54 on 121 degrees of freedom
## Residual deviance: 152.22 on 120 degrees of freedom
## AIC: 156.22
##
## Number of Fisher Scoring iterations: 4

```

#### match.hcq.conf.intervals

```

##
## (Intercept) 0.3653846
## COVID..Was.hydroxychloroquine..Plaquenil..given.during.the.patient.s.admission.1 3.6076555
## 2.5 %
## (Intercept) 0.2107692
## COVID..Was.hydroxychloroquine..Plaquenil..given.during.the.patient.s.admission.1 1.7001885
## 97.5 %
## (Intercept) 0.6067198
## COVID..Was.hydroxychloroquine..Plaquenil..given.during.the.patient.s.admission.1 7.8706095

```

#### # model 3b (matched hcq without labs )

#### match.hcq.2.conf.intervals.sirs.2.no.labs

```

##
## (Intercept) 0.3181818
## COVID..Was.hydroxychloroquine..Plaquenil..given.during.the.patient.s.admission.1 1.5013649
## 2.5 %
## (Intercept) 0.2335689
## COVID..Was.hydroxychloroquine..Plaquenil..given.during.the.patient.s.admission.1 1.0004583
## 97.5 %
## (Intercept) 0.4267188
## COVID..Was.hydroxychloroquine..Plaquenil..given.during.the.patient.s.admission.1 2.2631101

```

```
match.hcq.2.summary.sirs.2.no.labs
```

```
##
## Call:
## glm(formula = death ~ COVID..Was.hydroxychloroquine..Plaquenil..given.during.the.patient.s.admission,
##       family = binomial, data = matched.cohort.hcq.2.sirs.2.no.labs)
##
## Deviance Residuals:
##      Min       1Q   Median       3Q      Max
## -0.8837  -0.8837  -0.7433   1.5028   1.6861
##
## Coefficients:
##                                     Estimate
## (Intercept)                        -1.1451
## COVID..Was.hydroxychloroquine..Plaquenil..given.during.the.patient.s.admission.1  0.4064
##                                     Std. Error
## (Intercept)                          0.1534
## COVID..Was.hydroxychloroquine..Plaquenil..given.during.the.patient.s.admission.1  0.2079
##                                     z value
## (Intercept)                          -7.464
## COVID..Was.hydroxychloroquine..Plaquenil..given.during.the.patient.s.admission.1  1.954
##                                     Pr(>|z|)
## (Intercept)                           8.4e-14
## COVID..Was.hydroxychloroquine..Plaquenil..given.during.the.patient.s.admission.1  0.0507
##
## (Intercept)                            ***
## COVID..Was.hydroxychloroquine..Plaquenil..given.during.the.patient.s.admission.1 .
## ---
## Signif. codes:  0 '***' 0.001 '**' 0.01 '*' 0.05 '.' 0.1 ' ' 1
##
## (Dispersion parameter for binomial family taken to be 1)
##
##      Null deviance: 552.29  on 463  degrees of freedom
## Residual deviance: 548.44  on 462  degrees of freedom
## AIC: 552.44
##
## Number of Fisher Scoring iterations: 4
```

```
# model 4a (matched plasma with labs)
match.1.summary
```

```
##
## Call:
## glm(formula = death ~ Was.plasma.given.to.the.patient.during.this.admission.,
##       family = binomial, data = matched.cohort)
##
## Deviance Residuals:
##      Min       1Q   Median       3Q      Max
## -1.219  -0.780  -0.780   1.136   1.636
##
## Coefficients:
##
##                                     Estimate Std. Error
```

```

## (Intercept) -1.0341 0.2911
## Was.plasma.given.to.the.patient.during.this.admission.1 1.1325 0.3879
## z value Pr(>|z|)
## (Intercept) -3.553 0.000381 ***
## Was.plasma.given.to.the.patient.during.this.admission.1 2.920 0.003504 **
## ---
## Signif. codes: 0 '***' 0.001 '**' 0.01 '*' 0.05 '.' 0.1 ' ' 1
##
## (Dispersion parameter for binomial family taken to be 1)
##
## Null deviance: 163.54 on 121 degrees of freedom
## Residual deviance: 154.62 on 120 degrees of freedom
## AIC: 158.62
##
## Number of Fisher Scoring iterations: 4

```

```
match.1.conf.intervals
```

```

## 2.5 %
## (Intercept) 0.3555556 0.1950046
## Was.plasma.given.to.the.patient.during.this.admission.1 3.1034483 1.4695238
## 97.5 %
## (Intercept) 0.615440
## Was.plasma.given.to.the.patient.during.this.admission.1 6.761467

```

```
# model 4b (matched plasma without labs )
```

```
match.3.summary
```

```

##
## Call:
## glm(formula = death ~ Was.plasma.given.to.the.patient.during.this.admission.,
##      family = binomial, data = matched.cohort.3)
##
## Deviance Residuals:
##      Min       1Q   Median       3Q      Max
## -1.1855  -0.9479  -0.9479   1.1693   1.4257
##
## Coefficients:
##                                Estimate Std. Error
## (Intercept)                   -0.5671    0.2031
## Was.plasma.given.to.the.patient.during.this.admission.1 0.5862    0.2817
## z value Pr(>|z|)
## (Intercept)                   -2.793 0.00523 **
## Was.plasma.given.to.the.patient.during.this.admission.1 2.081 0.03744 *
## ---
## Signif. codes: 0 '***' 0.001 '**' 0.01 '*' 0.05 '.' 0.1 ' ' 1
##
## (Dispersion parameter for binomial family taken to be 1)
##
## Null deviance: 287.38 on 209 degrees of freedom
## Residual deviance: 283.00 on 208 degrees of freedom
## AIC: 287
##
## Number of Fisher Scoring iterations: 4

```

```
match.3.conf.intervals
```

```
##                                     2.5 %  
## (Intercept)                        0.5671642 0.3776381  
## Was.plasma.given.to.the.patient.during.this.admission.1 1.7970648 1.0377565  
##                                     97.5 %  
## (Intercept)                        0.8394094  
## Was.plasma.given.to.the.patient.during.this.admission.1 3.1364362
```

```
# model 5 (saturated of just plasma cohort )  
#model.5 = just.plasma.conf.intervals.df
```

```
model.1 = merge(model.1a, model.1b, by = 0, all = T)  
rownames(model.1) <- model.1[,1]  
model.1 <- model.1[,-1] # .x is model 1a .y is model 1b  
  
model.1.2.a = merge(model.1, model.2a, by = 0, all = T)  
rownames(model.1.2.a) <- model.1.2.a[,1]  
model.1.2.a <- model.1.2.a[,-1] # .x is model 1a .y is model 1b no ending is 2a  
  
model.1.2 = merge(model.1.2.a, model.2b, by = 0, all = T)
```

```
## Warning in merge.data.frame(model.1.2.a, model.2b, by = 0, all = T): column  
## names 'V1.x', 'X2.5...x', 'X97.5...x', 'p.values.x', 'V1.y', 'X2.5...y',  
## 'X97.5...y', 'p.values.y' are duplicated in the result
```

```
rownames(model.1.2) <- model.1.2[,1]  
model.1.2 <- model.1.2[,-1] # .x is model 1a .y is model 1b .x.1 is model 2a .y.1 is model 2b
```
