# Supplementary material for: Predictors for inpatient mortality during the first wave of the SARS-CoV-2 pandemic: A retrospective analysis
Source: PubMed Central journal article supplement (PMC8109786; doi:10.1371/journal.pone.0251262), 2021-05-10
Supplement: pone.0251262.s003.pdf [file pone.0251262.s003.pdf]

|    |             |        |                        |         |              |
|----|-------------|--------|------------------------|---------|--------------|
| 1  | Admission 1 | Female | Blue Cross M COMM      | Black   | Not Hispanic |
| 2  | Admission 1 | Male   | Blue Cross In COMM     | White   | Hispanic     |
| 3  | Admission 1 | Female | Blue Cross PI COMM     | Unknown | Hispanic     |
| 4  | Admission 1 | Female | Blue Cross W COMM      | Other   | Not Hispanic |
| 5  | Admission 1 | Female | Blue Cross P COMM      | White   | Hispanic     |
| 6  | Admission 1 | Female | Blue Cross N MEDICARE  | Black   | Unknown      |
| 7  | Admission 1 | Male   | Magna Prefe COMM       | White   | Not Hispanic |
| 8  | Admission 1 | Female | Medicare MEDICARE      | White   | Not Hispanic |
| 9  | Admission 1 | Male   | Emergency N MEDICAID   | White   | Hispanic     |
| 10 | Admission 1 | Female | Emergency N MEDICAID   | Unknown | Hispanic     |
| 11 | Admission 1 | Male   | Emergency N MEDICAID   | White   | Hispanic     |
| 12 | Admission 1 | Male   | Fidel Essenti MEDICAID | Unknown | Not Hispanic |
| 13 | Admission 1 | Female | Better/ Heal MEDICAID  | Asian   | Not Hispanic |
| 14 | Admission 1 | Female | Medicare MEDICARE      | Black   | Not Hispanic |
| 15 | Admission 1 | Female | Emergency N MEDICAID   | Unknown | Hispanic     |
| 16 | Admission 1 | Male   | Emergency N MEDICAID   | Unknown | Hispanic     |
| 17 | Admission 1 | Male   | emergency N MEDICAID   | White   | Not Hispanic |
| 18 | Admission 1 | Female | Cigna Health COMM      | Black   | Unknown      |
| 19 | Admission 1 | Female | Blue Cross PI COMM     | White   | Not Hispanic |
| 20 | Admission 1 | Female | Medicare MEDICARE      | White   | Not Hispanic |
| 21 | Admission 1 | Male   | Medicare MEDICARE      | White   | Not Hispanic |
| 22 | Admission 1 | Male   | Partners Hea COMM      | White   | Not Hispanic |
| 23 | Admission 1 | Female | United Healt MEDICARE  | White   | Not Hispanic |
| 24 | Admission 1 | Male   | Aetna Mcr MEDICARE     | White   | Not Hispanic |
| 25 | Admission 1 | Female | Oxford Healt COMM      | Unknown | Not Hispanic |
| 26 | Admission 1 | Male   | Healthfirst N MEDICARE | White   | Hispanic     |
| 27 | Admission 1 | Male   | Affinity Esse MEDICAID | NA      | Not Hispanic |
| 28 | Admission 1 | Female | Medicare MEDICARE      | White   | Not Hispanic |
| 29 | Admission 1 | Male   | Emblem Hea COMM        | White   | Not Hispanic |
| 30 | Admission 1 | Female | Blue Cross In COMM     | White   | Not Hispanic |
| 31 | Admission 1 | Male   | Oxford COMM            | White   | Not Hispanic |
| 32 | Admission 1 | Female | Better Healtl MEDICAID | Other   | Hispanic     |
| 33 | Admission 1 | Male   | Medicare MEDICARE      | Other   | Hispanic     |
| 34 | Admission 1 | Female | Blue Cross In COMM     | Black   | Not Hispanic |
| 35 | Admission 1 | Male   | Medicare MEDICARE      | Black   | Not Hispanic |
| 36 | Admission 1 | Female | Medicaid Jza SP        | White   | Not Hispanic |
| 37 | Admission 1 | Male   | Emergency N MEDICAID   | Unknown | Hispanic     |
| 38 | Admission 2 | Male   | Emergency N MEDICAID   | NA      | NA           |
| 39 | Admission 1 | Male   | Medicaid MEDICAID      | Black   | Not Hispanic |
| 40 | Admission 1 | Male   | Medicare MEDICARE      | Other   | Hispanic     |
| 41 | Admission 1 | Male   | Healthfirst N MEDICARE | Black   | Not Hispanic |
| 42 | Admission 2 | Male   | Healthfirst N MEDICARE | NA      | NA           |
| 43 | Admission 1 | Male   | Medicare MEDICARE      | White   | Not Hispanic |
| 44 | Admission 1 | Female | Medicare MEDICARE      | White   | Hispanic     |
| 45 | Admission 1 | Female | Better Healtl MEDICAID | Unknown | Hispanic     |

|    |             |        |                        |         |              |
|----|-------------|--------|------------------------|---------|--------------|
| 46 | Admission 1 | Female | UNITED HEAL COMM       | White   | Not Hispanic |
| 47 | Admission 1 | Male   | Medicare MEDICARE      | Unknown | Hispanic     |
| 48 | Admission 1 | Female | Medicare MEDICARE      | Black   | Not Hispanic |
| 49 | Admission 1 | Female | Medicare MEDICARE      | White   | Not Hispanic |
| 50 | Admission 1 | Male   | UNITED HEAL COMM       | Unknown | Hispanic     |
| 51 | Admission 1 | Female | Medicare MEDICARE      | Black   | Not Hispanic |
| 52 | Admission 1 | Male   | Medicaid Jza SP        | Unknown | Unknown      |
| 53 | Admission 1 | Male   | Emergency M MEDICAID   | NA      | Hispanic     |
| 54 | Admission 1 | Male   | Medicaare MEDICARE     | Unknown | Unknown      |
| 55 | Admission 1 | Male   | Blue Cross In COMM     | Other   | Unknown      |
| 56 | Admission 1 | Female | Blue Cross In COMM     | White   | Hispanic     |
| 57 | Admission 1 | Male   | workers com OTHER      | White   | Hispanic     |
| 58 | Admission 1 | Female | Medicaid~† MEDICAID    | White   | Hispanic     |
| 59 | Admission 1 | Male   | United Healt COMM      | Black   | Not Hispanic |
| 60 | Admission 1 | Male   | Archcare Adv MEDICARE  | White   | Not Hispanic |
| 61 | Admission 1 | Male   | Medicare MEDICARE      | Black   | Not Hispanic |
| 62 | Admission 1 | Male   | United Healt MEDICARE  | Unknown | Hispanic     |
| 63 | Admission 1 | Female | Medicare MEDICARE      | White   | Not Hispanic |
| 64 | Admission 1 | Female | Blue Cross PI COMM     | White   | Not Hispanic |
| 65 | Admission 1 | Female | Affinity Heal MEDICAID | Unknown | Hispanic     |
| 66 | Admission 1 | Female | MVP Essenti MEDICAID   | Unknown | Hispanic     |
| 67 | Admission 1 | Male   | Medicare MEDICARE      | White   | Not Hispanic |
| 68 | Admission 1 | Male   | Fidelis Medic MEDICARE | Unknown | Hispanic     |
| 69 | Admission 1 | Male   | Mohawk Vall MEDICAID   | Black   | Not Hispanic |
| 70 | Admission 1 | Male   | Emergency M MEDICAID   | White   | Hispanic     |
| 71 | Admission 1 | Male   | Fidelis excha MEDICAID | Unknown | Not Hispanic |
| 72 | Admission 1 | Female | Medicare MEDICARE      | White   | Not Hispanic |
| 73 | Admission 1 | Male   | Blue Cross PI COMM     | Black   | Not Hispanic |
| 74 | Admission 1 | Male   | Aetna HMO COMM         | White   | Not Hispanic |
| 75 | Admission 1 | Male   | Healthfirst M MEDICARE | Other   | Hispanic     |
| 76 | Admission 1 | Female | Medicare MEDICARE      | White   | Not Hispanic |
| 77 | Admission 1 | Male   | Better Healt MEDICAID  | Black   | Not Hispanic |
| 78 | Admission 1 | Male   | Medicare MEDICARE      | White   | Not Hispanic |
| 79 | Admission 1 | Male   | HIP HMO COMM           | Unknown | Not Hispanic |
| 80 | Admission 1 | Female | Medicare MEDICARE      | White   | Not Hispanic |
| 81 | Admission 1 | Male   | Medicaid MEDICAID      | White   | Not Hispanic |
| 82 | Admission 2 | Male   | Medicaid MEDICAID      | NA      | NA           |
| 83 | Admission 1 | Female | Local 1199 COMM        | Black   | Not Hispanic |
| 84 | Admission 1 | Male   | United Healt MEDICARE  | White   | Not Hispanic |
| 85 | Admission 1 | Male   | Medicare MEDICARE      | White   | Not Hispanic |
| 86 | Admission 1 | Male   | Cigna Health COMM      | Unknown | Unknown      |
| 87 | Admission 1 | Male   | Medicare MEDICARE      | White   | Not Hispanic |
| 88 | Admission 1 | Female | United Healt MEDICARE  | Black   | Not Hispanic |
| 89 | Admission 1 | Male   | Medicare MEDICARE      | White   | Not Hispanic |
| 90 | Admission 1 | Female | Medicare MEDICARE      | White   | Not Hispanic |

|     |             |        |               |          |         |              |
|-----|-------------|--------|---------------|----------|---------|--------------|
| 91  | Admission 1 | Female | Aetna Medic   | MEDICARE | White   | Not Hispanic |
| 92  | Admission 1 | Female | Blue Cross M  | COMM     | White   | Not Hispanic |
| 93  | Admission 1 | Female | Medicare      | MEDICARE | White   | Not Hispanic |
| 94  | Admission 1 | Male   | Medicare      | MEDICARE | White   | Not Hispanic |
| 95  | Admission 1 | Female | Aetna Medic   | MEDICARE | White   | Not Hispanic |
| 96  | Admission 1 | Female | Medicare      | MEDICARE | White   | Not Hispanic |
| 97  | Admission 1 | Male   | United Healt  | COMM     | Black   | Not Hispanic |
| 98  | Admission 1 | Female | Medicare      | MEDICARE | White   | Not Hispanic |
| 99  | Admission 1 | Female | Cigna Health  | COMM     | Asian   | Not Hispanic |
| 100 | Admission 1 | Male   | Blue Cross M  | COMM     | White   | Not Hispanic |
| 101 | Admission 1 | Male   | Blue Cross M  | COMM     | White   | Not Hispanic |
| 102 | Admission 1 | Male   | Medicare      | MEDICARE | White   | Not Hispanic |
| 103 | Admission 1 | Male   | Meritain Hea  | COMM     | White   | Not Hispanic |
| 104 | Admission 1 | Female | Medicare      | MEDICARE | White   | Not Hispanic |
| 105 | Admission 1 | Female | Cigna Health  | COMM     | Black   | Not Hispanic |
| 106 | Admission 1 | Female | Medicare      | MEDICARE | White   | Not Hispanic |
| 107 | Admission 1 | Male   | Blue Cross PI | COMM     | White   | Not Hispanic |
| 108 | Admission 1 | Female | Blue Cross M  | COMM     | White   | Not Hispanic |
| 109 | Admission 1 | Male   | Blue Cross S' | COMM     | Black   | Not Hispanic |
| 110 | Admission 1 | Male   | Medicare      | MEDICARE | White   | Not Hispanic |
| 111 | Admission 2 | Male   | Medicare      | MEDICARE | NA      | NA           |
| 112 | Admission 1 | Male   | Medicare      | MEDICARE | Unknown | Not Hispanic |
| 113 | Admission 1 | Male   | Medicare      | MEDICARE | NA      | Hispanic     |
| 114 | Admission 1 | Female | Medicare      | MEDICARE | Black   | Not Hispanic |
| 115 | Admission 1 | Female | Aetna Medic   | MEDICARE | White   | Not Hispanic |
| 116 | Admission 2 | Female | Aetna Medic   | MEDICARE | NA      | NA           |
| 117 | Admission 1 | Male   | HIP Medicare  | MEDICARE | Black   | Not Hispanic |
| 118 | Admission 1 | Male   | Fidelis Excha | MEDICAID | White   | Not Hispanic |
| 119 | Admission 1 | Male   | Mohawk Vall   | MEDICAID | Unknown | Hispanic     |
| 120 | Admission 1 | Male   | Blue Cross O  | COMM     | Black   | Unknown      |
| 121 | Admission 1 | Female | Blue Cross M  | MEDICARE | Black   | Not Hispanic |
| 122 | Admission 1 | Male   | Better Healt  | MEDICAID | Black   | Not Hispanic |
| 123 | Admission 1 | Male   | Aetna Pos     | COMM     | Black   | Not Hispanic |
| 124 | Admission 1 | Male   | Oxford Healt  | COMM     | Unknown | Not Hispanic |
| 125 | Admission 1 | Female | Medicare      | MEDICARE | Black   | Not Hispanic |
| 126 | Admission 1 | Male   | Mohawk Vall   | MEDICAID | White   | Not Hispanic |
| 127 | Admission 1 | Female | Aetna Medic   | MEDICARE | Black   | Not Hispanic |
| 128 | Admission 1 | Male   | Oxford Healt  | COMM     | Black   | Not Hispanic |
| 129 | Admission 1 | Female | Oxford Healt  | COMM     | Unknown | Not Hispanic |
| 130 | Admission 1 | Male   | Fidelis Excha | MEDICAID | White   | Not Hispanic |
| 131 | Admission 1 | Male   | Medicare      | MEDICARE | White   | Not Hispanic |
| 132 | Admission 1 | Male   | Aetna Medic   | MEDICARE | Black   | Not Hispanic |
| 133 | Admission 2 | Male   | Aetna Medic   | MEDICARE | NA      | NA           |
| 134 | Admission 1 | Female | MVP Premier   | MEDICAID | White   | Not Hispanic |
| 135 | Admission 1 | Male   | Blue cross    | COMM     | White   | Not Hispanic |

|     |             |        |               |          |         |              |
|-----|-------------|--------|---------------|----------|---------|--------------|
| 136 | Admission 1 | Male   | Blue Cross    | COMM     | Other   | Unknown      |
| 137 | Admission 1 | Male   | Medicare      | MEDICARE | White   | Not Hispanic |
| 138 | Admission 1 | Male   | Blue Cross p  | COMM     | Black   | Not Hispanic |
| 139 | Admission 1 | Male   | Blue Cross    | COMM     | Black   | Not Hispanic |
| 140 | Admission 1 | Female | Emergency N   | MEDICAID | Unknown | Hispanic     |
| 141 | Admission 1 | Male   | Oxford Healt  | COMM     | White   | Not Hispanic |
| 142 | Admission 1 | Female | Archcare Adv  | MEDICARE | White   | Not Hispanic |
| 143 | Admission 1 | Female | Medicare      | MEDICARE | White   | Not Hispanic |
| 144 | Admission 1 | Female | Oxford Healt  | COMM     | Asian   | Not Hispanic |
| 145 | Admission 1 | Female | Blue Cross PI | COMM     | Unknown | Unknown      |
| 146 | Admission 1 | Male   | Emergency N   | MEDICAID | Unknown | Hispanic     |
| 147 | Admission 1 | Female | United Healt  | MEDICARE | White   | Not Hispanic |
| 148 | Admission 1 | Female | Medicare      | MEDICARE | White   | Unknown      |
| 149 | Admission 1 | Male   | Medicare      | MEDICARE | White   | Not Hispanic |
| 150 | Admission 1 | Female | Blue Cross W  | COMM     | Black   | Not Hispanic |
| 151 | Admission 1 | Male   | Emergency N   | MEDICAID | White   | Hispanic     |
| 152 | Admission 1 | Male   | Blue Cross P  | COMM     | White   | Not Hispanic |
| 153 | Admission 1 | Female | Aetna Medic   | MEDICARE | Unknown | Unknown      |
| 154 | Admission 1 | Male   | Oxford Healt  | COMM     | White   | Not Hispanic |
| 155 | Admission 1 | Male   | United Healt  | MEDICARE | White   | Hispanic     |
| 156 | Admission 1 | Female | Oxford Healt  | COMM     | Asian   | Not Hispanic |
| 157 | Admission 1 | Male   | Medicare      | MEDICARE | Black   | Not Hispanic |
| 158 | Admission 1 | Male   | Medicare      | MEDICARE | White   | Not Hispanic |
| 159 | Admission 1 | Male   | Medicare      | MEDICARE | White   | Not Hispanic |
| 160 | Admission 1 | Male   | Blue Cross P  | COMM     | White   | Hispanic     |
| 161 | Admission 1 | Female | Blue Cross O  | COMM     | White   | Not Hispanic |
| 162 | Admission 1 | Male   | Medicare      | MEDICARE | White   | Not Hispanic |
| 163 | Admission 1 | Male   | Emergency N   | MEDICAID | Unknown | Not Hispanic |
| 164 | Admission 1 | Male   | Emblem Hip    | COMM     | White   | Not Hispanic |
| 165 | Admission 1 | Female | Archcare Adv  | MEDICARE | White   | Not Hispanic |
| 166 | Admission 1 | Male   | Blue Cross PI | COMM     | White   | Not Hispanic |
| 167 | Admission 1 | Male   | United Healt  | COMM     | White   | Not Hispanic |
| 168 | Admission 1 | Female | Aetna Medic   | MEDICARE | Black   | Not Hispanic |
| 169 | Admission 1 | Female | Aetna Medic   | MEDICARE | White   | Not Hispanic |
| 170 | Admission 1 | Male   | Local 1199    | COMM     | Black   | Not Hispanic |
| 171 | Admission 1 | Female | Medicaid      | MEDICAID | White   | Not Hispanic |
| 172 | Admission 1 | Male   | Blue Cross M  | COMM     | White   | Not Hispanic |
| 173 | Admission 1 | Male   | Medicare      | MEDICARE | White   | Not Hispanic |
| 174 | Admission 1 | Female | Blue Cross W  | COMM     | White   | Not Hispanic |
| 175 | Admission 2 | Female | Blue Cross W  | COMM     | NA      | NA           |
| 176 | Admission 1 | Male   | Emergency N   | MEDICAID | Unknown | Hispanic     |
| 177 | Admission 1 | Female | Mohawk Val    | MEDICAID | Unknown | Hispanic     |
| 178 | Admission 1 | Female | Emblem HIP    | COMM     | White   | Not Hispanic |
| 179 | Admission 1 | Male   | United Healt  | MEDICARE | White   | Not Hispanic |
| 180 | Admission 1 | Male   | Blue Cross M  | COMM     | White   | Not Hispanic |

|     |             |        |               |          |         |              |
|-----|-------------|--------|---------------|----------|---------|--------------|
| 181 | Admission 1 | Female | Medicare      | MEDICARE | Other   | Hispanic     |
| 182 | Admission 2 | Female | Medicare      | MEDICARE | NA      | NA           |
| 183 | Admission 1 | Female | Medicaid      | MEDICAID | White   | Hispanic     |
| 184 | Admission 2 | Female | Medicaid      | MEDICAID | NA      | NA           |
| 185 | Admission 3 | Female | Medicaid      | MEDICAID | NA      | NA           |
| 186 | Admission 1 | Male   | Blue Cross PI | COMM     | White   | Hispanic     |
| 187 | Admission 1 | Male   | CIGNA HEAL    | COMM     | Black   | Not Hispanic |
| 188 | Admission 1 | Male   | Medicare      | MEDICARE | White   | Not Hispanic |
| 189 | Admission 1 | Female | AETNA MCR     | MEDICARE | White   | Not Hispanic |
| 190 | Admission 1 | Male   | Blue Cross P  | COMM     | White   | Hispanic     |
| 191 | Admission 1 | Male   | Medicare      | MEDICARE | Black   | Not Hispanic |
| 192 | Admission 1 | Male   | United Healt  | COMM     | Asian   | Not Hispanic |
| 193 | Admission 1 | Male   | Medicaid      | MEDICAID | Black   | Not Hispanic |
| 194 | Admission 1 | Male   | Medicaid      | MEDICAID | White   | Hispanic     |
| 195 | Admission 1 | Male   | Centerlight   | MEDICARE | Asian   | Unknown      |
| 196 | Admission 1 | Male   | Emergency M   | MEDICAID | Unknown | Unknown      |
| 197 | Admission 1 | Male   | Medicare      | MEDICARE | Asian   | Not Hispanic |
| 198 | Admission 1 | Male   | Medicaid      | MEDICAID | White   | Not Hispanic |
| 199 | Admission 1 | Male   | Medicare      | MEDICARE | White   | Not Hispanic |
| 200 | Admission 1 | Male   | Fidel Essenti | MEDICAID | White   | Not Hispanic |
| 201 | Admission 1 | Male   | Blue Cross E  | MEDICAID | White   | Not Hispanic |
| 202 | Admission 1 | Male   | PMA           | COMM     | White   | Not Hispanic |
| 203 | Admission 2 | Male   | PMA           | COMM     | NA      | NA           |
| 204 | Admission 1 | Female | Medicare      | MEDICARE | White   | Not Hispanic |
| 205 | Admission 1 | Female | Blue Cross M  | MEDICARE | Black   | Not Hispanic |
| 206 | Admission 1 | Female | Blue Cross PI | COMM     | Black   | Not Hispanic |
| 207 | Admission 1 | Male   | Medicare      | MEDICARE | Black   | Not Hispanic |
| 208 | Admission 1 | Female | Oscar Exchar  | MEDICAID | Black   | Not Hispanic |
| 209 | Admission 1 | Female | Emblem Hea    | MEDICAID | White   | Unknown      |
| 210 | Admission 1 | Male   | Medicare      | MEDICARE | White   | Not Hispanic |
| 211 | Admission 1 | Female | Aetna Medic   | MEDICARE | Black   | Not Hispanic |
| 212 | Admission 1 | Female | Aetna Medic   | MEDICARE | Black   | Not Hispanic |
| 213 | Admission 1 | Male   | Aetna POS     | COMM     | Black   | Not Hispanic |
| 214 | Admission 1 | Male   | Medicare      | MEDICARE | Black   | Not Hispanic |
| 215 | Admission 1 | Female | Mediicare     | MEDICARE | White   | Not Hispanic |
| 216 | Admission 1 | Male   | Medicare      | MEDICARE | White   | Not Hispanic |
| 217 | Admission 1 | Female | HIP Medicare  | MEDICARE | NA      | Not Hispanic |
| 218 | Admission 1 | Female | Emblem GHI    | COMM     | Black   | Not Hispanic |
| 219 | Admission 1 | Female | Medicare      | MEDICARE | White   | Not Hispanic |
| 220 | Admission 1 | Male   | Blue Cross PI | COMM     | White   | Not Hispanic |
| 221 | Admission 1 | Male   | Blue Cross o  | COMM     | Unknown | Not Hispanic |
| 222 | Admission 1 | Male   | Aetna Pos     | COMM     | White   | Hispanic     |
| 223 | Admission 1 | Female | Medicare      | MEDICARE | White   | Not Hispanic |
| 224 | Admission 1 | Male   | medicaid      | MEDICAID | White   | Not Hispanic |
| 225 | Admission 1 | Male   | medicare      | MEDICARE | White   | Not Hispanic |

|     |             |        |               |          |         |              |
|-----|-------------|--------|---------------|----------|---------|--------------|
| 226 | Admission 1 | Female | medicare      | MEDICARE | White   | Not Hispanic |
| 227 | Admission 1 | Male   | Blue Cross    | COMM     | White   | Not Hispanic |
| 228 | Admission 1 | Male   | Blue Cross    | COMM     | White   | Not Hispanic |
| 229 | Admission 1 | Male   | Medicare      | MEDICARE | White   | Not Hispanic |
| 230 | Admission 1 | Male   | medicare      | MEDICARE | White   | Not Hispanic |
| 231 | Admission 2 | Male   | medicare      | MEDICARE | NA      | NA           |
| 232 | Admission 1 | Male   | medicare      | MEDICARE | White   | Not Hispanic |
| 233 | Admission 1 | Male   | Emblem HIP    | COMM     | Black   | Not Hispanic |
| 234 | Admission 1 | Female | Blue cross pr | COMM     | Black   | Not Hispanic |
| 235 | Admission 1 | Female | Elderplan     | MEDICARE | Unknown | Unknown      |
| 236 | Admission 2 | Female | Elderplan     | MEDICARE | NA      | NA           |
| 237 | Admission 1 | Male   | United Healt  | COMM     | Unknown | Not Hispanic |
| 238 | Admission 1 | Female | Medicaid      | MEDICAID | Unknown | Hispanic     |
| 239 | Admission 1 | Male   | Blue Cross In | COMM     | White   | Not Hispanic |
| 240 | Admission 1 | Male   | medicare      | MEDICARE | White   | Not Hispanic |
| 241 | Admission 1 | Male   | United health | COMM     | White   | Not Hispanic |
| 242 | Admission 1 | Male   | Medicare      | MEDICARE | White   | Not Hispanic |
| 243 | Admission 1 | Female | Medicare      | MEDICARE | White   | Not Hispanic |
| 244 | Admission 1 | Male   | medicare      | MEDICARE | White   | Not Hispanic |
| 245 | Admission 1 | Male   | Medicare      | MEDICARE | White   | Not Hispanic |
| 246 | Admission 1 | Male   | Medicare      | MEDICARE | Black   | Not Hispanic |
| 247 | Admission 1 | Female | Medicare      | MEDICARE | White   | Not Hispanic |
| 248 | Admission 2 | Female | Medicare      | MEDICARE | NA      | NA           |
| 249 | Admission 1 | Female | Medicare      | MEDICARE | White   | Not Hispanic |
| 250 | Admission 1 | Female | Aetna PPO     | COMM     | Black   | Not Hispanic |
| 251 | Admission 1 | Male   | Aetna Medic   | MEDICARE | White   | Not Hispanic |
| 252 | Admission 1 | Male   | Medicare      | MEDICARE | Black   | Not Hispanic |
| 253 | Admission 1 | Male   | Medicare      | MEDICARE | Other   | Hispanic     |
| 254 | Admission 1 | Female | Medicare      | MEDICARE | Black   | Not Hispanic |
| 255 | Admission 2 | Female | Medicare      | MEDICARE | NA      | NA           |
| 256 | Admission 1 | Male   | United Healt  | COMM     | Unknown | Unknown      |
| 257 | Admission 1 | Female | United Healt  | MEDICARE | Black   | Not Hispanic |
| 258 | Admission 1 | Female | Medicare      | MEDICARE | White   | Not Hispanic |
| 259 | Admission 1 | Female | medicare      | MEDICARE | White   | Not Hispanic |
| 260 | Admission 1 | Male   | Medicare      | MEDICARE | White   | Not Hispanic |
| 261 | Admission 1 | Female | Medicare      | MEDICARE | White   | Hispanic     |
| 262 | Admission 1 | Female | Cigna Health  | COMM     | Black   | Not Hispanic |
| 263 | Admission 1 | Female | Medicare      | MEDICARE | White   | Not Hispanic |
| 264 | Admission 1 | Female | Medicaid      | MEDICAID | Unknown | Unknown      |
| 265 | Admission 1 | Male   | Medicare      | MEDICARE | Unknown | Not Hispanic |
| 266 | Admission 2 | Male   | Medicare      | MEDICARE | NA      | NA           |
| 267 | Admission 1 | Female | Medicare      | MEDICARE | White   | Hispanic     |
| 268 | Admission 1 | Male   | Aetna         | COMM     | White   | Not Hispanic |
| 269 | Admission 1 | Male   |               | 0 SP     | White   | Not Hispanic |
| 270 | Admission 1 | Female | Aetna Medic   | MEDICARE | Other   | Hispanic     |

|     |             |        |               |          |         |              |
|-----|-------------|--------|---------------|----------|---------|--------------|
| 271 | Admission 1 | Female | Medicaid      | MEDICAID | White   | Hispanic     |
| 272 | Admission 1 | Male   | Medicaid      | MEDICAID | White   | Not Hispanic |
| 273 | Admission 1 | Male   | Medicare      | MEDICARE | White   | Not Hispanic |
| 274 | Admission 1 | Female | umr.pomco     | COMM     | Unknown | Hispanic     |
| 275 | Admission 1 | Female | medicare      | MEDICARE | White   | Not Hispanic |
| 276 | Admission 1 | Female | medicaid      | MEDICAID | White   | Not Hispanic |
| 277 | Admission 1 | Male   | Blue cross    | COMM     | White   | Not Hispanic |
| 278 | Admission 1 | Female | hip medicare  | MEDICARE | Black   | Not Hispanic |
| 279 | Admission 1 | Male   | Aetna POS     | COMM     | Asian   | Not Hispanic |
| 280 | Admission 1 | Male   | medicare      | MEDICARE | Black   | Not Hispanic |
| 281 | Admission 2 | Male   | medicare      | MEDICARE | NA      | NA           |
| 282 | Admission 1 | Female | medicare      | MEDICARE | White   | Not Hispanic |
| 283 | Admission 1 | Male   | Blue Cross of | COMM     | Unknown | Hispanic     |
| 284 | Admission 1 | Male   |               | 0 SP     | Unknown | Not Hispanic |
| 285 | Admission 1 | Female | Blue Cross of | COMM     | Other   | Hispanic     |
| 286 | Admission 1 | Male   | Aetna Medic   | MEDICARE | Other   | Hispanic     |
| 287 | Admission 1 | Female | Affinity Esse | MEDICAID | White   | Not Hispanic |
| 288 | Admission 1 | Male   | Blue Cross of | COMM     | White   | Not Hispanic |
| 289 | Admission 1 | Female | medicare      | MEDICARE | White   | Not Hispanic |
| 290 | Admission 1 | Female | United Healt  | COMM     | White   | Not Hispanic |
| 291 | Admission 1 | Male   | Cigna health  | COMM     | White   | Not Hispanic |
| 292 | Admission 1 | Male   | Emergency M   | MEDICAID | Unknown | Hispanic     |
| 293 | Admission 1 | Male   |               | 0 SP     | NA      | Hispanic     |
| 294 | Admission 1 | Female | Emergency M   | MEDICAID | Unknown | Hispanic     |
| 295 | Admission 1 | Female | hip medicare  | MEDICARE | White   | Not Hispanic |
| 296 | Admission 1 | Female | HIP Medicare  | MEDICARE | Asian   | Not Hispanic |
| 297 | Admission 1 | Female | medicare      | MEDICARE | White   | Not Hispanic |
| 298 | Admission 1 | Male   | medicare      | MEDICARE | White   | Not Hispanic |
| 299 | Admission 1 | Female | Healthfirst M | MEDICARE | White   | Not Hispanic |
| 300 | Admission 1 | Male   | Medicare      | MEDICARE | Other   | Hispanic     |
| 301 | Admission 1 | Male   |               | 0 SP     | White   | Not Hispanic |
| 302 | Admission 1 | Male   | medicaid      | MEDICAID | Black   | Not Hispanic |
| 303 | Admission 1 | Male   | medicare      | MEDICARE | Unknown | Not Hispanic |
| 304 | Admission 1 | Male   | Blue Cross PI | COMM     | Black   | Not Hispanic |
| 305 | Admission 1 | Male   | medicare      | MEDICARE | White   | Not Hispanic |
| 306 | Admission 1 | Female | Medicare      | MEDICARE | White   | Not Hispanic |
| 307 | Admission 1 | Male   | Blue cross pr | COMM     | Unknown | Unknown      |
| 308 | Admission 1 | Female | Medicare      | MEDICARE | White   | Not Hispanic |
| 309 | Admission 1 | Female | HIP HMO       | COMM     | Black   | Not Hispanic |
| 310 | Admission 1 | Female | Blue cross m  | COMM     | Black   | Not Hispanic |
| 311 | Admission 1 | Male   | COVID19HRS    | SP       | Black   | Not Hispanic |
| 312 | Admission 1 | Male   | Medicare      | MEDICARE | White   | Not Hispanic |
| 313 | Admission 1 | Male   | Aetna Medic   | MEDICARE | White   | Unknown      |
| 314 | Admission 1 | Female | Blue Cross PI | COMM     | Other   | Hispanic     |
| 315 | Admission 1 | Male   | Medicaid      | MEDICAID | White   | Not Hispanic |

|     |             |        |               |          |         |              |
|-----|-------------|--------|---------------|----------|---------|--------------|
| 316 | Admission 1 | Male   | Emergency N   | MEDICAID | Unknown | Hispanic     |
| 317 | Admission 1 | Male   | Medicare      | MEDICARE | White   | Not Hispanic |
| 318 | Admission 1 | Female | Medicare      | MEDICARE | Unknown | Hispanic     |
| 319 | Admission 1 | Male   | Local 1199    | COMM     | Black   | Not Hispanic |
| 320 | Admission 1 | Male   | Cigna Health  | COMM     | White   | Not Hispanic |
| 321 | Admission 1 | Male   | Medicare      | MEDICARE | White   | Not Hispanic |
| 322 | Admission 1 | Female | Blue cross PF | COMM     | White   | Not Hispanic |
| 323 | Admission 1 | Male   | Mohawk Vall   | MEDICAID | White   | Not Hispanic |
| 324 | Admission 1 | Female | Affinity Heal | MEDICAID | Unknown | Hispanic     |
| 325 | Admission 1 | Female | medicare      | MEDICARE | White   | Not Hispanic |
| 326 | Admission 1 | Male   | Blue Cross IN | COMM     | Black   | Not Hispanic |
| 327 | Admission 1 | Male   | United Healt  | MEDICARE | White   | Not Hispanic |
| 328 | Admission 1 | Female | medicare      | MEDICARE | White   | Not Hispanic |
| 329 | Admission 1 | Male   | medicare      | MEDICARE | White   | Not Hispanic |
| 330 | Admission 1 | Male   | United Healt  | COMM     | White   | Not Hispanic |
| 331 | Admission 1 | Female | Medicare      | MEDICARE | White   | Not Hispanic |
| 332 | Admission 1 | Male   | Cigna         | COMM     | White   | Not Hispanic |
| 333 | Admission 2 | Male   | Cigna         | COMM     | NA      | NA           |
| 334 | Admission 1 | Female | MCR           | MEDICARE | White   | Not Hispanic |
| 335 | Admission 1 | Male   | MCR           | MEDICARE | White   | Not Hispanic |
| 336 | Admission 1 | Female | HIP MCR       | MEDICARE | Unknown | Hispanic     |
| 337 | Admission 1 | Female | MCR           | MEDICARE | White   | Not Hispanic |
| 338 | Admission 1 | Female | MCR           | MEDICARE | White   | Not Hispanic |
| 339 | Admission 1 | Male   | Better Health | MEDICAID | White   | Not Hispanic |
| 340 | Admission 1 | Male   | UH MCR        | MEDICARE | White   | Unknown      |
| 341 | Admission 1 | Male   | MCR           | MEDICARE | White   | Not Hispanic |
| 342 | Admission 1 | Male   | MCR           | MEDICARE | White   | Not Hispanic |
| 343 | Admission 1 | Female | Local 1199    | COMM     | Black   | Not Hispanic |
| 344 | Admission 1 | Female | MCR           | MEDICARE | White   | Not Hispanic |
| 345 | Admission 1 | Male   | Emergency N   | MEDICAID | Unknown | Hispanic     |
| 346 | Admission 1 | Female | Emergency N   | MEDICAID | White   | Hispanic     |
| 347 | Admission 1 | Male   | Better Health | MEDICAID | Other   | Unknown      |
| 348 | Admission 1 | Female | Mohawk Vall   | MEDICAID | White   | Not Hispanic |
| 349 | Admission 1 | Female | BC out of sta | COMM     | White   | Not Hispanic |
| 350 | Admission 1 | Female | Aetna MCR     | MEDICARE | White   | Not Hispanic |
| 351 | Admission 1 | Male   | BC Ind        | COMM     | White   | Not Hispanic |
| 352 | Admission 1 | Male   | Mohawk Vall   | COMM     | White   | Not Hispanic |
| 353 | Admission 1 | Male   | Aetna MCR     | MEDICARE | Black   | Not Hispanic |
| 354 | Admission 1 | Male   | MCR           | MEDICARE | White   | Not Hispanic |
| 355 | Admission 1 | Female | MCR           | MEDICARE | White   | Not Hispanic |
| 356 | Admission 1 | Male   | Aetna pos     | COMM     | Black   | Not Hispanic |
| 357 | Admission 1 | Male   | Aetna MCR     | MEDICARE | Black   | Not Hispanic |
| 358 | Admission 1 | Male   | Fidilis       | MEDICAID | Black   | Not Hispanic |
| 359 | Admission 1 | Female | MCR           | MEDICARE | White   | Not Hispanic |
| 360 | Admission 1 | Male   | Affinity Heal | MEDICAID | White   | Not Hispanic |



|     |             |        |               |          |         |              |
|-----|-------------|--------|---------------|----------|---------|--------------|
| 361 | Admission 1 | Female | MCR           | MEDICARE | White   | Not Hispanic |
| 362 | Admission 1 | Female | UHC MCR       | MEDICARE | White   | Not Hispanic |
| 363 | Admission 1 | Female | MCR           | MEDICARE | White   | Not Hispanic |
| 364 | Admission 1 | Female | MCR           | MEDICARE | White   | Not Hispanic |
| 365 | Admission 1 | Female | BC MCR        | MEDICARE | White   | Not Hispanic |
| 366 | Admission 1 | Female | Healthfirst M | MEDICARE | Black   | Not Hispanic |
| 367 | Admission 2 | Female | Healthfirst M | MEDICARE | NA      | NA           |
| 368 | Admission 1 | Female | MCR           | MEDICARE | Unknown | Unknown      |
| 369 | Admission 1 | Male   | Aetna HMO     | COMM     | White   | Not Hispanic |
| 370 | Admission 1 | Female | MCR           | MEDICARE | White   | Not Hispanic |
| 371 | Admission 1 | Female | Emblem GHI    | COMM     | Black   | Not Hispanic |
| 372 | Admission 1 | Female | MCR           | MEDICARE | White   | Not Hispanic |
| 373 | Admission 1 | Female | Emblem Hea    | COMM     | White   | Not Hispanic |
| 374 | Admission 1 | Male   | MCR           | MEDICARE | White   | Hispanic     |
| 375 | Admission 1 | Female | MCR           | MEDICARE | White   | Hispanic     |
| 376 | Admission 1 | Male   | MCD           | MEDICAID | White   | Hispanic     |
| 377 | Admission 1 | Female | Mohawk Vall   | MEDICAID | White   | Hispanic     |
| 378 | Admission 1 | Male   | emergency M   | MEDICAID | Other   | Hispanic     |
| 379 | Admission 1 | Female | Local 1199    | COMM     | Unknown | Hispanic     |
| 380 | Admission 1 | Female | MCR           | MEDICARE | White   | Not Hispanic |
| 381 | Admission 1 | Male   | Aetna pos     | COMM     | Black   | Not Hispanic |
| 382 | Admission 1 | Male   | MCR           | MEDICARE | Black   | Not Hispanic |
| 383 | Admission 1 | Female | HIP MCR       | MEDICARE | Black   | Not Hispanic |
| 384 | Admission 2 | Female | HIP MCR       | MEDICARE | NA      | NA           |
| 385 | Admission 1 | Female | Cigna health  | COMM     | Black   | Not Hispanic |
| 386 | Admission 1 | Female | MCR           | MEDICARE | Black   | Not Hispanic |
| 387 | Admission 1 | Male   | Better Health | MEDICAID | White   | Not Hispanic |
| 388 | Admission 1 | Male   | MCR           | MEDICARE | White   | Not Hispanic |
| 389 | Admission 1 | Male   | BC Ind        | COMM     | White   | Not Hispanic |
| 390 | Admission 1 | Female | EmblemGhi     | COMM     | White   | Not Hispanic |
| 391 | Admission 1 | Female | BC Pos        | COMM     | White   | Not Hispanic |
| 392 | Admission 1 | Male   | Oxford Health | COMM     | White   | Not Hispanic |
| 393 | Admission 1 | Male   | Aetna Pos     | COMM     | Unknown | Hispanic     |
| 394 | Admission 1 | Male   | Aetna Mcr     | MEDICARE | White   | Not Hispanic |
| 395 | Admission 1 | Male   | UHC MCR       | MEDICARE | Black   | Not Hispanic |
| 396 | Admission 1 | Male   | MCR           | MEDICARE | White   | Not Hispanic |
| 397 | Admission 1 | Female | MCR           | MEDICARE | White   | Not Hispanic |
| 398 | Admission 2 | Female | MCR           | MEDICARE | NA      | NA           |
| 399 | Admission 1 | Male   | BC            | COMM     | White   | Not Hispanic |
| 400 | Admission 1 | Male   | UHC           | COMM     | White   | Unknown      |
| 401 | Admission 1 | Male   | Oxford HMO    | COMM     | White   | Not Hispanic |
| 402 | Admission 1 | Male   | MCR           | MEDICARE | White   | Not Hispanic |
| 403 | Admission 1 | Female | BC            | COMM     | White   | Not Hispanic |
| 404 | Admission 1 | Male   | MCR           | MEDICARE | White   | Not Hispanic |
| 405 | Admission 1 | Male   | MCR           | MEDICARE | White   | Not Hispanic |

|     |             |        |                |           |         |              |
|-----|-------------|--------|----------------|-----------|---------|--------------|
| 406 | Admission 1 | Female | Mohawl Vall    | MEDICAID  | Unknown | Hispanic     |
| 407 | Admission 1 | Female | MCD            | MEDICAID  | White   | Hispanic     |
| 408 | Admission 1 | Female | MVP Essenti    | MEDICAID  | Unknown | Hispanic     |
| 409 | Admission 2 | Female | MVP Essenti    | MEDICAID  | NA      | NA           |
| 410 | Admission 1 | Male   | local1199      | COMM      | Unknown | Unknown      |
| 411 | Admission 1 | Male   | BC             | COMM      | Unknown | Hispanic     |
| 412 | Admission 1 | Female |                | 1199 COMM | Black   | Not Hispanic |
| 413 | Admission 1 | Female | Cigna          | COMM      | Unknown | Not Hispanic |
| 414 | Admission 1 | Male   |                | 1199 COMM | Unknown | Hispanic     |
| 415 | Admission 1 | Male   | Oxford Healt   | COMM      | Unknown | Hispanic     |
| 416 | Admission 1 | Male   | MCR            | MEDICARE  | White   | Hispanic     |
| 417 | Admission 1 | Female | Local 1199-N   | COMM      | Unknown | Hispanic     |
| 418 | Admission 1 | Male   | MCR            | MEDICARE  | White   | Not Hispanic |
| 419 | Admission 1 | Male   | MCR            | MEDICARE  | Unknown | Hispanic     |
| 420 | Admission 1 | Male   | Blue Cross In  | COMM      | Unknown | Unknown      |
| 421 | Admission 1 | Male   | Health First I | MEDICAID  | White   | Not Hispanic |
| 422 | Admission 2 | Male   | Health First I | MEDICAID  | NA      | NA           |
| 423 | Admission 1 | Male   | HIP MCR        | MEDICARE  | Unknown | Unknown      |
| 424 | Admission 1 | Male   | emergency N    | MEDICAID  | Other   | Hispanic     |
| 425 | Admission 1 | Male   | MCR            | MEDICARE  | White   | Not Hispanic |
| 426 | Admission 1 | Male   | MCR            | MEDICARE  | White   | Not Hispanic |
| 427 | Admission 1 | Female | Local 1199     | COMM      | Black   | Not Hispanic |
| 428 | Admission 1 | Male   | BC PPO         | COMM      | White   | Hispanic     |
| 429 | Admission 1 | Male   | Better Healtl  | MEDICAID  | Black   | Not Hispanic |
| 430 | Admission 1 | Male   | Aetna HMO      | COMM      | White   | Not Hispanic |
| 431 | Admission 1 | Male   | Aetna MCR      | MEDICARE  | White   | Not Hispanic |
| 432 | Admission 1 | Female | Mohawk Vall    | MEDICAID  | Unknown | Not Hispanic |
| 433 | Admission 1 | Female | MCR            | MEDICARE  | Unknown | Unknown      |
| 434 | Admission 1 | Female | Medicare       | MEDICARE  | Black   | Not Hispanic |
| 435 | Admission 1 | Female | Medicare       | MEDICARE  | White   | Not Hispanic |
| 436 | Admission 1 | Male   | Cigna Health   | COMM      | White   | Not Hispanic |
| 437 | Admission 1 | Female | Archcare Adv   | MEDICARE  | White   | Not Hispanic |
| 438 | Admission 1 | Female | MCR            | MEDICARE  | White   | Not Hispanic |
| 439 | Admission 2 | Female | MCR            | MEDICARE  | NA      | NA           |
| 440 | Admission 1 | Female | Medicare       | MEDICARE  | White   | Not Hispanic |
| 441 | Admission 1 | Male   | Blue Cross O   | COMM      | Black   | Not Hispanic |
| 442 | Admission 1 | Male   | Medicaid       | MEDICAID  | White   | Hispanic     |
| 443 | Admission 1 | Male   | Blue Cross P   | COMM      | White   | Hispanic     |
| 444 | Admission 1 | Female | Medicare       | MEDICARE  | White   | Not Hispanic |
| 445 | Admission 1 | Male   | Medicare       | MEDICARE  | White   | Not Hispanic |
| 446 | Admission 1 | Female | Healthfirst N  | MEDICARE  | White   | Unknown      |
| 447 | Admission 1 | Female | Medicre        | MEDICARE  | Black   | Unknown      |
| 448 | Admission 1 | Female | Better Healtl  | MEDICAID  | Other   | Unknown      |
| 449 | Admission 1 | Female | Emblem Hea     | MEDICAID  | White   | Not Hispanic |
| 450 | Admission 1 | Male   | Emergency N    | MEDICAID  | White   | Hispanic     |

|     |             |        |               |          |         |              |
|-----|-------------|--------|---------------|----------|---------|--------------|
| 451 | Admission 1 | Female | Medicaid      | MEDICAID | Other   | Hispanic     |
| 452 | Admission 1 | Male   | Medicare      | MEDICARE | White   | Not Hispanic |
| 453 | Admission 2 | Male   | Medicare      | MEDICARE | NA      | NA           |
| 454 | Admission 1 | Male   | Local-1199    | COMM     | White   | Not Hispanic |
| 455 | Admission 1 | Female | Medicare      | MEDICARE | White   | Not Hispanic |
| 456 | Admission 1 | Female | Cigna Health  | COMM     | Black   | Not Hispanic |
| 457 | Admission 1 | Female | Aetna PPO     | COMM     | Black   | Not Hispanic |
| 458 | Admission 1 | Male   | Medicare      | MEDICARE | White   | Not Hispanic |
| 459 | Admission 1 | Female | Medicare      | MEDICARE | Black   | Not Hispanic |
| 460 | Admission 2 | Female | Medicare      | MEDICARE | NA      | NA           |
| 461 | Admission 1 | Male   | Medicare      | MEDICARE | Black   | Hispanic     |
| 462 | Admission 1 | Male   | HIP Monte     | COMM     | White   | Not Hispanic |
| 463 | Admission 1 | Male   | Aetna PPO     | COMM     | White   | Not Hispanic |
| 464 | Admission 1 | Female | Blue Cross In | COMM     | Black   | Not Hispanic |
| 465 | Admission 1 | Male   | Blue Cross PI | COMM     | Unknown | Unknown      |
| 466 | Admission 1 | Female | Mohawk vall   | MEDICAID | Asian   | Not Hispanic |
| 467 | Admission 1 | Male   | Medicare      | MEDICARE | White   | Not Hispanic |
| 468 | Admission 1 | Male   | Medicare      | MEDICARE | White   | Not Hispanic |
| 469 | Admission 1 | Male   | Blue Cross of | COMM     | White   | Not Hispanic |
| 470 | Admission 1 | Male   | Medicare      | MEDICARE | White   | Not Hispanic |
| 471 | Admission 1 | Female | medicare      | MEDICARE | White   | Not Hispanic |
| 472 | Admission 1 | Male   | Medicare      | MEDICARE | Unknown | Not Hispanic |
| 473 | Admission 1 | Male   | MVP Essenti   | MEDICAID | White   | Hispanic     |
| 474 | Admission 1 | Female | MVP Essenti   | MEDICAID | Other   | Hispanic     |
| 475 | Admission 1 | Male   | Blue Cross P  | COMM     | White   | Hispanic     |
| 476 | Admission 1 | Female | Blue Cross P  | COMM     | White   | Hispanic     |
| 477 | Admission 1 | Male   | Healthfirst M | MEDICARE | White   | Hispanic     |
| 478 | Admission 2 | Male   | Healthfirst M | MEDICARE | NA      | NA           |
| 479 | Admission 1 | Male   | Mohawk Vall   | MEDICAID | White   | Not Hispanic |
| 480 | Admission 1 | Male   | Medicare      | MEDICARE | White   | Not Hispanic |
| 481 | Admission 1 | Male   | Medicare      | MEDICARE | White   | Not Hispanic |
| 482 | Admission 1 | Male   | Medicare      | MEDICARE | White   | Not Hispanic |
| 483 | Admission 1 | Female | Better Healt  | MEDICAID | Black   | Not Hispanic |
| 484 | Admission 1 | Female | United Healt  | COMM     | White   | Not Hispanic |
| 485 | Admission 2 | Female | United Healt  | COMM     | NA      | NA           |
| 486 | Admission 1 | Female | Medicare      | MEDICARE | Black   | Not Hispanic |
| 487 | Admission 1 | Female | Oxford Healt  | COMM     | Unknown | Not Hispanic |
| 488 | Admission 1 | Male   | Oxford Healt  | COMM     | Black   | Not Hispanic |
| 489 | Admission 1 | Female | Aetna Mcr     | MEDICARE | Black   | Unknown      |
| 490 | Admission 1 | Female | CIVID19 HRS   | SP       | Black   | Not Hispanic |
| 491 | Admission 1 | Male   | Medicare      | MEDICARE | White   | Not Hispanic |
| 492 | Admission 1 | Male   | Medicare      | MEDICARE | White   | Not Hispanic |
| 493 | Admission 1 | Male   | Blue Cross M  | MEDICARE | Black   | Not Hispanic |
| 494 | Admission 1 | Female | Fidelis Medic | MEDICARE | Unknown | Hispanic     |
| 495 | Admission 1 | Male   | Medicare      | MEDICARE | White   | Not Hispanic |

|     |             |        |               |          |         |              |
|-----|-------------|--------|---------------|----------|---------|--------------|
| 496 | Admission 1 | Male   | Medicare      | MEDICARE | White   | Not Hispanic |
| 497 | Admission 1 | Female | Aetna Mcr     | MEDICARE | White   | Not Hispanic |
| 498 | Admission 1 | Female | Medicare      | MEDICARE | Black   | Not Hispanic |
| 499 | Admission 1 | Male   | Medicare      | MEDICARE | White   | Not Hispanic |
| 500 | Admission 1 | Male   | Medicare      | MEDICARE | Unknown | Unknown      |
| 501 | Admission 1 | Male   | Medicare      | MEDICARE | Black   | Not Hispanic |
| 502 | Admission 2 | Male   | Medicare      | MEDICARE | NA      | NA           |
| 503 | Admission 3 | Male   | Medicare      | MEDICARE | NA      | NA           |
| 504 | Admission 1 | Male   | Unhc Comm     | MEDICARE | Black   | Not Hispanic |
| 505 | Admission 1 | Female | Medicare      | MEDICARE | White   | Not Hispanic |
| 506 | Admission 1 | Female | Medicare      | MEDICARE | White   | Not Hispanic |
| 507 | Admission 1 | Male   | Medicare      | MEDICARE | Unknown | Unknown      |
| 508 | Admission 2 | Male   | Medicare      | MEDICARE | NA      | NA           |
| 509 | Admission 1 | Male   | Blue Cross Pj | COMM     | Black   | Not Hispanic |
| 510 | Admission 1 | Female | Aetna Mcr     | MEDICARE | Black   | Not Hispanic |
| 511 | Admission 1 | Male   | Blue Cross of | COMM     | Black   | Not Hispanic |
| 512 | Admission 1 | Male   | Medicare      | MEDICARE | Black   | Not Hispanic |
| 513 | Admission 1 | Male   | Medicare      | MEDICARE | Black   | Not Hispanic |
| 514 | Admission 1 | Female | Emblem Hea    | MEDICAID | Black   | Not Hispanic |
| 515 | Admission 1 | Female | Medicare      | MEDICARE | Black   | Not Hispanic |
| 516 | Admission 1 | Female | Medicare      | MEDICARE | White   | Not Hispanic |
| 517 | Admission 1 | Male   | Hip Mcr       | MEDICARE | Black   | Not Hispanic |
| 518 | Admission 1 | Female | Local 1199 N  | COMM     | Black   | Not Hispanic |
| 519 | Admission 1 | Male   | Medicare      | MEDICARE | Black   | Not Hispanic |
| 520 | Admission 1 | Male   | Umr - Unite   | COMM     | Unknown | Not Hispanic |
| 521 | Admission 2 | Male   | Umr - Unite   | COMM     | NA      | NA           |
| 522 | Admission 1 | Female | Blue Cross M  | MEDICARE | White   | Not Hispanic |
| 523 | Admission 1 | Male   | Local 1199 N  | COMM     | Asian   | Not Hispanic |
| 524 | Admission 1 | Female | Medicare      | MEDICARE | White   | Not Hispanic |
| 525 | Admission 1 | Female | United Healt  | MEDICARE | Black   | Not Hispanic |
| 526 | Admission 1 | Male   | Medicare      | MEDICARE | White   | Not Hispanic |
| 527 | Admission 2 | Male   | Medicare      | MEDICARE | NA      | NA           |
| 528 | Admission 1 | Male   | Medicare      | MEDICARE | White   | Not Hispanic |
| 529 | Admission 1 | Female | United Healt  | COMM     | Unknown | Not Hispanic |
| 530 | Admission 1 | Female | United Healt  | MEDICARE | Black   | Not Hispanic |
| 531 | Admission 1 | Female | Medicare      | MEDICARE | Black   | Not Hispanic |
| 532 | Admission 1 | Female | United Healt  | MEDICARE | White   | Not Hispanic |
| 533 | Admission 1 | Female | Blue Cross In | COMM     | Black   | Not Hispanic |
| 534 | Admission 1 | Female | United Healt  | MEDICARE | Black   | Not Hispanic |
| 535 | Admission 1 | Male   | United Healt  | MEDICARE | White   | Not Hispanic |
| 536 | Admission 1 | Female | Medicare      | MEDICARE | Unknown | Unknown      |
| 537 | Admission 1 | Female | HipMcr        | MEDICARE | Black   | Not Hispanic |
| 538 | Admission 1 | Female | Medicare      | MEDICARE | White   | Hispanic     |
| 539 | Admission 1 | Male   | Blue Cross Pj | COMM     | White   | Not Hispanic |
| 540 | Admission 1 | Male   | Medicare      | MEDICARE | White   | Not Hispanic |

|     |             |        |               |          |              |              |
|-----|-------------|--------|---------------|----------|--------------|--------------|
| 541 | Admission 1 | Male   | United Healt  | COMM     | Asian        | Not Hispanic |
| 542 | Admission 1 | Male   | Medicare      | MEDICARE | White        | Not Hispanic |
| 543 | Admission 1 | Male   | Oxford        | COMM     | White        | Not Hispanic |
| 544 | Admission 1 | Male   | Medicare      | MEDICARE | White        | Not Hispanic |
| 545 | Admission 2 | Male   | Medicare      | MEDICARE | NA           | NA           |
| 546 | Admission 1 | Male   | Group Benef   | COMM     | White        | Not Hispanic |
| 547 | Admission 1 | Male   | Aetna Mcr     | MEDICARE | Asian        | Not Hispanic |
| 548 | Admission 1 | Female | United Healt  | MEDICARE | White        | Not Hispanic |
| 549 | Admission 1 | Female | Medicare      | MEDICARE | Black        | Not Hispanic |
| 550 | Admission 1 | Female | Medicare      | MEDICARE | White        | Not Hispanic |
| 551 | Admission 1 | Male   | Medicare      | MEDICARE | Other        | Hispanic     |
| 552 | Admission 1 | Female | HIP MCR       | MEDICARE | White        | Hispanic     |
| 553 | Admission 1 | Female | Medicaid      | MEDICAID | Other        | Unknown      |
| 554 | Admission 1 | Female | Magna Prefe   | COMM     | White        | Not Hispanic |
| 555 | Admission 1 | Male   | B;ue Cross P  | COMM     | American Inc | Not Hispanic |
| 556 | Admission 1 | Male   | Medicare      | MEDICARE | White        | Not Hispanic |
| 557 | Admission 1 | Male   | Medicare      | MEDICARE | White        | Not Hispanic |
| 558 | Admission 1 | Female | Medicare      | MEDICARE | Black        | Not Hispanic |
| 559 | Admission 1 | Female | UMR POMCC     | COMM     | Black        | Not Hispanic |
| 560 | Admission 1 | Female | Blue Cross PI | COMM     | White        | Not Hispanic |
| 561 | Admission 1 | Female | Tricare       | MEDICARE | White        | Not Hispanic |
| 562 | Admission 1 | Male   | Medicare      | MEDICARE | Black        | Not Hispanic |
| 563 | Admission 1 | Female | Better-+ Hez  | MEDICAID | White        | Not Hispanic |
| 564 | Admission 1 | Female | United Healt  | COMM     | Unknown      | Unknown      |
| 565 | Admission 1 | Male   | United Healt  | MEDICARE | Unknown      | Hispanic     |
| 566 | Admission 2 | Male   | United Healt  | MEDICARE | NA           | NA           |
| 567 | Admission 1 | Female | Archcare Adv  | MEDICARE | Asian        | Not Hispanic |
| 568 | Admission 1 | Male   | Blue Cross PI | COMM     | Asian        | Not Hispanic |
| 569 | Admission 1 | Female | Blue Cross O  | COMM     | White        | Not Hispanic |
| 570 | Admission 1 | Male   | Blue Cross Pr | COMM     | Unknown      | Hispanic     |
| 571 | Admission 1 | Female | Emblem Hip    | COMM     | Unknown      | Hispanic     |
| 572 | Admission 1 | Male   | Emergency M   | MEDICAID | Unknown      | Hispanic     |
| 573 | Admission 1 | Female | Cigna Health  | COMM     | White        | Not Hispanic |
| 574 | Admission 1 | Female | Local 1199    | COMM     | Black        | Not Hispanic |
| 575 | Admission 1 | Female | Medicaid      | MEDICAID | White        | Hispanic     |
| 576 | Admission 1 | Female | Blue Cross In | COMM     | White        | Not Hispanic |
| 577 | Admission 1 | Female | Medicare      | MEDICARE | White        | Not Hispanic |
| 578 | Admission 1 | Female | Medicare      | MEDICARE | White        | Not Hispanic |
| 579 | Admission 1 | Female | United Healt  | MEDICARE | White        | Not Hispanic |
| 580 | Admission 2 | Female | United Healt  | MEDICARE | NA           | NA           |
| 581 | Admission 1 | Female | Medicare      | MEDICARE | Black        | Not Hispanic |
| 582 | Admission 2 | Female | Medicare      | MEDICARE | NA           | NA           |
| 583 | Admission 1 | Male   | Healthfirst E | MEDICAID | Unknown      | Not Hispanic |
| 584 | Admission 1 | Female | Medicare      | MEDICARE | Asian        | Not Hispanic |
| 585 | Admission 1 | Male   | Medicare      | MEDICARE | Black        | Not Hispanic |

|     |             |        |               |          |         |              |
|-----|-------------|--------|---------------|----------|---------|--------------|
| 586 | Admission 1 | Male   | medicare      | MEDICARE | Black   | Not Hispanic |
| 587 | Admission 1 | Female | Blue Cross O  | COMM     | Black   | Not Hispanic |
| 588 | Admission 1 | Female | Archcare Adv  | MEDICARE | White   | Not Hispanic |
| 589 | Admission 1 | Female | Local 1199 n  | COMM     | White   | Not Hispanic |
| 590 | Admission 1 | Male   | Aetna Mcr     | MEDICARE | Unknown | Not Hispanic |
| 591 | Admission 1 | Female | Medicare      | MEDICARE | Unknown | Unknown      |
| 592 | Admission 1 | Male   | United Healt  | MEDICARE | White   | Not Hispanic |
| 593 | Admission 1 | Male   | Medicare      | MEDICARE | White   | Not Hispanic |
| 594 | Admission 1 | Male   | Medicare      | MEDICARE | White   | Not Hispanic |
| 595 | Admission 1 | Male   | Medicare      | MEDICARE | Unknown | Unknown      |
| 596 | Admission 1 | Female | Medicaid      | MEDICAID | White   | Unknown      |
| 597 | Admission 1 | Female | medicare      | MEDICARE | White   | Not Hispanic |
| 598 | Admission 1 | Male   | Healthfirst M | MEDICARE | White   | Hispanic     |
| 599 | Admission 1 | Female | Emergency M   | MEDICAID | Unknown | Hispanic     |
| 600 | Admission 1 | Female | Medicare      | MEDICARE | White   | Not Hispanic |
| 601 | Admission 1 | Male   | Aetna Pos     | COMM     | White   | Not Hispanic |
| 602 | Admission 1 | Female | Medicare      | MEDICARE | White   | Not Hispanic |
| 603 | Admission 1 | Male   | Medicare      | MEDICARE | White   | Not Hispanic |
| 604 | Admission 1 | Male   | Medicare      | MEDICARE | Black   | Not Hispanic |
| 605 | Admission 1 | Male   | Emergency M   | MEDICAID | White   | Not Hispanic |
| 606 | Admission 1 | Female | Medicare      | MEDICARE | Asian   | Not Hispanic |
| 607 | Admission 1 | Female | Emergency M   | MEDICAID | White   | Hispanic     |
| 608 | Admission 1 | Male   | Blue CrossIn  | COMM     | White   | Not Hispanic |
| 609 | Admission 1 | Male   | Blue Cross N  | MEDICARE | White   | Not Hispanic |
| 610 | Admission 1 | Male   | Oxford        | COMM     | Black   | Not Hispanic |
| 611 | Admission 1 | Male   | Oscar Medic   | MEDICARE | Black   | Unknown      |
| 612 | Admission 1 | Male   | Medicare      | MEDICARE | Black   | Unknown      |
| 613 | Admission 1 | Female | Archcare Adv  | MEDICARE | White   | Not Hispanic |
| 614 | Admission 1 | Female | United Healt  | MEDICARE | White   | Not Hispanic |
| 615 | Admission 1 | Female | Medicare      | MEDICARE | Unknown | Hispanic     |
| 616 | Admission 1 | Female | Medicare-†    | MEDICARE | White   | Not Hispanic |
| 617 | Admission 1 | Female | Medicare-†    | MEDICARE | White   | Not Hispanic |
| 618 | Admission 1 | Male   | Mohawk Vall   | MEDICAID | Unknown | Hispanic     |
| 619 | Admission 1 | Female | Medicare      | MEDICARE | White   | Not Hispanic |
| 620 | Admission 1 | Female | medicaid      | MEDICAID | Unknown | Unknown      |
| 621 | Admission 1 | Female | Aetna POS     | COMM     | Black   | Not Hispanic |
| 622 | Admission 1 | Male   | medicare      | MEDICARE | White   | Unknown      |
| 623 | Admission 1 | Male   | Medicare      | MEDICARE | Other   | Hispanic     |
| 624 | Admission 1 | Female | Better Healt  | MEDICAID | White   | Not Hispanic |
| 625 | Admission 1 | Male   | Blue Cross o  | COMM     | Unknown | Not Hispanic |
| 626 | Admission 1 | Male   | Medicare      | MEDICARE | Unknown | Hispanic     |
| 627 | Admission 1 | Female | Blue Cross N  | MEDICARE | White   | Not Hispanic |
| 628 | Admission 1 | Male   | Medicare      | MEDICARE | White   | Not Hispanic |
| 629 | Admission 1 | Female | Medicare      | MEDICARE | White   | Not Hispanic |
| 630 | Admission 1 | Female | Blue Cross In | COMM     | White   | Not Hispanic |

|     |             |        |               |          |              |              |
|-----|-------------|--------|---------------|----------|--------------|--------------|
| 631 | Admission 1 | Male   | Medicare      | MEDICARE | White        | Not Hispanic |
| 632 | Admission 1 | Female | Medicare      | MEDICARE | White        | Not Hispanic |
| 633 | Admission 1 | Female | Fidelis Medic | MEDICARE | White        | Not Hispanic |
| 634 | Admission 1 | Male   | Medicaid Jza  | SP       | Unknown      | Hispanic     |
| 635 | Admission 1 | Female | Medicare      | MEDICARE | White        | Not Hispanic |
| 636 | Admission 1 | Male   | Aetna Mcr     | MEDICARE | White        | Not Hispanic |
| 637 | Admission 1 | Female | Aetna Pos     | COMM     | White        | Not Hispanic |
| 638 | Admission 1 | Female | Medicare      | MEDICARE | Other        | Hispanic     |
| 639 | Admission 1 | Male   | Better Health | MEDICAID | White        | Not Hispanic |
| 640 | Admission 1 | Male   | Medicare      | MEDICARE | White        | Not Hispanic |
| 641 | Admission 1 | Male   | Local 1199 N  | COMM     | Black        | Not Hispanic |
| 642 | Admission 1 | Female | Mohawk Vall   | MEDICAID | White        | Hispanic     |
| 643 | Admission 1 | Male   | Medicaid      | MEDICAID | Unknown      | Not Hispanic |
| 644 | Admission 2 | Male   | Medicaid      | MEDICAID | NA           | NA           |
| 645 | Admission 1 | Male   | Medicare      | MEDICARE | White        | Not Hispanic |
| 646 | Admission 1 | Female | Medicare      | MEDICARE | White        | Not Hispanic |
| 647 | Admission 1 | Male   | Medicare      | MEDICARE | White        | Not Hispanic |
| 648 | Admission 1 | Female | Medicare      | MEDICARE | White        | Not Hispanic |
| 649 | Admission 1 | Male   | Medicare      | MEDICARE | White        | Not Hispanic |
| 650 | Admission 1 | Female | Blue Cross O  | COMM     | White        | Not Hispanic |
| 651 | Admission 1 | Female | Medicare      | MEDICARE | Black        | Not Hispanic |
| 652 | Admission 1 | Male   | United Health | COMM     | White        | Not Hispanic |
| 653 | Admission 1 | Female | Medicare      | MEDICARE | Black        | Not Hispanic |
| 654 | Admission 1 | Female | United Health | MEDICARE | White        | Not Hispanic |
| 655 | Admission 1 | Male   | Medicare      | MEDICARE | Black        | Not Hispanic |
| 656 | Admission 1 | Male   | Blue Cross In | COMM     | Black        | Not Hispanic |
| 657 | Admission 1 | Male   | Medicare      | MEDICARE | Black        | Not Hispanic |
| 658 | Admission 1 | Female | Medicare      | MEDICARE | Black        | Not Hispanic |
| 659 | Admission 1 | Male   | Medicare      | MEDICARE | Black        | Not Hispanic |
| 660 | Admission 1 | Male   | Medicare      | MEDICARE | White        | Not Hispanic |
| 661 | Admission 2 | Male   | Medicare      | MEDICARE | NA           | NA           |
| 662 | Admission 1 | Male   | Medicare      | MEDICARE | White        | Not Hispanic |
| 663 | Admission 1 | Male   | Hip Medicare  | MEDICARE | Black        | Not Hispanic |
| 664 | Admission 1 | Male   | Medicare      | MEDICARE | American Inc | Not Hispanic |
| 665 | Admission 1 | Female | Medicare      | MEDICARE | Unknown      | Not Hispanic |
| 666 | Admission 1 | Female | Hip HMO       | COMM     | Black        | Not Hispanic |
| 667 | Admission 2 | Female | Hip HMO       | COMM     | NA           | NA           |
| 668 | Admission 1 | Male   | Medicare      | MEDICARE | White        | Not Hispanic |
| 669 | Admission 1 | Male   | Blue Cross PI | COMM     | Black        | Not Hispanic |
| 670 | Admission 1 | Male   | Aetna Pos     | COMM     | White        | Not Hispanic |
| 671 | Admission 1 | Female | Blue Cross P  | COMM     | Unknown      | Hispanic     |
| 672 | Admission 1 | Male   | Wellcare Me   | MEDICARE | Unknown      | Hispanic     |
| 673 | Admission 1 | Male   | United Health | MEDICARE | White        | Not Hispanic |
| 674 | Admission 2 | Male   | United Health | MEDICARE | NA           | NA           |
| 675 | Admission 1 | Male   | Emergencny N  | MEDICAID | Other        | Hispanic     |

|     |             |        |               |          |              |              |
|-----|-------------|--------|---------------|----------|--------------|--------------|
| 676 | Admission 1 | Female | Medicare      | MEDICARE | White        | Not Hispanic |
| 677 | Admission 1 | Female | UMP POMCC     | COMM     | Black        | Not Hispanic |
| 678 | Admission 2 | Female | UMP POMCC     | COMM     | NA           | NA           |
| 679 | Admission 1 | Male   | Medicare      | MEDICARE | White        | Not Hispanic |
| 680 | Admission 1 | Female | Medicare      | MEDICARE | White        | Not Hispanic |
| 681 | Admission 1 | Male   | Medicare      | MEDICARE | White        | Not Hispanic |
| 682 | Admission 1 | Male   | Medicare      | MEDICARE | Unknown      | Hispanic     |
| 683 | Admission 1 | Female | Medicare      | MEDICARE | Unknown      | Hispanic     |
| 684 | Admission 1 | Male   | Hip HMO       | COMM     | White        | Not Hispanic |
| 685 | Admission 1 | Male   | Medicare      | MEDICARE | White        | Not Hispanic |
| 686 | Admission 1 | Male   | Medicare      | MEDICARE | White        | Not Hispanic |
| 687 | Admission 1 | Male   | Aetna Pos     | COMM     | White        | Not Hispanic |
| 688 | Admission 1 | Female | Blue Cross PI | COMM     | White        | Not Hispanic |
| 689 | Admission 1 | Male   | Blue Cross E  | MEDICAID | White        | Not Hispanic |
| 690 | Admission 1 | Male   | Aetna Medic   | MEDICARE | White        | Not Hispanic |
| 691 | Admission 1 | Male   | Medicare      | MEDICARE | White        | Not Hispanic |
| 692 | Admission 1 | Female | Medicare      | MEDICARE | White        | Not Hispanic |
| 693 | Admission 1 | Male   | Healthfirst N | MEDICARE | Asian        | Not Hispanic |
| 694 | Admission 1 | Male   | Blue Cross PI | COMM     | Asian        | Not Hispanic |
| 695 | Admission 1 | Male   | Blue Cross S  | COMM     | White        | Not Hispanic |
| 696 | Admission 1 | Female | Wellcare Mc   | MEDICAID | White        | Hispanic     |
| 697 | Admission 1 | Male   | Medicare      | MEDICARE | White        | Not Hispanic |
| 698 | Admission 1 | Female | Blue Cross S  | COMM     | White        | Not Hispanic |
| 699 | Admission 1 | Male   | Blue Cross S  | COMM     | White        | Not Hispanic |
| 700 | Admission 1 | Male   | United Healt  | MEDICARE | White        | Not Hispanic |
| 701 | Admission 1 | Female | Blue Cross PI | COMM     | Unknown      | Not Hispanic |
| 702 | Admission 1 | Male   | United Healt  | MEDICARE | White        | Unknown      |
| 703 | Admission 1 | Male   | Blue Cross In | COMM     | Unknown      | Not Hispanic |
| 704 | Admission 1 | Female | Medicare      | MEDICARE | White        | Not Hispanic |
| 705 | Admission 1 | Male   | Emergecny N   | MEDICAID | White        | Hispanic     |
| 706 | Admission 1 | Female | United Healt  | MEDICARE | White        | Not Hispanic |
| 707 | Admission 1 | Male   | Medicare      | MEDICARE | Other        | Hispanic     |
| 708 | Admission 1 | Female | Blue Cross O  | COMM     | Unknown      | Hispanic     |
| 709 | Admission 1 | Male   | Healthfirst N | MEDICARE | White        | Hispanic     |
| 710 | Admission 1 | Male   | Blue Cross O  | COMM     | Unknown      | Hispanic     |
| 711 | Admission 1 | Male   | Emergency N   | MEDICAID | White        | Hispanic     |
| 712 | Admission 1 | Male   | Emergency N   | MEDICAID | White        | Hispanic     |
| 713 | Admission 1 | Male   | Emergency N   | MEDICAID | White        | Hispanic     |
| 714 | Admission 1 | Male   | Fiel Essentia | MEDICAID | White        | Hispanic     |
| 715 | Admission 1 | Male   | Emergency N   | MEDICAID | Unknown      | Hispanic     |
| 716 | Admission 1 | Female | Medicare      | MEDICARE | Other        | Hispanic     |
| 717 | Admission 1 | Male   | Emergency N   | MEDICAID | White        | Hispanic     |
| 718 | Admission 1 | Female | Mohawk Vall   | MEDICAID | White        | Hispanic     |
| 719 | Admission 1 | Male   | Hip Medicare  | MEDICARE | White        | Not Hispanic |
| 720 | Admission 1 | Female | Medicare      | MEDICARE | American Inc | Not Hispanic |



|     |             |        |               |          |              |              |
|-----|-------------|--------|---------------|----------|--------------|--------------|
| 721 | Admission 1 | Male   | Hip Medicare  | MEDICARE | Unknown      | Hispanic     |
| 722 | Admission 1 | Male   | Medicare      | MEDICARE | White        | Not Hispanic |
| 723 | Admission 1 | Female | Medicare      | MEDICARE | White        | Not Hispanic |
| 724 | Admission 1 | Male   | Medicare      | MEDICARE | White        | Not Hispanic |
| 725 | Admission 1 | Male   | Metro Plus    | MEDICAID | White        | Hispanic     |
| 726 | Admission 1 | Female | Medicare      | MEDICARE | White        | Not Hispanic |
| 727 | Admission 1 | Male   | United Health | MEDICARE | Unknown      | Hispanic     |
| 728 | Admission 1 | Male   | Metro Plus    | MEDICAID | Unknown      | Hispanic     |
| 729 | Admission 1 | Male   | Emergency N   | MEDICAID | Other        | Hispanic     |
| 730 | Admission 1 | Female | Medicare      | MEDICARE | White        | Not Hispanic |
| 731 | Admission 1 | Male   | Metro Plus    | MEDICAID | American Inc | Not Hispanic |
| 732 | Admission 1 | Male   | Aetna Medic   | MEDICARE | American Inc | Not Hispanic |
| 733 | Admission 2 | Male   | Aetna Medic   | MEDICARE | NA           | NA           |
| 734 | Admission 1 | Female | Emblem Hip    | COMM     | Black        | Not Hispanic |
| 735 | Admission 1 | Male   | Cigna Health  | COMM     | White        | Not Hispanic |
| 736 | Admission 1 | Female | Medicaid      | MEDICAID | Unknown      | Unknown      |
| 737 | Admission 1 | Male   | Medicaid Jza  | SP       | Unknown      | Not Hispanic |
| 738 | Admission 1 | Male   | Medicare      | MEDICARE | White        | Not Hispanic |
| 739 | Admission 1 | Male   | Emergency N   | MEDICAID | Unknown      | Not Hispanic |
| 740 | Admission 1 | Male   | Mvp Essential | MEDICAID | Other        | Not Hispanic |
| 741 | Admission 1 | Female | Oxford Health | COMM     | White        | Not Hispanic |
| 742 | Admission 1 | Female | Blue Cross W  | COMM     | Other        | Hispanic     |
| 743 | Admission 1 | Female | Mohawk Vall   | MEDICAID | White        | Hispanic     |
| 744 | Admission 1 | Male   | Medicaid      | MEDICAID | Black        | Not Hispanic |
| 745 | Admission 1 | Male   | Medicare      | MEDICARE | White        | Not Hispanic |
| 746 | Admission 1 | Male   | United Health | MEDICARE | White        | Hispanic     |
| 747 | Admission 1 | Male   | United Health | MEDICARE | White        | Not Hispanic |
| 748 | Admission 1 | Female | Blue Cross PI | COMM     | Unknown      | Hispanic     |
| 749 | Admission 1 | Female | Medicare      | MEDICARE | Black        | Unknown      |
| 750 | Admission 1 | Female | Blue Cross PI | COMM     | White        | Not Hispanic |
| 751 | Admission 1 | Male   | Medicare      | MEDICARE | White        | Not Hispanic |
| 752 | Admission 1 | Male   | Medicare      | MEDICARE | White        | Not Hispanic |
| 753 | Admission 1 | Female | Mohawk Vall   | MEDICAID | Unknown      | Hispanic     |
| 754 | Admission 1 | Male   | Mohawk Vall   | MEDICAID | Unknown      | Hispanic     |
| 755 | Admission 1 | Male   | Aetna Pos     | COMM     | White        | Not Hispanic |
| 756 | Admission 1 | Male   | Blue Cross N  | MEDICARE | Black        | Not Hispanic |
| 757 | Admission 1 | Female | Emblem Ghi    | COMM     | Black        | Not Hispanic |
| 758 | Admission 1 | Female | Mohawk Vall   | MEDICAID | White        | Not Hispanic |
| 759 | Admission 1 | Male   | Blue Cross H  | COMM     | Black        | Not Hispanic |
| 760 | Admission 1 | Male   | Medicare      | MEDICARE | White        | Not Hispanic |
| 761 | Admission 2 | Male   | Medicare      | MEDICARE | NA           | NA           |
| 762 | Admission 1 | Female | Medicare      | MEDICARE | American Inc | Not Hispanic |
| 763 | Admission 1 | Female | Medicare      | MEDICARE | Black        | Not Hispanic |
| 764 | Admission 1 | Male   | Medicare      | MEDICARE | White        | Not Hispanic |
| 765 | Admission 1 | Female | Medicare      | MEDICARE | White        | Not Hispanic |

|     |             |        |               |          |         |              |
|-----|-------------|--------|---------------|----------|---------|--------------|
| 766 | Admission 1 | Male   | Emblem Hip    | COMM     | White   | Not Hispanic |
| 767 | Admission 1 | Male   | Aetna Medic   | MEDICARE | White   | Not Hispanic |
| 768 | Admission 1 | Female | Blue Cross W  | COMM     | White   | Hispanic     |
| 769 | Admission 1 | Male   | Hip Monte     | COMM     | White   | Not Hispanic |
| 770 | Admission 1 | Female | Healthfirst N | MEDICARE | White   | Hispanic     |
| 771 | Admission 2 | Female | Healthfirst N | MEDICARE | NA      | NA           |
| 772 | Admission 3 | Female | Healthfirst N | MEDICARE | NA      | NA           |
| 773 | Admission 1 | Male   | Oxford Healt  | COMM     | Unknown | Hispanic     |
| 774 | Admission 1 | Male   | COVID19 HR    | SP       | Unknown | Hispanic     |
| 775 | Admission 1 | Male   | Medicare      | MEDICARE | White   | Not Hispanic |
| 776 | Admission 1 | Male   | Aetna Pos     | COMM     | White   | Not Hispanic |
| 777 | Admission 1 | Male   | Emergency M   | MEDICAID | Unknown | Hispanic     |
| 778 | Admission 1 | Female | Metro Plus    | MEDICAID | Black   | Not Hispanic |
| 779 | Admission 1 | Male   | Medicare      | MEDICARE | White   | Not Hispanic |
| 780 | Admission 1 | Male   | Medicare      | MEDICARE | White   | Not Hispanic |
| 781 | Admission 1 | Female | Mvp Essential | MEDICAID | Unknown | Hispanic     |
| 782 | Admission 1 | Female | Oxford Healt  | COMM     | White   | Not Hispanic |
| 783 | Admission 1 | Male   | Blue Cross PI | COMM     | Unknown | Hispanic     |
| 784 | Admission 1 | Female | Medicare      | MEDICARE | White   | Hispanic     |
| 785 | Admission 1 | Male   | Blue Cross In | COMM     | White   | Hispanic     |
| 786 | Admission 1 | Male   | Medicare      | MEDICARE | White   | Not Hispanic |
| 787 | Admission 1 | Male   | Medicare      | MEDICARE | White   | Not Hispanic |
| 788 | Admission 1 | Male   | MVP essenti   | MEDICAID | White   | Hispanic     |
| 789 | Admission 1 | Female | Blue Cross Pr | COMM     | White   | Not Hispanic |
| 790 | Admission 1 | Male   | Local 1199-N  | COMM     | White   | Not Hispanic |
| 791 | Admission 2 | Male   | Local 1199-N  | COMM     | NA      | NA           |
| 792 | Admission 1 | Female | Medicare      | MEDICARE | White   | Not Hispanic |
| 793 | Admission 1 | Female | Affinity Esse | MEDICAID | Black   | Not Hispanic |
| 794 | Admission 1 | Male   | United Healt  | MEDICARE | White   | Not Hispanic |
| 795 | Admission 1 | Male   | Medicaid      | MEDICAID | White   | Not Hispanic |
| 796 | Admission 1 | Female | Medicare      | MEDICARE | White   | Not Hispanic |
| 797 | Admission 1 | Male   | Emergency M   | MEDICAID | Other   | Unknown      |
| 798 | Admission 1 | Male   | Blue Cross M  | MEDICARE | White   | Not Hispanic |
| 799 | Admission 1 | Female | Blue Cross N  | MEDICARE | Other   | Hispanic     |
| 800 | Admission 1 | Female | Medicaid      | MEDICAID | White   | Not Hispanic |
| 801 | Admission 1 | Male   | Mvp Essential | MEDICAID | Other   | Hispanic     |
| 802 | Admission 1 | Male   | Emergency M   | MEDICAID | Unknown | Hispanic     |
| 803 | Admission 1 | Male   | Aetna Pos     | COMM     | White   | Hispanic     |
| 804 | Admission 1 | Female | Mvp Essential | MEDICAID | Unknown | Hispanic     |
| 805 | Admission 1 | Female | Blue Cross PI | COMM     | White   | Not Hispanic |
| 806 | Admission 1 | Female | United Healt  | MEDICARE | White   | Not Hispanic |
| 807 | Admission 1 | Male   | Medicare      | MEDICARE | White   | Not Hispanic |
| 808 | Admission 2 | Male   | Medicare      | MEDICARE | NA      | NA           |
| 809 | Admission 1 | Male   | Emergency M   | MEDICAID | Black   | Hispanic     |
| 810 | Admission 1 | Female | Oxford Healt  | COMM     | White   | Not Hispanic |

|     |             |        |               |          |         |              |
|-----|-------------|--------|---------------|----------|---------|--------------|
| 811 | Admission 1 | Female | Hip HMO       | COMM     | White   | Not Hispanic |
| 812 | Admission 1 | Female | Aetna Pos     | COMM     | Black   | Not Hispanic |
| 813 | Admission 1 | Male   | Healthfirst M | MEDICAID | Black   | Not Hispanic |
| 814 | Admission 1 | Male   | COVID19 HR    | SP       | Unknown | Not Hispanic |
| 815 | Admission 1 | Female | Medicare      | MEDICARE | White   | Not Hispanic |
| 816 | Admission 1 | Male   | Medicare      | MEDICARE | Unknown | Not Hispanic |
| 817 | Admission 1 | Male   | Medicare      | MEDICARE | White   | Not Hispanic |
| 818 | Admission 1 | Female | Affinity Heal | MEDICAID | White   | Hispanic     |
| 819 | Admission 1 | Female | Aetna Medic   | MEDICARE | Unknown | Hispanic     |
| 820 | Admission 1 | Male   | Magna Prefe   | COMM     | White   | Not Hispanic |
| 821 | Admission 1 | Male   | Emergency n   | MEDICAID | Unknown | Hispanic     |
| 822 | Admission 1 | Male   | Oxford Healt  | COMM     | White   | Not Hispanic |
| 823 | Admission 2 | Male   | Oxford Healt  | COMM     | NA      | NA           |
| 824 | Admission 1 | Female | Biberk Insura | COMM     | Black   | Not Hispanic |
| 825 | Admission 1 | Male   | Healthfirst M | MEDICARE | White   | Not Hispanic |
| 826 | Admission 1 | Male   | Blue cross p  | COMM     | White   | Hispanic     |
| 827 | Admission 2 | Male   | Blue cross p  | COMM     | NA      | NA           |
| 828 | Admission 1 | Male   | Medicare      | MEDICARE | White   | Not Hispanic |
| 829 | Admission 1 | Male   | Medicare      | MEDICARE | Black   | Not Hispanic |
| 830 | Admission 1 | Female | Fiel Essentia | MEDICAID | Black   | Not Hispanic |
| 831 | Admission 2 | Female | Fiel Essentia | MEDICAID | NA      | NA           |
| 832 | Admission 1 | Female | Blue Cross PI | COMM     | White   | Unknown      |
| 833 | Admission 1 | Female | Medicare      | MEDICARE | White   | Not Hispanic |
| 834 | Admission 1 | Male   | Medicaid      | MEDICAID | Black   | Not Hispanic |
| 835 | Admission 1 | Female | Blue Cross PI | COMM     | Black   | Not Hispanic |
| 836 | Admission 1 | Female | Medicare      | MEDICARE | White   | Not Hispanic |
| 837 | Admission 1 | Female | Blue Cross M  | MEDICARE | White   | Not Hispanic |
| 838 | Admission 1 | Male   | Blue Cross P  | COMM     | White   | Not Hispanic |
| 839 | Admission 2 | Male   | Blue Cross P  | COMM     | NA      | NA           |
| 840 | Admission 1 | Male   | Aetna Ppo     | COMM     | Black   | Not Hispanic |
| 841 | Admission 2 | Male   | Aetna Ppo     | COMM     | NA      | NA           |
| 842 | Admission 1 | Female | Medicare      | MEDICARE | White   | Not Hispanic |
| 843 | Admission 1 | Male   | Emergency M   | MEDICAID | Unknown | Hispanic     |
| 844 | Admission 1 | Male   | United Healt  | COMM     | White   | Not Hispanic |
| 845 | Admission 1 | Female | Medicare      | MEDICARE | White   | Not Hispanic |
| 846 | Admission 1 | Male   | Aetna Medic   | MEDICARE | White   | Not Hispanic |
| 847 | Admission 1 | Female | Medicare      | MEDICARE | White   | Not Hispanic |
| 848 | Admission 1 | Male   | Medicare      | MEDICARE | White   | Not Hispanic |
| 849 | Admission 1 | Male   | Umr.pomco     | COMM     | Other   | Hispanic     |
| 850 | Admission 1 | Male   | Medicare      | MEDICARE | White   | Hispanic     |
| 851 | Admission 1 | Female | Medicare      | MEDICARE | White   | Not Hispanic |
| 852 | Admission 1 | Male   | Medicare      | MEDICARE | White   | Not Hispanic |
| 853 | Admission 2 | Male   | Medicare      | MEDICARE | NA      | NA           |
| 854 | Admission 1 | Female | Medicare      | MEDICARE | White   | Not Hispanic |
| 855 | Admission 1 | Male   | United Healt  | COMM     | Black   | Unknown      |

|     |             |        |               |          |             |              |
|-----|-------------|--------|---------------|----------|-------------|--------------|
| 856 | Admission 1 | Female | Better Health | MEDICAID | Other       | Hispanic     |
| 857 | Admission 1 | Male   | Emergency M   | MEDICAID | Unknown     | Hispanic     |
| 858 | Admission 1 | Female | Medicare      | MEDICARE | White       | Hispanic     |
| 859 | Admission 1 | Male   | Blue Cross PI | COMM     | White       | Not Hispanic |
| 860 | Admission 1 | Female | United Health | MEDICARE | White       | Not Hispanic |
| 861 | Admission 1 | Male   | Medicare      | MEDICARE | White       | Not Hispanic |
| 862 | Admission 1 | Male   | Hip Medicare  | MEDICARE | Asian       | Not Hispanic |
| 863 | Admission 1 | Female | Healthfirst M | MEDICAID | Other       | Hispanic     |
| 864 | Admission 1 | Male   | Medicare      | MEDICARE | Native Hawa | Hispanic     |
| 865 | Admission 1 | Male   | Medicare      | MEDICARE | White       | Not Hispanic |
| 866 | Admission 1 | Female | Oxford Health | COMM     | White       | Not Hispanic |
| 867 | Admission 1 | Female | Emblem Hea    | COMM     | White       | Not Hispanic |
| 868 | Admission 1 | Male   | Emergency M   | MEDICAID | Other       | Hispanic     |
| 869 | Admission 1 | Male   | Gallagher Ba  | COMM     | White       | Hispanic     |
| 870 | Admission 2 | Male   | Gallagher Ba  | COMM     | NA          | NA           |
| 871 | Admission 1 | Male   | Medicaid      | MEDICAID | White       | Hispanic     |
| 872 | Admission 1 | Male   | Wellcare Me   | MEDICARE | White       | Hispanic     |
| 873 | Admission 1 | Male   | Blue Cross W  | COMM     | White       | Hispanic     |
| 874 | Admission 1 | Male   | Healthfirst M | MEDICAID | Unknown     | Not Hispanic |
| 875 | Admission 1 | Female | United Health | COMM     | Black       | Not Hispanic |
| 876 | Admission 1 | Male   | Oxford Health | COMM     | Other       | Not Hispanic |
| 877 | Admission 1 | Male   | Medicaid      | MEDICAID | White       | Not Hispanic |
| 878 | Admission 1 | Male   | blue cross m  | MEDICARE | Black       | Not Hispanic |
| 879 | Admission 1 | Male   | Medicare      | MEDICARE | White       | Not Hispanic |
| 880 | Admission 1 | Female | Medicare      | MEDICARE | White       | Not Hispanic |
| 881 | Admission 1 | Female | Blue Cross N  | MEDICARE | White       | Not Hispanic |
| 882 | Admission 1 | Male   | Aetna Medic   | MEDICARE | Other       | Hispanic     |
| 883 | Admission 1 | Male   | Medicare      | MEDICARE | White       | Not Hispanic |
| 884 | Admission 1 | Male   | Medicare      | MEDICARE | Unknown     | Hispanic     |
| 885 | Admission 1 | Female | Medicaid      | MEDICAID | Unknown     | Hispanic     |
| 886 | Admission 1 | Male   | Shareplans    | SP       | White       | Unknown      |
| 887 | Admission 1 | Female | Medicare      | MEDICARE | White       | Hispanic     |
| 888 | Admission 1 | Male   | Blue Cross PI | COMM     | White       | Not Hispanic |
| 889 | Admission 1 | Male   | Medicare      | MEDICARE | White       | Not Hispanic |
| 890 | Admission 1 | Male   | Mohawk Val    | MEDICAID | Unknown     | Hispanic     |
| 891 | Admission 1 | Male   | Cigna Health  | COMM     | White       | Not Hispanic |
| 892 | Admission 1 | Female | Medicare      | MEDICARE | Other       | Hispanic     |
| 893 | Admission 1 | Female | Blue Cross PI | COMM     | White       | Not Hispanic |
| 894 | Admission 1 | Male   | Blue Cross W  | COMM     | Black       | Not Hispanic |
| 895 | Admission 1 | Female | Hip Medicare  | MEDICARE | Black       | Not Hispanic |
| 896 | Admission 1 | Female | Aetna Medic   | MEDICARE | Black       | Not Hispanic |
| 897 | Admission 1 | Female | Medicare      | MEDICARE | White       | Not Hispanic |
| 898 | Admission 1 | Male   | Blue Cross PI | COMM     | Black       | Not Hispanic |
| 899 | Admission 1 | Female | Aetna Medic   | MEDICARE | Black       | Not Hispanic |
| 900 | Admission 1 | Female | Medicare      | MEDICARE | Black       | Not Hispanic |

|     |             |        |               |          |         |              |
|-----|-------------|--------|---------------|----------|---------|--------------|
| 901 | Admission 1 | Male   | Medicare      | MEDICARE | Black   | Not Hispanic |
| 902 | Admission 1 | Male   | Medicare      | MEDICARE | White   | Not Hispanic |
| 903 | Admission 1 | Female | Blue Cross PI | COMM     | Black   | Not Hispanic |
| 904 | Admission 1 | Male   | Emergency M   | MEDICAID | Other   | Hispanic     |
| 905 | Admission 1 | Male   | Emergency M   | MEDICAID | White   | Hispanic     |
| 906 | Admission 1 | Male   | Blue Cross O  | COMM     | White   | Unknown      |
| 907 | Admission 1 | Female | Medicare      | MEDICARE | White   | Hispanic     |
| 908 | Admission 1 | Female | Mohawk Vall   | MEDICAID | White   | Hispanic     |
| 909 | Admission 1 | Male   | Mohawk Vall   | MEDICAID | White   | Hispanic     |
| 910 | Admission 2 | Male   | Mohawk Vall   | MEDICAID | NA      | NA           |
| 911 | Admission 1 | Male   | Emergency M   | MEDICAID | Unknown | Hispanic     |
| 912 | Admission 1 | Female | Emblem Hip    | COMM     | Unknown | Hispanic     |
| 913 | Admission 1 | Female | Hip HMO       | COMM     | Black   | Not Hispanic |
| 914 | Admission 1 | Male   | Emergency M   | MEDICAID | White   | Hispanic     |
| 915 | Admission 1 | Male   | Mohawk Vall   | MEDICAID | Other   | Hispanic     |
| 916 | Admission 1 | Male   | Emergency M   | MEDICAID | White   | Hispanic     |
| 917 | Admission 1 | Female | Mohawk Vall   | MEDICAID | White   | Not Hispanic |
| 918 | Admission 1 | Male   | Emergency M   | MEDICAID | Unknown | Hispanic     |
| 919 | Admission 1 | Female | Medicare      | MEDICARE | White   | Not Hispanic |
| 920 | Admission 1 | Male   | United Healt  | COMM     | White   | Not Hispanic |
| 921 | Admission 1 | Male   | Emergency M   | MEDICAID | Unknown | Hispanic     |
| 922 | Admission 1 | Male   | Local 1199    | COMM     | Black   | Not Hispanic |
| 923 | Admission 1 | Male   | Emergency M   | MEDICAID | White   | Hispanic     |
| 924 | Admission 1 | Female | Medicare      | MEDICARE | White   | Hispanic     |
| 925 | Admission 1 | Male   | Fidelis Excha | MEDICAID | White   | Hispanic     |
| 926 | Admission 1 | Male   | Medicare      | MEDICARE | White   | Not Hispanic |
| 927 | Admission 1 | Male   | Medicare      | MEDICARE | White   | Not Hispanic |
| 928 | Admission 1 | Female | Medicare      | MEDICARE | White   | Not Hispanic |
| 929 | Admission 1 | Male   | Medicare      | MEDICARE | White   | Not Hispanic |
| 930 | Admission 1 | Male   | Medicare      | MEDICARE | White   | Not Hispanic |
| 931 | Admission 1 | Male   | Blue Cross PI | COMM     | Other   | Hispanic     |
| 932 | Admission 1 | Male   | Medicare      | MEDICARE | Black   | Not Hispanic |
| 933 | Admission 2 | Male   | Medicare      | MEDICARE | NA      | NA           |
| 934 | Admission 1 | Male   | Local 1199    | COMM     | White   | Hispanic     |
| 935 | Admission 1 | Female | medicaid      | MEDICAID | White   | Hispanic     |
| 936 | Admission 1 | Female | Emergency M   | MEDICAID | White   | Hispanic     |
| 937 | Admission 1 | Male   | Medicare      | MEDICARE | White   | Not Hispanic |
| 938 | Admission 1 | Female | Medicare      | MEDICARE | White   | Not Hispanic |
| 939 | Admission 1 | Male   | Aetna Pos     | COMM     | Other   | Not Hispanic |
| 940 | Admission 1 | Female | Mohawk Vall   | MEDICAID | White   | Hispanic     |
| 941 | Admission 1 | Male   | Medicare      | MEDICARE | White   | Not Hispanic |
| 942 | Admission 1 | Male   | Medicare      | MEDICARE | White   | Not Hispanic |
| 943 | Admission 1 | Female | Medicaid      | MEDICAID | White   | Hispanic     |
| 944 | Admission 1 | Male   | Hip Monte     | COMM     | White   | Not Hispanic |
| 945 | Admission 1 | Male   | Aetna Pos     | COMM     | Unknown | Hispanic     |

|     |             |        |                        |         |              |
|-----|-------------|--------|------------------------|---------|--------------|
| 946 | Admission 1 | Male   | Blue Cross PI COMM     | White   | Hispanic     |
| 947 | Admission 1 | Female | Mohawk Vall MEDICAID   | White   | Hispanic     |
| 948 | Admission 1 | Male   | Emergency N MEDICAID   | Unknown | Hispanic     |
| 949 | Admission 1 | Male   | Mohawk Vall MEDICAID   | Other   | Not Hispanic |
| 950 | Admission 2 | Male   | Mohawk Vall MEDICAID   | NA      | NA           |
| 951 | Admission 1 | Female | Medicare MEDICARE      | Unknown | Unknown      |
| 952 | Admission 1 | Male   | Medicare MEDICARE      | White   | Not Hispanic |
| 953 | Admission 1 | Male   | Fidelis Chp MEDICAID   | Other   | Not Hispanic |
| 954 | Admission 1 | Female | Better Health MEDICAID | Unknown | Hispanic     |
| 955 | Admission 1 | Female | Medicare MEDICARE      | White   | Not Hispanic |
| 956 | Admission 1 | Male   | Fidel Essenti MEDICAID | White   | Not Hispanic |
| 957 | Admission 1 | Female | Affinity Heal MEDICAID | White   | Not Hispanic |
| 958 | Admission 1 | Male   | Emergency N MEDICAID   | Other   | Not Hispanic |
| 959 | Admission 1 | Male   | Medicaid MEDICAID      | Unknown | Not Hispanic |
| 960 | Admission 1 | Male   | Blue Cross PI COMM     | Unknown | Not Hispanic |
| 961 | Admission 1 | Female | Medicare MEDICARE      | White   | Not Hispanic |
| 962 | Admission 1 | Female | Medicare MEDICARE      | White   | Not Hispanic |
| 963 | Admission 1 | Female | Affinity Heal MEDICAID | White   | Not Hispanic |
| 964 | Admission 1 | Male   | Medicare MEDICARE      | Asian   | Not Hispanic |
| 965 | Admission 1 | Female | Blue Cross PI COMM     | Black   | Not Hispanic |
| 966 | Admission 1 | Female | Medicare MEDICARE      | White   | Not Hispanic |
| 967 | Admission 2 | Female | Medicare MEDICARE      | NA      | NA           |
| 968 | Admission 1 | Male   | Medicare MEDICARE      | Black   | Not Hispanic |
| 969 | Admission 1 | Male   | Blue Cross H MEDICAID  | White   | Not Hispanic |
| 970 | Admission 1 | Female | Blue Cross In COMM     | Unknown | Not Hispanic |
| 971 | Admission 1 | Male   | Blue Cross In COMM     | White   | Not Hispanic |
| 972 | Admission 1 | Female | Cigna Health COMM      | White   | Not Hispanic |
| 973 | Admission 1 | Male   | Medicare MEDICARE      | White   | Not Hispanic |
| 974 | Admission 1 | Female | Medicare MEDICARE      | White   | Not Hispanic |
| 975 | Admission 1 | Male   | Medicare MEDICARE      | Black   | Not Hispanic |
| 976 | Admission 2 | Male   | Medicare MEDICARE      | NA      | NA           |
| 977 | Admission 1 | Male   | Medicare MEDICARE      | White   | Not Hispanic |
| 978 | Admission 1 | Female | Medicare MEDICARE      | White   | Not Hispanic |
| 979 | Admission 1 | Male   | Medicare MEDICARE      | White   | Not Hispanic |
| 980 | Admission 1 | Female | Medicaid MEDICAID      | White   | Not Hispanic |
| 981 | Admission 1 | Male   | Medicare MEDICARE      | White   | Not Hispanic |
| 982 | Admission 1 | Male   | Blue Cross O COMM      | White   | Not Hispanic |
| 983 | Admission 1 | Male   | Cigna Health COMM      | Black   | Not Hispanic |
| 984 | Admission 1 | Female | Medicare MEDICARE      | White   | Not Hispanic |
| 985 | Admission 1 | Female | Mvp Essenti MEDICAID   | Unknown | Hispanic     |
| 986 | Admission 1 | Female | Mohawk Vall MEDICAID   | Black   | Not Hispanic |
| 987 | Admission 1 | Male   | Hip HMO COMM           | White   | Hispanic     |
| 988 | Admission 1 | Male   | Affinity Heal MEDICAID | Black   | Not Hispanic |
| 989 | Admission 1 | Male   | Medicaid MEDICAID      | White   | Not Hispanic |
| 990 | Admission 1 | Male   | Medicare MEDICARE      | Black   | Not Hispanic |

|      |             |        |                |          |         |              |
|------|-------------|--------|----------------|----------|---------|--------------|
| 991  | Admission 1 | Male   | Medicare       | MEDICARE | White   | Not Hispanic |
| 992  | Admission 1 | Male   | Medicare       | MEDICARE | Other   | Hispanic     |
| 993  | Admission 1 | Female | Medicare       | MEDICARE | White   | Hispanic     |
| 994  | Admission 1 | Female | MVP Essenti    | MEDICAID | Unknown | Hispanic     |
| 995  | Admission 1 | Female | UNITED HEA     | MEDICARE | White   | Not Hispanic |
| 996  | Admission 1 | Female | AETNA MCR      | MEDICARE | White   | Not Hispanic |
| 997  | Admission 1 | Male   | BLUE CROSS     | COMM     | White   | Not Hispanic |
| 998  | Admission 1 | Male   | HIP MCD        | MEDICAID | White   | Not Hispanic |
| 999  | Admission 1 | Female | Medicare       | MEDICARE | White   | Not Hispanic |
| 1000 | Admission 1 | Female | Medicare       | MEDICARE | White   | Not Hispanic |
| 1001 | Admission 2 | Female | Medicare       | MEDICARE | NA      | NA           |
| 1002 | Admission 1 | Male   | Medicare       | MEDICARE | Black   | Not Hispanic |
| 1003 | Admission 2 | Male   | Medicare       | MEDICARE | NA      | NA           |
| 1004 | Admission 1 | Male   | OXFORD HEA     | COMM     | White   | Not Hispanic |
| 1005 | Admission 1 | Female | BETTER HEA     | MEDICAID | Black   | Not Hispanic |
| 1006 | Admission 1 | Female | AFFINITY HL    | MEDICAID | Black   | Not Hispanic |
| 1007 | Admission 1 | Male   | Blue Cross PI  | COMM     | Unknown | Unknown      |
| 1008 | Admission 1 | Female | Medicare       | MEDICARE | White   | Not Hispanic |
| 1009 | Admission 1 | Female | Centerlight    | MEDICARE | Black   | Not Hispanic |
| 1010 | Admission 1 | Female | Medicare       | MEDICARE | White   | Not Hispanic |
| 1011 | Admission 1 | Female | Medicare       | MEDICARE | White   | Not Hispanic |
| 1012 | Admission 1 | Male   | OXFORD HEA     | COMM     | White   | Not Hispanic |
| 1013 | Admission 1 | Male   | EMERGENCY      | MEDICAID | White   | Not Hispanic |
| 1014 | Admission 1 | Male   | MVP HUDSO      | MEDICAID | White   | Hispanic     |
| 1015 | Admission 1 | Female | Blue Cross M   | MEDICARE | White   | Not Hispanic |
| 1016 | Admission 2 | Female | Blue Cross M   | MEDICARE | NA      | NA           |
| 1017 | Admission 1 | Female | Health First I | MEDICARE | Unknown | Hispanic     |
| 1018 | Admission 1 | Male   | Medicare       | MEDICARE | White   | Not Hispanic |
| 1019 | Admission 1 | Female | HIP MCR        | MEDICARE | Black   | Not Hispanic |
| 1020 | Admission 1 | Male   | Medicare       | MEDICARE | White   | Not Hispanic |
| 1021 | Admission 1 | Female | LOCAL 1199-    | COMM     | Black   | Not Hispanic |
| 1022 | Admission 1 | Female | HIP MCR        | MEDICARE | White   | Not Hispanic |
| 1023 | Admission 1 | Female | Medicare       | MEDICARE | Black   | Not Hispanic |
| 1024 | Admission 1 | Male   | UNITED HEA     | COMM     | White   | Not Hispanic |
| 1025 | Admission 1 | Female | Medicare       | MEDICARE | White   | Not Hispanic |
| 1026 | Admission 1 | Female | Blue Cross M   | MEDICARE | White   | Not Hispanic |
| 1027 | Admission 2 | Female | Blue Cross M   | MEDICARE | NA      | NA           |
| 1028 | Admission 1 | Female | Medicare       | MEDICARE | White   | Not Hispanic |
| 1029 | Admission 1 | Male   | BLUE CROSS     | COMM     | Other   | Hispanic     |
| 1030 | Admission 1 | Male   | Medicare       | MEDICARE | Unknown | Hispanic     |
| 1031 | Admission 1 | Male   | BLUE CROSS     | COMM     | White   | Not Hispanic |
| 1032 | Admission 1 | Male   | BLUE CROSS     | COMM     | Black   | Not Hispanic |
| 1033 | Admission 1 | Male   | Medicare       | MEDICARE | Black   | Not Hispanic |
| 1034 | Admission 1 | Male   | UMR.POMCC      | COMM     | Black   | Not Hispanic |
| 1035 | Admission 1 | Male   | AETNA MCR      | MEDICARE | Black   | Not Hispanic |

|      |             |        |                |          |         |              |
|------|-------------|--------|----------------|----------|---------|--------------|
| 1036 | Admission 1 | Female | GHI EPO        | COMM     | Black   | Not Hispanic |
| 1037 | Admission 1 | Male   | Medicare       | MEDICARE | Unknown | Unknown      |
| 1038 | Admission 1 | Female | Medicare       | MEDICARE | White   | Not Hispanic |
| 1039 | Admission 1 | Male   | BLUE CROSS     | COMM     | White   | Not Hispanic |
| 1040 | Admission 1 | Female | BLUE CROSS     | COMM     | White   | Not Hispanic |
| 1041 | Admission 1 | Male   | BLUE CROSS     | COMM     | White   | Not Hispanic |
| 1042 | Admission 1 | Female | Medicare       | MEDICARE | White   | Not Hispanic |
| 1043 | Admission 1 | Male   | AETNA MCR      | MEDICARE | White   | Not Hispanic |
| 1044 | Admission 1 | Male   | MAGNA PRE      | COMM     | Black   | Not Hispanic |
| 1045 | Admission 1 | Male   | Blue Cross N   | MEDICARE | White   | Not Hispanic |
| 1046 | Admission 1 | Female | OXFORD HEA     | COMM     | White   | Not Hispanic |
| 1047 | Admission 1 | Male   | Medicare       | MEDICARE | Black   | Not Hispanic |
| 1048 | Admission 1 | Female | UNITED HEA     | MEDICARE | Black   | Not Hispanic |
| 1049 | Admission 1 | Male   | Medicare       | MEDICARE | White   | Not Hispanic |
| 1050 | Admission 1 | Male   | Medicare       | MEDICARE | White   | Not Hispanic |
| 1051 | Admission 1 | Male   | LOCAL 1199-    | COMM     | Black   | Not Hispanic |
| 1052 | Admission 1 | Female | MVP HUDSO      | MEDICAID | White   | Hispanic     |
| 1053 | Admission 1 | Male   | Medicare       | MEDICARE | White   | Not Hispanic |
| 1054 | Admission 1 | Female | Medicare       | MEDICARE | Black   | Not Hispanic |
| 1055 | Admission 1 | Female | Medicare       | MEDICARE | White   | Not Hispanic |
| 1056 | Admission 1 | Male   | Blue Cross PI  | COMM     | White   | Not Hispanic |
| 1057 | Admission 1 | Female | OXFORD HEA     | COMM     | White   | Not Hispanic |
| 1058 | Admission 1 | Male   | EMERGENCY      | MEDICAID | White   | Hispanic     |
| 1059 | Admission 1 | Male   | EMBLEM HE/     | MEDICAID | White   | Hispanic     |
| 1060 | Admission 1 | Male   | Medicare       | MEDICARE | White   | Not Hispanic |
| 1061 | Admission 1 | Female | BLUE CROSS     | COMM     | Black   | Not Hispanic |
| 1062 | Admission 1 | Female | Medicare       | MEDICARE | White   | Not Hispanic |
| 1063 | Admission 1 | Male   | CIGNA HEAL     | COMM     | Unknown | Hispanic     |
| 1064 | Admission 1 | Male   | Blue Cross PI  | COMM     | Other   | Hispanic     |
| 1065 | Admission 1 | Female | Blue Cross N   | MEDICARE | White   | Not Hispanic |
| 1066 | Admission 1 | Female | Health First I | MEDICARE | Black   | Not Hispanic |
| 1067 | Admission 1 | Female | Blue Cross PI  | COMM     | Black   | Not Hispanic |
| 1068 | Admission 1 | Male   | AETNA POS      | COMM     | Asian   | Not Hispanic |
| 1069 | Admission 1 | Male   | EMBLEM HE/     | MEDICAID | Unknown | Hispanic     |
| 1070 | Admission 1 | Female | Medicare       | MEDICARE | White   | Not Hispanic |
| 1071 | Admission 1 | Male   | Medicare       | MEDICARE | White   | Not Hispanic |
| 1072 | Admission 1 | Female | Medicare       | MEDICARE | Black   | Not Hispanic |
| 1073 | Admission 1 | Female | Medicare       | MEDICARE | White   | Not Hispanic |
| 1074 | Admission 1 | Female | OXFORD HEA     | COMM     | White   | Not Hispanic |
| 1075 | Admission 1 | Male   | MAGNA PRE      | COMM     | Unknown | Not Hispanic |
| 1076 | Admission 1 | Female | BLUE CROSS     | COMM     | White   | Not Hispanic |
| 1077 | Admission 1 | Female | Medicare       | MEDICARE | Unknown | Not Hispanic |
| 1078 | Admission 1 | Female | LOCAL 1199-    | COMM     | White   | Not Hispanic |
| 1079 | Admission 1 | Female | Medicare       | MEDICARE | White   | Not Hispanic |
| 1080 | Admission 1 | Female | OXFORD HEA     | COMM     | White   | Not Hispanic |



|      |             |        |               |          |         |              |
|------|-------------|--------|---------------|----------|---------|--------------|
| 1081 | Admission 1 | Female | Medicaid      | MEDICAID | White   | Not Hispanic |
| 1082 | Admission 1 | Female | MVP Essenti   | MEDICAID | Unknown | Hispanic     |
| 1083 | Admission 1 | Male   | Blue Cross M  | MEDICARE | Unknown | Hispanic     |
| 1084 | Admission 1 | Male   | Medicare      | MEDICARE | White   | Not Hispanic |
| 1085 | Admission 1 | Female | Medicare      | MEDICARE | Other   | Not Hispanic |
| 1086 | Admission 1 | Female | Blue Cross PI | COMM     | White   | Not Hispanic |
| 1087 | Admission 2 | Female | Blue Cross PI | COMM     | NA      | NA           |
| 1088 | Admission 1 | Male   | MCAID JZAN    | MEDICAID | White   | Hispanic     |
| 1089 | Admission 1 | Male   | BLUE CROSS    | COMM     | White   | Not Hispanic |
| 1090 | Admission 1 | Male   | Blue Cross PI | COMM     | Unknown | Hispanic     |
| 1091 | Admission 1 | Female | HIP MCR       | MEDICARE | White   | Not Hispanic |
| 1092 | Admission 1 | Male   | Medicaid      | MEDICAID | Unknown | Hispanic     |
| 1093 | Admission 1 | Male   | AETNA POS     | COMM     | White   | Hispanic     |
| 1094 | Admission 1 | Male   | MVP HUDSO     | MEDICAID | Other   | Not Hispanic |
| 1095 | Admission 1 | Female | Medicare      | MEDICARE | White   | Not Hispanic |
| 1096 | Admission 1 | Female | Medicare      | MEDICARE | White   | Not Hispanic |
| 1097 | Admission 1 | Male   | Medicare      | MEDICARE | Unknown | Hispanic     |
| 1098 | Admission 1 | Female | Medicare      | MEDICARE | Unknown | Hispanic     |
| 1099 | Admission 1 | Female | Blue Cross M  | MEDICARE | Asian   | Not Hispanic |
| 1100 | Admission 1 | Female | Medicare      | MEDICARE | White   | Hispanic     |
| 1101 | Admission 1 | Female | Medicare      | MEDICARE | White   | Hispanic     |
| 1102 | Admission 1 | Male   | Medicare      | MEDICARE | White   | Hispanic     |
| 1103 | Admission 1 | Female | Medicare      | MEDICARE | White   | Not Hispanic |
| 1104 | Admission 1 | Male   | BETTER HEAL   | MEDICAID | White   | Hispanic     |
| 1105 | Admission 2 | Male   | BETTER HEAL   | MEDICAID | NA      | NA           |
| 1106 | Admission 1 | Female | Pma           | COMM     | White   | Not Hispanic |
| 1107 | Admission 1 | Female | Fidelis Medic | MEDICARE | Black   | Hispanic     |
| 1108 | Admission 1 | Male   | Medicare      | MEDICARE | White   | Not Hispanic |
| 1109 | Admission 1 | Female | MVP Essenti   | MEDICAID | Unknown | Hispanic     |
| 1110 | Admission 1 | Male   | Blue Cross P  | COMM     | Unknown | Hispanic     |
| 1111 | Admission 1 | Male   | Metro Plus    | MEDICAID | White   | Hispanic     |
| 1112 | Admission 1 | Male   | Affinity Heal | MEDICAID | Unknown | Not Hispanic |
| 1113 | Admission 1 | Female | Aetna         | COMM     | Unknown | Unknown      |
| 1114 | Admission 1 | Male   | Medicare      | MEDICARE | White   | Not Hispanic |
| 1115 | Admission 1 | Female | Aetna Pos     | COMM     | White   | Hispanic     |
| 1116 | Admission 1 | Male   | Medicare      | MEDICARE | White   | Not Hispanic |
| 1117 | Admission 1 | Male   | Medicare      | MEDICARE | White   | Not Hispanic |
| 1118 | Admission 1 | Female | Medicare      | MEDICARE | White   | Not Hispanic |
| 1119 | Admission 1 | Male   | Oxford Healt  | COMM     | Black   | Not Hispanic |
| 1120 | Admission 1 | Female | Medicare      | MEDICARE | White   | Not Hispanic |
| 1121 | Admission 1 | Male   | Blue Cross PI | COMM     | Black   | Not Hispanic |
| 1122 | Admission 1 | Male   | Better Health | MEDICAID | Black   | Not Hispanic |
| 1123 | Admission 1 | Male   | Medicare      | MEDICARE | Black   | Not Hispanic |
| 1124 | Admission 1 | Male   | self          | SP       | Asian   | Not Hispanic |
| 1125 | Admission 1 | Male   | Medicare      | MEDICARE | White   | Not Hispanic |

|      |             |        |               |          |         |              |
|------|-------------|--------|---------------|----------|---------|--------------|
| 1126 | Admission 1 | Male   | Medicare      | MEDICARE | White   | Not Hispanic |
| 1127 | Admission 1 | Male   | Blue Cross PI | COMM     | White   | Not Hispanic |
| 1128 | Admission 1 | Female | Medicare      | MEDICARE | Black   | Not Hispanic |
| 1129 | Admission 1 | Female | UNHC Comm     | MEDICARE | White   | Not Hispanic |
| 1130 | Admission 1 | Male   | Blue Cross PI | COMM     | White   | Not Hispanic |
| 1131 | Admission 1 | Male   | Cigna Health  | COMM     | White   | Not Hispanic |
| 1132 | Admission 1 | Male   | United Healt  | COMM     | White   | Not Hispanic |
| 1133 | Admission 1 | Female | Medicaid      | MEDICAID | White   | Not Hispanic |
| 1134 | Admission 1 | Male   | Aetna POS     | COMM     | White   | Not Hispanic |
| 1135 | Admission 1 | Male   | Medicare      | MEDICARE | White   | Not Hispanic |
| 1136 | Admission 1 | Male   | Medicare      | MEDICARE | White   | Not Hispanic |
| 1137 | Admission 1 | Male   | Blue Cross V  | MEDICARE | Black   | Not Hispanic |
| 1138 | Admission 1 | Female | Medicare      | MEDICARE | White   | Not Hispanic |
| 1139 | Admission 1 | Male   | Medicare      | MEDICARE | Black   | Not Hispanic |
| 1140 | Admission 1 | Male   | Medicare      | MEDICARE | Black   | Not Hispanic |
| 1141 | Admission 1 | Male   | UMR.pomco     | COMM     | Black   | Not Hispanic |
| 1142 | Admission 1 | Female | Medicare      | MEDICARE | Black   | Not Hispanic |
| 1143 | Admission 1 | Male   | Aetna Medic   | MEDICARE | White   | Not Hispanic |
| 1144 | Admission 1 | Male   | Aetna Medic   | MEDICARE | White   | Not Hispanic |
| 1145 | Admission 2 | Male   | Aetna Medic   | MEDICARE | NA      | NA           |
| 1146 | Admission 1 | Female | Hip Medicare  | MEDICARE | Other   | Not Hispanic |
| 1147 | Admission 2 | Female | Hip Medicare  | MEDICARE | NA      | NA           |
| 1148 | Admission 1 | Female | Aetna Medic   | MEDICARE | Black   | Not Hispanic |
| 1149 | Admission 1 | Male   | Magna Prefe   | COMM     | Black   | Not Hispanic |
| 1150 | Admission 1 | Male   | Medicare      | MEDICARE | White   | Not Hispanic |
| 1151 | Admission 1 | Male   | Medicare      | MEDICARE | White   | Not Hispanic |
| 1152 | Admission 1 | Male   | Emergency N   | MEDICAID | White   | Not Hispanic |
| 1153 | Admission 1 | Female | Aetna Medic   | MEDICARE | White   | Not Hispanic |
| 1154 | Admission 1 | Male   | Medicare      | MEDICARE | White   | Not Hispanic |
| 1155 | Admission 1 | Male   | UMR Pomco     | COMM     | Black   | Not Hispanic |
| 1156 | Admission 1 | Male   | Blue Cross V  | COMM     | Black   | Not Hispanic |
| 1157 | Admission 1 | Male   | Blue Cross PI | COMM     | Black   | Not Hispanic |
| 1158 | Admission 1 | Female | United Healt  | MEDICARE | White   | Not Hispanic |
| 1159 | Admission 1 | Male   | emergency n   | MEDICAID | Other   | Hispanic     |
| 1160 | Admission 1 | Female | Aetna Medic   | MEDICARE | White   | Not Hispanic |
| 1161 | Admission 1 | Male   | Mohawk Vall   | MEDICAID | White   | Hispanic     |
| 1162 | Admission 1 | Male   | Medicare      | MEDICARE | White   | Hispanic     |
| 1163 | Admission 1 | Male   | Medicaid      | MEDICAID | White   | Not Hispanic |
| 1164 | Admission 1 | Female | Medicare      | MEDICARE | Unknown | Hispanic     |
| 1165 | Admission 1 | Male   | Blue Cross V  | COMM     | Asian   | Not Hispanic |
| 1166 | Admission 1 | Female | United Healt  | MEDICARE | White   | Not Hispanic |
| 1167 | Admission 1 | Male   | United Healt  | MEDICARE | White   | Not Hispanic |
| 1168 | Admission 1 | Female | United Healt  | MEDICARE | White   | Not Hispanic |
| 1169 | Admission 1 | Female | Blue Cross V  | COMM     | White   | Hispanic     |
| 1170 | Admission 1 | Male   | Healthfirst N | MEDICAID | White   | Not Hispanic |

|      |             |        |               |          |         |              |
|------|-------------|--------|---------------|----------|---------|--------------|
| 1171 | Admission 1 | Male   | Medicaid      | MEDICAID | Other   | Hispanic     |
| 1172 | Admission 1 | Female | Medicare      | MEDICARE | White   | Not Hispanic |
| 1173 | Admission 2 | Female | Medicare      | MEDICARE | NA      | NA           |
| 1174 | Admission 1 | Male   | Medicare      | MEDICARE | Unknown | Not Hispanic |
| 1175 | Admission 1 | Male   | Medicare      | MEDICARE | White   | Not Hispanic |
| 1176 | Admission 1 | Male   | Local 1199    | COMM     | Black   | Not Hispanic |
| 1177 | Admission 1 | Female | Healthfirst N | MEDICARE | Unknown | Hispanic     |

|              |               |          |    |                 |           |           |
|--------------|---------------|----------|----|-----------------|-----------|-----------|
| NA           | NA            | Complete | 64 | Home            | Unchecked | Unchecked |
| Other        | Dominican     | Complete | 38 | Home            | Unchecked | Unchecked |
| Other        | other hispani | Complete | 57 | Home            | Unchecked | Unchecked |
| NA           | NA            | Complete | 34 | Home            | Unchecked | Unchecked |
| Other        | Ecuadorian    | Complete | 67 | Doctor Office   | Unchecked | Unchecked |
| NA           | NA            | Complete | 90 | Assisted Living | Unchecked | Unchecked |
| NA           | NA            | Complete | 62 | Home            | Checked   | Checked   |
| NA           | NA            | Complete | 81 | Assisted Living | Unchecked | Unchecked |
| Other        | Peruvian      | Complete | 31 | Home            | Checked   | Checked   |
| Mexican      | NA            | Complete | 48 | Home            | Unchecked | Checked   |
| Other        | Peruvian      | Complete | 48 | Home            | Unchecked | Checked   |
| NA           | NA            | Complete | 50 | Home            | Checked   | Unchecked |
| NA           | NA            | Complete | 59 | Home            | Unchecked | Checked   |
| NA           | NA            | Complete | 65 | Home            | Unchecked | Checked   |
| Other        | Chilean       | Complete | 37 | Home            | Checked   | Unchecked |
| Other        | other hispani | Complete | 54 | Doctor Office   | Unchecked | Checked   |
| NA           | NA            | Complete | 29 | Doctor Office   | Checked   | Checked   |
| NA           | NA            | Complete | 42 | Home            | Checked   | Unchecked |
| NA           | NA            | Complete | 53 | Urgent Care     | Unchecked | Checked   |
| NA           | NA            | Complete | 88 | Assisted Living | Checked   | Checked   |
| NA           | NA            | Complete | 89 | Assisted Living | Unchecked | Unchecked |
| NA           | NA            | Complete | 67 | Home            | Unchecked | Unchecked |
| NA           | NA            | Complete | 88 | Home            | Checked   | Unchecked |
| NA           | NA            | Complete | 89 | Home            | Unchecked | Unchecked |
| NA           | NA            | Complete | 43 | Home            | Unchecked | Unchecked |
| Puerto Rican | NA            | Complete | 84 | Home            | Unchecked | Unchecked |
| NA           | NA            | Complete | 64 | Hospital Trar   | Unchecked | Unchecked |
| NA           | NA            | Complete | 75 | Assisted Living | Unchecked | Unchecked |
| NA           | NA            | Complete | 54 | Home            | Unchecked | Unchecked |
| NA           | NA            | Complete | 37 | Home            | Unchecked | Unchecked |
| NA           | NA            | Complete | 51 | Home            | Checked   | Checked   |
| Other        | Peruvian      | Complete | 39 | Home            | Unchecked | Unchecked |
| Other        | Chilean       | Complete | 68 | SNF/NH          | Checked   | Checked   |
| NA           | NA            | Complete | 57 | Home            | Checked   | Checked   |
| NA           | NA            | Complete | 68 | Urgent Care     | Unchecked | Unchecked |
| NA           | NA            | Complete | 34 | Home            | Unchecked | Checked   |
| Other        | Spaniard      | Complete | 38 | Home            | Checked   | Unchecked |
| NA           | NA            | NA       | 38 | Home            | Unchecked | Unchecked |
| NA           | NA            | Complete | 45 | Hospital Trar   | Unchecked | Unchecked |
| Other        | NA            | Complete | 84 | Home            | Unchecked | Unchecked |
| NA           | NA            | Complete | 61 | Doctor Office   | Unchecked | Unchecked |
| NA           | NA            | NA       | 61 | Home            | Unchecked | Unchecked |
| NA           | NA            | Complete | 66 | Doctor Office   | Unchecked | Unchecked |
| Puerto Rican | NA            | Complete | 67 | SNF/NH          | Unchecked | Unchecked |
| Other        | Peruvian      | Complete | 52 | Home            | Unchecked | Unchecked |

|         |             |          |                      |           |           |
|---------|-------------|----------|----------------------|-----------|-----------|
| NA      | NA          | Complete | 37 Home              | Unchecked | Unchecked |
| Mexican | NA          | Complete | 70 Home              | Checked   | Unchecked |
| NA      | NA          | Complete | 91 Urgent Care       | Unchecked | Unchecked |
| NA      | NA          | Complete | 86 Home              | Unchecked | Checked   |
| Other   | Ecuadorian  | Complete | 53 Home              | Checked   | Checked   |
| NA      | NA          | Complete | 77 SNF/NH            | Unchecked | Unchecked |
| NA      | NA          | Complete | 42 NA                | Unchecked | Unchecked |
| Mexican | NA          | Complete | 60 Home              | Checked   | Checked   |
| NA      | NA          | Complete | 72 Home              | Checked   | Unchecked |
| NA      | NA          | Complete | 61 Home              | Unchecked | Unchecked |
| Other   | Colombian   | Complete | 54 Home              | Checked   | Checked   |
| Other   | Costa Rican | Complete | 47 Other             | Unchecked | Unchecked |
| Other   | Dominican   | Complete | 55 Home              | Checked   | Checked   |
| NA      | NA          | Complete | 31 Home              | Checked   | Checked   |
| NA      | NA          | Complete | 81 SNF/NH            | Unchecked | Checked   |
| NA      | NA          | Complete | 62 Home              | Unchecked | Checked   |
| Mexican | NA          | Complete | 59 Home              | Checked   | Unchecked |
| NA      | NA          | Complete | 85 SNF/NH            | Unchecked | Unchecked |
| NA      | NA          | Complete | 29 Home              | Unchecked | Unchecked |
| Mexican | NA          | Complete | 58 Home              | Checked   | Checked   |
| Mexican | NA          | Complete | 42 NA                | Checked   | Unchecked |
| NA      | NA          | Complete | 71 Assisted Living   | Checked   | Checked   |
| Other   | Peruvian    | Complete | 66 Home              | Checked   | Checked   |
| NA      | NA          | Complete | 52 Home              | Checked   | Checked   |
| Other   | Guatemalan  | Complete | 51 Home              | Checked   | Checked   |
| NA      | NA          | Complete | 62 Home              | Checked   | Unchecked |
| NA      | NA          | Complete | 86 Home              | Unchecked | Unchecked |
| NA      | NA          | Complete | 71 Home              | Unchecked | Unchecked |
| NA      | NA          | Complete | 41 Hospital Transfer | Unchecked | Checked   |
| Other   | Dominican   | Complete | 77 Hospital Transfer | Unchecked | Checked   |
| NA      | NA          | Complete | 90 Home              | Unchecked | Unchecked |
| NA      | NA          | Complete | 40 Home              | Checked   | Checked   |
| NA      | NA          | Complete | 76 Home              | Unchecked | Unchecked |
| NA      | NA          | Complete | 47 Other             | Unchecked | Unchecked |
| NA      | NA          | Complete | 71 SNF/NH            | Unchecked | Unchecked |
| NA      | NA          | Complete | 91 Rehabilitation    | Unchecked | Unchecked |
| NA      | NA          | NA       | 91 Rehabilitation    | Checked   | Unchecked |
| NA      | NA          | Complete | 44 Home              | Checked   | Checked   |
| NA      | NA          | Complete | 73 Group Home        | Unchecked | Checked   |
| NA      | NA          | Complete | 80 Home              | Unchecked | Unchecked |
| NA      | NA          | Complete | 33 Urgent Care       | Checked   | Checked   |
| NA      | NA          | Complete | 83 Home              | Unchecked | Unchecked |
| NA      | NA          | Complete | 81 Home              | Unchecked | Checked   |
| NA      | NA          | Complete | 93 Home              | Checked   | Checked   |
| NA      | NA          | Complete | 77 Home              | Unchecked | Checked   |

|         |             |          |    |                   |           |           |
|---------|-------------|----------|----|-------------------|-----------|-----------|
| NA      | NA          | Complete | 95 | Assisted Living   | Unchecked | Checked   |
| NA      | NA          | Complete | 89 | Home              | Unchecked | Checked   |
| NA      | NA          | Complete | 87 | Home              | Unchecked | Unchecked |
| NA      | NA          | Complete | 60 | Home              | Checked   | Unchecked |
| NA      | NA          | Complete | 91 | Assisted Living   | Unchecked | Unchecked |
| NA      | NA          | Complete | 90 | Home              | Checked   | Unchecked |
| NA      | NA          | Complete | 59 | Home              | Checked   | Checked   |
| NA      | NA          | Complete | 91 | SNF/NH            | Unchecked | Unchecked |
| NA      | NA          | Complete | 30 | Home              | Checked   | Checked   |
| NA      | NA          | Complete | 92 | Home              | Unchecked | Checked   |
| NA      | NA          | Complete | 81 | Home              | Unchecked | Unchecked |
| NA      | NA          | Complete | 73 | Hospital Transfer | Checked   | Unchecked |
| NA      | NA          | Complete | 61 | Home              | Checked   | Checked   |
| NA      | NA          | Complete | 76 | Home              | Checked   | Checked   |
| NA      | NA          | Complete | 64 | Home              | Unchecked | Checked   |
| NA      | NA          | Complete | 98 | Doctor Office     | Checked   | Checked   |
| NA      | NA          | Complete | 49 | Home              | Checked   | Unchecked |
| NA      | NA          | Complete | 79 | Assisted Living   | Unchecked | Unchecked |
| NA      | NA          | Complete | 61 | Home              | Unchecked | Unchecked |
| NA      | NA          | Complete | 79 | Group Home        | Checked   | Checked   |
| NA      | NA          | NA       | 79 | Group Home        | Checked   | Checked   |
| NA      | NA          | Complete | 89 | Home              | Unchecked | Unchecked |
| Other   | Argentinean | Complete | 77 | Home              | Unchecked | Checked   |
| NA      | NA          | Complete | 95 | Home              | Unchecked | Checked   |
| NA      | NA          | Complete | 89 | Home              | Unchecked | Unchecked |
| NA      | NA          | NA       | 89 | Rehabilitation    | Unchecked | Unchecked |
| NA      | NA          | Complete | 75 | Home              | Checked   | Checked   |
| NA      | NA          | Complete | 56 | Home              | Checked   | Unchecked |
| Mexican | NA          | Complete | 47 | Home              | Unchecked | Unchecked |
| NA      | NA          | Complete | 49 | Home              | Checked   | Checked   |
| NA      | NA          | Complete | 79 | Home              | Checked   | Unchecked |
| NA      | NA          | Complete | 61 | Other             | Checked   | Unchecked |
| NA      | NA          | Complete | 58 | Home              | Unchecked | Checked   |
| NA      | NA          | Complete | 60 | Home              | Checked   | Checked   |
| NA      | NA          | Complete | 94 | SNF/NH            | Unchecked | Checked   |
| NA      | NA          | Complete | 52 | Other             | Unchecked | Unchecked |
| NA      | NA          | Complete | 72 | Home              | Checked   | Checked   |
| NA      | NA          | Complete | 66 | Home              | Unchecked | Unchecked |
| NA      | NA          | Complete | 52 | Hospital Transfer | Unchecked | Unchecked |
| NA      | NA          | Complete | 64 | Home              | Checked   | Checked   |
| NA      | NA          | Complete | 70 | Home              | Checked   | Checked   |
| NA      | NA          | Complete | 83 | Home              | Checked   | Unchecked |
| NA      | NA          | NA       | 83 | Home              | Unchecked | Unchecked |
| NA      | NA          | Complete | 60 | Home              | Unchecked | Checked   |
| NA      | NA          | Complete | 56 | Home              | Unchecked | Checked   |

|         |            |          |    |                 |           |           |
|---------|------------|----------|----|-----------------|-----------|-----------|
| NA      | NA         | Complete | 31 | Hospital Trar   | Checked   | Checked   |
| NA      | NA         | Complete | 84 | Home            | Unchecked | Unchecked |
| NA      | NA         | Complete | 64 | Home            | Unchecked | Checked   |
| NA      | NA         | Complete | 58 | Home            | Checked   | Checked   |
| Other   | Peruvian   | Complete | 57 | Home            | Checked   | Checked   |
| NA      | NA         | Complete | 40 | Home            | Unchecked | Unchecked |
| NA      | NA         | Complete | 95 | Home            | Checked   | Checked   |
| NA      | NA         | Complete | 67 | Home            | Checked   | Checked   |
| NA      | NA         | Complete | 61 | Home            | Unchecked | Checked   |
| NA      | NA         | Complete | 20 | Group Home      | Checked   | Checked   |
| Mexican | NA         | Complete | 41 | Home            | Unchecked | Unchecked |
| NA      | NA         | Complete | 75 | Doctor Office   | Checked   | Checked   |
| NA      | NA         | Complete | 66 | Hospital Trar   | Unchecked | Unchecked |
| NA      | NA         | Complete | 82 | Home            | Unchecked | Unchecked |
| NA      | NA         | Complete | 48 | Home            | Checked   | Unchecked |
| Mexican | NA         | Complete | 51 | Home            | Unchecked | Unchecked |
| NA      | NA         | Complete | 77 | Home            | Checked   | Checked   |
| NA      | NA         | Complete | 72 | Other           | Checked   | Checked   |
| NA      | NA         | Complete | 50 | Doctor Office   | Checked   | Checked   |
| Other   | Dominican  | Complete | 88 | Home            | Unchecked | Unchecked |
| NA      | NA         | Complete | 53 | Doctor Office   | Unchecked | Unchecked |
| NA      | NA         | Complete | 86 | Home            | Unchecked | Unchecked |
| NA      | NA         | Complete | 73 | SNF/NH          | Unchecked | Unchecked |
| NA      | NA         | Complete | 64 | SNF/NH          | Unchecked | Unchecked |
| Other   | Ecuadorian | Complete | 77 | Home            | Checked   | Unchecked |
| NA      | NA         | Complete | 70 | Home            | Unchecked | Checked   |
| NA      | NA         | Complete | 94 | Assisted Living | Unchecked | Checked   |
| NA      | NA         | Complete | 58 | Other           | Unchecked | Unchecked |
| NA      | NA         | Complete | 22 | Home            | Unchecked | Unchecked |
| NA      | NA         | Complete | 89 | SNF/NH          | Checked   | Checked   |
| NA      | NA         | Complete | 50 | Home            | Unchecked | Unchecked |
| NA      | NA         | Complete | 23 | Home            | Checked   | Checked   |
| NA      | NA         | Complete | 68 | Home            | Unchecked | Unchecked |
| NA      | NA         | Complete | 79 | Urgent Care     | Unchecked | Checked   |
| NA      | NA         | Complete | 58 | Home            | Checked   | Checked   |
| NA      | NA         | Complete | 80 | Home            | Unchecked | Checked   |
| NA      | NA         | Complete | 85 | Home            | Checked   | Unchecked |
| NA      | NA         | Complete | 84 | NA              | Checked   | Unchecked |
| NA      | NA         | Complete | 35 | Home            | Checked   | Checked   |
| NA      | NA         | NA       | 35 | Home            | Unchecked | Unchecked |
| Mexican | NA         | Complete | 58 | Home            | Unchecked | Checked   |
| Other   | Dominican  | Complete | 18 | Home            | Checked   | Checked   |
| NA      | NA         | Complete | 60 | Home            | Checked   | Checked   |
| NA      | NA         | Complete | 85 | Urgent Care     | Unchecked | Checked   |
| NA      | NA         | Complete | 92 | Home            | Unchecked | Checked   |

|              |              |          |                    |           |           |
|--------------|--------------|----------|--------------------|-----------|-----------|
| Other        | Ecuadorian   | Complete | 77 Home            | Checked   | Unchecked |
| NA           | NA           | NA       | 77 NA              | Unchecked | Unchecked |
| Puerto Rican | NA           | Complete | 28 Home            | Checked   | Unchecked |
| NA           | NA           | NA       | 28 Home            | Unchecked | Unchecked |
| NA           | NA           | NA       | 28 NA              | Checked   | Unchecked |
| Other        | Latin Americ | Complete | 55 Doctor Office   | Checked   | Unchecked |
| NA           | NA           | Complete | 63 Home            | Checked   | Checked   |
| NA           | NA           | Complete | 89 Home            | Unchecked | Unchecked |
| NA           | NA           | Complete | 94 SNF/NH          | Unchecked | Unchecked |
| Other        | Ecuadorian   | Complete | 54 Home            | Checked   | Checked   |
| NA           | NA           | Complete | 91 Home            | Unchecked | Checked   |
| NA           | NA           | Complete | 68 Home            | Unchecked | Unchecked |
| NA           | NA           | Complete | 47 Home            | Unchecked | Unchecked |
| Other        | Peruvian     | Complete | 62 Home            | Checked   | Checked   |
| NA           | NA           | Complete | 96 Home            | Unchecked | Unchecked |
| NA           | NA           | Complete | 45 Home            | Checked   | Checked   |
| NA           | NA           | Complete | 85 Home            | Unchecked | Checked   |
| NA           | NA           | Complete | 67 Home            | Unchecked | Checked   |
| NA           | NA           | Complete | 41 Home            | Unchecked | Unchecked |
| NA           | NA           | Complete | 32 Home            | Unchecked | Checked   |
| NA           | NA           | Complete | 47 Home            | Checked   | Unchecked |
| NA           | NA           | Complete | 61 Home            | Checked   | Checked   |
| NA           | NA           | NA       | 61 Home            | Checked   | Checked   |
| NA           | NA           | Complete | 89 Home            | Checked   | Checked   |
| NA           | NA           | Complete | 78 Home            | Checked   | Unchecked |
| NA           | NA           | Complete | 61 Home            | Checked   | Checked   |
| NA           | NA           | Complete | 72 Home            | Checked   | Unchecked |
| NA           | NA           | Complete | 19 Home            | Unchecked | Unchecked |
| NA           | NA           | Complete | 60 Home            | Unchecked | Unchecked |
| NA           | NA           | Complete | 68 Home            | Unchecked | Unchecked |
| NA           | NA           | Complete | 87 Home            | Unchecked | Unchecked |
| NA           | NA           | Complete | 79 Home            | Unchecked | Unchecked |
| NA           | NA           | Complete | 59 Home            | Checked   | Unchecked |
| NA           | NA           | Complete | 44 Other           | Checked   | Checked   |
| NA           | NA           | Complete | 62 Group Home      | Checked   | Checked   |
| NA           | NA           | Complete | 84 Assisted Living | Checked   | Checked   |
| NA           | NA           | Complete | 70 Home            | Checked   | Unchecked |
| NA           | NA           | Complete | 60 Rehabilitatio   | Unchecked | Unchecked |
| NA           | NA           | Complete | 81 Home            | Unchecked | Checked   |
| NA           | NA           | Complete | 60 Home            | Checked   | Checked   |
| NA           | NA           | Complete | 70 Home            | Unchecked | Unchecked |
| Other        | Ecuadorian   | Complete | 49 Home            | Checked   | Unchecked |
| NA           | NA           | Complete | 82 Home            | Unchecked | Checked   |
| NA           | NA           | Complete | 40 Home            | Checked   | Unchecked |
| NA           | NA           | Complete | 96 SNF/NH          | Unchecked | Checked   |



|              |             |          |                    |           |           |
|--------------|-------------|----------|--------------------|-----------|-----------|
| NA           | NA          | Complete | 69 Home            | Unchecked | Checked   |
| NA           | NA          | Complete | 68 Home            | Checked   | Unchecked |
| NA           | NA          | Complete | 27 Group Home      | Unchecked | Checked   |
| NA           | NA          | Complete | 87 Assisted Living | Unchecked | Checked   |
| NA           | NA          | Complete | 73 Home            | Unchecked | Checked   |
| NA           | NA          | NA       | 73 Rehabilitatio   | Checked   | Unchecked |
| NA           | NA          | Complete | 61 Rehabilitatio   | Unchecked | Unchecked |
| NA           | NA          | Complete | 67 Home            | Unchecked | Checked   |
| NA           | NA          | Complete | 57 Home            | Checked   | Checked   |
| NA           | NA          | Complete | 66 SNF/NH          | Unchecked | Unchecked |
| NA           | NA          | NA       | 66 SNF/NH          | Unchecked | Checked   |
| NA           | NA          | Complete | 63 Urgent Care     | Checked   | Checked   |
| Other        | NA          | Complete | 49 Home            | Unchecked | Unchecked |
| NA           | NA          | Complete | 52 Home            | Unchecked | Unchecked |
| NA           | NA          | Complete | 64 Group Home      | Checked   | Checked   |
| NA           | NA          | Complete | 39 Home            | Unchecked | Unchecked |
| NA           | NA          | Complete | 80 Home            | Checked   | Checked   |
| NA           | NA          | Complete | 88 Assisted Living | Checked   | Checked   |
| NA           | NA          | Complete | 64 Home            | Checked   | Unchecked |
| NA           | NA          | Complete | 77 Home            | Checked   | Checked   |
| NA           | NA          | Complete | 78 Home            | Checked   | Checked   |
| NA           | NA          | Complete | 63 Hospital Trar   | Unchecked | Unchecked |
| NA           | NA          | NA       | 63 SNF/NH          | Unchecked | Unchecked |
| NA           | NA          | Complete | 78 Home            | Unchecked | Unchecked |
| NA           | NA          | Complete | 77 Urgent Care     | Unchecked | Unchecked |
| NA           | NA          | Complete | 91 Assisted Living | Unchecked | Unchecked |
| NA           | NA          | Complete | 65 Other           | Unchecked | Unchecked |
| Other        | South ameri | Complete | 66 SNF/NH          | Unchecked | Checked   |
| NA           | NA          | Complete | 75 Home            | Checked   | Checked   |
| NA           | NA          | NA       | 75 Home            | Unchecked | Unchecked |
| NA           | NA          | Complete | 63 Home            | Checked   | Checked   |
| NA           | NA          | Complete | 84 Home            | Checked   | Checked   |
| NA           | NA          | Complete | 59 SNF/NH          | Unchecked | Checked   |
| NA           | NA          | Complete | 84 Assisted Living | Unchecked | Unchecked |
| NA           | NA          | Complete | 66 Home            | Checked   | Checked   |
| Other        | colombian   | Complete | 97 SNF/NH          | Unchecked | Checked   |
| NA           | NA          | Complete | 52 Other           | Unchecked | Unchecked |
| NA           | NA          | Complete | 79 Rehabilitatio   | Unchecked | Unchecked |
| NA           | NA          | Complete | 32 Hospital Trar   | Checked   | Unchecked |
| NA           | NA          | Complete | 85 Home            | Unchecked | Checked   |
| NA           | NA          | NA       | 86 Home            | Unchecked | Checked   |
| Other        | Ecuadorian  | Complete | 67 Home            | Checked   | Unchecked |
| NA           | NA          | Complete | 65 Home            | Checked   | Unchecked |
| NA           | NA          | Complete | 54 Urgent Care     | Unchecked | Checked   |
| Puerto Rican | NA          | Complete | 85 Home            | Unchecked | Checked   |

|         |            |          |                    |           |           |
|---------|------------|----------|--------------------|-----------|-----------|
| Other   | ecuadorian | Complete | 34 Home            | Checked   | Checked   |
| NA      | NA         | Complete | 54 Home            | Unchecked | Unchecked |
| NA      | NA         | Complete | 78 Home            | Unchecked | Unchecked |
| Other   | Dominican  | Complete | 59 Home            | Unchecked | Unchecked |
| NA      | NA         | Complete | 91 Home            | Checked   | Unchecked |
| NA      | NA         | Complete | 89 Assisted Living | Unchecked | Unchecked |
| NA      | NA         | Complete | 61 Home            | Unchecked | Checked   |
| NA      | NA         | Complete | 70 Home            | Checked   | Checked   |
| NA      | NA         | Complete | 51 Home            | Checked   | Checked   |
| NA      | NA         | Complete | 54 NA              | Unchecked | Unchecked |
| NA      | NA         | NA       | 54 Group Home      | Unchecked | Unchecked |
| NA      | NA         | Complete | 95 Home            | Unchecked | Checked   |
| Mexican | NA         | Complete | 58 Home            | Checked   | Unchecked |
| NA      | NA         | Complete | 50 Home            | Checked   | Checked   |
| Other   | Domenican  | Complete | 45 NA              | Unchecked | Unchecked |
| Other   | Domenican  | Complete | 91 Assisted Living | Unchecked | Checked   |
| NA      | NA         | Complete | 51 Home            | Checked   | Checked   |
| NA      | NA         | Complete | 57 Urgent Care     | Unchecked | Unchecked |
| NA      | NA         | Complete | 65 Home            | Unchecked | Unchecked |
| NA      | NA         | Complete | 85 SNF/NH          | Unchecked | Checked   |
| NA      | NA         | Complete | 45 Home            | Unchecked | Checked   |
| Mexican | NA         | Complete | 50 Home            | Checked   | Checked   |
| Other   | unknown    | Complete | 48 NA              | Checked   | Checked   |
| Mexican | NA         | Complete | 28 Home            | Unchecked | Unchecked |
| NA      | NA         | Complete | 56 Home            | Unchecked | Unchecked |
| NA      | NA         | Complete | 76 Home            | Checked   | Checked   |
| NA      | NA         | Complete | 69 Doctor Office   | Checked   | Checked   |
| NA      | NA         | Complete | 46 Group Home      | Checked   | Checked   |
| NA      | NA         | Complete | 49 Home            | Checked   | Checked   |
| Other   | Peruvian   | Complete | 96 Home            | Checked   | Unchecked |
| NA      | NA         | Complete | 67 Urgent Care     | Checked   | Unchecked |
| NA      | NA         | Complete | 65 SNF/NH          | Unchecked | Unchecked |
| NA      | NA         | Complete | 75 Rehabilitatio   | Unchecked | Checked   |
| NA      | NA         | Complete | 58 Doctor Office   | Unchecked | Unchecked |
| NA      | NA         | Complete | 85 Home            | Unchecked | Unchecked |
| NA      | NA         | Complete | 94 SNF/NH          | Unchecked | Checked   |
| NA      | NA         | Complete | 71 Home            | Checked   | Checked   |
| NA      | NA         | Complete | 87 Assisted Living | Unchecked | Checked   |
| NA      | NA         | Complete | 72 Home            | Checked   | Unchecked |
| NA      | NA         | Complete | 73 Home            | Checked   | Unchecked |
| NA      | NA         | Complete | 51 Home            | Unchecked | Unchecked |
| NA      | NA         | Complete | 69 Doctor Office   | Unchecked | Checked   |
| NA      | NA         | Complete | 90 Home            | Unchecked | Unchecked |
| Other   | Euadorian  | Complete | 59 Home            | Unchecked | Unchecked |
| NA      | NA         | Complete | 46 Rehabilitatio   | Unchecked | Unchecked |

|         |            |          |                  |           |           |
|---------|------------|----------|------------------|-----------|-----------|
| Mexican | NA         | Complete | 52 Home          | Checked   | Checked   |
| NA      | NA         | Complete | 85 SNF/NH        | Checked   | Unchecked |
| Other   | Colombian  | Complete | 74 Home          | Checked   | Checked   |
| NA      | NA         | Complete | 76 Home          | Unchecked | Checked   |
| NA      | NA         | Complete | 66 Home          | Unchecked | Checked   |
| NA      | NA         | Complete | 76 Urgent Care   | Unchecked | Unchecked |
| NA      | NA         | Complete | 43 Home          | Checked   | Checked   |
| NA      | NA         | Complete | 57 Home          | Checked   | Checked   |
| Other   | Salvadoran | Complete | 41 Home          | Checked   | Checked   |
| NA      | NA         | Complete | 94 NA            | Unchecked | Unchecked |
| NA      | NA         | Complete | 44 Home          | Checked   | Checked   |
| NA      | NA         | Complete | 89 Home          | Unchecked | Unchecked |
| NA      | NA         | Complete | 79 Hospital Trar | Unchecked | Unchecked |
| NA      | NA         | Complete | 66 Home          | Unchecked | Unchecked |
| NA      | NA         | Complete | 51 Home          | Unchecked | Checked   |
| NA      | NA         | Complete | 97 Home          | Unchecked | Unchecked |
| NA      | NA         | Complete | 80 Home          | Checked   | Unchecked |
| NA      | NA         | NA       | 80 Rehabilitatio | Unchecked | Unchecked |
| NA      | NA         | Complete | 68 Group Home    | Unchecked | Checked   |
| NA      | NA         | Complete | 83 Home          | Unchecked | Unchecked |
| Other   | Peruvian   | Complete | 90 Home          | Unchecked | Unchecked |
| NA      | NA         | Complete | 81 SNF/NH        | Unchecked | Unchecked |
| NA      | NA         | Complete | 93 Home          | Checked   | Unchecked |
| NA      | NA         | Complete | 40 Home          | Unchecked | Unchecked |
| NA      | NA         | Complete | 87 NA            | Unchecked | Checked   |
| NA      | NA         | Complete | 67 Urgent Care   | Checked   | Unchecked |
| NA      | NA         | Complete | 84 NA            | Unchecked | Checked   |
| NA      | NA         | Complete | 60 Home          | Checked   | Unchecked |
| NA      | NA         | Complete | 85 SNF/NH        | Unchecked | Checked   |
| Mexican | NA         | Complete | 48 Home          | Checked   | Unchecked |
| Mexican | NA         | Complete | 50 Home          | Checked   | Checked   |
| NA      | NA         | Complete | 32 Hospital Trar | Checked   | Unchecked |
| NA      | NA         | Complete | 19 Home          | Checked   | Checked   |
| NA      | NA         | Complete | 31 Home          | Unchecked | Unchecked |
| NA      | NA         | Complete | 91 SNF/NH        | Checked   | Unchecked |
| NA      | NA         | Complete | 59 Home          | Unchecked | Checked   |
| NA      | NA         | Complete | 64 Home          | Unchecked | Unchecked |
| NA      | NA         | Complete | 78 SNF/NH        | Unchecked | Unchecked |
| NA      | NA         | Complete | 68 Home          | Checked   | Checked   |
| NA      | NA         | Complete | 84 Home          | Unchecked | Unchecked |
| NA      | NA         | Complete | 60 Home          | Checked   | Checked   |
| NA      | NA         | Complete | 68 Home          | Checked   | Unchecked |
| NA      | NA         | Complete | 58 Home          | Checked   | Unchecked |
| NA      | NA         | Complete | 69 Hospital Trar | Checked   | Checked   |
| NA      | NA         | Complete | 54 Home          | Checked   | Checked   |

|         |           |          |                    |           |           |
|---------|-----------|----------|--------------------|-----------|-----------|
| NA      | NA        | Complete | 88 NA              | Unchecked | Unchecked |
| NA      | NA        | Complete | 85 SNF/NH          | Unchecked | Unchecked |
| NA      | NA        | Complete | 90 SNF/NH          | Unchecked | Unchecked |
| NA      | NA        | Complete | 81 SNF/NH          | Unchecked | Unchecked |
| NA      | NA        | Complete | 79 SNF/NH          | Checked   | Checked   |
| NA      | NA        | Complete | 77 Home            | Checked   | Unchecked |
| NA      | NA        | NA       | 77 Home            | Unchecked | Unchecked |
| NA      | NA        | Complete | 75 Hospital Trar   | Unchecked | Unchecked |
| NA      | NA        | Complete | 58 Home            | Checked   | Unchecked |
| NA      | NA        | Complete | 74 SNF/NH          | Unchecked | Unchecked |
| NA      | NA        | Complete | 50 Home            | Unchecked | Unchecked |
| NA      | NA        | Complete | 93 Home            | Unchecked | Checked   |
| NA      | NA        | Complete | 48 Home            | Checked   | Checked   |
| Other   | peruvian  | Complete | 78 Home            | Unchecked | Checked   |
| Other   | dominican | Complete | 85 Assisted Living | Checked   | Checked   |
| Mexican | NA        | Complete | 42 Home            | Unchecked | Unchecked |
| Other   | colombia  | Complete | 34 Home            | Checked   | Checked   |
| Mexican | NA        | Complete | 33 Home            | Checked   | Unchecked |
| Mexican | NA        | Complete | 66 Home            | Checked   | Checked   |
| NA      | NA        | Complete | 65 Group Home      | Unchecked | Unchecked |
| NA      | NA        | Complete | 63 Home            | Checked   | Unchecked |
| NA      | NA        | Complete | 44 Home            | Unchecked | Unchecked |
| NA      | NA        | Complete | 92 Home            | Checked   | Checked   |
| NA      | NA        | NA       | 92 Home            | Unchecked | Unchecked |
| NA      | NA        | Complete | 41 Home            | Unchecked | Unchecked |
| NA      | NA        | Complete | 79 Home            | Checked   | Checked   |
| NA      | NA        | Complete | 60 Home            | Checked   | Checked   |
| NA      | NA        | Complete | 91 Assisted Living | Checked   | Checked   |
| NA      | NA        | Complete | 49 Home            | Checked   | Checked   |
| NA      | NA        | Complete | 68 Home            | Checked   | Checked   |
| NA      | NA        | Complete | 46 Home            | Checked   | Checked   |
| NA      | NA        | Complete | 49 Home            | Checked   | Checked   |
| Other   | peruvian  | Complete | 52 Home            | Unchecked | Checked   |
| NA      | NA        | Complete | 74 Home            | Checked   | Checked   |
| NA      | NA        | Complete | 67 Home            | Checked   | Checked   |
| NA      | NA        | Complete | 94 SNF/NH          | Unchecked | Checked   |
| NA      | NA        | Complete | 80 Home            | Checked   | Unchecked |
| NA      | NA        | NA       | 80 Home            | Unchecked | Unchecked |
| NA      | NA        | Complete | 69 Home            | Checked   | Checked   |
| NA      | NA        | Complete | 81 Home            | Checked   | Checked   |
| NA      | NA        | Complete | 57 Home            | Unchecked | Checked   |
| NA      | NA        | Complete | 67 Assisted Living | Checked   | Checked   |
| NA      | NA        | Complete | 56 Home            | Checked   | Checked   |
| NA      | NA        | Complete | 65 Group Home      | Checked   | Unchecked |
| NA      | NA        | Complete | 91 SNF/NH          | Checked   | Checked   |

|              |               |          |                    |           |           |
|--------------|---------------|----------|--------------------|-----------|-----------|
| Other        | dominican     | Complete | 55 Home            | Unchecked | Checked   |
| Other        | venezuelan    | Complete | 39 Home            | Checked   | Checked   |
| Other        | peruvian      | Complete | 64 Home            | Unchecked | Checked   |
| NA           | NA            | NA       | 64 Home            | Unchecked | Unchecked |
| NA           | NA            | Complete | 67 Home            | Checked   | Unchecked |
| Puerto Rican | NA            | Complete | 65 Doctor Office   | Checked   | Checked   |
| NA           | NA            | Complete | 49 Home            | Checked   | Unchecked |
| NA           | NA            | Complete | 51 Doctor Office   | Checked   | Checked   |
| Other        | GUATEMALA     | Complete | 58 Urgent Care     | Unchecked | Unchecked |
| Other        | Colombian     | Complete | 54 Doctor Office   | Unchecked | Unchecked |
| Mexican      | NA            | Complete | 60 Home            | Unchecked | Checked   |
| Other        | NA            | Complete | 71 Home            | Unchecked | Unchecked |
| NA           | NA            | Complete | 78 SNF/NH          | Checked   | Checked   |
| Mexican      | NA            | Complete | 59 Home            | Unchecked | Unchecked |
| NA           | NA            | Complete | 49 Home            | Unchecked | Checked   |
| NA           | NA            | Complete | 72 Rehabilitatio   | Unchecked | Unchecked |
| NA           | NA            | NA       | 72 Rehabilitatio   | Unchecked | Unchecked |
| NA           | NA            | Complete | 72 Home            | Checked   | Checked   |
| Other        | latin america | Complete | 35 Home            | Unchecked | Checked   |
| NA           | NA            | Complete | 80 Home            | Checked   | Checked   |
| NA           | NA            | Complete | 94 SNF/NH          | Checked   | Checked   |
| NA           | NA            | Complete | 45 Home            | Checked   | Checked   |
| Other        | peruvian      | Complete | 59 Home            | Checked   | Checked   |
| NA           | NA            | Complete | 81 NA              | Checked   | Checked   |
| NA           | NA            | Complete | 44 Doctor Office   | Checked   | Checked   |
| NA           | NA            | Complete | 75 Doctor Office   | Checked   | Checked   |
| NA           | NA            | Complete | 60 Home            | Checked   | Checked   |
| NA           | NA            | Complete | 67 Home            | Checked   | Checked   |
| NA           | NA            | Complete | 57 Group Home      | Checked   | Unchecked |
| NA           | NA            | Complete | 88 Doctor Office   | Unchecked | Unchecked |
| NA           | NA            | Complete | 62 Home            | Checked   | Checked   |
| NA           | NA            | Complete | 83 SNF/NH          | Checked   | Unchecked |
| NA           | NA            | Complete | 67 Home            | Checked   | Unchecked |
| NA           | NA            | NA       | 67 Home            | Unchecked | Unchecked |
| NA           | NA            | Complete | 84 Home            | Checked   | Unchecked |
| NA           | NA            | Complete | 64 Home            | Unchecked | Checked   |
| Other        | Ecuadorian    | Complete | 49 Home            | Unchecked | Unchecked |
| Mexican      | NA            | Complete | 61 Home            | Checked   | Checked   |
| NA           | NA            | Complete | 91 Home            | Checked   | Checked   |
| NA           | NA            | Complete | 88 Assisted Living | Unchecked | Unchecked |
| NA           | NA            | Complete | 79 Hospital Trar   | Checked   | Checked   |
| NA           | NA            | Complete | 67 SNF/NH          | Unchecked | Unchecked |
| NA           | NA            | Complete | 43 Hospital Trar   | Unchecked | Checked   |
| NA           | NA            | Complete | 55 Home            | Checked   | Checked   |
| Other        | Ecuadorian    | Complete | 45 Home            | Checked   | Unchecked |

|         |             |          |                    |           |           |
|---------|-------------|----------|--------------------|-----------|-----------|
| Other   | Peruvian    | Complete | 56 Home            | Unchecked | Unchecked |
| NA      | NA          | Complete | 76 Home            | Checked   | Unchecked |
| NA      | NA          | NA       | 76 Home            | Unchecked | Unchecked |
| NA      | NA          | Complete | 63 Home            | Checked   | Checked   |
| NA      | NA          | Complete | 87 Home            | Checked   | Checked   |
| NA      | NA          | Complete | 58 Home            | Checked   | Unchecked |
| NA      | NA          | Complete | 69 Home            | Checked   | Checked   |
| NA      | NA          | Complete | 82 SNF/NH          | Checked   | Unchecked |
| NA      | NA          | Complete | 69 Home            | Unchecked | Unchecked |
| NA      | NA          | NA       | 69 Home            | Unchecked | Unchecked |
| Other   | Costa Rican | Complete | 78 Home            | Unchecked | Unchecked |
| NA      | NA          | Complete | 63 Urgent Care     | Checked   | Checked   |
| NA      | NA          | Complete | 51 Home            | Unchecked | Unchecked |
| NA      | NA          | Complete | 40 Home            | Unchecked | Unchecked |
| NA      | NA          | Complete | 62 Hospital Trar   | Unchecked | Unchecked |
| NA      | NA          | Complete | 63 Home            | Unchecked | Checked   |
| NA      | NA          | Complete | 88 SNF/NH          | Unchecked | Unchecked |
| NA      | NA          | Complete | 95 SNF/NH          | Unchecked | Unchecked |
| NA      | NA          | Complete | 56 Urgent Care     | Checked   | Unchecked |
| NA      | NA          | Complete | 89 SNF/NH          | Unchecked | Checked   |
| NA      | NA          | Complete | 81 Home            | Checked   | Checked   |
| NA      | NA          | Complete | 84 Home            | Checked   | Checked   |
| Mexican | NA          | Complete | 36 Home            | Checked   | Checked   |
| Other   | Salvadoran  | Complete | 34 Home            | Checked   | Checked   |
| Other   | Colombian   | Complete | 64 Home            | Unchecked | Checked   |
| Other   | Dominican   | Complete | 62 Home            | Unchecked | Unchecked |
| Other   | Hispanic    | Complete | 80 SNF/NH          | Unchecked | Unchecked |
| NA      | NA          | NA       | 80 SNF/NH          | Unchecked | Unchecked |
| NA      | NA          | Complete | 46 Home            | Unchecked | Unchecked |
| NA      | NA          | Complete | 87 Assisted Living | Checked   | Checked   |
| NA      | NA          | Complete | 92 Assisted Living | Unchecked | Unchecked |
| NA      | NA          | Complete | 88 SNF/NH          | Unchecked | Unchecked |
| NA      | NA          | Complete | 41 SNF/NH          | Unchecked | Unchecked |
| NA      | NA          | Complete | 30 Home            | Checked   | Checked   |
| NA      | NA          | NA       | 31 Home            | Unchecked | Unchecked |
| NA      | NA          | Complete | 89 Home            | Unchecked | Unchecked |
| NA      | NA          | Complete | 54 Home            | Unchecked | Checked   |
| NA      | NA          | Complete | 34 Home            | Checked   | Checked   |
| NA      | NA          | Complete | 79 Home            | Checked   | Checked   |
| NA      | NA          | Complete | 66 NA              | Unchecked | Unchecked |
| NA      | NA          | Complete | 89 SNF/NH          | Unchecked | Checked   |
| NA      | NA          | Complete | 68 Home            | Checked   | Checked   |
| NA      | NA          | Complete | 32 Hospital Trar   | Checked   | Checked   |
| Other   | Peruvian    | Complete | 85 Home            | Unchecked | Unchecked |
| NA      | NA          | Complete | 81 Home            | Unchecked | Checked   |

|       |    |          |                      |           |           |
|-------|----|----------|----------------------|-----------|-----------|
| NA    | NA | Complete | 90 Home              | Checked   | Checked   |
| NA    | NA | Complete | 84 Assisted Living   | Unchecked | Unchecked |
| NA    | NA | Complete | 73 SNF/NH            | Unchecked | Checked   |
| NA    | NA | Complete | 97 Home              | Unchecked | Unchecked |
| NA    | NA | Complete | 79 Hospital Transfer | Unchecked | Unchecked |
| NA    | NA | Complete | 75 Home              | Checked   | Unchecked |
| NA    | NA | NA       | 75 Home              | Unchecked | Unchecked |
| NA    | NA | NA       | 75 Home              | Checked   | Unchecked |
| NA    | NA | Complete | 77 Home              | Unchecked | Unchecked |
| NA    | NA | Complete | 76 Assisted Living   | Checked   | Unchecked |
| NA    | NA | Complete | 87 Home              | Unchecked | Unchecked |
| NA    | NA | Complete | 68 Home              | Checked   | Checked   |
| NA    | NA | NA       | 68 Home              | Unchecked | Unchecked |
| NA    | NA | Complete | 63 Home              | Unchecked | Unchecked |
| NA    | NA | Complete | 85 NA                | Unchecked | Unchecked |
| NA    | NA | Complete | 67 Home              | Checked   | Checked   |
| NA    | NA | Complete | 76 Home              | Unchecked | Unchecked |
| NA    | NA | Complete | 63 Home              | Checked   | Unchecked |
| NA    | NA | Complete | 39 Home              | Unchecked | Unchecked |
| NA    | NA | Complete | 79 Home              | Unchecked | Unchecked |
| NA    | NA | Complete | 92 Assisted Living   | Checked   | Unchecked |
| NA    | NA | Complete | 69 Home              | Unchecked | Checked   |
| NA    | NA | Complete | 55 Home              | Checked   | Unchecked |
| NA    | NA | Complete | 71 Home              | Checked   | Unchecked |
| NA    | NA | Complete | 31 Home              | Checked   | Unchecked |
| NA    | NA | NA       | 31 Home              | Checked   | Checked   |
| NA    | NA | Complete | 92 Assisted Living   | Unchecked | Unchecked |
| NA    | NA | Complete | 69 Home              | Unchecked | Checked   |
| NA    | NA | Complete | 59 Group Home        | Unchecked | Unchecked |
| NA    | NA | Complete | 92 Home              | Checked   | Checked   |
| NA    | NA | Complete | 92 Home              | Unchecked | Unchecked |
| NA    | NA | NA       | 92 SNF/NH            | Unchecked | Unchecked |
| NA    | NA | Complete | 74 Home              | Unchecked | Unchecked |
| NA    | NA | Complete | 54 Home              | Unchecked | Checked   |
| NA    | NA | Complete | 73 Home              | Unchecked | Unchecked |
| NA    | NA | Complete | 74 Home              | Unchecked | Checked   |
| NA    | NA | Complete | 88 Home              | Unchecked | Unchecked |
| NA    | NA | Complete | 43 Home              | Checked   | Unchecked |
| NA    | NA | Complete | 83 Home              | Checked   | Unchecked |
| NA    | NA | Complete | 86 SNF/NH            | Unchecked | Checked   |
| NA    | NA | Complete | 92 Home              | Unchecked | Unchecked |
| NA    | NA | Complete | 82 Home              | Checked   | Unchecked |
| Cuban | NA | Complete | 96 Home              | Checked   | Unchecked |
| NA    | NA | Complete | 64 Home              | Checked   | Checked   |
| NA    | NA | Complete | 68 Group Home        | Unchecked | Checked   |

|              |                |          |                      |           |           |
|--------------|----------------|----------|----------------------|-----------|-----------|
| NA           | NA             | Complete | 79 Home              | Unchecked | Checked   |
| NA           | NA             | Complete | 68 SNF/NH            | Checked   | Checked   |
| NA           | NA             | Complete | 43 Home              | Checked   | Checked   |
| NA           | NA             | Complete | 84 NA                | Unchecked | Checked   |
| NA           | NA             | NA       | 84 SNF/NH            | Unchecked | Unchecked |
| NA           | NA             | Complete | 77 Home              | Checked   | Unchecked |
| NA           | NA             | Complete | 96 Home              | Checked   | Unchecked |
| NA           | NA             | Complete | 94 Home              | Unchecked | Unchecked |
| NA           | NA             | Complete | 68 SNF/NH            | Checked   | Checked   |
| NA           | NA             | Complete | 95 Home              | Unchecked | Unchecked |
| Other        | Peruvian       | Complete | 67 Home              | Checked   | Unchecked |
| Other        | Ecuadorian     | Complete | 61 Home              | Checked   | Checked   |
| NA           | NA             | Complete | 80 SNF/NH            | Unchecked | Unchecked |
| NA           | NA             | Complete | 78 Assisted Living   | Unchecked | Unchecked |
| NA           | NA             | Complete | 52 Home              | Checked   | Unchecked |
| NA           | NA             | Complete | 62 Group Home        | Unchecked | Checked   |
| NA           | NA             | Complete | 75 SNF/NH            | Unchecked | Unchecked |
| NA           | NA             | Complete | 65 Home              | Checked   | Checked   |
| NA           | NA             | Complete | 32 Home              | Unchecked | Checked   |
| NA           | NA             | Complete | 62 Home              | Checked   | Checked   |
| NA           | NA             | Complete | 59 Home              | Unchecked | Unchecked |
| NA           | NA             | Complete | 70 Home              | Unchecked | Unchecked |
| NA           | NA             | Complete | 49 Hospital Transfer | Unchecked | Unchecked |
| NA           | NA             | Complete | 40 Home              | Unchecked | Unchecked |
| Other        | Honduran       | Complete | 89 SNF/NH            | Checked   | Unchecked |
| NA           | NA             | NA       | 89 SNF/NH            | Unchecked | Checked   |
| NA           | NA             | Complete | 80 SNF/NH            | Unchecked | Unchecked |
| NA           | NA             | Complete | 52 SNF/NH            | Unchecked | Unchecked |
| NA           | NA             | Complete | 69 Home              | Unchecked | Unchecked |
| Other        | Guatemalan     | Complete | 49 Home              | Checked   | Checked   |
| Other        | Salvadorian    | Complete | 39 Home              | Checked   | Checked   |
| Other        | Latin American | Complete | 49 Hospital Transfer | Checked   | Checked   |
| NA           | NA             | Complete | 65 Home              | Unchecked | Checked   |
| NA           | NA             | Complete | 39 Home              | Unchecked | Unchecked |
| Puerto Rican | NA             | Complete | 85 Assisted Living   | Unchecked | Checked   |
| NA           | NA             | Complete | 56 Home              | Unchecked | Unchecked |
| NA           | NA             | Complete | 95 Home              | Unchecked | Unchecked |
| NA           | NA             | Complete | 89 SNF/NH            | Checked   | Unchecked |
| NA           | NA             | Complete | 85 SNF/NH            | Unchecked | Unchecked |
| NA           | NA             | NA       | 85 SNF/NH            | Unchecked | Unchecked |
| NA           | NA             | Complete | 68 Other             | Unchecked | Checked   |
| NA           | NA             | NA       | 68 Other             | Unchecked | Unchecked |
| NA           | NA             | Complete | 63 Home              | Checked   | Unchecked |
| NA           | NA             | Complete | 40 Group Home        | Unchecked | Checked   |
| NA           | NA             | Complete | 66 Group Home        | Checked   | Checked   |



|              |            |          |                    |           |           |
|--------------|------------|----------|--------------------|-----------|-----------|
| NA           | NA         | Complete | 78 Home            | Unchecked | Checked   |
| NA           | NA         | Complete | 57 Home            | Checked   | Unchecked |
| NA           | NA         | Complete | 83 SNF/NH          | Checked   | Unchecked |
| NA           | NA         | Complete | 55 Home            | Unchecked | Checked   |
| NA           | NA         | Complete | 81 Home            | Checked   | Checked   |
| NA           | NA         | Complete | 92 Home            | Unchecked | Checked   |
| NA           | NA         | Complete | 82 SNF/NH          | Unchecked | Unchecked |
| NA           | NA         | Complete | 71 Home            | Unchecked | Unchecked |
| NA           | NA         | Complete | 82 Home            | Checked   | Checked   |
| NA           | NA         | Complete | 74 Home            | Checked   | Unchecked |
| NA           | NA         | Complete | 56 NA              | Unchecked | Unchecked |
| NA           | NA         | Complete | 65 Group Home      | Unchecked | Checked   |
| Other        | Ecuadorian | Complete | 76 Home            | Unchecked | Unchecked |
| Other        | Colombian  | Complete | 86 Home            | Checked   | Unchecked |
| NA           | NA         | Complete | 71 Home            | Checked   | Checked   |
| NA           | NA         | Complete | 61 Home            | Unchecked | Unchecked |
| NA           | NA         | Complete | 91 Home            | Unchecked | Unchecked |
| NA           | NA         | Complete | 80 Home            | Unchecked | Unchecked |
| NA           | NA         | Complete | 83 SNF/NH          | Unchecked | Unchecked |
| NA           | NA         | Complete | 42 Home            | Unchecked | Unchecked |
| NA           | NA         | Complete | 84 Assisted Living | Unchecked | Checked   |
| Mexican      | NA         | Complete | 42 Home            | Unchecked | Checked   |
| NA           | NA         | Complete | 50 Home            | Checked   | Checked   |
| NA           | NA         | Complete | 66 Home            | Unchecked | Unchecked |
| NA           | NA         | Complete | 70 Home            | Unchecked | Unchecked |
| NA           | NA         | Complete | 68 Home            | Unchecked | Unchecked |
| NA           | NA         | Complete | 94 Home            | Unchecked | Unchecked |
| NA           | NA         | Complete | 86 SNF/NH          | Checked   | Checked   |
| NA           | NA         | Complete | 95 Home            | Unchecked | Checked   |
| Mexican      | NA         | Complete | 77 Home            | Unchecked | Checked   |
| NA           | NA         | Complete | 84 Home            | Checked   | Checked   |
| NA           | NA         | Complete | 82 Home            | Unchecked | Unchecked |
| Puerto Rican | NA         | Complete | 57 Home            | Checked   | Unchecked |
| NA           | NA         | Complete | 65 Home            | Checked   | Checked   |
| NA           | NA         | Complete | 41 SNF/NH          | Unchecked | Checked   |
| NA           | NA         | Complete | 62 Home            | Checked   | Checked   |
| NA           | NA         | Complete | 88 Home            | Checked   | Checked   |
| Other        | Peruvian   | Complete | 63 Home            | Unchecked | Unchecked |
| NA           | NA         | Complete | 65 Home            | Unchecked | Checked   |
| NA           | NA         | Complete | 55 Home            | Unchecked | Checked   |
| Other        | Peruvian   | Complete | 70 Home            | Checked   | Checked   |
| NA           | NA         | Complete | 81 Home            | Unchecked | Unchecked |
| NA           | NA         | Complete | 75 Home            | Unchecked | Unchecked |
| NA           | NA         | Complete | 94 SNF/NH          | Checked   | Unchecked |
| NA           | NA         | Complete | 54 SNF/NH          | Checked   | Unchecked |

|              |               |          |                    |           |           |
|--------------|---------------|----------|--------------------|-----------|-----------|
| NA           | NA            | Complete | 59 Home            | Checked   | Checked   |
| NA           | NA            | Complete | 88 Home            | Checked   | Unchecked |
| NA           | NA            | Complete | 65 Home            | Checked   | Unchecked |
| Other        | Colombian     | Complete | 44 Home            | Unchecked | Unchecked |
| NA           | NA            | Complete | 70 Home            | Unchecked | Unchecked |
| NA           | NA            | Complete | 81 Home            | Unchecked | Unchecked |
| NA           | NA            | Complete | 49 Home            | Unchecked | Unchecked |
| Puerto Rican | NA            | Complete | 81 SNF/NH          | Unchecked | Unchecked |
| NA           | NA            | Complete | 45 Home            | Checked   | Checked   |
| NA           | NA            | Complete | 101 SNF/NH         | Checked   | Checked   |
| NA           | NA            | Complete | 62 Home            | Unchecked | Unchecked |
| Other        | Salvadoran    | Complete | 63 Home            | Checked   | Checked   |
| NA           | NA            | Complete | 61 Group Home      | Unchecked | Unchecked |
| NA           | NA            | NA       | 61 Group Home      | Unchecked | Checked   |
| NA           | NA            | Complete | 92 SNF/NH          | Unchecked | Unchecked |
| NA           | NA            | Complete | 85 Home            | Unchecked | Unchecked |
| NA           | NA            | Complete | 77 Home            | Checked   | Unchecked |
| NA           | NA            | Complete | 67 Home            | Unchecked | Checked   |
| NA           | NA            | Complete | 69 Home            | Checked   | Checked   |
| NA           | NA            | Complete | 61 NA              | Checked   | Unchecked |
| NA           | NA            | Complete | 38 Home            | Unchecked | Checked   |
| NA           | NA            | Complete | 60 Home            | Checked   | Checked   |
| NA           | NA            | Complete | 71 Home            | Checked   | Unchecked |
| NA           | NA            | Complete | 90 Assisted Living | Unchecked | Unchecked |
| NA           | NA            | Complete | 70 Urgent Care     | Checked   | Unchecked |
| NA           | NA            | Complete | 48 Home            | Checked   | Unchecked |
| NA           | NA            | Complete | 50 Home            | Checked   | Checked   |
| NA           | NA            | Complete | 70 Home            | Unchecked | Checked   |
| NA           | NA            | Complete | 65 Home            | Unchecked | Unchecked |
| NA           | NA            | Complete | 90 SNF/NH          | Unchecked | Unchecked |
| NA           | NA            | NA       | 90 SNF/NH          | Unchecked | Unchecked |
| NA           | NA            | Complete | 64 Home            | Unchecked | Checked   |
| NA           | NA            | Complete | 78 Home            | Unchecked | Unchecked |
| NA           | NA            | Complete | 81 Assisted Living | Unchecked | Unchecked |
| NA           | NA            | Complete | 81 Assisted Living | Checked   | Checked   |
| NA           | NA            | Complete | 64 Home            | Unchecked | Checked   |
| NA           | NA            | NA       | 64 Home            | Checked   | Unchecked |
| NA           | NA            | Complete | 72 Assisted Living | Unchecked | Checked   |
| NA           | NA            | Complete | 63 Rehabilitation  | Unchecked | Unchecked |
| NA           | NA            | Complete | 73 Home            | Unchecked | Checked   |
| Mexican      | NA            | Complete | 48 Urgent Care     | Checked   | Unchecked |
| Puerto Rican | NA            | Complete | 46 Home            | Unchecked | Unchecked |
| NA           | NA            | Complete | 89 Home            | Checked   | Checked   |
| NA           | NA            | NA       | 89 Home            | Unchecked | Unchecked |
| Other        | other hispani | Complete | 32 Hospital Trar   | Checked   | Checked   |

|              |            |          |                      |           |           |
|--------------|------------|----------|----------------------|-----------|-----------|
| NA           | NA         | Complete | 84 SNF/NH            | Unchecked | Checked   |
| NA           | NA         | Complete | 57 Home              | Checked   | Checked   |
| NA           | NA         | NA       | 57 Home              | Unchecked | Unchecked |
| NA           | NA         | Complete | 93 Assisted Living   | Unchecked | Unchecked |
| NA           | NA         | Complete | 90 Home              | Checked   | Checked   |
| NA           | NA         | Complete | 91 Home              | Checked   | Checked   |
| Mexican      | NA         | Complete | 65 Home              | Unchecked | Checked   |
| Mexican      | NA         | Complete | 78 Home              | Unchecked | Unchecked |
| NA           | NA         | Complete | 51 Home              | Unchecked | Checked   |
| NA           | NA         | Complete | 76 Urgent Care       | Checked   | Unchecked |
| NA           | NA         | Complete | 81 Home              | Unchecked | Checked   |
| NA           | NA         | Complete | 51 Home              | Unchecked | Unchecked |
| NA           | NA         | Complete | 26 Home              | Unchecked | Unchecked |
| NA           | NA         | Complete | 54 Home              | Unchecked | Unchecked |
| NA           | NA         | Complete | 95 Rehabilitation    | Unchecked | Unchecked |
| NA           | NA         | Complete | 75 SNF/NH            | Unchecked | Unchecked |
| NA           | NA         | Complete | 88 Assisted Living   | Unchecked | Unchecked |
| NA           | NA         | Complete | 65 Home              | Checked   | Checked   |
| NA           | NA         | Complete | 36 Home              | Unchecked | Unchecked |
| NA           | NA         | Complete | 65 Home              | Checked   | Unchecked |
| Other        | Dominican  | Complete | 43 Home              | Unchecked | Unchecked |
| NA           | NA         | Complete | 80 Hospital Transfer | Unchecked | Unchecked |
| NA           | NA         | Complete | 63 Home              | Checked   | Checked   |
| NA           | NA         | Complete | 64 Home              | Unchecked | Unchecked |
| NA           | NA         | Complete | 77 Home              | Unchecked | Unchecked |
| NA           | NA         | Complete | 26 Home              | Unchecked | Unchecked |
| NA           | NA         | Complete | 89 Home              | Unchecked | Unchecked |
| NA           | NA         | Complete | 62 Home              | Checked   | Checked   |
| NA           | NA         | Complete | 84 Assisted Living   | Unchecked | Checked   |
| Mexican      | NA         | Complete | 38 Other             | Checked   | Unchecked |
| NA           | NA         | Complete | 77 Home              | Checked   | Unchecked |
| Puerto Rican | NA         | Complete | 78 Home              | Checked   | Checked   |
| Other        | Peruvian   | Complete | 60 Home              | Checked   | Checked   |
| Other        | Salvadoran | Complete | 70 NA                | Unchecked | Unchecked |
| Other        | Peruvian   | Complete | 61 Home              | Checked   | Unchecked |
| Mexican      | NA         | Complete | 47 Home              | Unchecked | Unchecked |
| Mexican      | NA         | Complete | 42 Home              | Checked   | Checked   |
| Mexican      | NA         | Complete | 40 Home              | Checked   | Unchecked |
| Mexican      | NA         | Complete | 34 Home              | Unchecked | Unchecked |
| Mexican      | NA         | Complete | 56 Home              | Checked   | Unchecked |
| Other        | Peruvian   | Complete | 72 Urgent Care       | Unchecked | Unchecked |
| Other        | Ecuadorian | Complete | 62 Home              | Unchecked | Unchecked |
| Other        | Salvadoran | Complete | 51 Home              | Unchecked | Unchecked |
| NA           | NA         | Complete | 68 Home              | Checked   | Unchecked |
| NA           | NA         | Complete | 73 Home              | Unchecked | Unchecked |

|              |            |          |                  |           |           |
|--------------|------------|----------|------------------|-----------|-----------|
| Other        | Ecuadorian | Complete | 70 Home          | Unchecked | Unchecked |
| NA           | NA         | Complete | 94 Home          | Unchecked | Unchecked |
| NA           | NA         | Complete | 85 Doctor Office | Checked   | Checked   |
| NA           | NA         | Complete | 66 Home          | Unchecked | Unchecked |
| Other        | Ecuadorian | Complete | 59 Home          | Unchecked | Unchecked |
| NA           | NA         | Complete | 96 Home          | Unchecked | Unchecked |
| Mexican      | NA         | Complete | 71 Home          | Unchecked | Unchecked |
| Mexican      | NA         | Complete | 39 Home          | Checked   | Checked   |
| Other        | Unknown ot | Complete | 47 Home          | Checked   | Checked   |
| NA           | NA         | Complete | 85 SNF/NH        | Unchecked | Unchecked |
| NA           | NA         | Complete | 58 Home          | Checked   | Unchecked |
| NA           | NA         | Complete | 67 Home          | Checked   | Unchecked |
| NA           | NA         | NA       | 67 Rehabilitatio | Unchecked | Unchecked |
| NA           | NA         | Complete | 56 Home          | Checked   | Unchecked |
| NA           | NA         | Complete | 47 Home          | Checked   | Checked   |
| NA           | NA         | Complete | 59 Home          | Checked   | Checked   |
| NA           | NA         | Complete | 76 Home          | Unchecked | Checked   |
| NA           | NA         | Complete | 78 Home          | Unchecked | Unchecked |
| NA           | NA         | Complete | 49 Hospital Trar | Unchecked | Unchecked |
| NA           | NA         | Complete | 53 Home          | Checked   | Unchecked |
| NA           | NA         | Complete | 53 Home          | Unchecked | Unchecked |
| Puerto Rican | NA         | Complete | 31 Home          | Unchecked | Unchecked |
| Mexican      | NA         | Complete | 53 Home          | Checked   | Checked   |
| NA           | NA         | Complete | 44 Home          | Unchecked | Unchecked |
| NA           | NA         | Complete | 78 Home          | Unchecked | Unchecked |
| Other        | Ecuadorian | Complete | 71 Urgent Care   | Unchecked | Checked   |
| NA           | NA         | Complete | 73 Other         | Checked   | Checked   |
| Other        | Peruvian   | Complete | 60 Home          | Checked   | Checked   |
| NA           | NA         | Complete | 93 Home          | Unchecked | Unchecked |
| NA           | NA         | Complete | 54 Home          | Checked   | Checked   |
| NA           | NA         | Complete | 63 Home          | Checked   | Unchecked |
| NA           | NA         | Complete | 87 SNF/NH        | Unchecked | Unchecked |
| Mexican      | NA         | Complete | 44 Home          | Unchecked | Unchecked |
| Other        | Dominican  | Complete | 56 Home          | Unchecked | Unchecked |
| NA           | NA         | Complete | 60 Home          | Unchecked | Unchecked |
| NA           | NA         | Complete | 67 NA            | Unchecked | Unchecked |
| NA           | NA         | Complete | 60 Home          | Unchecked | Unchecked |
| NA           | NA         | Complete | 63 Home          | Unchecked | Unchecked |
| NA           | NA         | Complete | 77 Home          | Unchecked | Unchecked |
| NA           | NA         | Complete | 67 SNF/NH        | Unchecked | Checked   |
| NA           | NA         | NA       | 67 SNF/NH        | Unchecked | Unchecked |
| NA           | NA         | Complete | 55 Home          | Unchecked | Unchecked |
| NA           | NA         | Complete | 86 SNF/NH        | Unchecked | Unchecked |
| NA           | NA         | Complete | 85 Home          | Unchecked | Unchecked |
| NA           | NA         | Complete | 94 Home          | Unchecked | Unchecked |

|              |            |          |                    |           |           |
|--------------|------------|----------|--------------------|-----------|-----------|
| NA           | NA         | Complete | 53 Home            | Checked   | Checked   |
| NA           | NA         | Complete | 83 Home            | Checked   | Unchecked |
| Other        | Ecuadorian | Complete | 27 Home            | Unchecked | Unchecked |
| NA           | NA         | Complete | 38 Home            | Unchecked | Checked   |
| Mexican      | NA         | Complete | 79 Home            | Unchecked | Unchecked |
| NA           | NA         | NA       | 79 Home            | Unchecked | Checked   |
| NA           | NA         | NA       | 79 Home            | Unchecked | Unchecked |
| Other        | Ecuadorian | Complete | 45 Home            | Unchecked | Checked   |
| Mexican      | NA         | Complete | 64 Home            | Unchecked | Unchecked |
| NA           | NA         | Complete | 74 Home            | Unchecked | Checked   |
| NA           | NA         | Complete | 66 Other           | Unchecked | Unchecked |
| Other        | Peruvian   | Complete | 42 Home            | Unchecked | Unchecked |
| NA           | NA         | Complete | 56 Rehabilitatio   | Unchecked | Unchecked |
| NA           | NA         | Complete | 72 Doctor Office   | Unchecked | Unchecked |
| NA           | NA         | Complete | 78 Home            | Unchecked | Unchecked |
| Other        | Salvadoran | Complete | 21 Home            | Unchecked | Unchecked |
| NA           | NA         | Complete | 42 Home            | Checked   | Unchecked |
| Other        | Ecuadorian | Complete | 34 Home            | Unchecked | Unchecked |
| Puerto Rican | NA         | Complete | 95 SNF/NH          | Unchecked | Unchecked |
| Puerto Rican | NA         | Complete | 59 NA              | Checked   | Unchecked |
| NA           | NA         | Complete | 85 Home            | Unchecked | Unchecked |
| NA           | NA         | Complete | 80 Group Home      | Checked   | Unchecked |
| Other        | Peruvian   | Complete | 54 Home            | Checked   | Unchecked |
| NA           | NA         | Complete | 65 Urgent Care     | Checked   | Unchecked |
| NA           | NA         | Complete | 70 Home            | Checked   | Unchecked |
| NA           | NA         | NA       | 70 Home            | Unchecked | Checked   |
| NA           | NA         | Complete | 75 Home            | Checked   | Unchecked |
| NA           | NA         | Complete | 57 Doctor Office   | Unchecked | Unchecked |
| NA           | NA         | Complete | 84 Home            | Checked   | Checked   |
| NA           | NA         | Complete | 22 Group Home      | Checked   | Unchecked |
| NA           | NA         | Complete | 86 Assisted Living | Unchecked | Unchecked |
| NA           | NA         | Complete | 43 Hospital Trans  | Checked   | Checked   |
| NA           | NA         | Complete | 85 Home            | Unchecked | Unchecked |
| Puerto Rican | NA         | Complete | 83 Home            | Unchecked | Unchecked |
| NA           | NA         | Complete | 19 Doctor Office   | Checked   | Checked   |
| Other        | Ecuadorian | Complete | 62 Home            | Unchecked | Checked   |
| Other        | Ecuadorian | Complete | 54 Home            | Unchecked | Checked   |
| Other        | Venezuelan | Complete | 72 Home            | Unchecked | Unchecked |
| Mexican      | NA         | Complete | 38 NA              | Checked   | Unchecked |
| NA           | NA         | Complete | 50 Home            | Checked   | Checked   |
| NA           | NA         | Complete | 91 Doctor Office   | Checked   | Checked   |
| NA           | NA         | Complete | 90 Home            | Checked   | Checked   |
| NA           | NA         | NA       | 90 SNF/NH          | Unchecked | Unchecked |
| Other        | Peruvian   | Complete | 74 Home            | Unchecked | Checked   |
| NA           | NA         | Complete | 52 Home            | Checked   | Unchecked |

|              |            |          |                  |           |           |
|--------------|------------|----------|------------------|-----------|-----------|
| NA           | NA         | Complete | 48 Home          | Checked   | Unchecked |
| NA           | NA         | Complete | 61 Home          | Unchecked | Unchecked |
| NA           | NA         | Complete | 63 Doctor Office | Checked   | Unchecked |
| NA           | NA         | Complete | 57 Home          | Checked   | Checked   |
| NA           | NA         | Complete | 91 SNF/NH        | Unchecked | Unchecked |
| NA           | NA         | Complete | 80 Rehabilitatio | Unchecked | Unchecked |
| NA           | NA         | Complete | 86 Home          | Unchecked | Checked   |
| Other        | Colombian  | Complete | 60 Home          | Unchecked | Unchecked |
| Puerto Rican | NA         | Complete | 79 Home          | Unchecked | Unchecked |
| NA           | NA         | Complete | 45 Urgent Care   | Unchecked | Checked   |
| Mexican      | NA         | Complete | 59 Home          | Unchecked | Unchecked |
| NA           | NA         | Complete | 76 Other         | Unchecked | Checked   |
| NA           | NA         | NA       | 76 Rehabilitatio | Unchecked | Unchecked |
| NA           | NA         | Complete | 47 Home          | Unchecked | Unchecked |
| NA           | NA         | Complete | 73 Home          | Checked   | Unchecked |
| Other        | ECuadorian | Complete | 45 Home          | Checked   | Checked   |
| NA           | NA         | NA       | 45 Home          | Unchecked | Unchecked |
| NA           | NA         | Complete | 90 Assisted Livi | Unchecked | Checked   |
| NA           | NA         | Complete | 90 Urgent Care   | Unchecked | Unchecked |
| NA           | NA         | Complete | 57 Home          | Unchecked | Unchecked |
| NA           | NA         | NA       | 57 Home          | Unchecked | Unchecked |
| NA           | NA         | Complete | 65 Home          | Unchecked | Unchecked |
| NA           | NA         | Complete | 92 Assisted Livi | Unchecked | Checked   |
| NA           | NA         | Complete | 59 Home          | Unchecked | Unchecked |
| NA           | NA         | Complete | 28 Home          | Unchecked | Unchecked |
| NA           | NA         | Complete | 85 Home          | Checked   | Unchecked |
| NA           | NA         | Complete | 92 NA            | Unchecked | Unchecked |
| NA           | NA         | Complete | 65 Home          | Unchecked | Unchecked |
| NA           | NA         | NA       | 65 Home          | Unchecked | Unchecked |
| NA           | NA         | Complete | 77 Home          | Unchecked | Checked   |
| NA           | NA         | NA       | 77 Home          | Unchecked | Unchecked |
| NA           | NA         | Complete | 86 Assisted Livi | Checked   | Unchecked |
| Other        | Uruguyan   | Complete | 61 Doctor Office | Unchecked | Unchecked |
| NA           | NA         | Complete | 49 Home          | Checked   | Unchecked |
| NA           | NA         | Complete | 85 Assisted Livi | Unchecked | Checked   |
| NA           | NA         | Complete | 78 Home          | Unchecked | Unchecked |
| NA           | NA         | Complete | 81 Assisted Livi | Checked   | Unchecked |
| NA           | NA         | Complete | 66 Home          | Unchecked | Unchecked |
| Other        | Ecuadorian | Complete | 53 Home          | Unchecked | Checked   |
| Other        | Ecuadorian | Complete | 75 Home          | Unchecked | Unchecked |
| NA           | NA         | Complete | 76 Home          | Checked   | Checked   |
| NA           | NA         | Complete | 84 SNF/NH        | Unchecked | Unchecked |
| NA           | NA         | NA       | 84 Assisted Livi | Unchecked | Unchecked |
| NA           | NA         | Complete | 92 Assisted Livi | Unchecked | Unchecked |
| NA           | NA         | Complete | 52 Doctor Office | Unchecked | Unchecked |

|              |               |          |                    |           |           |
|--------------|---------------|----------|--------------------|-----------|-----------|
| Other        | other hispani | Complete | 17 Home            | Unchecked | Unchecked |
| Other        | Ecuadorian    | Complete | 64 Doctor Office   | Checked   | Unchecked |
| Other        | Colombian     | Complete | 86 Home            | Checked   | Checked   |
| NA           | NA            | Complete | 66 Home            | Unchecked | Unchecked |
| NA           | NA            | Complete | 57 Home            | Unchecked | Unchecked |
| NA           | NA            | Complete | 93 Assisted Living | Unchecked | Checked   |
| NA           | NA            | Complete | 76 Home            | Checked   | Checked   |
| Other        | Guatemalan    | Complete | 50 Rehabilitatio   | Unchecked | Unchecked |
| Other        | Peruvian      | Complete | 62 Home            | Unchecked | Unchecked |
| NA           | NA            | Complete | 80 SNF/NH          | Unchecked | Unchecked |
| NA           | NA            | Complete | 69 Home            | Unchecked | Unchecked |
| NA           | NA            | Complete | 63 Home            | Checked   | Checked   |
| Mexican      | NA            | Complete | 36 Home            | Checked   | Checked   |
| Other        | Ecuadorian    | Complete | 77 Home            | Checked   | Checked   |
| NA           | NA            | NA       | 77 Home            | Unchecked | Unchecked |
| Other        | Peruvian      | Complete | 54 Home            | Checked   | Checked   |
| Puerto Rican | NA            | Complete | 76 Home            | Checked   | Checked   |
| Puerto Rican | NA            | Complete | 46 Home            | Checked   | Checked   |
| NA           | NA            | Complete | 62 Home            | Unchecked | Unchecked |
| NA           | NA            | Complete | 70 Home            | Unchecked | Checked   |
| NA           | NA            | Complete | 60 Urgent Care     | Checked   | Checked   |
| NA           | NA            | Complete | 50 Home            | Unchecked | Unchecked |
| NA           | NA            | Complete | 85 Home            | Unchecked | Checked   |
| NA           | NA            | Complete | 76 Assisted Living | Unchecked | Unchecked |
| NA           | NA            | Complete | 77 SNF/NH          | Checked   | Unchecked |
| NA           | NA            | Complete | 94 Home            | Unchecked | Unchecked |
| Other        | Salvadoran    | Complete | 73 Home            | Checked   | Checked   |
| NA           | NA            | Complete | 94 Assisted Living | Unchecked | Unchecked |
| Puerto Rican | NA            | Complete | 79 Home            | Unchecked | Unchecked |
| Other        | Guatemalan    | Complete | 62 Home            | Unchecked | Unchecked |
| NA           | NA            | Complete | 56 Hospital Trar   | Unchecked | Unchecked |
| Puerto Rican | NA            | Complete | 76 Home            | Unchecked | Checked   |
| NA           | NA            | Complete | 56 Home            | Checked   | Unchecked |
| NA           | NA            | Complete | 86 Assisted Living | Unchecked | Checked   |
| Other        | Chilean       | Complete | 63 Home            | Checked   | Checked   |
| NA           | NA            | Complete | 74 Home            | Unchecked | Unchecked |
| Other        | Salvadoran    | Complete | 85 Home            | Checked   | Checked   |
| NA           | NA            | Complete | 32 Home            | Unchecked | Checked   |
| NA           | NA            | Complete | 37 Home            | Unchecked | Checked   |
| NA           | NA            | Complete | 37 Home            | Unchecked | Unchecked |
| NA           | NA            | Complete | 87 Home            | Unchecked | Checked   |
| NA           | NA            | Complete | 84 SNF/NH          | Checked   | Checked   |
| NA           | NA            | Complete | 38 Home            | Checked   | Checked   |
| NA           | NA            | Complete | 88 SNF/NH          | Unchecked | Unchecked |
| NA           | NA            | Complete | 91 Home            | Checked   | Checked   |

|              |            |          |                     |           |           |
|--------------|------------|----------|---------------------|-----------|-----------|
| NA           | NA         | Complete | 97 Home             | Checked   | Checked   |
| NA           | NA         | Complete | 78 Home             | Unchecked | Checked   |
| NA           | NA         | Complete | 61 Home             | Checked   | Checked   |
| Mexican      | NA         | Complete | 33 Home             | Checked   | Checked   |
| Mexican      | NA         | Complete | 61 Home             | Checked   | Checked   |
| NA           | NA         | Complete | 28 Home             | Checked   | Checked   |
| Other        | Salvadoran | Complete | 92 Home             | Checked   | Unchecked |
| Other        | Colombian  | Complete | 61 Home             | Checked   | Checked   |
| Mexican      | NA         | Complete | 55 Home             | Checked   | Checked   |
| NA           | NA         | NA       | 56 Home             | Unchecked | Unchecked |
| Other        | Bolivian   | Complete | 61 Home             | Unchecked | Unchecked |
| Other        | Dominican  | Complete | 35 Home             | Unchecked | Unchecked |
| NA           | NA         | Complete | 57 Home             | Checked   | Checked   |
| Other        | Peruvian   | Complete | 40 Home             | Unchecked | Unchecked |
| Mexican      | NA         | Complete | 46 Home             | Checked   | Checked   |
| Other        | Peruvian   | Complete | 48 Home             | Checked   | Checked   |
| NA           | NA         | Complete | 26 Hospital Trar    | Unchecked | Unchecked |
| Mexican      | NA         | Complete | 60 Doctor Office    | Checked   | Checked   |
| NA           | NA         | Complete | 89 SNF/NH           | Checked   | Checked   |
| NA           | NA         | Complete | 46 Home             | Unchecked | Checked   |
| Mexican      | NA         | Complete | 66 Home             | Checked   | Checked   |
| NA           | NA         | Complete | 49 Home             | Checked   | Checked   |
| Other        | Peruvian   | Complete | 49 Home             | Checked   | Checked   |
| Puerto Rican | NA         | Complete | 63 SNF/NH           | Checked   | Unchecked |
| Mexican      | NA         | Complete | 51 NA               | Checked   | Checked   |
| NA           | NA         | Complete | 72 Assisted Living  | Unchecked | Unchecked |
| NA           | NA         | Complete | 88 Home             | Checked   | Unchecked |
| NA           | NA         | Complete | 104 Assisted Living | Checked   | Unchecked |
| NA           | NA         | Complete | 69 Home             | Checked   | Unchecked |
| NA           | NA         | Complete | 55 Home             | Checked   | Checked   |
| Other        | Peruvian   | Complete | 29 Home             | Unchecked | Checked   |
| NA           | NA         | Complete | 77 Home             | Checked   | Checked   |
| NA           | NA         | NA       | 77 Rehabilitatio    | Unchecked | Unchecked |
| Other        | Dominican  | Complete | 67 Home             | Checked   | Checked   |
| Mexican      | NA         | Complete | 56 NA               | Checked   | Checked   |
| Mexican      | NA         | Complete | 59 Home             | Checked   | Unchecked |
| NA           | NA         | Complete | 71 Home             | Checked   | Checked   |
| NA           | NA         | Complete | 92 Assisted Living  | Checked   | Unchecked |
| NA           | NA         | Complete | 48 Home             | Checked   | Checked   |
| Other        | Peruvian   | Complete | 23 Home             | Checked   | Checked   |
| NA           | NA         | Complete | 68 Home             | Checked   | Unchecked |
| NA           | NA         | Complete | 83 Doctor Office    | Unchecked | Unchecked |
| Mexican      | NA         | Complete | 62 Home             | Checked   | Checked   |
| NA           | NA         | Complete | 65 NA               | Unchecked | Unchecked |
| Other        | Peruvian   | Complete | 50 Doctor Office    | Checked   | Checked   |



|         |           |          |                  |           |           |
|---------|-----------|----------|------------------|-----------|-----------|
| Mexican | NA        | Complete | 23 Home          | Checked   | Checked   |
| Other   | Peruvian  | Complete | 44 Home          | Unchecked | Unchecked |
| Other   | Peruvian  | Complete | 58 Home          | Unchecked | Unchecked |
| NA      | NA        | Complete | 45 Home          | Checked   | Checked   |
| NA      | NA        | NA       | 45 Home          | Checked   | Checked   |
| NA      | NA        | Complete | 75 Home          | Checked   | Unchecked |
| NA      | NA        | Complete | 67 Group Home    | Unchecked | Unchecked |
| NA      | NA        | Complete | 32 Hospital Trar | Unchecked | Unchecked |
| Other   | Colombian | Complete | 47 Home          | Unchecked | Unchecked |
| NA      | NA        | Complete | 79 SNF/NH        | Checked   | Checked   |
| NA      | NA        | Complete | 53 Home          | Checked   | Checked   |
| NA      | NA        | Complete | 35 Home          | Unchecked | Checked   |
| NA      | NA        | Complete | 46 Hospital Trar | Unchecked | Unchecked |
| NA      | NA        | Complete | 65 Rehabilitatio | Unchecked | Unchecked |
| NA      | NA        | Complete | 37 NA            | Checked   | Checked   |
| NA      | NA        | Complete | 74 Rehabilitatio | Unchecked | Unchecked |
| NA      | NA        | Complete | 86 Home          | Unchecked | Unchecked |
| NA      | NA        | Complete | 46 Home          | Checked   | Checked   |
| NA      | NA        | Complete | 86 SNF/NH        | Unchecked | Unchecked |
| NA      | NA        | Complete | 49 Home          | Unchecked | Unchecked |
| NA      | NA        | Complete | 85 Home          | Unchecked | Unchecked |
| NA      | NA        | NA       | 85 SNF/NH        | Unchecked | Unchecked |
| NA      | NA        | Complete | 81 SNF/NH        | Unchecked | Unchecked |
| NA      | NA        | Complete | 37 Home          | Unchecked | Unchecked |
| NA      | NA        | Complete | 73 Home          | Checked   | Unchecked |
| NA      | NA        | Complete | 76 Home          | Checked   | Unchecked |
| NA      | NA        | Complete | 55 Home          | Unchecked | Unchecked |
| NA      | NA        | Complete | 81 Home          | Checked   | Unchecked |
| NA      | NA        | Complete | 82 SNF/NH        | Checked   | Checked   |
| NA      | NA        | Complete | 62 NA            | Unchecked | Unchecked |
| NA      | NA        | NA       | 62 SNF/NH        | Unchecked | Unchecked |
| NA      | NA        | Complete | 78 Home          | Unchecked | Unchecked |
| NA      | NA        | Complete | 73 Home          | Unchecked | Unchecked |
| NA      | NA        | Complete | 70 Urgent Care   | Checked   | Unchecked |
| NA      | NA        | Complete | 21 Home          | Unchecked | Unchecked |
| NA      | NA        | Complete | 94 SNF/NH        | Unchecked | Unchecked |
| NA      | NA        | Complete | 55 SNF/NH        | Unchecked | Checked   |
| NA      | NA        | Complete | 59 Urgent Care   | Checked   | Checked   |
| NA      | NA        | Complete | 90 SNF/NH        | Unchecked | Unchecked |
| Mexican | NA        | Complete | 34 Home          | Checked   | Checked   |
| NA      | NA        | Complete | 63 Other         | Unchecked | Unchecked |
| Other   | Brasilian | Complete | 54 Home          | Checked   | Checked   |
| NA      | NA        | Complete | 53 Home          | Checked   | Unchecked |
| NA      | NA        | Complete | 48 Doctor Office | Checked   | Checked   |
| NA      | NA        | Complete | 64 Home          | Checked   | Checked   |

|              |           |          |                      |           |           |
|--------------|-----------|----------|----------------------|-----------|-----------|
| NA           | NA        | Complete | 72 SNF/NH            | Unchecked | Unchecked |
| Other        | Colombian | Complete | 73 Home              | Checked   | Checked   |
| Puerto Rican | NA        | Complete | 71 Home              | Checked   | Checked   |
| Mexican      | NA        | Complete | 34 Home              | Checked   | Checked   |
| NA           | NA        | Complete | 77 Home              | Unchecked | Unchecked |
| NA           | NA        | Complete | 78 Home              | Checked   | Checked   |
| NA           | NA        | Complete | 58 Home              | Checked   | Checked   |
| NA           | NA        | Complete | 61 SNF/NH            | Checked   | Checked   |
| NA           | NA        | Complete | 82 Assisted Living   | Unchecked | Unchecked |
| NA           | NA        | Complete | 93 Assisted Living   | Checked   | Unchecked |
| NA           | NA        | NA       | 93 Assisted Living   | Unchecked | Unchecked |
| NA           | NA        | Complete | 70 Home              | Checked   | Checked   |
| NA           | NA        | NA       | 70 Home              | Checked   | Checked   |
| NA           | NA        | Complete | 55 Home              | Checked   | Checked   |
| NA           | NA        | Complete | 52 Rehabilitation    | Unchecked | Unchecked |
| NA           | NA        | Complete | 58 Hospital Transfer | Unchecked | Checked   |
| NA           | NA        | Complete | 64 Hospital Transfer | Unchecked | Unchecked |
| NA           | NA        | Complete | 94 Assisted Living   | Checked   | Unchecked |
| NA           | NA        | Complete | 78 SNF/NH            | Unchecked | Checked   |
| NA           | NA        | Complete | 77 SNF/NH            | Unchecked | Checked   |
| NA           | NA        | Complete | 84 SNF/NH            | Checked   | Unchecked |
| NA           | NA        | Complete | 56 Home              | Checked   | Unchecked |
| NA           | NA        | Complete | 46 Hospital Transfer | Unchecked | Unchecked |
| Other        | Peruvian  | Complete | 52 Home              | Checked   | Checked   |
| NA           | NA        | Complete | 92 Home              | Unchecked | Unchecked |
| NA           | NA        | NA       | 92 Home              | Checked   | Checked   |
| Other        | Dominican | Complete | 78 Home              | Checked   | Checked   |
| NA           | NA        | Complete | 93 SNF/NH            | Unchecked | Unchecked |
| NA           | NA        | Complete | 67 Home              | Unchecked | Checked   |
| NA           | NA        | Complete | 73 SNF/NH            | Unchecked | Unchecked |
| NA           | NA        | Complete | 24 Home              | Unchecked | Unchecked |
| NA           | NA        | Complete | 71 SNF/NH            | Unchecked | Checked   |
| NA           | NA        | Complete | 89 Home              | Checked   | Unchecked |
| NA           | NA        | Complete | 61 Home              | Checked   | Checked   |
| NA           | NA        | Complete | 88 Assisted Living   | Unchecked | Unchecked |
| NA           | NA        | Complete | 76 Home              | Unchecked | Checked   |
| NA           | NA        | NA       | 76 Home              | Unchecked | Unchecked |
| NA           | NA        | Complete | 90 Assisted Living   | Checked   | Checked   |
| Other        | NA        | Complete | 52 Home              | Checked   | Checked   |
| Other        | Peruvian  | Complete | 74 Home              | Checked   | Checked   |
| NA           | NA        | Complete | 62 Home              | Checked   | Checked   |
| NA           | NA        | Complete | 58 Home              | Checked   | Checked   |
| NA           | NA        | Complete | 38 Home              | Unchecked | Unchecked |
| NA           | NA        | Complete | 55 Home              | Unchecked | Unchecked |
| NA           | NA        | Complete | 71 Home              | Unchecked | Checked   |

|         |          |          |                  |           |           |
|---------|----------|----------|------------------|-----------|-----------|
| NA      | NA       | Complete | 67 Home          | Checked   | Checked   |
| NA      | NA       | Complete | 67 Home          | Unchecked | Unchecked |
| NA      | NA       | Complete | 96 Hospital Trar | Unchecked | Unchecked |
| NA      | NA       | Complete | 35 Home          | Unchecked | Checked   |
| NA      | NA       | Complete | 48 Home          | Checked   | Checked   |
| NA      | NA       | Complete | 49 Home          | Checked   | Checked   |
| NA      | NA       | Complete | 76 Home          | Unchecked | Unchecked |
| NA      | NA       | Complete | 78 Rehabilitatio | Checked   | Unchecked |
| NA      | NA       | Complete | 60 Home          | Unchecked | Checked   |
| NA      | NA       | Complete | 68 SNF/NH        | Checked   | Checked   |
| NA      | NA       | Complete | 43 Home          | Checked   | Checked   |
| NA      | NA       | Complete | 92 Home          | Checked   | Checked   |
| NA      | NA       | Complete | 67 SNF/NH        | Checked   | Checked   |
| NA      | NA       | Complete | 88 Home          | Checked   | Unchecked |
| NA      | NA       | Complete | 83 Home          | Checked   | Checked   |
| NA      | NA       | Complete | 63 Home          | Unchecked | Checked   |
| Other   | Peruvian | Complete | 72 Home          | Unchecked | Checked   |
| NA      | NA       | Complete | 73 Home          | Checked   | Checked   |
| NA      | NA       | Complete | 66 Home          | Checked   | Unchecked |
| NA      | NA       | Complete | 68 Home          | Checked   | Checked   |
| NA      | NA       | Complete | 75 Home          | Checked   | Checked   |
| NA      | NA       | Complete | 54 Home          | Checked   | Checked   |
| NA      | NA       | Complete | 46 Hospital Trar | Checked   | Checked   |
| Other   | NA       | Complete | 47 Home          | Checked   | Checked   |
| NA      | NA       | Complete | 84 SNF/NH        | Unchecked | Unchecked |
| NA      | NA       | Complete | 69 Home          | Checked   | Checked   |
| NA      | NA       | Complete | 82 SNF/NH        | Unchecked | Checked   |
| Other   | Peruvian | Complete | 49 Home          | Checked   | Checked   |
| Mexican | NA       | Complete | 53 Home          | Checked   | Unchecked |
| NA      | NA       | Complete | 83 Home          | Checked   | Unchecked |
| NA      | NA       | Complete | 66 Home          | Checked   | Checked   |
| NA      | NA       | Complete | 63 Home          | Checked   | Checked   |
| NA      | NA       | Complete | 61 Home          | Unchecked | Unchecked |
| Other   | Peruvian | Complete | 62 Home          | Checked   | Checked   |
| NA      | NA       | Complete | 82 Home          | Checked   | Unchecked |
| NA      | NA       | Complete | 78 Home          | Checked   | Unchecked |
| NA      | NA       | Complete | 62 Assisted Livi | Unchecked | Checked   |
| NA      | NA       | Complete | 61 Group Home    | Checked   | Checked   |
| NA      | NA       | Complete | 55 Home          | Checked   | Checked   |
| NA      | NA       | Complete | 63 Home          | Checked   | Unchecked |
| NA      | NA       | Complete | 48 Home          | Checked   | Checked   |
| NA      | NA       | Complete | 81 Home          | Unchecked | Checked   |
| NA      | NA       | Complete | 57 Hospital Trar | Unchecked | Checked   |
| NA      | NA       | Complete | 91 Home          | Checked   | Unchecked |
| NA      | NA       | Complete | 32 Home          | Unchecked | Unchecked |

|              |              |          |                  |           |           |
|--------------|--------------|----------|------------------|-----------|-----------|
| NA           | NA           | Complete | 69 Home          | Checked   | Checked   |
| Other        | NA           | Complete | 42 Home          | Checked   | Checked   |
| Other        | Dominican    | Complete | 87 Home          | Unchecked | Unchecked |
| NA           | NA           | Complete | 79 Home          | Checked   | Checked   |
| NA           | NA           | Complete | 92 SNF/NH        | Unchecked | Unchecked |
| NA           | NA           | Complete | 61 Home          | Checked   | Checked   |
| NA           | NA           | NA       | 61 Home          | Checked   | Checked   |
| Other        | Ecuadorian   | Complete | 67 Home          | Checked   | Unchecked |
| NA           | NA           | Complete | 48 Home          | Unchecked | Checked   |
| Other        | Ecuadorian   | Complete | 64 Home          | Checked   | Checked   |
| NA           | NA           | Complete | 71 Home          | Checked   | Checked   |
| Other        | Guatemalan   | Complete | 42 Home          | Checked   | Checked   |
| Other        | Peruvian     | Complete | 48 Home          | Checked   | Checked   |
| NA           | NA           | Complete | 48 Hospital Trar | Unchecked | Unchecked |
| NA           | NA           | Complete | 88 Assisted Livi | Unchecked | Unchecked |
| NA           | NA           | Complete | 67 Urgent Care   | Checked   | Checked   |
| Puerto Rican | NA           | Complete | 79 Home          | Unchecked | Unchecked |
| Puerto Rican | NA           | Complete | 67 SNF/NH        | Checked   | Checked   |
| NA           | NA           | Complete | 72 Home          | Checked   | Unchecked |
| Puerto Rican | NA           | Complete | 71 SNF/NH        | Unchecked | Unchecked |
| Other        | Latin Americ | Complete | 81 SNF/NH        | Unchecked | Unchecked |
| Puerto Rican | NA           | Complete | 78 Home          | Unchecked | Checked   |
| NA           | NA           | Complete | 88 Urgent Care   | Checked   | Unchecked |
| Other        | Colombian    | Complete | 47 Home          | Checked   | Checked   |
| NA           | NA           | NA       | 47 Home          | Checked   | Checked   |
| NA           | NA           | Complete | 42 Home          | Unchecked | Unchecked |
| Other        | Dominican    | Complete | 68 Home          | Unchecked | Checked   |
| NA           | NA           | Complete | 92 Home          | Unchecked | Unchecked |
| Mexican      | NA           | Complete | 64 Urgent Care   | Checked   | Checked   |
| Mexican      | NA           | Complete | 56 Home          | Checked   | Checked   |
| Mexican      | NA           | Complete | 22 Home          | Checked   | Checked   |
| NA           | NA           | Complete | 57 Home          | Checked   | Unchecked |
| NA           | NA           | Complete | 65 Hospital Trar | Checked   | Unchecked |
| NA           | NA           | Complete | 76 Home          | Checked   | Unchecked |
| Other        | Peruvian     | Complete | 77 Home          | Checked   | Checked   |
| NA           | NA           | Complete | 87 Group Home    | Unchecked | Checked   |
| NA           | NA           | Complete | 57 Home          | Unchecked | Unchecked |
| NA           | NA           | Complete | 71 Home          | Checked   | Unchecked |
| NA           | NA           | Complete | 56 Doctor Officε | Checked   | Unchecked |
| NA           | NA           | Complete | 90 Assisted Livi | Unchecked | Checked   |
| NA           | NA           | Complete | 66 Home          | Checked   | Unchecked |
| NA           | NA           | Complete | 60 Home          | Unchecked | Unchecked |
| NA           | NA           | Complete | 66 Doctor Officε | Unchecked | Unchecked |
| NA           | NA           | Complete | 43 Home          | Unchecked | Checked   |
| NA           | NA           | Complete | 72 Home          | Unchecked | Checked   |

|       |                 |          |                    |           |           |
|-------|-----------------|----------|--------------------|-----------|-----------|
| NA    | NA              | Complete | 88 SNF/NH          | Unchecked | Unchecked |
| NA    | NA              | Complete | 64 Hospital Trar   | Unchecked | Unchecked |
| NA    | NA              | Complete | 66 Home            | Unchecked | Unchecked |
| NA    | NA              | Complete | 75 Home            | Unchecked | Unchecked |
| NA    | NA              | Complete | 63 Home            | Checked   | Unchecked |
| NA    | NA              | Complete | 71 Home            | Checked   | Unchecked |
| NA    | NA              | Complete | 42 Home            | Unchecked | Checked   |
| NA    | NA              | Complete | 31 Hospital Trar   | Unchecked | Unchecked |
| NA    | NA              | Complete | 68 Home            | Checked   | Checked   |
| NA    | NA              | Complete | 87 Doctor Office   | Checked   | Unchecked |
| NA    | NA              | Complete | 95 Assisted Living | Unchecked | Checked   |
| NA    | NA              | Complete | 72 Home            | Checked   | Unchecked |
| NA    | NA              | Complete | 88 SNF/NH          | Unchecked | Unchecked |
| NA    | NA              | Complete | 54 SNF/NH          | Checked   | Checked   |
| NA    | NA              | Complete | 81 Home            | Unchecked | Unchecked |
| NA    | NA              | Complete | 50 NA              | Unchecked | Checked   |
| NA    | NA              | Complete | 60 Home            | Checked   | Unchecked |
| NA    | NA              | Complete | 75 Other           | Checked   | Unchecked |
| NA    | NA              | Complete | 59 Rehabilitatio   | Unchecked | Unchecked |
| NA    | NA              | NA       | 59 SNF/NH          | Unchecked | Unchecked |
| NA    | NA              | Complete | 78 Home            | Unchecked | Unchecked |
| NA    | NA              | NA       | 78 SNF/NH          | Unchecked | Unchecked |
| NA    | NA              | Complete | 70 Home            | Unchecked | Checked   |
| NA    | NA              | Complete | 51 Urgent Care     | Checked   | Unchecked |
| NA    | NA              | Complete | 75 Home            | Checked   | Unchecked |
| NA    | NA              | Complete | 75 Home            | Checked   | Checked   |
| NA    | NA              | Complete | 31 Home            | Checked   | Checked   |
| NA    | NA              | Complete | 90 Assisted Living | Checked   | Unchecked |
| NA    | NA              | Complete | 98 SNF/NH          | Unchecked | Unchecked |
| NA    | NA              | Complete | 71 Home            | Checked   | Unchecked |
| NA    | NA              | Complete | 81 SNF/NH          | Checked   | Checked   |
| NA    | NA              | Complete | 58 Hospital Trar   | Unchecked | Unchecked |
| NA    | NA              | Complete | 79 SNF/NH          | Unchecked | Unchecked |
| Other | listed as other | Complete | 54 Hospital Trar   | Checked   | Checked   |
| NA    | NA              | Complete | 89 Home            | Checked   | Checked   |
| Other | Colombian       | Complete | 51 Home            | Unchecked | Unchecked |
| Other | Peruvian        | Complete | 74 Home            | Checked   | Unchecked |
| NA    | NA              | Complete | 56 Home            | Checked   | Checked   |
| Other | Peruvian        | Complete | 83 Home            | Checked   | Unchecked |
| NA    | NA              | Complete | 61 Home            | Unchecked | Checked   |
| NA    | NA              | Complete | 79 Home            | Checked   | Unchecked |
| NA    | NA              | Complete | 85 Home            | Checked   | Unchecked |
| NA    | NA              | Complete | 63 Doctor Office   | Checked   | Checked   |
| Other | Ecuadorian      | Complete | 28 Home            | Unchecked | Unchecked |
| NA    | NA              | Complete | 52 Home            | Unchecked | Checked   |

|              |    |          |    |               |           |           |
|--------------|----|----------|----|---------------|-----------|-----------|
| NA           | NA | Complete | 32 | Hospital Trar | Checked   | Unchecked |
| NA           | NA | Complete | 87 | Urgent Care   | Unchecked | Checked   |
| NA           | NA | NA       | 87 | Home          | Unchecked | Unchecked |
| NA           | NA | Complete | 65 | Home          | Checked   | Checked   |
| NA           | NA | Complete | 67 | Home          | Unchecked | Unchecked |
| NA           | NA | Complete | 62 | Home          | Checked   | Unchecked |
| Puerto Rican | NA | Complete | 69 | Home          | Unchecked | Unchecked |





























































|           |           |           |           |           |           |           |
|-----------|-----------|-----------|-----------|-----------|-----------|-----------|
| Checked   | Unchecked | Unchecked | Unchecked | Unchecked | Unchecked | Unchecked |
| Unchecked | Unchecked | Unchecked | Unchecked | Unchecked | Unchecked | Unchecked |
| Checked   | Unchecked | Unchecked | Unchecked | Unchecked | Unchecked | Unchecked |
| Checked   | Unchecked | Unchecked | Unchecked | Unchecked | Unchecked | Unchecked |
| Checked   | Unchecked | Unchecked | Unchecked | Unchecked | Unchecked | Unchecked |
| Checked   | Unchecked | Unchecked | Unchecked | Unchecked | Unchecked | Unchecked |
| Checked   | Unchecked | Unchecked | Unchecked | Unchecked | Unchecked | Unchecked |
| Unchecked | Unchecked | Checked   | Unchecked | Unchecked | Unchecked | Unchecked |

|           |                |        |        |      |     |     |
|-----------|----------------|--------|--------|------|-----|-----|
| Unchecked | bilateral covi | 74427  | 42779  | 10.4 | Yes | No  |
| Unchecked | AMS, ALCOH     | 132141 | 51890  | 27.7 | Yes | Yes |
| Unchecked | COVID 19, R/   | 48540  | 25609  | 4.7  | Yes | Yes |
| Unchecked | Pregnancy      | 111399 | 61340  | 25.7 | Yes | Yes |
| Unchecked | COVID 19 PN    | 82150  | 41276  | 16.5 | Yes | No  |
| Unchecked | SYNCOPE r/c    | 64769  | 33459  | 9    | Yes | Yes |
| Unchecked | covid hypoxe   | 111399 | 61340  | 25.7 | Yes | Yes |
| Unchecked | pna, covid r/  | 111399 | 61340  | 25.7 | Yes | Yes |
| Unchecked | COVID HYPO:    | 79882  | 40344  | 13.9 | Yes | Yes |
| Unchecked | SUSPECTED (    | 71439  | 37532  | 7.4  | Yes | Yes |
| Unchecked | PUI shortnes   | 111399 | 61340  | 25.7 | Yes | Yes |
| Unchecked | covid 19 pna   | 99005  | 47604  | 15   | Yes | Yes |
| Unchecked | Pisipati, Rarr | 201232 | 107688 | 50.3 | Yes | Yes |
| Unchecked | pna, covid 19  | 99005  | 47604  | 15   | Yes | No  |
| Unchecked | covid positive | 93692  | 52725  | 19.5 | Yes | Yes |
| Unchecked | covid pna/hy   | 111399 | 61340  | 25.7 | Yes | Yes |
| Unchecked | viral sepsis/c | 64769  | 33459  | 9    | Yes | Yes |
| Unchecked | sob, pui       | 191773 | 88167  | 49   | Yes | Yes |
| Unchecked | pna, r/o covi  | 120846 | 70424  | 30.4 | Yes | Yes |
| Unchecked | covid pna      | 201232 | 107688 | 50.3 | Yes | Yes |
| Unchecked | covid pna      | 201232 | 107688 | 50.3 | Yes | Yes |
| Unchecked | acute respira  | 99005  | 47604  | 15   | Yes | Yes |
| Unchecked | acute respira  | 152932 | 72954  | 38   | Yes | Yes |
| Unchecked | T8 fracture/i  | 152932 | 72954  | 38   | Yes | Yes |
| Unchecked | NA             | 54332  | 31059  | 6.2  | Yes | Yes |
| Unchecked | NA             | 27687  | 15770  | 1.3  | Yes | No  |
| Unchecked | NA             | 44559  | 26937  | 5    | Yes | Yes |
| Unchecked | NA             | 65435  | 58095  | 13   | Yes | Yes |
| Unchecked | NA             | 201232 | 107688 | 50.3 | Yes | No  |
| Unchecked | NA             | 111399 | 61340  | 25.7 | Yes | Yes |
| Unchecked | NA             | 99005  | 47604  | 15   | Yes | Yes |
| Unchecked | NA             | 82150  | 41276  | 16.5 | Yes | Yes |
| Unchecked | NA             | 82150  | 41276  | 16.5 | Yes | Yes |
| Unchecked | NA             | 98700  | 42809  | 17.7 | Yes | Yes |
| Unchecked | NA             | 98700  | 42809  | 17.7 | Yes | Yes |
| Unchecked | NA             | 99124  | 63322  | 25   | No  | Yes |
| Unchecked | NA             | 99005  | 47604  | 15   | Yes | Yes |
| Unchecked | NA             | 99005  | 47604  | 15   | No  | NA  |
| Unchecked | NA             | 148342 | 58201  | 25.6 | Yes | Yes |
| Unchecked | NA             | 74796  | 34284  | 8.6  | Yes | Yes |
| Unchecked | NA             | 44559  | 26937  | 5    | Yes | Yes |
| Unchecked | NA             | 44559  | 26937  | 5    | No  | NA  |
| Unchecked | NA             | 111399 | 61340  | 25.7 | Yes | Yes |
| Unchecked | NA             | 111399 | 61340  | 25.7 | Yes | Yes |
| Unchecked | NA             | 93692  | 52725  | 19.5 | Yes | No  |

|           |               |        |        |      |     |     |
|-----------|---------------|--------|--------|------|-----|-----|
| Unchecked | O98.52 Othe   | 144121 | 82583  | 36.7 | Yes | Yes |
| Unchecked | U07.1 COVID   | 99124  | 63322  | 25   | Yes | Yes |
| Unchecked | U07.1 COVID   | 99124  | 63322  | 25   | Yes | Yes |
| Unchecked | A41.89 Othe   | 201232 | 107688 | 50.3 | Yes | Yes |
| Unchecked | U07.1 COVID   | 82150  | 41276  | 16.5 | Yes | Yes |
| Unchecked | I12.0 Hyp chr | 110448 | 43243  | 21.9 | Yes | No  |
| Unchecked | NA            | NA     | NA     | NA   | No  | Yes |
| Unchecked | NA            | 82150  | 41276  | 16.5 | Yes | Yes |
| Unchecked | NA            | 132141 | 51890  | 27.7 | Yes | Yes |
| Unchecked | NA            | 36046  | 17454  | 1.3  | Yes | Yes |
| Unchecked | NA            | 36046  | 17454  | 1.3  | Yes | Yes |
| Unchecked | NA            | 55906  | 25157  | 5.9  | Yes | Yes |
| Unchecked | NA            | 111399 | 61340  | 25.7 | Yes | Yes |
| Unchecked | NA            | 79882  | 40344  | 13.9 | Yes | Yes |
| Unchecked | NA            | 138477 | 69859  | 32   | Yes | Yes |
| Unchecked | NA            | 47955  | 24019  | 2.7  | Yes | Yes |
| Unchecked | NA            | 64769  | 33459  | 9    | Yes | Yes |
| Unchecked | NA            | 95339  | 54487  | 19.9 | Yes | Yes |
| Unchecked | NA            | 71439  | 37532  | 7.4  | Yes | Yes |
| Unchecked | NA            | 71439  | 37532  | 7.4  | Yes | Yes |
| Unchecked | NA            | 79882  | 40344  | 13.9 | No  | Yes |
| Unchecked | NA            | 93692  | 52725  | 19.5 | Yes | Yes |
| Unchecked | NA            | 93692  | 52725  | 19.5 | Yes | No  |
| Unchecked | NA            | 99005  | 47604  | 15   | Yes | Yes |
| Unchecked | NA            | 201232 | 107688 | 50.3 | Yes | Yes |
| Unchecked | NA            | 111399 | 61340  | 25.7 | Yes | Yes |
| Unchecked | NA            | 111399 | 61340  | 25.7 | Yes | Yes |
| Unchecked | NA            | 93692  | 52725  | 19.5 | Yes | Yes |
| Unchecked | NA            | 48540  | 25609  | 4.7  | No  | No  |
| Unchecked | NA            | 48540  | 25609  | 4.7  | Yes | Yes |
| Unchecked | NA            | 201232 | 107688 | 50.3 | Yes | Yes |
| Checked   | NA            | 132141 | 51890  | 27.7 | Yes | Yes |
| Unchecked | NA            | 201232 | 107688 | 50.3 | No  | Yes |
| Unchecked | NA            | 163902 | 71792  | 41.6 | Yes | Yes |
| Unchecked | NA            | 79882  | 40344  | 13.9 | Yes | Yes |
| Unchecked | NA            | 111399 | 61340  | 25.7 | No  | Yes |
| Unchecked | NA            | 111399 | 61340  | 25.7 | No  | NA  |
| Unchecked | NA            | 51477  | 24043  | 3.9  | Yes | Yes |
| Checked   | NA            | 74427  | 42779  | 10.4 | Yes | Yes |
| Unchecked | NA            | 111399 | 61340  | 25.7 | Yes | Yes |
| Unchecked | NA            | 111399 | 61340  | 25.7 | Yes | No  |
| Unchecked | NA            | 95339  | 54487  | 19.9 | Yes | Yes |
| Unchecked | NA            | 132141 | 51890  | 27.7 | Yes | Yes |
| Unchecked | NA            | 65098  | 24012  | 5.8  | Yes | Yes |
| Unchecked | NA            | 93692  | 52725  | 19.5 | Yes | Yes |

|           |               |        |        |      |     |     |
|-----------|---------------|--------|--------|------|-----|-----|
| Unchecked | NA            | 65435  | 58095  | 13   | Yes | Yes |
| Unchecked | NA            | 71439  | 37532  | 7.4  | Yes | Yes |
| Unchecked | NA            | 201232 | 107688 | 50.3 | No  | Yes |
| Unchecked | NA            | 64456  | 29507  | 5.1  | Yes | Yes |
| Unchecked | NA            | 44559  | 26937  | 5    | Yes | Yes |
| Unchecked | NA            | 201232 | 107688 | 50.3 | Yes | Yes |
| Unchecked | NA            | 74427  | 42779  | 10.4 | Yes | Yes |
| Unchecked | NA            | 82451  | 49023  | 15.1 | Yes | Yes |
| Unchecked | NA            | 108817 | 65058  | 22.3 | Yes | No  |
| Unchecked | NA            | 117833 | 60427  | 26   | No  | Yes |
| Unchecked | NA            | 73165  | 36091  | 8.3  | No  | Yes |
| Unchecked | NA            | 201232 | 107688 | 50.3 | Yes | No  |
| Unchecked | NA            | 48540  | 25609  | 4.7  | Yes | Yes |
| Unchecked | NA            | 71439  | 37532  | 7.4  | Yes | Yes |
| Unchecked | NA            | 99005  | 47604  | 15   | Yes | Yes |
| Unchecked | NA            | 63652  | 25877  | 5.1  | Yes | Yes |
| Unchecked | NA            | 99005  | 47604  | 15   | Yes | Yes |
| Unchecked | NA            | 65435  | 58095  | 13   | Yes | Yes |
| Unchecked | NA            | 99005  | 47604  | 15   | No  | Yes |
| Unchecked | na            | 111399 | 61340  | 25.7 | Yes | No  |
| Unchecked | na            | 111399 | 61340  | 25.7 | Yes | No  |
| Unchecked | NA            | 65435  | 58095  | 13   | Yes | No  |
| Unchecked | NA            | 111399 | 61340  | 25.7 | Yes | No  |
| Unchecked | n/a           | 79882  | 40344  | 13.9 | Yes | No  |
| Unchecked | N/A           | 111399 | 61340  | 25.7 | Yes | Yes |
| Unchecked | Alcena, Valie | 111399 | 61340  | 25.7 | Yes | Yes |
| Unchecked | N/A           | 99005  | 47604  | 15   | Yes | Yes |
| Unchecked | n/a           | 132141 | 51890  | 27.7 | Yes | Yes |
| Unchecked | NA            | 201232 | 107688 | 50.3 | Yes | No  |
| Unchecked | NA            | 76793  | 38622  | 13.1 | Yes | Yes |
| Unchecked | NA            | 79882  | 40344  | 13.9 | Yes | Yes |
| Unchecked | NA            | 65435  | 58095  | 13   | Yes | Yes |
| Unchecked | NA            | 99005  | 47604  | 15   | Yes | Yes |
| Unchecked | na            | 138477 | 69859  | 32   | Yes | Yes |
| Unchecked | na            | 79882  | 40344  | 13.9 | Yes | Yes |
| Unchecked | na            | 65435  | 58095  | 13   | Yes | Yes |
| Unchecked | na            | 26239  | 18772  | 1.5  | Yes | Yes |
| Unchecked | na            | 58551  | 34911  | 7.3  | Yes | Yes |
| Unchecked | na            | 133297 | 54861  | 29   | Yes | No  |
| Unchecked | na            | 36046  | 17454  | 1.3  | Yes | No  |
| Unchecked | na            | 183871 | 107722 | 46.6 | Yes | No  |
| Unchecked | na            | 111399 | 61340  | 25.7 | Yes | Yes |
| Unchecked | na            | 111399 | 61340  | 25.7 | Yes | Yes |
| Unchecked | na            | 93692  | 52725  | 19.5 | Yes | No  |
| Unchecked | NA            | 120846 | 70424  | 30.4 | Yes | No  |

|           |    |        |        |      |     |     |
|-----------|----|--------|--------|------|-----|-----|
| Unchecked | NA | 48540  | 25609  | 4.7  | No  | Yes |
| Unchecked | NA | 201232 | 107688 | 50.3 | Yes | Yes |
| Unchecked | NA | 51477  | 24043  | 3.9  | No  | Yes |
| Unchecked | NA | 93819  | 42459  | 14.7 | Yes | Yes |
| Unchecked | NA | 99005  | 47604  | 15   | Yes | Yes |
| Unchecked | NA | 71439  | 37532  | 7.4  | Yes | Yes |
| Unchecked | NA | 202583 | 50139  | 50.1 | Yes | Yes |
| Unchecked | NA | 99124  | 63322  | 25   | Yes | Yes |
| Unchecked | NA | 133297 | 54861  | 29   | Yes | Yes |
| Unchecked | NA | 87760  | 44092  | 12.3 | Yes | Yes |
| Unchecked | NA | 79882  | 40344  | 13.9 | Yes | Yes |
| Unchecked | NA | 82150  | 41276  | 16.5 | Yes | Yes |
| Unchecked | NA | 61336  | 26198  | 5.4  | Yes | No  |
| Unchecked | NA | 65435  | 58095  | 13   | Yes | Yes |
| Unchecked | NA | 99005  | 47604  | 15   | Yes | No  |
| Unchecked | NA | 79882  | 40344  | 13.9 | Yes | Yes |
| Unchecked | NA | 73165  | 36091  | 8.3  | Yes | Yes |
| Unchecked | NA | 132141 | 51890  | 27.7 | Yes | Yes |
| Unchecked | NA | 0      | 0      | 0    | Yes | Yes |
| Unchecked | NA | 93692  | 52725  | 19.5 | Yes | Yes |
| Unchecked | NA | 44559  | 26937  | 5    | Yes | No  |
| Unchecked | NA | 93692  | 52725  | 19.5 | Yes | Yes |
| Unchecked | NA | 106875 | 76078  | 24.6 | Yes | No  |
| Unchecked | NA | 65435  | 58095  | 13   | Yes | Yes |
| Unchecked | NA | 82150  | 41276  | 16.5 | Yes | Yes |
| Unchecked | NA | 110448 | 43243  | 21.9 | Yes | Yes |
| Unchecked | NA | 111399 | 61340  | 25.7 | Yes | Yes |
| Unchecked | NA | 82150  | 41276  | 16.5 | Yes | Yes |
| Unchecked | NA | 120846 | 70424  | 30.4 | Yes | Yes |
| Unchecked | NA | 202583 | 50139  | 50.1 | Yes | Yes |
| Unchecked | NA | 73165  | 36091  | 8.3  | Yes | Yes |
| Unchecked | NA | 177553 | 98067  | 46.7 | Yes | Yes |
| Unchecked | NA | 82150  | 41276  | 16.5 | Yes | Yes |
| Unchecked | NA | 82150  | 41276  | 16.5 | Yes | Yes |
| Unchecked | NA | 99124  | 63322  | 25   | Yes | Yes |
| Unchecked | NA | 93692  | 52725  | 19.5 | Yes | Yes |
| Unchecked | NA | 93692  | 52725  | 19.5 | Yes | Yes |
| Unchecked | NA | 110448 | 43243  | 21.9 | Yes | Yes |
| Unchecked | NA | 110650 | 49542  | 21.7 | Yes | Yes |
| Unchecked | NA | 110650 | 49542  | 21.7 | No  | NA  |
| Unchecked | NA | 99005  | 47604  | 15   | Yes | Yes |
| Unchecked | NA | 111399 | 61340  | 25.7 | Yes | Yes |
| Unchecked | NA | 48540  | 25609  | 4.7  | Yes | Yes |
| Unchecked | NA | 73165  | 36091  | 8.3  | Yes | Yes |
| Unchecked | NA | 117833 | 60427  | 26   | Yes | Yes |

|           |               |        |        |      |     |     |
|-----------|---------------|--------|--------|------|-----|-----|
| Unchecked | NA            | 76793  | 38622  | 13.1 | Yes | Yes |
| Unchecked | NA            | 76793  | 38622  | 13.1 | Yes | Yes |
| Unchecked | NA            | 101419 | 60911  | 24.5 | Yes | Yes |
| Unchecked | NA            | 65435  | 58095  | 13   | No  | NA  |
| Unchecked | NA            | 65435  | 58095  | 13   | No  | NA  |
| Unchecked | NA            | 82150  | 41276  | 16.5 | Yes | Yes |
| Unchecked | U07.1 COVID   | 65435  | 58095  | 13   | Yes | Yes |
| Unchecked | S22.089A Un   | 201232 | 107688 | 50.3 | Yes | Yes |
| Unchecked | U07.1 COVID   | 110448 | 43243  | 21.9 | Yes | Yes |
| Unchecked | NA            | 87760  | 44092  | 12.3 | Yes | Yes |
| Unchecked | NA            | 132141 | 51890  | 27.7 | Yes | Yes |
| Unchecked | NA            | 201232 | 107688 | 50.3 | Yes | Yes |
| Unchecked | NA            | 65435  | 58095  | 13   | Yes | Yes |
| Unchecked | NA            | 111399 | 61340  | 25.7 | Yes | Yes |
| Unchecked | NA            | 65435  | 58095  | 13   | Yes | Yes |
| Unchecked | NA            | 65435  | 58095  | 13   | Yes | Yes |
| Unchecked | NA            | 65435  | 58095  | 13   | Yes | Yes |
| Unchecked | NA            | 117833 | 60427  | 26   | Yes | Yes |
| Unchecked | NA            | 65435  | 58095  | 13   | No  | Yes |
| Unchecked | NA            | 115745 | 45405  | 19.5 | No  | Yes |
| Unchecked | NA            | 201232 | 107688 | 50.3 | Yes | Yes |
| Unchecked | NA            | 76793  | 38622  | 13.1 | Yes | No  |
| Unchecked | NA            | 76793  | 38622  | 13.1 | Yes | Yes |
| Unchecked | NA            | 82150  | 41276  | 16.5 | Yes | Yes |
| Unchecked | NA            | 79882  | 40344  | 13.9 | Yes | Yes |
| Unchecked | NA            | 201232 | 107688 | 50.3 | Yes | Yes |
| Unchecked | na            | 201232 | 107688 | 50.3 | Yes | Yes |
| Unchecked | na            | 144121 | 82583  | 36.7 | Yes | Yes |
| Unchecked | NA            | 37015  | 19100  | 1.4  | Yes | Yes |
| Unchecked | NA            | 132141 | 51890  | 27.7 | Yes | Yes |
| Unchecked | na            | 98700  | 42809  | 17.7 | Yes | Yes |
| Unchecked | na            | 87760  | 44092  | 12.3 | Yes | Yes |
| Unchecked | na            | 64769  | 33459  | 9    | Yes | Yes |
| Unchecked | na            | 65435  | 58095  | 13   | Yes | Yes |
| Unchecked | na            | 111399 | 61340  | 25.7 | Yes | Yes |
| Unchecked | na            | 44559  | 26937  | 5    | No  | Yes |
| Unchecked | na            | 79882  | 40344  | 13.9 | Yes | Yes |
| Unchecked | na            | 50832  | 28976  | 1.6  | No  | Yes |
| Unchecked | na            | 87760  | 44092  | 12.3 | No  | Yes |
| Unchecked | Acute hypoxi  | 64769  | 33459  | 9    | Yes | No  |
| Unchecked | COVID-19      | 79882  | 40344  | 13.9 | Yes | Yes |
| Unchecked | Acute respira | 120846 | 70424  | 30.4 | Yes | Yes |
| Unchecked | NA            | 120846 | 70424  | 30.4 | Yes | Yes |
| Unchecked | NA            | 99005  | 47604  | 15   | Yes | Yes |
| Unchecked | NA            | 183871 | 107722 | 46.6 | Yes | Yes |

|           |             |        |        |      |     |     |
|-----------|-------------|--------|--------|------|-----|-----|
| Unchecked | NA          | 108817 | 65058  | 22.3 | Yes | Yes |
| Unchecked | NA          | 111399 | 61340  | 25.7 | Yes | No  |
| Unchecked | NA          | 76793  | 38622  | 13.1 | Yes | Yes |
| Unchecked | NA          | 65435  | 58095  | 13   | Yes | Yes |
| Unchecked | NA          | 71439  | 37532  | 7.4  | Yes | Yes |
| Unchecked | Pneumonia   | 71439  | 37532  | 7.4  | Yes | Yes |
| Unchecked | NA          | 27687  | 15770  | 1.3  | Yes | Yes |
| Unchecked | NA          | 99005  | 47604  | 15   | Yes | No  |
| Unchecked | NA          | 47955  | 24019  | 2.7  | Yes | Yes |
| Unchecked | NA          | 79882  | 40344  | 13.9 | Yes | Yes |
| Unchecked | n/a         | 79882  | 40344  | 13.9 | Yes | Yes |
| Unchecked | n/a         | 111399 | 61340  | 25.7 | Yes | Yes |
| Unchecked | NA          | 93692  | 52725  | 19.5 | Yes | Yes |
| Unchecked | NA          | 201232 | 107688 | 50.3 | Yes | Yes |
| Unchecked | NA          | 191773 | 88167  | 49   | Yes | Yes |
| Unchecked | NA          | 201232 | 107688 | 50.3 | Yes | Yes |
| Unchecked | NA          | 44559  | 26937  | 5    | Yes | Yes |
| Unchecked | NA          | 111399 | 61340  | 25.7 | Yes | Yes |
| Unchecked | NA          | 54332  | 31059  | 6.2  | Yes | No  |
| Unchecked | NA          | 106875 | 76078  | 24.6 | Yes | No  |
| Unchecked | NA          | 71477  | 29637  | 7.2  | Yes | No  |
| Unchecked | Glenn davis | 120846 | 70424  | 30.4 | Yes | Yes |
| Unchecked | ESRD        | 120846 | 70424  | 30.4 | Yes | Yes |
| Unchecked | NA          | 103239 | 66958  | 21.7 | No  | Yes |
| Unchecked | NA          | 99005  | 47604  | 15   | Yes | Yes |
| Unchecked | NA          | 111399 | 61340  | 25.7 | Yes | Yes |
| Unchecked | NA          | 82150  | 41276  | 16.5 | Yes | Yes |
| Unchecked | NA          | 82150  | 41276  | 16.5 | Yes | Yes |
| Unchecked | NA          | 65435  | 58095  | 13   | Yes | Yes |
| Unchecked | NA          | 65435  | 58095  | 13   | Yes | Yes |
| Unchecked | NA          | 101419 | 60911  | 24.5 | Yes | Yes |
| Unchecked | NA          | 32902  | 18768  | 1.6  | Yes | Yes |
| Unchecked | NA          | 79882  | 40344  | 13.9 | Yes | Yes |
| Unchecked | NA          | 117833 | 60427  | 26   | Yes | Yes |
| Unchecked | NA          | 74427  | 42779  | 10.4 | Yes | Yes |
| Unchecked | NA          | 98700  | 42809  | 17.7 | Yes | Yes |
| Unchecked | NA          | 109375 | 45753  | 13.8 | Yes | Yes |
| Unchecked | NA          | 183871 | 107722 | 46.6 | Yes | No  |
| Unchecked | NA          | 40733  | 19195  | 2.6  | Yes | Yes |
| Unchecked | NA          | 56612  | 28845  | 4.1  | Yes | Yes |
| Unchecked | NA          | 56612  | 28845  | 4.1  | No  | NA  |
| Unchecked | NA          | 76793  | 38622  | 13.1 | Yes | Yes |
| Unchecked | NA          | 132141 | 51890  | 27.7 | Yes | Yes |
| Unchecked | NA          | 64769  | 33459  | 9    | Yes | Yes |
| Unchecked | NA          | 44559  | 26937  | 5    | Yes | Yes |

|           |              |        |        |      |     |     |
|-----------|--------------|--------|--------|------|-----|-----|
| Unchecked | NA           | 82150  | 41276  | 16.5 | Yes | Yes |
| Unchecked | NA           | 93365  | 49875  | 13.2 | Yes | Yes |
| Unchecked | NA           | 101419 | 60911  | 24.5 | Yes | Yes |
| Unchecked | dr.Chattergu | 63652  | 25877  | 5.1  | Yes | Yes |
| Unchecked | NA           | 87760  | 44092  | 12.3 | Yes | Yes |
| Unchecked | NA           | 202583 | 50139  | 50.1 | Yes | Yes |
| Unchecked | NA           | 120846 | 70424  | 30.4 | Yes | No  |
| Unchecked | NA           | 47955  | 24019  | 2.7  | Yes | Yes |
| Unchecked | NA           | 183871 | 107722 | 46.6 | Yes | No  |
| Unchecked | NA           | 111399 | 61340  | 25.7 | Yes | Yes |
| Unchecked | NA           | 111399 | 61340  | 25.7 | Yes | Yes |
| Unchecked | NA           | 144414 | 77158  | 38.5 | Yes | Yes |
| Unchecked | NA           | 99005  | 47604  | 15   | Yes | Yes |
| Checked   | NA           | 33932  | 16992  | 1.2  | Yes | Yes |
| Unchecked | NA           | 63652  | 25877  | 5.1  | Yes | Yes |
| Unchecked | NA           | 65435  | 58095  | 13   | Yes | Yes |
| Unchecked | NA           | 44559  | 26937  | 5    | Yes | Yes |
| Unchecked | NA           | 56612  | 28845  | 4.1  | No  | Yes |
| Unchecked | NA           | 79882  | 40344  | 13.9 | Yes | Yes |
| Unchecked | NA           | 99124  | 63322  | 25   | Yes | Yes |
| Unchecked | NA           | 152932 | 72954  | 38   | Yes | No  |
| Unchecked | NA           | 79882  | 40344  | 13.9 | Yes | Yes |
| Unchecked | NA           | 99005  | 47604  | 15   | Yes | No  |
| Unchecked | NA           | 111399 | 61340  | 25.7 | Yes | Yes |
| Unchecked | NA           | 57160  | 31829  | 5.5  | Yes | Yes |
| Unchecked | NA           | 65435  | 58095  | 13   | Yes | Yes |
| Unchecked | NA           | 144414 | 77158  | 38.5 | Yes | Yes |
| Unchecked | NA           | 167847 | 85775  | 42.8 | Yes | Yes |
| Unchecked | NA           | 87760  | 44092  | 12.3 | Yes | Yes |
| Unchecked | NA           | 93692  | 52725  | 19.5 | Yes | Yes |
| Unchecked | NA           | 202583 | 50139  | 50.1 | No  | Yes |
| Unchecked | NA           | 41710  | 23547  | 3.2  | Yes | Yes |
| Unchecked | NA           | 111399 | 61340  | 25.7 | Yes | Yes |
| Unchecked | NA           | 55145  | 22758  | 8.6  | Yes | Yes |
| Unchecked | NA           | 201232 | 107688 | 50.3 | No  | Yes |
| Unchecked | NA           | 101419 | 60911  | 24.5 | Yes | Yes |
| Unchecked | NA           | 108817 | 65058  | 22.3 | Yes | Yes |
| Unchecked | NA           | 111399 | 61340  | 25.7 | Yes | Yes |
| Unchecked | NA           | 63652  | 25877  | 5.1  | Yes | Yes |
| Unchecked | NA           | 71477  | 29637  | 7.2  | Yes | Yes |
| Unchecked | NA           | 38526  | 22352  | 2.7  | Yes | Yes |
| Unchecked | NA           | 93692  | 52725  | 19.5 | Yes | No  |
| Unchecked | NA           | 80542  | 49852  | 12.4 | No  | Yes |
| Unchecked | NA           | 48540  | 25609  | 4.7  | Yes | Yes |
| Unchecked | NA           | 58551  | 34911  | 7.3  | Yes | Yes |



|           |                |        |        |      |     |     |
|-----------|----------------|--------|--------|------|-----|-----|
| Unchecked | NA             | 79882  | 40344  | 13.9 | Yes | Yes |
| Unchecked | NA             | 71439  | 37532  | 7.4  | Yes | Yes |
| Unchecked | NA             | 74427  | 42779  | 10.4 | Yes | Yes |
| Unchecked | NA             | 79882  | 40344  | 13.9 | Yes | Yes |
| Unchecked | NA             | 72961  | 44761  | 13.6 | Yes | Yes |
| Unchecked | NA             | 108817 | 65058  | 22.3 | Yes | No  |
| Unchecked | NA             | 201232 | 107688 | 50.3 | Yes | Yes |
| Unchecked | NA             | 183871 | 107722 | 46.6 | Yes | Yes |
| Unchecked | NA             | 64769  | 33459  | 9    | Yes | Yes |
| Unchecked | NA             | 82150  | 41276  | 16.5 | Yes | Yes |
| Unchecked | NA             | 132141 | 51890  | 27.7 | Yes | Yes |
| Unchecked | NA             | 87760  | 44092  | 12.3 | No  | Yes |
| Unchecked | NA             | 105670 | 60507  | 23   | Yes | No  |
| Unchecked | NA             | 110448 | 43243  | 21.9 | Yes | Yes |
| Unchecked | NA             | 120846 | 70424  | 30.4 | Yes | No  |
| Unchecked | NA             | 111399 | 61340  | 25.7 | No  | Yes |
| Unchecked | coronavirus i  | 183871 | 107722 | 46.6 | Yes | No  |
| Unchecked | sepsis         | 111399 | 61340  | 25.7 | No  | NA  |
| Unchecked | sepsis         | 111399 | 61340  | 25.7 | No  | Yes |
| Unchecked | adenocarcin    | 102848 | 44371  | 17.5 | No  | Yes |
| Unchecked | COVID-19       | 117833 | 60427  | 26   | Yes | Yes |
| Unchecked | sepsis         | 82150  | 41276  | 16.5 | No  | Yes |
| Unchecked | NA             | 201232 | 107688 | 50.3 | Yes | Yes |
| Unchecked | NA             | 107258 | 45471  | 17.9 | Yes | No  |
| Unchecked | NA             | 177553 | 98067  | 46.7 | Yes | Yes |
| Unchecked | NA             | 202583 | 50139  | 50.1 | No  | Yes |
| Unchecked | NA             | 201232 | 107688 | 50.3 | Yes | Yes |
| Unchecked | NA             | 63652  | 25877  | 5.1  | Yes | Yes |
| Unchecked | NA             | 79882  | 40344  | 13.9 | Yes | No  |
| Unchecked | NA             | 79882  | 40344  | 13.9 | Yes | Yes |
| Unchecked | NA             | 99005  | 47604  | 15   | Yes | No  |
| Unchecked | NA             | 100714 | 32894  | 9.6  | Yes | No  |
| Unchecked | NA             | 99005  | 47604  | 15   | Yes | Yes |
| Unchecked | Daly, Virginia | 102372 | 44426  | 16   | Yes | Yes |
| Unchecked | NA             | 111399 | 61340  | 25.7 | Yes | Yes |
| Unchecked | NA             | 108817 | 65058  | 22.3 | Yes | Yes |
| Unchecked | NA             | 99124  | 63322  | 25   | Yes | Yes |
| Unchecked | NA             | 79882  | 40344  | 13.9 | Yes | Yes |
| Unchecked | NA             | 120846 | 70424  | 30.4 | Yes | Yes |
| Unchecked | NA             | 106875 | 76078  | 24.6 | No  | Yes |
| Unchecked | NA             | 64769  | 33459  | 9    | Yes | Yes |
| Unchecked | NA             | 0      | 0      | 0    | Yes | Yes |
| Unchecked | NA             | 132141 | 51890  | 27.7 | Yes | Yes |
| Unchecked | NA             | 87760  | 44092  | 12.3 | Yes | Yes |
| Unchecked | NA             | 47955  | 24019  | 2.7  | Yes | Yes |

|           |    |        |        |      |     |     |
|-----------|----|--------|--------|------|-----|-----|
| Unchecked | NA | 191773 | 88167  | 49   | Yes | Yes |
| Unchecked | NA | 201232 | 107688 | 50.3 | Yes | Yes |
| Unchecked | NA | 95339  | 54487  | 19.9 | Yes | Yes |
| Unchecked | NA | 110448 | 43243  | 21.9 | Yes | Yes |
| Unchecked | NA | 93692  | 52725  | 19.5 | Yes | Yes |
| Unchecked | NA | 93692  | 52725  | 19.5 | Yes | Yes |
| Unchecked | NA | 93692  | 52725  | 19.5 | Yes | Yes |
| Unchecked | NA | 48540  | 25609  | 4.7  | Yes | Yes |
| Unchecked | NA | 99167  | 46180  | 20.3 | Yes | No  |
| Unchecked | NA | 65435  | 58095  | 13   | Yes | Yes |
| Unchecked | NA | 25275  | 13993  | 0.4  | Yes | No  |
| Unchecked | NA | 101419 | 60911  | 24.5 | Yes | Yes |
| Unchecked | NA | 101419 | 60911  | 24.5 | Yes | Yes |
| Checked   | NA | 82150  | 41276  | 16.5 | Yes | Yes |
| Unchecked | NA | 44559  | 26937  | 5    | Yes | Yes |
| Unchecked | NA | 72961  | 44761  | 13.6 | Yes | Yes |
| Unchecked | NA | 99124  | 63322  | 25   | Yes | Yes |
| Unchecked | NA | 65435  | 58095  | 13   | Yes | Yes |
| Unchecked | NA | 79882  | 40344  | 13.9 | Yes | Yes |
| Unchecked | NA | 111399 | 61340  | 25.7 | Yes | Yes |
| Unchecked | NA | 98700  | 42809  | 17.7 | Yes | No  |
| Unchecked | NA | 65435  | 58095  | 13   | Yes | Yes |
| Unchecked | NA | 82150  | 41276  | 16.5 | Yes | Yes |
| Unchecked | NA | 82150  | 41276  | 16.5 | Yes | Yes |
| Unchecked | NA | 63652  | 25877  | 5.1  | Yes | Yes |
| Unchecked | NA | 86324  | 31398  | 8    | Yes | Yes |
| Unchecked | NA | 64067  | 38734  | 7.3  | Yes | Yes |
| Unchecked | NA | 183871 | 107722 | 46.6 | Yes | Yes |
| Unchecked | NA | 44559  | 26937  | 5    | Yes | No  |
| Unchecked | NA | 50832  | 28976  | 1.6  | Yes | Yes |
| Unchecked | NA | 201232 | 107688 | 50.3 | Yes | No  |
| Unchecked | NA | 183871 | 107722 | 46.6 | Yes | Yes |
| Unchecked | NA | 93692  | 52725  | 19.5 | Yes | Yes |
| Unchecked | NA | 101419 | 60911  | 24.5 | Yes | No  |
| Unchecked | NA | 120846 | 70424  | 30.4 | Yes | Yes |
| Unchecked | NA | 48540  | 25609  | 4.7  | Yes | Yes |
| Unchecked | NA | 64769  | 33459  | 9    | No  | Yes |
| Unchecked | NA | 64769  | 33459  | 9    | No  | NA  |
| Unchecked | NA | 93692  | 52725  | 19.5 | Yes | Yes |
| Unchecked | NA | 82150  | 41276  | 16.5 | Yes | Yes |
| Unchecked | NA | 48540  | 25609  | 4.7  | Yes | No  |
| Unchecked | NA | 183871 | 107722 | 46.6 | Yes | Yes |
| Unchecked | NA | 111399 | 61340  | 25.7 | Yes | Yes |
| Unchecked | NA | 111399 | 61340  | 25.7 | No  | Yes |
| Unchecked | NA | 163902 | 71792  | 41.6 | Yes | Yes |

|           |               |        |       |      |     |     |
|-----------|---------------|--------|-------|------|-----|-----|
| Unchecked | NA            | 79882  | 40344 | 13.9 | Yes | Yes |
| Unchecked | NA            | 144414 | 77158 | 38.5 | Yes | Yes |
| Unchecked | NA            | 79882  | 40344 | 13.9 | Yes | Yes |
| Unchecked | NA            | 79882  | 40344 | 13.9 | Yes | Yes |
| Unchecked | NA            | 132141 | 51890 | 27.7 | Yes | Yes |
| Unchecked | NA            | 99124  | 63322 | 25   | Yes | Yes |
| Unchecked | NA            | 63652  | 25877 | 5.1  | Yes | Yes |
| Unchecked | NA            | 99124  | 63322 | 25   | Yes | Yes |
| Unchecked | NA            | 82150  | 41276 | 16.5 | Yes | Yes |
| Unchecked | NA            | 107258 | 45471 | 17.9 | Yes | No  |
| Unchecked | NA            | 82150  | 41276 | 16.5 | Yes | Yes |
| Unchecked | NA            | 132141 | 51890 | 27.7 | Yes | No  |
| Unchecked | NA            | 44559  | 26937 | 5    | Yes | Yes |
| Unchecked | NA            | 82150  | 41276 | 16.5 | Yes | Yes |
| Unchecked | NA            | 133297 | 54861 | 29   | Yes | Yes |
| Unchecked | NA            | 49891  | 29111 | 5.4  | Yes | Yes |
| Unchecked | NA            | 49891  | 29111 | 5.4  | No  | NA  |
| Unchecked | NA            | 144414 | 77158 | 38.5 | No  | No  |
| Unchecked | NA            | 55145  | 22758 | 8.6  | No  | No  |
| Unchecked | NA            | 58551  | 34911 | 7.3  | Yes | Yes |
| Unchecked | NA            | 163902 | 71792 | 41.6 | Yes | Yes |
| Unchecked | Brinson, Verr | 79882  | 40344 | 13.9 | Yes | Yes |
| Unchecked | NA            | 108817 | 65058 | 22.3 | Yes | Yes |
| Checked   | NA            | 132141 | 51890 | 27.7 | Yes | Yes |
| Unchecked | NA            | 44559  | 26937 | 5    | Yes | Yes |
| Unchecked | NA            | 99005  | 47604 | 15   | Yes | Yes |
| Unchecked | NA            | 84983  | 49908 | 18.4 | Yes | Yes |
| Unchecked | NA            | 37232  | 32614 | 6.6  | Yes | Yes |
| Unchecked | NA            | 79882  | 40344 | 13.9 | Yes | Yes |
| Unchecked | NA            | 111399 | 61340 | 25.7 | Yes | Yes |
| Unchecked | NA            | 99124  | 63322 | 25   | No  | Yes |
| Unchecked | NA            | 163902 | 71792 | 41.6 | No  | No  |
| Unchecked | NA            | 111399 | 61340 | 25.7 | Yes | Yes |
| Unchecked | NA            | 111399 | 61340 | 25.7 | Yes | Yes |
| Unchecked | NA            | 111399 | 61340 | 25.7 | Yes | No  |
| Unchecked | NA            | 37015  | 19100 | 1.4  | Yes | Yes |
| Unchecked | COVID 19      | 132141 | 51890 | 27.7 | Yes | Yes |
| Unchecked | COVID and R   | 27106  | 15315 | 1.1  | Yes | Yes |
| Unchecked | Covid 19      | 117833 | 60427 | 26   | Yes | Yes |
| Unchecked | COVID 19      | 117833 | 60427 | 26   | Yes | Yes |
| Unchecked | Covid pneum   | 44559  | 26937 | 5    | Yes | Yes |
| Unchecked | End Stage Re  | 50832  | 28976 | 1.6  | Yes | Yes |
| Unchecked | Respiratory f | 44559  | 26937 | 5    | Yes | Yes |
| Unchecked | Pneumonia     | 111399 | 61340 | 25.7 | Yes | Yes |
| Unchecked | Pneumonia c   | 82150  | 41276 | 16.5 | Yes | Yes |

|           |                |        |        |      |     |     |
|-----------|----------------|--------|--------|------|-----|-----|
| Unchecked | covid 19 Pneu  | 99005  | 47604  | 15   | Yes | Yes |
| Unchecked | Head Trauma:   | 201232 | 107688 | 50.3 | Yes | Yes |
| Unchecked | Fall           | 201232 | 107688 | 50.3 | Yes | Yes |
| Unchecked | covid 19 viru: | 99005  | 47604  | 15   | Yes | No  |
| Unchecked | Hyponatremi    | 99005  | 47604  | 15   | Yes | Yes |
| Unchecked | Covid infecti  | 47955  | 24019  | 2.7  | Yes | No  |
| Unchecked | RLL PNA        | 71477  | 29637  | 7.2  | Yes | No  |
| Unchecked | Hypoxia        | 183871 | 107722 | 46.6 | Yes | Yes |
| Unchecked | Atypical Che:  | 93692  | 52725  | 19.5 | Yes | No  |
| Unchecked | Chest Pain     | 93692  | 52725  | 19.5 | Yes | Yes |
| Unchecked | Wound Infec    | 99005  | 47604  | 15   | Yes | Yes |
| Unchecked | Acute Hypoxe   | 87760  | 44092  | 12.3 | Yes | Yes |
| Unchecked | Covid 19 res   | 87760  | 44092  | 12.3 | Yes | No  |
| Unchecked | Choledocholi   | 63652  | 25877  | 5.1  | Yes | Yes |
| Unchecked | NA             | 44559  | 26937  | 5    | Yes | Yes |
| Unchecked | fever          | 73165  | 36091  | 8.3  | Yes | Yes |
| Unchecked | hypernatrem    | 177553 | 98067  | 46.7 | Yes | Yes |
| Unchecked | covid pna      | 111399 | 61340  | 25.7 | Yes | Yes |
| Unchecked | r/o Covid      | 99005  | 47604  | 15   | No  | Yes |
| Unchecked | Pneumonia      | 111399 | 61340  | 25.7 | Yes | Yes |
| Unchecked | pneumonia      | 191773 | 88167  | 49   | Yes | Yes |
| Unchecked | Sepsis         | 191773 | 88167  | 49   | Yes | Yes |
| Unchecked | pneumonia c    | 71439  | 37532  | 7.4  | Yes | Yes |
| Unchecked | worsening Cr   | 82150  | 41276  | 16.5 | Yes | No  |
| Unchecked | NA             | 82150  | 41276  | 16.5 | Yes | Yes |
| Unchecked | NA             | 82150  | 41276  | 16.5 | Yes | No  |
| Unchecked | NA             | 30977  | 16098  | 1.4  | Yes | Yes |
| Unchecked | NA             | 30977  | 16098  | 1.4  | No  | NA  |
| Unchecked | NA             | 99124  | 63322  | 25   | Yes | Yes |
| Unchecked | NA             | 71439  | 37532  | 7.4  | Yes | Yes |
| Unchecked | NA             | 111399 | 61340  | 25.7 | Yes | Yes |
| Unchecked | NA             | 111399 | 61340  | 25.7 | Yes | Yes |
| Unchecked | NA             | 39653  | 26427  | 3.1  | Yes | Yes |
| Unchecked | NA             | 87760  | 44092  | 12.3 | Yes | Yes |
| Unchecked | NA             | 87760  | 44092  | 12.3 | Yes | Yes |
| Unchecked | NA             | 82150  | 41276  | 16.5 | No  | Yes |
| Unchecked | NA             | 71439  | 37532  | 7.4  | Yes | Yes |
| Unchecked | NA             | 0      | 0      | 0    | Yes | Yes |
| Unchecked | NA             | 63652  | 25877  | 5.1  | Yes | Yes |
| Unchecked | NA             | 65435  | 58095  | 13   | Yes | No  |
| Unchecked | NA             | 183871 | 107722 | 46.6 | Yes | Yes |
| Unchecked | NA             | 152932 | 72954  | 38   | Yes | No  |
| Unchecked | NA             | 71439  | 37532  | 7.4  | Yes | Yes |
| Unchecked | NA             | 79882  | 40344  | 13.9 | Yes | Yes |
| Unchecked | NA             | 201232 | 107688 | 50.3 | Yes | Yes |

|           |             |        |        |      |     |     |
|-----------|-------------|--------|--------|------|-----|-----|
| Unchecked | NA          | 132141 | 51890  | 27.7 | Yes | Yes |
| Unchecked | NA          | 111399 | 61340  | 25.7 | Yes | Yes |
| Unchecked | NA          | 65435  | 58095  | 13   | Yes | Yes |
| Unchecked | NA          | 111399 | 61340  | 25.7 | Yes | Yes |
| Unchecked | NA          | 82150  | 41276  | 16.5 | Yes | No  |
| Unchecked | NA          | 111399 | 61340  | 25.7 | Yes | Yes |
| Unchecked | NA          | 111399 | 61340  | 25.7 | No  | NA  |
| Unchecked | NA          | 111399 | 61340  | 25.7 | No  | NA  |
| Unchecked | NA          | 79882  | 40344  | 13.9 | Yes | Yes |
| Unchecked | NA          | 65435  | 58095  | 13   | Yes | Yes |
| Unchecked | NA          | 110448 | 43243  | 21.9 | Yes | Yes |
| Unchecked | NA          | 111399 | 61340  | 25.7 | Yes | Yes |
| Unchecked | NA          | 111399 | 61340  | 25.7 | No  | NA  |
| Unchecked | NA          | 132141 | 51890  | 27.7 | Yes | Yes |
| Unchecked | NA          | 99005  | 47604  | 15   | Yes | Yes |
| Unchecked | NA          | 47955  | 24019  | 2.7  | Yes | Yes |
| Unchecked | NA          | 63652  | 25877  | 5.1  | Yes | Yes |
| Unchecked | NA          | 79882  | 40344  | 13.9 | No  | Yes |
| Unchecked | NA          | 64769  | 33459  | 9    | Yes | No  |
| Unchecked | NA          | 79882  | 40344  | 13.9 | Yes | Yes |
| Unchecked | NA          | 111399 | 61340  | 25.7 | Yes | Yes |
| Unchecked | NA          | 99005  | 47604  | 15   | Yes | Yes |
| Unchecked | NA          | 79882  | 40344  | 13.9 | Yes | Yes |
| Unchecked | NA          | 65435  | 58095  | 13   | Yes | Yes |
| Unchecked | NA          | 79882  | 40344  | 13.9 | Yes | Yes |
| Unchecked | NA          | 79882  | 40344  | 13.9 | No  | NA  |
| Unchecked | NA          | 201232 | 107688 | 50.3 | Yes | Yes |
| Unchecked | NA          | 111399 | 61340  | 25.7 | Yes | Yes |
| Unchecked | NA          | 111399 | 61340  | 25.7 | Yes | Yes |
| Unchecked | NA          | 111399 | 61340  | 25.7 | Yes | Yes |
| Unchecked | NA          | 163902 | 71792  | 41.6 | Yes | Yes |
| Unchecked | NA          | 163902 | 71792  | 41.6 | No  | NA  |
| Unchecked | NA          | 111399 | 61340  | 25.7 | No  | Yes |
| Unchecked | NA          | 63652  | 25877  | 5.1  | Yes | Yes |
| Unchecked | NA          | 99005  | 47604  | 15   | Yes | Yes |
| Unchecked | NA          | 47955  | 24019  | 2.7  | Yes | Yes |
| Unchecked | NA          | 56612  | 28845  | 4.1  | Yes | Yes |
| Unchecked | NA          | 50832  | 28976  | 1.6  | Yes | Yes |
| Unchecked | Martimucci, | 99005  | 47604  | 15   | Yes | Yes |
| Unchecked | NA          | 95339  | 54487  | 19.9 | Yes | Yes |
| Unchecked | NA          | NA     | NA     | NA   | Yes | Yes |
| Unchecked | NA          | 105698 | 45646  | 16.8 | Yes | No  |
| Unchecked | NA          | 201232 | 107688 | 50.3 | Yes | Yes |
| Unchecked | NA          | 44559  | 26937  | 5    | Yes | Yes |
| Unchecked | NA          | 111399 | 61340  | 25.7 | Yes | Yes |

|           |               |        |        |      |     |     |
|-----------|---------------|--------|--------|------|-----|-----|
| Unchecked | NA            | 108817 | 65058  | 22.3 | Yes | Yes |
| Unchecked | NA            | 191773 | 88167  | 49   | Yes | Yes |
| Unchecked | Pneumonia     | 64456  | 29507  | 5.1  | Yes | Yes |
| Unchecked | COVID         | 111399 | 61340  | 25.7 | Yes | Yes |
| Unchecked | retroperitoni | 111399 | 61340  | 25.7 | No  | NA  |
| Unchecked | Covid 19      | 108817 | 65058  | 22.3 | Yes | Yes |
| Unchecked | SOB           | 79882  | 40344  | 13.9 | Yes | Yes |
| Unchecked | Sepsis        | 74427  | 42779  | 10.4 | No  | Yes |
| Unchecked | covid pneum   | 65435  | 58095  | 13   | Yes | No  |
| Unchecked | Covid 19      | 111399 | 61340  | 25.7 | Yes | No  |
| Unchecked | Covid 19      | 0      | 0      | 0    | Yes | No  |
| Unchecked | COVID 19, Pr  | 97000  | 38171  | 9.8  | Yes | Yes |
| Unchecked | NA            | 65435  | 58095  | 13   | Yes | Yes |
| Unchecked | NA            | 111399 | 61340  | 25.7 | Yes | Yes |
| Unchecked | NA            | 99005  | 47604  | 15   | Yes | Yes |
| Unchecked | NA            | 82150  | 41276  | 16.5 | No  | No  |
| Unchecked | NA            | 111399 | 61340  | 25.7 | Yes | Yes |
| Unchecked | NA            | 71477  | 29637  | 7.2  | Yes | Yes |
| Unchecked | NA            | 71477  | 29637  | 7.2  | Yes | Yes |
| Unchecked | NA            | 99005  | 47604  | 15   | Yes | No  |
| Unchecked | NA            | 82150  | 41276  | 16.5 | Yes | Yes |
| Unchecked | NA            | 64769  | 33459  | 9    | Yes | No  |
| Unchecked | NA            | 48540  | 25609  | 4.7  | Yes | Yes |
| Unchecked | NA            | 64769  | 33459  | 9    | Yes | Yes |
| Unchecked | NA            | 132141 | 51890  | 27.7 | Yes | No  |
| Unchecked | NA            | 99124  | 63322  | 25   | Yes | Yes |
| Unchecked | NA            | 163902 | 71792  | 41.6 | No  | Yes |
| Unchecked | NA            | 79882  | 40344  | 13.9 | Yes | Yes |
| Unchecked | NA            | 111399 | 61340  | 25.7 | No  | No  |
| Unchecked | NA            | 111399 | 61340  | 25.7 | Yes | Yes |
| Unchecked | NA            | 99005  | 47604  | 15   | Yes | No  |
| Unchecked | NA            | 55145  | 22758  | 8.6  | Yes | No  |
| Unchecked | NA            | 106875 | 76078  | 24.6 | No  | Yes |
| Unchecked | NA            | 63652  | 25877  | 5.1  | Yes | No  |
| Unchecked | NA            | 44559  | 26937  | 5    | Yes | Yes |
| Unchecked | NA            | 93692  | 52725  | 19.5 | No  | Yes |
| Unchecked | NA            | 71439  | 37532  | 7.4  | Yes | Yes |
| Unchecked | NA            | 111399 | 61340  | 25.7 | Yes | Yes |
| Unchecked | NA            | 82150  | 41276  | 16.5 | Yes | Yes |
| Unchecked | NA            | 208275 | 107090 | 52.4 | No  | NA  |
| Unchecked | NA            | 111399 | 61340  | 25.7 | Yes | Yes |
| Unchecked | NA            | 111399 | 61340  | 25.7 | Yes | Yes |
| Unchecked | NA            | 76988  | 37342  | 8.4  | No  | NA  |
| Unchecked | NA            | 79882  | 40344  | 13.9 | Yes | Yes |
| Unchecked | NA            | 111399 | 61340  | 25.7 | Yes | No  |

|           |    |        |        |      |     |     |
|-----------|----|--------|--------|------|-----|-----|
| Unchecked | NA | 79882  | 40344  | 13.9 | Yes | Yes |
| Unchecked | NA | 98700  | 42809  | 17.7 | Yes | Yes |
| Unchecked | NA | 44559  | 26937  | 5    | Yes | Yes |
| Unchecked | NA | 106875 | 76078  | 24.6 | Yes | Yes |
| Unchecked | NA | 99124  | 63322  | 25   | Yes | Yes |
| Unchecked | NA | 108817 | 65058  | 22.3 | Yes | Yes |
| Unchecked | NA | 82150  | 41276  | 16.5 | Yes | Yes |
| Unchecked | NA | 44559  | 26937  | 5    | Yes | Yes |
| Unchecked | NA | 201232 | 107688 | 50.3 | Yes | Yes |
| Unchecked | NA | 74427  | 42779  | 10.4 | Yes | Yes |
| Unchecked | NA | 197321 | 58707  | 47.1 | Yes | Yes |
| Unchecked | NA | 111399 | 61340  | 25.7 | Yes | Yes |
| Unchecked | NA | 79882  | 40344  | 13.9 | Yes | No  |
| Unchecked | NA | 99124  | 63322  | 25   | Yes | Yes |
| Unchecked | NA | 152932 | 72954  | 38   | Yes | No  |
| Unchecked | NA | 99005  | 47604  | 15   | Yes | No  |
| Unchecked | NA | 201232 | 107688 | 50.3 | Yes | No  |
| Unchecked | NA | 111399 | 61340  | 25.7 | Yes | No  |
| Unchecked | NA | 44559  | 26937  | 5    | No  | Yes |
| Unchecked | NA | 79882  | 40344  | 13.9 | Yes | Yes |
| Unchecked | NA | 65435  | 58095  | 13   | Yes | Yes |
| Unchecked | NA | 54121  | 22638  | 3.6  | Yes | Yes |
| Unchecked | NA | 201232 | 107688 | 50.3 | Yes | No  |
| Unchecked | NA | 93692  | 52725  | 19.5 | Yes | Yes |
| Unchecked | NA | 47955  | 24019  | 2.7  | Yes | No  |
| Unchecked | NA | 132141 | 51890  | 27.7 | Yes | Yes |
| Unchecked | NA | 101419 | 60911  | 24.5 | Yes | Yes |
| Unchecked | NA | 138477 | 69859  | 32   | Yes | Yes |
| Unchecked | NA | 44559  | 26937  | 5    | No  | Yes |
| Unchecked | NA | 64769  | 33459  | 9    | Yes | No  |
| Checked   | NA | 108817 | 65058  | 22.3 | Yes | No  |
| Unchecked | NA | 201232 | 107688 | 50.3 | Yes | Yes |
| Unchecked | NA | 79882  | 40344  | 13.9 | Yes | Yes |
| Unchecked | NA | 132141 | 51890  | 27.7 | Yes | Yes |
| Unchecked | NA | 82150  | 41276  | 16.5 | Yes | Yes |
| Unchecked | NA | 63652  | 25877  | 5.1  | Yes | No  |
| Unchecked | NA | 111399 | 61340  | 25.7 | Yes | No  |
| Unchecked | NA | 79882  | 40344  | 13.9 | Yes | Yes |
| Unchecked | NA | 79882  | 40344  | 13.9 | Yes | Yes |
| Unchecked | NA | 79882  | 40344  | 13.9 | Yes | Yes |
| Unchecked | NA | 82150  | 41276  | 16.5 | Yes | Yes |
| Unchecked | NA | 56612  | 28845  | 4.1  | No  | NA  |
| Unchecked | NA | 82150  | 41276  | 16.5 | Yes | Yes |
| Unchecked | NA | 111399 | 61340  | 25.7 | Yes | Yes |
| Unchecked | NA | 111399 | 61340  | 25.7 | Yes | Yes |

|           |           |        |        |      |     |     |
|-----------|-----------|--------|--------|------|-----|-----|
| Unchecked | NA        | 201232 | 107688 | 50.3 | No  | NA  |
| Unchecked | NA        | 201232 | 107688 | 50.3 | Yes | Yes |
| Unchecked | NA        | 101419 | 60911  | 24.5 | Yes | Yes |
| Unchecked | NA        | 65435  | 58095  | 13   | Yes | Yes |
| Unchecked | NA        | 89858  | 36026  | 11.5 | Yes | Yes |
| Unchecked | NA        | 120846 | 70424  | 30.4 | Yes | Yes |
| Unchecked | NA        | 79882  | 40344  | 13.9 | Yes | Yes |
| Unchecked | NA        | 79882  | 40344  | 13.9 | Yes | Yes |
| Unchecked | NA        | 87760  | 44092  | 12.3 | Yes | Yes |
| Unchecked | NA        | 101419 | 60911  | 24.5 | Yes | Yes |
| Unchecked | NA        | 47955  | 24019  | 2.7  | No  | NA  |
| Unchecked | NA        | 82150  | 41276  | 16.5 | Yes | Yes |
| Unchecked | NA        | 111399 | 61340  | 25.7 | Yes | Yes |
| Unchecked | NA        | 111399 | 61340  | 25.7 | No  | NA  |
| Unchecked | NA        | 82150  | 41276  | 16.5 | Yes | Yes |
| Unchecked | NA        | 87760  | 44092  | 12.3 | Yes | Yes |
| Unchecked | NA        | 201232 | 107688 | 50.3 | Yes | Yes |
| Unchecked | NA        | 191773 | 88167  | 49   | No  | yes |
| Unchecked | NA        | 191773 | 88167  | 49   | Yes | Yes |
| Unchecked | NA        | 99124  | 63322  | 25   | Yes | Yes |
| Unchecked | NA        | 27106  | 15315  | 1.1  | Yes | Yes |
| Unchecked | NA        | 101419 | 60911  | 24.5 | Yes | Yes |
| Unchecked | NA        | 101419 | 60911  | 24.5 | Yes | Yes |
| Unchecked | NA        | 111399 | 61340  | 25.7 | Yes | Yes |
| Unchecked | NA        | 64769  | 33459  | 9    | Yes | No  |
| Unchecked | NA        | 106875 | 76078  | 24.6 | Yes | Yes |
| Unchecked | NA        | 106875 | 76078  | 24.6 | Yes | Yes |
| Unchecked | NA        | 106875 | 76078  | 24.6 | Yes | Yes |
| Unchecked | NA        | 65435  | 58095  | 13   | Yes | Yes |
| Unchecked | NA        | 177553 | 98067  | 46.7 | No  | NA  |
| Unchecked | NA        | 177553 | 98067  | 46.7 | No  | Yes |
| Unchecked | covid pna | 99124  | 63322  | 25   | Yes | Yes |
| Unchecked | NA        | 98700  | 42809  | 17.7 | Yes | Yes |
| Unchecked | NA        | 44559  | 26937  | 5    | Yes | Yes |
| Unchecked | NA        | 71439  | 37532  | 7.4  | Yes | Yes |
| Unchecked | NA        | 99005  | 47604  | 15   | Yes | Yes |
| Unchecked | NA        | 99005  | 47604  | 15   | No  | NA  |
| Unchecked | NA        | 111399 | 61340  | 25.7 | Yes | Yes |
| Unchecked | NA        | 111399 | 61340  | 25.7 | Yes | Yes |
| Unchecked | NA        | 65435  | 58095  | 13   | Yes | Yes |
| Unchecked | NA        | 79882  | 40344  | 13.9 | No  | NA  |
| Unchecked | NA        | 27420  | 15091  | 0.7  | Yes | Yes |
| Unchecked | NA        | 201232 | 107688 | 50.3 | Yes | Yes |
| Unchecked | NA        | 201232 | 107688 | 50.3 | No  | NA  |
| Unchecked | NA        | 48540  | 25609  | 4.7  | Yes | Yes |



|           |               |        |        |      |     |     |
|-----------|---------------|--------|--------|------|-----|-----|
| Unchecked | NA            | 202583 | 50139  | 50.1 | Yes | Yes |
| Unchecked | NA            | 65435  | 58095  | 13   | No  | NA  |
| Unchecked | NA            | 65435  | 58095  | 13   | No  | NA  |
| Unchecked | NA            | 208275 | 107090 | 52.4 | Yes | Yes |
| Unchecked | NA            | 117833 | 60427  | 26   | Yes | Yes |
| Unchecked | NA            | 117833 | 60427  | 26   | Yes | Yes |
| Unchecked | NA            | 71439  | 37532  | 7.4  | Yes | Yes |
| Unchecked | NA            | 82150  | 41276  | 16.5 | Yes | Yes |
| Unchecked | NA            | 132141 | 51890  | 27.7 | Yes | Yes |
| Unchecked | NA            | 108817 | 65058  | 22.3 | Yes | Yes |
| Unchecked | NA            | 201232 | 107688 | 50.3 | Yes | Yes |
| Unchecked | NA            | 79882  | 40344  | 13.9 | Yes | Yes |
| Unchecked | NA            | 58551  | 34911  | 7.3  | Yes | Yes |
| Unchecked | NA            | 73165  | 36091  | 8.3  | Yes | Yes |
| Unchecked | NA            | 111399 | 61340  | 25.7 | No  | Yes |
| Unchecked | NA            | 65435  | 58095  | 13   | Yes | Yes |
| Unchecked | NA            | 250001 | 371511 | 64.7 | Yes | Yes |
| Unchecked | NA            | 117833 | 60427  | 26   | Yes | No  |
| Unchecked | NA            | 71439  | 37532  | 7.4  | No  | Yes |
| Unchecked | NA            | 99124  | 63322  | 25   | Yes | Yes |
| Unchecked | NA            | 93692  | 52725  | 19.5 | No  | NA  |
| Unchecked | NA            | 73165  | 36091  | 8.3  | Yes | Yes |
| Unchecked | NA            | 93692  | 52725  | 19.5 | Yes | Yes |
| Unchecked | NA            | 93692  | 52725  | 19.5 | Yes | Yes |
| Unchecked | NA            | 108817 | 65058  | 22.3 | No  | No  |
| Unchecked | NA            | 76793  | 38622  | 13.1 | Yes | Yes |
| Unchecked | NA            | 65435  | 58095  | 13   | Yes | Yes |
| Unchecked | NA            | 74427  | 42779  | 10.4 | Yes | No  |
| Unchecked | NA            | 44559  | 26937  | 5    | Yes | Yes |
| Unchecked | NA            | 111399 | 61340  | 25.7 | Yes | Yes |
| Unchecked | NA            | 82150  | 41276  | 16.5 | Yes | Yes |
| Unchecked | NA            | 63652  | 25877  | 5.1  | Yes | Yes |
| Unchecked | NA            | 82150  | 41276  | 16.5 | Yes | Yes |
| Unchecked | NA            | 37015  | 19100  | 1.4  | Yes | Yes |
| Unchecked | NA            | 82150  | 41276  | 16.5 | Yes | Yes |
| Unchecked | NA            | 65435  | 58095  | 13   | Yes | Yes |
| Unchecked | NA            | 132141 | 51890  | 27.7 | Yes | Yes |
| Unchecked | COVID pneur   | 79882  | 40344  | 13.9 | Yes | Yes |
| Unchecked | covid pna     | 65435  | 58095  | 13   | Yes | Yes |
| Unchecked | Covid         | 48540  | 25609  | 4.7  | Yes | Yes |
| Unchecked | TIA           | 108817 | 65058  | 22.3 | Yes | No  |
| Unchecked | Covid-19 vira | 111399 | 61340  | 25.7 | Yes | No  |
| Unchecked | Covid         | 120846 | 70424  | 30.4 | Yes | Yes |
| Unchecked | acute hypoxi  | 120846 | 70424  | 30.4 | Yes | Yes |
| Unchecked | sacral fractu | 65435  | 58095  | 13   | Yes | Yes |

|           |                |        |        |      |     |     |
|-----------|----------------|--------|--------|------|-----|-----|
| Unchecked | Acute chf/po   | 82150  | 41276  | 16.5 | Yes | Yes |
| Unchecked | severe sepsis  | 79882  | 40344  | 13.9 | Yes | Yes |
| Unchecked | PNA/LIKELY (   | 163902 | 71792  | 41.6 | Yes | Yes |
| Unchecked | HYPOXIA SOI    | 191773 | 88167  | 49   | Yes | Yes |
| Unchecked | PNA            | 27687  | 15770  | 1.3  | Yes | Yes |
| Unchecked | COVID PNA /    | 111399 | 61340  | 25.7 | Yes | Yes |
| Unchecked | HYPONATRE      | 99005  | 47604  | 15   | Yes | Yes |
| Unchecked | COVID PNA      | 99005  | 47604  | 15   | Yes | Yes |
| Unchecked | COVID PNA,     | 120846 | 70424  | 30.4 | Yes | Yes |
| Unchecked | SEPSIS PNA     | 103239 | 66958  | 21.7 | Yes | Yes |
| Unchecked | PNA            | 65900  | 30110  | 7.6  | Yes | No  |
| Checked   | FEVER/ELEV,    | 79882  | 40344  | 13.9 | Yes | Yes |
| Unchecked | COVID PNA      | 79882  | 40344  | 13.9 | Yes | Yes |
| Unchecked | acute hypoxi   | 47955  | 24019  | 2.7  | No  | NA  |
| Unchecked | dyspnea on e   | 87760  | 44092  | 12.3 | Yes | Yes |
| Unchecked | bilateral pna  | 93692  | 52725  | 19.5 | Yes | Yes |
| Unchecked | covid pna, dk  | 65435  | 58095  | 13   | Yes | Yes |
| Unchecked | fever, chills, | 73165  | 36091  | 8.3  | Yes | Yes |
| Unchecked | hypoxic rest   | 55145  | 22758  | 8.6  | Yes | No  |
| Unchecked | alcohol withr  | 64769  | 33459  | 9    | Yes | Yes |
| Unchecked | abdominal p    | 117833 | 60427  | 26   | Yes | Yes |
| Unchecked | Nausea/Covi    | 95339  | 54487  | 19.9 | Yes | Yes |
| Unchecked | acute hypoxi   | 82150  | 41276  | 16.5 | Yes | Yes |
| Unchecked | NA             | 47955  | 24019  | 2.7  | Yes | Yes |
| Unchecked | NA             | 87760  | 44092  | 12.3 | Yes | Yes |
| Unchecked | COVID-19       | 65435  | 58095  | 13   | Yes | Yes |
| Unchecked | NA             | 111399 | 61340  | 25.7 | Yes | Yes |
| Unchecked | NA             | 79882  | 40344  | 13.9 | Yes | Yes |
| Unchecked | NA             | 99005  | 47604  | 15   | Yes | Yes |
| Unchecked | NA             | 110250 | 46367  | 20.1 | Yes | Yes |
| Unchecked | NA             | 117833 | 60427  | 26   | Yes | Yes |
| Unchecked | NA             | 82150  | 41276  | 16.5 | Yes | Yes |
| Unchecked | NA             | 64769  | 33459  | 9    | Yes | Yes |
| Unchecked | NA             | 82150  | 41276  | 16.5 | Yes | Yes |
| Unchecked | NA             | 163902 | 71792  | 41.6 | Yes | Yes |
| Unchecked | NA             | 111399 | 61340  | 25.7 | Yes | Yes |
| Unchecked | NA             | 108817 | 65058  | 22.3 | No  | Yes |
| Unchecked | NA             | 74427  | 42779  | 10.4 | Yes | Yes |
| Unchecked | NA             | 111399 | 61340  | 25.7 | Yes | No  |
| Unchecked | NA             | 106875 | 76078  | 24.6 | Yes | No  |
| Unchecked | NA             | 106875 | 76078  | 24.6 | Yes | Yes |
| Unchecked | NA             | 44559  | 26937  | 5    | Yes | Yes |
| Unchecked | NA             | 79882  | 40344  | 13.9 | Yes | Yes |
| Unchecked | NA             | 201232 | 107688 | 50.3 | Yes | Yes |
| Unchecked | NA             | 191773 | 88167  | 49   | Yes | Yes |

|           |     |        |        |      |     |     |
|-----------|-----|--------|--------|------|-----|-----|
| Unchecked | NA  | 51477  | 24043  | 3.9  | Yes | Yes |
| Unchecked | NA  | 99005  | 47604  | 15   | Yes | Yes |
| Unchecked | NA  | 79882  | 40344  | 13.9 | Yes | Yes |
| Unchecked | NA  | 47955  | 24019  | 2.7  | Yes | No  |
| Unchecked | NA  | 111399 | 61340  | 25.7 | Yes | Yes |
| Unchecked | NA  | 111399 | 61340  | 25.7 | Yes | Yes |
| Unchecked | NA  | 111399 | 61340  | 25.7 | Yes | Yes |
| Unchecked | NA  | 79882  | 40344  | 13.9 | Yes | Yes |
| Unchecked | NA  | 74796  | 34284  | 8.6  | Yes | Yes |
| Unchecked | NA  | 74427  | 42779  | 10.4 | No  | Yes |
| Unchecked | NA  | 120846 | 70424  | 30.4 | Yes | Yes |
| Unchecked | NA  | 82150  | 41276  | 16.5 | Yes | No  |
| Unchecked | NA  | 111399 | 61340  | 25.7 | No  | Yes |
| Unchecked | NA  | 201232 | 107688 | 50.3 | Yes | No  |
| Unchecked | NA  | 82150  | 41276  | 16.5 | Yes | No  |
| Unchecked | NA  | 99124  | 63322  | 25   | Yes | Yes |
| Unchecked | NA  | 82150  | 41276  | 16.5 | Yes | Yes |
| Unchecked | NA  | 82150  | 41276  | 16.5 | Yes | Yes |
| Unchecked | NA  | 117833 | 60427  | 26   | Yes | Yes |
| Unchecked | NA  | 58551  | 34911  | 7.3  | Yes | No  |
| Unchecked | NA  | 93692  | 52725  | 19.5 | No  | Yes |
| Unchecked | NA  | 111399 | 61340  | 25.7 | Yes | Yes |
| Unchecked | NA  | 99005  | 47604  | 15   | Yes | Yes |
| Unchecked | NA  | 108817 | 65058  | 22.3 | Yes | Yes |
| Unchecked | NA  | 99005  | 47604  | 15   | Yes | Yes |
| Unchecked | n/a | 99005  | 47604  | 15   | Yes | Yes |
| Unchecked | NA  | 73165  | 36091  | 8.3  | No  | Yes |
| Unchecked | NA  | 71439  | 37532  | 7.4  | Yes | Yes |
| Unchecked | NA  | 201232 | 107688 | 50.3 | Yes | Yes |
| Unchecked | NA  | 87760  | 44092  | 12.3 | Yes | Yes |
| Unchecked | NA  | 65435  | 58095  | 13   | Yes | Yes |
| Unchecked | NA  | 55145  | 22758  | 8.6  | Yes | No  |
| Unchecked | NA  | 71439  | 37532  | 7.4  | Yes | Yes |
| Unchecked | NA  | 71439  | 37532  | 7.4  | Yes | Yes |
| Unchecked | NA  | 99005  | 47604  | 15   | Yes | Yes |
| Unchecked | NA  | 99005  | 47604  | 15   | No  | Yes |
| Unchecked | NA  | 99005  | 47604  | 15   | No  | Yes |
| Unchecked | NA  | 73165  | 36091  | 8.3  | Yes | Yes |
| Unchecked | NA  | 99005  | 47604  | 15   | Yes | Yes |
| Unchecked | NA  | 111399 | 61340  | 25.7 | Yes | No  |
| Unchecked | NA  | 73165  | 36091  | 8.3  | Yes | Yes |
| Unchecked | NA  | 73165  | 36091  | 8.3  | Yes | Yes |
| Unchecked | NA  | 73165  | 36091  | 8.3  | No  | NA  |
| Unchecked | NA  | 111399 | 61340  | 25.7 | Yes | Yes |
| Unchecked | NA  | 117833 | 60427  | 26   | Yes | Yes |

|           |    |        |        |      |     |     |
|-----------|----|--------|--------|------|-----|-----|
| Unchecked | NA | 44559  | 26937  | 5    | Yes | No  |
| Unchecked | NA | 132141 | 51890  | 27.7 | Yes | No  |
| Unchecked | NA | 63652  | 25877  | 5.1  | Yes | Yes |
| Unchecked | NA | 79882  | 40344  | 13.9 | Yes | Yes |
| Unchecked | NA | 44559  | 26937  | 5    | Yes | No  |
| Unchecked | NA | 111399 | 61340  | 25.7 | Yes | Yes |
| Unchecked | NA | 177553 | 98067  | 46.7 | Yes | Yes |
| Unchecked | NA | 82150  | 41276  | 16.5 | Yes | Yes |
| Unchecked | NA | 79882  | 40344  | 13.9 | Yes | Yes |
| Unchecked | NA | 57160  | 31829  | 5.5  | Yes | Yes |
| Unchecked | NA | 0      | 0      | 0    | Yes | Yes |
| Unchecked | NA | 201232 | 107688 | 50.3 | Yes | Yes |
| Unchecked | NA | 201232 | 107688 | 50.3 | Yes | Yes |
| Unchecked | NA | 51603  | 25067  | 2.8  | Yes | Yes |
| Unchecked | NA | 58551  | 34911  | 7.3  | Yes | Yes |
| Unchecked | NA | 111399 | 61340  | 25.7 | Yes | Yes |
| Unchecked | NA | 111399 | 61340  | 25.7 | Yes | Yes |
| Unchecked | NA | 71439  | 37532  | 7.4  | Yes | Yes |
| Unchecked | NA | 64769  | 33459  | 9    | Yes | Yes |
| Unchecked | NA | 55145  | 22758  | 8.6  | Yes | Yes |
| Unchecked | NA | 55145  | 22758  | 8.6  | No  | NA  |
| Unchecked | NA | 73165  | 36091  | 8.3  | Yes | Yes |
| Unchecked | NA | 111399 | 61340  | 25.7 | Yes | Yes |
| Unchecked | NA | 99005  | 47604  | 15   | Yes | Yes |
| Unchecked | NA | 47955  | 24019  | 2.7  | Yes | Yes |
| Unchecked | NA | 191773 | 88167  | 49   | Yes | Yes |
| Unchecked | NA | 93692  | 52725  | 19.5 | Yes | Yes |
| Unchecked | NA | 93692  | 52725  | 19.5 | Yes | Yes |
| Unchecked | NA | 93692  | 52725  | 19.5 | Yes | Yes |
| Unchecked | NA | 177553 | 98067  | 46.7 | Yes | Yes |
| Unchecked | NA | 177553 | 98067  | 46.7 | Yes | Yes |
| Unchecked | NA | 111399 | 61340  | 25.7 | No  | Yes |
| Unchecked | NA | 82150  | 41276  | 16.5 | Yes | Yes |
| Unchecked | NA | 110448 | 43243  | 21.9 | Yes | Yes |
| Unchecked | NA | 44559  | 26937  | 5    | Yes | Yes |
| Unchecked | NA | 99124  | 63322  | 25   | Yes | Yes |
| Unchecked | NA | 144414 | 77158  | 38.5 | Yes | Yes |
| Unchecked | NA | 93692  | 52725  | 19.5 | Yes | No  |
| Unchecked | NA | 108817 | 65058  | 22.3 | Yes | Yes |
| Unchecked | NA | 51183  | 22873  | 3.1  | Yes | Yes |
| Unchecked | NA | 201232 | 107688 | 50.3 | Yes | Yes |
| Unchecked | NA | 111399 | 61340  | 25.7 | Yes | No  |
| Unchecked | NA | 111399 | 61340  | 25.7 | Yes | No  |
| Unchecked | NA | 201232 | 107688 | 50.3 | Yes | Yes |
| Unchecked | NA | 87760  | 44092  | 12.3 | Yes | Yes |

|           |               |        |        |      |     |     |
|-----------|---------------|--------|--------|------|-----|-----|
| Unchecked | NA            | 93692  | 52725  | 19.5 | Yes | Yes |
| Unchecked | NA            | 79882  | 40344  | 13.9 | Yes | Yes |
| Unchecked | NA            | 65435  | 58095  | 13   | Yes | Yes |
| Unchecked | NA            | 111399 | 61340  | 25.7 | Yes | No  |
| Unchecked | NA            | 93692  | 52725  | 19.5 | No  | Yes |
| Unchecked | NA            | 111399 | 61340  | 25.7 | Yes | Yes |
| Unchecked | NA            | 201232 | 107688 | 50.3 | Yes | Yes |
| Unchecked | NA            | 36046  | 17454  | 1.3  | Yes | Yes |
| Unchecked | NA            | 108817 | 65058  | 22.3 | Yes | Yes |
| Unchecked | NA            | 82150  | 41276  | 16.5 | Yes | Yes |
| Unchecked | NA            | 201232 | 107688 | 50.3 | Yes | Yes |
| Unchecked | NA            | 201232 | 107688 | 50.3 | Yes | No  |
| Unchecked | NA            | 79882  | 40344  | 13.9 | Yes | Yes |
| Unchecked | NA            | 76793  | 38622  | 13.1 | No  | NA  |
| Unchecked | NA            | 76793  | 38622  | 13.1 | Yes | Yes |
| Unchecked | NA            | 99124  | 63322  | 25   | Yes | Yes |
| Unchecked | NA            | 27420  | 15091  | 0.7  | Yes | Yes |
| Unchecked | NA            | 85707  | 49313  | 14.1 | No  | Yes |
| Unchecked | NA            | 27687  | 15770  | 1.3  | Yes | Yes |
| Unchecked | NA            | 64769  | 33459  | 9    | Yes | No  |
| Unchecked | NA            | 117833 | 60427  | 26   | Yes | Yes |
| Unchecked | NA            | 64769  | 33459  | 9    | Yes | Yes |
| Unchecked | NA            | 79882  | 40344  | 13.9 | Yes | Yes |
| Unchecked | NA            | 111399 | 61340  | 25.7 | Yes | Yes |
| Unchecked | NA            | 111399 | 61340  | 25.7 | Yes | No  |
| Unchecked | NA            | 111399 | 61340  | 25.7 | Yes | Yes |
| Unchecked | NA            | 87760  | 44092  | 12.3 | Yes | Yes |
| Unchecked | Acute hypoxe  | 71439  | 37532  | 7.4  | Yes | Yes |
| Unchecked | Acute respira | 79882  | 40344  | 13.9 | No  | No  |
| Unchecked | Acute hypoxi  | 99124  | 63322  | 25   | Yes | Yes |
| Unchecked | Acute hypoxi  | 44559  | 26937  | 5    | No  | NA  |
| Unchecked | Covid 19      | 63652  | 25877  | 5.1  | Yes | Yes |
| Unchecked | Acute CHF ex  | 71439  | 37532  | 7.4  | No  | Yes |
| Unchecked | Altered men   | 163902 | 71792  | 41.6 | No  | Yes |
| Unchecked | Covid 19      | 82150  | 41276  | 16.5 | Yes | Yes |
| Unchecked | Acute hypoxi  | 72961  | 44761  | 13.6 | Yes | Yes |
| Unchecked | Covid 19      | 28277  | 14712  | 0.8  | Yes | Yes |
| Unchecked | Acute respira | 58551  | 34911  | 7.3  | Yes | Yes |
| Unchecked | acute hypoxi  | 47955  | 24019  | 2.7  | Yes | Yes |
| Unchecked | PUI           | 76793  | 38622  | 13.1 | No  | Yes |
| Unchecked | Covid PNA     | 65435  | 58095  | 13   | Yes | Yes |
| Unchecked | Covid         | 101419 | 60911  | 24.5 | No  | NA  |
| Unchecked | Fever, PNA    | 99005  | 47604  | 15   | Yes | No  |
| Unchecked | Covid         | 82150  | 41276  | 16.5 | Yes | Yes |
| Unchecked | Covid + PNA   | 47955  | 24019  | 2.7  | Yes | Yes |

|           |               |        |       |      |     |     |
|-----------|---------------|--------|-------|------|-----|-----|
| Unchecked | Fever, probal | 99005  | 47604 | 15   | Yes | Yes |
| Unchecked | Covid + PNA   | 74796  | 34284 | 8.6  | Yes | Yes |
| Unchecked | Suspected Cc  | 63652  | 25877 | 5.1  | No  | Yes |
| Unchecked | Covid + PNA   | 64769  | 33459 | 9    | Yes | Yes |
| Unchecked | Acute hypoxe  | 79882  | 40344 | 13.9 | Yes | Yes |
| Unchecked | Covid         | 56612  | 28845 | 4.1  | Yes | Yes |
| Unchecked | Hypoxic respi | 111399 | 61340 | 25.7 | Yes | Yes |
| Unchecked | Covid + PNA   | 79882  | 40344 | 13.9 | Yes | Yes |
| Unchecked | Right trocant | 111399 | 61340 | 25.7 | Yes | Yes |
| Unchecked | Hypotension   | 111399 | 61340 | 25.7 | Yes | Yes |
| Unchecked | Acute hypoxe  | 82150  | 41276 | 16.5 | No  | Yes |
| Unchecked | Covid + PNA   | 132141 | 51890 | 27.7 | Yes | Yes |
| Unchecked | Covid PNA     | 87760  | 44092 | 12.3 | Yes | Yes |
| Unchecked | Acute Cholec  | 93692  | 52725 | 19.5 | Yes | Yes |
| Unchecked | Covid PNA     | 79882  | 40344 | 13.9 | Yes | Yes |
| Unchecked | Covid PNA     | 93692  | 52725 | 19.5 | Yes | Yes |
| Unchecked | NA            | 48540  | 25609 | 4.7  | Yes | Yes |
| Unchecked | Covid         | 79882  | 40344 | 13.9 | Yes | Yes |
| Unchecked | Covid PNA     | 101419 | 60911 | 24.5 | Yes | Yes |
| Unchecked | Fevers        | 117833 | 60427 | 26   | No  | Yes |
| Checked   | Covid         | 65435  | 58095 | 13   | Yes | Yes |
| Unchecked | Covid         | 132141 | 51890 | 27.7 | Yes | No  |
| Unchecked | Covid + PNA   | 79882  | 40344 | 13.9 | Yes | Yes |
| Unchecked | Septic shock, | 79882  | 40344 | 13.9 | Yes | Yes |
| Unchecked | Covid         | 111399 | 61340 | 25.7 | Yes | Yes |
| Unchecked | Covid + PNA   | 65435  | 58095 | 13   | Yes | Yes |
| Unchecked | Fall, Covid + | 65435  | 58095 | 13   | Yes | Yes |
| Unchecked | NA            | 111399 | 61340 | 25.7 | Yes | Yes |
| Unchecked | NA            | 87760  | 44092 | 12.3 | Yes | No  |
| Unchecked | NA            | 132141 | 51890 | 27.7 | Yes | No  |
| Unchecked | NA            | 108817 | 65058 | 22.3 | Yes | No  |
| Unchecked | NA            | 111399 | 61340 | 25.7 | Yes | Yes |
| Unchecked | NA            | 111399 | 61340 | 25.7 | Yes | Yes |
| Unchecked | Respiratory F | 50832  | 28976 | 1.6  | Yes | Yes |
| Unchecked | NA            | 93692  | 52725 | 19.5 | No  | NA  |
| Unchecked | NA            | 132141 | 51890 | 27.7 | Yes | Yes |
| Unchecked | NA            | 117833 | 60427 | 26   | No  | NA  |
| Unchecked | NA            | 110448 | 43243 | 21.9 | Yes | Yes |
| Unchecked | NA            | 102372 | 44426 | 16   | Yes | Yes |
| Unchecked | NA            | 71439  | 37532 | 7.4  | Yes | Yes |
| Unchecked | NA            | 79882  | 40344 | 13.9 | Yes | Yes |
| Unchecked | NA            | 93692  | 52725 | 19.5 | Yes | Yes |
| Unchecked | None          | 79882  | 40344 | 13.9 | Yes | Yes |
| Unchecked | NA            | 108817 | 65058 | 22.3 | Yes | Yes |
| Unchecked | NA            | 79882  | 40344 | 13.9 | Yes | Yes |

|           |    |        |        |      |     |     |
|-----------|----|--------|--------|------|-----|-----|
| Unchecked | NA | 79882  | 40344  | 13.9 | Yes | Yes |
| Unchecked | NA | 64769  | 33459  | 9    | Yes | Yes |
| Unchecked | NA | 111399 | 61340  | 25.7 | Yes | Yes |
| Checked   | NA | 105670 | 60507  | 23   | Yes | Yes |
| Unchecked | NA | 105670 | 60507  | 23   | Yes | Yes |
| Unchecked | NA | 111399 | 61340  | 25.7 | No  | Yes |
| Unchecked | NA | 79882  | 40344  | 13.9 | No  | Yes |
| Unchecked | NA | 54332  | 31059  | 6.2  | Yes | No  |
| Unchecked | NA | 79882  | 40344  | 13.9 | Yes | No  |
| Unchecked | NA | 65435  | 58095  | 13   | Yes | Yes |
| Checked   | NA | 64769  | 33459  | 9    | Yes | No  |
| Unchecked | NA | 44559  | 26937  | 5    | Yes | Yes |
| Unchecked | NA | 44559  | 26937  | 5    | Yes | No  |
| Unchecked | NA | 111399 | 61340  | 25.7 | Yes | Yes |
| Unchecked | NA | 99124  | 63322  | 25   | Yes | No  |
| Unchecked | NA | 111399 | 61340  | 25.7 | Yes | Yes |
| Unchecked | NA | 99124  | 63322  | 25   | Yes | Yes |
| Unchecked | NA | 117833 | 60427  | 26   | Yes | No  |
| Unchecked | NA | 79882  | 40344  | 13.9 | No  | NA  |
| Unchecked | NA | 51477  | 24043  | 3.9  | Yes | Yes |
| Unchecked | NA | 201232 | 107688 | 50.3 | Yes | Yes |
| Unchecked | NA | 201232 | 107688 | 50.3 | Yes | Yes |
| Unchecked | NA | 99005  | 47604  | 15   | Yes | Yes |
| Unchecked | NA | 56612  | 28845  | 4.1  | Yes | Yes |
| Unchecked | NA | 132141 | 51890  | 27.7 | Yes | Yes |
| Unchecked | NA | 132141 | 51890  | 27.7 | Yes | Yes |
| Unchecked | NA | 201232 | 107688 | 50.3 | Yes | Yes |
| Unchecked | NA | 201232 | 107688 | 50.3 | Yes | Yes |
| Unchecked | NA | 183871 | 107722 | 46.6 | Yes | Yes |
| Unchecked | NA | 99005  | 47604  | 15   | Yes | Yes |
| Unchecked | NA | 99005  | 47604  | 15   | Yes | Yes |
| Unchecked | NA | 106875 | 76078  | 24.6 | Yes | Yes |
| Unchecked | NA | 108817 | 65058  | 22.3 | Yes | Yes |
| Unchecked | NA | 105670 | 60507  | 23   | No  | Yes |
| Unchecked | NA | 76637  | 24832  | 10.8 | Yes | Yes |
| Unchecked | NA | 111399 | 61340  | 25.7 | No  | Yes |
| Unchecked | NA | 73165  | 36091  | 8.3  | Yes | Yes |
| Unchecked | NA | 63652  | 25877  | 5.1  | Yes | Yes |
| Unchecked | NA | 110448 | 43243  | 21.9 | Yes | Yes |
| Checked   | NA | 71439  | 37532  | 7.4  | Yes | No  |
| Unchecked | NA | 47955  | 24019  | 2.7  | Yes | Yes |
| Unchecked | NA | 41638  | 22755  | 2.7  | Yes | Yes |
| Unchecked | NA | 191773 | 88167  | 49   | Yes | Yes |
| Unchecked | NA | 93692  | 52725  | 19.5 | Yes | Yes |
| Unchecked | NA | 47955  | 24019  | 2.7  | Yes | Yes |

|           |              |        |        |      |     |     |
|-----------|--------------|--------|--------|------|-----|-----|
| Unchecked | NA           | 82150  | 41276  | 16.5 | Yes | Yes |
| Unchecked | NA           | 44559  | 26937  | 5    | No  | Yes |
| Unchecked | NA           | 56612  | 28845  | 4.1  | Yes | Yes |
| Checked   | A41.89 Othe  | 71439  | 37532  | 7.4  | Yes | No  |
| Unchecked | I82.432 Acut | 99124  | 63322  | 25   | No  | Yes |
| Unchecked | U07.1 COVID  | 47955  | 24019  | 2.7  | Yes | Yes |
| Unchecked | J12.89 Other | 93692  | 52725  | 19.5 | Yes | No  |
| Unchecked | U07.1 COVID  | 111399 | 61340  | 25.7 | Yes | Yes |
| Unchecked | A41.9 Sepsis | 65435  | 58095  | 13   | Yes | Yes |
| Unchecked | U07.1 COVID  | 111399 | 61340  | 25.7 | Yes | Yes |
| Unchecked | U07.1 COVID  | 111399 | 61340  | 25.7 | Yes | Yes |
| Unchecked | J15.8 Pneum  | 99005  | 47604  | 15   | Yes | Yes |
| Unchecked | I25.110 Aths | 99005  | 47604  | 15   | Yes | Yes |
| Unchecked | U07.1 COVID  | 64769  | 33459  | 9    | Yes | Yes |
| Unchecked | J95.01 Hemo  | 47955  | 24019  | 2.7  | No  | NA  |
| Unchecked | A41.89 Othe  | 44559  | 26937  | 5    | Yes | Yes |
| Unchecked | A41.89 Othe  | 133297 | 54861  | 29   | Yes | Yes |
| Unchecked | A41.9 Sepsis | 183871 | 107722 | 46.6 | No  | NA  |
| Unchecked | U07.1 COVID  | 79882  | 40344  | 13.9 | Yes | Yes |
| Unchecked | U07.1 COVID  | 183871 | 107722 | 46.6 | Yes | Yes |
| Unchecked | U07.1 COVID  | 71439  | 37532  | 7.4  | No  | NA  |
| Unchecked | A41.9 Sepsis | 201232 | 107688 | 50.3 | Yes | No  |
| Unchecked | U07.1 COVID  | 44559  | 26937  | 5    | Yes | Yes |
| Unchecked | U07.1 COVID  | 64769  | 33459  | 9    | Yes | Yes |
| Unchecked | J12.89 Other | 99005  | 47604  | 15   | Yes | Yes |
| Unchecked | U07.1 COVID  | 99005  | 47604  | 15   | Yes | Yes |
| Unchecked | U07.1 COVID  | 28277  | 14712  | 0.8  | Yes | Yes |
| Unchecked | U07.1 COVID  | 201232 | 107688 | 50.3 | Yes | Yes |
| Unchecked | A41.89 Othe  | 64769  | 33459  | 9    | Yes | Yes |
| Unchecked | U07.1 COVID  | 73165  | 36091  | 8.3  | Yes | Yes |
| Unchecked | O98.511 Oth  | 71477  | 29637  | 7.2  | Yes | Yes |
| Unchecked | A41.89 Othe  | 79882  | 40344  | 13.9 | Yes | Yes |
| Unchecked | U07.1 COVID  | 99005  | 47604  | 15   | Yes | Yes |
| Unchecked | U07.1 COVID  | 201232 | 107688 | 50.3 | No  | Yes |
| Unchecked | U07.1 COVID  | 111399 | 61340  | 25.7 | Yes | Yes |
| Unchecked | U07.1 COVID  | 99124  | 63322  | 25   | Yes | Yes |
| Unchecked | Hyponatremi  | 99124  | 63322  | 25   | Yes | Yes |
| Unchecked | U07.1 COVID  | 111399 | 61340  | 25.7 | Yes | Yes |
| Unchecked | A41.89 Othe  | 44559  | 26937  | 5    | Yes | Yes |
| Unchecked | U07.1 COVID  | 111399 | 61340  | 25.7 | Yes | Yes |
| Unchecked | U07.1 COVID  | 41278  | 35775  | 4.4  | Yes | Yes |
| Unchecked | A41.89 Othe  | 111399 | 61340  | 25.7 | Yes | Yes |
| Unchecked | D57.00 Hb-S' | 65435  | 58095  | 13   | Yes | Yes |
| Unchecked | A41.89 Othe  | 99005  | 47604  | 15   | Yes | No  |
| Unchecked | A41.89 Othe  | 64769  | 33459  | 9    | Yes | Yes |



|           |              |        |        |      |     |     |
|-----------|--------------|--------|--------|------|-----|-----|
| Unchecked | U07.1 COVID  | 64769  | 33459  | 9    | No  | NA  |
| Unchecked | J15.9 Unspec | 44559  | 26937  | 5    | Yes | Yes |
| Unchecked | S72.141A Dis | 85707  | 49313  | 14.1 | Yes | Yes |
| Unchecked | A41.89 Othe  | 201232 | 107688 | 50.3 | Yes | Yes |
| Checked   | U07.1 COVID  | 71439  | 37532  | 7.4  | Yes | Yes |
| Unchecked | J12.89 Other | 130452 | 119276 | 33   | Yes | Yes |
| Unchecked | A41.89 Othe  | 103750 | 51452  | 23.6 | Yes | Yes |
| Unchecked | R58 Hemorrh  | 111399 | 61340  | 25.7 | No  | Yes |
| Unchecked | U07.1 COVID  | 47955  | 24019  | 2.7  | Yes | Yes |
| Unchecked | S52.022A Dis | 79882  | 40344  | 13.9 | Yes | Yes |
| Unchecked | U07.1 COVID  | 117833 | 60427  | 26   | Yes | Yes |
| Unchecked | A41.89 Othe  | 132141 | 51890  | 27.7 | Yes | Yes |
| Unchecked | J12.89 Other | 50832  | 28976  | 1.6  | Yes | Yes |
| Unchecked | U07.1 COVID  | 201232 | 107688 | 50.3 | Yes | Yes |
| Unchecked | U07.1 COVID  | 48540  | 25609  | 4.7  | No  | NA  |
| Unchecked | A41.89 Othe  | 98700  | 42809  | 17.7 | Yes | Yes |
| Unchecked | U07.1 COVID  | 111399 | 61340  | 25.7 | Yes | Yes |
| Unchecked | U07.1 COVID  | 201232 | 107688 | 50.3 | Yes | Yes |
| Unchecked | U07.1 COVID  | 71439  | 37532  | 7.4  | Yes | Yes |
| Unchecked | A41.89 Othe  | 44559  | 26937  | 5    | Yes | Yes |
| Unchecked | A41.89 Othe  | 44559  | 26937  | 5    | Yes | Yes |
| Checked   | J12.89 Other | 79882  | 40344  | 13.9 | Yes | Yes |
| Unchecked | A41.89 Othe  | 55145  | 22758  | 8.6  | No  | NA  |
| Unchecked | U07.1 COVID  | 99124  | 63322  | 25   | Yes | Yes |
| Unchecked | A41.89 Othe  | 101419 | 60911  | 24.5 | Yes | Yes |
| Unchecked | A41.89 Othe  | 44559  | 26937  | 5    | No  | NA  |
| Unchecked | A41.89 Othe  | 93692  | 52725  | 19.5 | Yes | Yes |
| Unchecked | A41.89 Othe  | 82150  | 41276  | 16.5 | Yes | Yes |
| Unchecked | J12.89 Other | 30977  | 16098  | 1.4  | Yes | Yes |
| Unchecked | T79.6XXA Tra | 99124  | 63322  | 25   | Yes | Yes |
| Unchecked | U07.1 COVID  | 58551  | 34911  | 7.3  | Yes | Yes |
| Unchecked | U07.1 COVID  | 65435  | 58095  | 13   | Yes | Yes |
| Unchecked | A41.89 Othe  | 111399 | 61340  | 25.7 | Yes | Yes |
| Unchecked | A41.89 Othe  | 47955  | 24019  | 2.7  | Yes | Yes |
| Unchecked | U07.1 COVID  | 99124  | 63322  | 25   | Yes | Yes |
| Unchecked | D59.1 Other  | 99124  | 63322  | 25   | Yes | Yes |
| Unchecked | J45.901 Unsp | 79882  | 40344  | 13.9 | Yes | Yes |
| Unchecked | A41.89 Othe  | 82150  | 41276  | 16.5 | Yes | Yes |
| Unchecked | U07.1 COVID  | 48540  | 25609  | 4.7  | No  | NA  |
| Unchecked | A41.89 Othe  | 99005  | 47604  | 15   | No  | NA  |
| Unchecked | U07.1 COVID  | 99005  | 47604  | 15   | Yes | Yes |
| Unchecked | U07.1 COVID  | 87760  | 44092  | 12.3 | Yes | Yes |
| Unchecked | A41.89 Othe  | 48540  | 25609  | 4.7  | Yes | Yes |
| Unchecked | A41.89 Othe  | 108817 | 65058  | 22.3 | Yes | Yes |
| Unchecked | O34.211 Mat  | 99005  | 47604  | 15   | Yes | Yes |

|           |              |        |        |      |     |     |
|-----------|--------------|--------|--------|------|-----|-----|
| Unchecked | A41.89 Othe  | 87760  | 44092  | 12.3 | Yes | Yes |
| Unchecked | J12.89 Other | 79882  | 40344  | 13.9 | No  | NA  |
| Unchecked | J12.89 Other | 79882  | 40344  | 13.9 | Yes | Yes |
| Unchecked | J12.89 Other | 201232 | 107688 | 50.3 | Yes | No  |
| Unchecked | U07.1 COVID  | 138477 | 69859  | 32   | Yes | Yes |
| Unchecked | A41.89 Othe  | 44559  | 26937  | 5    | Yes | Yes |
| Unchecked | A41.89 Othe  | 44559  | 26937  | 5    | Yes | Yes |
| Unchecked | A41.89 Othe  | 76793  | 38622  | 13.1 | Yes | Yes |
| Unchecked | A41.89 Othe  | 44559  | 26937  | 5    | Yes | Yes |
| Unchecked | U07.1 COVID  | 82150  | 41276  | 16.5 | Yes | Yes |
| Unchecked | U07.1 COVID  | 64769  | 33459  | 9    | Yes | Yes |
| Unchecked | A41.89 Othe  | 98700  | 42809  | 17.7 | Yes | Yes |
| Unchecked | A41.89 Othe  | 65435  | 58095  | 13   | No  | NA  |
| Unchecked | U07.1 COVID  | 44559  | 26937  | 5    | No  | NA  |
| Unchecked | U07.1 COVID  | 65435  | 58095  | 13   | Yes | Yes |
| Unchecked | J12.89 Other | 56612  | 28845  | 4.1  | Yes | Yes |
| Unchecked | N17.9 Acute  | 34016  | 29103  | 5.3  | No  | Yes |
| Unchecked | U07.1 COVID  | 99124  | 63322  | 25   | No  | NA  |
| Unchecked | U07.1 COVID  | 110448 | 43243  | 21.9 | No  | NA  |
| Unchecked | I95.9 Hypote | 65435  | 58095  | 13   | No  | Yes |
| Unchecked | U07.1 COVID  | 65435  | 58095  | 13   | Yes | Yes |
| Unchecked | R50.9 Fever, | 99005  | 47604  | 15   | Yes | Yes |
| Unchecked | U07.1 COVID  | 27687  | 15770  | 1.3  | No  | Yes |
| Unchecked | U07.1 COVID  | 82150  | 41276  | 16.5 | Yes | Yes |
| Checked   | J12.89 Other | 82150  | 41276  | 16.5 | Yes | Yes |
| Unchecked | NA           | 102848 | 44371  | 17.5 | Yes | Yes |
| Unchecked | NA           | 99005  | 47604  | 15   | Yes | Yes |
| Unchecked | NA           | 79882  | 40344  | 13.9 | Yes | Yes |
| Unchecked | NA           | 99005  | 47604  | 15   | Yes | Yes |
| Unchecked | NA           | 65435  | 58095  | 13   | Yes | Yes |
| Checked   | NA           | 37015  | 19100  | 1.4  | Yes | Yes |
| Unchecked | NA           | 63652  | 25877  | 5.1  | Yes | Yes |
| Unchecked | NA           | 48540  | 25609  | 4.7  | No  | Yes |
| Unchecked | NA           | 117833 | 60427  | 26   | Yes | Yes |
| Unchecked | NA           | 111399 | 61340  | 25.7 | Yes | Yes |
| Unchecked | NA           | 99005  | 47604  | 15   | Yes | Yes |
| Unchecked | NA           | 93692  | 52725  | 19.5 | Yes | Yes |
| Unchecked | NA           | 99124  | 63322  | 25   | No  | Yes |
| Unchecked | na           | 99005  | 47604  | 15   | Yes | No  |
| Unchecked | NA           | 111399 | 61340  | 25.7 | Yes | Yes |
| Unchecked | NA           | 47955  | 24019  | 2.7  | Yes | Yes |
| Unchecked | NA           | 64769  | 33459  | 9    | Yes | Yes |
| Unchecked | NA           | 74427  | 42779  | 10.4 | Yes | Yes |
| Unchecked | NA           | 99124  | 63322  | 25   | Yes | No  |
| Unchecked | NA           | 64769  | 33459  | 9    | Yes | Yes |

|           |    |        |        |      |     |     |
|-----------|----|--------|--------|------|-----|-----|
| Unchecked | NA | 110448 | 43243  | 21.9 | Yes | Yes |
| Unchecked | NA | 110650 | 49542  | 21.7 | Yes | Yes |
| Unchecked | NA | 93692  | 52725  | 19.5 | Yes | Yes |
| Unchecked | NA | 40449  | 24714  | 4.3  | Yes | Yes |
| Unchecked | NA | 108817 | 65058  | 22.3 | Yes | Yes |
| Unchecked | NA | 99124  | 63322  | 25   | Yes | No  |
| Unchecked | NA | 163902 | 71792  | 41.6 | Yes | Yes |
| Unchecked | NA | 91386  | 35252  | 9.6  | Yes | Yes |
| Unchecked | NA | 183871 | 107722 | 46.6 | No  | Yes |
| Unchecked | NA | 117833 | 60427  | 26   | Yes | Yes |
| Unchecked | NA | 65435  | 58095  | 13   | No  | Yes |
| Unchecked | NA | 44559  | 26937  | 5    | Yes | Yes |
| Unchecked | NA | 108817 | 65058  | 22.3 | Yes | Yes |
| Unchecked | NA | 111399 | 61340  | 25.7 | Yes | Yes |
| Unchecked | NA | 65435  | 58095  | 13   | No  | Yes |
| Unchecked | NA | 45903  | 26510  | 2.9  | Yes | Yes |
| Unchecked | NA | 99005  | 47604  | 15   | Yes | Yes |
| Unchecked | NA | 64500  | 42439  | 15.7 | No  | Yes |
| Unchecked | NA | 87760  | 44092  | 12.3 | Yes | Yes |
| Unchecked | NA | 87760  | 44092  | 12.3 | Yes | Yes |
| Unchecked | NA | 108817 | 65058  | 22.3 | Yes | Yes |
| Unchecked | NA | 108817 | 65058  | 22.3 | Yes | Yes |
| Unchecked | NA | 65435  | 58095  | 13   | Yes | Yes |
| Checked   | NA | 73165  | 36091  | 8.3  | Yes | Yes |
| Checked   | NA | 52409  | 25705  | 2    | Yes | Yes |
| Unchecked | NA | 52538  | 31978  | 6.2  | Yes | No  |
| Unchecked | NA | 82150  | 41276  | 16.5 | Yes | Yes |
| Unchecked | NA | 183871 | 107722 | 46.6 | Yes | Yes |
| Unchecked | NA | 177553 | 98067  | 46.7 | No  | Yes |
| Unchecked | NA | 99005  | 47604  | 15   | Yes | Yes |
| Unchecked | NA | 111399 | 61340  | 25.7 | Yes | No  |
| Unchecked | NA | 44559  | 26937  | 5    | Yes | Yes |
| Unchecked | NA | 99124  | 63322  | 25   | Yes | Yes |
| Unchecked | NA | 61336  | 26198  | 5.4  | No  | NA  |
| Unchecked | NA | 63652  | 25877  | 5.1  | No  | NA  |
| Unchecked | NA | 111399 | 61340  | 25.7 | Yes | Yes |
| Unchecked | NA | 79882  | 40344  | 13.9 | No  | Yes |
| Checked   | NA | 52538  | 31978  | 6.2  | Yes | Yes |
| Unchecked | NA | 57160  | 31829  | 5.5  | Yes | No  |
| Unchecked | NA | 163902 | 71792  | 41.6 | Yes | Yes |
| Unchecked | NA | 79882  | 40344  | 13.9 | Yes | Yes |
| Unchecked | NA | 79882  | 40344  | 13.9 | Yes | Yes |
| Unchecked | NA | 44559  | 26937  | 5    | Yes | Yes |
| Unchecked | NA | 109250 | 94979  | 31.1 | Yes | Yes |
| Unchecked | NA | 63652  | 25877  | 5.1  | Yes | Yes |

|           |     |        |       |      |     |     |
|-----------|-----|--------|-------|------|-----|-----|
| Unchecked | n/a | 48540  | 25609 | 4.7  | Yes | Yes |
| Unchecked | n/a | 79882  | 40344 | 13.9 | Yes | Yes |
| Unchecked | n/a | 79882  | 40344 | 13.9 | Yes | Yes |
| Unchecked | n/a | 79882  | 40344 | 13.9 | No  | Yes |
| Unchecked | n/a | 132141 | 51890 | 27.7 | Yes | Yes |
| Unchecked | n/a | 47955  | 24019 | 2.7  | Yes | Yes |
| Unchecked | n/a | 26801  | 40090 | 1.2  | Yes | Yes |

|                |           |           |           |                |         |
|----------------|-----------|-----------|-----------|----------------|---------|
| NA             | Checked   | Unchecked | Unchecked | 1 Home         | Home    |
| NA             | Unchecked | Unchecked | Checked   | 3 Home         | Home    |
| NA             | Unchecked | Unchecked | Unchecked | 3 Home         | Home    |
| NA             | Unchecked | Unchecked | Unchecked | 2 Home         | Home    |
| NA             | Checked   | Unchecked | Unchecked | 6 Burke Rehab  | Rehab   |
| NA             | Checked   | Unchecked | Checked   | 11 Expired     | Expired |
| NA             | Checked   | Unchecked | Unchecked | 9 Home         | Home    |
| NA             | Checked   | Unchecked | Unchecked | 6 Home Health  | Home    |
| NA             | Checked   | Unchecked | Unchecked | 3 Home Health  | Home    |
| NA             | Checked   | Unchecked | Unchecked | 0 Home         | Home    |
| NA             | Checked   | Unchecked | Unchecked | 4 Home         | Home    |
| NA             | Checked   | Unchecked | Checked   | 10 Home        | Home    |
| This is an inc | Unchecked | Checked   | Unchecked | 21 Death       | Expired |
| NA             | Checked   | Unchecked | Checked   | 7 Rehab        | Rehab   |
| NA             | Checked   | Unchecked | Unchecked | 3 Home         | Home    |
| NA             | Checked   | Unchecked | Unchecked | 4 Home         | Home    |
| NA             | Checked   | Unchecked | Unchecked | 6 Home         | Home    |
| NA             | Checked   | Unchecked | Unchecked | 6 Home Health  | Home    |
| NA             | Unchecked | Unchecked | Checked   | 2 Home         | Home    |
| NA             | Unchecked | Checked   | Checked   | 10 Expired     | Expired |
| NA             | Checked   | Unchecked | Checked   | 5 Home         | Home    |
| NA             | Checked   | Checked   | Unchecked | 15 Expired     | Expired |
| NA             | Checked   | Unchecked | Unchecked | 12 Expired     | Expired |
| NA             | Unchecked | Unchecked | Checked   | 9 SNF          | SNF     |
| NA             | Checked   | Unchecked | Unchecked | 3 Home         | Home    |
| NA             | Checked   | Unchecked | Unchecked | 3 Home Health  | Home    |
| NA             | Checked   | Checked   | Unchecked | 15 Home Health | Home    |
| NA             | Unchecked | Unchecked | Checked   | 19 Home        | Home    |
| NA             | Unchecked | Checked   | Checked   | 20 SNF         | SNF     |
| NA             | Checked   | Unchecked | Unchecked | 2 Home         | Home    |
| NA             | Unchecked | Unchecked | Checked   | 4 home         | Home    |
| NA             | Checked   | Unchecked | Unchecked | 2 Home         | Home    |
| NA             | Checked   | Unchecked | Unchecked | 23 Hospice Med | Hospice |
| NA             | Checked   | Unchecked | Unchecked | 9 Home         | Home    |
| NA             | Unchecked | Checked   | Checked   | 8 Expired      | Expired |
| This is an inc | Checked   | Unchecked | Unchecked | 5 Home         | Home    |
| NA             | Checked   | Unchecked | Unchecked | 2 Home         | Home    |
| This is a reac | Checked   | Unchecked | Unchecked | 2 Home         | Home    |
| NA             | Checked   | Unchecked | Unchecked | 12 Home Health | Home    |
| NA             | Checked   | Unchecked | Unchecked | 23 Expired     | Expired |
| NA             | Unchecked | Unchecked | Unchecked | 5 Home Health  | Home    |
| This is a reac | Checked   | Unchecked | Unchecked | 8 SNF          | SNF     |
| NA             | Unchecked | Unchecked | Checked   | 4 Home         | Home    |
| NA             | Checked   | Unchecked | Unchecked | 24 SNF         | SNF     |
| NA             | Checked   | Unchecked | Checked   | 4 Home         | Home    |

|                |           |           |           |    |                 |         |
|----------------|-----------|-----------|-----------|----|-----------------|---------|
| This is an inc | Checked   | Unchecked | Unchecked | 4  | ROUTINE/HC Home |         |
| NA             | Checked   | Unchecked | Unchecked | 4  | ROUTINE/HC Home |         |
| NA             | Checked   | Unchecked | Unchecked | 3  | SKILLED NUR SNF |         |
| NA             | Unchecked | Unchecked | Checked   | 5  | Expired         | Expired |
| NA             | Checked   | Unchecked | Unchecked | 3  | ROUTINE/HC Home |         |
| NA             | Checked   | Unchecked | Unchecked | 1  | SKILLED NUR SNF |         |
| This is a reac | Checked   | Unchecked | Unchecked | 7  | Psychiatric fa  | PSYCH   |
| NA             | Checked   | Unchecked | Unchecked | 31 | Home            | Home    |
| NA             | Unchecked | Unchecked | Unchecked | 11 | Home            | Home    |
| NA             | Checked   | Unchecked | Unchecked | 4  | Home            | Home    |
| NA             | Checked   | Unchecked | Unchecked | 5  | Home            | Home    |
| NA             | Checked   | Unchecked | Checked   | 2  | Psych hospit    | PSYCH   |
| NA             | Unchecked | Checked   | Checked   | 13 | Expired         | Expired |
| NA             | Checked   | Unchecked | Unchecked | 1  | Home            | Home    |
| NA             | Checked   | Unchecked | Unchecked | 5  | Expired         | Expired |
| NA             | Checked   | Unchecked | Unchecked | 12 | Expired         | Expired |
| NA             | Checked   | Unchecked | Unchecked | 6  | Home            | Home    |
| NA             | Unchecked | Unchecked | Checked   | 3  | Expired         | Expired |
| NA             | Checked   | Unchecked | Unchecked | 2  | Home            | Home    |
| NA             | Checked   | Unchecked | Unchecked | 11 | Home            | Home    |
| This is an inc | Checked   | Unchecked | Unchecked | 6  | home            | Home    |
| NA             | Checked   | Checked   | Unchecked | 23 | Expired         | Expired |
| NA             | Checked   | Checked   | Checked   | 10 | Expired         | Expired |
| NA             | Checked   | Unchecked | Unchecked | 5  | Home            | Home    |
| NA             | Checked   | Unchecked | Unchecked | 9  | Home            | Home    |
| NA             | Checked   | Unchecked | Checked   | 8  | in patient rel  | Rehab   |
| NA             | Checked   | Unchecked | Unchecked | 6  | in patient rel  | Rehab   |
| NA             | Checked   | Checked   | Checked   | 6  | Home            | Home    |
| This is an inc | Checked   | Unchecked | Unchecked | 3  | Home            | Home    |
| NA             | Checked   | Unchecked | Checked   | 24 | Home            | Home    |
| NA             | Checked   | Unchecked | Checked   | 4  | in patient rel  | Rehab   |
| NA             | Checked   | Unchecked | Unchecked | 2  | Home            | Home    |
| This is an inc | Checked   | Unchecked | Unchecked | 8  | SNF             | SNF     |
| NA             | Checked   | Checked   | Unchecked | 9  | Expired         | Expired |
| NA             | Checked   | Unchecked | Unchecked | 11 | SNF             | SNF     |
| This is an inc | Checked   | Unchecked | Unchecked | 8  | in patient rel  | Rehab   |
| This is a reac | Checked   | Unchecked | Unchecked | 8  | Expired         | Expired |
| NA             | Checked   | Checked   | Unchecked | 12 | Expired         | Expired |
| NA             | Checked   | Unchecked | Unchecked | 5  | Psychiatric h   | PSYCH   |
| NA             | Unchecked | Unchecked | Checked   | 3  | in patient rel  | Rehab   |
| NA             | Checked   | Unchecked | Unchecked | 3  | Home            | Home    |
| NA             | Checked   | Unchecked | Unchecked | 3  | home            | Home    |
| NA             | Unchecked | Unchecked | Checked   | 12 | SNF             | SNF     |
| NA             | Checked   | Unchecked | Unchecked | 6  | Expired         | Expired |
| NA             | Checked   | Unchecked | Unchecked | 3  | Expired         | Expired |

|                |           |           |           |    |                |          |
|----------------|-----------|-----------|-----------|----|----------------|----------|
| NA             | Checked   | Unchecked | Unchecked | 3  | Expired        | Expired  |
| NA             | Unchecked | Checked   | Checked   | 11 | Expired        | Expired  |
| This is an inc | Checked   | Unchecked | Checked   | 16 | Expired        | Expired  |
| NA             | Checked   | Unchecked | Unchecked | 12 | SNF            | SNF      |
| NA             | Checked   | Unchecked | Checked   | 17 | SNF            | SNF      |
| NA             | Checked   | Unchecked | Unchecked | 3  | Home           | Home     |
| NA             | Checked   | Unchecked | Unchecked | 6  | Home           | Home     |
| NA             | Checked   | Unchecked | Unchecked | 2  | Expired        | Expired  |
| NA             | Checked   | Unchecked | Checked   | 2  | Home           | Home     |
| This is an inc | Checked   | Unchecked | Unchecked | 8  | SNF            | SNF      |
| This is an inc | Unchecked | Unchecked | Checked   | 1  | Home           | Home     |
| NA             | Checked   | Unchecked | Unchecked | 1  | NYP in patier  | Psych    |
| NA             | Checked   | Unchecked | Checked   | 3  | Home           | Home     |
| NA             | Checked   | Unchecked | Unchecked | 8  | Expired        | Expired  |
| NA             | Checked   | Unchecked | Unchecked | 1  | Home           | Home     |
| NA             | Checked   | Unchecked | Unchecked | 2  | SNF            | SNF      |
| NA             | Checked   | Unchecked | Unchecked | 2  | Home           | Home     |
| NA             | Checked   | Unchecked | Checked   | 6  | Assisted livir | AL       |
| This is an inc | Checked   | Unchecked | Checked   | 13 | Home           | Home     |
| NA             | Checked   | Unchecked | Unchecked | 3  | Home Healthr   | Home     |
| NA             | Checked   | Unchecked | Unchecked | 3  | Other- group   | Home     |
| NA             | Checked   | Unchecked | Unchecked | 5  | Home Healthr   | Home     |
| NA             | Checked   | Unchecked | Unchecked | 12 | SNF            | SNF      |
| NA             | Checked   | Unchecked | Checked   | 4  | Home/Self C    | Home     |
| NA             | Unchecked | Unchecked | Checked   | 12 | XFER Other     | Transfer |
| NA             | Unchecked | Unchecked | Checked   | 6  | Inpt Rehab F   | Rehab    |
| NA             | Unchecked | Checked   | Unchecked | 29 | Other acute :  | SNF      |
| NA             | Checked   | Unchecked | Unchecked | 6  | Home, Self C   | Home     |
| NA             | Checked   | Unchecked | Unchecked | 4  | Home           | Home     |
| NA             | Checked   | Unchecked | Unchecked | 13 | Home Healthr   | Home     |
| NA             | Checked   | Checked   | Checked   | 26 | Expired        | Expired  |
| NA             | Checked   | Unchecked | Checked   | 7  | Rehab          | Rehab    |
| NA             | Checked   | Unchecked | Checked   | 8  | Expired        | Expired  |
| NA             | Checked   | Unchecked | Unchecked | 3  | Home, Self C   | Home     |
| NA             | Unchecked | Unchecked | Checked   | 10 | Xfer Other     | Transfer |
| NA             | Checked   | Unchecked | Unchecked | 9  | Other Acute    | SNF      |
| NA             | Checked   | Unchecked | Unchecked | 7  | Other Acute    | SNF      |
| NA             | Checked   | Unchecked | Unchecked | 0  | Home, Self C   | Home     |
| NA             | Unchecked | Checked   | Unchecked | 18 | Other Acute    | SNF      |
| NA             | Checked   | Unchecked | Unchecked | 4  | Home, Self C   | Home     |
| NA             | Unchecked | Unchecked | Checked   | 14 | Home Healthr   | Home     |
| NA             | Checked   | Unchecked | Unchecked | 3  | Home Healthr   | Home     |
| NA             | Unchecked | Unchecked | Checked   | 11 | Home Healthr   | Home     |
| NA             | Checked   | Unchecked | Unchecked | 3  | Home, Self C   | Home     |
| NA             | Checked   | Unchecked | Unchecked | 4  | home           | Home     |

|                |           |           |           |    |             |          |
|----------------|-----------|-----------|-----------|----|-------------|----------|
| This is an inc | Checked   | Unchecked | Unchecked | 2  | Home        | Home     |
| NA             | Checked   | Unchecked | Unchecked | 1  | NA          | NA       |
| This is an inc | Checked   | Unchecked | Unchecked | 3  | home        | Home     |
| NA             | Checked   | Unchecked | Unchecked | 11 | Inpt rehab  | Rehab    |
| NA             | Checked   | Unchecked | Unchecked | 6  | home        | Home     |
| NA             | Checked   | Unchecked | Unchecked | 11 | Home Health | Home     |
| NA             | Checked   | Unchecked | Unchecked | 1  | Expired     | Expired  |
| NA             | Checked   | Unchecked | Unchecked | 14 | Rehab       | Rehab    |
| NA             | Checked   | Unchecked | Unchecked | 3  | Home        | Home     |
| NA             | Checked   | Unchecked | Unchecked | 10 | Home        | Home     |
| NA             | Checked   | Unchecked | Unchecked | 2  | AMA         | AMA      |
| NA             | Checked   | Unchecked | Unchecked | 5  | Home        | Home     |
| NA             | Checked   | Unchecked | Unchecked | 13 | Home        | Home     |
| NA             | Checked   | Checked   | Checked   | 23 | Expired     | Expired  |
| NA             | Checked   | Unchecked | Unchecked | 4  | Home        | Home     |
| NA             | Checked   | Checked   | Unchecked | 12 | Expired     | Expired  |
| NA             | Unchecked | Unchecked | Checked   | 3  | Home        | Home     |
| NA             | Checked   | Unchecked | Checked   | 18 | Home Health | Home     |
| NA             | Checked   | Unchecked | Unchecked | 15 | Home Health | Home     |
| NA             | Checked   | Unchecked | Checked   | 9  | SNF         | SNF      |
| NA             | Checked   | Unchecked | Unchecked | 4  | Home        | Home     |
| NA             | Unchecked | Unchecked | Checked   | 4  | Home        | Home     |
| NA             | Checked   | Unchecked | Unchecked | 6  | SNF         | SNF      |
| NA             | Checked   | Unchecked | Checked   | 6  | Expired     | Expired  |
| NA             | Checked   | Unchecked | Unchecked | 5  | Expired     | Expired  |
| NA             | Checked   | Unchecked | Unchecked | 2  | Home        | Home     |
| NA             | Checked   | Unchecked | Unchecked | 5  | Expired     | Expired  |
| NA             | Unchecked | Unchecked | Checked   | 2  | Home        | Home     |
| NA             | Checked   | Unchecked | Unchecked | 3  | home        | Home     |
| NA             | Checked   | Unchecked | Unchecked | 2  | expired     | Expired  |
| NA             | Checked   | Unchecked | Unchecked | 4  | home        | Home     |
| NA             | Checked   | Unchecked | Unchecked | 1  | home        | Home     |
| NA             | Checked   | Unchecked | Unchecked | 9  | home        | Home     |
| NA             | Checked   | Unchecked | Unchecked | 7  | home        | Home     |
| NA             | Unchecked | Checked   | Checked   | 8  | ACUTE Care  | Transfer |
| NA             | Unchecked | Unchecked | Checked   | 8  | Expired     | Expired  |
| NA             | Unchecked | Unchecked | Checked   | 18 | Expired     | Expired  |
| NA             | Checked   | Unchecked | Unchecked | 10 | Expired     | Expired  |
| NA             | Unchecked | Unchecked | Checked   | 2  | home        | Home     |
| This is a reac | Checked   | Unchecked | Unchecked | 1  | Home        | Home     |
| NA             | Checked   | Unchecked | Unchecked | 6  | Home        | Home     |
| NA             | Checked   | Unchecked | Checked   | 1  | Home        | Home     |
| NA             | Checked   | Unchecked | Unchecked | 6  | Home        | Home     |
| NA             | Unchecked | Unchecked | Checked   | 21 | SNF         | SNF      |
| NA             | Checked   | Unchecked | Unchecked | 5  | Expired     | Expired  |



|                |           |           |           |    |              |          |
|----------------|-----------|-----------|-----------|----|--------------|----------|
| NA             | Checked   | Unchecked | Checked   | 4  | Home         | Home     |
| NA             | Checked   | Checked   | Unchecked | 2  | Expired      | Expired  |
| NA             | Checked   | Unchecked | Unchecked | 1  | AMA          | AMA      |
| This is a reac | Unchecked | Unchecked | Unchecked | 1  | AMA          | AMA      |
| This is a reac | Checked   | Unchecked | Unchecked | 1  | Emergency h  | Home     |
| NA             | Checked   | Unchecked | Unchecked | 4  | Home         | Home     |
| NA             | Checked   | Checked   | Checked   | 38 | XFER TO PHY  | Rehab    |
| NA             | Checked   | Unchecked | Unchecked | 3  | SKILLED NUR  | SNF      |
| NA             | Checked   | Unchecked | Unchecked | 3  | SKILLED NUR  | SNF      |
| NA             | Unchecked | Checked   | Unchecked | 52 | Expired      | Expired  |
| NA             | Checked   | Unchecked | Unchecked | 10 | Expired      | Expired  |
| NA             | Unchecked | Checked   | Checked   | 14 | Rehab        | Rehab    |
| NA             | Checked   | Unchecked | Unchecked | 2  | Home         | Home     |
| NA             | Unchecked | Checked   | Unchecked | 13 | Expired      | Expired  |
| NA             | Unchecked | Unchecked | Unchecked | 6  | Home         | Home     |
| NA             | Checked   | Unchecked | Unchecked | 6  | Home         | Home     |
| NA             | Checked   | Unchecked | Unchecked | 4  | NA           | NA       |
| NA             | Checked   | Unchecked | Unchecked | 2  | Home         | Home     |
| This is an inc | Checked   | Unchecked | Unchecked | 1  | Home         | Home     |
| This is an inc | Unchecked | Unchecked | Checked   | 4  | Home         | Home     |
| NA             | Unchecked | Unchecked | Unchecked | 2  | Home         | Home     |
| NA             | Checked   | Unchecked | Unchecked | 7  | home         | Home     |
| NA             | Unchecked | Checked   | Unchecked | 13 | expired      | Expired  |
| NA             | Checked   | Unchecked | Unchecked | 1  | SNF          | SNF      |
| NA             | Checked   | Unchecked | Unchecked | 3  | Hospice-Horr | Hospice  |
| NA             | Unchecked | Unchecked | Unchecked | 10 | Home         | Home     |
| NA             | Unchecked | Checked   | Unchecked | 8  | Expired      | Expired  |
| NA             | Unchecked | Unchecked | Checked   | 2  | Home, Self C | Home     |
| NA             | Unchecked | Checked   | Checked   | 29 | Expired      | Expired  |
| NA             | Checked   | Checked   | Checked   | 20 | Expired      | Expired  |
| NA             | Unchecked | Unchecked | Checked   | 4  | Expired      | Expired  |
| NA             | Checked   | Unchecked | Unchecked | 11 | Home Health  | Home     |
| NA             | Checked   | Unchecked | Unchecked | 25 | Other Acute  | SNF      |
| NA             | Checked   | Unchecked | Unchecked | 3  | Xfer Other   | Transfer |
| NA             | Checked   | Unchecked | Unchecked | 15 | Xfer Other   | Transfer |
| This is an inc | Checked   | Unchecked | Unchecked | 4  | Xfer Other   | Transfer |
| NA             | Checked   | Unchecked | Unchecked | 2  | Home, Self C | Home     |
| This is a reac | Checked   | Unchecked | Unchecked | 10 | Other Acute  | SNF      |
| This is an inc | Unchecked | Unchecked | Checked   | 6  | Home Health  | Home     |
| NA             | Checked   | Unchecked | Unchecked | 3  | home         | Home     |
| NA             | Checked   | Unchecked | Unchecked | 1  | Home         | Home     |
| NA             | Checked   | Checked   | Unchecked | 15 | acute care h | Transfer |
| NA             | Unchecked | Unchecked | Checked   | 5  | Expired      | Expired  |
| NA             | Unchecked | Unchecked | Checked   | 3  | home         | Home     |
| NA             | Checked   | Unchecked | Unchecked | 3  | Inpt Rehab   | Rehab    |

|                |           |           |           |                   |          |
|----------------|-----------|-----------|-----------|-------------------|----------|
| NA             | Unchecked | Checked   | Unchecked | 0 expired         | Expired  |
| NA             | Checked   | Unchecked | Unchecked | 3 home            | Home     |
| NA             | Unchecked | Unchecked | Unchecked | 3 home group      | Home     |
| NA             | Checked   | Unchecked | Checked   | 8 expired         | Expired  |
| NA             | Checked   | Unchecked | Unchecked | 9 home            | Home     |
| NA             | Unchecked | Checked   | Unchecked | 17 EXPIRED        | Expired  |
| NA             | Checked   | Unchecked | Unchecked | 10 Montifiore     | Transfer |
| NA             | Checked   | Checked   | Unchecked | 25 Expired        | Expired  |
| NA             | Checked   | Unchecked | Unchecked | 2 home            | Home     |
| NA             | Unchecked | Checked   | Checked   | 4 Skilled nsg fæ  | SNF      |
| NA             | Checked   | Unchecked | Unchecked | 0 Expired         | Expired  |
| NA             | Unchecked | Checked   | Unchecked | 16 Expired        | Expired  |
| NA             | Checked   | Unchecked | Unchecked | 1 home            | Home     |
| NA             | Checked   | Unchecked | Unchecked | 3 Home            | Home     |
| NA             | Unchecked | Unchecked | Checked   | 6 expired         | Expired  |
| NA             | Checked   | Unchecked | Unchecked | 1 home            | Home     |
| NA             | Unchecked | Unchecked | Unchecked | 11 home           | Home     |
| NA             | Checked   | Unchecked | Unchecked | 20 NA             | NA       |
| NA             | Checked   | Unchecked | Unchecked | 9 home            | Home     |
| NA             | Checked   | Checked   | Checked   | 13 home           | Home     |
| NA             | Unchecked | Unchecked | Unchecked | 7 Inpt Burke      | Rehab    |
| NA             | Checked   | Unchecked | Unchecked | 28 Northern We    | Rehab    |
| NA             | Unchecked | Unchecked | Unchecked | 61 Skilled Nursi  | SNF      |
| This is an inc | Checked   | Unchecked | Unchecked | 2 home            | Home     |
| NA             | Checked   | Unchecked | Unchecked | 3 home            | Home     |
| NA             | Checked   | Unchecked | Unchecked | 5 SNF             | SNF      |
| NA             | Checked   | Unchecked | Unchecked | 2 Westchester     | SNF      |
| NA             | Checked   | Unchecked | Checked   | 6 expired         | Expired  |
| NA             | Checked   | Unchecked | Unchecked | 8 Inpt rehab      | Rehab    |
| NA             | Checked   | Unchecked | Unchecked | 1 home            | Home     |
| NA             | Checked   | Unchecked | Unchecked | 9 home            | Home     |
| NA             | Unchecked | Unchecked | Checked   | 4 expired         | Expired  |
| NA             | Checked   | Unchecked | Unchecked | 14 skilled nursir | SNF      |
| NA             | Checked   | Unchecked | Unchecked | 6 Assisted livir  | AL       |
| NA             | Checked   | Unchecked | Unchecked | 2 home            | Home     |
| NA             | Checked   | Unchecked | Unchecked | 6 Skilled Nursi   | SNF      |
| NA             | Unchecked | Unchecked | Checked   | 9 home            | Home     |
| NA             | Unchecked | Unchecked | Unchecked | 2 expired         | Expired  |
| NA             | Unchecked | Checked   | Unchecked | 6 expired         | Expired  |
| NA             | Unchecked | Unchecked | Checked   | 1 home            | Home     |
| This is a reac | Checked   | Unchecked | Unchecked | 6 inpt rehab      | Rehab    |
| NA             | Checked   | Unchecked | Checked   | 16 INPT rehab     | Rehab    |
| NA             | Checked   | Unchecked | Unchecked | 3 Home            | Home     |
| NA             | Checked   | Unchecked | Unchecked | 3 home            | Home     |
| NA             | Checked   | Unchecked | Checked   | 4 expired         | Expired  |

|                |           |           |           |                   |         |
|----------------|-----------|-----------|-----------|-------------------|---------|
| NA             | Checked   | Unchecked | Unchecked | 1 home            | Home    |
| NA             | Checked   | Unchecked | Unchecked | 3 Left AMA        | AMA     |
| NA             | Unchecked | Unchecked | Checked   | 14 expired        | Expired |
| NA             | Checked   | Unchecked | Unchecked | 4 home            | Home    |
| NA             | Checked   | Unchecked | Unchecked | 7 skilled nursir  | SNF     |
| NA             | Checked   | Unchecked | Unchecked | 5 expired         | Expired |
| NA             | Checked   | Unchecked | Unchecked | 3 home            | Home    |
| NA             | Checked   | Unchecked | Unchecked | 18 home           | Home    |
| NA             | Checked   | Unchecked | Unchecked | 4 home            | Home    |
| NA             | Checked   | Unchecked | Unchecked | 7 group home      | Home    |
| NA             | Checked   | Unchecked | Unchecked | 3 NA              | NA      |
| NA             | Unchecked | Unchecked | Checked   | 17 hospice hom    | Hospice |
| NA             | Unchecked | Checked   | Checked   | 32 expired        | Expired |
| NA             | Checked   | Unchecked | Unchecked | 3 home            | Home    |
| NA             | Checked   | Unchecked | Unchecked | 4 Home            | Home    |
| NA             | Checked   | Unchecked | Unchecked | 6 skilled nursir  | SNF     |
| NA             | Checked   | Unchecked | Unchecked | 1 NA              | NA      |
| This is an inc | Unchecked | Unchecked | Unchecked | 9 expired         | Expired |
| NA             | Checked   | Unchecked | Unchecked | 5 home            | Home    |
| NA             | Checked   | Unchecked | Checked   | 20 expired        | Expired |
| NA             | Checked   | Unchecked | Unchecked | 1 NA              | NA      |
| NA             | Checked   | Unchecked | Unchecked | 5 home            | Home    |
| NA             | Checked   | Unchecked | Unchecked | 3 NA              | NA      |
| NA             | Checked   | Unchecked | Unchecked | 4 NA              | NA      |
| NA             | Unchecked | Unchecked | Unchecked | 1 NA              | NA      |
| NA             | Checked   | Unchecked | Unchecked | 16 NA             | NA      |
| NA             | Unchecked | Unchecked | Unchecked | 43 expired        | Expired |
| NA             | Checked   | Unchecked | Checked   | 6 group home      | Home    |
| NA             | Checked   | Unchecked | Unchecked | 4 NA              | NA      |
| NA             | Checked   | Unchecked | Unchecked | 11 expired        | Expired |
| This is an inc | Checked   | Unchecked | Unchecked | 14 home           | Home    |
| NA             | Checked   | Unchecked | Checked   | 13 skilled nursir | SNF     |
| NA             | Checked   | Unchecked | Unchecked | 6 expired         | Expired |
| NA             | Checked   | Unchecked | Unchecked | 7 NA              | NA      |
| This is an inc | Checked   | Unchecked | Checked   | 5 home            | Home    |
| NA             | Unchecked | Unchecked | Checked   | 25 NA             | NA      |
| NA             | Unchecked | Unchecked | Checked   | 12 home           | Home    |
| NA             | Checked   | Unchecked | Checked   | 14 expired        | Expired |
| NA             | Checked   | Unchecked | Unchecked | 19 NA             | NA      |
| NA             | Checked   | Checked   | Unchecked | 7 expired         | Expired |
| NA             | Checked   | Unchecked | Unchecked | 6 home            | Home    |
| NA             | Checked   | Unchecked | Unchecked | 7 expired         | Expired |
| This is an inc | Checked   | Unchecked | Unchecked | 8 hospice facili  | Hospice |
| NA             | Checked   | Unchecked | Unchecked | 1 home            | Home    |
| NA             | Unchecked | Unchecked | Unchecked | 9 home            | Home    |

|                |           |           |           |                   |         |
|----------------|-----------|-----------|-----------|-------------------|---------|
| NA             | Checked   | Unchecked | Unchecked | 4 home            | Home    |
| NA             | Checked   | Unchecked | Checked   | 11 Skilled nursir | SNF     |
| NA             | Unchecked | Unchecked | Unchecked | 1 home            | Home    |
| NA             | Checked   | Unchecked | Unchecked | 1 expired         | Expired |
| NA             | Checked   | Unchecked | Unchecked | 2 home            | Home    |
| NA             | Checked   | Unchecked | Unchecked | 5 hospice hom     | Hospice |
| NA             | Unchecked | Unchecked | Checked   | 3 NA              | NA      |
| NA             | Checked   | Unchecked | Unchecked | 4 NA              | NA      |
| NA             | Checked   | Checked   | Unchecked | 9 Expired         | Expired |
| NA             | Checked   | Unchecked | Checked   | 10 expired        | Expired |
| NA             | Checked   | Unchecked | Checked   | 2 NA              | NA      |
| This is an inc | Checked   | Unchecked | Unchecked | 12 home           | Home    |
| NA             | Checked   | Unchecked | Unchecked | 5 NA              | NA      |
| NA             | Checked   | Unchecked | Unchecked | 13 home           | Home    |
| NA             | Unchecked | Unchecked | Unchecked | 5 NA              | NA      |
| This is an inc | Unchecked | Unchecked | Checked   | 6 Home            | Home    |
| NA             | Checked   | Unchecked | Checked   | 18 Burke          | Rehab   |
| This is a reac | Checked   | Unchecked | Unchecked | 14 home           | Home    |
| This is an inc | Checked   | Unchecked | Unchecked | 9 Calvary hospi   | Hospice |
| This is an inc | Checked   | Unchecked | Unchecked | 3 home            | Home    |
| NA             | Checked   | Unchecked | Unchecked | 2 Home            | Home    |
| This is an inc | Checked   | Unchecked | Unchecked | 9 SNF             | SNF     |
| NA             | Checked   | Unchecked | Unchecked | 6 expired         | Expired |
| NA             | Checked   | Unchecked | Unchecked | 4 home            | Home    |
| NA             | Checked   | Unchecked | Unchecked | 7 expired         | Expired |
| This is an inc | Checked   | Unchecked | Unchecked | 2 home            | Home    |
| NA             | Checked   | Unchecked | Unchecked | 4 SNF             | SNF     |
| NA             | Checked   | Checked   | Unchecked | 11 Home           | Home    |
| NA             | Checked   | Checked   | Unchecked | 7 expired         | Expired |
| NA             | Checked   | Unchecked | Unchecked | 3 expired         | Expired |
| NA             | Checked   | Unchecked | Unchecked | 5 NA              | NA      |
| NA             | Checked   | Unchecked | Unchecked | 9 home            | Home    |
| NA             | Checked   | Unchecked | Unchecked | 3 home            | Home    |
| NA             | Unchecked | Unchecked | Unchecked | 2 home            | Home    |
| NA             | Checked   | Unchecked | Unchecked | 13 SNF            | SNF     |
| NA             | Checked   | Unchecked | Unchecked | 2 home            | Home    |
| NA             | Checked   | Checked   | Unchecked | 28 expired        | Expired |
| NA             | Checked   | Unchecked | Unchecked | 3 expired         | Expired |
| NA             | Checked   | Unchecked | Unchecked | 21 expired        | Expired |
| This is an inc | Checked   | Unchecked | Unchecked | 7 home            | Home    |
| NA             | Checked   | Unchecked | Unchecked | 5 home            | Home    |
| NA             | Checked   | Unchecked | Unchecked | 3 home            | Home    |
| NA             | Checked   | Unchecked | Unchecked | 13 home           | Home    |
| NA             | Checked   | Checked   | Unchecked | 16 expired        | Expired |
| NA             | Checked   | Unchecked | Unchecked | 5 home            | Home    |

|                |           |           |           |                  |         |
|----------------|-----------|-----------|-----------|------------------|---------|
| NA             | Checked   | Unchecked | Unchecked | 12 expired       | Expired |
| NA             | Checked   | Unchecked | Unchecked | 2 expired        | Expired |
| NA             | Checked   | Unchecked | Unchecked | 6 SNF            | SNF     |
| NA             | Checked   | Unchecked | Unchecked | 3 expired        | Expired |
| NA             | Unchecked | Unchecked | Checked   | 4 expired        | Expired |
| NA             | Checked   | Unchecked | Unchecked | 1 Home           | Home    |
| NA             | Checked   | Unchecked | Checked   | 7 home           | Home    |
| NA             | Unchecked | Unchecked | Checked   | 5 expired        | Expired |
| NA             | Checked   | Unchecked | Checked   | 5 home           | Home    |
| NA             | Unchecked | Unchecked | Checked   | 4 expired        | Expired |
| NA             | Checked   | Unchecked | Checked   | 8 home           | Home    |
| NA             | Checked   | Unchecked | Unchecked | 3 home           | Home    |
| NA             | Checked   | Unchecked | Unchecked | 5 home           | Home    |
| NA             | Checked   | Unchecked | Unchecked | 3 home           | Home    |
| NA             | Checked   | Unchecked | Unchecked | 5 physical reha  | Rehab   |
| NA             | Checked   | Unchecked | Unchecked | 2 home           | Home    |
| NA             | Checked   | Unchecked | Unchecked | 2 home           | Home    |
| NA             | Checked   | Checked   | Checked   | 8 expired        | Expired |
| NA             | Checked   | Unchecked | Checked   | 18 expired       | Expired |
| NA             | Checked   | Unchecked | Unchecked | 16 Hospice facil | Hospice |
| NA             | Checked   | Unchecked | Unchecked | 5 home           | Home    |
| NA             | Checked   | Unchecked | Checked   | 15 home          | Home    |
| NA             | Checked   | Unchecked | Unchecked | 11 home          | Home    |
| NA             | Checked   | Unchecked | Unchecked | 4 home           | Home    |
| NA             | Checked   | Unchecked | Unchecked | 1 home           | Home    |
| NA             | Unchecked | Unchecked | Checked   | 8 home           | Home    |
| NA             | Unchecked | Checked   | Checked   | 27 Physical Reha | Rehab   |
| NA             | Unchecked | Unchecked | Checked   | 11 expired       | Expired |
| NA             | Checked   | Unchecked | Unchecked | 1 home           | Home    |
| NA             | Checked   | Unchecked | Unchecked | 4 home           | Home    |
| NA             | Checked   | Unchecked | Unchecked | 8 home           | Home    |
| NA             | Checked   | Unchecked | Unchecked | 8 physical reha  | Rehab   |
| NA             | Checked   | Unchecked | Unchecked | 5 home           | Home    |
| NA             | Checked   | Unchecked | Checked   | 26 home          | Home    |
| NA             | Checked   | Checked   | Checked   | 44 home          | Home    |
| NA             | Checked   | Unchecked | Unchecked | 6 SNF            | SNF     |
| This is an inc | Checked   | Unchecked | Checked   | 5 home           | Home    |
| This is a reac | Checked   | Unchecked | Unchecked | 10 home          | Home    |
| NA             | Checked   | Unchecked | Unchecked | 7 home           | Home    |
| NA             | Checked   | Checked   | Checked   | 15 expired       | Expired |
| NA             | Checked   | Unchecked | Unchecked | 3 home           | Home    |
| NA             | Checked   | Unchecked | Unchecked | 3 SNF            | SNF     |
| NA             | Checked   | Unchecked | Unchecked | 1 home           | Home    |
| This is an inc | Checked   | Unchecked | Checked   | 21 home          | Home    |
| NA             | Checked   | Unchecked | Unchecked | 6 expired        | Expired |

|                |           |           |           |               |         |
|----------------|-----------|-----------|-----------|---------------|---------|
| NA             | Unchecked | Checked   | Unchecked | 3 expired     | Expired |
| NA             | Checked   | Unchecked | Unchecked | 5 home        | Home    |
| NA             | Checked   | Unchecked | Unchecked | 2 home        | Home    |
| NA             | Checked   | Unchecked | Unchecked | 2 home        | Home    |
| NA             | Unchecked | Checked   | Checked   | 14 expired    | Expired |
| NA             | Checked   | Unchecked | Unchecked | 1 home        | Home    |
| NA             | Checked   | Unchecked | Checked   | 9 home        | Home    |
| NA             | Checked   | Unchecked | Unchecked | 8 home        | Home    |
| NA             | Unchecked | Unchecked | Checked   | 3 home        | Home    |
| NA             | Checked   | Unchecked | Unchecked | 6 Home        | Home    |
| NA             | Checked   | Unchecked | Unchecked | 8 SNF         | SNF     |
| NA             | Checked   | Unchecked | Unchecked | 3 Expired     | Expired |
| NA             | Checked   | Unchecked | Unchecked | 0 NA          | NA      |
| NA             | Checked   | Unchecked | Checked   | 8 SNF         | SNF     |
| NA             | Checked   | Unchecked | Unchecked | 5 Home        | Home    |
| NA             | Checked   | Checked   | Checked   | 15 rehab      | Rehab   |
| This is a reat | Unchecked | Unchecked | Checked   | 4 rehab       | Rehab   |
| This is an inc | Unchecked | Checked   | Unchecked | 17 expired    | Expired |
| This is an inc | Checked   | Unchecked | Unchecked | 21 home       | Home    |
| NA             | Checked   | Unchecked | Unchecked | 2 home        | Home    |
| NA             | Unchecked | Unchecked | Unchecked | 4 expired     | Expired |
| NA             | Checked   | Unchecked | Checked   | 39 Phys Rehab | Rehab   |
| NA             | Checked   | Unchecked | Unchecked | 3 home        | Home    |
| NA             | Checked   | Unchecked | Checked   | 15 expired    | Expired |
| NA             | Checked   | Unchecked | Unchecked | 4 home        | Home    |
| NA             | Checked   | Unchecked | Unchecked | 7 home        | Home    |
| NA             | Checked   | Unchecked | Unchecked | 9 home        | Home    |
| NA             | Unchecked | Unchecked | Checked   | 2 home        | Home    |
| NA             | Unchecked | Checked   | Checked   | 4 Expired     | Expired |
| NA             | Checked   | Unchecked | Unchecked | 1 Home        | Home    |
| This is an inc | Checked   | Unchecked | Unchecked | 3 Home        | Home    |
| This is an inc | Checked   | Unchecked | Unchecked | 4 Expired     | Expired |
| NA             | Checked   | Unchecked | Unchecked | 1 home        | Home    |
| NA             | Checked   | Unchecked | Unchecked | 7 home        | Home    |
| NA             | Checked   | Unchecked | Unchecked | 3 Inpt rehab  | Rehab   |
| NA             | Checked   | Unchecked | Unchecked | 1 home        | Home    |
| NA             | Unchecked | Checked   | Unchecked | 21 Expired    | Expired |
| NA             | Unchecked | Checked   | Unchecked | 9 Expired     | Expired |
| NA             | Checked   | Unchecked | Unchecked | 4 SNF         | SNF     |
| NA             | Checked   | Unchecked | Unchecked | 1 SNF         | SNF     |
| NA             | Checked   | Unchecked | Unchecked | 10 Home       | Home    |
| NA             | Checked   | Unchecked | Unchecked | 8 Expired     | Expired |
| NA             | Checked   | Checked   | Unchecked | 44 Expired    | Expired |
| NA             | Checked   | Unchecked | Unchecked | 9 Home        | Home    |
| NA             | Checked   | Unchecked | Unchecked | 8 Home        | Home    |

|                |           |           |           |    |               |         |
|----------------|-----------|-----------|-----------|----|---------------|---------|
| NA             | Checked   | Unchecked | Unchecked | 10 | Home          | Home    |
| NA             | Checked   | Unchecked | Unchecked | 5  | SNF           | SNF     |
| NA             | Checked   | Unchecked | Unchecked | 4  | SNF           | SNF     |
| NA             | Checked   | Unchecked | Unchecked | 4  | Home          | Home    |
| NA             | Checked   | Unchecked | Unchecked | 6  | SNF           | SNF     |
| NA             | Unchecked | Unchecked | Checked   | 1  | Home          | Home    |
| NA             | Checked   | Unchecked | Unchecked | 5  | Home          | Home    |
| NA             | Unchecked | Unchecked | Checked   | 16 | SNF           | SNF     |
| NA             | Unchecked | Unchecked | Unchecked | 2  | NA            | NA      |
| NA             | Checked   | Unchecked | Unchecked | 1  | home          | Home    |
| NA             | Checked   | Unchecked | Unchecked | 36 | SNF           | SNF     |
| NA             | Checked   | Unchecked | Unchecked | 19 | Home          | Home    |
| NA             | Unchecked | Checked   | Unchecked | 3  | Expired       | Expired |
| NA             | Unchecked | Unchecked | Checked   | 1  | Home          | Home    |
| NA             | Unchecked | Checked   | Unchecked | 7  | Ex[pired      | Expired |
| NA             | Checked   | Unchecked | Unchecked | 4  | SNF           | SNF     |
| NA             | Unchecked | Unchecked | Checked   | 18 | SNF           | SNF     |
| NA             | Unchecked | Unchecked | Unchecked | 12 | Expired       | Expired |
| This is an inc | Checked   | Unchecked | Checked   | 18 | Home          | Home    |
| NA             | Checked   | Unchecked | Unchecked | 4  | Expired       | Expired |
| NA             | Unchecked | Checked   | Unchecked | 11 | expired       | Expired |
| NA             | Unchecked | Unchecked | Checked   | 2  | Home          | Home    |
| NA             | Unchecked | Unchecked | Checked   | 8  | Home          | Home    |
| NA             | Checked   | Unchecked | Unchecked | 8  | Hlme          | Home    |
| NA             | Checked   | Unchecked | Unchecked | 2  | Home          | Home    |
| NA             | Checked   | Unchecked | Unchecked | 3  | Home          | Home    |
| NA             | Checked   | Unchecked | Unchecked | 6  | snf           | SNF     |
| This is a reac | Checked   | Unchecked | Unchecked | 11 | Expired       | Expired |
| NA             | Checked   | Unchecked | Unchecked | 5  | Home          | Home    |
| NA             | Checked   | Unchecked | Unchecked | 7  | Expired       | Expired |
| NA             | Checked   | Unchecked | Unchecked | 3  | Expired       | Expired |
| NA             | Checked   | Unchecked | Unchecked | 11 | Expired       | Expired |
| NA             | Checked   | Checked   | Checked   | 35 | expired       | Expired |
| NA             | Unchecked | Unchecked | Unchecked | 2  | NA            | NA      |
| NA             | Unchecked | Unchecked | Unchecked | 2  | Home          | Home    |
| NA             | Unchecked | Unchecked | Checked   | 12 | Expired       | Expired |
| NA             | Checked   | Unchecked | Unchecked | 5  | NA            | NA      |
| NA             | Checked   | Unchecked | Unchecked | 4  | Home          | Home    |
| NA             | Checked   | Unchecked | Unchecked | 8  | SNF           | SNF     |
| NA             | Checked   | Unchecked | Unchecked | 2  | Home          | Home    |
| NA             | Unchecked | Unchecked | Checked   | 17 | Hospice       | Hospice |
| NA             | Unchecked | Checked   | Checked   | 1  | NA            | NA      |
| NA             | Checked   | Unchecked | Unchecked | 18 | trans to Psyc | PSYCH   |
| NA             | Checked   | Unchecked | Unchecked | 3  | Home          | Home    |
| NA             | Checked   | Unchecked | Unchecked | 4  | Rehab         | Rehab   |

|                |           |           |           |    |                |         |
|----------------|-----------|-----------|-----------|----|----------------|---------|
| NA             | Checked   | Unchecked | Unchecked | 6  | Home           | Home    |
| NA             | Unchecked | Unchecked | Unchecked | 4  | Expired        | Expired |
| NA             | Unchecked | Unchecked | Unchecked | 15 | Expired        | Expired |
| NA             | Unchecked | Unchecked | Checked   | 23 | SNF            | SNF     |
| NA             | Unchecked | Unchecked | Checked   | 3  | Rehab          | Rehab   |
| NA             | Checked   | Unchecked | Unchecked | 2  | Home           | Home    |
| This is a reac | Unchecked | Unchecked | Checked   | 8  | Home           | Home    |
| This is a reac | Checked   | Unchecked | Unchecked | 5  | home           | Home    |
| NA             | Checked   | Unchecked | Unchecked | 10 | SNF            | SNF     |
| NA             | Checked   | Unchecked | Unchecked | 3  | Home with s    | Home    |
| NA             | Unchecked | Unchecked | Unchecked | 4  | SNF            | SNF     |
| NA             | Unchecked | Unchecked | Checked   | 1  | Home           | Home    |
| This is a reac | Unchecked | Checked   | Checked   | 22 | Expired        | Expired |
| NA             | Checked   | Unchecked | Unchecked | 2  | Home           | Home    |
| NA             | Checked   | Unchecked | Unchecked | 9  | Expired        | Expired |
| NA             | Checked   | Unchecked | Unchecked | 4  | Home           | Home    |
| NA             | Unchecked | Unchecked | Checked   | 3  | Home           | Home    |
| NA             | Unchecked | Unchecked | Checked   | 1  | Home           | Home    |
| NA             | Checked   | Unchecked | Unchecked | 5  | Home           | Home    |
| NA             | Checked   | Unchecked | Unchecked | 6  | snf            | SNF     |
| NA             | Unchecked | Unchecked | Unchecked | 4  | Assisted livir | AL      |
| NA             | Checked   | Unchecked | Unchecked | 5  | Rehab          | Rehab   |
| NA             | Checked   | Unchecked | Unchecked | 8  | Home           | Home    |
| NA             | Checked   | Unchecked | Unchecked | 3  | Home           | Home    |
| NA             | Unchecked | Unchecked | Unchecked | 0  | NA             | NA      |
| This is a reac | Checked   | Unchecked | Unchecked | 7  | Home           | Home    |
| NA             | Checked   | Unchecked | Unchecked | 5  | Expired        | Expired |
| NA             | Checked   | Unchecked | Unchecked | 19 | NA             | NA      |
| NA             | Checked   | Unchecked | Unchecked | 15 | Home           | Home    |
| NA             | Unchecked | Unchecked | Checked   | 6  | NA             | NA      |
| NA             | Unchecked | Unchecked | Unchecked | 11 | SNF            | SNF     |
| This is a reac | Checked   | Unchecked | Unchecked | 14 | SNF            | SNF     |
| This is a reac | Checked   | Unchecked | Unchecked | 4  | Home           | Home    |
| NA             | Checked   | Unchecked | Unchecked | 8  | Home           | Home    |
| NA             | Checked   | Unchecked | Unchecked | 8  | SNF            | SNF     |
| NA             | Checked   | Unchecked | Unchecked | 13 | Rehab          | Rehab   |
| NA             | Checked   | Unchecked | Unchecked | 3  | SNF            | SNF     |
| NA             | Checked   | Unchecked | Unchecked | 1  | Home           | Home    |
| NA             | Checked   | Unchecked | Unchecked | 7  | Expired        | Expired |
| NA             | Unchecked | Unchecked | Checked   | 2  | Expired        | Expired |
| NA             | Checked   | Unchecked | Unchecked | 4  | SNF            | SNF     |
| NA             | Checked   | Unchecked | Unchecked | 7  | Rehab          | Rehab   |
| NA             | Unchecked | Unchecked | Checked   | 4  | SNF            | SNF     |
| NA             | Unchecked | Unchecked | Unchecked | 2  | Home           | Home    |
| NA             | Unchecked | Unchecked | Checked   | 8  | Home           | Home    |



|                |           |           |           |    |               |          |
|----------------|-----------|-----------|-----------|----|---------------|----------|
| NA             | Unchecked | Unchecked | Checked   | 10 | Expired       | Expired  |
| NA             | Checked   | Unchecked | Checked   | 13 | Rehab         | Rehab    |
| NA             | Unchecked | Unchecked | Checked   | 5  | Home          | Home     |
| NA             | Checked   | Unchecked | Unchecked | 8  | SNF           | SNF      |
| This is a reac | Checked   | Unchecked | Unchecked | 3  | Hospice       | Hospice  |
| NA             | Checked   | Unchecked | Unchecked | 2  | NA            | NA       |
| NA             | Unchecked | Unchecked | Checked   | 12 | Expired       | Expired  |
| NA             | Unchecked | Unchecked | Checked   | 9  | Home          | Home     |
| NA             | Checked   | Unchecked | Unchecked | 13 | SNF           | SNF      |
| NA             | Checked   | Unchecked | Unchecked | 1  | Home          | Home     |
| NA             | Checked   | Unchecked | Unchecked | 8  | Home          | Home     |
| NA             | Checked   | Unchecked | Unchecked | 5  | Home          | Home     |
| NA             | Checked   | Unchecked | Unchecked | 5  | SNF           | SNF      |
| NA             | Checked   | Unchecked | Unchecked | 7  | Hospice/ ass  | Hospice  |
| NA             | Unchecked | Unchecked | Checked   | 3  | NA            | NA       |
| This is a reac | Checked   | Unchecked | Unchecked | 9  | Group Home    | Home     |
| NA             | Checked   | Unchecked | Unchecked | 5  | Expired       | Expired  |
| NA             | Checked   | Unchecked | Unchecked | 5  | Home          | Home     |
| NA             | Unchecked | Unchecked | Unchecked | 3  | Home          | Home     |
| NA             | Unchecked | Unchecked | Checked   | 4  | Home          | Home     |
| NA             | Unchecked | Unchecked | Checked   | 22 | home          | Home     |
| NA             | Checked   | Unchecked | Unchecked | 4  | Expired       | Expired  |
| NA             | Checked   | Unchecked | Unchecked | 4  | Home          | Home     |
| NA             | Checked   | Unchecked | Unchecked | 2  | Home          | Home     |
| NA             | Checked   | Unchecked | Unchecked | 7  | SNF           | SNF      |
| NA             | Unchecked | Unchecked | Checked   | 8  | SNF           | SNF      |
| This is an inc | Checked   | Unchecked | Unchecked | 10 | SNF           | SNF      |
| NA             | Unchecked | Unchecked | Unchecked | 14 | NA            | NA       |
| This is an inc | Unchecked | Checked   | Unchecked | 3  | Expired       | Expired  |
| NA             | Checked   | Unchecked | Unchecked | 8  | Home          | Home     |
| NA             | Checked   | Unchecked | Unchecked | 5  | Home          | Home     |
| NA             | Checked   | Unchecked | Unchecked | 7  | Home          | Home     |
| This is an inc | Checked   | Unchecked | Unchecked | 1  | transferred t | Transfer |
| NA             | Checked   | Unchecked | Unchecked | 6  | Home          | Home     |
| NA             | Checked   | Unchecked | Unchecked | 9  | SNF           | SNF      |
| This is an inc | Checked   | Unchecked | Unchecked | 2  | Home          | Home     |
| NA             | Unchecked | Unchecked | Checked   | 10 | SNF           | SNF      |
| NA             | Checked   | Unchecked | Unchecked | 2  | Expired       | Expired  |
| NA             | Checked   | Unchecked | Unchecked | 9  | SNF           | SNF      |
| This is a reac | Checked   | Unchecked | Unchecked | 2  | SNF           | SNF      |
| NA             | Checked   | Unchecked | Unchecked | 4  | Home          | Home     |
| NA             | Checked   | Unchecked | Unchecked | 6  | Home          | Home     |
| This is an inc | Checked   | Unchecked | Unchecked | 4  | Home          | Home     |
| NA             | Checked   | Unchecked | Unchecked | 7  | SNF           | SNF      |
| NA             | Unchecked | Unchecked | Unchecked | 38 | SNF           | SNF      |

|                |           |           |           |    |            |         |
|----------------|-----------|-----------|-----------|----|------------|---------|
| NA             | Checked   | Unchecked | Unchecked | 3  | Home       | Home    |
| NA             | Checked   | Unchecked | Unchecked | 4  | Home       | Home    |
| NA             | Checked   | Unchecked | Unchecked | 5  | SNF        | SNF     |
| NA             | Checked   | Unchecked | Unchecked | 7  | Home       | Home    |
| NA             | Checked   | Unchecked | Unchecked | 6  | Home       | Home    |
| NA             | Checked   | Unchecked | Unchecked | 10 | Home       | Home    |
| NA             | Checked   | Unchecked | Unchecked | 18 | Hospice    | Hospice |
| NA             | Checked   | Unchecked | Unchecked | 3  | SNF        | SNF     |
| NA             | Checked   | Unchecked | Unchecked | 13 | SNF        | SNF     |
| NA             | Checked   | Unchecked | Unchecked | 16 | Expired    | Expired |
| NA             | Checked   | Unchecked | Unchecked | 7  | Home       | Home    |
| NA             | Checked   | Unchecked | Unchecked | 7  | Group Home | Home    |
| NA             | Checked   | Unchecked | Unchecked | 8  | SNF        | SNF     |
| NA             | Checked   | Unchecked | Unchecked | 15 | Hospice    | Hospice |
| NA             | Checked   | Unchecked | Unchecked | 7  | SNF        | SNF     |
| NA             | Checked   | Unchecked | Unchecked | 5  | Home       | Home    |
| NA             | Checked   | Unchecked | Unchecked | 4  | SNF        | SNF     |
| NA             | Checked   | Unchecked | Unchecked | 11 | Rehab      | Rehab   |
| This is an inc | Checked   | Unchecked | Unchecked | 3  | Expired    | Expired |
| NA             | Checked   | Unchecked | Unchecked | 2  | Home       | Home    |
| NA             | Unchecked | Checked   | Checked   | 12 | Expired    | Expired |
| NA             | Checked   | Unchecked | Unchecked | 4  | Home       | Home    |
| NA             | Checked   | Unchecked | Unchecked | 1  | Home       | Home    |
| NA             | Checked   | Unchecked | Checked   | 22 | Home       | Home    |
| NA             | Checked   | Unchecked | Unchecked | 8  | Home       | Home    |
| NA             | Checked   | Unchecked | Unchecked | 4  | Home       | Home    |
| NA             | Checked   | Unchecked | Unchecked | 5  | SNF        | SNF     |
| NA             | Checked   | Unchecked | Unchecked | 9  | Expired    | Expired |
| This is a reac | Checked   | Unchecked | Unchecked | 14 | SNF        | SNF     |
| This is an inc | Unchecked | Unchecked | Checked   | 1  | Home       | Home    |
| NA             | Checked   | Unchecked | Unchecked | 5  | SNF        | SNF     |
| NA             | Checked   | Unchecked | Unchecked | 2  | Home       | Home    |
| NA             | Checked   | Unchecked | Unchecked | 4  | Home       | Home    |
| NA             | Checked   | Checked   | Checked   | 11 | Expired    | Expired |
| NA             | Unchecked | Unchecked | Checked   | 7  | Expired    | Expired |
| NA             | Checked   | Unchecked | Unchecked | 23 | Rehab      | Rehab   |
| This is an inc | Checked   | Unchecked | Unchecked | 11 | expired    | Expired |
| NA             | Unchecked | Unchecked | Checked   | 5  | Expired    | Expired |
| NA             | Checked   | Unchecked | Unchecked | 9  | Home       | Home    |
| NA             | Checked   | Unchecked | Checked   | 34 | Rehab      | Rehab   |
| NA             | Checked   | Checked   | Unchecked | 10 | Expired    | Expired |
| This is an inc | Unchecked | Unchecked | Checked   | 20 | Hospice    | Hospice |
| NA             | Checked   | Unchecked | Unchecked | 9  | Expired    | Expired |
| NA             | Checked   | Unchecked | Unchecked | 6  | SNF        | SNF     |
| NA             | Checked   | Unchecked | Unchecked | 1  | Expired    | Expired |

|                |           |           |           |    |                |         |
|----------------|-----------|-----------|-----------|----|----------------|---------|
| This is an inc | Unchecked | Unchecked | Checked   | 6  | Expired        | Expired |
| NA             | Unchecked | Unchecked | Checked   | 4  | Home           | Home    |
| NA             | Checked   | Unchecked | Unchecked | 3  | Home           | Home    |
| This is an inc | Unchecked | Unchecked | Checked   | 1  | Home           | Home    |
| NA             | Unchecked | Unchecked | Checked   | 16 | Expired        | Expired |
| NA             | Checked   | Unchecked | Unchecked | 4  | Expired        | Expired |
| NA             | Unchecked | Unchecked | Unchecked | 18 | Home           | Home    |
| NA             | Checked   | Unchecked | Unchecked | 5  | SNF            | SNF     |
| NA             | Checked   | Unchecked | Unchecked | 11 | Home           | Home    |
| NA             | Checked   | Unchecked | Unchecked | 9  | Expired        | Expired |
| This is an inc | Checked   | Unchecked | Unchecked | 1  | Home           | Home    |
| NA             | Checked   | Unchecked | Unchecked | 4  | Home           | Home    |
| NA             | Checked   | Unchecked | Unchecked | 6  | Home           | Home    |
| This is a reac | Checked   | Unchecked | Unchecked | 15 | Group Home     | Home    |
| NA             | Unchecked | Unchecked | Unchecked | 7  | SNF            | SNF     |
| NA             | Checked   | Unchecked | Unchecked | 7  | Expired        | Expired |
| NA             | Unchecked | Checked   | Unchecked | 11 | Expired        | Expired |
| This is an inc | Checked   | Unchecked | Unchecked | 5  | Home           | Home    |
| NA             | Checked   | Checked   | Unchecked | 30 | Rehab          | Rehab   |
| NA             | Checked   | Unchecked | Checked   | 24 | Rehab          | Rehab   |
| NA             | Checked   | Unchecked | Unchecked | 9  | Home           | Home    |
| NA             | Unchecked | Checked   | Unchecked | 10 | Expired        | Expired |
| NA             | Unchecked | Unchecked | Checked   | 1  | Home           | Home    |
| NA             | Unchecked | Unchecked | Checked   | 16 | Hospice        | Hospice |
| NA             | Unchecked | Checked   | Checked   | 16 | Expired        | Expired |
| NA             | Checked   | Unchecked | Unchecked | 9  | Home           | Home    |
| NA             | Checked   | Unchecked | Unchecked | 13 | SNF            | SNF     |
| NA             | Checked   | Unchecked | Unchecked | 17 | SNF            | SNF     |
| NA             | Checked   | Unchecked | Unchecked | 9  | Expired        | Expired |
| This is an inc | Checked   | Unchecked | Unchecked | 9  | SNF            | SNF     |
| This is a reac | Checked   | Unchecked | Unchecked | 2  | SNF            | SNF     |
| NA             | Checked   | Unchecked | Unchecked | 5  | Home           | Home    |
| NA             | Checked   | Unchecked | Checked   | 20 | Hospice-Horr   | Hospice |
| NA             | Checked   | Unchecked | Unchecked | 14 | Expired        | Expired |
| NA             | Checked   | Unchecked | Unchecked | 3  | SNF            | SNF     |
| NA             | Checked   | Unchecked | Unchecked | 2  | Home           | Home    |
| This is a reac | Checked   | Unchecked | Checked   | 3  | Home           | Home    |
| NA             | Checked   | Unchecked | Unchecked | 4  | Assited Living | AL      |
| NA             | Unchecked | Unchecked | Checked   | 9  | Rehab          | Rehab   |
| NA             | Checked   | Unchecked | Checked   | 17 | Rehab          | Rehab   |
| This is an inc | Checked   | Checked   | Checked   | 7  | Home           | Home    |
| NA             | Checked   | Unchecked | Unchecked | 5  | Home           | Home    |
| NA             | Checked   | Unchecked | Unchecked | 3  | Home           | Home    |
| This is a reac | Unchecked | Unchecked | Checked   | 6  | Expired        | Expired |
| NA             | Checked   | Unchecked | Unchecked | 6  | Home           | Home    |

|                |           |           |           |    |              |          |
|----------------|-----------|-----------|-----------|----|--------------|----------|
| NA             | Checked   | Unchecked | Unchecked | 4  | SNF          | SNF      |
| This is an inc | Checked   | Unchecked | Unchecked | 1  | Home         | Home     |
| This is a reac | Checked   | Unchecked | Unchecked | 15 | Rehab        | Rehab    |
| NA             | Unchecked | Unchecked | Checked   | 9  | Hospice Med  | Hospice  |
| NA             | Unchecked | Unchecked | Checked   | 7  | Home         | Home     |
| NA             | Checked   | Unchecked | Checked   | 6  | Expired      | Expired  |
| NA             | Unchecked | Checked   | Checked   | 19 | Expired      | Expired  |
| NA             | Checked   | Unchecked | Unchecked | 1  | Expired      | Expired  |
| NA             | Checked   | Unchecked | Unchecked | 7  | Home Health  | Home     |
| NA             | Checked   | Unchecked | Checked   | 10 | Home         | Home     |
| NA             | Checked   | Checked   | Unchecked | 6  | Expired      | Expired  |
| NA             | Checked   | Unchecked | Unchecked | 2  | Home         | Home     |
| NA             | Checked   | Unchecked | Unchecked | 5  | Home         | Home     |
| NA             | Unchecked | Checked   | Checked   | 17 | Home         | Home     |
| This is an inc | Checked   | Unchecked | Unchecked | 2  | SNF          | SNF      |
| NA             | Checked   | Unchecked | Checked   | 6  | Expired      | Expired  |
| NA             | Checked   | Unchecked | Unchecked | 6  | SNF          | SNF      |
| NA             | Checked   | Unchecked | Checked   | 34 | Home Health  | Home     |
| This is an inc | Unchecked | Unchecked | Checked   | 2  | Home         | Home     |
| NA             | Checked   | Unchecked | Unchecked | 3  | Home         | Home     |
| This is an inc | Checked   | Unchecked | Unchecked | 2  | Home         | Home     |
| NA             | Unchecked | Checked   | Unchecked | 5  | Expired      | Expired  |
| NA             | Checked   | Unchecked | Unchecked | 1  | Home         | Home     |
| NA             | Checked   | Unchecked | Checked   | 4  | Home         | Home     |
| This is an inc | Unchecked | Checked   | Checked   | 27 | SNF          | SNF      |
| NA             | Checked   | Unchecked | Unchecked | 1  | Home         | Home     |
| NA             | Unchecked | Checked   | Checked   | 11 | Expired      | Expired  |
| NA             | Checked   | Unchecked | Unchecked | 9  | Acute Care H | Transfer |
| NA             | Checked   | Unchecked | Unchecked | 12 | SNF          | SNF      |
| NA             | Checked   | Unchecked | Checked   | 13 | Home         | Home     |
| NA             | Checked   | Unchecked | Unchecked | 4  | Home         | Home     |
| NA             | Checked   | Unchecked | Checked   | 3  | Home Health  | Home     |
| NA             | Checked   | Unchecked | Unchecked | 5  | Home Health  | Home     |
| NA             | Checked   | Unchecked | Unchecked | 3  | Home Health  | Home     |
| NA             | Checked   | Checked   | Unchecked | 24 | Expired      | Expired  |
| NA             | Checked   | Unchecked | Checked   | 14 | Long Term C  | NA       |
| NA             | Checked   | Unchecked | Unchecked | 3  | Home         | Home     |
| NA             | Checked   | Unchecked | Unchecked | 9  | Home         | Home     |
| NA             | Checked   | Unchecked | Unchecked | 3  | Home Health  | Home     |
| NA             | Checked   | Unchecked | Checked   | 15 | Home         | Home     |
| NA             | Unchecked | Unchecked | Checked   | 0  | Home         | Home     |
| NA             | Unchecked | Checked   | Checked   | 22 | Expired      | Expired  |
| NA             | Checked   | Unchecked | Unchecked | 6  | Home         | Home     |
| NA             | Checked   | Unchecked | Unchecked | 3  | Home         | Home     |
| NA             | Checked   | Unchecked | Unchecked | 2  | Home         | Home     |

|                |           |           |           |    |              |         |
|----------------|-----------|-----------|-----------|----|--------------|---------|
| NA             | Unchecked | Checked   | Checked   | 15 | SNF          | SNF     |
| NA             | Unchecked | Unchecked | Checked   | 8  | Expired      | Expired |
| NA             | Checked   | Unchecked | Unchecked | 16 | Hospice Med  | Hospice |
| NA             | Checked   | Unchecked | Unchecked | 12 | Home         | Home    |
| NA             | Checked   | Unchecked | Unchecked | 5  | Home Healthr | Home    |
| NA             | Checked   | Unchecked | Unchecked | 4  | Expired      | Expired |
| NA             | Checked   | Unchecked | Unchecked | 5  | Home Healthr | Home    |
| NA             | Checked   | Unchecked | Unchecked | 8  | Home Healthr | Home    |
| NA             | Checked   | Unchecked | Checked   | 3  | Home         | Home    |
| This is an inc | Unchecked | Unchecked | Checked   | 1  | SNF          | SNF     |
| NA             | Checked   | Unchecked | Unchecked | 9  | Rehab        | Rehab   |
| NA             | Checked   | Unchecked | Unchecked | 2  | Home         | Home    |
| NA             | Unchecked | Checked   | Unchecked | 4  | Expired      | Expired |
| This is an inc | Checked   | Unchecked | Unchecked | 3  | Home         | Home    |
| NA             | Unchecked | Unchecked | Checked   | 2  | Home         | Home    |
| NA             | Checked   | Checked   | Checked   | 42 | Rehab        | Rehab   |
| NA             | Unchecked | Unchecked | Checked   | 9  | Expired      | Expired |
| NA             | Unchecked | Checked   | Checked   | 7  | Home         | Home    |
| NA             | Checked   | Checked   | Unchecked | 11 | Home         | Home    |
| NA             | Checked   | Unchecked | Checked   | 42 | Home Healthr | Home    |
| NA             | Checked   | Unchecked | Unchecked | 1  | Home Healthr | Home    |
| NA             | Unchecked | Unchecked | Checked   | 3  | Home         | Home    |
| NA             | Checked   | Unchecked | Unchecked | 8  | Home         | Home    |
| NA             | Checked   | Unchecked | Unchecked | 2  | Home         | Home    |
| NA             | Unchecked | Unchecked | Checked   | 10 | Home         | Home    |
| NA             | Checked   | Checked   | Checked   | 19 | Expired      | Expired |
| NA             | Checked   | Unchecked | Unchecked | 8  | Rehab        | Rehab   |
| NA             | Checked   | Unchecked | Unchecked | 13 | Rehab        | Rehab   |
| NA             | Checked   | Unchecked | Unchecked | 4  | Home Healthr | Home    |
| NA             | Checked   | Unchecked | Unchecked | 5  | Home Healthr | Home    |
| NA             | Unchecked | Checked   | Checked   | 14 | Expired      | Expired |
| NA             | Checked   | Unchecked | Unchecked | 7  | SNF          | SNF     |
| NA             | Checked   | Unchecked | Unchecked | 1  | Home         | Home    |
| NA             | Checked   | Unchecked | Unchecked | 3  | Home         | Home    |
| NA             | Checked   | Checked   | Checked   | 37 | SNF          | SNF     |
| NA             | Checked   | Checked   | Unchecked | 3  | Home         | Home    |
| This is an inc | Checked   | Unchecked | Unchecked | 4  | Home         | Home    |
| NA             | Unchecked | Checked   | Checked   | 7  | Expired      | Expired |
| NA             | Checked   | Unchecked | Checked   | 10 | Rehab        | Rehab   |
| NA             | Checked   | Unchecked | Unchecked | 2  | SNF          | SNF     |
| NA             | Checked   | Unchecked | Checked   | 17 | Home         | Home    |
| NA             | Checked   | Unchecked | Unchecked | 3  | Home         | Home    |
| NA             | Checked   | Unchecked | Checked   | 5  | Expired      | Expired |
| NA             | Unchecked | Unchecked | Unchecked | 2  | Home         | Home    |
| NA             | Checked   | Unchecked | Unchecked | 8  | SNF          | SNF     |

|                |           |           |           |    |                |         |
|----------------|-----------|-----------|-----------|----|----------------|---------|
| NA             | Unchecked | Checked   | Unchecked | 8  | Expired        | Expired |
| NA             | Checked   | Unchecked | Unchecked | 3  | Hospice-Horr   | Hospice |
| NA             | Unchecked | Unchecked | Checked   | 5  | Home           | Home    |
| NA             | Unchecked | Unchecked | Checked   | 5  | Home           | Home    |
| NA             | Unchecked | Unchecked | Checked   | 6  | SNF            | SNF     |
| NA             | Checked   | Unchecked | Unchecked | 6  | Home           | Home    |
| NA             | Checked   | Checked   | Checked   | 11 | Expired        | Expired |
| NA             | Unchecked | Unchecked | Checked   | 4  | Home Health    | Home    |
| NA             | Checked   | Unchecked | Unchecked | 0  | Home           | Home    |
| This is an inc | Checked   | Unchecked | Unchecked | 2  | Home           | Home    |
| NA             | Checked   | Unchecked | Unchecked | 5  | Home           | Home    |
| NA             | Checked   | Unchecked | Checked   | 21 | Home           | Home    |
| This is an inc | Checked   | Unchecked | Unchecked | 5  | Rehab          | Rehab   |
| NA             | Checked   | Unchecked | Unchecked | 4  | Home           | Home    |
| NA             | Checked   | Unchecked | Unchecked | 4  | Home Health    | Home    |
| NA             | Checked   | Unchecked | Unchecked | 0  | Home           | Home    |
| NA             | Checked   | Unchecked | Unchecked | 15 | Rehab          | Rehab   |
| NA             | Checked   | Unchecked | Unchecked | 2  | Home           | Home    |
| NA             | Checked   | Unchecked | Unchecked | 6  | Expired        | Expired |
| NA             | Unchecked | Checked   | Checked   | 17 | Home Health    | Home    |
| This is an inc | Checked   | Unchecked | Checked   | 21 | Expired        | Expired |
| NA             | Checked   | Unchecked | Unchecked | 6  | Home           | Home    |
| NA             | Checked   | Checked   | Unchecked | 21 | expired        | Expired |
| NA             | Checked   | Unchecked | Unchecked | 9  | Home           | Home    |
| NA             | Checked   | Unchecked | Unchecked | 1  | Home           | Home    |
| NA             | Checked   | Unchecked | Unchecked | 1  | Home, Self-C   | Home    |
| This is an inc | Checked   | Unchecked | Checked   | 6  | Home           | Home    |
| NA             | Checked   | Unchecked | Unchecked | 2  | Home Health    | Home    |
| NA             | Checked   | Unchecked | Checked   | 8  | Expired        | Expired |
| NA             | Checked   | Unchecked | Checked   | 8  | Home           | Home    |
| NA             | Checked   | Unchecked | Unchecked | 4  | Assited Living | AL      |
| NA             | Checked   | Unchecked | Unchecked | 7  | Home           | Home    |
| NA             | Checked   | Unchecked | Unchecked | 2  | Home Health    | Home    |
| NA             | Checked   | Unchecked | Unchecked | 2  | Home           | Home    |
| NA             | Checked   | Unchecked | Unchecked | 2  | Home           | Home    |
| This is an inc | Checked   | Unchecked | Unchecked | 10 | Home           | Home    |
| This is an inc | Unchecked | Unchecked | Checked   | 4  | Home           | Home    |
| NA             | Checked   | Unchecked | Unchecked | 24 | Rehab          | Rehab   |
| NA             | Checked   | Unchecked | Unchecked | 4  | Home           | Home    |
| NA             | Checked   | Unchecked | Unchecked | 4  | Home           | Home    |
| NA             | Checked   | Unchecked | Unchecked | 5  | SNF            | SNF     |
| NA             | Unchecked | Unchecked | Unchecked | 16 | skilled nursir | SNF     |
| This is a reac | Checked   | Unchecked | Unchecked | 12 | expired        | Expired |
| NA             | Unchecked | Unchecked | Checked   | 5  | Expired        | Expired |
| NA             | Checked   | Unchecked | Checked   | 8  | Home           | Home    |

|                |           |           |           |    |              |         |
|----------------|-----------|-----------|-----------|----|--------------|---------|
| NA             | Checked   | Unchecked | Unchecked | 13 | Home Health  | Home    |
| NA             | Checked   | Unchecked | Unchecked | 5  | Home Health  | Home    |
| NA             | Checked   | Unchecked | Unchecked | 4  | Home         | Home    |
| NA             | Unchecked | Unchecked | Checked   | 10 | Home         | Home    |
| NA             | Checked   | Unchecked | Unchecked | 7  | SNF          | SNF     |
| NA             | Checked   | Unchecked | Unchecked | 9  | Rehab        | Rehab   |
| NA             | Checked   | Unchecked | Unchecked | 1  | SNF          | SNF     |
| NA             | Checked   | Unchecked | Unchecked | 8  | Rehab        | Rehab   |
| NA             | Checked   | Unchecked | Unchecked | 5  | Home Health  | Home    |
| NA             | Checked   | Unchecked | Unchecked | 7  | Home Health  | Home    |
| NA             | Unchecked | Unchecked | Checked   | 39 | Burke rehab  | Rehab   |
| NA             | Checked   | Unchecked | Unchecked | 6  | Rehab        | Rehab   |
| NA             | Checked   | Unchecked | Unchecked | 14 | Hospice-Horr | Hospice |
| NA             | Checked   | Unchecked | Unchecked | 4  | Home         | Home    |
| NA             | Checked   | Unchecked | Unchecked | 14 | Rehab        | Rehab   |
| NA             | Checked   | Unchecked | Unchecked | 1  | home         | Home    |
| NA             | Checked   | Checked   | Checked   | 55 | Acute care h | Rehab   |
| NA             | Checked   | Unchecked | Unchecked | 9  | SNF          | SNF     |
| NA             | Unchecked | Unchecked | Checked   | 4  | SNF          | SNF     |
| NA             | Unchecked | Unchecked | Checked   | 9  | Home Health  | Home    |
| This is a reac | Checked   | Unchecked | Unchecked | 3  | Home         | Home    |
| NA             | Unchecked | Unchecked | Checked   | 9  | Expired      | Expired |
| NA             | Checked   | Unchecked | Unchecked | 17 | SNF          | SNF     |
| NA             | Checked   | Checked   | Unchecked | 12 | Rehab        | Rehab   |
| NA             | Checked   | Unchecked | Unchecked | 3  | Home         | Home    |
| NA             | Unchecked | Checked   | Unchecked | 21 | Expired      | Expired |
| NA             | Checked   | Unchecked | Checked   | 2  | Expired      | Expired |
| NA             | Checked   | Unchecked | Unchecked | 10 | Home Health  | Home    |
| NA             | Checked   | Unchecked | Checked   | 4  | Home         | Home    |
| NA             | Checked   | Unchecked | Unchecked | 4  | Rehab        | Rehab   |
| NA             | Checked   | Unchecked | Unchecked | 11 | Rehab        | Rehab   |
| This is an inc | Checked   | Unchecked | Unchecked | 12 | Long Term C  | NA      |
| NA             | Unchecked | Unchecked | Checked   | 4  | Home         | Home    |
| NA             | Checked   | Unchecked | Unchecked | 1  | Home         | Home    |
| NA             | Checked   | Unchecked | Unchecked | 6  | SNF          | SNF     |
| NA             | Checked   | Unchecked | Unchecked | 0  | Home         | Home    |
| NA             | Checked   | Unchecked | Unchecked | 10 | Expired      | Expired |
| NA             | Unchecked | Unchecked | Checked   | 8  | Home         | Home    |
| NA             | Checked   | Unchecked | Unchecked | 3  | Home         | Home    |
| NA             | Unchecked | Unchecked | Checked   | 5  | Home         | Home    |
| NA             | Checked   | Checked   | Checked   | 43 | acute rehab  | Rehab   |
| NA             | Checked   | Unchecked | Unchecked | 1  | Home         | Home    |
| NA             | Checked   | Unchecked | Unchecked | 6  | Home         | Home    |
| NA             | Checked   | Unchecked | Unchecked | 2  | SNF          | SNF     |
| NA             | Checked   | Checked   | Unchecked | 3  | Home         | Home    |

|                |           |           |           |    |               |         |
|----------------|-----------|-----------|-----------|----|---------------|---------|
| NA             | Checked   | Unchecked | Unchecked | 1  | Home          | Home    |
| NA             | Checked   | Unchecked | Checked   | 18 | Home          | Home    |
| NA             | Checked   | Unchecked | Unchecked | 10 | Expired       | Expired |
| NA             | Unchecked | Checked   | Checked   | 7  | Expired       | Expired |
| This is an inc | Checked   | Unchecked | Unchecked | 7  | Home Health   | Home    |
| NA             | Checked   | Unchecked | Unchecked | 4  | Home          | Home    |
| NA             | Unchecked | Unchecked | Checked   | 4  | Expired       | Expired |
| NA             | Unchecked | Checked   | Checked   | 38 | Rehab         | Rehab   |
| NA             | Unchecked | Unchecked | Checked   | 15 | Home Health   | Home    |
| NA             | Checked   | Unchecked | Unchecked | 4  | Expired       | Expired |
| NA             | Checked   | Unchecked | Unchecked | 1  | Home          | Home    |
| NA             | Checked   | Unchecked | Unchecked | 2  | Home          | Home    |
| NA             | Checked   | Unchecked | Unchecked | 1  | Home          | Home    |
| This is an inc | Checked   | Unchecked | Unchecked | 1  | Home          | Home    |
| NA             | Checked   | Checked   | Checked   | 26 | Long Term C   | NA      |
| NA             | Checked   | Unchecked | Unchecked | 3  | Home          | Home    |
| NA             | Unchecked | Unchecked | Checked   | 1  | Expired       | Expired |
| This is an inc | Checked   | Unchecked | Unchecked | 7  | Home          | Home    |
| NA             | Checked   | Unchecked | Unchecked | 4  | Home Health   | Home    |
| NA             | Checked   | Checked   | Unchecked | 4  | NA            | NA      |
| NA             | Unchecked | Checked   | Checked   | 20 | Expired       | Expired |
| NA             | Checked   | Unchecked | Unchecked | 9  | Home          | Home    |
| NA             | Checked   | Unchecked | Unchecked | 13 | SNF           | SNF     |
| NA             | Checked   | Unchecked | Unchecked | 2  | SNF           | SNF     |
| NA             | Checked   | Unchecked | Checked   | 9  | SNF           | SNF     |
| NA             | Checked   | Unchecked | Unchecked | 3  | Expired       | Expired |
| NA             | Unchecked | Checked   | Checked   | 19 | Expired       | Expired |
| NA             | Checked   | Unchecked | Checked   | 2  | Expired       | Expired |
| This is an inc | Checked   | Checked   | Checked   | 4  | Expired       | Expired |
| NA             | Unchecked | Checked   | Unchecked | 14 | Expired       | Expired |
| This is an inc | Unchecked | Checked   | Unchecked | 25 | Expired       | Expired |
| NA             | Checked   | Unchecked | Unchecked | 3  | Burke Rehab   | Rehab   |
| This is an inc | Unchecked | Unchecked | Checked   | 5  | Home          | Home    |
| This is an inc | Checked   | Unchecked | Unchecked | 8  | Osborn SNF    | SNF     |
| NA             | Checked   | Unchecked | Unchecked | 10 | Home          | Home    |
| NA             | Unchecked | Checked   | Checked   | 33 | Expired       | Expired |
| NA             | Checked   | Unchecked | Unchecked | 4  | Rehab facilit | Rehab   |
| NA             | Checked   | Unchecked | Unchecked | 1  | Home          | Home    |
| NA             | Checked   | Unchecked | Unchecked | 6  | Home          | Home    |
| This is an inc | Checked   | Unchecked | Checked   | 15 | Home          | Home    |
| NA             | Checked   | Unchecked | Unchecked | 5  | Expired       | Expired |
| This is an inc | Checked   | Unchecked | Unchecked | 0  | Expired       | Expired |
| NA             | Checked   | Unchecked | Unchecked | 6  | Home          | Home    |
| NA             | Checked   | Unchecked | Unchecked | 6  | Rehab facilit | Rehab   |
| NA             | Checked   | Unchecked | Unchecked | 11 | Rehab         | Rehab   |



|                |           |           |           |    |                |         |
|----------------|-----------|-----------|-----------|----|----------------|---------|
| NA             | Checked   | Unchecked | Unchecked | 1  | Home           | Home    |
| NA             | Checked   | Unchecked | Unchecked | 2  | Home           | Home    |
| This is an inc | Checked   | Unchecked | Unchecked | 1  | Home           | Home    |
| NA             | Checked   | Unchecked | Unchecked | 4  | Home           | Home    |
| NA             | Unchecked | Checked   | Unchecked | 25 | Expired        | Expired |
| NA             | Checked   | Unchecked | Unchecked | 2  | Home           | Home    |
| NA             | Checked   | Unchecked | Checked   | 3  | Expired        | Expired |
| NA             | Checked   | Unchecked | Unchecked | 9  | Home           | Home    |
| NA             | Checked   | Unchecked | Unchecked | 7  | Rehab          | Rehab   |
| NA             | Unchecked | Unchecked | Checked   | 10 | SNF            | SNF     |
| This is an inc | Unchecked | Checked   | Checked   | 14 | Expired        | Expired |
| NA             | Checked   | Unchecked | Unchecked | 4  | Home           | Home    |
| NA             | Checked   | Unchecked | Unchecked | 4  | Home           | Home    |
| NA             | Checked   | Unchecked | Unchecked | 2  | Home           | Home    |
| NA             | Checked   | Unchecked | Checked   | 10 | home           | Home    |
| NA             | Checked   | Unchecked | Unchecked | 4  | Home           | Home    |
| NA             | Checked   | Unchecked | Unchecked | 1  | Psych facility | PSYCH   |
| NA             | Checked   | Unchecked | Unchecked | 18 | Home           | Home    |
| NA             | Checked   | Unchecked | Unchecked | 3  | Rehab          | Rehab   |
| This is an inc | Checked   | Unchecked | Unchecked | 8  | Home           | Home    |
| NA             | Checked   | Unchecked | Unchecked | 2  | Home           | Home    |
| NA             | Checked   | Unchecked | Unchecked | 3  | Home           | Home    |
| NA             | Checked   | Unchecked | Unchecked | 3  | Home           | Home    |
| NA             | Checked   | Checked   | Checked   | 39 | Expired        | Expired |
| NA             | Checked   | Unchecked | Unchecked | 4  | Home           | Home    |
| NA             | Checked   | Checked   | Checked   | 38 | SNF            | SNF     |
| NA             | Checked   | Unchecked | Unchecked | 7  | Rehab facilit  | Rehab   |
| NA             | Checked   | Unchecked | Unchecked | 4  | Expired        | Expired |
| NA             | Checked   | Unchecked | Unchecked | 4  | NA             | NA      |
| NA             | Checked   | Unchecked | Unchecked | 5  | Home           | Home    |
| NA             | Unchecked | Unchecked | Checked   | 2  | Home           | Home    |
| NA             | Checked   | Checked   | Checked   | 5  | Rehab Facilit  | Rehab   |
| NA             | Checked   | Unchecked | Unchecked | 2  | Rehab - Burk   | Rehab   |
| NA             | Checked   | Checked   | Checked   | 17 | Expired        | Expired |
| This is an inc | Checked   | Unchecked | Unchecked | 4  | Home           | Home    |
| NA             | Checked   | Checked   | Checked   | 11 | Expired        | Expired |
| This is an inc | Checked   | Unchecked | Unchecked | 9  | Rehab          | Rehab   |
| NA             | Checked   | Unchecked | Unchecked | 2  | Rehab          | Rehab   |
| NA             | Checked   | Unchecked | Unchecked | 3  | home           | Home    |
| NA             | Checked   | Unchecked | Unchecked | 3  | Home           | Home    |
| NA             | Checked   | Unchecked | Unchecked | 7  | Rehab - Burk   | Rehab   |
| NA             | Checked   | Unchecked | Unchecked | 3  | Expired        | Expired |
| NA             | Checked   | Unchecked | Unchecked | 2  | Home           | Home    |
| NA             | Unchecked | Unchecked | Checked   | 3  | Home           | Home    |
| NA             | Checked   | Unchecked | Checked   | 11 | Home           | Home    |

|                |           |           |           |    |                |          |
|----------------|-----------|-----------|-----------|----|----------------|----------|
| NA             | Unchecked | Unchecked | Checked   | 3  | Home           | Home     |
| NA             | Unchecked | Unchecked | Unchecked | 4  | Home           | Home     |
| NA             | Unchecked | Checked   | Checked   | 17 | Expired        | Expired  |
| NA             | Checked   | Unchecked | Unchecked | 1  | Home           | Home     |
| NA             | Unchecked | Checked   | Unchecked | 8  | Expired        | Expired  |
| This is an inc | Unchecked | Unchecked | Checked   | 5  | Rehab facilit  | Rehab    |
| This is an inc | Checked   | Unchecked | Unchecked | 6  | Group Home     | Home     |
| NA             | Checked   | Unchecked | Unchecked | 1  | Home           | Home     |
| NA             | Checked   | Unchecked | Unchecked | 1  | Home           | Home     |
| NA             | Unchecked | Unchecked | Checked   | 13 | Nursing Hom    | SNF      |
| This is an inc | Checked   | Unchecked | Unchecked | 2  | Home           | Home     |
| NA             | Checked   | Unchecked | Unchecked | 13 | Home           | Home     |
| NA             | Checked   | Unchecked | Unchecked | 16 | Home           | Home     |
| NA             | Unchecked | Unchecked | Checked   | 5  | Acute Care H   | Transfer |
| NA             | Checked   | Unchecked | Unchecked | 1  | Home           | Home     |
| NA             | Checked   | Unchecked | Checked   | 21 | Short-term r   | Rehab    |
| NA             | Checked   | Unchecked | Unchecked | 5  | Expired        | Expired  |
| NA             | Checked   | Unchecked | Unchecked | 2  | Home           | Home     |
| This is an inc | Unchecked | Unchecked | Checked   | 2  | Expired        | Expired  |
| NA             | Checked   | Unchecked | Unchecked | 2  | Home           | Home     |
| NA             | Checked   | Unchecked | Checked   | 9  | Nursing Facil  | SNF      |
| NA             | Checked   | Unchecked | Unchecked | 7  | Nursing Facil  | SNF      |
| NA             | Checked   | Unchecked | Unchecked | 11 | Nursing facil  | SNF      |
| NA             | Checked   | Checked   | Unchecked | 4  | Home           | Home     |
| NA             | Unchecked | Checked   | Checked   | 12 | Expired        | Expired  |
| NA             | Checked   | Unchecked | Unchecked | 6  | Rehab facilit  | Rehab    |
| NA             | Unchecked | Checked   | Checked   | 30 | Burke rehab    | Rehab    |
| NA             | Checked   | Unchecked | Checked   | 8  | SNF            | SNF      |
| NA             | Checked   | Unchecked | Unchecked | 2  | Expired        | Expired  |
| NA             | Checked   | Unchecked | Unchecked | 5  | Rehab facilit  | Rehab    |
| NA             | Checked   | Unchecked | Unchecked | 1  | SNF            | SNF      |
| NA             | Checked   | Unchecked | Unchecked | 4  | Home           | Home     |
| NA             | Unchecked | Unchecked | Checked   | 12 | Expired        | Expired  |
| This is an inc | Checked   | Unchecked | Unchecked | 3  | Home           | Home     |
| NA             | Checked   | Unchecked | Checked   | 10 | Psych Facility | PSYCH    |
| This is an inc | Checked   | Unchecked | Checked   | 20 | Rehab facilit  | Rehab    |
| NA             | Checked   | Unchecked | Unchecked | 5  | Nursing Facil  | SNF      |
| NA             | Checked   | Checked   | Checked   | 12 | Rehab facilit  | Rehab    |
| NA             | Checked   | Unchecked | Unchecked | 6  | Expired        | Expired  |
| NA             | Checked   | Unchecked | Unchecked | 4  | Home           | Home     |
| NA             | Checked   | Unchecked | Unchecked | 4  | Nursing Facil  | SNF      |
| NA             | Checked   | Unchecked | Unchecked | 1  | Home           | Home     |
| NA             | Checked   | Unchecked | Unchecked | 3  | Home           | Home     |
| NA             | Checked   | Unchecked | Unchecked | 10 | Home           | Home     |
| NA             | Unchecked | Unchecked | Checked   | 3  | Home           | Home     |

|                |           |           |           |    |             |         |
|----------------|-----------|-----------|-----------|----|-------------|---------|
| NA             | Checked   | Unchecked | Unchecked | 0  | Expired     | Expired |
| This is an inc | Unchecked | Unchecked | Checked   | 1  | Expired     | Expired |
| NA             | Checked   | Unchecked | Unchecked | 7  | Home        | Home    |
| NA             | Checked   | Unchecked | Unchecked | 4  | ROUTINE/HC  | Home    |
| This is an inc | Checked   | Unchecked | Unchecked | 2  | TO HOME W   | Home    |
| NA             | Checked   | Unchecked | Unchecked | 4  | TO HOME W   | Home    |
| NA             | Checked   | Unchecked | Unchecked | 2  | ROUTINE/HC  | Home    |
| NA             | Checked   | Unchecked | Unchecked | 8  | EXPIRED     | Expired |
| NA             | Unchecked | Checked   | Unchecked | 1  | expire      | Expired |
| NA             | Checked   | Unchecked | Unchecked | 5  | ROUTINE/HC  | Home    |
| NA             | Unchecked | Unchecked | Checked   | 3  | Expired     | Expired |
| NA             | Checked   | Unchecked | Unchecked | 1  | ROUTINE/HC  | Home    |
| NA             | Checked   | Unchecked | Unchecked | 7  | ROUTINE/HC  | Home    |
| NA             | Checked   | Unchecked | Unchecked | 5  | ROUTINE/HC  | Home    |
| This is an inc | Checked   | Checked   | Checked   | 7  | XFER TO PHY | Rehab   |
| NA             | Unchecked | Checked   | Unchecked | 13 | Expired     | Expired |
| NA             | Unchecked | Checked   | Unchecked | 5  | Expired     | Expired |
| This is an inc | Checked   | Unchecked | Checked   | 10 | Hospice     | Hospice |
| NA             | Checked   | Unchecked | Unchecked | 4  | Expired     | Expired |
| NA             | Checked   | Unchecked | Unchecked | 1  | Hospice     | Hospice |
| This is an inc | Checked   | Unchecked | Checked   | 20 | SKILLED NUR | SNF     |
| NA             | Checked   | Unchecked | Unchecked | 2  | XFER TO PHY | Rehab   |
| NA             | Checked   | Checked   | Unchecked | 45 | XFER TO PHY | Rehab   |
| NA             | Checked   | Unchecked | Unchecked | 2  | ROUTINE/HC  | Home    |
| NA             | Checked   | Unchecked | Unchecked | 1  | ROUTINE/HC  | Home    |
| NA             | Checked   | Unchecked | Unchecked | 10 | SKILLED NUR | SNF     |
| NA             | Checked   | Unchecked | Unchecked | 2  | TO HOME W   | Home    |
| NA             | Checked   | Unchecked | Checked   | 4  | Expired     | Expired |
| NA             | Checked   | Unchecked | Unchecked | 11 | XFER TO PHY | Rehab   |
| NA             | Checked   | Checked   | Unchecked | 3  | Expired     | Expired |
| NA             | Checked   | Unchecked | Unchecked | 2  | ROUTINE/HC  | Home    |
| NA             | Checked   | Unchecked | Unchecked | 7  | SKILLED NUR | SNF     |
| NA             | Checked   | Unchecked | Unchecked | 1  | Expired     | Expired |
| This is an inc | Checked   | Checked   | Checked   | 18 | TO HOME W   | Home    |
| NA             | Checked   | Unchecked | Unchecked | 11 | SKILLED NUR | SNF     |
| NA             | Checked   | Unchecked | Checked   | 4  | TO HOME W   | Home    |
| NA             | Unchecked | Unchecked | Checked   | 25 | Other Acute | SNF     |
| NA             | Checked   | Unchecked | Unchecked | 3  | Hospice     | Hospice |
| NA             | Checked   | Checked   | Unchecked | 43 | XFER REHAB  | Rehab   |
| NA             | Checked   | Checked   | Checked   | 39 | Expired     | Expired |
| NA             | Checked   | Checked   | Checked   | 36 | XFER TO PHY | Rehab   |
| NA             | Checked   | Unchecked | Checked   | 3  | ROUTINE/HC  | Home    |
| NA             | Checked   | Unchecked | Unchecked | 8  | ROUTINE/HC  | Home    |
| NA             | Checked   | Unchecked | Unchecked | 3  | ROUTINE/HC  | Home    |
| NA             | Checked   | Unchecked | Unchecked | 3  | ROUTINE/HC  | Home    |

|                |           |           |           |    |             |         |
|----------------|-----------|-----------|-----------|----|-------------|---------|
| This is an inc | Checked   | Unchecked | Unchecked | 3  | TO HOME W   | Home    |
| NA             | Checked   | Unchecked | Unchecked | 3  | ROUTINE/HC  | Home    |
| NA             | Checked   | Unchecked | Unchecked | 8  | Expired     | Expired |
| NA             | Checked   | Unchecked | Unchecked | 1  | ROUTINE/HC  | Home    |
| NA             | Checked   | Checked   | Checked   | 19 | XFER TO PHY | Rehab   |
| NA             | Checked   | Unchecked | Unchecked | 1  | ROUTINE/HC  | Home    |
| NA             | Checked   | Unchecked | Unchecked | 2  | ROUTINE/HC  | Home    |
| This is a reac | Unchecked | Unchecked | Checked   | 6  | XFER TO PHY | Rehab   |
| NA             | Checked   | Unchecked | Checked   | 9  | ROUTINE/HC  | Home    |
| NA             | Unchecked | Unchecked | Checked   | 9  | SKILLED NUR | SNF     |
| NA             | Checked   | Unchecked | Unchecked | 4  | ROUTINE/HC  | Home    |
| NA             | Checked   | Unchecked | Unchecked | 3  | TO HOME W   | Home    |
| NA             | Checked   | Checked   | Unchecked | 12 | Expired     | Expired |
| NA             | Unchecked | Unchecked | Checked   | 7  | Expired     | Expired |
| This is an inc | Checked   | Unchecked | Unchecked | 4  | SKILLED NUR | SNF     |
| NA             | Checked   | Unchecked | Checked   | 10 | ROUTINE/HC  | Home    |
| NA             | Checked   | Unchecked | Checked   | 8  | TO HOME W   | Home    |
| NA             | Checked   | Unchecked | Checked   | 11 | Expired     | Expired |
| NA             | Unchecked | Unchecked | Checked   | 10 | Expired     | Expired |
| NA             | Checked   | Checked   | Unchecked | 5  | TO HOME W   | Home    |
| NA             | Checked   | Checked   | Checked   | 48 | SKILLED NUR | SNF     |
| NA             | Checked   | Unchecked | Checked   | 5  | TO HOME W   | Home    |
| This is an inc | Checked   | Checked   | Checked   | 15 | Expired     | Expired |
| NA             | Checked   | Unchecked | Checked   | 13 | ROUTINE/HC  | Home    |
| NA             | Checked   | Unchecked | Unchecked | 10 | ROUTINE/HC  | Home    |
| This is an inc | Checked   | Unchecked | Checked   | 5  | ROUTINE/HC  | Home    |
| NA             | Checked   | Unchecked | Unchecked | 1  | Expired     | Expired |
| NA             | Checked   | Unchecked | Unchecked | 5  | ROUTINE/HC  | Home    |
| NA             | Checked   | Unchecked | Unchecked | 1  | ROUTINE/HC  | Home    |
| NA             | Checked   | Unchecked | Unchecked | 4  | XFER TO PHY | Rehab   |
| NA             | Checked   | Unchecked | Unchecked | 4  | TO HOME W   | Home    |
| NA             | Checked   | Checked   | Checked   | 26 | Expired     | Expired |
| NA             | Checked   | Unchecked | Checked   | 7  | ROUTINE/HC  | Home    |
| NA             | Unchecked | Checked   | Unchecked | 29 | XFER TO PHY | Rehab   |
| NA             | Unchecked | Unchecked | Checked   | 23 | SKILLED NUR | SNF     |
| NA             | Checked   | Checked   | Checked   | 12 | Expired     | Expired |
| NA             | Checked   | Unchecked | Unchecked | 4  | ROUTINE/HC  | Home    |
| NA             | Checked   | Unchecked | Checked   | 20 | ROUTINE/HC  | Home    |
| This is an inc | Checked   | Unchecked | Unchecked | 3  | TO HOME W   | Home    |
| This is an inc | Checked   | Checked   | Unchecked | 11 | Expired     | Expired |
| NA             | Checked   | Unchecked | Checked   | 2  | ROUTINE/HC  | Home    |
| NA             | Checked   | Unchecked | Unchecked | 8  | XFER TO PHY | Rehab   |
| NA             | Checked   | Unchecked | Unchecked | 9  | XFER TO PHY | Rehab   |
| NA             | Checked   | Unchecked | Checked   | 9  | TO HOME W   | Home    |
| NA             | Checked   | Unchecked | Unchecked | 3  | ROUTINE/HC  | Home    |

|                |           |           |           |    |                     |         |
|----------------|-----------|-----------|-----------|----|---------------------|---------|
| NA             | Checked   | Unchecked | Unchecked | 12 | ROUTINE/HC Home     |         |
| This is an inc | Checked   | Unchecked | Unchecked | 1  | ROUTINE/HC Home     |         |
| NA             | Checked   | Unchecked | Unchecked | 3  | ROUTINE/HC Home     |         |
| This is an inc | Checked   | Checked   | Unchecked | 8  | Expired             | Expired |
| NA             | Checked   | Unchecked | Unchecked | 1  | Expired             | Expired |
| NA             | Unchecked | Unchecked | Checked   | 1  | ROUTINE/HC Home     |         |
| NA             | Checked   | Unchecked | Checked   | 7  | ROUTINE/HC Home     |         |
| NA             | Unchecked | Checked   | Checked   | 12 | Expired             | Expired |
| NA             | Checked   | Unchecked | Unchecked | 4  | ROUTINE/HC Home     |         |
| NA             | Checked   | Checked   | Checked   | 33 | Expired             | Expired |
| NA             | Checked   | Checked   | Checked   | 65 | SKILLED NUR SNF     |         |
| NA             | Unchecked | Checked   | Checked   | 8  | Expired             | Expired |
| This is an inc | Checked   | Checked   | Checked   | 14 | Expired             | Expired |
| This is an inc | Checked   | Unchecked | Unchecked | 3  | ROUTINE/HC Home     |         |
| NA             | Checked   | Unchecked | Unchecked | 5  | SKILLED NUR SNF     |         |
| NA             | Unchecked | Checked   | Checked   | 9  | Expired             | Expired |
| This is an inc | Checked   | Unchecked | Checked   | 11 | Expired             | Expired |
| This is an inc | Checked   | Unchecked | Unchecked | 9  | SKILLED NUR SNF     |         |
| This is an inc | Checked   | Unchecked | Checked   | 15 | XFER TO PHY Rehab   |         |
| This is an inc | Checked   | Unchecked | Unchecked | 1  | Expired             | Expired |
| NA             | Checked   | Unchecked | Checked   | 18 | SKILLED NUR SNF     |         |
| NA             | Checked   | Unchecked | Unchecked | 2  | ROUTINE/HC Home     |         |
| This is an inc | Checked   | Unchecked | Unchecked | 6  | Expired             | Expired |
| NA             | Checked   | Checked   | Checked   | 9  | ROUTINE/HC Home     |         |
| NA             | Checked   | Unchecked | Unchecked | 2  | ROUTINE/HC Home     |         |
| NA             | Unchecked | Checked   | Unchecked | 1  | Home                | Home    |
| NA             | Checked   | Checked   | Checked   | 34 | expired             | Expired |
| NA             | Checked   | Unchecked | Checked   | 14 | Home                | Home    |
| NA             | Checked   | Unchecked | Unchecked | 12 | Home                | Home    |
| NA             | Checked   | Checked   | Unchecked | 46 | Skilled nursir SNF  |         |
| NA             | Unchecked | Unchecked | Checked   | 7  | Home                | Home    |
| NA             | Checked   | Unchecked | Unchecked | 8  | acute in pati Rehab |         |
| This is an inc | Checked   | Unchecked | Unchecked | 1  | Home                | Home    |
| NA             | Checked   | Unchecked | Checked   | 16 | Home                | Home    |
| NA             | Unchecked | Checked   | Checked   | 3  | Expired             | Expired |
| NA             | Unchecked | Unchecked | Checked   | 5  | Expired             | Expired |
| NA             | Unchecked | Unchecked | Checked   | 1  | Home                | Home    |
| This is an inc | Checked   | Unchecked | Checked   | 4  | Home                | Home    |
| NA             | Checked   | Unchecked | Unchecked | 1  | Home                | Home    |
| NA             | Checked   | Unchecked | Unchecked | 4  | Expired             | Expired |
| NA             | Unchecked | Unchecked | Unchecked | 1  | Home                | Home    |
| NA             | Checked   | Unchecked | Unchecked | 3  | Home                | Home    |
| NA             | Checked   | Unchecked | Unchecked | 8  | acute care h Rehab  |         |
| NA             | Checked   | Unchecked | Unchecked | 5  | Home                | Home    |
| NA             | Checked   | Checked   | Unchecked | 15 | Expired             | Expired |

|                |           |           |           |                  |          |
|----------------|-----------|-----------|-----------|------------------|----------|
| NA             | Checked   | Unchecked | Unchecked | 5 SNF            | SNF      |
| NA             | Checked   | Checked   | Unchecked | 12 inpatient reh | Rehab    |
| NA             | Checked   | Unchecked | Unchecked | 8 Expired        | Expired  |
| NA             | Checked   | Unchecked | Unchecked | 6 SNF            | SNF      |
| NA             | Checked   | Unchecked | Unchecked | 6 Home           | Home     |
| NA             | Unchecked | Checked   | Checked   | 9 Expired        | Expired  |
| NA             | Unchecked | Unchecked | Checked   | 1 home           | Home     |
| NA             | Checked   | Checked   | Checked   | 35 SNF           | SNF      |
| This is an inc | Checked   | Unchecked | Unchecked | 8 Home           | Home     |
| NA             | Checked   | Unchecked | Unchecked | 8 Home           | Home     |
| This is an inc | Checked   | Unchecked | Unchecked | 1 Expired        | Expired  |
| NA             | Checked   | Unchecked | Unchecked | 7 Expired        | Expired  |
| NA             | Checked   | Unchecked | Unchecked | 4 SNF            | SNF      |
| NA             | Checked   | Unchecked | Checked   | 10 SNF           | SNF      |
| This is an inc | Checked   | Unchecked | Unchecked | 3 SNF            | SNF      |
| NA             | Checked   | Unchecked | Unchecked | 3 Home           | Home     |
| NA             | Checked   | Unchecked | Unchecked | 2 Home           | Home     |
| This is an inc | Checked   | Unchecked | Checked   | 3 home           | Home     |
| NA             | Checked   | Unchecked | Unchecked | 6 inpatient reh  | Rehab    |
| NA             | Checked   | Unchecked | Unchecked | 11 Acute care h  | Transfer |
| NA             | Checked   | Unchecked | Unchecked | 38 SNF           | SNF      |
| NA             | Unchecked | Unchecked | Checked   | 10 SNF           | SNF      |
| NA             | Checked   | Unchecked | Unchecked | 3 Expired        | Expired  |
| NA             | Checked   | Unchecked | Checked   | 14 home          | Home     |
| NA             | Checked   | Unchecked | Unchecked | 7 SNF            | SNF      |
| NA             | Unchecked | Unchecked | Unchecked | 2 Home           | Home     |
| NA             | Unchecked | Unchecked | Checked   | 2 Home           | Home     |
| NA             | Checked   | Unchecked | Checked   | 4 Home           | Home     |
| This is an inc | Checked   | Unchecked | Unchecked | 5 Expired        | Expired  |
| NA             | Unchecked | Checked   | Checked   | 9 Expired        | Expired  |
| NA             | Checked   | Unchecked | Unchecked | 8 SNF            | SNF      |
| NA             | Unchecked | Unchecked | Checked   | 1 Home           | Home     |
| NA             | Checked   | Unchecked | Checked   | 5 SNF            | SNF      |
| This is an inc | Checked   | Unchecked | Checked   | 9 Home           | Home     |
| This is an inc | Checked   | Unchecked | Unchecked | 6 in patient rel | Rehab    |
| NA             | Checked   | Unchecked | Unchecked | 2 Home           | Home     |
| This is an inc | Checked   | Unchecked | Unchecked | 2 Expired        | Expired  |
| NA             | Checked   | Checked   | Checked   | 11 Expired       | Expired  |
| NA             | Checked   | Unchecked | Unchecked | 5 Home           | Home     |
| NA             | Checked   | Unchecked | Unchecked | 4 SNF            | SNF      |
| NA             | Checked   | Unchecked | Unchecked | 3 SNF            | SNF      |
| NA             | Checked   | Unchecked | Unchecked | 5 Expired        | Expired  |
| NA             | Checked   | Unchecked | Unchecked | 4 Home           | Home     |
| NA             | Unchecked | Unchecked | Checked   | 5 Home           | Home     |
| NA             | Checked   | Unchecked | Unchecked | 7 home           | Home     |

|                |           |           |           |                        |
|----------------|-----------|-----------|-----------|------------------------|
| NA             | Checked   | Unchecked | Unchecked | 6 Home Health Home     |
| NA             | Checked   | Unchecked | Unchecked | 5 Home Health Home     |
| NA             | Checked   | Unchecked | Unchecked | 14 Home Health Home    |
| This is an inc | Unchecked | Checked   | Unchecked | 33 Xfer Other Transfer |
| NA             | Unchecked | Checked   | Unchecked | 62 Expired Expired     |
| NA             | Checked   | Unchecked | Unchecked | 20 Other Acute SNF     |
| NA             | Checked   | Unchecked | Unchecked | 38 Other Acute SNF     |

|     |     |          |       |       |              |
|-----|-----|----------|-------|-------|--------------|
| No  | No  | Complete | 167.6 | 84.6  | 30.12 UNK    |
| No  | No  | Complete | 175.3 | 59.9  | 19.49 UNK    |
| No  | No  | Complete | 154.9 | 63.5  | 26.46 UNK    |
| No  | No  | Complete | 167.6 | 80.3  | 28.59 O POS  |
| No  | No  | Complete | 152.4 | 75    | 32.29 UNK    |
| No  | No  | Complete | 168   | 80.2  | 28.42 UNK    |
| No  | Yes | Complete | 182.9 | 86.4  | 25.83 UNK    |
| No  | Yes | Complete | 165.1 | 62.2  | 22.82 UNK    |
| No  | No  | Complete | 170.2 | 90.7  | 31.31 UNK    |
| No  | No  | Complete | 150   | 67.3  | 29.91 UNK    |
| No  | No  | Complete | 172   | 83.5  | 28.22 UNK    |
| No  | No  | Complete | 157.5 | 56.8  | 22.9 UNK     |
| No  | No  | Complete | 165.1 | 63.4  | 23.26 O POS  |
| No  | Yes | Complete | 162.2 | 88.2  | 33.52 UNK    |
| No  | No  | Complete | 172.7 | 56.8  | 19.04 UNK    |
| No  | No  | Complete | 161   | 89.1  | 34.37 UNK    |
| No  | No  | Complete | 165.1 | 81.8  | 30.01 UNK    |
| No  | No  | Complete | 165   | 88.6  | 32.54 UNK    |
| No  | No  | Complete | 165.1 | 63.6  | 23.33 A POS  |
| No  | No  | Complete | 162.6 | 65.9  | 24.93 UNK    |
| No  | Yes | Complete | 165   | 73.6  | 27.03 UNK    |
| No  | No  | Complete | 165.1 | 126   | 46.22 UNK    |
| No  | No  | Complete | 149.9 | 63.6  | 28.3 UNK     |
| No  | Yes | Complete | 176.4 | 80    | 25.71 B POS  |
| No  | No  | Complete | 162   | 122.7 | 46.75 AB POS |
| No  | No  | Complete | 162.6 | 61.4  | 23.22 UNK    |
| No  | No  | Complete | 167.6 | 99.8  | 35.53 UNK    |
| No  | Yes | Complete | 162   | 99    | 37.72 UNK    |
| Yes | No  | Complete | 180.3 | 112   | 34.45 A POS  |
| No  | No  | Complete | 170.2 | 77.1  | 26.62 A POS  |
| No  | No  | Complete | 172.7 | 104.6 | 35.07 A POS  |
| No  | No  | Complete | 160   | 78    | 30.47 O POS  |
| No  | No  | Complete | 152.4 | 63.6  | 27.38 UNK    |
| No  | No  | Complete | 162.6 | 93    | 35.18 UNK    |
| No  | No  | Complete | 175.3 | 78.2  | 25.45 A POS  |
| No  | No  | Complete | 157.5 | 81.8  | 32.98 UNK    |
| No  | No  | Complete | 172.7 | 81.8  | 27.43 UNK    |
| No  | No  | Complete | 172.7 | 81.8  | 27.43 UNK    |
| No  | No  | Complete | 174   | 79.9  | 26.39 UNK    |
| No  | No  | Complete | 167.6 | 69.5  | 24.74 O POS  |
| No  | No  | Complete | 172.7 | 92.3  | 30.95 UNK    |
| No  | No  | Complete | 177.8 | 90.7  | 28.69 UNK    |
| No  | No  | Complete | 170   | 84.1  | 29.1 UNK     |
| No  | No  | Complete | 157.5 | 51.7  | 20.84 UNK    |
| No  | No  | Complete | 165.1 | 98.2  | 36.03 UNK    |



|    |     |          |        |       |             |
|----|-----|----------|--------|-------|-------------|
| No | No  | Complete | 160.02 | 63.5  | 24.8 B POS  |
| No | No  | Complete | 160.02 | 86.8  | 33.9 UNK    |
| No | No  | Complete | 157.48 | 56.4  | 22.74 UNK   |
| No | No  | Complete | 175.26 | 65.9  | 21.45 UNK   |
| No | No  | Complete | 157.48 | 95.3  | 38.43 UNK   |
| No | Yes | Complete | 170    | 95.5  | 33.04 UNK   |
| No | No  | Complete | 172.7  | 68    | 22.8 O POS  |
| No | Yes | Complete | 172.7  | 88.1  | 29.54 O POS |
| No | No  | Complete | 170.69 | 86.4  | 29.65 O POS |
| No | No  | Complete | 183    | 113   | 33.74 UNK   |
| No | Yes | Complete | 142.24 | 93.6  | 46.26 UNK   |
| No | No  | Complete | 165.1  | 77.3  | 28.36 B POS |
| No | No  | Complete | 162.56 | 77.3  | 29.25 UNK   |
| No | No  | Complete | 167.64 | 72.7  | 25.87 UNK   |
| No | No  | Complete | 167.64 | 68    | 24.2 O NEG  |
| No | No  | Complete | 172.7  | 88.6  | 29.71 UNK   |
| No | No  | Complete | 167.64 | 77.3  | 27.51 UNK   |
| No | No  | Complete | 163    | 67.6  | 25.44 UNK   |
| No | No  | Complete | 149.86 | 77.1  | 34.33 B POS |
| No | Yes | Complete | 162.56 | 90.7  | 34.32 UNK   |
| No | Yes | Complete | 154    | 75    | 31.62 UNK   |
| No | No  | Complete | 180.34 | 129.6 | 39.85 UNK   |
| No | No  | Complete | 165.1  | 90    | 33.02 UNK   |
| No | No  | Complete | 177.8  | 104.6 | 33.09 UNK   |
| No | No  | Complete | 165.1  | 81.8  | 30.01 UNK   |
| No | Yes | Complete | 185.42 | 109.1 | 31.73 UNK   |
| No | Yes | Complete | 162.56 | 70.5  | 26.68 UNK   |
| No | No  | Complete | 167.64 | 109.1 | 38.82 UNK   |
| No | No  | Complete | 167.64 | 62.2  | 22.13 UNK   |
| No | No  | Complete | 165.1  | 62.2  | 22.82 A POS |
| No | No  | Complete | 167.64 | 74.4  | 26.47 UNK   |
| No | No  | Complete | 176.4  | 163.5 | 52.54 UNK   |
| No | No  | Complete | 176.4  | 56    | 18 UNK      |
| No | No  | Complete | 170    | 86.8  | 30.03 O POS |
| No | No  | Complete | 167.64 | 79.6  | 28.32 A POS |
| No | Yes | Complete | 170.18 | 65.8  | 22.72 O POS |
| No | No  | Complete | 170.18 | 77.3  | 26.69 O POS |
| No | No  | Complete | 172    | 127   | 42.93 A POS |
| No | No  | Complete | 165.1  | 86.4  | 31.7 UNK    |
| No | No  | Complete | 175.26 | 67.6  | 22.01 UNK   |
| No | Yes | Complete | 173    | 81.8  | 27.33 UNK   |
| No | No  | Complete | 170.08 | 81.8  | 28.28 UNK   |
| No | Yes | Complete | 167.64 | 92.1  | 32.77 UNK   |
| No | No  | Complete | 177.8  | 95.3  | 30.15 UNK   |
| No | No  | Complete | 165    | 68.2  | 25.05 UNK   |

|    |     |          |        |       |              |
|----|-----|----------|--------|-------|--------------|
| No | No  | Complete | 167.64 | 63.6  | 22.63 UNK    |
| No | No  | Complete | 149.86 | 50    | 22.26 B POS  |
| No | No  | Complete | 160.02 | 95.5  | 37.3 B POS   |
| No | No  | Complete | 177.8  | 106.8 | 33.78 UNK    |
| No | Yes | Complete | 162.56 | 56.8  | 21.49 AB POS |
| No | Yes | Complete | 160.02 | 63.6  | 24.84 UNK    |
| No | Yes | Complete | 177.8  | 95.5  | 30.21 UNK    |
| No | No  | Complete | 157.48 | 68.2  | 27.5 UNK     |
| No | No  | Complete | 160.02 | 92.5  | 36.12 UNK    |
| No | Yes | Complete | 170.18 | 90.9  | 31.39 UNK    |
| No | No  | Complete | 178    | 71.8  | 22.66 UNK    |
| No | No  | Complete | 170.2  | 68.4  | 23.61 UNK    |
| No | Yes | Complete | 177.8  | 90    | 28.47 UNK    |
| No | No  | Complete | 170.18 | 78.6  | 27.14 A POS  |
| No | No  | Complete | 177.8  | 95.5  | 30.21 UNK    |
| No | No  | Complete | 165.1  | 79.4  | 29.13 UNK    |
| No | Yes | Complete | 180    | 85    | 26.23 UNK    |
| No | No  | Complete | 164.9  | 58.9  | 21.66 UNK    |
| No | Yes | Complete | 177.8  | 82.9  | 26.22 UNK    |
| No | No  | Complete | 165.1  | 68.2  | 25.02 UNK    |
| No | No  | Complete | 165.1  | 68.2  | 25.02 UNK    |
| No | No  | Complete | 175    | 75    | 24.49 O POS  |
| No | Yes | Complete | 170.1  | 96.4  | 33.32 A POS  |
| No | Yes | Complete | 170.2  | 99    | 34.18 O POS  |
| No | No  | Complete | 167.6  | 70.5  | 25.1 O POS   |
| No | No  | Complete | 167.6  | 70.5  | 25.1 O POS   |
| No | Yes | Complete | 180.3  | 81.8  | 25.16 B POS  |
| No | No  | Complete | 180.3  | 158.8 | 48.85 UNK    |
| No | No  | Complete | 182    | 100   | 30.19 O POS  |
| No | Yes | Complete | 172.7  | 109.1 | 36.58 UNK    |
| No | No  | Complete | 166.3  | 81.5  | 29.47 O POS  |
| No | Yes | Complete | 177.8  | 95    | 30.05 UNK    |
| No | No  | Complete | 186.5  | 118.4 | 34.04 UNK    |
| No | No  | Complete | 175.3  | 79.4  | 25.84 UNK    |
| No | No  | Complete | 160.2  | 59    | 22.99 UNK    |
| No | No  | Complete | 172.7  | 95.5  | 32.02 UNK    |
| No | No  | Complete | 167.6  | 50    | 17.8 UNK     |
| No | No  | Complete | 170.2  | 112.5 | 38.84 UNK    |
| No | Yes | Complete | 160    | 115.6 | 45.16 A POS  |
| No | No  | Complete | 177.8  | 135   | 42.7 UNK     |
| No | No  | Complete | 177.8  | 93.2  | 29.48 UNK    |
| No | No  | Complete | 172.7  | 67.6  | 22.67 UNK    |
| No | No  | Complete | 172.7  | 67.7  | 22.7 A POS   |
| No | No  | Complete | 167.6  | 71.4  | 25.42 UNK    |
| No | Yes | Complete | 162.8  | 104   | 39.24 UNK    |

|     |     |          |        |       |             |
|-----|-----|----------|--------|-------|-------------|
| No  | No  | Complete | 170.1  | 104.3 | 36.05 UNK   |
| No  | No  | Complete | 177.8  | 90.7  | 28.69 UNK   |
| No  | No  | Complete | 166.3  | 72    | 26.03 UNK   |
| No  | Yes | Complete | 170.1  | 79.3  | 27.41 UNK   |
| No  | No  | Complete | 162.5  | 68.1  | 25.79 UNK   |
| No  | Yes | Complete | 165.1  | 72.7  | 26.67 UNK   |
| No  | No  | Complete | 165.1  | 63.6  | 23.33 UNK   |
| No  | Yes | Complete | 160    | 72.7  | 28.4 A POS  |
| No  | No  | Complete | 154.9  | 72.6  | 30.26 UNK   |
| No  | No  | Complete | 162.6  | 54.6  | 20.65 O POS |
| No  | No  | Complete | 160    | 59.1  | 23.09 UNK   |
| No  | No  | Complete | 154.9  | 91    | 37.93 UNK   |
| No  | No  | Complete | 165.1  | 95.3  | 34.96 UNK   |
| No  | No  | Complete | 177.8  | 90.9  | 28.75 UNK   |
| No  | Yes | Complete | 165.1  | 85.7  | 31.44 UNK   |
| No  | No  | Complete | 155    | 94.2  | 39.21 O POS |
| No  | No  | Complete | 177.8  | 111.1 | 35.14 UNK   |
| No  | Yes | Complete | 160    | 74.8  | 29.22 O NEG |
| No  | Yes | Complete | 177.8  | 86.4  | 27.33 UNK   |
| No  | Yes | Complete | 177.8  | 90.9  | 28.75 UNK   |
| No  | No  | Complete | 162.6  | 67.1  | 25.38 UNK   |
| No  | Yes | Complete | 161.5  | 75.9  | 29.1 UNK    |
| No  | No  | Complete | 182    | 97.7  | 29.5 UNK    |
| No  | No  | Complete | 180.3  | 135   | 41.53 UNK   |
| No  | No  | Complete | 157.5  | 70.5  | 28.42 A POS |
| No  | No  | Complete | 165.1  | 110   | 40.36 UNK   |
| No  | No  | Complete | 172.7  | 72.7  | 24.38 UNK   |
| No  | No  | Complete | 175.3  | 153   | 49.79 UNK   |
| No  | No  | Complete | 167.6  | 54.5  | 19.4 UNK    |
| No  | No  | Complete | 160    | 72.7  | 28.4 UNK    |
| No  | No  | Complete | 193    | 118.1 | 31.71 UNK   |
| No  | No  | Complete | 182.8  | 118.1 | 35.34 UNK   |
| No  | No  | Complete | 157.4  | 127.2 | 51.34 UNK   |
| No  | Yes | Complete | 152.4  | 81.8  | 35.22 UNK   |
| Yes | Yes | Complete | 180.3  | 100.2 | 30.82 UNK   |
| No  | No  | Complete | 160    | 72    | 28.13 O POS |
| No  | No  | Complete | 164    | 90.7  | 33.72 UNK   |
| No  | No  | Complete | 188.98 | 88.6  | 24.81 UNK   |
| No  | Yes | Complete | 170.18 | 95.3  | 32.91 UNK   |
| No  | No  | Complete | 170    | 109.1 | 37.75 UNK   |
| No  | No  | Complete | 162.56 | 77.3  | 29.25 UNK   |
| No  | No  | Complete | 154.94 | 46.8  | 19.49 UNK   |
| No  | Yes | Complete | 157.48 | 79.6  | 32.1 UNK    |
| No  | Yes | Complete | 175.3  | 77.3  | 25.15 O POS |
| No  | No  | Complete | 170    | 68    | 23.53 UNK   |

|     |     |          |        |       |             |
|-----|-----|----------|--------|-------|-------------|
| No  | Yes | Complete | 149    | 62.1  | 27.97 UNK   |
| No  | No  | Complete | 152.4  | 57.2  | 24.63 UNK   |
| No  | No  | Complete | 158    | 62    | 24.84 UNK   |
| No  | No  | Complete | 167.4  | 59    | 21.05 UNK   |
| No  | No  | Complete | 160.02 | 59.1  | 23.08 UNK   |
| No  | Yes | Complete | 167.64 | 109.1 | 38.82 UNK   |
| No  | No  | Complete | 162.56 | 88    | 33.3 UNK    |
| No  | Yes | Complete | 129.54 | 54.6  | 32.54 UNK   |
| No  | No  | Complete | 58     | 45    | 135.1 A POS |
| No  | No  | Complete | 162.5  | 100.3 | 37.98 UNK   |
| No  | No  | Complete | 177.8  | 88.6  | 28.03 UNK   |
| No  | Yes | Complete | 172.72 | 68.2  | 22.86 UNK   |
| No  | No  | Complete | 175.26 | 72.7  | 23.67 UNK   |
| No  | No  | Complete | 177    | 85    | 27.13 O POS |
| No  | No  | Complete | 165.1  | 68.2  | 25.02 UNK   |
| No  | No  | Complete | 162.56 | 72.6  | 27.47 UNK   |
| No  | No  | Complete | 152.4  | 63.5  | 27.34 UNK   |
| No  | No  | Complete | 165.1  | 68.2  | 25.02 UNK   |
| No  | No  | Complete | 170    | 81.6  | 28.24 UNK   |
| No  | No  | Complete | 170.18 | 90.9  | 31.39 UNK   |
| No  | No  | Complete | 167.6  | 65.9  | 23.46 UNK   |
| No  | Yes | Complete | 183    | 94.9  | 28.34 UNK   |
| No  | No  | Complete | 187.96 | 97.1  | 27.48 A NEG |
| No  | No  | Complete | 162.6  | 63.6  | 24.06 UNK   |
| No  | Yes | Complete | 162.6  | 54.6  | 20.65 UNK   |
| No  | Yes | Complete | 157.4  | 63    | 25.43 UNK   |
| No  | No  | Complete | 175.3  | 77.3  | 25.15 B POS |
| No  | No  | Complete | 165.1  | 109.1 | 40.02 UNK   |
| No  | No  | Complete | 165.1  | 55.9  | 20.51 O POS |
| No  | No  | Complete | 177.8  | 84.5  | 26.73 A POS |
| No  | No  | Complete | 167.6  | 81.8  | 29.12 UNK   |
| No  | No  | Complete | 162.6  | 85.9  | 32.49 B POS |
| No  | No  | Complete | 180.3  | 90.1  | 27.72 UNK   |
| No  | No  | Complete | 182.9  | 81.8  | 24.45 UNK   |
| No  | No  | Complete | 127    | 40.9  | 25.36 O POS |
| No  | No  | Complete | 166    | 75    | 27.22 UNK   |
| No  | No  | Complete | 152.4  | 72.7  | 31.3 UNK    |
| No  | No  | Complete | 170.8  | 81.8  | 28.04 UNK   |
| No  | No  | Complete | 157.5  | 60.1  | 24.23 UNK   |
| No  | Yes | Complete | 172.72 | 99    | 33.19 UNK   |
| No  | No  | Complete | 177.8  | 65.9  | 20.85 UNK   |
| Yes | Yes | Complete | 157.48 | 75    | 30.24 UNK   |
| No  | No  | Complete | 160.02 | 73.6  | 28.74 UNK   |
| No  | No  | Complete | 170.1  | 109   | 37.67 UNK   |
| No  | No  | Complete | 168    | 61.8  | 21.9 UNK    |

|    |     |          |        |       |             |
|----|-----|----------|--------|-------|-------------|
| No | No  | Complete | 165.1  | 75    | 27.51 UNK   |
| No | No  | Complete | 175.2  | 95.4  | 31.08 UNK   |
| No | No  | Complete | 188.9  | 95    | 26.62 UNK   |
| No | No  | Complete | 172.72 | 77.2  | 25.88 UNK   |
| No | No  | Complete | 170.1  | 72.2  | 24.95 UNK   |
| No | No  | Complete | 167.6  | 74.8  | 26.63 O POS |
| No | Yes | Complete | 193    | 92.7  | 24.89 A POS |
| No | No  | Complete | 172.7  | 117.8 | 39.5 UNK    |
| No | No  | Complete | 162.5  | 87.5  | 33.14 UNK   |
| No | No  | Complete | 160    | 60    | 23.44 UNK   |
| No | No  | Complete | 157.5  | 45    | 18.14 UNK   |
| No | No  | Complete | 162.6  | 86    | 32.53 UNK   |
| No | No  | Complete | 172.7  | 90.8  | 30.44 UNK   |
| No | Yes | Complete | 179    | 90    | 28.09 UNK   |
| No | No  | Complete | 161.5  | 72.7  | 27.87 UNK   |
| No | No  | Complete | 173.7  | 75    | 24.86 UNK   |
| No | Yes | Complete | 165.1  | 63.8  | 23.41 UNK   |
| No | Yes | Complete | 154.9  | 51.8  | 21.59 UNK   |
| No | No  | Complete | 175.2  | 95.4  | 31.08 UNK   |
| No | Yes | Complete | 189    | 95.4  | 26.71 UNK   |
| No | Yes | Complete | 176.5  | 60.8  | 19.52 UNK   |
| No | No  | Complete | 165.1  | 109   | 39.99 A POS |
| No | No  | Complete | 167.6  | 115.1 | 40.98 A POS |
| No | Yes | Complete | 162.5  | 50.9  | 19.28 UNK   |
| No | No  | Complete | 162.5  | 54.5  | 20.64 A POS |
| No | No  | Complete | 175.2  | 79.3  | 25.83 UNK   |
| No | No  | Complete | 175.2  | 65.9  | 21.47 UNK   |
| No | No  | Complete | 167    | 52    | 18.65 UNK   |
| No | No  | Complete | 152.4  | 60    | 25.83 UNK   |
| No | No  | Complete | 152.4  | 72.5  | 31.22 UNK   |
| No | Yes | Complete | 177.8  | 90.9  | 28.75 UNK   |
| No | No  | Complete | 162.5  | 65.9  | 24.96 UNK   |
| No | No  | Complete | 172.7  | 81.8  | 27.43 UNK   |
| No | No  | Complete | 158    | 56    | 22.43 UNK   |
| No | No  | Complete | 170.1  | 77.2  | 26.68 UNK   |
| No | No  | Complete | 162.5  | 78    | 29.54 UNK   |
| No | No  | Complete | 167.6  | 75.9  | 27.02 A POS |
| No | No  | Complete | 162.5  | 83    | 31.43 O POS |
| No | No  | Complete | 144.7  | 66.9  | 31.95 O POS |
| No | No  | Complete | 157.4  | 65.7  | 26.52 UNK   |
| No | Yes | Complete | 157.4  | 65.9  | 26.6 UNK    |
| No | Yes | Complete | 152.4  | 70.1  | 30.18 UNK   |
| No | Yes | Complete | 175.2  | 109   | 35.51 UNK   |
| No | No  | Complete | 162.5  | 122.7 | 46.47 UNK   |
| No | No  | Complete | 152.4  | 79    | 34.01 UNK   |

|    |     |          |        |       |              |
|----|-----|----------|--------|-------|--------------|
| No | No  | Complete | 155    | 74    | 30.8 UNK     |
| No | No  | Complete | 162    | 76    | 28.96 UNK    |
| No | No  | Complete | 180.3  | 97.5  | 29.99 O NEG  |
| No | Yes | Complete | 167.6  | 109   | 38.8 UNK     |
| No | Yes | Complete | 152.4  | 58.9  | 25.36 UNK    |
| No | No  | Complete | 144.7  | 49    | 23.4 UNK     |
| No | No  | Complete | 182    | 86.3  | 26.05 UNK    |
| No | Yes | Complete | 162.5  | 109   | 41.28 UNK    |
| No | No  | Complete | 175.2  | 79.3  | 25.83 UNK    |
| No | No  | Complete | 175.26 | 63.5  | 20.67 AB POS |
| No | No  | Complete | 175.2  | 64    | 20.85 AB POS |
| No | No  | Complete | 157.4  | 58.6  | 23.65 UNK    |
| No | No  | Complete | 172.7  | 76.3  | 25.58 O POS  |
| No | No  | Complete | 172.7  | 102.2 | 34.27 UNK    |
| No | No  | Complete | 167.6  | 89.8  | 31.97 O POS  |
| No | No  | Complete | 165.1  | 70    | 25.68 UNK    |
| No | No  | Complete | 157.4  | 136.3 | 55.02 UNK    |
| No | No  | Complete | 177    | 69    | 22 UNK       |
| No | No  | Complete | 175.2  | 72.7  | 23.68 B POS  |
| No | No  | Complete | 167.6  | 70.4  | 25.06 UNK    |
| No | No  | Complete | 182.8  | 103.6 | 31 UNK       |
| No | No  | Complete | 175    | 81.8  | 26.71 UNK    |
| No | No  | Complete | 177.8  | 97.7  | 30.91 UNK    |
| No | No  | Complete | 154.9  | 68.4  | 28.51 O POS  |
| No | No  | Complete | 170    | 81.8  | 28.3 UNK     |
| No | No  | Complete | 167.6  | 54.4  | 19.37 UNK    |
| No | No  | Complete | 157.4  | 90.9  | 36.69 A POS  |
| No | No  | Complete | 162    | 64    | 24.39 UNK    |
| No | No  | Complete | 167.6  | 102.7 | 36.56 UNK    |
| No | No  | Complete | 170    | 77.1  | 26.68 O POS  |
| No | No  | Complete | 177.8  | 68    | 21.51 UNK    |
| No | No  | Complete | 165.1  | 79.1  | 29.02 UNK    |
| No | No  | Complete | 174    | 62    | 20.48 B POS  |
| No | No  | Complete | 172.7  | 75    | 25.15 UNK    |
| No | No  | Complete | 167.6  | 68.1  | 24.24 B POS  |
| No | No  | Complete | 165.1  | 60.2  | 22.09 UNK    |
| NA | Yes | Complete | 182.8  | 85.9  | 25.71 UNK    |
| No | No  | Complete | 160    | 57.6  | 22.5 UNK     |
| No | Yes | Complete | 165.1  | 81.8  | 30.01 UNK    |
| No | No  | Complete | 167.6  | 83.9  | 29.87 UNK    |
| No | No  | Complete | 172.7  | 108.1 | 36.24 UNK    |
| No | No  | Complete | 180.3  | 127.2 | 39.13 UNK    |
| No | No  | Complete | 177.8  | 79.5  | 25.15 O POS  |
| No | No  | Complete | 154.9  | 56.2  | 23.42 UNK    |
| No | No  | Complete | 176    | 90    | 29.05 O POS  |

|     |     |          |       |       |             |
|-----|-----|----------|-------|-------|-------------|
| No  | No  | Complete | 160   | 68.1  | 26.6 UNK    |
| No  | No  | Complete | 165.1 | 72.2  | 26.49 A POS |
| No  | No  | Complete | 134.6 | 54.4  | 30.03 UNK   |
| No  | No  | Complete | 172.7 | 81.6  | 27.36 UNK   |
| No  | No  | Complete | 177.8 | 73.9  | 23.38 UNK   |
| No  | No  | Complete | 187.9 | 111   | 31.44 UNK   |
| No  | Yes | Complete | 172.7 | 79.5  | 26.66 UNK   |
| No  | Yes | Complete | 182.8 | 100   | 29.93 UNK   |
| No  | No  | Complete | 165.1 | 108.1 | 39.66 A NEG |
| No  | No  | Complete | 149.8 | 40.9  | 18.23 UNK   |
| No  | No  | Complete | 193   | 134   | 35.97 UNK   |
| No  | No  | Complete | 177.8 | 82.2  | 26 O POS    |
| Yes | Yes | Complete | 165   | 84    | 30.85 UNK   |
| No  | Yes | Complete | 182.8 | 98.1  | 29.36 UNK   |
| No  | No  | Complete | 170.1 | 63.6  | 21.98 UNK   |
| No  | No  | Complete | 152.4 | 51    | 21.96 A POS |
| No  | Yes | Complete | 175.3 | 77.3  | 25.15 O POS |
| No  | No  | Complete | 175.3 | 72.7  | 23.66 O POS |
| No  | No  | Complete | 152.4 | 40.8  | 17.57 UNK   |
| No  | Yes | Complete | 172.7 | 95.5  | 32.02 UNK   |
| No  | No  | Complete | 149.9 | 43.1  | 19.18 UNK   |
| No  | No  | Complete | 147.5 | 57    | 26.2 UNK    |
| No  | No  | Complete | 160   | 56.7  | 22.15 B POS |
| No  | No  | Complete | 180.3 | 109.1 | 33.56 UNK   |
| No  | No  | Complete | 177.8 | 220   | 69.6 UNK    |
| No  | No  | Complete | 170.2 | 100   | 34.52 UNK   |
| No  | No  | Complete | 180   | 63.5  | 19.6 UNK    |
| No  | Yes | Complete | 157.4 | 56.4  | 22.77 UNK   |
| No  | No  | Complete | 157.5 | 59.1  | 23.82 UNK   |
| No  | No  | Complete | 162.5 | 68.2  | 25.83 O POS |
| No  | No  | Complete | 161.5 | 66.4  | 25.46 O POS |
| No  | Yes | Complete | 160   | 68    | 26.56 UNK   |
| No  | No  | Complete | 157.5 | 84.1  | 33.9 UNK    |
| No  | No  | Complete | 165   | 64    | 23.51 O POS |
| No  | No  | Complete | 158   | 80.2  | 32.13 UNK   |
| No  | Yes | Complete | 182.9 | 134.1 | 40.09 UNK   |
| No  | No  | Complete | 172.7 | 100   | 33.53 UNK   |
| No  | No  | Complete | 183   | 75    | 22.4 O NEG  |
| No  | No  | Complete | 193   | 113.6 | 30.5 UNK    |
| No  | No  | Complete | 177.8 | 60.7  | 19.2 UNK    |
| No  | No  | Complete | 175.2 | 63.6  | 20.72 UNK   |
| No  | No  | Complete | 182.9 | 117   | 34.98 UNK   |
| No  | Yes | Complete | 180   | 95.5  | 29.48 UNK   |
| No  | No  | Complete | 167.6 | 78.1  | 27.8 UNK    |
| No  | No  | Complete | 195   | 105.6 | 27.77 O POS |

|    |     |          |        |       |             |
|----|-----|----------|--------|-------|-------------|
| No | No  | Complete | 167.6  | 67.7  | 24.1 B POS  |
| No | No  | Complete | 172.7  | 85.4  | 28.63 O POS |
| No | No  | Complete | 157.5  | 68.2  | 27.49 UNK   |
| No | No  | Complete | 152.4  | 60    | 25.83 UNK   |
| No | No  | Complete | 165.1  | 50    | 18.34 B NEG |
| No | Yes | Complete | 167.6  | 65.9  | 23.46 UNK   |
| No | Yes | Complete | 176.8  | 60.2  | 19.26 UNK   |
| No | No  | Complete | 147.3  | 91.3  | 42.08 UNK   |
| No | Yes | Complete | 180.3  | 80.6  | 24.79 UNK   |
| No | No  | Complete | 165.1  | 100   | 36.69 UNK   |
| No | No  | Complete | 157.5  | 75    | 30.23 UNK   |
| No | Yes | Complete | 155    | 56.7  | 23.6 UNK    |
| No | Yes | Complete | 165.1  | 75    | 27.51 UNK   |
| No | No  | Complete | 160    | 72.7  | 28.4 UNK    |
| No | No  | Complete | 162.6  | 54.4  | 20.58 UNK   |
| No | No  | Complete | 165.1  | 102.3 | 37.53 O POS |
| No | Yes | Complete | 160    | 77.1  | 30.12 UNK   |
| No | No  | Complete | 165.1  | 75    | 27.51 UNK   |
| No | No  | Complete | 152    | 77.3  | 33.46 O POS |
| No | No  | Complete | 167.6  | 65.9  | 23.46 UNK   |
| No | No  | Complete | 210.8  | 86.4  | 19.44 UNK   |
| No | No  | Complete | 180.3  | 74.6  | 22.95 A POS |
| No | Yes | Complete | 162.6  | 79.6  | 30.11 O POS |
| No | No  | Complete | 162.6  | 79.6  | 30.11 O POS |
| No | No  | Complete | 157.5  | 52.2  | 21.04 UNK   |
| No | No  | Complete | 158.8  | 98    | 38.86 O POS |
| No | Yes | Complete | 167.6  | 81    | 28.84 A POS |
| No | No  | Complete | 175.3  | 79.1  | 25.74 UNK   |
| No | No  | Complete | 177.8  | 88.6  | 28.03 UNK   |
| No | Yes | Complete | 158    | 65    | 26.04 UNK   |
| No | Yes | Complete | 157.5  | 95.5  | 38.5 UNK    |
| No | Yes | Complete | 172.7  | 77.3  | 25.92 UNK   |
| No | Yes | Complete | 175.3  | 83    | 27.01 UNK   |
| No | Yes | Complete | 170.69 | 80.8  | 27.73 A NEG |
| No | No  | Complete | 175.3  | 86.4  | 28.12 B POS |
| No | No  | Complete | 162.6  | 41.2  | 15.58 A POS |
| No | No  | Complete | 147.3  | 54.6  | 25.16 A POS |
| No | No  | Complete | 164.6  | 77.3  | 28.53 A POS |
| No | Yes | Complete | 177.8  | 68.2  | 21.57 A POS |
| No | No  | Complete | 188    | 81.8  | 23.14 UNK   |
| No | Yes | Complete | 167.6  | 78.2  | 27.84 UNK   |
| No | No  | Complete | 172.7  | 85.5  | 28.67 UNK   |
| No | No  | Complete | 170.2  | 75    | 25.89 UNK   |
| No | No  | Complete | 170.2  | 68.2  | 23.54 UNK   |
| No | No  | Complete | 175    | 95    | 31.02 UNK   |



|    |     |          |        |        |              |
|----|-----|----------|--------|--------|--------------|
| No | No  | Complete | 162.6  | 74.8   | 28.29 O POS  |
| No | No  | Complete | 170.2  | 113.6  | 39.22 UNK    |
| No | No  | Complete | 164    | 74.5   | 27.7 O POS   |
| No | No  | Complete | 164    | 77.3   | 28.74 O POS  |
| No | No  | Complete | 167.6  | 77.3   | 27.52 UNK    |
| No | No  | Complete | 170    | 68.2   | 23.6 UNK     |
| No | Yes | Complete | 160    | 84.1   | 32.85 UNK    |
| No | No  | Complete | 157.5  | 84.1   | 33.9 UNK     |
| No | Yes | Complete | 167    | 87     | 31.2 A POS   |
| No | No  | Complete | 167.6  | 72.6   | 25.85 UNK    |
| No | Yes | Complete | 160    | 81     | 31.64 O POS  |
| No | No  | Complete | 164.4  | 68.6   | 25.38 UNK    |
| No | No  | Complete | 167.6  | 113.6  | 40.44 UNK    |
| No | No  | Complete | 167.6  | 81.8   | 29.12 UNK    |
| No | No  | Complete | 177.8  | 86.4   | 27.33 A POS  |
| No | No  | Complete | 170.2  | 79.6   | 27.48 UNK    |
| No | No  | Complete | 170.2  | 86.4   | 29.83 A POS  |
| No | No  | Complete | 185.4  | 102.7  | 29.88 AB Pos |
| No | No  | Complete | 165.1  | 95.3   | 34.96 UNK    |
| No | Yes | Complete | 185.4  | 119.9  | 34.88 UNK    |
| No | No  | Complete | 167.6  | 81.6   | 29.05 UNK    |
| No | Yes | Complete | 152.4  | 122.7  | 52.83 B POS  |
| No | No  | Complete | 172.7  | 111.36 | 37.3 UNK     |
| No | No  | Complete | 165.1  | 59.1   | 21.68 UNK    |
| No | No  | Complete | 172.7  | 79.6   | 26.69 UNK    |
| No | Yes | Complete | 177.8  | 100    | 31.63 UNK    |
| No | No  | Complete | 165.1  | 108.9  | 39.95 UNK    |
| No | No  | Complete | 165.1  | 79.4   | 29.13 UNK    |
| No | No  | Complete | 170    | 104.5  | 36.16 UNK    |
| No | No  | Complete | 170.2  | 61.2   | 21.13 B POS  |
| No | No  | Complete | 187.9  | 101.6  | 28.78 UNK    |
| No | No  | Complete | 170.1  | 111.3  | 38.47 UNK    |
| No | No  | Complete | 172.7  | 104.6  | 35.07 UNK    |
| No | Yes | Complete | 171.4  | 104    | 35.4 O POS   |
| No | No  | Complete | 152.4  | 81.8   | 35.22 UNK    |
| No | No  | Complete | 175.2  | 86.3   | 28.12 UNK    |
| No | No  | Complete | 173.74 | 74.2   | 24.58 O POS  |
| No | No  | Complete | 165.1  | 81.9   | 30.05 UNK    |
| No | Yes | Complete | 150    | 50     | 22.22 O POS  |
| No | No  | Complete | 175.26 | 81.8   | 26.63 UNK    |
| No | No  | Complete | 167.6  | 98.9   | 35.21 UNK    |
| No | No  | Complete | 172.7  | 68.2   | 22.87 UNK    |
| No | No  | Complete | 157.5  | 86.9   | 35.03 A POS  |
| No | No  | Complete | 165    | 65.9   | 24.21 UNK    |
| No | No  | Complete | 170.18 | 80.5   | 27.8 UNK     |

|    |     |          |        |       |             |
|----|-----|----------|--------|-------|-------------|
| No | No  | Complete | 150    | 99.8  | 44.36 UNK   |
| No | No  | Complete | 178    | 90.9  | 28.69 UNK   |
| No | No  | Complete | 178    | 81.8  | 25.82 UNK   |
| No | No  | Complete | 175.3  | 81.8  | 26.62 UNK   |
| No | No  | Complete | 155    | 61.4  | 25.56 UNK   |
| No | No  | Complete | 162.6  | 52.2  | 19.74 UNK   |
| No | No  | Complete | 155    | 70.5  | 29.34 UNK   |
| No | Yes | Complete | 178    | 62.5  | 19.73 A POS |
| No | No  | Complete | 167.6  | 54.5  | 19.4 UNK    |
| No | No  | Complete | 167.6  | 60    | 21.36 UNK   |
| No | No  | Complete | 165    | 77.2  | 28.36 B POS |
| No | Yes | Complete | 167.6  | 81.8  | 29.12 UNK   |
| No | No  | Complete | 187.9  | 97.7  | 27.67 UNK   |
| No | No  | Complete | 172.7  | 105   | 35.21 O POS |
| No | No  | Complete | 188    | 85    | 24.05 UNK   |
| No | No  | Complete | 152.4  | 62.8  | 27.04 B POS |
| No | No  | Complete | 168    | 100   | 35.43 UNK   |
| No | No  | Complete | 175.3  | 63.5  | 20.66 UNK   |
| No | No  | Complete | 175.3  | 86.6  | 28.18 UNK   |
| No | No  | Complete | 182.9  | 70.5  | 21.07 UNK   |
| No | No  | Complete | 154.9  | 51.8  | 21.59 UNK   |
| No | No  | Complete | 172.7  | 77.3  | 25.92 O POS |
| No | No  | Complete | 165    | 79.6  | 29.24 UNK   |
| No | No  | Complete | 152.4  | 76.2  | 32.81 UNK   |
| No | No  | Complete | 170.2  | 84.1  | 29.03 UNK   |
| No | No  | Complete | 165.1  | 100   | 36.69 O POS |
| No | No  | Complete | 165.1  | 59.1  | 21.68 UNK   |
| No | No  | Complete | 165.1  | 59.1  | 21.68 UNK   |
| No | No  | Complete | 170    | 104.6 | 36.19 UNK   |
| No | No  | Complete | 177.8  | 72.6  | 22.97 UNK   |
| No | No  | Complete | 167.6  | 84.1  | 29.94 A POS |
| No | No  | Complete | 162.5  | 81.8  | 30.98 UNK   |
| No | No  | Complete | 170.67 | 163.6 | 56.17 O POS |
| No | No  | Complete | 157.48 | 79.4  | 32.02 B POS |
| No | No  | Complete | 157.48 | 79.4  | 32.02 B POS |
| No | No  | Complete | 152.4  | 59.1  | 25.45 O POS |
| No | No  | Complete | 165.1  | 104.6 | 38.37 UNK   |
| No | No  | Complete | 167    | 118.2 | 42.38 UNK   |
| No | No  | Complete | 167.64 | 65.9  | 23.45 UNK   |
| No | No  | Complete | 165.1  | 86.7  | 31.81 UNK   |
| No | No  | Complete | 182.88 | 83.2  | 24.88 UNK   |
| No | No  | Complete | 187.96 | 81.8  | 23.15 UNK   |
| No | No  | Complete | 185.42 | 81.7  | 23.76 UNK   |
| No | No  | Complete | 152.4  | 59.1  | 25.45 UNK   |
| No | No  | Complete | 167.64 | 55.9  | 19.89 UNK   |

|    |     |          |        |       |             |
|----|-----|----------|--------|-------|-------------|
| No | No  | Complete | 175.26 | 70.5  | 22.95 UNK   |
| No | No  | Complete | 165    | 59.1  | 21.71 UNK   |
| No | No  | Complete | 175    | 87.5  | 28.57 UNK   |
| No | No  | Complete | 162.56 | 65.8  | 24.9 O POS  |
| No | Yes | Complete | 172.72 | 60.4  | 20.25 UNK   |
| No | No  | Complete | 180.34 | 85.9  | 26.41 UNK   |
| No | No  | Complete | 180.34 | 76.4  | 23.49 UNK   |
| No | No  | Complete | 180.34 | 79.4  | 24.41 UNK   |
| No | No  | Complete | 165    | 68.2  | 25.05 UNK   |
| No | No  | Complete | 160.02 | 95.5  | 37.3 UNK    |
| No | No  | Complete | 152    | 84    | 36.36 UNK   |
| No | No  | Complete | 167.64 | 109.1 | 38.82 UNK   |
| No | No  | Complete | 172.72 | 78.8  | 26.41 O POS |
| No | No  | Complete | 170.18 | 72.7  | 25.1 UNK    |
| No | No  | Complete | 152.4  | 77.3  | 33.28 UNK   |
| No | No  | Complete | 165.1  | 90.9  | 33.35 UNK   |
| No | No  | Complete | 177.8  | 72.6  | 22.97 UNK   |
| No | No  | Complete | 152.4  | 73.9  | 31.8 UNK    |
| No | No  | Complete | 175.26 | 109.1 | 35.52 UNK   |
| No | No  | Complete | 167.6  | 79.6  | 28.34 UNK   |
| No | No  | Complete | 165.1  | 58.6  | 21.5 UNK    |
| No | No  | Complete | 167.64 | 77.3  | 27.51 UNK   |
| No | No  | Complete | 175.26 | 100   | 32.56 UNK   |
| No | No  | Complete | 172.72 | 81.8  | 27.42 UNK   |
| No | No  | Complete | 172.7  | 109.1 | 36.58 UNK   |
| No | No  | Complete | 172.72 | 109.1 | 36.57 UNK   |
| No | No  | Complete | 152.4  | 42.7  | 18.38 UNK   |
| No | No  | Complete | 167.6  | 81    | 28.84 O POS |
| No | No  | Complete | 152.4  | 43.7  | 18.82 UNK   |
| NA | NA  | Complete | 162.6  | 68.1  | 25.76 UNK   |
| No | No  | Complete | 167.64 | 81.8  | 29.11 UNK   |
| No | No  | Complete | 175.3  | 90.9  | 29.58 UNK   |
| No | No  | Complete | 170.2  | 79.6  | 27.48 UNK   |
| No | No  | Complete | 155    | 81    | 33.71 UNK   |
| No | No  | Complete | 167.1  | 200   | 71.63 UNK   |
| No | No  | Complete | 162.5  | 61.4  | 23.25 UNK   |
| No | No  | Complete | 157.5  | 50    | 20.16 UNK   |
| No | No  | Complete | 173.9  | 104.6 | 34.59 UNK   |
| No | No  | Complete | 167.64 | 65    | 23.13 UNK   |
| No | No  | Complete | 167.64 | 77.3  | 27.51 UNK   |
| No | No  | Complete | 182.9  | 54.4  | 16.26 UNK   |
| No | No  | Complete | 157.5  | 63.2  | 25.48 UNK   |
| No | No  | Complete | 154.9  | 49.9  | 20.8 UNK    |
| No | No  | Complete | 182.8  | 106.6 | 31.9 UNK    |
| No | No  | Complete | 157    | 68    | 27.59 UNK   |

|    |     |          |        |       |             |
|----|-----|----------|--------|-------|-------------|
| No | No  | Complete | 175.26 | 72.7  | 23.67 UNK   |
| No | No  | Complete | 177.8  | 84.1  | 26.6 UNK    |
| No | No  | Complete | 162.6  | 91    | 34.42 UNK   |
| No | No  | Complete | 183    | 85    | 25.38 A POS |
| No | No  | Complete | 167.6  | 82    | 29.19 A POS |
| No | No  | Complete | 170.1  | 77.3  | 26.72 UNK   |
| No | No  | Complete | 165    | 80.3  | 29.49 UNK   |
| No | No  | Complete | 150    | 72.7  | 32.31 UNK   |
| No | No  | Complete | 168    | 61.4  | 21.75 UNK   |
| No | No  | Complete | 157.5  | 54.6  | 22.01 UNK   |
| No | No  | Complete | 175.3  | 82.6  | 26.88 O POS |
| No | No  | Complete | 149.8  | 58    | 25.85 UNK   |
| No | No  | Complete | 154.9  | 54.4  | 22.67 O POS |
| No | No  | Complete | 162.5  | 54.5  | 20.64 UNK   |
| No | Yes | Complete | 175.2  | 129.2 | 42.09 UNK   |
| No | Yes | Complete | 157    | 60    | 24.34 UNK   |
| No | No  | Complete | 175    | 80    | 26.12 UNK   |
| No | Yes | Complete | 162.5  | 131.8 | 49.91 UNK   |
| No | No  | Complete | 165    | 124.7 | 45.8 UNK    |
| No | No  | Complete | 170.1  | 86.3  | 29.83 UNK   |
| No | No  | Complete | 177.8  | 88.8  | 28.09 UNK   |
| No | No  | Complete | 182.8  | 129.5 | 38.75 UNK   |
| No | No  | Complete | 167.5  | 102   | 36.36 UNK   |
| No | No  | Complete | 157.8  | 65.7  | 26.38 A POS |
| No | No  | Complete | 181.4  | 81    | 24.62 UNK   |
| No | No  | Complete | 177.8  | 71.8  | 22.71 UNK   |
| No | No  | Complete | 124.9  | 50.9  | 32.63 UNK   |
| No | No  | Complete | 185    | 90    | 26.3 B POS  |
| No | No  | Complete | 164.5  | 90.9  | 33.59 UNK   |
| No | No  | Complete | 161.2  | 77    | 29.63 UNK   |
| No | No  | Complete | 165.1  | 79.3  | 29.09 UNK   |
| No | No  | Complete | 165.1  | 94.3  | 34.6 UNK    |
| No | Yes | Complete | 160    | 70.4  | 27.5 UNK    |
| No | NA  | Complete | 165.1  | 93.6  | 34.34 UNK   |
| No | No  | Complete | 153    | 61    | 26.06 UNK   |
| No | No  | Complete | 172.2  | 81.6  | 27.52 UNK   |
| No | No  | Complete | 165.1  | 70    | 25.68 O POS |
| No | No  | Complete | 152.4  | 68.2  | 29.36 UNK   |
| No | No  | Complete | 163.8  | 63    | 23.48 O POS |
| No | No  | Complete | 160.02 | 72.6  | 28.35 O POS |
| No | No  | Complete | 168    | 81.7  | 28.95 UNK   |
| No | No  | Complete | 170.7  | 90.9  | 31.2 UNK    |
| No | No  | Complete | 167.6  | 76.8  | 27.34 UNK   |
| No | No  | Complete | 157    | 59    | 23.94 UNK   |
| No | No  | Complete | 173    | 95.5  | 31.91 A POS |

|    |     |          |        |       |             |
|----|-----|----------|--------|-------|-------------|
| No | No  | Complete | 175.26 | 97.5  | 31.74 UNK   |
| No | No  | Complete | 165.1  | 100   | 36.69 UNK   |
| No | No  | Complete | 170.18 | 100   | 34.53 UNK   |
| No | No  | Complete | 167.64 | 57.3  | 20.39 UNK   |
| No | No  | Complete | 185    | 95.5  | 27.9 UNK    |
| No | No  | Complete | 152.4  | 44.6  | 19.2 AB POS |
| No | No  | Complete | 175.3  | 86.2  | 28.05 UNK   |
| No | Yes | Complete | 180    | 79.5  | 24.54 UNK   |
| No | No  | Complete | 180    | 79.5  | 24.54 UNK   |
| No | No  | Complete | 180.3  | 97.6  | 30.02 UNK   |
| No | No  | Complete | 158.4  | 63.5  | 25.31 UNK   |
| No | No  | Complete | 165.1  | 56.8  | 20.84 UNK   |
| No | No  | Complete | 162.56 | 77.1  | 29.18 UNK   |
| No | No  | Complete | 160    | 60.2  | 23.52 UNK   |
| No | Yes | Complete | 165.1  | 84    | 30.82 O POS |
| No | No  | Complete | 175.26 | 104.6 | 34.05 UNK   |
| No | No  | Complete | 152.4  | 62    | 26.69 UNK   |
| No | Yes | Complete | 170.18 | 73.1  | 25.24 O POS |
| No | No  | Complete | 175.2  | 90    | 29.32 UNK   |
| No | No  | Complete | 170    | 84.1  | 29.1 O POS  |
| No | No  | Complete | 160    | 60.7  | 23.71 A POS |
| No | No  | Complete | 150    | 68.1  | 30.27 UNK   |
| No | No  | Complete | 167.6  | 109.1 | 38.84 UNK   |
| No | No  | Complete | 177.8  | 75    | 23.72 A POS |
| No | No  | Complete | 178    | 95    | 29.98 UNK   |
| No | No  | Complete | 177.8  | 88.6  | 28.03 A POS |
| No | No  | Complete | 182.9  | 97.5  | 29.15 UNK   |
| No | No  | Complete | 160    | 65.9  | 25.74 UNK   |
| No | No  | Complete | 163    | 62.5  | 23.52 O POS |
| No | No  | Complete | 154.9  | 47.7  | 19.88 UNK   |
| No | No  | Complete | 167.6  | 81.8  | 29.12 UNK   |
| No | Yes | Complete | 162.5  | 72.7  | 27.53 UNK   |
| No | No  | Complete | 172.7  | 97.7  | 32.76 UNK   |
| No | No  | Complete | 152.4  | 76.3  | 32.85 UNK   |
| No | No  | Complete | 160    | 56    | 21.88 UNK   |
| No | No  | Complete | 157.4  | 81.3  | 32.82 UNK   |
| No | No  | Complete | 175.26 | 72.7  | 23.67 UNK   |
| No | No  | Complete | 162.56 | 77.3  | 29.25 UNK   |
| No | No  | Complete | 152    | 60.9  | 26.36 UNK   |
| No | Yes | Complete | 157.4  | 72.7  | 29.34 O POS |
| No | No  | Complete | 170.18 | 104.3 | 36.01 UNK   |
| No | No  | Complete | 152.4  | 81.8  | 35.22 UNK   |
| No | No  | Complete | 155.45 | 89.5  | 37.04 A POS |
| No | No  | Complete | 152.4  | 63.6  | 27.38 A NEG |
| No | No  | Complete | 165.1  | 90    | 33.02 UNK   |

|     |     |          |        |       |             |
|-----|-----|----------|--------|-------|-------------|
| No  | No  | Complete | 162.56 | 118.2 | 44.73 UNK   |
| No  | No  | Complete | 162    | 65    | 24.77 UNK   |
| No  | No  | Complete | 162.6  | 118.2 | 44.71 UNK   |
| No  | No  | Complete | 171    | 72.2  | 24.69 UNK   |
| No  | No  | Complete | 165    | 70    | 25.71 UNK   |
| No  | No  | Complete | 175.26 | 86.4  | 28.13 UNK   |
| No  | Yes | Complete | 149.86 | 90.7  | 40.39 A POS |
| No  | No  | Complete | 151    | 68    | 29.82 UNK   |
| No  | No  | Complete | 172.7  | 100   | 33.53 UNK   |
| No  | No  | Complete | 165.1  | 68.2  | 25.02 O POS |
| No  | No  | Complete | 180.34 | 90.8  | 27.92 O POS |
| No  | No  | Complete | 162.56 | 68.2  | 25.81 UNK   |
| No  | No  | Complete | 167.6  | 63.5  | 22.61 UNK   |
| No  | No  | Complete | 167    | 76    | 27.25 UNK   |
| No  | No  | Complete | 167.64 | 75    | 26.69 UNK   |
| No  | No  | Complete | 162.56 | 68.7  | 26 UNK      |
| No  | No  | Complete | 170    | 102   | 35.29 UNK   |
| No  | No  | Complete | 177.8  | 83.2  | 26.32 UNK   |
| Yes | Yes | Complete | 185.4  | 87.6  | 25.49 A POS |
| No  | No  | Complete | 152.4  | 75    | 32.29 A POS |
| No  | No  | Complete | 167    | 118.2 | 42.38 B POS |
| No  | No  | Complete | 172.7  | 117.8 | 39.5 UNK    |
| No  | No  | Complete | 163    | 77    | 28.98 UNK   |
| No  | No  | Complete | 157.48 | 50.8  | 20.48 UNK   |
| No  | No  | Complete | 185    | 105.9 | 30.94 O POS |
| No  | No  | Complete | 190.5  | 117.7 | 32.43 UNK   |
| No  | Yes | Complete | 187.96 | 109.1 | 30.88 UNK   |
| No  | Yes | Complete | 167.5  | 88.6  | 31.58 UNK   |
| No  | No  | Complete | 203.2  | 81.8  | 19.81 UNK   |
| No  | No  | Complete | 162.56 | 64.6  | 24.45 UNK   |
| No  | No  | Complete | 162.56 | 65.9  | 24.94 O POS |
| No  | No  | Complete | 178    | 90.7  | 28.63 UNK   |
| No  | No  | Complete | 172.7  | 136.1 | 45.63 UNK   |
| No  | No  | Complete | 177.8  | 81.6  | 25.81 O POS |
| No  | Yes | Complete | 165.1  | 66.7  | 24.47 UNK   |
| No  | No  | Complete | 168    | 75.1  | 26.61 UNK   |
| No  | Yes | Complete | 165    | 74.6  | 27.4 UNK    |
| No  | Yes | Complete | 167.6  | 75    | 26.7 UNK    |
| No  | No  | Complete | 177.8  | 68    | 21.51 A POS |
| No  | No  | Complete | 203.2  | 145.2 | 35.17 O POS |
| No  | No  | Complete | 157.48 | 61.4  | 24.76 O POS |
| No  | No  | Complete | 162.6  | 68    | 25.72 UNK   |
| No  | Yes | Complete | 157.5  | 59.1  | 23.82 UNK   |
| No  | No  | Complete | 157    | 59    | 23.94 B POS |
| No  | No  | Complete | 163    | 91    | 34.25 UNK   |

|    |     |          |       |       |             |
|----|-----|----------|-------|-------|-------------|
| No | Yes | Complete | 124.5 | 75    | 48.39 UNK   |
| No | No  | Complete | 182.9 | 90.7  | 27.11 UNK   |
| No | No  | Complete | 162   | 90    | 34.29 O POS |
| No | No  | Complete | 177.8 | 90    | 28.47 UNK   |
| No | No  | Complete | 160   | 72.7  | 28.4 UNK    |
| No | No  | Complete | 175.3 | 90.9  | 29.58 UNK   |
| No | No  | Complete | 162.6 | 79.2  | 29.96 UNK   |
| No | No  | Complete | 157.5 | 70.5  | 28.42 UNK   |
| No | Yes | Complete | 180.3 | 79.6  | 24.49 UNK   |
| No | Yes | Complete | 167.6 | 61.3  | 21.82 UNK   |
| No | No  | Complete | 187.9 | 121.4 | 34.38 UNK   |
| No | No  | Complete | 167.6 | 77.3  | 27.52 UNK   |
| No | No  | Complete | 162.6 | 74.8  | 28.29 A POS |
| No | Yes | Complete | 185.4 | 165.9 | 48.26 UNK   |
| No | Yes | Complete | 172.7 | 75.5  | 25.31 A POS |
| No | No  | Complete | 170.2 | 86.4  | 29.83 A NEG |
| No | No  | Complete | 157.5 | 54.6  | 22.01 UNK   |
| No | Yes | Complete | 170.2 | 113.4 | 39.15 UNK   |
| No | No  | Complete | 180.3 | 82.3  | 25.32 A POS |
| No | No  | Complete | 180.3 | 93    | 28.61 UNK   |
| No | No  | Complete | 157.5 | 67.3  | 27.13 A POS |
| No | No  | Complete | 180   | 99.8  | 30.8 UNK    |
| No | No  | Complete | 165.1 | 91.6  | 33.6 UNK    |
| No | Yes | Complete | 188   | 124.7 | 35.28 UNK   |
| No | Yes | Complete | 162.6 | 84.1  | 31.81 A NEG |
| No | No  | Complete | 172.7 | 103.4 | 34.67 O POS |
| No | No  | Complete | 180.3 | 104   | 31.99 UNK   |
| No | Yes | Complete | 182.9 | 136.4 | 40.77 UNK   |
| No | No  | Complete | 165.1 | 68.2  | 25.02 UNK   |
| No | No  | Complete | 162.6 | 72.7  | 27.5 UNK    |
| No | Yes | Complete | 162.6 | 52.3  | 19.78 UNK   |
| No | No  | Complete | 170.2 | 61.8  | 21.33 UNK   |
| No | Yes | Complete | 160   | 79.6  | 31.09 UNK   |
| No | Yes | Complete | 160   | 65.8  | 25.7 UNK    |
| No | No  | Complete | 160   | 74    | 28.91 O POS |
| No | No  | Complete | 167.6 | 74.3  | 26.45 UNK   |
| No | No  | Complete | 162   | 75    | 28.58 UNK   |
| No | No  | Complete | 155   | 82    | 34.13 UNK   |
| No | Yes | Complete | 167.6 | 104.6 | 37.24 UNK   |
| No | Yes | Complete | 164.2 | 74.8  | 27.74 UNK   |
| No | No  | Complete | 151   | 69    | 30.26 UNK   |
| No | No  | Complete | 177   | 82.3  | 26.27 O POS |
| No | Yes | Complete | 149.9 | 77.3  | 34.4 UNK    |
| No | Yes | Complete | 165   | 56.4  | 20.72 UNK   |
| No | No  | Complete | 170.2 | 77.1  | 26.62 B POS |

|    |     |          |       |       |             |
|----|-----|----------|-------|-------|-------------|
| No | Yes | Complete | 175   | 73    | 23.84 UNK   |
| No | No  | Complete | 162.6 | 61.7  | 23.34 A POS |
| No | Yes | Complete | 172.7 | 84.1  | 28.2 UNK    |
| No | Yes | Complete | 170.2 | 71.8  | 24.79 UNK   |
| No | Yes | Complete | 165.1 | 77.3  | 28.36 UNK   |
| No | No  | Complete | 160   | 50    | 19.53 UNK   |
| No | No  | Complete | 156.2 | 56    | 22.95 UNK   |
| No | Yes | Complete | 167.6 | 111.4 | 39.66 UNK   |
| No | No  | Complete | 175.3 | 95.5  | 31.08 UNK   |
| No | Yes | Complete | 164.6 | 68.2  | 25.17 UNK   |
| No | Yes | Complete | 175.3 | 86.2  | 28.05 UNK   |
| No | No  | Complete | 180.3 | 118.2 | 36.36 UNK   |
| No | No  | Complete | 180   | 113.6 | 35.06 UNK   |
| No | No  | Complete | 154.9 | 90.7  | 37.8 O POS  |
| No | No  | Complete | 180   | 90.7  | 27.99 UNK   |
| No | No  | Complete | 162   | 72    | 27.43 B POS |
| No | No  | Complete | 157.5 | 61.4  | 24.75 UNK   |
| No | No  | Complete | 170.2 | 81.8  | 28.24 UNK   |
| No | No  | Complete | 167.6 | 87    | 30.97 UNK   |
| No | No  | Complete | 175.3 | 90.9  | 29.58 UNK   |
| No | No  | Complete | 162.6 | 80.3  | 30.37 O POS |
| No | No  | Complete | 162.6 | 109.1 | 41.27 UNK   |
| No | Yes | Complete | 169.2 | 79    | 27.59 UNK   |
| No | No  | Complete | 170.2 | 59    | 20.37 UNK   |
| No | No  | Complete | 172.7 | 100   | 33.53 O POS |
| No | No  | Complete | 164   | 81.8  | 30.41 UNK   |
| No | No  | Complete | 167.6 | 83.2  | 29.62 UNK   |
| No | No  | Complete | 152.4 | 65.9  | 28.37 UNK   |
| No | No  | Complete | 167.6 | 72.7  | 25.88 O POS |
| No | Yes | Complete | 157.5 | 92.7  | 37.37 UNK   |
| No | No  | Complete | 167.6 | 145.9 | 51.94 UNK   |
| No | Yes | Complete | 170.2 | 70    | 24.16 UNK   |
| No | No  | Complete | 160   | 84.8  | 33.13 UNK   |
| No | No  | Complete | 161.5 | 63.5  | 24.35 A POS |
| No | Yes | Complete | 172.7 | 70.5  | 23.64 B POS |
| No | No  | Complete | 167.6 | 89.4  | 31.83 B POS |
| No | Yes | Complete | 166.3 | 95    | 34.35 UNK   |
| No | No  | Complete | 167.6 | 47.7  | 16.98 UNK   |
| No | Yes | Complete | 182.9 | 81.8  | 24.45 UNK   |
| No | No  | Complete | 185   | 81.6  | 23.84 UNK   |
| No | No  | Complete | 185.4 | 81.8  | 23.8 UNK    |
| No | No  | Complete | 170.2 | 113.6 | 39.22 UNK   |
| No | No  | Complete | 170.7 | 127   | 43.58 UNK   |
| No | No  | Complete | 180.3 | 86.4  | 26.58 O NEG |
| No | No  | Complete | 163   | 62.5  | 23.52 UNK   |



|     |     |          |       |       |             |
|-----|-----|----------|-------|-------|-------------|
| No  | No  | Complete | 180.3 | 82    | 25.22 UNK   |
| No  | Yes | Complete | 177.8 | 77.3  | 24.45 O POS |
| No  | No  | Complete | 164.5 | 58    | 21.43 UNK   |
| No  | No  | Complete | 182.9 | 159.1 | 47.56 UNK   |
| No  | No  | Complete | 160   | 61.4  | 23.98 UNK   |
| Yes | No  | Complete | 158.4 | 63.5  | 25.31 UNK   |
| No  | No  | Complete | 157.5 | 59.3  | 23.91 B POS |
| No  | Yes | Complete | 165.1 | 84.1  | 30.85 A POS |
| No  | No  | Complete | 160   | 77.3  | 30.2 UNK    |
| No  | No  | Complete | 175.3 | 77.1  | 25.09 B POS |
| No  | No  | Complete | 182.9 | 100   | 29.89 UNK   |
| No  | No  | Complete | 157.5 | 139.7 | 56.32 UNK   |
| No  | No  | Complete | 172.7 | 86.2  | 28.9 O POS  |
| No  | No  | Complete | 170.2 | 73.6  | 25.41 UNK   |
| No  | Yes | Complete | 172.7 | 78.2  | 26.22 UNK   |
| No  | No  | Complete | 162.6 | 65.9  | 24.93 O NEG |
| No  | Yes | Complete | 162.6 | 125   | 47.28 UNK   |
| No  | No  | Complete | 177   | 93.1  | 29.72 UNK   |
| No  | No  | Complete | 157.5 | 59.1  | 23.82 UNK   |
| No  | Yes | Complete | 177.8 | 106.8 | 33.78 UNK   |
| No  | No  | Complete | 175.3 | 79.6  | 25.9 UNK    |
| No  | No  | Complete | 177.8 | 90.7  | 28.69 UNK   |
| No  | No  | Complete | 162.5 | 77.2  | 29.24 UNK   |
| No  | Yes | Complete | 157.5 | 72.6  | 29.27 UNK   |
| No  | No  | Complete | 170   | 80    | 27.68 UNK   |
| No  | No  | Complete | 170   | 89.1  | 30.83 UNK   |
| No  | No  | Complete | 157.5 | 31.8  | 12.82 A POS |
| No  | No  | Complete | 177.8 | 65.2  | 20.62 B POS |
| No  | No  | Complete | 170.2 | 78.2  | 27 UNK      |
| No  | No  | Complete | 167.6 | 100   | 35.6 UNK    |
| No  | Yes | Complete | 154.9 | 68    | 28.34 O POS |
| No  | No  | Complete | 162.6 | 85.4  | 32.3 UNK    |
| No  | No  | Complete | 170.2 | 77.3  | 26.68 UNK   |
| No  | No  | Complete | 154   | 59.3  | 25 UNK      |
| No  | No  | Complete | 160   | 113.4 | 44.3 UNK    |
| No  | No  | Complete | 155   | 77.3  | 32.17 UNK   |
| No  | No  | Complete | 157.5 | 67.3  | 27.13 UNK   |
| No  | Yes | Complete | 175   | 77.3  | 25.24 UNK   |
| No  | No  | Complete | 157.5 | 81.8  | 32.98 UNK   |
| No  | Yes | Complete | 142.1 | 59    | 29.22 UNK   |
| No  | Yes | Complete | 157.5 | 63.6  | 25.64 UNK   |
| No  | No  | Complete | 167.4 | 75.9  | 27.09 O POS |
| No  | No  | Complete | 167.6 | 75.9  | 27.02 O POS |
| No  | No  | Complete | 162.6 | 72.7  | 27.5 UNK    |
| No  | Yes | Complete | 162.6 | 109.1 | 41.27 UNK   |

|    |     |          |       |       |             |
|----|-----|----------|-------|-------|-------------|
| No | Yes | Complete | 166.3 | 86    | 31.1 UNK    |
| No | Yes | Complete | 167.6 | 90    | 32.04 UNK   |
| No | No  | Complete | 175.3 | 79.6  | 25.9 UNK    |
| No | No  | Complete | 162.6 | 90.9  | 34.38 UNK   |
| No | No  | Complete | 152.4 | 44.1  | 18.99 UNK   |
| No | No  | Complete | 170.2 | 68.2  | 23.54 UNK   |
| No | No  | Complete | 177.8 | 72.7  | 23 UNK      |
| No | Yes | Complete | 156.2 | 94    | 38.53 A POS |
| No | Yes | Complete | 160   | 70.5  | 27.54 UNK   |
| No | Yes | Complete | 162.6 | 81.6  | 30.86 UNK   |
| No | Yes | Complete | 164.9 | 63.5  | 23.35 O POS |
| No | Yes | Complete | 175.3 | 84.1  | 27.37 UNK   |
| No | No  | Complete | 167.6 | 78.2  | 27.84 UNK   |
| No | No  | Complete | 168.8 | 122   | 42.82 UNK   |
| No | Yes | Complete | 185   | 74    | 21.62 UNK   |
| No | No  | Complete | 165.1 | 83.9  | 30.78 UNK   |
| No | Yes | Complete | 172.7 | 84    | 28.16 O POS |
| No | Yes | Complete | 157.5 | 75    | 30.23 UNK   |
| No | No  | Complete | 182.9 | 59.1  | 17.67 UNK   |
| No | No  | Complete | 160   | 53.5  | 20.9 UNK    |
| No | No  | Complete | 175.3 | 68.2  | 22.19 B POS |
| No | No  | Complete | 165   | 90    | 33.06 UNK   |
| No | Yes | Complete | 139.7 | 68.2  | 34.95 UNK   |
| No | Yes | Complete | 175.3 | 62.2  | 20.24 UNK   |
| No | No  | Complete | 177   | 114   | 36.39 B POS |
| No | No  | Complete | 165.1 | 84.3  | 30.93 O NEG |
| No | No  | Complete | 165.1 | 81.8  | 30.01 UNK   |
| No | Yes | Complete | 167.6 | 77.3  | 27.52 UNK   |
| No | No  | Complete | 167.6 | 73.3  | 26.09 A POS |
| No | Yes | Complete | 182.9 | 95.5  | 28.55 UNK   |
| No | No  | Complete | 180.3 | 92.5  | 28.45 UNK   |
| No | No  | Complete | 165.1 | 65    | 23.85 UNK   |
| No | No  | Complete | 170   | 95.3  | 32.98 UNK   |
| No | No  | Complete | 177.8 | 87.3  | 27.62 UNK   |
| No | No  | Complete | 160   | 84.1  | 32.85 UNK   |
| No | No  | Complete | 172.7 | 83.6  | 28.03 UNK   |
| No | No  | Complete | 150   | 56    | 24.89 UNK   |
| No | No  | Complete | 177.8 | 85.5  | 27.05 UNK   |
| No | Yes | Complete | 170.7 | 108   | 37.06 UNK   |
| No | No  | Complete | 167.6 | 118.2 | 42.08 UNK   |
| No | Yes | Complete | 149.9 | 70.3  | 31.29 O POS |
| No | No  | Complete | 167.6 | 70.5  | 25.1 UNK    |
| No | No  | Complete | 147.5 | 77.3  | 35.53 UNK   |
| No | No  | Complete | 165.1 | 59.1  | 21.68 A POS |
| No | No  | Complete | 180.3 | 156.6 | 48.17 UNK   |

|    |     |          |        |       |       |       |
|----|-----|----------|--------|-------|-------|-------|
| No | No  | Complete | 147.3  | 54    | 24.89 | O POS |
| No | No  | Complete | 160    | 74.1  | 28.95 | A POS |
| No | No  | Complete | 150    | 65.5  | 29.11 | UNK   |
| No | No  | Complete | 185.4  | 113.6 | 33.05 | UNK   |
| No | No  | Complete | 165.1  | 38.6  | 14.16 | O POS |
| No | Yes | Complete | 188    | 80    | 22.63 | UNK   |
| No | No  | Complete | 172.7  | 77.3  | 25.92 | UNK   |
| No | Yes | Complete | 160    | 98.3  | 38.4  | A POS |
| No | No  | Complete | 157.5  | 59.1  | 23.82 | O POS |
| No | No  | Complete | 168.8  | 77    | 27.02 | UNK   |
| No | Yes | Complete | 160    | 61.4  | 23.98 | UNK   |
| No | No  | Complete | 165    | 55    | 20.2  | UNK   |
| No | No  | Complete | 155    | 82.5  | 34.34 | UNK   |
| No | No  | Complete | 162.6  | 81.8  | 30.94 | UNK   |
| No | Yes | Complete | 170.2  | 88.3  | 30.48 | UNK   |
| No | No  | Complete | 167.6  | 77.3  | 27.52 | O POS |
| No | No  | Complete | 170    | 81    | 28.03 | UNK   |
| No | No  | Complete | 170.2  | 100   | 34.52 | UNK   |
| No | No  | Complete | 170.2  | 79.6  | 27.48 | O POS |
| NA | NA  | Complete | 160.02 | 79.1  | 30.89 | UNK   |
| No | No  | Complete | 165.1  | 95.5  | 35.04 | A POS |
| No | No  | Complete | 175.3  | 90    | 29.29 | UNK   |
| No | Yes | Complete | 172    | 104.5 | 35.32 | UNK   |
| No | No  | Complete | 179.9  | 74.8  | 23.11 | UNK   |
| No | Yes | Complete | 153.7  | 59    | 24.97 | UNK   |
| No | No  | Complete | 152.4  | 40    | 17.22 | UNK   |
| No | No  | Complete | 167.6  | 84.1  | 29.94 | B POS |
| No | No  | Complete | 172.7  | 68    | 22.8  | A POS |
| No | No  | Complete | 165.1  | 70.4  | 25.83 | A POS |
| No | No  | Complete | 160    | 79.5  | 31.05 | A POS |
| No | No  | Complete | 165.1  | 102   | 37.42 | O POS |
| No | No  | Complete | 151.2  | 77    | 33.68 | UNK   |
| No | Yes | Complete | 172.7  | 132.5 | 44.43 | UNK   |
| No | No  | Complete | 173    | 76    | 25.39 | O POS |
| No | No  | Complete | 167.6  | 85.7  | 30.51 | UNK   |
| No | No  | Complete | 177.8  | 71.2  | 22.52 | O POS |
| No | No  | Complete | 152.4  | 46.3  | 19.93 | UNK   |
| No | No  | Complete | 175.2  | 75.7  | 24.66 | UNK   |
| No | Yes | Complete | 170.1  | 72.7  | 25.13 | UNK   |
| No | No  | Complete | 170.1  | 159   | 54.95 | O POS |
| No | No  | Complete | 170.1  | 102.2 | 35.32 | UNK   |
| No | No  | Complete | 154.9  | 47.7  | 19.88 | UNK   |
| No | No  | Complete | 187.9  | 122.7 | 34.75 | UNK   |
| No | No  | Complete | 170.1  | 68.1  | 23.54 | UNK   |
| No | No  | Complete | 161.2  | 64    | 24.63 | UNK   |

|    |     |          |       |       |             |
|----|-----|----------|-------|-------|-------------|
| No | No  | Complete | 177.8 | 68.1  | 21.54 UNK   |
| No | No  | Complete | 175.2 | 78.6  | 25.61 UNK   |
| No | No  | Complete | 165.1 | 86.3  | 31.66 UNK   |
| No | No  | Complete | 172.7 | 86.1  | 28.87 UNK   |
| No | No  | Complete | 152.4 | 72.7  | 31.3 O POS  |
| No | No  | Complete | 164   | 68    | 25.28 UNK   |
| No | No  | Complete | 157.4 | 54.5  | 22 UNK      |
| No | No  | Complete | 157.4 | 73.9  | 29.83 O POS |
| No | No  | Complete | 165.1 | 85.5  | 31.37 UNK   |
| No | No  | Complete | 165.3 | 77.2  | 28.25 O POS |
| No | No  | Complete | 168   | 81.6  | 28.91 A POS |
| No | Yes | Complete | 162.5 | 81.6  | 30.9 UNK    |
| No | No  | Complete | 160   | 84    | 32.81 UNK   |
| No | No  | Complete | 170.1 | 141.5 | 48.9 O POS  |
| No | No  | Complete | 172.7 | 86.3  | 28.94 UNK   |
| No | No  | Complete | 170   | 75    | 25.95 UNK   |
| No | No  | Complete | 152.4 | 68    | 29.28 UNK   |
| No | No  | Complete | 160   | 72.5  | 28.32 UNK   |
| No | Yes | Complete | 152.4 | 54.5  | 23.47 UNK   |
| No | No  | Complete | 152.4 | 61.2  | 26.35 A POS |
| No | No  | Complete | 167.6 | 60    | 21.36 UNK   |
| No | No  | Complete | 187.9 | 109   | 30.87 UNK   |
| No | No  | Complete | 170   | 84    | 29.07 UNK   |
| No | No  | Complete | 162.5 | 159   | 60.21 O POS |
| No | No  | Complete | 165.1 | 86.1  | 31.59 UNK   |
| No | No  | Complete | 161.5 | 76.4  | 29.29 A POS |
| No | No  | Complete | 172.2 | 59    | 19.9 A POS  |
| No | No  | Complete | 152.4 | 40.9  | 17.61 UNK   |
| No | Yes | Complete | 170.1 | 77.2  | 26.68 UNK   |
| No | Yes | Complete | 182.8 | 109   | 32.62 UNK   |
| No | No  | Complete | 175.2 | 94.3  | 30.72 UNK   |
| No | No  | Complete | 182.8 | 81.8  | 24.48 UNK   |
| No | Yes | Complete | 182.8 | 81.8  | 24.48 UNK   |
| No | No  | Complete | 170.1 | 88    | 30.41 A POS |
| No | No  | Complete | 160   | 75    | 29.3 UNK    |
| No | No  | Complete | 167.6 | 90.7  | 32.29 O POS |
| No | No  | Complete | 179.8 | 79.5  | 24.59 A POS |
| No | No  | Complete | 152.4 | 52.2  | 22.48 O POS |
| No | No  | Complete | 182.8 | 108.8 | 32.56 UNK   |
| No | No  | Complete | 161.5 | 70.9  | 27.18 UNK   |
| No | Yes | Complete | 185.4 | 84.2  | 24.5 UNK    |
| No | No  | Complete | 172.7 | 75.4  | 25.28 UNK   |
| No | No  | Complete | 158.5 | 70    | 27.86 UNK   |
| No | No  | Complete | 168   | 81.8  | 28.98 UNK   |
| No | Yes | Complete | 167.6 | 86.3  | 30.72 UNK   |

|    |     |          |        |       |             |
|----|-----|----------|--------|-------|-------------|
| No | No  | Complete | 170.1  | 83.9  | 29 UNK      |
| No | No  | Complete | 160    | 97    | 37.89 O POS |
| No | No  | Complete | 170.1  | 77.2  | 26.68 A POS |
| No | Yes | Complete | 165.1  | 79.5  | 29.17 UNK   |
| No | No  | Complete | 165.1  | 79.5  | 29.17 UNK   |
| No | No  | Complete | 156    | 54.5  | 22.39 UNK   |
| No | No  | Complete | 162.5  | 72.7  | 27.53 UNK   |
| No | No  | Complete | 172.7  | 93.1  | 31.22 UNK   |
| No | No  | Complete | 154.9  | 79.5  | 33.13 UNK   |
| No | No  | Complete | 149.8  | 54.5  | 24.29 UNK   |
| No | Yes | Complete | 178    | 129.5 | 40.87 UNK   |
| No | No  | Complete | 157.4  | 104.5 | 42.18 UNK   |
| No | Yes | Complete | 182.8  | 95.8  | 28.67 UNK   |
| No | No  | Complete | 165.1  | 79.1  | 29.02 O POS |
| No | No  | Complete | 170    | 100   | 34.6 UNK    |
| No | Yes | Complete | 157.4  | 67    | 27.04 O POS |
| No | No  | Complete | 162.5  | 59.2  | 22.42 UNK   |
| No | No  | Complete | 167.6  | 90    | 32.04 UNK   |
| No | No  | Complete | 182.8  | 90    | 26.93 A POS |
| No | No  | Complete | 162.5  | 67.2  | 25.45 B POS |
| No | No  | Complete | 162.5  | 63.6  | 24.09 A POS |
| No | No  | Complete | 162.5  | 63.6  | 24.09 A POS |
| No | No  | Complete | 171.36 | 81.1  | 27.62 O POS |
| No | No  | Complete | 165.1  | 77.2  | 28.32 UNK   |
| No | No  | Complete | 165.1  | 90.9  | 33.35 UNK   |
| No | Yes | Complete | 186.4  | 90    | 25.9 UNK    |
| No | Yes | Complete | 157.4  | 109   | 44 O POS    |
| No | Yes | Complete | 175.2  | 93.4  | 30.43 UNK   |
| No | No  | Complete | 152.4  | 79    | 34.01 UNK   |
| No | Yes | Complete | 183    | 94    | 28.07 UNK   |
| No | No  | Complete | 182.8  | 94    | 28.13 UNK   |
| No | Yes | Complete | 177.8  | 109   | 34.48 UNK   |
| No | No  | Complete | 165.1  | 77.1  | 28.29 UNK   |
| No | No  | Complete | 182.8  | 108.8 | 32.56 UNK   |
| No | No  | Complete | 168    | 80    | 28.34 UNK   |
| No | No  | Complete | 160    | 65    | 25.39 UNK   |
| No | Yes | Complete | 175.2  | 95    | 30.95 A POS |
| No | Yes | Complete | 175.25 | 113.6 | 36.99 UNK   |
| No | No  | Complete | 165.1  | 68.1  | 24.98 UNK   |
| No | Yes | Complete | 162.5  | 136.3 | 51.62 UNK   |
| No | No  | Complete | 160    | 90    | 35.16 UNK   |
| No | No  | Complete | 172.7  | 87.2  | 29.24 UNK   |
| No | No  | Complete | 172.7  | 67.2  | 22.53 UNK   |
| No | No  | Complete | 170.1  | 63.5  | 21.95 UNK   |
| No | No  | Complete | 176.7  | 79.4  | 25.43 UNK   |

|    |     |          |        |       |             |
|----|-----|----------|--------|-------|-------------|
| No | No  | Complete | 177.8  | 113.6 | 35.93 UNK   |
| No | No  | Complete | 167.6  | 77.2  | 27.48 UNK   |
| No | No  | Complete | 154.9  | 59    | 24.59 UNK   |
| No | Yes | Complete | 162.56 | 136.3 | 51.58 UNK   |
| No | No  | Complete | 157.48 | 65.6  | 26.45 UNK   |
| No | Yes | Complete | 160.02 | 136.4 | 53.27 UNK   |
| No | No  | Complete | 167.64 | 104.6 | 37.22 UNK   |
| No | No  | Complete | 182.88 | 109.1 | 32.62 A POS |
| No | No  | Complete | 152.4  | 80.9  | 34.83 O POS |
| No | Yes | Complete | 167.64 | 95.5  | 33.98 UNK   |
| No | No  | Complete | 162.56 | 75    | 28.38 UNK   |
| No | No  | Complete | 193    | 136.4 | 36.62 UNK   |
| No | No  | Complete | 193.04 | 136.1 | 36.52 UNK   |
| No | Yes | Complete | 175.26 | 88.5  | 28.81 UNK   |
| No | No  | Complete | 157.48 | 84.3  | 33.99 O POS |
| No | No  | Complete | 160.02 | 91    | 35.54 O POS |
| No | No  | Complete | 190    | 128   | 35.46 B POS |
| No | Yes | Complete | 170.18 | 50    | 17.26 UNK   |
| No | No  | Complete | 157.48 | 89.4  | 36.05 UNK   |
| No | Yes | Complete | 152.4  | 63.6  | 27.38 UNK   |
| No | Yes | Complete | 165.1  | 118.2 | 43.36 UNK   |
| No | Yes | Complete | 177.8  | 79.6  | 25.18 UNK   |
| No | Yes | Complete | 165.1  | 94.8  | 34.78 O POS |
| No | No  | Complete | 182.88 | 103.5 | 30.95 UNK   |
| No | No  | Complete | 152.4  | 79.1  | 34.06 O POS |
| No | Yes | Complete | 154.94 | 79.7  | 33.2 UNK    |
| No | No  | Complete | 154.94 | 73    | 30.41 UNK   |
| No | No  | Complete | 165.1  | 54.6  | 20.03 UNK   |
| No | No  | Complete | 160.02 | 136.4 | 53.27 UNK   |
| No | No  | Complete | 172.72 | 68    | 22.79 UNK   |
| No | No  | Complete | 152.4  | 72.1  | 31.04 A POS |
| No | Yes | Complete | 170.18 | 74.6  | 25.76 UNK   |
| No | No  | Complete | 162.56 | 90.9  | 34.4 UNK    |
| No | Yes | Complete | 182.88 | 81.3  | 24.31 A POS |
| No | No  | Complete | 165.1  | 63.6  | 23.33 O POS |
| No | No  | Complete | 170.18 | 49.9  | 17.23 O POS |
| No | No  | Complete | 170.2  | 44.8  | 15.47 O POS |
| No | No  | Complete | 154.94 | 59.1  | 24.62 UNK   |
| No | Yes | Complete | 180.34 | 118   | 36.28 UNK   |
| No | No  | Complete | 172.72 | 106.6 | 35.73 A POS |
| No | No  | Complete | 172.72 | 115.5 | 38.72 UNK   |
| No | No  | Complete | 170    | 68.2  | 23.6 UNK    |
| No | No  | Complete | 190.5  | 63.5  | 17.5 B POS  |
| No | No  | Complete | 177.8  | 95.5  | 30.21 UNK   |
| No | No  | Complete | 193    | 97    | 26.04 UNK   |

|    |     |          |        |       |       |       |
|----|-----|----------|--------|-------|-------|-------|
| No | Yes | Complete | 160.02 | 68.2  | 26.63 | A POS |
| No | No  | Complete | 163.8  | 93    | 34.66 | O NEG |
| No | No  | Complete | 144.78 | 50.3  | 24    | A POS |
| No | No  | Complete | 172.72 | 86.4  | 28.96 | O NEG |
| No | Yes | Complete | 165.1  | 113.6 | 41.68 | UNK   |
| No | No  | Complete | 175.26 | 62.6  | 20.38 | UNK   |
| No | No  | Complete | 162.56 | 50    | 18.92 | UNK   |
| No | No  | Complete | 180.34 | 88.6  | 27.24 | B POS |
| No | No  | Complete | 165.1  | 90.9  | 33.35 | UNK   |
| No | No  | Complete | 177.8  | 67    | 21.19 | A POS |
| No | No  | Complete | 157.48 | 56.8  | 22.9  | UNK   |
| No | Yes | Complete | 165.1  | 65.9  | 24.18 | UNK   |
| No | No  | Complete | 180    | 114   | 35.19 | B POS |
| No | No  | Complete | 152.4  | 68    | 29.28 | A POS |
| No | Yes | Complete | 176.4  | 80.6  | 25.9  | UNK   |
| No | Yes | Complete | 182.88 | 195   | 58.3  | UNK   |
| No | No  | Complete | 147.32 | 52.2  | 24.05 | UNK   |
| No | No  | Complete | 175.26 | 68    | 22.14 | UNK   |
| No | No  | Complete | 167.67 | 77.7  | 27.64 | UNK   |
| No | No  | Complete | 170.18 | 59.1  | 20.41 | UNK   |
| No | No  | Complete | 164    | 100.8 | 37.48 | UNK   |
| No | No  | Complete | 162.56 | 59    | 22.33 | UNK   |
| No | No  | Complete | 167    | 75.1  | 26.93 | UNK   |
| No | No  | Complete | 167.64 | 77.3  | 27.51 | UNK   |
| No | No  | Complete | 170.18 | 75    | 25.9  | UNK   |
| No | No  | Complete | 162    | 61    | 23.24 | UNK   |
| No | No  | Complete | 167    | 118   | 42.31 | UNK   |
| No | Yes | Complete | 182.88 | 78.9  | 23.59 | O POS |
| No | Yes | Complete | 180.34 | 99.8  | 30.69 | UNK   |
| No | No  | Complete | 152.4  | 72.7  | 31.3  | A POS |
| No | No  | Complete | 170.18 | 109.1 | 37.67 | UNK   |
| No | No  | Complete | 160.02 | 86.4  | 33.74 | UNK   |
| No | No  | Complete | 170.18 | 74.8  | 25.83 | UNK   |
| No | No  | Complete | 178    | 104.5 | 32.98 | O POS |
| No | Yes | Complete | 160    | 55.9  | 21.84 | UNK   |
| No | No  | Complete | 182.88 | 81.8  | 24.46 | O POS |
| No | No  | Complete | 165.1  | 124.7 | 45.75 | UNK   |
| No | Yes | Complete | 156    | 81.8  | 33.61 | UNK   |
| No | Yes | Complete | 172.72 | 136.1 | 45.62 | UNK   |
| No | No  | Complete | 170.18 | 67.7  | 23.38 | A POS |
| No | No  | Complete | 170.18 | 92.7  | 32.01 | UNK   |
| No | Yes | Complete | 152    | 65    | 28.13 | UNK   |
| No | Yes | Complete | 160.02 | 95    | 37.1  | UNK   |
| No | No  | Complete | 165.1  | 72.6  | 26.63 | O POS |
| No | No  | Complete | 160.02 | 71.7  | 28    | A POS |

|    |     |          |        |       |             |
|----|-----|----------|--------|-------|-------------|
| No | No  | Complete | 155    | 68    | 28.3 UNK    |
| No | No  | Complete | 157.48 | 90.9  | 36.65 UNK   |
| No | No  | Complete | 172.72 | 102.3 | 34.29 UNK   |
| No | No  | Complete | 172.72 | 77.3  | 25.91 UNK   |
| No | No  | Complete | 160.02 | 56.8  | 22.18 UNK   |
| No | No  | Complete | 162.56 | 63.6  | 24.07 UNK   |
| No | No  | Complete | 162.56 | 70.5  | 26.68 UNK   |
| No | No  | Complete | 161.54 | 77.3  | 29.62 UNK   |
| No | Yes | Complete | 183.96 | 92.3  | 27.27 UNK   |
| No | No  | Complete | 157.48 | 63.6  | 25.65 UNK   |
| No | Yes | Complete | 152.4  | 73.6  | 31.69 UNK   |
| No | No  | Complete | 167.64 | 109.1 | 38.82 O POS |
| No | No  | Complete | 170.18 | 77.3  | 26.69 UNK   |
| No | No  | Complete | 172.72 | 95.3  | 31.95 UNK   |
| No | No  | Complete | 170.18 | 68.2  | 23.55 UNK   |
| No | No  | Complete | 162    | 70    | 26.67 UNK   |
| No | No  | Complete | 172.72 | 76.2  | 25.54 O POS |
| No | Yes | Complete | 170.18 | 86.4  | 29.83 UNK   |
| No | No  | Complete | 167.64 | 65.9  | 23.45 O POS |
| No | No  | Complete | 172.72 | 69    | 23.13 UNK   |
| No | No  | Complete | 152.5  | 65.9  | 28.34 UNK   |
| No | No  | Complete | 162.56 | 68.2  | 25.81 UNK   |
| No | No  | Complete | 167.64 | 84.1  | 29.93 UNK   |
| No | Yes | Complete | 165.1  | 79.5  | 29.17 UNK   |
| No | No  | Complete | 177.8  | 81.6  | 25.81 UNK   |
| No | No  | Complete | 167.6  | 72.6  | 25.85 O POS |
| No | No  | Complete | 149.9  | 62.1  | 27.64 A POS |
| No | No  | Complete | 170.1  | 92.8  | 32.07 UNK   |
| No | Yes | Complete | 149    | 75    | 33.78 O POS |
| No | No  | Complete | 163.8  | 84    | 31.31 O POS |
| No | No  | Complete | 177.8  | 118.2 | 37.39 UNK   |
| No | Yes | Complete | 165.1  | 86.4  | 31.7 UNK    |
| No | Yes | Complete | 154.9  | 71.2  | 29.67 UNK   |
| No | Yes | Complete | 185.4  | 100   | 29.09 UNK   |
| No | No  | Complete | 142.4  | 71.9  | 35.46 UNK   |
| No | No  | Complete | 137.16 | 43.2  | 22.96 UNK   |
| No | No  | Complete | 165.1  | 77.3  | 28.36 UNK   |
| No | No  | Complete | 162.5  | 74    | 28.02 UNK   |
| No | No  | Complete | 188    | 104.6 | 29.59 UNK   |
| No | No  | Complete | 155    | 33.4  | 13.9 UNK    |
| No | No  | Complete | 185.4  | 97.7  | 28.42 UNK   |
| No | No  | Complete | 180.34 | 110.5 | 33.98 UNK   |
| No | No  | Complete | 180.34 | 65.9  | 20.26 B POS |
| No | No  | Complete | 182.88 | 99.1  | 29.63 UNK   |
| No | No  | Complete | 185.42 | 75.9  | 22.08 A POS |



|    |     |          |        |       |              |
|----|-----|----------|--------|-------|--------------|
| No | No  | Complete | 182.88 | 72.7  | 21.74 UNK    |
| No | No  | Complete | 177.8  | 81.7  | 25.84 UNK    |
| No | No  | Complete | 160.02 | 54.6  | 21.32 UNK    |
| No | No  | Complete | 167.64 | 77.3  | 27.51 UNK    |
| No | Yes | Complete | 170.2  | 86.2  | 29.76 UNK    |
| No | No  | Complete | 187.96 | 95.5  | 27.03 UNK    |
| No | No  | Complete | 180    | 77    | 23.77 UNK    |
| No | No  | Complete | 167.64 | 109.3 | 38.89 B POS  |
| No | Yes | Complete | 182.88 | 90.9  | 27.18 A POS  |
| No | Yes | Complete | 155.75 | 79.6  | 32.81 UNK    |
| No | No  | Complete | 165    | 45    | 16.53 UNK    |
| No | No  | Complete | 170.18 | 95.8  | 33.08 UNK    |
| No | No  | Complete | 165    | 63    | 23.14 UNK    |
| No | No  | Complete | 177.8  | 97.7  | 30.91 UNK    |
| No | No  | Complete | 179.8  | 68    | 21.03 UNK    |
| No | Yes | Complete | 167.6  | 113.6 | 40.44 UNK    |
| No | No  | Complete | 160.02 | 100   | 39.05 UNK    |
| No | No  | Complete | 182.88 | 77.3  | 23.11 AB POS |
| No | No  | Complete | 187.96 | 181.8 | 51.46 A POS  |
| No | No  | Complete | 187.96 | 154.5 | 43.73 A POS  |
| No | No  | Complete | 160    | 56.8  | 22.19 A POS  |
| No | No  | Complete | 172.7  | 56.8  | 19.04 A POS  |
| No | No  | Complete | 167.64 | 79.1  | 28.15 UNK    |
| No | No  | Complete | 180.34 | 111.4 | 34.25 UNK    |
| No | No  | Complete | 175.26 | 78    | 25.39 UNK    |
| No | Yes | Complete | 160.02 | 72.7  | 28.39 UNK    |
| No | No  | Complete | 162.56 | 65.9  | 24.94 UNK    |
| No | No  | Complete | 158    | 55.9  | 22.39 UNK    |
| No | No  | Complete | 161    | 63.6  | 24.54 O POS  |
| No | No  | Complete | 180.34 | 129.6 | 39.85 UNK    |
| No | Yes | Complete | 167.64 | 63.6  | 22.63 UNK    |
| No | No  | Complete | 170.18 | 92.8  | 32.04 UNK    |
| No | No  | Complete | 162.56 | 70    | 26.49 UNK    |
| No | No  | Complete | 162.56 | 54.4  | 20.59 UNK    |
| No | Yes | Complete | 162.56 | 72.7  | 27.51 AB POS |
| No | No  | Complete | 160.02 | 74.8  | 29.21 UNK    |
| No | No  | Complete | 158    | 68    | 27.24 UNK    |
| No | No  | Complete | 175.26 | 115.7 | 37.67 A POS  |
| No | No  | Complete | 155    | 54.6  | 22.73 UNK    |
| No | No  | Complete | 182    | 70    | 21.13 UNK    |
| No | Yes | Complete | 162.56 | 67.6  | 25.58 UNK    |
| No | No  | Complete | 172.2  | 84.1  | 28.36 A POS  |
| No | No  | Complete | 154.94 | 79.6  | 33.16 A POS  |
| No | No  | Complete | 149.86 | 71.4  | 31.79 O POS  |
| No | No  | Complete | 172.72 | 81.4  | 27.29 A POS  |

|     |     |          |       |      |             |
|-----|-----|----------|-------|------|-------------|
| No  | No  | Complete | 163   | 91   | 34.25 UNK   |
| No  | No  | Complete | 152.4 | 63.6 | 27.38 UNK   |
| No  | No  | Complete | 152.4 | 63.6 | 27.38 UNK   |
| Yes | Yes | Complete | 150   | 81.6 | 36.27 UNK   |
| No  | No  | Complete | 165.1 | 75.3 | 27.62 O POS |
| No  | No  | Complete | 187.9 | 88.5 | 25.07 O POS |
| No  | No  | Complete | 167.6 | 80.6 | 28.69 A POS |

|             |    |          |           |     |     |    |
|-------------|----|----------|-----------|-----|-----|----|
| NA          | NA | NA       | Full Code | No  | No  | NA |
| NA          | NA | NA       | Full Code | NA  | No  | NA |
| NA          | NA | NA       | Full Code | No  | No  | NA |
| O POSITIVE  | O  | POSITIVE | Full Code | Yes | No  | NA |
| NA          | NA | NA       | Full Code | No  | No  | NA |
| AB POSITIVE | AB | POSITIVE | DNR/DNI   | No  | No  | NA |
| NA          | NA | NA       | Full Code | NA  | No  | NA |
| NA          | NA | NA       | DNR/DNI   | No  | No  | NA |
| NA          | NA | NA       | Full Code | NA  | No  | NA |
| NA          | NA | NA       | Full Code | No  | No  | NA |
| O POSITIVE  | O  | POSITIVE | Full Code | NA  | No  | NA |
| NA          | NA | NA       | Full Code | NA  | No  | NA |
| O POSITIVE  | O  | POSITIVE | Full Code | No  | No  | NA |
| NA          | NA | NA       | Full Code | No  | No  | NA |
| NA          | NA | NA       | Full Code | No  | No  | NA |
| NA          | NA | NA       | Full Code | NA  | No  | NA |
| NA          | NA | NA       | Full Code | NA  | No  | NA |
| NA          | NA | NA       | Full Code | No  | No  | NA |
| A POSITIVE  | A  | POSITIVE | Full Code | No  | No  | NA |
| NA          | NA | NA       | DNR/DNI   | No  | No  | NA |
| A POSITIVE  | A  | POSITIVE | Full Code | NA  | No  | NA |
| O NEGATIVE  | O  | NEGATIVE | DNR       | NA  | No  | NA |
| NA          | NA | NA       | DNR/DNI   | No  | Yes | No |
| B POSITIVE  | B  | POSITIVE | DNR/DNI   | NA  | No  | NA |
| AB POSITIVE | AB | POSITIVE | Full Code | No  | No  | NA |
| NA          | NA | NA       | Full Code | NA  | Yes | No |
| NA          | NA | NA       | Full Code | NA  | No  | NA |
| O POSITIVE  | O  | POSITIVE | DNR/DNI   | No  | No  | NA |
| A POSITIVE  | A  | POSITIVE | Full Code | NA  | No  | NA |
| A POSITIVE  | A  | POSITIVE | Full Code | Yes | No  | NA |
| A POSITIVE  | A  | POSITIVE | Full Code | NA  | No  | NA |
| O POSITIVE  | O  | POSITIVE | Full Code | Yes | No  | NA |
| NA          | NA | NA       | DNR/DNI   | NA  | No  | NA |
| NA          | NA | NA       | Full Code | No  | No  | NA |
| A POSITIVE  | A  | POSITIVE | Full Code | NA  | No  | NA |
| NA          | NA | NA       | Full Code | No  | No  | NA |
| NA          | NA | NA       | Full Code | NA  | No  | NA |
| NA          | NA | NA       | Full Code | NA  | No  | NA |
| NA          | NA | NA       | Full Code | NA  | No  | NA |
| O POSITIVE  | O  | POSITIVE | DNR/DNI   | NA  | No  | NA |
| O POSITIVE  | O  | POSITIVE | NA        | NA  | Yes | No |
| O POSITIVE  | O  | POSITIVE | Full Code | NA  | Yes | No |
| NA          | NA | NA       | Full Code | NA  | No  | NA |
| NA          | NA | NA       | DNR/DNI   | No  | Yes | No |
| NA          | NA | NA       | Full Code | No  | No  | NA |

|            |    |          |           |     |     |     |
|------------|----|----------|-----------|-----|-----|-----|
| B POSITIVE | B  | POSITIVE | Full Code | Yes | No  | NA  |
| NA         | NA | NA       | Full Code | NA  | No  | NA  |
| NA         | NA | NA       | DNR/DNI   | No  | Yes | No  |
| O POSITIVE | O  | POSITIVE | DNR/DNI   | No  | Yes | No  |
| NA         | NA | NA       | Full Code | NA  | No  | NA  |
| O POSITIVE | O  | POSITIVE | Full Code | No  | No  | NA  |
| O POSITIVE | O  | POSITIVE | Full Code | No  | No  | NA  |
| O POSITIVE | O  | POSITIVE | Full Code | NA  | No  | NA  |
| O POSITIVE | O  | POSITIVE | Full Code | NA  | No  | NA  |
| NA         | NA | NA       | Full Code | NA  | No  | NA  |
| NA         | NA | NA       | Full Code | No  | No  | NA  |
| B POSITIVE | B  | POSITIVE | Full Code | NA  | No  | NA  |
| NA         | NA | NA       | Full Code | No  | No  | NA  |
| NA         | NA | NA       | Full Code | NA  | No  | NA  |
| O NEGATIVE | O  | NEGATIVE | DNR/DNI   | NA  | No  | NA  |
| O POSITIVE | O  | POSITIVE | DNR/DNI   | NA  | No  | NA  |
| NA         | NA | NA       | Full Code | NA  | No  | NA  |
| NA         | NA | NA       | DNR/DNI   | No  | No  | NA  |
| B POSITIVE | B  | POSITIVE | Full Code | Yes | No  | NA  |
| NA         | NA | NA       | Full Code | No  | No  | NA  |
| NA         | NA | NA       | Full Code | No  | No  | NA  |
| NA         | NA | NA       | DNR/DNI   | NA  | Yes | No  |
| NA         | NA | NA       | DNR       | NA  | No  | NA  |
| NA         | NA | NA       | Full Code | NA  | No  | NA  |
| NA         | NA | NA       | Full Code | NA  | No  | NA  |
| NA         | NA | NA       | Full Code | NA  | No  | NA  |
| NA         | NA | NA       | Full Code | No  | Yes | No  |
| NA         | NA | NA       | Full Code | NA  | Yes | No  |
| NA         | NA | NA       | Full Code | No  | No  | NA  |
| A POSITIVE | A  | POSITIVE | DNR/DNI   | NA  | No  | NA  |
| NA         | NA | NA       | Full Code | No  | No  | NA  |
| NA         | NA | NA       | Full Code | NA  | No  | NA  |
| A POSITIVE | A  | POSITIVE | DNR/DNI   | No  | Yes | No  |
| O POSITIVE | O  | POSITIVE | Full Code | NA  | Yes | Yes |
| A POSITIVE | A  | POSITIVE | Full Code | No  | No  | NA  |
| O POSITIVE | O  | POSITIVE | Full Code | No  | No  | NA  |
| O POSITIVE | O  | POSITIVE | DNR/DNI   | NA  | No  | NA  |
| A POSITIVE | A  | POSITIVE | Full Code | No  | No  | NA  |
| A POSITIVE | A  | POSITIVE | Full Code | NA  | No  | NA  |
| NA         | NA | NA       | Full Code | NA  | No  | NA  |
| NA         | NA | NA       | Full Code | NA  | No  | NA  |
| A NEGATIVE | A  | NEGATIVE | Full Code | NA  | Yes | No  |
| O POSITIVE | O  | POSITIVE | DNR/DNI   | No  | No  | NA  |
| A NEGATIVE | A  | NEGATIVE | DNR/DNI   | NA  | No  | NA  |
| O POSITIVE | O  | POSITIVE | DNR/DNI   | No  | No  | NA  |

|             |    |          |           |    |     |     |
|-------------|----|----------|-----------|----|-----|-----|
| NA          | NA | NA       | DNR/DNI   | No | No  | NA  |
| B POSITIVE  | B  | POSITIVE | DNR/DNI   | No | Yes | No  |
| B POSITIVE  | B  | POSITIVE | DNR/DNI   | No | Yes | No  |
| A POSITIVE  | A  | POSITIVE | Full Code | NA | Yes | No  |
| AB POSITIVE | AB | POSITIVE | DNR/DNI   | No | Yes | No  |
| NA          | NA | NA       | DNR/DNI   | NA | No  | NA  |
| NA          | NA | NA       | Full Code | NA | No  | NA  |
| NA          | NA | NA       | DNR/DNI   | No | No  | NA  |
| NA          | NA | NA       | Full Code | No | No  | NA  |
| A NEGATIVE  | A  | NEGATIVE | DNR/DNI   | No | No  | NA  |
| A POSITIVE  | A  | POSITIVE | DNR       | No | Yes | Yes |
| O POSITIVE  | O  | POSITIVE | Full Code | NA | No  | NA  |
| NA          | NA | NA       | Full Code | NA | No  | NA  |
| A POSITIVE  | A  | POSITIVE | DNR/DNI   | No | No  | NA  |
| O POSITIVE  | O  | POSITIVE | Full Code | No | Yes | No  |
| NA          | NA | NA       | DNR/DNI   | No | No  | NA  |
| NA          | NA | NA       | Full Code | NA | Yes | No  |
| O POSITIVE  | O  | POSITIVE | DNR/DNI   | No | Yes | No  |
| NA          | NA | NA       | Full Code | No | Yes | No  |
| A POSITIVE  | A  | POSITIVE | Full Code | NA | Yes | No  |
| A POSITIVE  | A  | POSITIVE | Full Code | NA | Yes | No  |
| O POSITIVE  | O  | POSITIVE | Full Code | NA | No  | NA  |
| A POSITIVE  | A  | POSITIVE | Full Code | NA | No  | NA  |
| O POSITIVE  | O  | POSITIVE | DNR/DNI   | NA | No  | NA  |
| O POSITIVE  | O  | POSITIVE | Full Code | No | Yes | No  |
| O POSITIVE  | O  | POSITIVE | Full Code | No | Yes | No  |
| B POSITIVE  | B  | POSITIVE | Full Code | NA | No  | NA  |
| NA          | NA | NA       | Full Code | NA | No  | NA  |
| O POSITIVE  | O  | POSITIVE | Full Code | NA | No  | NA  |
| NA          | NA | NA       | Full Code | NA | No  | NA  |
| O POSITIVE  | O  | POSITIVE | DNR/DNI   | No | No  | NA  |
| NA          | NA | NA       | Full Code | NA | No  | NA  |
| NA          | NA | NA       | Full Code | NA | No  | NA  |
| NA          | NA | NA       | Full Code | NA | No  | NA  |
| B POSITIVE  | B  | POSITIVE | DNR/DNI   | No | No  | NA  |
| O POSITIVE  | O  | POSITIVE | Full Code | NA | No  | NA  |
| NA          | NA | NA       | Full Code | No | No  | NA  |
| NA          | NA | NA       | Full Code | NA | No  | NA  |
| A POSITIVE  | A  | POSITIVE | Full Code | No | No  | NA  |
| NA          | NA | NA       | Full Code | NA | No  | NA  |
| NA          | NA | NA       | Full Code | NA | No  | NA  |
| A POSITIVE  | A  | POSITIVE | Full Code | NA | Yes | No  |
| A POSITIVE  | A  | POSITIVE | Full Code | NA | Yes | No  |
| NA          | NA | NA       | Full Code | No | Yes | No  |
| NA          | NA | NA       | Full Code | NA | No  | NA  |

|            |    |          |           |    |     |    |
|------------|----|----------|-----------|----|-----|----|
| NA         | NA | NA       | Full Code | No | No  | NA |
| NA         | NA | NA       | Full Code | NA | No  | NA |
| NA         | NA | NA       | Full Code | No | No  | NA |
| NA         | NA | NA       | Full Code | NA | No  | NA |
| O POSITIVE | O  | POSITIVE | Full Code | No | No  | NA |
| NA         | NA | NA       | Full Code | NA | No  | NA |
| B POSITIVE | B  | POSITIVE | DNR/DNI   | No | No  | NA |
| A POSITIVE | A  | POSITIVE | Full Code | No | No  | NA |
| NA         | NA | NA       | Full Code | No | No  | NA |
| O POSITIVE | O  | POSITIVE | Full Code | No | No  | NA |
| O POSITIVE | O  | POSITIVE | Full Code | NA | No  | NA |
| O POSITIVE | O  | POSITIVE | Full Code | No | No  | NA |
| NA         | NA | NA       | Full Code | No | No  | NA |
| O POSITIVE | O  | POSITIVE | Full Code | NA | No  | NA |
| O POSITIVE | O  | POSITIVE | Full Code | No | No  | NA |
| O POSITIVE | O  | POSITIVE | DNR       | NA | No  | NA |
| O POSITIVE | O  | POSITIVE | Full Code | NA | No  | NA |
| O NEGATIVE | O  | NEGATIVE | NA        | No | No  | NA |
| NA         | NA | NA       | Full Code | NA | No  | NA |
| A POSITIVE | A  | POSITIVE | Full Code | NA | No  | NA |
| NA         | NA | NA       | Full Code | No | No  | NA |
| NA         | NA | NA       | Full Code | NA | No  | NA |
| A NEGATIVE | A  | NEGATIVE | DNR/DNI   | NA | No  | NA |
| B POSITIVE | B  | POSITIVE | DNR/DNI   | NA | No  | NA |
| A POSITIVE | A  | POSITIVE | DNR/DNI   | NA | No  | NA |
| A NEGATIVE | A  | NEGATIVE | Full Code | No | Yes | No |
| O POSITIVE | O  | POSITIVE | DNR/DNI   | NA | No  | NA |
| NA         | NA | NA       | Full Code | NA | Yes | No |
| NA         | NA | NA       | Full Code | NA | No  | NA |
| NA         | NA | NA       | DNR/DNI   | No | Yes | No |
| NA         | NA | NA       | Full Code | NA | No  | NA |
| NA         | NA | NA       | Full Code | NA | No  | NA |
| O POSITIVE | O  | POSITIVE | Full Code | No | No  | NA |
| NA         | NA | NA       | Full Code | No | No  | NA |
| A POSITIVE | A  | POSITIVE | Full Code | NA | No  | NA |
| O POSITIVE | O  | POSITIVE | DNR/DNI   | No | Yes | No |
| O POSITIVE | O  | POSITIVE | DNR/DNI   | No | No  | NA |
| AB NEGATIV | AB | NEGATIVE | DNR/DNI   | NA | No  | NA |
| NA         | NA | NA       | Full Code | No | No  | NA |
| NA         | NA | NA       | Full Code | NA | No  | NA |
| A POSITIVE | A  | POSITIVE | Full Code | NA | No  | NA |
| NA         | NA | NA       | Full Code | No | No  | NA |
| NA         | NA | NA       | Full Code | No | No  | NA |
| O POSITIVE | O  | POSITIVE | Full Code | NA | Yes | No |
| A POSITIVE | A  | POSITIVE | DNR/DNI   | NA | Yes | No |

|             |    |          |           |    |     |    |
|-------------|----|----------|-----------|----|-----|----|
| AB POSITIVE | AB | POSITIVE | Full Code | No | No  | NA |
| AB POSITIVE | AB | POSITIVE | Full Code | No | No  | NA |
| O POSITIVE  | O  | POSITIVE | Full Code | No | No  | NA |
| O POSITIVE  | O  | POSITIVE | Full Code | NA | No  | NA |
| O POSITIVE  | O  | POSITIVE | Full Code | NA | No  | NA |
| NA          | NA | NA       | Full Code | NA | No  | NA |
| O POSITIVE  | O  | POSITIVE | Full Code | NA | No  | NA |
| NA          | NA | NA       | Full Code | NA | Yes | No |
| A POSITIVE  | A  | POSITIVE | DNR/DNI   | No | No  | NA |
| O POSITIVE  | O  | POSITIVE | DNR/DNI   | NA | No  | NA |
| B POSITIVE  | B  | POSITIVE | DNR/DNI   | NA | Yes | No |
| NA          | NA | NA       | Full Code | NA | No  | NA |
| NA          | NA | NA       | Full Code | NA | No  | NA |
| O POSITIVE  | O  | POSITIVE | DNR/DNI   | NA | No  | NA |
| A POSITIVE  | A  | POSITIVE | DNR/DNI   | NA | No  | NA |
| NA          | NA | NA       | Full Code | NA | No  | NA |
| NA          | NA | NA       | DNR/DNI   | NA | No  | NA |
| NA          | NA | NA       | Full Code | NA | No  | NA |
| NA          | NA | NA       | Full Code | No | No  | NA |
| NA          | NA | NA       | Full Code | No | No  | NA |
| NA          | NA | NA       | Full Code | NA | No  | NA |
| A NEGATIVE  | A  | NEGATIVE | Full Code | NA | No  | NA |
| A NEGATIVE  | A  | NEGATIVE | Full Code | NA | No  | NA |
| B POSITIVE  | B  | POSITIVE | DNR/DNI   | No | No  | NA |
| A POSITIVE  | A  | POSITIVE | DNR/DNI   | No | No  | NA |
| O POSITIVE  | O  | POSITIVE | Full Code | No | No  | NA |
| B POSITIVE  | B  | POSITIVE | Full Code | NA | No  | NA |
| NA          | NA | NA       | Full Code | No | No  | NA |
| O POSITIVE  | O  | POSITIVE | Full Code | No | No  | NA |
| A POSITIVE  | A  | POSITIVE | DNR       | NA | No  | NA |
| NA          | NA | NA       | Full Code | No | No  | NA |
| B POSITIVE  | B  | POSITIVE | Full Code | No | No  | NA |
| NA          | NA | NA       | Full Code | NA | Yes | No |
| NA          | NA | NA       | Full Code | NA | No  | NA |
| O POSITIVE  | O  | POSITIVE | DNR/DNI   | No | No  | NA |
| A POSITIVE  | A  | POSITIVE | Full Code | No | No  | NA |
| NA          | NA | NA       | Full Code | No | No  | NA |
| NA          | NA | NA       | Full Code | No | No  | NA |
| NA          | NA | NA       | DNR/DNI   | No | Yes | No |
| O POSITIVE  | O  | POSITIVE | Full Code | NA | No  | NA |
| NA          | NA | NA       | Full Code | NA | No  | NA |
| O POSITIVE  | O  | POSITIVE | Full Code | NA | No  | NA |
| O POSITIVE  | O  | POSITIVE | Full Code | No | No  | NA |
| NA          | NA | NA       | Full Code | NA | No  | NA |
| O NEGATIVE  | O  | NEGATIVE | DNR/DNI   | NA | Yes | No |

|            |    |          |           |    |     |    |
|------------|----|----------|-----------|----|-----|----|
| NA         | NA | NA       | Full Code | No | No  | NA |
| NA         | NA | NA       | Full Code | NA | No  | NA |
| O NEGATIVE | O  | NEGATIVE | Full Code | No | No  | NA |
| NA         | NA | NA       | DNR/DNI   | NA | No  | NA |
| O POSITIVE | O  | POSITIVE | Full Code | NA | No  | NA |
| O POSITIVE | O  | POSITIVE | DNR/DNI   | NA | No  | NA |
| A POSITIVE | A  | POSITIVE | Full Code | NA | No  | NA |
| O POSITIVE | O  | POSITIVE | DNR       | NA | No  | NA |
| B POSITIVE | B  | POSITIVE | Full Code | No | No  | NA |
| NA         | NA | NA       | Full Code | No | No  | NA |
| NA         | NA | NA       | DNR/DNI   | No | No  | NA |
| NA         | NA | NA       | Full Code | NA | No  | NA |
| NA         | NA | NA       | Full Code | No | No  | NA |
| NA         | NA | NA       | Full Code | NA | No  | NA |
| A POSITIVE | A  | POSITIVE | DNR/DNI   | NA | No  | NA |
| NA         | NA | NA       | Full Code | NA | No  | NA |
| B POSITIVE | B  | POSITIVE | DNR/DNI   | NA | Yes | No |
| A POSITIVE | A  | POSITIVE | DNR/DNI   | No | No  | NA |
| NA         | NA | NA       | Full Code | NA | No  | NA |
| NA         | NA | NA       | Full Code | NA | No  | NA |
| NA         | NA | NA       | Full Code | NA | No  | NA |
| A POSITIVE | A  | POSITIVE | Full Code | No | No  | NA |
| A POSITIVE | A  | POSITIVE | Full Code | No | No  | NA |
| O POSITIVE | O  | POSITIVE | DNR       | No | Yes | No |
| A POSITIVE | A  | POSITIVE | Full Code | No | No  | NA |
| O POSITIVE | O  | POSITIVE | DNR/DNI   | No | Yes | No |
| B POSITIVE | B  | POSITIVE | Full Code | NA | No  | NA |
| NA         | NA | NA       | DNR/DNI   | NA | No  | NA |
| O POSITIVE | O  | POSITIVE | Full Code | No | No  | NA |
| O POSITIVE | O  | POSITIVE | Full Code | No | No  | NA |
| NA         | NA | NA       | Full Code | NA | No  | NA |
| NA         | NA | NA       | DNR/DNI   | No | No  | NA |
| NA         | NA | NA       | Full Code | No | No  | NA |
| NA         | NA | NA       | NA        | No | No  | NA |
| NA         | NA | NA       | NA        | NA | No  | NA |
| NA         | NA | NA       | Full Code | No | No  | NA |
| A POSITIVE | A  | POSITIVE | Full Code | No | No  | NA |
| O POSITIVE | O  | POSITIVE | Full Code | No | No  | NA |
| O POSITIVE | O  | POSITIVE | Full Code | No | No  | NA |
| NA         | NA | NA       | Full Code | NA | No  | NA |
| NA         | NA | NA       | DNR/DNI   | NA | No  | NA |
| O POSITIVE | O  | POSITIVE | Full Code | No | No  | NA |
| NA         | NA | NA       | Full Code | NA | No  | NA |
| NA         | NA | NA       | Full Code | NA | No  | NA |
| NA         | NA | NA       | Full Code | No | No  | NA |



|             |    |          |           |     |     |     |
|-------------|----|----------|-----------|-----|-----|-----|
| NA          | NA | NA       | Full Code | No  | No  | NA  |
| O POSITIVE  | O  | POSITIVE | NA        | NA  | No  | NA  |
| O NEGATIVE  | O  | NEGATIVE | DNR/DNI   | NA  | Yes | No  |
| NA          | NA | NA       | Full Code | No  | No  | NA  |
| NA          | NA | NA       | DNR/DNI   | No  | No  | NA  |
| O POSITIVE  | O  | POSITIVE | DNR/DNI   | No  | Yes | No  |
| NA          | NA | NA       | Full Code | NA  | No  | NA  |
| NA          | NA | NA       | Full Code | No  | Yes | No  |
| NA          | NA | NA       | Full Code | NA  | No  | NA  |
| AB POSITIVE | AB | POSITIVE | Full Code | NA  | No  | NA  |
| AB POSITIVE | AB | POSITIVE | Full Code | NA  | No  | NA  |
| NA          | NA | NA       | Full Code | No  | No  | NA  |
| O POSITIVE  | O  | POSITIVE | Full Code | NA  | No  | NA  |
| NA          | NA | NA       | Full Code | NA  | No  | NA  |
| O POSITIVE  | O  | POSITIVE | Full Code | Yes | No  | NA  |
| A POSITIVE  | A  | POSITIVE | Full Code | NA  | No  | NA  |
| NA          | NA | NA       | Full Code | No  | No  | NA  |
| A POSITIVE  | A  | POSITIVE | Full Code | No  | Yes | Yes |
| B POSITIVE  | B  | POSITIVE | Full Code | No  | No  | NA  |
| NA          | NA | NA       | DNR/DNI   | No  | No  | NA  |
| NA          | NA | NA       | Full Code | NA  | No  | NA  |
| NA          | NA | NA       | Full Code | NA  | No  | NA  |
| NA          | NA | NA       | Full Code | NA  | No  | NA  |
| O POSITIVE  | O  | POSITIVE | Full Code | No  | No  | NA  |
| NA          | NA | NA       | Full Code | NA  | No  | NA  |
| A POSITIVE  | A  | POSITIVE | Full Code | No  | No  | NA  |
| A POSITIVE  | A  | POSITIVE | DNR       | No  | No  | NA  |
| NA          | NA | NA       | Full Code | NA  | No  | NA  |
| NA          | NA | NA       | Full Code | No  | No  | NA  |
| O POSITIVE  | O  | POSITIVE | DNR/DNI   | NA  | No  | NA  |
| NA          | NA | NA       | Full Code | No  | No  | NA  |
| NA          | NA | NA       | Full Code | NA  | No  | NA  |
| B POSITIVE  | B  | POSITIVE | DNR/DNI   | NA  | No  | NA  |
| A POSITIVE  | A  | POSITIVE | Full Code | NA  | Yes | Yes |
| B POSITIVE  | B  | POSITIVE | Full Code | No  | Yes | Yes |
| A NEGATIVE  | A  | NEGATIVE | DNR/DNI   | No  | No  | NA  |
| NA          | NA | NA       | Full Code | NA  | No  | NA  |
| A NEGATIVE  | A  | NEGATIVE | Full Code | No  | Yes | No  |
| O POSITIVE  | O  | POSITIVE | Full Code | NA  | No  | NA  |
| NA          | NA | NA       | Full Code | No  | No  | NA  |
| NA          | NA | NA       | Full Code | NA  | No  | NA  |
| O POSITIVE  | O  | POSITIVE | Full Code | NA  | Yes | No  |
| O POSITIVE  | O  | POSITIVE | DNR/DNI   | No  | No  | NA  |
| NA          | NA | NA       | Full Code | No  | Yes | No  |
| O POSITIVE  | O  | POSITIVE | Full Code | NA  | No  | NA  |

|             |    |          |           |     |     |     |
|-------------|----|----------|-----------|-----|-----|-----|
| NA          | NA | NA       | Full Code | NA  | No  | NA  |
| A POSITIVE  | A  | POSITIVE | Full Code | NA  | No  | NA  |
| NA          | NA | NA       | Full Code | No  | Yes | No  |
| O POSITIVE  | O  | POSITIVE | Full Code | NA  | No  | NA  |
| A POSITIVE  | A  | POSITIVE | Full Code | NA  | Yes | No  |
| O POSITIVE  | O  | POSITIVE | Full Code | NA  | Yes | Yes |
| AB POSITIVE | AB | POSITIVE | Full Code | No  | Yes | No  |
| NA          | NA | NA       | Full Code | No  | No  | NA  |
| NA          | NA | NA       | Full Code | No  | No  | NA  |
| O POSITIVE  | O  | POSITIVE | DNR/DNI   | No  | No  | NA  |
| NA          | NA | NA       | Full Code | NA  | No  | NA  |
| O POSITIVE  | O  | POSITIVE | DNR/DNI   | No  | No  | NA  |
| NA          | NA | NA       | DNR/DNI   | No  | No  | NA  |
| NA          | NA | NA       | Full Code | NA  | No  | NA  |
| NA          | NA | NA       | Full Code | NA  | No  | NA  |
| A POSITIVE  | A  | POSITIVE | DNR/DNI   | No  | Yes | No  |
| O POSITIVE  | O  | POSITIVE | DNR/DNI   | NA  | No  | NA  |
| O POSITIVE  | O  | POSITIVE | DNR/DNI   | NA  | No  | NA  |
| A POSITIVE  | A  | POSITIVE | DNR/DNI   | No  | Yes | No  |
| A POSITIVE  | A  | POSITIVE | Full Code | No  | Yes | No  |
| NA          | NA | NA       | DNR/DNI   | No  | No  | NA  |
| O POSITIVE  | O  | POSITIVE | Full Code | No  | No  | NA  |
| B POSITIVE  | B  | POSITIVE | DNR/DNI   | No  | No  | NA  |
| NA          | NA | NA       | Full Code | NA  | No  | NA  |
| NA          | NA | NA       | DNR/DNI   | No  | No  | NA  |
| NA          | NA | NA       | NA        | No  | No  | NA  |
| A POSITIVE  | A  | POSITIVE | DNR/DNI   | NA  | No  | NA  |
| NA          | NA | NA       | Full Code | No  | No  | NA  |
| B POSITIVE  | B  | POSITIVE | DNR       | No  | No  | NA  |
| O POSITIVE  | O  | POSITIVE | Full Code | NA  | No  | NA  |
| O POSITIVE  | O  | POSITIVE | Full Code | No  | No  | NA  |
| NA          | NA | NA       | Full Code | NA  | No  | NA  |
| NA          | NA | NA       | Full Code | No  | No  | NA  |
| O POSITIVE  | O  | POSITIVE | Full Code | Yes | No  | NA  |
| NA          | NA | NA       | DNR       | No  | No  | NA  |
| NA          | NA | NA       | Full Code | NA  | No  | NA  |
| A POSITIVE  | A  | POSITIVE | Full Code | NA  | No  | NA  |
| O NEGATIVE  | O  | NEGATIVE | DNR/DNI   | NA  | No  | NA  |
| A POSITIVE  | A  | POSITIVE | DNR       | NA  | No  | NA  |
| A POSITIVE  | A  | POSITIVE | DNR/DNI   | No  | No  | NA  |
| NA          | NA | NA       | Full Code | NA  | No  | NA  |
| NA          | NA | NA       | Full Code | NA  | No  | NA  |
| NA          | NA | NA       | Full Code | NA  | No  | NA  |
| O POSITIVE  | O  | POSITIVE | DNR/DNI   | No  | No  | NA  |
| O POSITIVE  | O  | POSITIVE | Full Code | NA  | No  | NA  |

|             |    |          |           |     |     |    |
|-------------|----|----------|-----------|-----|-----|----|
| B POSITIVE  | B  | POSITIVE | DNR/DNI   | No  | No  | NA |
| O POSITIVE  | O  | POSITIVE | DNR/DNI   | No  | Yes | No |
| NA          | NA | NA       | DNR/DNI   | No  | No  | NA |
| A POSITIVE  | A  | POSITIVE | DNR/DNI   | No  | No  | NA |
| A NEGATIVE  | B  | NEGATIVE | DNR/DNI   | No  | Yes | No |
| A POSITIVE  | A  | POSITIVE | Full Code | No  | No  | NA |
| A POSITIVE  | A  | POSITIVE | DNR/DNI   | No  | No  | NA |
| NA          | NA | NA       | DNR       | No  | No  | NA |
| NA          | NA | NA       | Full Code | NA  | No  | NA |
| NA          | NA | NA       | DNR/DNI   | No  | No  | NA |
| AB POSITIVE | AB | POSITIVE | Full Code | No  | No  | NA |
| NA          | NA | NA       | DNR/DNI   | No  | No  | NA |
| B POSITIVE  | B  | POSITIVE | Full Code | No  | No  | NA |
| NA          | NA | NA       | Full Code | NA  | No  | NA |
| NA          | NA | NA       | Full Code | No  | No  | NA |
| O POSITIVE  | O  | POSITIVE | Full Code | NA  | Yes | No |
| O POSITIVE  | O  | POSITIVE | Full Code | Yes | No  | NA |
| NA          | NA | NA       | DNR       | NA  | No  | NA |
| O POSITIVE  | O  | POSITIVE | DNR       | No  | No  | NA |
| O POSITIVE  | O  | POSITIVE | DNR/DNI   | No  | No  | NA |
| NA          | NA | NA       | Full Code | NA  | No  | NA |
| A POSITIVE  | A  | POSITIVE | NA        | NA  | No  | NA |
| O POSITIVE  | O  | POSITIVE | DNR/DNI   | No  | No  | NA |
| O POSITIVE  | O  | POSITIVE | DNR/DNI   | No  | No  | NA |
| NA          | NA | NA       | Full Code | No  | Yes | No |
| O POSITIVE  | O  | POSITIVE | Full Code | No  | No  | NA |
| A POSITIVE  | A  | POSITIVE | Full Code | NA  | No  | NA |
| NA          | NA | NA       | DNR/DNI   | NA  | Yes | No |
| NA          | NA | NA       | Full Code | NA  | No  | NA |
| NA          | NA | NA       | Full Code | No  | No  | NA |
| NA          | NA | NA       | Full Code | No  | No  | NA |
| NA          | NA | NA       | Full Code | NA  | No  | NA |
| NA          | NA | NA       | Full Code | NA  | No  | NA |
| A NEGATIVE  | A  | NEGATIVE | Full Code | NA  | Yes | No |
| B POSITIVE  | B  | POSITIVE | Full Code | NA  | No  | NA |
| A POSITIVE  | A  | POSITIVE | Full Code | No  | No  | NA |
| A POSITIVE  | A  | POSITIVE | Full Code | No  | No  | NA |
| A POSITIVE  | A  | POSITIVE | DNR/DNI   | No  | No  | NA |
| A POSITIVE  | A  | POSITIVE | Full Code | NA  | No  | NA |
| NA          | NA | NA       | DNR       | NA  | No  | NA |
| NA          | NA | NA       | Full Code | NA  | No  | NA |
| A POSITIVE  | A  | POSITIVE | Full Code | NA  | No  | NA |
| NA          | NA | NA       | Full Code | No  | No  | NA |
| A POSITIVE  | A  | POSITIVE | DNR/DNI   | No  | No  | NA |
| NA          | NA | NA       | DNR/DNI   | NA  | Yes | No |

|             |    |          |           |    |     |    |
|-------------|----|----------|-----------|----|-----|----|
| O POSITIVE  | O  | POSITIVE | DNR/DNI   | No | No  | NA |
| NA          | NA | NA       | Full Code | NA | No  | NA |
| O POSITIVE  | O  | POSITIVE | Full Code | No | No  | NA |
| O POSITIVE  | O  | POSITIVE | Full Code | No | No  | NA |
| NA          | NA | NA       | DNR       | NA | No  | NA |
| NA          | NA | NA       | Full Code | NA | No  | NA |
| O POSITIVE  | O  | POSITIVE | Full Code | No | No  | NA |
| NA          | NA | NA       | Full Code | No | No  | NA |
| A POSITIVE  | A  | POSITIVE | Full Code | NA | No  | NA |
| NA          | NA | NA       | Full Code | NA | No  | NA |
| O POSITIVE  | O  | POSITIVE | Full Code | NA | No  | NA |
| NA          | NA | NA       | Full Code | No | No  | NA |
| A POSITIVE  | A  | POSITIVE | NA        | NA | No  | NA |
| O POSITIVE  | O  | POSITIVE | Full Code | NA | No  | NA |
| A POSITIVE  | A  | POSITIVE | Full Code | NA | No  | NA |
| A POSITIVE  | A  | POSITIVE | Full Code | NA | No  | NA |
| A POSITIVE  | A  | POSITIVE | Full Code | NA | No  | NA |
| AB POSITIVE | AB | POSITIVE | Full Code | No | No  | NA |
| NA          | NA | NA       | Full Code | No | No  | NA |
| NA          | NA | NA       | DNR/DNI   | NA | Yes | No |
| NA          | NA | NA       | DNR/DNI   | NA | No  | NA |
| B POSITIVE  | B  | POSITIVE | Full Code | No | No  | NA |
| A POSITIVE  | A  | POSITIVE | Full Code | No | No  | NA |
| NA          | NA | NA       | DNR/DNI   | NA | No  | NA |
| NA          | NA | NA       | Full Code | NA | No  | NA |
| NA          | NA | NA       | Full Code | NA | Yes | No |
| NA          | NA | NA       | Full Code | No | No  | NA |
| NA          | NA | NA       | Full Code | No | No  | NA |
| A POSITIVE  | A  | POSITIVE | Full Code | No | Yes | No |
| B POSITIVE  | B  | POSITIVE | DNR/DNI   | No | Yes | No |
| O POSITIVE  | O  | POSITIVE | Full Code | No | No  | NA |
| A POSITIVE  | A  | POSITIVE | DNR/DNI   | No | No  | NA |
| O POSITIVE  | O  | POSITIVE | Full Code | No | No  | NA |
| O POSITIVE  | O  | POSITIVE | Full Code | No | No  | NA |
| O POSITIVE  | O  | POSITIVE | Full Code | No | No  | NA |
| NA          | NA | NA       | Full Code | NA | No  | NA |
| O POSITIVE  | O  | POSITIVE | Full Code | NA | No  | NA |
| NA          | NA | NA       | Full Code | NA | No  | NA |
| O POSITIVE  | O  | POSITIVE | DNR/DNI   | No | No  | NA |
| NA          | NA | NA       | DNR/DNI   | NA | No  | NA |
| NA          | NA | NA       | Full Code | No | No  | NA |
| B POSITIVE  | B  | POSITIVE | DNR/DNI   | No | No  | NA |
| A POSITIVE  | A  | POSITIVE | Full Code | No | No  | NA |
| A POSITIVE  | A  | POSITIVE | Full Code | No | No  | NA |
| NA          | NA | NA       | Full Code | NA | Yes | No |

|            |    |          |           |     |     |    |
|------------|----|----------|-----------|-----|-----|----|
| NA         | NA | NA       | Full Code | No  | No  | NA |
| NA         | NA | NA       | Full Code | NA  | No  | NA |
| NA         | NA | NA       | Full Code | NA  | No  | NA |
| NA         | NA | NA       | Full Code | NA  | No  | NA |
| NA         | NA | NA       | Full Code | No  | No  | NA |
| NA         | NA | NA       | Full Code | No  | No  | NA |
| NA         | NA | NA       | Full Code | No  | No  | NA |
| A POSITIVE | A  | POSITIVE | DNR/DNI   | NA  | No  | NA |
| B POSITIVE | B  | POSITIVE | Full Code | No  | No  | NA |
| B POSITIVE | B  | POSITIVE | Full Code | No  | No  | NA |
| B POSITIVE | B  | POSITIVE | DNR/DNI   | NA  | No  | NA |
| NA         | NA | NA       | Full Code | NA  | No  | NA |
| NA         | NA | NA       | Full Code | NA  | No  | NA |
| O POSITIVE | O  | POSITIVE | NA        | No  | No  | NA |
| B POSITIVE | B  | POSITIVE | DNR       | NA  | No  | NA |
| B POSITIVE | B  | POSITIVE | Full Code | Yes | No  | NA |
| NA         | NA | NA       | DNR/DNI   | NA  | No  | NA |
| O POSITIVE | O  | POSITIVE | DNR/DNI   | NA  | No  | NA |
| A POSITIVE | A  | POSITIVE | Full Code | No  | Yes | No |
| A POSITIVE | A  | POSITIVE | DNR/DNI   | NA  | No  | NA |
| A POSITIVE | A  | POSITIVE | DNR       | NA  | Yes | No |
| O POSITIVE | O  | POSITIVE | Full Code | NA  | No  | NA |
| NA         | NA | NA       | Full Code | NA  | No  | NA |
| O POSITIVE | O  | POSITIVE | Full Code | NA  | No  | NA |
| NA         | NA | NA       | Full Code | NA  | No  | NA |
| O POSITIVE | O  | POSITIVE | Full Code | No  | No  | NA |
| NA         | NA | NA       | DNR/DNI   | No  | No  | NA |
| NA         | NA | NA       | DNR/DNI   | NA  | No  | NA |
| NA         | NA | NA       | Full Code | NA  | No  | NA |
| NA         | NA | NA       | DNR/DNI   | NA  | No  | NA |
| A POSITIVE | A  | POSITIVE | DNR/DNI   | NA  | No  | NA |
| A POSITIVE | A  | POSITIVE | DNR/DNI   | NA  | No  | NA |
| O POSITIVE | O  | POSITIVE | Full Code | No  | No  | NA |
| B POSITIVE | B  | POSITIVE | Full Code | Yes | No  | NA |
| B POSITIVE | B  | POSITIVE | Full Code | Yes | No  | NA |
| O POSITIVE | O  | POSITIVE | DNR/DNI   | No  | No  | NA |
| NA         | NA | NA       | Full Code | No  | No  | NA |
| NA         | NA | NA       | Full Code | NA  | No  | NA |
| NA         | NA | NA       | DNR/DNI   | No  | No  | NA |
| NA         | NA | NA       | Full Code | Yes | No  | NA |
| NA         | NA | NA       | DNR/DNI   | NA  | No  | NA |
| NA         | NA | NA       | Full Code | NA  | No  | NA |
| NA         | NA | NA       | Full Code | NA  | No  | NA |
| NA         | NA | NA       | Full Code | No  | No  | NA |
| NA         | NA | NA       | Full Code | No  | No  | NA |

|            |    |          |           |    |     |     |
|------------|----|----------|-----------|----|-----|-----|
| NA         | NA | NA       | Full Code | NA | No  | NA  |
| O POSITIVE | O  | POSITIVE | DNR/DNI   | No | No  | NA  |
| A POSITIVE | A  | POSITIVE | DNR       | NA | No  | NA  |
| O POSITIVE | O  | POSITIVE | Full Code | No | No  | NA  |
| NA         | NA | NA       | Full Code | NA | No  | NA  |
| NA         | NA | NA       | Full Code | NA | No  | NA  |
| NA         | NA | NA       | Full Code | NA | No  | NA  |
| NA         | NA | NA       | Full Code | NA | No  | NA  |
| NA         | NA | NA       | DNR/DNI   | NA | No  | NA  |
| A POSITIVE | A  | POSITIVE | Full Code | No | No  | NA  |
| NA         | NA | NA       | DNR/DNI   | No | No  | NA  |
| O POSITIVE | O  | POSITIVE | Full Code | NA | Yes | Yes |
| O POSITIVE | O  | POSITIVE | DNR       | NA | Yes | Yes |
| NA         | NA | NA       | Full Code | NA | No  | NA  |
| NA         | NA | NA       | DNR/DNI   | No | No  | NA  |
| NA         | NA | NA       | Full Code | NA | No  | NA  |
| NA         | NA | NA       | Full Code | NA | No  | NA  |
| O NEGATIVE | O  | NEGATIVE | Full Code | No | No  | NA  |
| NA         | NA | NA       | Full Code | No | No  | NA  |
| O POSITIVE | O  | POSITIVE | DNR/DNI   | No | No  | NA  |
| O POSITIVE | O  | POSITIVE | DNR/DNI   | NA | No  | NA  |
| NA         | NA | NA       | Full Code | NA | No  | NA  |
| NA         | NA | NA       | Full Code | No | No  | NA  |
| NA         | NA | NA       | Full Code | NA | No  | NA  |
| NA         | NA | NA       | Full Code | NA | No  | NA  |
| NA         | NA | NA       | Full Code | NA | No  | NA  |
| O POSITIVE | O  | POSITIVE | DNR/DNI   | No | No  | NA  |
| O POSITIVE | O  | POSITIVE | Full Code | NA | No  | NA  |
| NA         | NA | NA       | Full Code | No | No  | NA  |
| O POSITIVE | O  | POSITIVE | DNR/DNI   | No | No  | NA  |
| NA         | NA | NA       | DNR/DNI   | NA | No  | NA  |
| NA         | NA | NA       | DNR/DNI   | NA | No  | NA  |
| B POSITIVE | B  | POSITIVE | Full Code | No | Yes | No  |
| NA         | NA | NA       | Full Code | NA | No  | NA  |
| NA         | NA | NA       | Full Code | No | No  | NA  |
| NA         | NA | NA       | Full Code | No | No  | NA  |
| NA         | NA | NA       | DNR/DNI   | No | No  | NA  |
| B POSITIVE | B  | POSITIVE | Full Code | No | No  | NA  |
| O NEGATIVE | O  | NEGATIVE | DNR/DNI   | No | Yes | NA  |
| NA         | NA | NA       | DNR/DNI   | NA | No  | NA  |
| NA         | NA | NA       | DNR/DNI   | No | No  | NA  |
| NA         | NA | NA       | DNR/DNI   | No | No  | NA  |
| NA         | NA | NA       | DNR/DNI   | No | No  | NA  |
| NA         | NA | NA       | Full Code | NA | No  | NA  |
| NA         | NA | NA       | Full Code | NA | No  | NA  |

|             |    |          |           |     |     |    |
|-------------|----|----------|-----------|-----|-----|----|
| AB POSITIVE | AB | POSITIVE | DNR/DNI   | NA  | No  | NA |
| NA          | NA | NA       | Full Code | NA  | No  | NA |
| AB POSITIVE | AB | POSITIVE | Full Code | NA  | No  | NA |
| A POSITIVE  | A  | POSITIVE | DNR/DNI   | NA  | Yes | No |
| A POSITIVE  | A  | POSITIVE | DNR/DNI   | NA  | Yes | No |
| B POSITIVE  | B  | POSITIVE | Full Code | NA  | No  | NA |
| O POSITIVE  | O  | POSITIVE | DNR/DNI   | NA  | No  | NA |
| A POSITIVE  | A  | POSITIVE | DNR/DNI   | No  | No  | NA |
| NA          | NA | NA       | Full Code | NA  | No  | NA |
| NA          | NA | NA       | DNR/DNI   | No  | No  | NA |
| O POSITIVE  | O  | POSITIVE | Full Code | NA  | No  | NA |
| NA          | NA | NA       | Full Code | No  | No  | NA |
| O POSITIVE  | O  | POSITIVE | Full Code | No  | Yes | No |
| NA          | NA | NA       | DNR/DNI   | No  | No  | NA |
| NA          | NA | NA       | Full Code | NA  | No  | NA |
| O POSITIVE  | O  | POSITIVE | DNR/DNI   | No  | No  | NA |
| A POSITIVE  | A  | POSITIVE | DNR/DNI   | NA  | Yes | No |
| NA          | NA | NA       | Full Code | No  | No  | NA |
| O POSITIVE  | O  | POSITIVE | Full Code | No  | No  | NA |
| NA          | NA | NA       | Full Code | No  | No  | NA |
| O POSITIVE  | O  | POSITIVE | Full Code | No  | Yes | No |
| O POSITIVE  | O  | POSITIVE | DNR/DNI   | NA  | Yes | No |
| NA          | NA | NA       | Full Code | No  | No  | NA |
| A POSITIVE  | A  | POSITIVE | Full Code | Yes | No  | NA |
| O POSITIVE  | O  | POSITIVE | Full Code | NA  | No  | NA |
| O POSITIVE  | O  | POSITIVE | Full Code | NA  | No  | NA |
| B POSITIVE  | B  | POSITIVE | DNR/DNI   | No  | No  | NA |
| B POSITIVE  | B  | POSITIVE | Full Code | NA  | No  | NA |
| NA          | NA | NA       | Full Code | No  | No  | NA |
| NA          | NA | NA       | Full Code | NA  | No  | NA |
| O POSITIVE  | O  | POSITIVE | Full Code | No  | Yes | No |
| NA          | NA | NA       | Full Code | NA  | No  | NA |
| NA          | NA | NA       | Full Code | No  | Yes | No |
| O POSITIVE  | O  | POSITIVE | Full Code | Yes | No  | NA |
| NA          | NA | NA       | DNR/DNI   | No  | Yes | No |
| O POSITIVE  | O  | POSITIVE | Full Code | No  | No  | NA |
| O POSITIVE  | O  | POSITIVE | DNR       | No  | Yes | No |
| NA          | NA | NA       | DNR/DNI   | No  | No  | NA |
| O POSITIVE  | O  | POSITIVE | DNR/DNI   | No  | No  | NA |
| O POSITIVE  | O  | POSITIVE | DNR/DNI   | No  | No  | NA |
| NA          | NA | NA       | Full Code | No  | No  | NA |
| NA          | NA | NA       | Full Code | No  | No  | NA |
| NA          | NA | NA       | Full Code | No  | No  | NA |
| NA          | NA | NA       | Full Code | No  | No  | NA |
| A POSITIVE  | A  | POSITIVE | Full Code | NA  | No  | NA |

|             |    |          |           |    |     |     |
|-------------|----|----------|-----------|----|-----|-----|
| NA          | NA | NA       | Full Code | NA | No  | NA  |
| NA          | NA | NA       | Full Code | No | No  | NA  |
| NA          | NA | NA       | DNR/DNI   | No | No  | NA  |
| NA          | NA | NA       | Full Code | NA | No  | NA  |
| NA          | NA | NA       | DNR       | NA | No  | NA  |
| AB POSITIVE | AB | POSITIVE | DNR/DNI   | No | No  | NA  |
| A POSITIVE  | A  | POSITIVE | DNR/DNI   | NA | No  | NA  |
| O POSITIVE  | O  | POSITIVE | Full Code | NA | No  | NA  |
| A POSITIVE  | A  | POSITIVE | Full Code | NA | No  | NA  |
| O POSITIVE  | O  | POSITIVE | Full Code | NA | No  | NA  |
| NA          | NA | NA       | Full Code | No | Yes | No  |
| NA          | NA | NA       | Full Code | No | No  | NA  |
| O POSITIVE  | O  | POSITIVE | Full Code | NA | No  | NA  |
| NA          | NA | NA       | DNR/DNI   | NA | No  | NA  |
| O POSITIVE  | O  | POSITIVE | Full Code | No | Yes | No  |
| A POSITIVE  | A  | POSITIVE | Full Code | NA | No  | NA  |
| O POSITIVE  | O  | POSITIVE | Full Code | NA | No  | NA  |
| O POSITIVE  | O  | POSITIVE | Full Code | NA | No  | NA  |
| NA          | NA | NA       | DNR/DNI   | No | No  | NA  |
| O POSITIVE  | O  | POSITIVE | Full Code | NA | No  | NA  |
| A POSITIVE  | A  | POSITIVE | DNR       | No | No  | NA  |
| NA          | NA | NA       | Full Code | NA | Yes | No  |
| NA          | NA | NA       | Full Code | NA | No  | NA  |
| A POSITIVE  | A  | POSITIVE | Full Code | NA | No  | NA  |
| A POSITIVE  | A  | POSITIVE | Full Code | NA | No  | NA  |
| A POSITIVE  | A  | POSITIVE | Full Code | NA | Yes | Yes |
| O POSITIVE  | O  | POSITIVE | DNR/DNI   | NA | Yes | No  |
| NA          | NA | NA       | DNR/DNI   | No | No  | NA  |
| O POSITIVE  | O  | POSITIVE | Full Code | No | No  | NA  |
| NA          | NA | NA       | Full Code | No | No  | NA  |
| AB POSITIVE | AB | POSITIVE | Full Code | No | No  | NA  |
| NA          | NA | NA       | Full Code | No | No  | NA  |
| A POSITIVE  | A  | POSITIVE | Full Code | NA | No  | NA  |
| NA          | NA | NA       | DNR       | No | No  | NA  |
| NA          | NA | NA       | DNR       | No | No  | NA  |
| O POSITIVE  | O  | POSITIVE | Full Code | No | Yes | No  |
| O POSITIVE  | O  | POSITIVE | DNR/DNI   | NA | Yes | No  |
| NA          | NA | NA       | DNR/DNI   | NA | No  | NA  |
| NA          | NA | NA       | Full Code | NA | No  | NA  |
| O POSITIVE  | O  | POSITIVE | Full Code | NA | No  | NA  |
| O POSITIVE  | O  | POSITIVE | Full Code | NA | No  | NA  |
| NA          | NA | NA       | DNR/DNI   | No | No  | NA  |
| A POSITIVE  | A  | POSITIVE | DNR/DNI   | NA | No  | NA  |
| A NEGATIVE  | A  | NEGATIVE | Full Code | No | Yes | No  |
| NA          | NA | NA       | DNR/DNI   | No | No  | NA  |



|            |    |          |           |    |     |    |
|------------|----|----------|-----------|----|-----|----|
| O POSITIVE | O  | POSITIVE | DNR/DNI   | No | No  | NA |
| NA         | NA | NA       | Full Code | No | No  | NA |
| NA         | NA | NA       | Full Code | No | No  | NA |
| NA         | NA | NA       | Full Code | NA | No  | NA |
| NA         | NA | NA       | DNR/DNI   | No | No  | NA |
| O POSITIVE | O  | POSITIVE | DNR/DNI   | NA | No  | NA |
| A POSITIVE | A  | POSITIVE | Full Code | No | No  | NA |
| O NEGATIVE | O  | NEGATIVE | Full Code | No | No  | NA |
| NA         | NA | NA       | Full Code | NA | No  | NA |
| O POSITIVE | O  | POSITIVE | DNR/DNI   | NA | No  | NA |
| O POSITIVE | O  | POSITIVE | Full Code | No | No  | NA |
| NA         | NA | NA       | Full Code | No | No  | NA |
| O POSITIVE | O  | POSITIVE | Full Code | NA | Yes | No |
| O POSITIVE | O  | POSITIVE | Full Code | NA | No  | NA |
| A POSITIVE | A  | POSITIVE | DNR/DNI   | NA | Yes | No |
| NA         | NA | NA       | DNR/DNI   | No | No  | NA |
| NA         | NA | NA       | DNR       | NA | No  | NA |
| NA         | NA | NA       | Full Code | No | No  | NA |
| A POSITIVE | A  | POSITIVE | DNR       | No | No  | NA |
| A POSITIVE | A  | POSITIVE | Full Code | NA | No  | NA |
| B POSITIVE | B  | POSITIVE | Full Code | No | No  | NA |
| NA         | NA | NA       | Full Code | NA | No  | NA |
| NA         | NA | NA       | Full Code | No | No  | NA |
| NA         | NA | NA       | DNR/DNI   | No | No  | NA |
| O POSITIVE | O  | POSITIVE | Full Code | NA | No  | NA |
| NA         | NA | NA       | Full Code | NA | No  | NA |
| B POSITIVE | B  | POSITIVE | Full Code | NA | No  | NA |
| B POSITIVE | B  | POSITIVE | Full Code | No | No  | NA |
| A POSITIVE | A  | POSITIVE | Full Code | NA | No  | NA |
| O POSITIVE | O  | POSITIVE | DNR/DNI   | No | Yes | No |
| O POSITIVE | O  | POSITIVE | DNR/DNI   | NA | Yes | No |
| NA         | NA | NA       | Full Code | NA | No  | NA |
| O POSITIVE | O  | POSITIVE | Full Code | NA | No  | NA |
| O POSITIVE | O  | POSITIVE | DNR/DNI   | NA | No  | NA |
| NA         | NA | NA       | DNR       | No | No  | NA |
| O NEGATIVE | O  | NEGATIVE | Full Code | No | Yes | No |
| O NEGATIVE | O  | NEGATIVE | Full Code | No | Yes | No |
| NA         | NA | NA       | Full Code | NA | No  | NA |
| A POSITIVE | A  | POSITIVE | Full Code | NA | No  | NA |
| O POSITIVE | O  | POSITIVE | DNR       | NA | No  | NA |
| O POSITIVE | O  | POSITIVE | Full Code | No | No  | NA |
| NA         | NA | NA       | Full Code | NA | No  | NA |
| B POSITIVE | B  | POSITIVE | Full Code | NA | No  | NA |
| B POSITIVE | B  | POSITIVE | DNR/DNI   | NA | No  | NA |
| NA         | NA | NA       | Full Code | NA | No  | NA |

|            |    |          |           |     |     |     |
|------------|----|----------|-----------|-----|-----|-----|
| A POSITIVE | A  | POSITIVE | DNR/DNI   | No  | No  | NA  |
| O POSITIVE | O  | POSITIVE | Full Code | No  | Yes | Yes |
| O POSITIVE | O  | POSITIVE | Full Code | No  | Yes | Yes |
| A POSITIVE | A  | POSITIVE | DNR/DNI   | NA  | No  | NA  |
| B POSITIVE | B  | POSITIVE | DNR/DNI   | No  | No  | NA  |
| O POSITIVE | O  | POSITIVE | DNR/DNI   | NA  | No  | NA  |
| NA         | NA | NA       | DNR       | NA  | No  | NA  |
| O POSITIVE | O  | POSITIVE | DNR/DNI   | No  | No  | NA  |
| NA         | NA | NA       | Full Code | NA  | No  | NA  |
| B POSITIVE | B  | POSITIVE | DNR/DNI   | NA  | No  | NA  |
| NA         | NA | NA       | DNR/DNI   | NA  | Yes | No  |
| NA         | NA | NA       | Full Code | NA  | No  | NA  |
| A POSITIVE | A  | POSITIVE | Full Code | Yes | No  | NA  |
| NA         | NA | NA       | Full Code | No  | No  | NA  |
| A POSITIVE | A  | POSITIVE | DNR/DNI   | No  | Yes | No  |
| A NEGATIVE | A  | NEGATIVE | DNR/DNI   | NA  | No  | NA  |
| O POSITIVE | O  | POSITIVE | DNR/DNI   | No  | No  | NA  |
| B POSITIVE | B  | POSITIVE | DNR/DNI   | NA  | No  | NA  |
| A POSITIVE | A  | POSITIVE | Full Code | No  | No  | NA  |
| NA         | NA | NA       | Full Code | NA  | No  | NA  |
| A POSITIVE | A  | POSITIVE | Full Code | No  | No  | NA  |
| NA         | NA | NA       | DNR       | NA  | Yes | No  |
| NA         | NA | NA       | Full Code | No  | No  | NA  |
| NA         | NA | NA       | Full Code | NA  | Yes | No  |
| A NEGATIVE | A  | NEGATIVE | DNR/DNI   | No  | No  | NA  |
| O POSITIVE | O  | POSITIVE | Full Code | Yes | No  | NA  |
| O POSITIVE | O  | POSITIVE | Full Code | NA  | No  | NA  |
| NA         | NA | NA       | Full Code | NA  | No  | NA  |
| NA         | NA | NA       | DNR/DNI   | No  | No  | NA  |
| NA         | NA | NA       | Full Code | NA  | No  | NA  |
| NA         | NA | NA       | Full Code | No  | No  | NA  |
| NA         | NA | NA       | Full Code | NA  | No  | NA  |
| NA         | NA | NA       | Full Code | NA  | No  | NA  |
| O POSITIVE | O  | POSITIVE | Full Code | No  | Yes | No  |
| NA         | NA | NA       | Full Code | NA  | No  | NA  |
| O POSITIVE | O  | POSITIVE | Full Code | NA  | No  | NA  |
| A POSITIVE | A  | POSITIVE | Full Code | NA  | No  | NA  |
| NA         | NA | NA       | Full Code | NA  | No  | NA  |
| NA         | NA | NA       | Full Code | NA  | No  | NA  |
| NA         | NA | NA       | Full Code | NA  | No  | NA  |
| NA         | NA | NA       | Full Code | NA  | No  | NA  |
| O POSITIVE | O  | POSITIVE | Full Code | No  | No  | NA  |
| O POSITIVE | O  | POSITIVE | DNR       | NA  | No  | NA  |
| NA         | NA | NA       | Full Code | No  | No  | NA  |
| NA         | NA | NA       | Full Code | NA  | No  | NA  |
| B POSITIVE | B  | POSITIVE | DNR/DNI   | No  | No  | NA  |

|             |    |          |           |    |     |    |
|-------------|----|----------|-----------|----|-----|----|
| O POSITIVE  | O  | POSITIVE | Full Code | NA | No  | NA |
| A POSITIVE  | A  | POSITIVE | DNR/DNI   | NA | Yes | No |
| O POSITIVE  | O  | POSITIVE | DNR/DNI   | No | No  | NA |
| NA          | NA | NA       | Full Code | NA | No  | NA |
| NA          | NA | NA       | Full Code | NA | No  | NA |
| AB POSITIVE | AB | POSITIVE | DNR/DNI   | No | Yes | No |
| O POSITIVE  | O  | POSITIVE | Full Code | NA | No  | NA |
| NA          | NA | NA       | Full Code | NA | No  | NA |
| NA          | NA | NA       | Full Code | NA | No  | NA |
| O POSITIVE  | O  | POSITIVE | DNR/DNI   | No | No  | NA |
| NA          | NA | NA       | Full Code | NA | No  | NA |
| NA          | NA | NA       | Full Code | NA | Yes | No |
| NA          | NA | NA       | DNR       | NA | No  | NA |
| O POSITIVE  | O  | POSITIVE | Full Code | No | No  | NA |
| A NEGATIVE  | B  | NEGATIVE | Full Code | NA | No  | NA |
| B POSITIVE  | B  | POSITIVE | Full Code | No | No  | NA |
| NA          | NA | NA       | DNR/DNI   | NA | No  | NA |
| O POSITIVE  | O  | POSITIVE | Full Code | NA | Yes | No |
| NA          | NA | NA       | Full Code | NA | No  | NA |
| NA          | NA | NA       | Full Code | NA | No  | NA |
| O POSITIVE  | O  | POSITIVE | Full Code | No | Yes | No |
| A POSITIVE  | A  | POSITIVE | Full Code | No | Yes | No |
| NA          | NA | NA       | Full Code | No | No  | NA |
| NA          | NA | NA       | Full Code | NA | No  | NA |
| O POSITIVE  | O  | POSITIVE | Full Code | NA | Yes | No |
| A POSITIVE  | A  | POSITIVE | Full Code | NA | No  | NA |
| O POSITIVE  | O  | POSITIVE | Full Code | NA | No  | NA |
| O POSITIVE  | O  | POSITIVE | Full Code | No | No  | NA |
| O POSITIVE  | O  | POSITIVE | DNR/DNI   | No | No  | NA |
| NA          | NA | NA       | Full Code | No | No  | NA |
| NA          | NA | NA       | DNR       | NA | No  | NA |
| O POSITIVE  | O  | POSITIVE | DNR/DNI   | NA | Yes | No |
| NA          | NA | NA       | Full Code | No | No  | NA |
| A POSITIVE  | A  | POSITIVE | Full Code | NA | No  | NA |
| B POSITIVE  | B  | POSITIVE | Full Code | NA | No  | NA |
| B POSITIVE  | B  | POSITIVE | Full Code | NA | No  | NA |
| NA          | NA | NA       | Full Code | No | No  | NA |
| NA          | NA | NA       | DNR/DNI   | No | Yes | No |
| NA          | NA | NA       | Full Code | NA | No  | NA |
| A POSITIVE  | A  | POSITIVE | Full Code | NA | No  | NA |
| A POSITIVE  | A  | POSITIVE | Full Code | NA | No  | NA |
| O POSITIVE  | O  | POSITIVE | Full Code | No | No  | NA |
| NA          | NA | NA       | DNR/DNI   | No | No  | NA |
| O NEGATIVE  | O  | NEGATIVE | Full Code | NA | No  | NA |
| O NEGATIVE  | O  | NEGATIVE | DNR/DNI   | No | No  | NA |

|            |    |          |           |    |     |     |
|------------|----|----------|-----------|----|-----|-----|
| NA         | NA | NA       | DNR       | NA | No  | NA  |
| O POSITIVE | O  | POSITIVE | DNR/DNI   | NA | Yes | No  |
| A POSITIVE | A  | POSITIVE | Full Code | No | No  | NA  |
| NA         | NA | NA       | Full Code | NA | No  | NA  |
| B POSITIVE | B  | POSITIVE | DNR/DNI   | No | Yes | Yes |
| B POSITIVE | B  | POSITIVE | Full Code | No | Yes | Yes |
| B POSITIVE | B  | POSITIVE | DNR/DNI   | No | Yes | Yes |
| A POSITIVE | A  | POSITIVE | Full Code | NA | No  | NA  |
| NA         | NA | NA       | Full Code | NA | No  | NA  |
| B POSITIVE | B  | POSITIVE | Full Code | No | No  | NA  |
| B POSITIVE | B  | POSITIVE | Full Code | NA | No  | NA  |
| NA         | NA | NA       | Full Code | NA | No  | NA  |
| O POSITIVE | O  | POSITIVE | Full Code | No | No  | NA  |
| NA         | NA | NA       | Full Code | NA | No  | NA  |
| NA         | NA | NA       | Full Code | NA | Yes | No  |
| O NEGATIVE | O  | NEGATIVE | Full Code | No | No  | NA  |
| NA         | NA | NA       | Full Code | No | No  | NA  |
| NA         | NA | NA       | Full Code | NA | No  | NA  |
| O POSITIVE | O  | POSITIVE | DNR/DNI   | No | No  | NA  |
| A POSITIVE | A  | POSITIVE | Full Code | NA | No  | NA  |
| A POSITIVE | A  | POSITIVE | NA        | No | No  | NA  |
| A POSITIVE | A  | POSITIVE | DNR/DNI   | NA | No  | NA  |
| O POSITIVE | O  | POSITIVE | Full Code | NA | No  | NA  |
| NA         | NA | NA       | NA        | No | Yes | No  |
| NA         | NA | NA       | Full Code | NA | Yes | No  |
| NA         | NA | NA       | Full Code | NA | Yes | Yes |
| A POSITIVE | A  | POSITIVE | Full Code | No | No  | NA  |
| B POSITIVE | B  | POSITIVE | Full Code | No | No  | NA  |
| NA         | NA | NA       | DNR       | NA | No  | NA  |
| NA         | NA | NA       | Full Code | NA | No  | NA  |
| O POSITIVE | O  | POSITIVE | DNR/DNI   | No | No  | NA  |
| NA         | NA | NA       | Full Code | NA | No  | NA  |
| A POSITIVE | A  | POSITIVE | DNR/DNI   | NA | Yes | Yes |
| NA         | NA | NA       | DNR/DNI   | No | No  | NA  |
| NA         | NA | NA       | Full Code | No | No  | NA  |
| NA         | NA | NA       | Full Code | No | No  | NA  |
| NA         | NA | NA       | Full Code | No | No  | NA  |
| NA         | NA | NA       | Full Code | NA | No  | NA  |
| NA         | NA | NA       | Full Code | No | No  | NA  |
| A POSITIVE | A  | POSITIVE | Full Code | No | Yes | Yes |
| NA         | NA | NA       | Full Code | No | No  | NA  |
| O POSITIVE | O  | POSITIVE | Full Code | NA | No  | NA  |
| O POSITIVE | O  | POSITIVE | DNR/DNI   | NA | No  | NA  |
| NA         | NA | NA       | DNR/DNI   | NA | No  | NA  |
| NA         | NA | NA       | Full Code | No | No  | NA  |

|             |    |          |           |     |     |     |
|-------------|----|----------|-----------|-----|-----|-----|
| NA          | NA | NA       | Full Code | No  | No  | NA  |
| NA          | NA | NA       | Full Code | No  | No  | NA  |
| NA          | NA | NA       | Full Code | NA  | No  | NA  |
| NA          | NA | NA       | Full Code | NA  | No  | NA  |
| O POSITIVE  | O  | POSITIVE | DNR/DNI   | No  | Yes | No  |
| NA          | NA | NA       | Full Code | NA  | Yes | No  |
| AB POSITIVE | AB | POSITIVE | DNR/DNI   | NA  | No  | NA  |
| A POSITIVE  | A  | POSITIVE | Full Code | No  | No  | NA  |
| NA          | NA | NA       | Full Code | No  | No  | NA  |
| NA          | NA | NA       | Full Code | NA  | No  | NA  |
| O POSITIVE  | O  | POSITIVE | Full Code | NA  | No  | NA  |
| O NEGATIVE  | O  | NEGATIVE | Full Code | NA  | No  | NA  |
| O NEGATIVE  | O  | NEGATIVE | Full Code | NA  | No  | NA  |
| NA          | NA | NA       | Full Code | No  | No  | NA  |
| O POSITIVE  | O  | POSITIVE | Full Code | NA  | No  | NA  |
| O POSITIVE  | O  | POSITIVE | Full Code | NA  | No  | NA  |
| O POSITIVE  | O  | POSITIVE | Full Code | NA  | No  | NA  |
| NA          | NA | NA       | DNR/DNI   | NA  | No  | NA  |
| NA          | NA | NA       | Full Code | NA  | No  | NA  |
| B POSITIVE  | B  | POSITIVE | Full Code | No  | Yes | Yes |
| B POSITIVE  | B  | POSITIVE | Full Code | No  | Yes | No  |
| B POSITIVE  | B  | POSITIVE | DNR/DNI   | No  | No  | NA  |
| NA          | NA | NA       | DNR/DNI   | No  | No  | NA  |
| NA          | NA | NA       | Full Code | NA  | No  | NA  |
| B POSITIVE  | B  | POSITIVE | Full Code | Yes | No  | NA  |
| O NEGATIVE  | O  | NEGATIVE | Full Code | No  | No  | NA  |
| NA          | NA | NA       | DNR/DNI   | No  | Yes | No  |
| A POSITIVE  | A  | POSITIVE | Full Code | NA  | No  | NA  |
| A POSITIVE  | A  | POSITIVE | Full Code | NA  | No  | NA  |
| NA          | NA | NA       | Full Code | NA  | No  | NA  |
| NA          | NA | NA       | Full Code | NA  | No  | NA  |
| A POSITIVE  | A  | POSITIVE | DNR/DNI   | No  | No  | NA  |
| NA          | NA | NA       | Full Code | NA  | No  | NA  |
| NA          | NA | NA       | Full Code | NA  | No  | NA  |
| NA          | NA | NA       | DNR/DNI   | No  | No  | NA  |
| O POSITIVE  | O  | POSITIVE | Full Code | NA  | Yes | No  |
| NA          | NA | NA       | DNR/DNI   | No  | No  | NA  |
| NA          | NA | NA       | Full Code | NA  | No  | NA  |
| A POSITIVE  | A  | POSITIVE | Full Code | NA  | No  | NA  |
| NA          | NA | NA       | Full Code | NA  | No  | NA  |
| O POSITIVE  | O  | POSITIVE | Full Code | No  | No  | NA  |
| A NEGATIVE  | A  | NEGATIVE | Full Code | NA  | No  | NA  |
| A NEGATIVE  | A  | NEGATIVE | Full Code | NA  | No  | NA  |
| A POSITIVE  | A  | POSITIVE | DNR/DNI   | No  | No  | NA  |
| NA          | NA | NA       | Full Code | NA  | No  | NA  |

|            |    |          |           |    |     |     |
|------------|----|----------|-----------|----|-----|-----|
| O POSITIVE | O  | POSITIVE | Full Code | No | No  | NA  |
| A POSITIVE | A  | POSITIVE | Full Code | NA | No  | NA  |
| O POSITIVE | O  | POSITIVE | DNR/DNI   | No | No  | NA  |
| O POSITIVE | O  | POSITIVE | DNR       | NA | Yes | Yes |
| O POSITIVE | O  | POSITIVE | DNR/DNI   | No | No  | NA  |
| NA         | NA | NA       | Full Code | NA | No  | NA  |
| NA         | NA | NA       | DNR/DNI   | NA | No  | NA  |
| A POSITIVE | A  | POSITIVE | Full Code | No | No  | NA  |
| O POSITIVE | O  | POSITIVE | Full Code | NA | No  | NA  |
| A POSITIVE | A  | POSITIVE | DNR/DNI   | NA | No  | NA  |
| NA         | NA | NA       | Full Code | No | Yes | No  |
| NA         | NA | NA       | Full Code | No | No  | NA  |
| NA         | NA | NA       | Full Code | NA | No  | NA  |
| NA         | NA | NA       | Full Code | No | No  | NA  |
| NA         | NA | NA       | Full Code | NA | No  | NA  |
| O POSITIVE | O  | POSITIVE | Full Code | NA | No  | NA  |
| NA         | NA | NA       | DNR/DNI   | NA | No  | NA  |
| O POSITIVE | O  | POSITIVE | Full Code | No | No  | NA  |
| O POSITIVE | O  | POSITIVE | NA        | NA | Yes | No  |
| B POSITIVE | B  | POSITIVE | Full Code | No | No  | NA  |
| A POSITIVE | A  | POSITIVE | DNR       | NA | No  | NA  |
| NA         | NA | NA       | Full Code | NA | No  | NA  |
| B POSITIVE | B  | POSITIVE | DNR/DNI   | NA | Yes | No  |
| A POSITIVE | A  | POSITIVE | Full Code | NA | No  | NA  |
| NA         | NA | NA       | NA        | No | Yes | Yes |
| A POSITIVE | A  | POSITIVE | DNR/DNI   | No | No  | NA  |
| B POSITIVE | B  | POSITIVE | DNR       | NA | No  | NA  |
| A POSITIVE | A  | POSITIVE | DNR/DNI   | NA | No  | NA  |
| A POSITIVE | A  | POSITIVE | Full Code | No | Yes | No  |
| A POSITIVE | A  | POSITIVE | Full Code | No | No  | NA  |
| O POSITIVE | O  | POSITIVE | Full Code | No | No  | NA  |
| NA         | NA | NA       | Full Code | No | No  | NA  |
| B POSITIVE | B  | POSITIVE | Full Code | No | No  | NA  |
| O POSITIVE | O  | POSITIVE | Full Code | No | Yes | No  |
| NA         | NA | NA       | Full Code | NA | No  | NA  |
| O POSITIVE | O  | POSITIVE | Full Code | NA | No  | NA  |
| NA         | NA | NA       | Full Code | No | Yes | No  |
| NA         | NA | NA       | Full Code | No | No  | NA  |
| NA         | NA | NA       | Full Code | NA | No  | NA  |
| O POSITIVE | O  | POSITIVE | Full Code | No | No  | NA  |
| NA         | NA | NA       | DNR/DNI   | No | No  | NA  |
| NA         | NA | NA       | DNR/DNI   | No | No  | NA  |
| NA         | NA | NA       | Full Code | NA | No  | NA  |
| A NEGATIVE | B  | NEGATIVE | Full Code | No | No  | NA  |
| NA         | NA | NA       | DNR/DNI   | No | Yes | No  |

|             |    |          |           |    |     |    |
|-------------|----|----------|-----------|----|-----|----|
| AB POSITIVE | AB | POSITIVE | Full Code | No | Yes | No |
| A POSITIVE  | A  | POSITIVE | Full Code | NA | No  | NA |
| NA          | NA | NA       | Full Code | No | No  | NA |
| NA          | NA | NA       | Full Code | NA | No  | NA |
| O POSITIVE  | O  | POSITIVE | Full Code | NA | No  | NA |
| NA          | NA | NA       | Full Code | NA | No  | NA |
| O POSITIVE  | O  | POSITIVE | DNR/DNI   | No | No  | NA |
| O POSITIVE  | O  | POSITIVE | Full Code | No | No  | NA |
| O POSITIVE  | O  | POSITIVE | Full Code | NA | No  | NA |
| O POSITIVE  | O  | POSITIVE | Full Code | NA | No  | NA |
| A POSITIVE  | A  | POSITIVE | Full Code | No | No  | NA |
| NA          | NA | NA       | Full Code | No | No  | NA |
| O POSITIVE  | O  | POSITIVE | Full Code | No | Yes | No |
| O POSITIVE  | O  | POSITIVE | Full Code | NA | No  | NA |
| NA          | NA | NA       | Full Code | NA | No  | NA |
| NA          | NA | NA       | Full Code | NA | No  | NA |
| NA          | NA | NA       | Full Code | No | No  | NA |
| NA          | NA | NA       | Full Code | NA | No  | NA |
| NA          | NA | NA       | DNR/DNI   | No | No  | NA |
| A POSITIVE  | A  | POSITIVE | Full Code | No | No  | NA |
| NA          | NA | NA       | Full Code | NA | No  | NA |
| NA          | NA | NA       | Full Code | NA | No  | NA |
| NA          | NA | NA       | Full Code | NA | No  | NA |
| O POSITIVE  | O  | POSITIVE | Full Code | No | No  | NA |
| NA          | NA | NA       | Full Code | NA | No  | NA |
| A POSITIVE  | A  | POSITIVE | Full Code | NA | No  | NA |
| A POSITIVE  | A  | POSITIVE | Full Code | NA | No  | NA |
| NA          | NA | NA       | DNR/DNI   | No | No  | NA |
| AB POSITIVE | AB | POSITIVE | Full Code | NA | No  | NA |
| NA          | NA | NA       | Full Code | NA | No  | NA |
| NA          | NA | NA       | Full Code | NA | No  | NA |
| NA          | NA | NA       | Full Code | NA | No  | NA |
| NA          | NA | NA       | Full Code | NA | No  | NA |
| A POSITIVE  | A  | POSITIVE | Full Code | NA | No  | NA |
| A POSITIVE  | A  | POSITIVE | Full Code | No | No  | NA |
| O POSITIVE  | O  | POSITIVE | Full Code | No | No  | NA |
| A POSITIVE  | A  | POSITIVE | Full Code | No | No  | NA |
| O POSITIVE  | O  | POSITIVE | DNR/DNI   | No | No  | NA |
| A POSITIVE  | A  | POSITIVE | Full Code | NA | No  | NA |
| NA          | NA | NA       | Full Code | No | No  | NA |
| AB NEGATIV  | AB | NEGATIVE | Full Code | NA | No  | NA |
| O POSITIVE  | O  | POSITIVE | DNR/DNI   | NA | Yes | No |
| NA          | NA | NA       | Full Code | No | No  | NA |
| NA          | NA | NA       | Full Code | NA | No  | NA |
| NA          | NA | NA       | Full Code | NA | No  | NA |

|            |    |          |           |     |     |    |
|------------|----|----------|-----------|-----|-----|----|
| NA         | NA | NA       | Full Code | NA  | No  | NA |
| O POSITIVE | O  | POSITIVE | Full Code | Yes | No  | NA |
| O POSITIVE | O  | POSITIVE | Full Code | NA  | No  | NA |
| NA         | NA | NA       | Full Code | NA  | No  | NA |
| NA         | NA | NA       | Full Code | NA  | No  | NA |
| NA         | NA | NA       | Full Code | No  | No  | NA |
| A POSITIVE | A  | POSITIVE | Full Code | No  | No  | NA |
| NA         | NA | NA       | Full Code | NA  | No  | NA |
| O POSITIVE | O  | POSITIVE | Full Code | No  | No  | NA |
| O POSITIVE | O  | POSITIVE | DNR/DNI   | No  | No  | NA |
| NA         | NA | NA       | Full Code | NA  | No  | NA |
| NA         | NA | NA       | Full Code | No  | No  | NA |
| NA         | NA | NA       | Full Code | NA  | No  | NA |
| O POSITIVE | O  | POSITIVE | Full Code | NA  | No  | NA |
| NA         | NA | NA       | Full Code | NA  | No  | NA |
| O POSITIVE | O  | POSITIVE | DNR/DNI   | No  | No  | NA |
| A POSITIVE | A  | POSITIVE | DNR/DNI   | No  | Yes | No |
| O POSITIVE | O  | POSITIVE | Full Code | No  | No  | NA |
| A POSITIVE | A  | POSITIVE | DNR/DNI   | No  | Yes | No |
| B POSITIVE | B  | POSITIVE | Full Code | No  | No  | NA |
| A POSITIVE | A  | POSITIVE | Full Code | No  | No  | NA |
| A POSITIVE | A  | POSITIVE | DNR/DNI   | No  | No  | NA |
| O POSITIVE | O  | POSITIVE | Full Code | NA  | No  | NA |
| NA         | NA | NA       | Full Code | NA  | No  | NA |
| NA         | NA | NA       | DNR/DNI   | No  | No  | NA |
| B POSITIVE | B  | POSITIVE | Full Code | NA  | No  | NA |
| O POSITIVE | O  | POSITIVE | Full Code | No  | Yes | No |
| A POSITIVE | A  | POSITIVE | DNR/DNI   | NA  | No  | NA |
| NA         | NA | NA       | DNR/DNI   | No  | No  | NA |
| NA         | NA | NA       | Full Code | NA  | No  | NA |
| NA         | NA | NA       | Full Code | NA  | No  | NA |
| O POSITIVE | O  | POSITIVE | Full Code | NA  | Yes | No |
| O POSITIVE | O  | POSITIVE | DNR/DNI   | No  | No  | NA |
| A POSITIVE | A  | POSITIVE | Full Code | No  | No  | NA |
| NA         | NA | NA       | Full Code | No  | No  | NA |
| O POSITIVE | O  | POSITIVE | DNR/DNI   | No  | No  | NA |
| A POSITIVE | A  | POSITIVE | Full Code | NA  | No  | NA |
| NA         | NA | NA       | Full Code | NA  | No  | NA |
| NA         | NA | NA       | DNR/DNI   | No  | No  | NA |
| NA         | NA | NA       | Full Code | No  | No  | NA |
| NA         | NA | NA       | Full Code | No  | No  | NA |
| NA         | NA | NA       | Full Code | NA  | No  | NA |
| NA         | NA | NA       | Full Code | NA  | No  | NA |
| NA         | NA | NA       | Full Code | NA  | No  | NA |
| NA         | NA | NA       | Full Code | NA  | No  | NA |
| O NEGATIVE | O  | NEGATIVE | DNR       | NA  | No  | NA |



|             |    |          |           |     |     |     |
|-------------|----|----------|-----------|-----|-----|-----|
| NA          | NA | NA       | DNI       | NA  | No  | NA  |
| NA          | NA | NA       | Full Code | No  | No  | NA  |
| NA          | NA | NA       | Full Code | No  | No  | NA  |
| NA          | NA | NA       | Full Code | No  | No  | NA  |
| AB POSITIVE | AB | POSITIVE | DNR/DNI   | No  | No  | NA  |
| NA          | NA | NA       | Full Code | No  | Yes | No  |
| NA          | NA | NA       | Full Code | NA  | No  | NA  |
| A POSITIVE  | A  | POSITIVE | DNR/DNI   | NA  | No  | NA  |
| O POSITIVE  | O  | POSITIVE | DNR/DNI   | No  | No  | NA  |
| NA          | NA | NA       | DNR/DNI   | No  | Yes | Yes |
| NA          | NA | NA       | DNR/DNI   | No  | Yes | Yes |
| O POSITIVE  | O  | POSITIVE | Full Code | NA  | Yes | No  |
| O POSITIVE  | O  | POSITIVE | Full Code | NA  | Yes | No  |
| NA          | NA | NA       | Full Code | NA  | No  | NA  |
| O POSITIVE  | O  | POSITIVE | Full Code | No  | No  | NA  |
| O POSITIVE  | O  | POSITIVE | DNR       | No  | No  | NA  |
| B POSITIVE  | B  | POSITIVE | Full Code | NA  | No  | NA  |
| NA          | NA | NA       | DNR/DNI   | No  | No  | NA  |
| B POSITIVE  | B  | POSITIVE | DNR/DNI   | No  | No  | NA  |
| NA          | NA | NA       | DNR/DNI   | No  | No  | NA  |
| O POSITIVE  | O  | POSITIVE | DNR/DNI   | No  | No  | NA  |
| A POSITIVE  | A  | POSITIVE | Full Code | NA  | No  | NA  |
| O POSITIVE  | O  | POSITIVE | Full Code | NA  | No  | NA  |
| NA          | NA | NA       | Full Code | NA  | No  | NA  |
| O POSITIVE  | O  | POSITIVE | Full Code | No  | Yes | No  |
| O POSITIVE  | O  | POSITIVE | Full Code | No  | Yes | No  |
| NA          | NA | NA       | Full Code | No  | No  | NA  |
| O POSITIVE  | O  | POSITIVE | DNR/DNI   | NA  | Yes | No  |
| NA          | NA | NA       | Full Code | No  | Yes | Yes |
| NA          | NA | NA       | DNR/DNI   | NA  | Yes | No  |
| A POSITIVE  | A  | POSITIVE | Full Code | Yes | No  | NA  |
| A POSITIVE  | A  | POSITIVE | DNR/DNI   | No  | No  | NA  |
| O POSITIVE  | O  | POSITIVE | DNR/DNI   | No  | Yes | No  |
| A POSITIVE  | A  | POSITIVE | Full Code | No  | No  | NA  |
| O POSITIVE  | O  | POSITIVE | DNR/DNI   | No  | No  | NA  |
| O POSITIVE  | O  | POSITIVE | Full Code | No  | No  | NA  |
| O POSITIVE  | O  | POSITIVE | Full Code | No  | No  | NA  |
| A POSITIVE  | A  | POSITIVE | DNR/DNI   | Yes | No  | NA  |
| O POSITIVE  | O  | POSITIVE | Full Code | NA  | No  | NA  |
| A POSITIVE  | A  | POSITIVE | Full Code | NA  | No  | NA  |
| A POSITIVE  | A  | POSITIVE | Full Code | NA  | No  | NA  |
| NA          | NA | NA       | Full Code | NA  | No  | NA  |
| B POSITIVE  | B  | POSITIVE | Full Code | NA  | No  | NA  |
| NA          | NA | NA       | Full Code | NA  | No  | NA  |
| O POSITIVE  | O  | POSITIVE | Full Code | NA  | Yes | Yes |

|             |    |          |           |     |     |     |
|-------------|----|----------|-----------|-----|-----|-----|
| A POSITIVE  | A  | POSITIVE | Full Code | No  | No  | NA  |
| O NEGATIVE  | O  | NEGATIVE | Full Code | NA  | No  | NA  |
| A POSITIVE  | A  | POSITIVE | DNR/DNI   | No  | No  | NA  |
| O NEGATIVE  | O  | NEGATIVE | Full Code | NA  | No  | NA  |
| AB POSITIVE | AB | POSITIVE | Full Code | No  | No  | NA  |
| NA          | NA | NA       | Full Code | NA  | No  | NA  |
| A POSITIVE  | A  | POSITIVE | Full Code | No  | Yes | No  |
| B POSITIVE  | B  | POSITIVE | DNR/DNI   | No  | Yes | No  |
| NA          | NA | NA       | Full Code | NA  | Yes | No  |
| A POSITIVE  | A  | POSITIVE | Full Code | NA  | Yes | No  |
| NA          | NA | NA       | Full Code | No  | No  | NA  |
| NA          | NA | NA       | DNR/DNI   | NA  | No  | NA  |
| B POSITIVE  | B  | POSITIVE | Full Code | No  | No  | NA  |
| A POSITIVE  | A  | POSITIVE | DNR/DNI   | NA  | Yes | No  |
| NA          | NA | NA       | DNR/DNI   | No  | No  | NA  |
| O POSITIVE  | O  | POSITIVE | Full Code | NA  | No  | NA  |
| O POSITIVE  | O  | POSITIVE | Full Code | No  | No  | NA  |
| O POSITIVE  | O  | POSITIVE | DNR/DNI   | NA  | Yes | Yes |
| NA          | NA | NA       | DNR/DNI   | No  | Yes | No  |
| O POSITIVE  | O  | POSITIVE | Full Code | No  | No  | NA  |
| NA          | NA | NA       | DNR       | NA  | No  | NA  |
| NA          | NA | NA       | Full Code | No  | No  | NA  |
| O POSITIVE  | O  | POSITIVE | DNR       | No  | No  | NA  |
| NA          | NA | NA       | Full Code | NA  | No  | NA  |
| NA          | NA | NA       | DNR/DNI   | NA  | No  | NA  |
| NA          | NA | NA       | Full Code | No  | No  | NA  |
| A POSITIVE  | A  | POSITIVE | DNR/DNI   | No  | No  | NA  |
| O POSITIVE  | O  | POSITIVE | Full Code | NA  | No  | NA  |
| NA          | NA | NA       | Full Code | NA  | No  | NA  |
| A POSITIVE  | A  | POSITIVE | Full Code | No  | No  | NA  |
| NA          | NA | NA       | Full Code | No  | No  | NA  |
| NULL        | N  | POSITIVE | DNR       | No  | No  | NA  |
| NA          | NA | NA       | Full Code | NA  | No  | NA  |
| O POSITIVE  | O  | POSITIVE | Full Code | NA  | No  | NA  |
| A POSITIVE  | A  | POSITIVE | DNR/DNI   | No  | Yes | No  |
| O POSITIVE  | O  | POSITIVE | DNR/DNI   | NA  | Yes | No  |
| NA          | NA | NA       | Full Code | No  | No  | NA  |
| NA          | NA | NA       | Full Code | No  | No  | NA  |
| NA          | NA | NA       | Full Code | No  | No  | NA  |
| A POSITIVE  | A  | POSITIVE | Full Code | No  | No  | NA  |
| NA          | NA | NA       | Full Code | No  | No  | NA  |
| O POSITIVE  | O  | POSITIVE | DNR/DNI   | No  | No  | NA  |
| NA          | NA | NA       | Full Code | No  | No  | NA  |
| O POSITIVE  | O  | POSITIVE | Full Code | No  | No  | NA  |
| A POSITIVE  | A  | POSITIVE | Full Code | Yes | No  | NA  |

|            |    |          |           |    |     |     |
|------------|----|----------|-----------|----|-----|-----|
| NA         | NA | NA       | Full Code | No | No  | NA  |
| A POSITIVE | A  | POSITIVE | Full Code | No | No  | NA  |
| O POSITIVE | O  | POSITIVE | Full Code | NA | Yes | No  |
| NA         | NA | NA       | DNR       | NA | No  | NA  |
| B POSITIVE | B  | POSITIVE | DNR/DNI   | NA | No  | NA  |
| NA         | NA | NA       | Full Code | No | No  | NA  |
| NA         | NA | NA       | Full Code | No | No  | NA  |
| NA         | NA | NA       | DNR       | NA | No  | NA  |
| NA         | NA | NA       | Full Code | NA | No  | NA  |
| O POSITIVE | O  | POSITIVE | Full Code | NA | No  | NA  |
| O POSITIVE | O  | POSITIVE | Full Code | No | No  | NA  |
| O POSITIVE | O  | POSITIVE | Full Code | NA | No  | NA  |
| B POSITIVE | B  | POSITIVE | DNR       | No | No  | NA  |
| NA         | NA | NA       | Full Code | No | No  | NA  |
| NA         | NA | NA       | DNR/DNI   | No | No  | NA  |
| NA         | NA | NA       | DNR/DNI   | No | No  | NA  |
| O POSITIVE | O  | POSITIVE | Full Code | No | No  | NA  |
| NA         | NA | NA       | DNR/DNI   | No | No  | NA  |
| O POSITIVE | O  | POSITIVE | Full Code | No | No  | NA  |
| A POSITIVE | A  | POSITIVE | DNR/DNI   | No | Yes | No  |
| NA         | NA | NA       | Full Code | No | No  | NA  |
| NA         | NA | NA       | Full Code | NA | No  | NA  |
| NA         | NA | NA       | DNR/DNI   | No | No  | NA  |
| NA         | NA | NA       | Full Code | NA | No  | NA  |
| NA         | NA | NA       | Full Code | NA | No  | NA  |
| O POSITIVE | O  | POSITIVE | Full Code | No | No  | NA  |
| A POSITIVE | A  | POSITIVE | DNR       | No | No  | NA  |
| B POSITIVE | B  | POSITIVE | Full Code | NA | No  | NA  |
| O POSITIVE | O  | POSITIVE | Full Code | No | No  | NA  |
| O POSITIVE | O  | POSITIVE | Full Code | NA | No  | NA  |
| NA         | NA | NA       | Full Code | NA | No  | NA  |
| NA         | NA | NA       | Full Code | NA | No  | NA  |
| NA         | NA | NA       | Full Code | No | Yes | Yes |
| NA         | NA | NA       | Full Code | NA | Yes | No  |
| O POSITIVE | O  | POSITIVE | Full Code | No | No  | NA  |
| A POSITIVE | A  | POSITIVE | DNR/DNI   | NA | No  | NA  |
| B POSITIVE | B  | POSITIVE | Full Code | NA | No  | NA  |
| NA         | NA | NA       | Full Code | No | Yes | No  |
| NA         | NA | NA       | Full Code | NA | No  | NA  |
| A NEGATIVE | A  | NEGATIVE | DNR/DNI   | No | No  | NA  |
| NA         | NA | NA       | Full Code | NA | No  | NA  |
| NA         | NA | NA       | Full Code | NA | No  | NA  |
| B POSITIVE | B  | POSITIVE | Full Code | NA | No  | NA  |
| NA         | NA | NA       | Full Code | NA | No  | NA  |
| A POSITIVE | A  | POSITIVE | DNR/DNI   | NA | No  | NA  |

|             |    |          |           |    |     |     |
|-------------|----|----------|-----------|----|-----|-----|
| O NEGATIVE  | O  | NEGATIVE | DNR/DNI   | NA | No  | NA  |
| NA          | NA | NA       | Full Code | NA | No  | NA  |
| O POSITIVE  | O  | POSITIVE | Full Code | No | No  | NA  |
| NA          | NA | NA       | DNR/DNI   | No | No  | NA  |
| NA          | NA | NA       | Full Code | NA | No  | NA  |
| NA          | NA | NA       | DNR       | NA | Yes | No  |
| NA          | NA | NA       | Full Code | NA | No  | NA  |
| B POSITIVE  | B  | POSITIVE | Full Code | No | No  | NA  |
| A POSITIVE  | A  | POSITIVE | Full Code | No | No  | NA  |
| NA          | NA | NA       | DNR/DNI   | NA | No  | NA  |
| NA          | NA | NA       | DNR/DNI   | No | No  | NA  |
| B POSITIVE  | B  | POSITIVE | DNR/DNI   | NA | Yes | Yes |
| A POSITIVE  | A  | POSITIVE | Full Code | No | No  | NA  |
| AB NEGATIV  | AB | NEGATIVE | Full Code | NA | No  | NA  |
| B POSITIVE  | B  | POSITIVE | Full Code | No | No  | NA  |
| NA          | NA | NA       | Full Code | NA | No  | NA  |
| O POSITIVE  | O  | POSITIVE | Full Code | No | No  | NA  |
| AB POSITIVE | AB | POSITIVE | Full Code | No | Yes | No  |
| A POSITIVE  | A  | POSITIVE | Full Code | NA | Yes | No  |
| A POSITIVE  | A  | POSITIVE | Full Code | NA | Yes | No  |
| A POSITIVE  | A  | POSITIVE | DNR/DNI   | No | No  | NA  |
| A POSITIVE  | A  | POSITIVE | DNR/DNI   | No | No  | NA  |
| NA          | NA | NA       | DNR/DNI   | No | Yes | No  |
| NA          | NA | NA       | Full Code | NA | No  | NA  |
| NA          | NA | NA       | Full Code | NA | Yes | No  |
| NA          | NA | NA       | Full Code | NA | Yes | No  |
| NA          | NA | NA       | Full Code | NA | No  | NA  |
| A POSITIVE  | A  | POSITIVE | DNR/DNI   | No | No  | NA  |
| O POSITIVE  | O  | POSITIVE | DNR/DNI   | No | No  | NA  |
| NA          | NA | NA       | DNR       | NA | Yes | No  |
| O POSITIVE  | O  | POSITIVE | DNR/DNI   | NA | No  | NA  |
| NA          | NA | NA       | Full Code | NA | No  | NA  |
| O POSITIVE  | O  | POSITIVE | Full Code | No | No  | NA  |
| NA          | NA | NA       | Full Code | No | No  | NA  |
| AB POSITIVE | AB | POSITIVE | DNR/DNI   | No | No  | NA  |
| NA          | NA | NA       | Full Code | NA | No  | NA  |
| NA          | NA | NA       | Full Code | No | No  | NA  |
| A POSITIVE  | A  | POSITIVE | Full Code | NA | No  | NA  |
| NA          | NA | NA       | Full Code | No | No  | NA  |
| NA          | NA | NA       | Full Code | NA | No  | NA  |
| O NEGATIVE  | O  | NEGATIVE | Full Code | No | Yes | No  |
| A POSITIVE  | A  | POSITIVE | DNR/DNI   | NA | No  | NA  |
| A POSITIVE  | A  | POSITIVE | Full Code | No | Yes | Yes |
| O POSITIVE  | O  | POSITIVE | Full Code | No | No  | NA  |
| A POSITIVE  | A  | POSITIVE | Full Code | NA | No  | NA  |

|            |    |          |           |    |     |     |
|------------|----|----------|-----------|----|-----|-----|
| NA         | NA | NA       | Full Code | NA | No  | NA  |
| NA         | NA | NA       | Full Code | No | No  | NA  |
| NA         | NA | NA       | DNR/DNI   | No | No  | NA  |
| NA         | NA | NA       | Full Code | No | No  | NA  |
| O POSITIVE | O  | POSITIVE | DNR       | NA | No  | NA  |
| O POSITIVE | O  | POSITIVE | Full Code | NA | Yes | Yes |
| A POSITIVE | A  | POSITIVE | Full Code | No | No  | NA  |



























































|           |           |           |           |    |     |           |
|-----------|-----------|-----------|-----------|----|-----|-----------|
| Unchecked | Unchecked | Unchecked | Unchecked | NA | No  | Unchecked |
| Unchecked | Unchecked | Unchecked | Unchecked | NA | Yes | Checked   |
| Unchecked | Unchecked | Unchecked | Unchecked | NA | Yes | Checked   |
| Unchecked | Unchecked | Unchecked | Unchecked | NA | Yes | Checked   |
| Unchecked | Unchecked | Unchecked | Unchecked | NA | No  | Unchecked |
| Checked   | Unchecked | Unchecked | Unchecked | NA | No  | Unchecked |
| Unchecked | Unchecked | Unchecked | Unchecked | NA | Yes | Checked   |





|           |           |           |                 |     |           |           |
|-----------|-----------|-----------|-----------------|-----|-----------|-----------|
| Unchecked | Unchecked | Unchecked | NA              | No  | Unchecked | Unchecked |
| Unchecked | Unchecked | Checked   | hyperlipidem    | Yes | Checked   | Unchecked |
| Unchecked | Unchecked | Checked   | high cholestr   | No  | Unchecked | Unchecked |
| Unchecked | Unchecked | Checked   | chronic anem    | No  | Unchecked | Unchecked |
| Unchecked | Unchecked | Unchecked | NA              | No  | Unchecked | Unchecked |
| Unchecked | Unchecked | Checked   | cardiac cath    | Yes | Unchecked | Unchecked |
| Unchecked | Unchecked | Unchecked | NA              | No  | Unchecked | Unchecked |
| Unchecked | Unchecked | Unchecked | NA              | No  | Unchecked | Unchecked |
| Unchecked | Unchecked | Checked   | high cholest    | No  | Unchecked | Unchecked |
| Unchecked | Unchecked | Unchecked | NA              | No  | Unchecked | Unchecked |
| Unchecked | Unchecked | Checked   | high cholest    | Yes | Checked   | Unchecked |
| Unchecked | Unchecked | Unchecked | NA              | No  | Unchecked | Unchecked |
| Unchecked | Unchecked | Unchecked | NA              | Yes | Checked   | Unchecked |
| Unchecked | Unchecked | Unchecked | NA              | No  | Unchecked | Unchecked |
| Checked   | Unchecked | Checked   | atrial fibrilla | No  | Unchecked | Unchecked |
| Unchecked | Unchecked | Unchecked | NA              | No  | Unchecked | Unchecked |
| Unchecked | Unchecked | Unchecked | NA              | No  | Unchecked | Unchecked |
| Checked   | Unchecked | Checked   | CABG, Afib      | No  | Unchecked | Unchecked |
| Unchecked | Unchecked | Unchecked | NA              | No  | Unchecked | Unchecked |
| Unchecked | Unchecked | Checked   | dyslipidemia    | No  | Unchecked | Unchecked |
| Unchecked | Unchecked | Unchecked | NA              | No  | Unchecked | Unchecked |
| Checked   | Checked   | Checked   | HLD, SVT, isc   | No  | Unchecked | Unchecked |
| Checked   | Unchecked | Checked   | HLD             | No  | Unchecked | Unchecked |
| Unchecked | Unchecked | Unchecked | NA              | Yes | Checked   | Unchecked |
| Unchecked | Unchecked | Unchecked | NA              | No  | Unchecked | Unchecked |
| Unchecked | Unchecked | Unchecked | NA              | No  | Unchecked | Unchecked |
| Unchecked | Unchecked | Unchecked | NA              | No  | Unchecked | Unchecked |
| Unchecked | Unchecked | Checked   | high cholest    | Yes | Checked   | Checked   |
| Unchecked | Unchecked | Unchecked | NA              | No  | Unchecked | Unchecked |
| Checked   | Unchecked | Checked   | prosthetic va   | No  | Unchecked | Unchecked |
| Unchecked | Unchecked | Checked   | HLD             | No  | Unchecked | Unchecked |
| Unchecked | Unchecked | Unchecked | NA              | No  | Unchecked | Unchecked |
| Unchecked | Unchecked | Checked   | dyslipidemia    | No  | Unchecked | Unchecked |
| Unchecked | Unchecked | Unchecked | NA              | No  | Unchecked | Unchecked |
| Unchecked | Unchecked | Checked   | HLD             | No  | Unchecked | Unchecked |
| Unchecked | Unchecked | Checked   | atrial fibrilla | No  | Unchecked | Unchecked |
| Unchecked | Unchecked | Checked   | atrial fibrilla | No  | Unchecked | Unchecked |
| Unchecked | Unchecked | Unchecked | NA              | No  | Unchecked | Unchecked |
| Checked   | Unchecked | Checked   | high cholest    | Yes | Unchecked | Unchecked |
| Checked   | Unchecked | Checked   | HLD, CABG, /    | No  | Unchecked | Unchecked |
| Unchecked | Unchecked | Unchecked | NA              | No  | Unchecked | Unchecked |
| Checked   | Checked   | Checked   | atrial fibrilla | No  | Unchecked | Unchecked |
| Checked   | Checked   | Checked   | HLD, stents,    | Yes | Unchecked | Checked   |
| Unchecked | Unchecked | Checked   | HLD, AAA ste    | No  | Unchecked | Unchecked |
| Checked   | Unchecked | Checked   | aortic stenos   | No  | Unchecked | Unchecked |

|           |           |           |                 |     |           |           |
|-----------|-----------|-----------|-----------------|-----|-----------|-----------|
| Unchecked | Unchecked | Checked   | orthostatic h   | No  | Unchecked | Unchecked |
| Checked   | Unchecked | Checked   | DES placeme     | No  | Unchecked | Unchecked |
| Unchecked | Unchecked | Checked   | atrial fibrilla | No  | Unchecked | Unchecked |
| Unchecked | Unchecked | Checked   | HLD, MI         | No  | Unchecked | Unchecked |
| Unchecked | Unchecked | Checked   | atrial fibrilla | No  | Unchecked | Unchecked |
| Unchecked | Unchecked | Unchecked | NA              | No  | Unchecked | Unchecked |
| Unchecked | Unchecked | Checked   | HLD             | No  | Unchecked | Unchecked |
| Unchecked | Unchecked | Unchecked | NA              | No  | Unchecked | Unchecked |
| Unchecked | Unchecked | Unchecked | NA              | No  | Unchecked | Unchecked |
| Unchecked | Unchecked | Checked   | HLD             | No  | Unchecked | Unchecked |
| Unchecked | Unchecked | Checked   | HLD             | No  | Unchecked | Unchecked |
| Unchecked | Unchecked | Unchecked | NA              | No  | Unchecked | Unchecked |
| Unchecked | Unchecked | Unchecked | NA              | No  | Unchecked | Unchecked |
| Checked   | Checked   | Checked   | Afib, pulmon    | No  | Unchecked | Unchecked |
| Unchecked | Unchecked | Checked   | HLD             | No  | Unchecked | Unchecked |
| Unchecked | Unchecked | Checked   | HLD             | No  | Unchecked | Unchecked |
| Unchecked | Unchecked | Unchecked | NA              | No  | Unchecked | Unchecked |
| Unchecked | Unchecked | Checked   | ?CAD            | No  | Unchecked | Unchecked |
| Unchecked | Unchecked | Unchecked | NA              | Yes | Unchecked | Checked   |
| Unchecked | Unchecked | Checked   | atrial fibrilla | No  | Unchecked | Unchecked |
| Unchecked | Unchecked | Checked   | atrial fibrilla | No  | Unchecked | Unchecked |
| Checked   | Unchecked | Checked   | HLD             | No  | Unchecked | Unchecked |
| Checked   | Unchecked | Unchecked | NA              | Yes | Unchecked | Unchecked |
| Checked   | Checked   | Unchecked | NA              | Yes | Unchecked | Checked   |
| Unchecked | Unchecked | Unchecked | NA              | No  | Unchecked | Unchecked |
| Unchecked | Unchecked | Unchecked | NA              | No  | Unchecked | Unchecked |
| Unchecked | Unchecked | Unchecked | NA              | No  | Unchecked | Unchecked |
| Unchecked | Unchecked | Checked   | atrial fibrilla | No  | Unchecked | Unchecked |
| Unchecked | Unchecked | Unchecked | NA              | No  | Unchecked | Unchecked |
| Unchecked | Unchecked | Unchecked | NA              | No  | Unchecked | Unchecked |
| Unchecked | Unchecked | Checked   | SVT             | No  | Unchecked | Unchecked |
| Unchecked | Unchecked | Unchecked | NA              | Yes | Checked   | Unchecked |
| Unchecked | Unchecked | Unchecked | NA              | No  | Unchecked | Unchecked |
| Unchecked | Unchecked | Unchecked | NA              | No  | Unchecked | Unchecked |
| Unchecked | Unchecked | Unchecked | NA              | No  | Unchecked | Unchecked |
| Unchecked | Unchecked | Checked   | hyperlipidem    | No  | Unchecked | Unchecked |
| Unchecked | Unchecked | Checked   | hypercholest    | No  | Unchecked | Unchecked |
| Checked   | Unchecked | Unchecked | NA              | No  | Unchecked | Unchecked |
| Unchecked | Unchecked | Unchecked | NA              | No  | Unchecked | Unchecked |
| Unchecked | Unchecked | Unchecked | NA              | No  | Unchecked | Unchecked |
| Unchecked | Unchecked | Unchecked | NA              | No  | Unchecked | Unchecked |
| Checked   | Unchecked | Unchecked | NA              | No  | Unchecked | Unchecked |
| Unchecked | Checked   | Checked   | mitral valve    | No  | Unchecked | Unchecked |
| Unchecked | Unchecked | Checked   | hyperlipidem    | No  | Unchecked | Unchecked |
| Unchecked | Unchecked | Unchecked | NA              | No  | Unchecked | Unchecked |









|           |           |           |                      |     |           |           |
|-----------|-----------|-----------|----------------------|-----|-----------|-----------|
| Unchecked | Unchecked | Unchecked | NA                   | No  | Unchecked | Unchecked |
| Unchecked | Unchecked | Unchecked | NA                   | Yes | Unchecked | Checked   |
| Unchecked | Unchecked | Unchecked | NA                   | No  | Unchecked | Unchecked |
| Checked   | Unchecked | Checked   | afib                 | No  | Unchecked | Unchecked |
| Unchecked | Unchecked | Unchecked | NA                   | No  | Unchecked | Unchecked |
| Unchecked | Unchecked | Checked   | Afib                 | No  | Unchecked | Unchecked |
| Unchecked | Unchecked | Unchecked | NA                   | No  | Unchecked | Unchecked |
| Unchecked | Unchecked | Unchecked | NA                   | No  | Unchecked | Unchecked |
| Unchecked | Unchecked | Unchecked | NA                   | Yes | Checked   | Unchecked |
| Unchecked | Checked   | Unchecked | NA                   | Yes | Unchecked | Checked   |
| Unchecked | Unchecked | Unchecked | NA                   | No  | Unchecked | Unchecked |
| Unchecked | Unchecked | Unchecked | NA                   | No  | Unchecked | Unchecked |
| Unchecked | Unchecked | Unchecked | NA                   | No  | Unchecked | Unchecked |
| Unchecked | Unchecked | Checked   | a flutter            | No  | Unchecked | Unchecked |
| Unchecked | Unchecked | Unchecked | NA                   | Yes | Checked   | Unchecked |
| Unchecked | Unchecked | Unchecked | NA                   | No  | Unchecked | Unchecked |
| Unchecked | Unchecked | Unchecked | NA                   | No  | Unchecked | Unchecked |
| Unchecked | Unchecked | Unchecked | NA                   | No  | Unchecked | Unchecked |
| Unchecked | Unchecked | Unchecked | NA                   | No  | Unchecked | Unchecked |
| Unchecked | Unchecked | Unchecked | NA                   | No  | Unchecked | Unchecked |
| Unchecked | Unchecked | Unchecked | NA                   | Yes | Unchecked | Checked   |
| Unchecked | Unchecked | Checked   | non-ischemic         | No  | Unchecked | Unchecked |
| Unchecked | Unchecked | Checked   | ischemic heart       | No  | Unchecked | Unchecked |
| Checked   | Unchecked | Unchecked | NA                   | No  | Unchecked | Unchecked |
| Unchecked | Unchecked | Checked   | HLD                  | No  | Unchecked | Unchecked |
| Unchecked | Unchecked | Checked   | hyperlipidemia       | Yes | Unchecked | Checked   |
| Unchecked | Unchecked | Checked   | hyperlipidemia       | No  | Unchecked | Unchecked |
| Unchecked | Unchecked | Checked   | Afib, bradycardia    | Yes | Unchecked | Checked   |
| Unchecked | Unchecked | Unchecked | NA                   | No  | Unchecked | Unchecked |
| Checked   | Unchecked | Checked   | Afib, CHF            | Yes | Unchecked | Checked   |
| Unchecked | Unchecked | Unchecked | NA                   | No  | Unchecked | Unchecked |
| Unchecked | Unchecked | Unchecked | NA                   | No  | Unchecked | Unchecked |
| Unchecked | Unchecked | Unchecked | NA                   | No  | Unchecked | Unchecked |
| Unchecked | Unchecked | Unchecked | NA                   | No  | Unchecked | Unchecked |
| Unchecked | Unchecked | Unchecked | NA                   | No  | Unchecked | Unchecked |
| Unchecked | Unchecked | Unchecked | NA                   | No  | Unchecked | Unchecked |
| Unchecked | Unchecked | Checked   | Afib                 | No  | Unchecked | Unchecked |
| Unchecked | Unchecked | Unchecked | NA                   | No  | Unchecked | Unchecked |
| Unchecked | Unchecked | Checked   | elevated cholesterol | No  | Unchecked | Unchecked |
| Unchecked | Unchecked | Checked   | Afib, hyperlipidemia | No  | Unchecked | Unchecked |
| Unchecked | Unchecked | Unchecked | NA                   | No  | Unchecked | Unchecked |
| Unchecked | Unchecked | Unchecked | NA                   | No  | Unchecked | Unchecked |
| Unchecked | Unchecked | Unchecked | NA                   | No  | Unchecked | Unchecked |
| Unchecked | Unchecked | Checked   | HLD, CAD, CAE        | No  | Unchecked | Unchecked |
| Unchecked | Unchecked | Checked   | hyperlipidemia       | No  | Unchecked | Unchecked |



|           |           |           |               |     |           |           |
|-----------|-----------|-----------|---------------|-----|-----------|-----------|
| Unchecked | Unchecked | Unchecked | NA            | No  | Unchecked | Unchecked |
| Unchecked | Unchecked | Checked   | Afib, CABG, I | No  | Unchecked | Unchecked |
| Unchecked | Unchecked | Checked   | hyperlipidem  | No  | Unchecked | Unchecked |
| Checked   | Unchecked | Checked   | Afib, CABG    | No  | Unchecked | Unchecked |
| Unchecked | Unchecked | Unchecked | NA            | No  | Unchecked | Unchecked |
| Checked   | Checked   | Checked   | CABG, MV re   | Yes | Checked   | Checked   |
| Checked   | Checked   | Checked   | CAG, MVR, A   | Yes | Checked   | Checked   |
| Unchecked | Unchecked | Unchecked | NA            | No  | Unchecked | Unchecked |
| Unchecked | Unchecked | Unchecked | NA            | Yes | Unchecked | Unchecked |
| Checked   | Unchecked | Checked   | hyperlipidem  | No  | Unchecked | Unchecked |
| Unchecked | Unchecked | Checked   | hyperlipidem  | No  | Unchecked | Unchecked |
| Unchecked | Unchecked | Checked   | Afib          | No  | Unchecked | Unchecked |
| Unchecked | Unchecked | Checked   | hyperlipidem  | Yes | Checked   | Unchecked |
| Unchecked | Unchecked | Checked   | Afib          | Yes | Checked   | Unchecked |
| Unchecked | Unchecked | Unchecked | NA            | No  | Unchecked | Unchecked |
| Unchecked | Unchecked | Unchecked | NA            | No  | Unchecked | Unchecked |
| Unchecked | Unchecked | Unchecked | NA            | No  | Unchecked | Unchecked |
| Unchecked | Unchecked | Unchecked | NA            | No  | Unchecked | Unchecked |
| Unchecked | Unchecked | Unchecked | NA            | No  | Unchecked | Unchecked |
| Unchecked | Unchecked | Checked   | hyperlidemia  | No  | Unchecked | Unchecked |
| Unchecked | Unchecked | Checked   | hyperlidemia  | No  | Unchecked | Unchecked |
| Unchecked | Checked   | Checked   | hyperlipidem  | Yes | Checked   | Unchecked |
| Unchecked | Checked   | Checked   | hyperlipidem  | Yes | Checked   | Unchecked |
| Unchecked | Unchecked | Unchecked | NA            | No  | Unchecked | Unchecked |
| Unchecked | Unchecked | Checked   | hyperlipidem  | Yes | Unchecked | Unchecked |
| Unchecked | Unchecked | Unchecked | NA            | No  | Unchecked | Unchecked |
| Checked   | Unchecked | Checked   | hyperlipidem  | No  | Unchecked | Unchecked |
| Unchecked | Unchecked | Unchecked | NA            | No  | Unchecked | Unchecked |
| Unchecked | Checked   | Checked   | Hypercholest  | Yes | Unchecked | Checked   |
| Unchecked | Unchecked | Unchecked | NA            | No  | Unchecked | Unchecked |
| Unchecked | Unchecked | Unchecked | NA            | No  | Unchecked | Unchecked |
| Unchecked | Unchecked | Unchecked | NA            | No  | Unchecked | Unchecked |
| Unchecked | Unchecked | Unchecked | NA            | No  | Unchecked | Unchecked |
| Unchecked | Unchecked | Checked   | HLD           | No  | Unchecked | Unchecked |
| Checked   | Unchecked | Checked   | CABG, HLD     | No  | Unchecked | Unchecked |
| Unchecked | Unchecked | Checked   | hyperlipidem  | No  | Unchecked | Unchecked |
| Unchecked | Unchecked | Checked   | hyperlipidem  | No  | Unchecked | Unchecked |
| Unchecked | Unchecked | Unchecked | NA            | No  | Unchecked | Unchecked |
| Unchecked | Unchecked | Unchecked | NA            | No  | Unchecked | Unchecked |
| Unchecked | Unchecked | Unchecked | NA            | No  | Unchecked | Unchecked |
| Unchecked | Unchecked | Unchecked | NA            | No  | Unchecked | Unchecked |
| Unchecked | Unchecked | Unchecked | NA            | No  | Unchecked | Unchecked |
| Unchecked | Unchecked | Checked   | NSTEMI, hyp   | No  | Unchecked | Unchecked |
| Unchecked | Checked   | Unchecked | NA            | No  | Unchecked | Unchecked |



|           |           |           |               |     |           |           |
|-----------|-----------|-----------|---------------|-----|-----------|-----------|
| Unchecked | Unchecked | Unchecked | NA            | No  | Unchecked | Unchecked |
| Unchecked | Unchecked | Checked   | syncope       | No  | Unchecked | Unchecked |
| Unchecked | Unchecked | Unchecked | NA            | No  | Unchecked | Unchecked |
| Unchecked | Unchecked | Unchecked | NA            | No  | Unchecked | Unchecked |
| Unchecked | Unchecked | Unchecked | NA            | No  | Unchecked | Unchecked |
| Unchecked | Unchecked | Unchecked | NA            | No  | Unchecked | Unchecked |
| Checked   | Unchecked | Checked   | afib          | No  | Unchecked | Unchecked |
| Checked   | Unchecked | Unchecked | NA            | No  | Unchecked | Unchecked |
| Checked   | Unchecked | Unchecked | NA            | No  | Unchecked | Unchecked |
| Checked   | Unchecked | Unchecked | NA            | No  | Unchecked | Unchecked |
| Unchecked | Unchecked | Unchecked | NA            | No  | Unchecked | Unchecked |
| Unchecked | Unchecked | Unchecked | NA            | No  | Unchecked | Unchecked |
| Unchecked | Unchecked | Unchecked | NA            | No  | Unchecked | Unchecked |
| Unchecked | Unchecked | Checked   | CVA, HDL      | No  | Unchecked | Unchecked |
| Unchecked | Unchecked | Checked   | cholesterol   | No  | Unchecked | Unchecked |
| Checked   | Unchecked | Unchecked | NA            | No  | Unchecked | Unchecked |
| Checked   | Unchecked | Checked   | afib          | No  | Unchecked | Unchecked |
| Unchecked | Unchecked | Checked   | cholesterol   | Yes | Unchecked | Checked   |
| Checked   | Unchecked | Checked   | afib, CVA, ch | No  | Unchecked | Unchecked |
| Unchecked | Unchecked | Unchecked | NA            | No  | Unchecked | Unchecked |
| Unchecked | Unchecked | Checked   | stents, afib  | No  | Unchecked | Unchecked |
| Unchecked | Unchecked | Unchecked | NA            | No  | Unchecked | Unchecked |
| Unchecked | Unchecked | Unchecked | NA            | Yes | Checked   | Unchecked |
| Unchecked | Unchecked | Checked   | High Cholest  | Yes | Checked   | Unchecked |
| Unchecked | Unchecked | Unchecked | NA            | Yes | Checked   | Unchecked |
| Unchecked | Unchecked | Unchecked | NA            | No  | Unchecked | Unchecked |
| Unchecked | Unchecked | Unchecked | NA            | No  | Unchecked | Unchecked |
| Checked   | Checked   | Checked   | CVA, Cardiac  | Yes | Unchecked | Unchecked |
| Checked   | Unchecked | Unchecked | NA            | No  | Unchecked | Unchecked |
| Checked   | Unchecked | Unchecked | NA            | No  | Unchecked | Unchecked |
| Unchecked | Checked   | Unchecked | NA            | No  | Unchecked | Unchecked |
| Unchecked | Unchecked | Checked   | hyperlipidem  | No  | Unchecked | Unchecked |
| Unchecked | Unchecked | Unchecked | NA            | No  | Unchecked | Unchecked |
| Unchecked | Unchecked | Unchecked | NA            | No  | Unchecked | Unchecked |
| Unchecked | Unchecked | Checked   | High Cholest  | No  | Unchecked | Unchecked |
| Unchecked | Unchecked | Unchecked | NA            | Yes | Checked   | Unchecked |
| Unchecked | Unchecked | Unchecked | NA            | No  | Unchecked | Unchecked |
| Unchecked | Unchecked | Unchecked | NA            | No  | Unchecked | Unchecked |
| Unchecked | Unchecked | Unchecked | NA            | No  | Unchecked | Unchecked |
| Unchecked | Unchecked | Unchecked | NA            | No  | Unchecked | Unchecked |
| Unchecked | Unchecked | Unchecked | NA            | No  | Unchecked | Unchecked |
| Unchecked | Unchecked | Unchecked | NA            | No  | Unchecked | Unchecked |
| Unchecked | Unchecked | Checked   | High Cholest  | No  | Unchecked | Unchecked |
| Unchecked | Unchecked | Checked   | High Cholest  | No  | Unchecked | Unchecked |



|           |           |           |                |     |           |           |
|-----------|-----------|-----------|----------------|-----|-----------|-----------|
| Unchecked | Unchecked | Unchecked | NA             | No  | Unchecked | Unchecked |
| Unchecked | Unchecked | Checked   | High Cholest   | No  | Unchecked | Unchecked |
| Unchecked | Unchecked | Unchecked | NA             | No  | Unchecked | Unchecked |
| Checked   | Unchecked | Unchecked | NA             | No  | Unchecked | Unchecked |
| Checked   | Unchecked | Checked   | stents         | No  | Unchecked | Unchecked |
| Unchecked | Unchecked | Unchecked | NA             | No  | Unchecked | Unchecked |
| Checked   | Unchecked | Checked   | afib cva, pac  | No  | Unchecked | Unchecked |
| Unchecked | Unchecked | Unchecked | NA             | No  | Unchecked | Unchecked |
| Unchecked | Unchecked | Unchecked | NA             | No  | Unchecked | Unchecked |
| Unchecked | Unchecked | Checked   | cva            | No  | Unchecked | Unchecked |
| Unchecked | Unchecked | Checked   | cholesterol    | No  | Unchecked | Unchecked |
| Unchecked | Unchecked | Unchecked | NA             | No  | Unchecked | Unchecked |
| Unchecked | Unchecked | Unchecked | NA             | No  | Unchecked | Unchecked |
| Unchecked | Unchecked | Unchecked | NA             | No  | Unchecked | Unchecked |
| Unchecked | Unchecked | Unchecked | NA             | No  | Unchecked | Unchecked |
| Unchecked | Unchecked | Checked   | systolic murr  | No  | Unchecked | Unchecked |
| Checked   | Unchecked | Checked   | Wolff-Parkin   | No  | Unchecked | Unchecked |
| Unchecked | Unchecked | Unchecked | NA             | No  | Unchecked | Unchecked |
| Unchecked | Unchecked | Unchecked | NA             | No  | Unchecked | Unchecked |
| Unchecked | Unchecked | Unchecked | NA             | No  | Unchecked | Unchecked |
| Unchecked | Unchecked | Unchecked | NA             | No  | Unchecked | Unchecked |
| Unchecked | Unchecked | Unchecked | NA             | Yes | Unchecked | Checked   |
| Unchecked | Unchecked | Unchecked | NA             | No  | Unchecked | Unchecked |
| Unchecked | Unchecked | Unchecked | NA             | No  | Unchecked | Unchecked |
| Checked   | Unchecked | Unchecked | NA             | No  | Unchecked | Unchecked |
| Checked   | Unchecked | Unchecked | NA             | No  | Unchecked | Unchecked |
| Unchecked | Unchecked | Checked   | Atrial Flutter | No  | Unchecked | Unchecked |
| Unchecked | Unchecked | Checked   | STEMI          | No  | Unchecked | Unchecked |
| Unchecked | Unchecked | Unchecked | NA             | Yes | Checked   | Unchecked |
| Unchecked | Unchecked | Unchecked | NA             | No  | Unchecked | Unchecked |
| Unchecked | Unchecked | Unchecked | NA             | No  | Unchecked | Unchecked |
| Unchecked | Unchecked | Unchecked | NA             | Yes | Checked   | Unchecked |
| Unchecked | Unchecked | Unchecked | NA             | No  | Unchecked | Unchecked |
| Unchecked | Unchecked | Unchecked | NA             | No  | Unchecked | Unchecked |
| Unchecked | Unchecked | Unchecked | NA             | Yes | Unchecked | Checked   |
| Unchecked | Unchecked | Unchecked | NA             | Yes | Unchecked | Unchecked |
| Unchecked | Unchecked | Checked   | Mitral Regur   | No  | Unchecked | Unchecked |
| Unchecked | Unchecked | Checked   | high cholest   | No  | Unchecked | Unchecked |
| Checked   | Unchecked | Checked   | High cholest   | No  | Unchecked | Unchecked |
| Checked   | Unchecked | Checked   | High Cholest   | No  | Unchecked | Unchecked |
| Unchecked | Unchecked | Unchecked | NA             | No  | Unchecked | Unchecked |
| Unchecked | Unchecked | Unchecked | NA             | No  | Unchecked | Unchecked |
| Unchecked | Unchecked | Unchecked | NA             | No  | Unchecked | Unchecked |
| Unchecked | Unchecked | Checked   | Sturge-Web     | No  | Unchecked | Unchecked |
| Unchecked | Unchecked | Checked   | High Cholest   | No  | Unchecked | Unchecked |

|           |           |           |               |     |           |           |
|-----------|-----------|-----------|---------------|-----|-----------|-----------|
| Unchecked | Unchecked | Checked   | High Cholest  | No  | Unchecked | Unchecked |
| Unchecked | Unchecked | Unchecked | NA            | No  | Unchecked | Unchecked |
| Unchecked | Unchecked | Unchecked | NA            | Yes | Unchecked | Checked   |
| Unchecked | Unchecked | Checked   | High Cholest  | No  | Unchecked | Unchecked |
| Unchecked | Unchecked | Unchecked | NA            | No  | Unchecked | Unchecked |
| Unchecked | Unchecked | Unchecked | NA            | No  | Unchecked | Unchecked |
| Unchecked | Unchecked | Checked   | High Cholest  | No  | Unchecked | Unchecked |
| Unchecked | Unchecked | Unchecked | NA            | No  | Unchecked | Unchecked |
| Unchecked | Unchecked | Unchecked | NA            | No  | Unchecked | Unchecked |
| Unchecked | Unchecked | Unchecked | NA            | Yes | Unchecked | Checked   |
| Unchecked | Unchecked | Unchecked | NA            | No  | Unchecked | Unchecked |
| Unchecked | Unchecked | Unchecked | NA            | No  | Unchecked | Unchecked |
| Unchecked | Unchecked | Unchecked | NA            | No  | Unchecked | Unchecked |
| Unchecked | Unchecked | Unchecked | NA            | No  | Unchecked | Unchecked |
| Unchecked | Unchecked | Unchecked | NA            | No  | Unchecked | Unchecked |
| Unchecked | Unchecked | Unchecked | NA            | No  | Unchecked | Unchecked |
| Unchecked | Unchecked | Checked   | afib          | Yes | Unchecked | Unchecked |
| Checked   | Unchecked | Checked   | High Cholest  | Yes | Unchecked | Checked   |
| Checked   | Checked   | Checked   | pacemaker, s  | No  | Unchecked | Unchecked |
| Unchecked | Unchecked | Unchecked | NA            | No  | Unchecked | Unchecked |
| Unchecked | Unchecked | Unchecked | NA            | No  | Unchecked | Unchecked |
| Unchecked | Unchecked | Unchecked | NA            | No  | Unchecked | Unchecked |
| Unchecked | Unchecked | Unchecked | NA            | No  | Unchecked | Unchecked |
| Unchecked | Unchecked | Unchecked | NA            | No  | Unchecked | Unchecked |
| Unchecked | Unchecked | Checked   | High cholest  | No  | Unchecked | Unchecked |
| Unchecked | Unchecked | Unchecked | NA            | No  | Unchecked | Unchecked |
| Unchecked | Unchecked | Checked   | second degre  | No  | Unchecked | Unchecked |
| Checked   | Unchecked | Unchecked | NA            | No  | Unchecked | Unchecked |
| Unchecked | Checked   | Checked   | A-Fib, periph | Yes | Unchecked | Checked   |
| Unchecked | Unchecked | Unchecked | NA            | No  | Unchecked | Unchecked |
| Unchecked | Unchecked | Checked   | Chronic A-FIB | No  | Unchecked | Unchecked |
| Checked   | Unchecked | Unchecked | NA            | No  | Unchecked | Unchecked |
| Unchecked | Unchecked | Unchecked | NA            | No  | Unchecked | Unchecked |
| Unchecked | Unchecked | Unchecked | NA            | No  | Unchecked | Unchecked |
| Unchecked | Unchecked | Unchecked | NA            | Yes | Unchecked | Unchecked |
| Unchecked | Unchecked | Unchecked | NA            | No  | Unchecked | Unchecked |
| Checked   | Unchecked | Checked   | Non- STEMI    | No  | Unchecked | Unchecked |
| Unchecked | Unchecked | Unchecked | NA            | No  | Unchecked | Unchecked |
| Unchecked | Unchecked | Unchecked | NA            | No  | Unchecked | Unchecked |
| Unchecked | Unchecked | Unchecked | NA            | No  | Unchecked | Unchecked |
| Unchecked | Unchecked | Unchecked | NA            | No  | Unchecked | Unchecked |
| Unchecked | Unchecked | Unchecked | NA            | No  | Unchecked | Unchecked |
| Unchecked | Unchecked | Checked   | cardiomyopa   | Yes | Unchecked | Checked   |
| Unchecked | Unchecked | Unchecked | NA            | No  | Unchecked | Unchecked |
| Unchecked | Unchecked | Checked   | CVA, PE DVT   | No  | Unchecked | Unchecked |

|           |           |           |               |     |           |           |
|-----------|-----------|-----------|---------------|-----|-----------|-----------|
| Unchecked | Unchecked | Unchecked | NA            | No  | Unchecked | Unchecked |
| Checked   | Unchecked | Checked   | High Cholest  | No  | Unchecked | Unchecked |
| Unchecked | Unchecked | Unchecked | NA            | Yes | Unchecked | Checked   |
| Unchecked | Unchecked | Unchecked | NA            | No  | Unchecked | Unchecked |
| Unchecked | Unchecked | Checked   | High Cholest  | No  | Unchecked | Unchecked |
| Unchecked | Unchecked | Unchecked | NA            | No  | Unchecked | Unchecked |
| Unchecked | Unchecked | Unchecked | NA            | Yes | Checked   | Unchecked |
| Checked   | Unchecked | Checked   | TIA, Afib,    | No  | Unchecked | Unchecked |
| Unchecked | Unchecked | Unchecked | NA            | No  | Unchecked | Unchecked |
| Checked   | Checked   | Unchecked | NA            | No  | Unchecked | Unchecked |
| Unchecked | Unchecked | Unchecked | NA            | No  | Unchecked | Unchecked |
| Unchecked | Unchecked | Unchecked | NA            | No  | Unchecked | Unchecked |
| Unchecked | Unchecked | Unchecked | NA            | No  | Unchecked | Unchecked |
| Unchecked | Unchecked | Unchecked | NA            | No  | Unchecked | Unchecked |
| Unchecked | Unchecked | Unchecked | NA            | Yes | Unchecked | Checked   |
| Checked   | Unchecked | Checked   | afib, pacema  | No  | Unchecked | Unchecked |
| Unchecked | Unchecked | Checked   | High Cholest  | No  | Unchecked | Unchecked |
| Unchecked | Unchecked | Checked   | cardiac ablat | No  | Unchecked | Unchecked |
| Unchecked | Unchecked | Unchecked | NA            | No  | Unchecked | Unchecked |
| Unchecked | Unchecked | Unchecked | NA            | No  | Unchecked | Unchecked |
| Unchecked | Unchecked | Unchecked | NA            | No  | Unchecked | Unchecked |
| Unchecked | Unchecked | Unchecked | NA            | No  | Unchecked | Unchecked |
| Checked   | Checked   | Checked   | High cholest  | Yes | Unchecked | Checked   |
| Unchecked | Unchecked | Unchecked | NA            | No  | Unchecked | Unchecked |
| Unchecked | Unchecked | Checked   | hyperlipidem  | No  | Unchecked | Unchecked |
| Unchecked | Unchecked | Unchecked | NA            | No  | Unchecked | Unchecked |
| Unchecked | Unchecked | Unchecked | NA            | No  | Unchecked | Unchecked |
| Unchecked | Unchecked | Checked   | High cholest  | No  | Unchecked | Unchecked |
| Unchecked | Unchecked | Checked   | High Cholest  | No  | Unchecked | Unchecked |
| Checked   | Unchecked | Checked   | High cholest  | No  | Unchecked | Unchecked |
| Checked   | Unchecked | Checked   | High Cholest  | No  | Unchecked | Unchecked |
| Unchecked | Unchecked | Unchecked | NA            | No  | Unchecked | Unchecked |
| Unchecked | Checked   | Checked   | A fib         | Yes | Unchecked | Checked   |
| Unchecked | Unchecked | Unchecked | NA            | No  | Unchecked | Unchecked |
| Checked   | Unchecked | Unchecked | NA            | No  | Unchecked | Unchecked |
| Unchecked | Unchecked | Unchecked | NA            | Yes | Checked   | Unchecked |
| Unchecked | Unchecked | Unchecked | NA            | Yes | Checked   | Unchecked |
| Unchecked | Unchecked | Unchecked | NA            | No  | Unchecked | Unchecked |
| Unchecked | Checked   | Unchecked | NA            | No  | Unchecked | Unchecked |
| Unchecked | Unchecked | Checked   | cardiomyopa   | No  | Unchecked | Unchecked |
| Unchecked | Unchecked | Unchecked | NA            | No  | Unchecked | Unchecked |
| Unchecked | Unchecked | Unchecked | NA            | Yes | Checked   | Unchecked |
| Unchecked | Unchecked | Unchecked | NA            | No  | Unchecked | Unchecked |
| Unchecked | Unchecked | Unchecked | NA            | No  | Unchecked | Unchecked |
| Unchecked | Unchecked | Unchecked | NA            | No  | Unchecked | Unchecked |

















|           |           |           |                 |     |           |           |
|-----------|-----------|-----------|-----------------|-----|-----------|-----------|
| Unchecked | Unchecked | Unchecked | NA              | No  | Unchecked | Unchecked |
| Unchecked | Unchecked | Unchecked | NA              | No  | Unchecked | Unchecked |
| Unchecked | Unchecked | Unchecked | NA              | No  | Unchecked | Unchecked |
| Unchecked | Unchecked | Unchecked | NA              | Yes | Checked   | Unchecked |
| Unchecked | Unchecked | Checked   | Hyperlipidem    | No  | Unchecked | Unchecked |
| Unchecked | Unchecked | Unchecked | NA              | No  | Unchecked | Unchecked |
| Unchecked | Unchecked | Checked   | high cholestr   | No  | Unchecked | Unchecked |
| Unchecked | Unchecked | Unchecked | NA              | Yes | Checked   | Checked   |
| Checked   | Unchecked | Unchecked | NA              | No  | Unchecked | Unchecked |
| Checked   | Unchecked | Checked   | hyperlipidem    | Yes | Unchecked | Checked   |
| Checked   | Unchecked | Unchecked | NA              | Yes | Unchecked | Checked   |
| Checked   | Unchecked | Checked   | ACS, hyperlij   | No  | Unchecked | Unchecked |
| Checked   | Unchecked | Checked   | hyperlipidem    | Yes | Unchecked | Unchecked |
| Unchecked | Unchecked | Unchecked | NA              | Yes | Checked   | Unchecked |
| Unchecked | Unchecked | Unchecked | NA              | Yes | Unchecked | Unchecked |
| Unchecked | Unchecked | Unchecked | NA              | No  | Unchecked | Unchecked |
| Unchecked | Unchecked | Unchecked | NA              | No  | Unchecked | Unchecked |
| Unchecked | Unchecked | Checked   | hyperlipidem    | No  | Unchecked | Unchecked |
| Checked   | Unchecked | Checked   | hyperlipidem    | Yes | Checked   | Checked   |
| Unchecked | Unchecked | Unchecked | NA              | No  | Unchecked | Unchecked |
| Checked   | Checked   | Unchecked | NA              | Yes | Unchecked | Checked   |
| Unchecked | Unchecked | Checked   | hyperlipidem    | No  | Unchecked | Unchecked |
| Unchecked | Unchecked | Unchecked | NA              | Yes | Unchecked | Unchecked |
| Unchecked | Unchecked | Checked   | hyperlipidem    | No  | Unchecked | Unchecked |
| Unchecked | Unchecked | Checked   | hyperlipidem    | Yes | Checked   | Unchecked |
| Unchecked | Unchecked | Unchecked | NA              | Yes | Checked   | Unchecked |
| Unchecked | Unchecked | Checked   | hyperlipidem    | No  | Unchecked | Unchecked |
| Unchecked | Unchecked | Checked   | A-Fib           | No  | Unchecked | Unchecked |
| Unchecked | Unchecked | Checked   | hyperlipidem    | No  | Unchecked | Unchecked |
| Unchecked | Unchecked | Checked   | PVD             | Yes | Unchecked | Checked   |
| Unchecked | Unchecked | Unchecked | NA              | Yes | Checked   | Unchecked |
| Unchecked | Unchecked | Checked   | stroke          | No  | Unchecked | Unchecked |
| Unchecked | Unchecked | Checked   | A-Fib           | No  | Unchecked | Unchecked |
| Unchecked | Unchecked | Checked   | A-Fib           | No  | Unchecked | Unchecked |
| Checked   | Unchecked | Checked   | PVD             | No  | Unchecked | Unchecked |
| Unchecked | Unchecked | Checked   | A-Fib           | No  | Unchecked | Unchecked |
| Unchecked | Unchecked | Checked   | atrial fibrilla | No  | Unchecked | Unchecked |
| Unchecked | Unchecked | Checked   | hyperlipidem    | No  | Unchecked | Unchecked |
| Unchecked | Unchecked | Unchecked | NA              | Yes | Unchecked | Unchecked |
| Checked   | Unchecked | Unchecked | NA              | Yes | Unchecked | Unchecked |
| Unchecked | Unchecked | Unchecked | NA              | No  | Unchecked | Unchecked |
| Unchecked | Unchecked | Unchecked | NA              | No  | Unchecked | Unchecked |
| Unchecked | Unchecked | Unchecked | NA              | No  | Unchecked | Unchecked |
| Unchecked | Unchecked | Unchecked | NA              | No  | Unchecked | Unchecked |
| Unchecked | Unchecked | Checked   | high cholestr   | No  | Unchecked | Unchecked |

|           |           |           |               |     |           |           |
|-----------|-----------|-----------|---------------|-----|-----------|-----------|
| Unchecked | Unchecked | Unchecked | NA            | No  | Unchecked | Unchecked |
| Unchecked | Unchecked | Checked   | hyperlipidem  | Yes | Unchecked | Checked   |
| Unchecked | Unchecked | Unchecked | NA            | No  | Unchecked | Unchecked |
| Unchecked | Unchecked | Unchecked | NA            | No  | Unchecked | Unchecked |
| Unchecked | Unchecked | Unchecked | NA            | No  | Unchecked | Unchecked |
| Unchecked | Unchecked | Unchecked | NA            | Yes | Unchecked | Unchecked |
| Unchecked | Unchecked | Checked   | recent CVA    | Yes | Unchecked | Checked   |
| Unchecked | Unchecked | Unchecked | NA            | No  | Unchecked | Unchecked |
| Unchecked | Unchecked | Checked   | high cholestr | Yes | Checked   | Unchecked |
| Unchecked | Unchecked | Unchecked | NA            | Yes | Checked   | Unchecked |
| Unchecked | Unchecked | Unchecked | NA            | No  | Unchecked | Unchecked |
| Checked   | Checked   | Checked   | high cholestr | No  | Unchecked | Unchecked |
| Unchecked | Unchecked | Checked   | high cholestr | No  | Unchecked | Unchecked |
| Checked   | Checked   | Checked   | hyperlipidem  | No  | Unchecked | Unchecked |
| Unchecked | Unchecked | Unchecked | NA            | No  | Unchecked | Unchecked |
| Unchecked | Unchecked | Unchecked | NA            | No  | Unchecked | Unchecked |
| Unchecked | Unchecked | Unchecked | NA            | No  | Unchecked | Unchecked |
| Checked   | Checked   | Unchecked | NA            | Yes | Checked   | Unchecked |
| Unchecked | Unchecked | Checked   | hyperlipidem  | No  | Unchecked | Unchecked |
| Checked   | Unchecked | Checked   | hyperlipidem  | No  | Unchecked | Unchecked |
| Unchecked | Unchecked | Unchecked | NA            | No  | Unchecked | Unchecked |
| Unchecked | Unchecked | Unchecked | NA            | No  | Unchecked | Unchecked |
| Unchecked | Unchecked | Unchecked | NA            | No  | Unchecked | Unchecked |
| Checked   | Checked   | Checked   | hyperlipidem  | No  | Unchecked | Unchecked |
| Unchecked | Unchecked | Unchecked | NA            | No  | Unchecked | Unchecked |
| Unchecked | Checked   | Unchecked | NA            | Yes | Unchecked | Checked   |
| Unchecked | Unchecked | Unchecked | NA            | No  | Unchecked | Unchecked |
| Unchecked | Unchecked | Unchecked | NA            | No  | Unchecked | Unchecked |
| Unchecked | Unchecked | Unchecked | NA            | Yes | Checked   | Unchecked |
| Unchecked | Unchecked | Unchecked | NA            | No  | Unchecked | Unchecked |
| Unchecked | Unchecked | Unchecked | NA            | No  | Unchecked | Unchecked |
| Unchecked | Unchecked | Checked   | hyperlipidem  | No  | Unchecked | Unchecked |
| Unchecked | Unchecked | Checked   | hyperlipidem  | No  | Unchecked | Unchecked |
| Unchecked | Unchecked | Checked   | high cholestr | Yes | Unchecked | Unchecked |
| Checked   | Unchecked | Checked   | cardiac stent | No  | Unchecked | Unchecked |
| Unchecked | Unchecked | Unchecked | NA            | Yes | Checked   | Unchecked |
| Unchecked | Unchecked | Checked   | hyperlipidem  | No  | Unchecked | Unchecked |
| Unchecked | Unchecked | Unchecked | NA            | No  | Unchecked | Unchecked |
| Checked   | Unchecked | Checked   | hyperlipidem  | No  | Unchecked | Unchecked |
| Unchecked | Unchecked | Checked   | mitral valve  | No  | Unchecked | Unchecked |
| Checked   | Checked   | Checked   | A-Fib         | Yes | Checked   | Unchecked |
| Unchecked | Unchecked | Unchecked | NA            | No  | Unchecked | Unchecked |
| Unchecked | Unchecked | Unchecked | NA            | No  | Unchecked | Unchecked |
| Unchecked | Unchecked | Unchecked | NA            | No  | Unchecked | Unchecked |



|           |           |           |               |     |           |           |
|-----------|-----------|-----------|---------------|-----|-----------|-----------|
| Unchecked | Unchecked | Unchecked | NA            | No  | Unchecked | Unchecked |
| Unchecked | Unchecked | Unchecked | NA            | No  | Unchecked | Unchecked |
| Checked   | Unchecked | Checked   | hyperlipidem  | No  | Unchecked | Unchecked |
| Unchecked | Unchecked | Unchecked | NA            | No  | Unchecked | Unchecked |
| Unchecked | Unchecked | Checked   | A-Fib         | Yes | Unchecked | Unchecked |
| Unchecked | Unchecked | Unchecked | NA            | No  | Unchecked | Unchecked |
| Unchecked | Unchecked | Unchecked | NA            | No  | Unchecked | Unchecked |
| Unchecked | Unchecked | Unchecked | NA            | No  | Unchecked | Unchecked |
| Unchecked | Unchecked | Unchecked | NA            | No  | Unchecked | Unchecked |
| Unchecked | Unchecked | Checked   | hyperlipidem  | Yes | Unchecked | Unchecked |
| Unchecked | Unchecked | Unchecked | NA            | No  | Unchecked | Unchecked |
| Unchecked | Unchecked | Unchecked | NA            | No  | Unchecked | Unchecked |
| Unchecked | Unchecked | Unchecked | NA            | No  | Unchecked | Unchecked |
| Unchecked | Unchecked | Unchecked | NA            | No  | Unchecked | Unchecked |
| Unchecked | Unchecked | Checked   | hyperlipidem  | No  | Unchecked | Unchecked |
| Unchecked | Unchecked | Unchecked | NA            | No  | Unchecked | Unchecked |
| Checked   | Checked   | Unchecked | NA            | No  | Unchecked | Unchecked |
| Unchecked | Unchecked | Unchecked | NA            | Yes | Unchecked | Checked   |
| Unchecked | Unchecked | Checked   | A-Fib         | No  | Unchecked | Unchecked |
| Unchecked | Unchecked | Checked   | A-Fib         | No  | Unchecked | Unchecked |
| Checked   | Checked   | Checked   | hyperlipidem  | No  | Unchecked | Unchecked |
| Unchecked | Unchecked | Checked   | hyperlipidem  | No  | Unchecked | Unchecked |
| Unchecked | Unchecked | Checked   | lipidemia     | No  | Unchecked | Unchecked |
| Unchecked | Unchecked | Unchecked | NA            | No  | Unchecked | Unchecked |
| Unchecked | Unchecked | Unchecked | NA            | No  | Unchecked | Unchecked |
| Unchecked | Unchecked | Checked   | heart murmur  | No  | Unchecked | Unchecked |
| Unchecked | Unchecked | Unchecked | NA            | No  | Unchecked | Unchecked |
| Checked   | Unchecked | Checked   | HLD, afib?, C | Yes | Unchecked | Checked   |
| Unchecked | Unchecked | Unchecked | NA            | No  | Unchecked | Unchecked |
| Unchecked | Unchecked | Checked   | HLD           | No  | Unchecked | Unchecked |
| Unchecked | Unchecked | Unchecked | NA            | No  | Unchecked | Unchecked |
| Unchecked | Unchecked | Checked   | HLD           | No  | Unchecked | Unchecked |
| Unchecked | Unchecked | Checked   | HLD           | No  | Unchecked | Unchecked |
| Unchecked | Unchecked | Unchecked | NA            | No  | Unchecked | Unchecked |
| Unchecked | Unchecked | Checked   | dyslipidemia  | No  | Unchecked | Unchecked |
| Unchecked | Unchecked | Checked   | HLD, pacema   | No  | Unchecked | Unchecked |
| Unchecked | Unchecked | Unchecked | NA            | No  | Unchecked | Unchecked |
| Unchecked | Unchecked | Checked   | HLD           | Yes | Checked   | Unchecked |
| Unchecked | Unchecked | Unchecked | NA            | No  | Unchecked | Unchecked |
| Unchecked | Unchecked | Checked   | HLD           | Yes | Unchecked | Unchecked |
| Unchecked | Unchecked | Checked   | HLD           | No  | Unchecked | Unchecked |
| Unchecked | Unchecked | Checked   | HLD           | No  | Unchecked | Unchecked |
| Unchecked | Checked   | Checked   | vasculopathy  | No  | Unchecked | Unchecked |
| Unchecked | Unchecked | Checked   | HLD           | No  | Unchecked | Unchecked |
| Unchecked | Unchecked | Checked   | HLD, afib     | No  | Unchecked | Unchecked |

|           |           |           |                 |     |           |           |
|-----------|-----------|-----------|-----------------|-----|-----------|-----------|
| Unchecked | Unchecked | Unchecked | NA              | No  | Unchecked | Unchecked |
| Unchecked | Unchecked | Unchecked | NA              | No  | Unchecked | Unchecked |
| Unchecked | Unchecked | Checked   | HLD             | No  | Unchecked | Unchecked |
| Checked   | Unchecked | Checked   | HLD, stents     | No  | Unchecked | Unchecked |
| Unchecked | Unchecked | Checked   | dyslipidemia    | Yes | Unchecked | Checked   |
| Unchecked | Unchecked | Checked   | HLD             | No  | Unchecked | Unchecked |
| Unchecked | Unchecked | Unchecked | NA              | Yes | Checked   | Unchecked |
| Unchecked | Unchecked | Unchecked | NA              | Yes | Checked   | Unchecked |
| Unchecked | Unchecked | Checked   | HLD             | No  | Unchecked | Unchecked |
| Unchecked | Unchecked | Checked   | atrial fibrilla | Yes | Unchecked | Checked   |
| Unchecked | Unchecked | Checked   | atrial fibrilla | No  | Unchecked | Unchecked |
| Checked   | Unchecked | Checked   | HLD, stents     | No  | Unchecked | Unchecked |
| Unchecked | Unchecked | Checked   | HLD             | No  | Unchecked | Unchecked |
| Unchecked | Checked   | Checked   | AICD            | No  | Unchecked | Unchecked |
| Unchecked | Unchecked | Unchecked | NA              | No  | Unchecked | Unchecked |
| Unchecked | Unchecked | Unchecked | NA              | No  | Unchecked | Unchecked |
| Unchecked | Unchecked | Unchecked | NA              | No  | Unchecked | Unchecked |
| Checked   | Unchecked | Checked   | hypercholest    | Yes | Checked   | Unchecked |
| Unchecked | Unchecked | Unchecked | NA              | No  | Unchecked | Unchecked |
| Unchecked | Unchecked | Unchecked | NA              | No  | Unchecked | Unchecked |
| Unchecked | Unchecked | Checked   | HLD, A Fib      | No  | Unchecked | Unchecked |
| Unchecked | Unchecked | Checked   | HLD, Afib       | No  | Unchecked | Unchecked |
| Unchecked | Unchecked | Unchecked | NA              | Yes | Unchecked | Checked   |
| Unchecked | Unchecked | Unchecked | NA              | No  | Unchecked | Unchecked |
| Checked   | Unchecked | Checked   | CABG, Afib, i   | No  | Unchecked | Unchecked |
| Checked   | Unchecked | Checked   | HLD, 3 stents   | No  | Unchecked | Unchecked |
| Unchecked | Unchecked | Unchecked | NA              | No  | Unchecked | Unchecked |
| Unchecked | Unchecked | Checked   | pulmonary H     | Yes | Unchecked | Checked   |
| Unchecked | Checked   | Unchecked | NA              | Yes | Unchecked | Checked   |
| Unchecked | Unchecked | Checked   | HLD             | Yes | Unchecked | Unchecked |
| Unchecked | Unchecked | Checked   | pacemaker       | No  | Unchecked | Unchecked |
| Checked   | Unchecked | Checked   | HLD             | No  | Unchecked | Unchecked |
| Unchecked | Unchecked | Checked   | HLD             | No  | Unchecked | Unchecked |
| Unchecked | Unchecked | Unchecked | NA              | No  | Unchecked | Unchecked |
| Unchecked | Unchecked | Checked   | HLD             | No  | Unchecked | Unchecked |
| Unchecked | Unchecked | Checked   | HLD             | No  | Unchecked | Unchecked |
| Unchecked | Unchecked | Checked   | enlarged hea    | Yes | Unchecked | Unchecked |
| Unchecked | Unchecked | Checked   | high cholest    | Yes | Unchecked | Unchecked |
| Unchecked | Unchecked | Checked   | HLD             | No  | Unchecked | Unchecked |
| Unchecked | Unchecked | Checked   | hypercholest    | No  | Unchecked | Unchecked |
| Checked   | Unchecked | Checked   | HLD, atrial fil | No  | Unchecked | Unchecked |
| Checked   | Checked   | Checked   | AF, PPM         | Yes | Unchecked | Checked   |
| Unchecked | Unchecked | Unchecked | NA              | No  | Unchecked | Unchecked |
| Unchecked | Unchecked | Unchecked | NA              | No  | Unchecked | Unchecked |
| Unchecked | Unchecked | Unchecked | NA              | No  | Unchecked | Unchecked |

|           |           |           |              |    |           |           |
|-----------|-----------|-----------|--------------|----|-----------|-----------|
| Unchecked | Unchecked | Unchecked | NA           | No | Unchecked | Unchecked |
| Unchecked | Unchecked | Checked   | hyperlipidem | No | Unchecked | Unchecked |
| Unchecked | Unchecked | Checked   | hyperlipidem | No | Unchecked | Unchecked |
| Unchecked | Unchecked | Unchecked | NA           | No | Unchecked | Unchecked |
| Unchecked | Unchecked | Unchecked | NA           | No | Unchecked | Unchecked |
| Unchecked | Unchecked | Unchecked | NA           | No | Unchecked | Unchecked |
| Checked   | Unchecked | Checked   | CABG         | No | Unchecked | Unchecked |















































































































|                |     |           |           |           |     |     |
|----------------|-----|-----------|-----------|-----------|-----|-----|
| NA             | No  | Unchecked | Unchecked | Unchecked | NA  | No  |
| NA             | No  | Unchecked | Unchecked | Unchecked | NA  | No  |
| NA             | No  | Unchecked | Unchecked | Unchecked | NA  | No  |
| NA             | No  | Unchecked | Unchecked | Unchecked | NA  | No  |
| NA             | No  | Unchecked | Unchecked | Unchecked | NA  | No  |
| NA             | No  | Unchecked | Unchecked | Unchecked | NA  | No  |
| NA             | No  | Unchecked | Unchecked | Unchecked | NA  | No  |
| NA             | No  | Unchecked | Unchecked | Unchecked | NA  | No  |
| NA             | No  | Unchecked | Unchecked | Unchecked | NA  | Yes |
| NA             | No  | Unchecked | Unchecked | Unchecked | NA  | No  |
| NA             | Yes | Checked   | Unchecked | Unchecked | NA  | No  |
| NA             | Yes | Checked   | Unchecked | Unchecked | NA  | No  |
| NA             | No  | Unchecked | Unchecked | Unchecked | NA  | No  |
| NA             | No  | Unchecked | Unchecked | Unchecked | NA  | No  |
| NA             | No  | Unchecked | Unchecked | Unchecked | NA  | No  |
| NA             | No  | Unchecked | Unchecked | Unchecked | NA  | No  |
| NA             | No  | Unchecked | Unchecked | Unchecked | NA  | No  |
| NA             | Yes | Checked   | Unchecked | Unchecked | NA  | No  |
| sarcoid        | Yes | Unchecked | Unchecked | Checked   | aki | No  |
| NA             | No  | Unchecked | Unchecked | Unchecked | NA  | No  |
| NA             | No  | Unchecked | Unchecked | Unchecked | NA  | No  |
| NA             | No  | Unchecked | Unchecked | Unchecked | NA  | No  |
| NA             | No  | Unchecked | Unchecked | Unchecked | NA  | No  |
| NA             | No  | Unchecked | Unchecked | Unchecked | NA  | No  |
| NA             | Yes | Unchecked | Unchecked | Checked   | aki | No  |
| NA             | Yes | Unchecked | Unchecked | Checked   | aki | No  |
| NA             | Yes | Checked   | Unchecked | Unchecked | NA  | No  |
| NA             | Yes | Checked   | Unchecked | Unchecked | NA  | No  |
| NA             | No  | Unchecked | Unchecked | Unchecked | NA  | No  |
| NA             | No  | Unchecked | Unchecked | Unchecked | NA  | Yes |
| immunother:    | No  | Unchecked | Unchecked | Unchecked | NA  | No  |
| NA             | No  | Unchecked | Unchecked | Unchecked | NA  | No  |
| NA             | No  | Unchecked | Unchecked | Unchecked | NA  | No  |
| NA             | No  | Unchecked | Unchecked | Unchecked | NA  | No  |
| NA             | No  | Unchecked | Unchecked | Unchecked | NA  | No  |
| NA             | No  | Unchecked | Unchecked | Unchecked | NA  | No  |
| NA             | Yes | Checked   | Unchecked | Checked   | AKI | No  |
| rheumatica     | No  | Unchecked | Unchecked | Unchecked | NA  | No  |
| NA             | No  | Unchecked | Unchecked | Unchecked | NA  | No  |
| NA             | Yes | Checked   | Unchecked | Unchecked | NA  | No  |
| NA             | Yes | Unchecked | Unchecked | Checked   | aki | No  |
| NA             | No  | Unchecked | Unchecked | Unchecked | NA  | No  |
| NA             | No  | Unchecked | Unchecked | Unchecked | NA  | No  |
| NA             | No  | Unchecked | Unchecked | Unchecked | NA  | No  |
| sickle cell an | No  | Unchecked | Unchecked | Unchecked | NA  | No  |
| NA             | No  | Unchecked | Unchecked | Unchecked | NA  | No  |
| non hodgkins   | No  | Unchecked | Unchecked | Unchecked | NA  | No  |





|               |     |           |           |           |               |     |
|---------------|-----|-----------|-----------|-----------|---------------|-----|
| NA            | Yes | Checked   | Unchecked | Checked   | obstructive u | No  |
| NA            | No  | Unchecked | Unchecked | Unchecked | NA            | No  |
| NA            | No  | Unchecked | Unchecked | Unchecked | NA            | No  |
| lupus         | No  | Unchecked | Unchecked | Unchecked | NA            | No  |
| NA            | Yes | Checked   | Unchecked | Unchecked | NA            | No  |
| NA            | No  | Unchecked | Unchecked | Unchecked | NA            | No  |
| NA            | No  | Unchecked | Unchecked | Unchecked | NA            | No  |
| NA            | No  | Unchecked | Unchecked | Unchecked | NA            | No  |
| NA            | No  | Unchecked | Unchecked | Unchecked | NA            | No  |
| NA            | No  | Unchecked | Unchecked | Unchecked | NA            | No  |
| NA            | No  | Unchecked | Unchecked | Unchecked | NA            | No  |
| NA            | No  | Unchecked | Unchecked | Unchecked | NA            | Yes |
| NA            | No  | Unchecked | Unchecked | Unchecked | NA            | No  |
| NA            | Yes | Unchecked | Checked   | Unchecked | NA            | No  |
| rheumatoid a  | No  | Unchecked | Unchecked | Unchecked | NA            | No  |
| NA            | No  | Unchecked | Unchecked | Unchecked | NA            | No  |
| NA            | Yes | Unchecked | Checked   | Unchecked | NA            | No  |
| NA            | Yes | Unchecked | Checked   | Unchecked | NA            | No  |
| NA            | No  | Unchecked | Unchecked | Unchecked | NA            | No  |
| NA            | No  | Unchecked | Unchecked | Unchecked | NA            | No  |
| NA            | No  | Unchecked | Unchecked | Unchecked | NA            | No  |
| NA            | Yes | Unchecked | Checked   | Unchecked | NA            | No  |
| chronic stero | Yes | Checked   | Unchecked | Unchecked | NA            | No  |
| NA            | No  | Unchecked | Unchecked | Unchecked | NA            | No  |
| NA            | Yes | Checked   | Unchecked | Unchecked | NA            | No  |
| NA            | No  | Unchecked | Unchecked | Unchecked | NA            | No  |
| NA            | No  | Unchecked | Unchecked | Unchecked | NA            | Yes |
| NA            | No  | Unchecked | Unchecked | Unchecked | NA            | No  |
| NA            | Yes | Checked   | Unchecked | Unchecked | NA            | No  |
| NA            | No  | Unchecked | Unchecked | Unchecked | NA            | No  |
| myasthenia {  | No  | Unchecked | Unchecked | Unchecked | NA            | No  |
| NA            | No  | Unchecked | Unchecked | Unchecked | NA            | No  |
| NA            | No  | Unchecked | Unchecked | Unchecked | NA            | No  |
| NA            | No  | Unchecked | Unchecked | Unchecked | NA            | No  |
| NA            | No  | Unchecked | Unchecked | Unchecked | NA            | No  |
| NA            | No  | Unchecked | Unchecked | Unchecked | NA            | No  |
| NA            | No  | Unchecked | Unchecked | Unchecked | NA            | No  |
| NA            | No  | Unchecked | Unchecked | Unchecked | NA            | No  |
| NA            | No  | Unchecked | Unchecked | Unchecked | NA            | No  |
| NA            | No  | Unchecked | Unchecked | Unchecked | NA            | No  |
| NA            | Yes | Checked   | Unchecked | Unchecked | NA            | No  |
| NA            | No  | Unchecked | Unchecked | Unchecked | NA            | No  |
| NA            | No  | Unchecked | Unchecked | Unchecked | NA            | No  |
| crohn's disea | No  | Unchecked | Unchecked | Unchecked | NA            | No  |



|    |     |           |           |           |                |    |
|----|-----|-----------|-----------|-----------|----------------|----|
| NA | No  | Unchecked | Unchecked | Unchecked | NA             | No |
| NA | No  | Unchecked | Unchecked | Unchecked | NA             | No |
| NA | No  | Unchecked | Unchecked | Unchecked | NA             | No |
| NA | Yes | Unchecked | Checked   | Checked   | polycystic kic | No |
| NA | No  | Unchecked | Unchecked | Unchecked | NA             | No |
| NA | No  | Unchecked | Unchecked | Unchecked | NA             | No |
| NA | No  | Unchecked | Unchecked | Unchecked | NA             | No |



























































|           |           |           |           |    |     |           |
|-----------|-----------|-----------|-----------|----|-----|-----------|
| Unchecked | Unchecked | Unchecked | Unchecked | NA | No  | Unchecked |
| Unchecked | Unchecked | Unchecked | Unchecked | NA | Yes | Unchecked |
| Unchecked | Unchecked | Unchecked | Unchecked | NA | Yes | Unchecked |
| Unchecked | Unchecked | Unchecked | Unchecked | NA | Yes | Unchecked |
| Unchecked | Unchecked | Unchecked | Unchecked | NA | No  | Unchecked |
| Unchecked | Unchecked | Unchecked | Unchecked | NA | No  | Unchecked |
| Unchecked | Unchecked | Unchecked | Unchecked | NA | Yes | Unchecked |

|           |           |           |             |     |          |       |
|-----------|-----------|-----------|-------------|-----|----------|-------|
| Unchecked | Checked   | Unchecked | NA          | No  | Complete | 100   |
| Unchecked | Unchecked | Unchecked | NA          | No  | Complete | 98.1  |
| Unchecked | Unchecked | Unchecked | NA          | No  | Complete | 98    |
| Unchecked | Unchecked | Unchecked | NA          | No  | Complete | 98.7  |
| Unchecked | Unchecked | Unchecked | NA          | No  | Complete | 100.9 |
| Unchecked | Unchecked | Checked   | hypothyroid | Yes | Complete | 99.1  |
| Unchecked | Unchecked | Unchecked | NA          | No  | Complete | 98.8  |
| Unchecked | Unchecked | Unchecked | NA          | No  | Complete | 98.3  |
| Unchecked | Unchecked | Unchecked | NA          | No  | Complete | 100.4 |
| Unchecked | Unchecked | Unchecked | NA          | No  | Complete | 99.4  |
| Unchecked | Unchecked | Unchecked | NA          | No  | Complete | 101   |
| Unchecked | Unchecked | Unchecked | NA          | No  | Complete | 98.8  |
| Unchecked | Checked   | Unchecked | NA          | No  | Complete | 97.8  |
| Unchecked | Checked   | Unchecked | NA          | No  | Complete | 102.4 |
| Unchecked | Unchecked | Unchecked | NA          | No  | Complete | 100   |
| Unchecked | Unchecked | Unchecked | NA          | No  | Complete | 98.3  |
| Unchecked | Unchecked | Unchecked | NA          | No  | Complete | 103.8 |
| Unchecked | Checked   | Unchecked | NA          | No  | Complete | 99.8  |
| Unchecked | Unchecked | Checked   | hypothyroid | No  | Complete | 101   |
| Unchecked | Unchecked | Unchecked | NA          | UNK | Complete | 98.7  |
| Unchecked | Checked   | Unchecked | NA          | No  | Complete | 99.4  |
| Checked   | Unchecked | Unchecked | NA          | No  | Complete | 99.7  |
| Unchecked | Unchecked | Unchecked | NA          | No  | Complete | 97.8  |
| Unchecked | Checked   | Unchecked | NA          | No  | Complete | 98.9  |
| Unchecked | Unchecked | Unchecked | NA          | No  | Complete | 99.4  |
| Unchecked | Checked   | Unchecked | NA          | No  | Complete | 97.9  |
| Unchecked | Unchecked | Unchecked | NA          | UNK | Complete | 101   |
| Checked   | Checked   | Unchecked | NA          | UNK | Complete | 98.4  |
| Unchecked | Unchecked | Unchecked | NA          | UNK | Complete | 99.8  |
| Unchecked | Unchecked | Unchecked | NA          | No  | Complete | 98.6  |
| Checked   | Unchecked | Unchecked | NA          | No  | Complete | 102.3 |
| Unchecked | Unchecked | Unchecked | NA          | No  | Complete | 98.1  |
| Unchecked | Unchecked | Checked   | hypothyroid | Yes | Complete | 101.8 |
| Checked   | Checked   | Unchecked | NA          | No  | Complete | 99.9  |
| Unchecked | Checked   | Unchecked | NA          | Yes | Complete | 99.7  |
| Unchecked | Unchecked | Unchecked | NA          | No  | Complete | 99.1  |
| Unchecked | Unchecked | Unchecked | NA          | No  | Complete | 99.6  |
| Unchecked | Unchecked | Unchecked | NA          | No  | Complete | 98.8  |
| Unchecked | Unchecked | Checked   | hypothyroid | No  | Complete | 101   |
| Unchecked | Unchecked | Unchecked | NA          | Yes | Complete | 97.9  |
| Unchecked | Unchecked | Unchecked | NA          | Yes | Complete | 98.2  |
| Unchecked | Unchecked | Unchecked | NA          | Yes | Complete | 97.4  |
| Unchecked | Unchecked | Unchecked | NA          | No  | Complete | 100.6 |
| Unchecked | Unchecked | Unchecked | NA          | Yes | Complete | 98.7  |
| Checked   | Unchecked | Unchecked | NA          | No  | Complete | 99.8  |

|           |           |           |               |     |          |       |
|-----------|-----------|-----------|---------------|-----|----------|-------|
| Unchecked | Unchecked | Unchecked | NA            | No  | Complete | 96.9  |
| Unchecked | Unchecked | Unchecked | NA            | No  | Complete | 98    |
| Unchecked | Checked   | Checked   | hypothyroidis | Yes | Complete | 98.7  |
| Unchecked | Unchecked | Unchecked | NA            | No  | Complete | 103.2 |
| Checked   | Checked   | Unchecked | NA            | No  | Complete | 96.6  |
| Unchecked | Checked   | Unchecked | NA            | No  | Complete | 98    |
| Unchecked | Unchecked | Unchecked | NA            | Yes | Complete | 98.4  |
| Unchecked | Unchecked | Unchecked | NA            | No  | Complete | 98.3  |
| Unchecked | Unchecked | Unchecked | NA            | Yes | Complete | 100.1 |
| Unchecked | Checked   | Unchecked | NA            | No  | Complete | 98.2  |
| Checked   | Unchecked | Unchecked | NA            | No  | Complete | 103   |
| Unchecked | Unchecked | Unchecked | NA            | No  | Complete | 97.6  |
| Unchecked | Unchecked | Unchecked | NA            | No  | Complete | 98.3  |
| Unchecked | Unchecked | Unchecked | NA            | Yes | Complete | 98.8  |
| Unchecked | Unchecked | Unchecked | NA            | UNK | Complete | 102.7 |
| Unchecked | Unchecked | Unchecked | NA            | No  | Complete | 99.7  |
| Unchecked | Unchecked | Unchecked | NA            | No  | Complete | 98.5  |
| Unchecked | Unchecked | Unchecked | NA            | Yes | Complete | 98    |
| Unchecked | Unchecked | Unchecked | NA            | No  | Complete | 98.6  |
| Unchecked | Unchecked | Unchecked | NA            | No  | Complete | 99.3  |
| Unchecked | Unchecked | Unchecked | NA            | No  | Complete | 98.5  |
| Checked   | Unchecked | Unchecked | NA            | No  | Complete | 99.5  |
| Unchecked | Unchecked | Unchecked | NA            | Yes | Complete | 99.5  |
| Unchecked | Unchecked | Unchecked | NA            | No  | Complete | 101.6 |
| Unchecked | Unchecked | Unchecked | NA            | Yes | Complete | 99.1  |
| Unchecked | Unchecked | Unchecked | NA            | No  | Complete | 98.9  |
| Unchecked | Unchecked | Unchecked | NA            | No  | Complete | 98.2  |
| Checked   | Unchecked | Unchecked | NA            | No  | Complete | 97.9  |
| Unchecked | Unchecked | Unchecked | NA            | No  | Complete | 98.4  |
| Unchecked | Checked   | Unchecked | NA            | UNK | Complete | 96    |
| Unchecked | Unchecked | Unchecked | NA            | No  | Complete | 97.5  |
| Checked   | Unchecked | Unchecked | NA            | No  | Complete | 98.1  |
| Unchecked | Unchecked | Unchecked | NA            | Yes | Complete | 101.5 |
| Unchecked | Unchecked | Unchecked | NA            | Yes | Complete | 99.7  |
| Unchecked | Checked   | Unchecked | NA            | Yes | Complete | 98.7  |
| Unchecked | Unchecked | Unchecked | NA            | UNK | Complete | 98    |
| Unchecked | Unchecked | Unchecked | NA            | UNK | Complete | 98.9  |
| Checked   | Unchecked | Unchecked | NA            | No  | Complete | 101.2 |
| Unchecked | Checked   | Unchecked | NA            | No  | Complete | 99.1  |
| Unchecked | Unchecked | Unchecked | NA            | No  | Complete | 98.7  |
| Unchecked | Unchecked | Unchecked | NA            | No  | Complete | 97.5  |
| Unchecked | Unchecked | Unchecked | NA            | Yes | Complete | 97.6  |
| Unchecked | Checked   | Unchecked | NA            | Yes | Complete | 98.1  |
| Unchecked | Unchecked | Unchecked | NA            | Yes | Complete | 99    |
| Unchecked | Unchecked | Unchecked | NA            | No  | Complete | 100.4 |

|           |           |           |             |     |          |       |
|-----------|-----------|-----------|-------------|-----|----------|-------|
| Unchecked | Unchecked | Unchecked | NA          | UNK | Complete | 98.6  |
| Unchecked | Checked   | Unchecked | NA          | UNK | Complete | 101   |
| Checked   | Checked   | Unchecked | NA          | No  | Complete | 97.4  |
| Unchecked | Unchecked | Unchecked | NA          | No  | Complete | 98.5  |
| Unchecked | Unchecked | Unchecked | NA          | No  | Complete | 98.8  |
| Unchecked | Unchecked | Unchecked | NA          | No  | Complete | 98.2  |
| Unchecked | Checked   | Unchecked | NA          | No  | Complete | 98.9  |
| Unchecked | Unchecked | Unchecked | NA          | No  | Complete | 99.9  |
| Checked   | Unchecked | Unchecked | NA          | No  | Complete | 101.1 |
| Unchecked | Unchecked | Unchecked | NA          | Yes | Complete | 100.9 |
| Unchecked | Unchecked | Unchecked | NA          | No  | Complete | 98.6  |
| Unchecked | Unchecked | Unchecked | NA          | Yes | Complete | 97.8  |
| Unchecked | Unchecked | Unchecked | NA          | No  | Complete | 99.2  |
| Unchecked | Checked   | Unchecked | NA          | No  | Complete | 100.5 |
| Unchecked | Unchecked | Unchecked | NA          | Yes | Complete | 98.6  |
| Unchecked | Unchecked | Unchecked | NA          | No  | Complete | 100.9 |
| Unchecked | Unchecked | Unchecked | NA          | No  | Complete | 99    |
| Unchecked | Checked   | Unchecked | NA          | UNK | Complete | 97.8  |
| Unchecked | Unchecked | Unchecked | NA          | Yes | Complete | 97.5  |
| Unchecked | Unchecked | Unchecked | NA          | No  | Complete | 97.3  |
| Unchecked | Unchecked | Unchecked | NA          | No  | Complete | 98.2  |
| Unchecked | Unchecked | Unchecked | NA          | No  | Complete | 98.1  |
| Unchecked | Checked   | Unchecked | NA          | No  | Complete | 98.7  |
| Unchecked | Checked   | Unchecked | NA          | No  | Complete | 99.5  |
| Unchecked | Unchecked | Unchecked | NA          | No  | Complete | 97.9  |
| Unchecked | Unchecked | Unchecked | NA          | No  | Complete | 98.5  |
| Unchecked | Checked   | Unchecked | NA          | UNK | Complete | 98.8  |
| Unchecked | Unchecked | Checked   | gout        | UNK | Complete | 100.1 |
| Unchecked | Checked   | Unchecked | NA          | No  | Complete | 97.9  |
| Checked   | Unchecked | Unchecked | NA          | No  | Complete | 98.3  |
| Unchecked | Unchecked | Unchecked | NA          | No  | Complete | 98.6  |
| Unchecked | Unchecked | Unchecked | NA          | No  | Complete | 99.8  |
| Unchecked | Unchecked | Unchecked | NA          | No  | Complete | 102.8 |
| Unchecked | Unchecked | Unchecked | NA          | No  | Complete | 103   |
| Unchecked | Unchecked | Checked   | hypothyroid | No  | Complete | 99.1  |
| Unchecked | Checked   | Unchecked | NA          | Yes | Complete | 99.3  |
| Unchecked | Checked   | Unchecked | NA          | No  | Complete | 98.5  |
| Unchecked | Unchecked | Checked   | gout        | No  | Complete | 98.1  |
| Checked   | Checked   | Unchecked | NA          | UNK | Complete | 98.1  |
| Checked   | Unchecked | Unchecked | NA          | Yes | Complete | 98.8  |
| Unchecked | Unchecked | Unchecked | NA          | No  | Complete | 98.1  |
| Unchecked | Unchecked | Unchecked | NA          | No  | Complete | 97.9  |
| Unchecked | Checked   | Unchecked | NA          | No  | Complete | 97.5  |
| Unchecked | Unchecked | Unchecked | NA          | UNK | Complete | 99.9  |
| Unchecked | Unchecked | Unchecked | NA          | No  | Complete | 98.7  |

|           |           |           |              |     |          |       |
|-----------|-----------|-----------|--------------|-----|----------|-------|
| Checked   | Unchecked | Unchecked | NA           | Yes | Complete | 98.4  |
| Unchecked | Unchecked | Unchecked | NA           | Yes | Complete | 97.9  |
| Unchecked | Checked   | Unchecked | NA           | No  | Complete | 101.2 |
| Unchecked | Unchecked | Unchecked | NA           | No  | Complete | 102.8 |
| Unchecked | Unchecked | Unchecked | NA           | No  | Complete | 100.3 |
| Unchecked | Unchecked | Unchecked | NA           | Yes | Complete | 98.3  |
| Unchecked | Unchecked | Checked   | hypothyroid  | No  | Complete | 100   |
| Unchecked | Unchecked | Unchecked | NA           | Yes | Complete | 98.2  |
| Unchecked | Checked   | Unchecked | NA           | No  | Complete | 99.5  |
| Unchecked | Unchecked | Unchecked | NA           | No  | Complete | 101.4 |
| Unchecked | Checked   | Unchecked | NA           | No  | Complete | 97.7  |
| Checked   | Checked   | Unchecked | NA           | No  | Complete | 98.8  |
| Unchecked | Unchecked | Unchecked | NA           | No  | Complete | 99    |
| Unchecked | Unchecked | Unchecked | NA           | Yes | Complete | 100.3 |
| Unchecked | Unchecked | Unchecked | NA           | No  | Complete | 100.2 |
| Checked   | Checked   | Unchecked | NA           | No  | Complete | 97.1  |
| Checked   | Unchecked | Unchecked | NA           | Yes | Complete | 101.5 |
| Unchecked | Checked   | Checked   | hyperparathy | No  | Complete | 100.9 |
| Unchecked | Unchecked | Unchecked | NA           | No  | Complete | 102.1 |
| Unchecked | Checked   | Unchecked | NA           | Yes | Complete | 100   |
| Unchecked | Unchecked | Unchecked | NA           | No  | Complete | 99.8  |
| Unchecked | Unchecked | Unchecked | NA           | Yes | Complete | 97.4  |
| Unchecked | Unchecked | Unchecked | NA           | Yes | Complete | 98.5  |
| Checked   | Checked   | Unchecked | NA           | Yes | Complete | 97.8  |
| Unchecked | Checked   | Unchecked | NA           | Yes | Complete | 99.1  |
| Checked   | Unchecked | Checked   | hypothyroid  | Yes | Complete | 99.9  |
| Unchecked | Unchecked | Unchecked | NA           | No  | Complete | 103.5 |
| Checked   | Unchecked | Unchecked | NA           | No  | Complete | 98.8  |
| Unchecked | Unchecked | Unchecked | NA           | UNK | Complete | 98    |
| Unchecked | Unchecked | Unchecked | NA           | UNK | Complete | 98.5  |
| Unchecked | Checked   | Unchecked | NA           | Yes | Complete | 98.3  |
| Unchecked | Unchecked | Unchecked | NA           | UNK | Complete | 98.2  |
| Checked   | Unchecked | Unchecked | NA           | No  | Complete | 97.8  |
| Checked   | Checked   | Unchecked | NA           | No  | Complete | 101   |
| Unchecked | Checked   | Unchecked | NA           | No  | Complete | 97.5  |
| Unchecked | Checked   | Unchecked | NA           | No  | Complete | 101.2 |
| Unchecked | Unchecked | Unchecked | NA           | Yes | Complete | 98.1  |
| Unchecked | Unchecked | Unchecked | NA           | Yes | Complete | 97.7  |
| Unchecked | Unchecked | Unchecked | NA           | No  | Complete | 99.4  |
| Checked   | Unchecked | Unchecked | NA           | No  | Complete | 99.6  |
| Unchecked | Checked   | Unchecked | NA           | No  | Complete | 98.2  |
| Unchecked | Unchecked | Unchecked | NA           | No  | Complete | 99.7  |
| Unchecked | Unchecked | Unchecked | NA           | No  | Complete | 101.3 |
| Unchecked | Unchecked | Unchecked | NA           | Yes | Complete | 99    |
| Unchecked | Unchecked | Unchecked | NA           | No  | Complete | 103   |



|           |           |           |      |     |          |       |
|-----------|-----------|-----------|------|-----|----------|-------|
| Unchecked | Checked   | Unchecked | NA   | No  | Complete | 99    |
| Unchecked | Checked   | Unchecked | NA   | No  | Complete | 97.7  |
| Unchecked | Unchecked | Unchecked | NA   | Yes | Complete | 98.7  |
| Unchecked | Unchecked | Unchecked | NA   | Yes | Complete | 98    |
| Unchecked | Unchecked | Unchecked | NA   | Yes | Complete | 98.5  |
| Checked   | Checked   | Unchecked | NA   | No  | Complete | 99.5  |
| Unchecked | Checked   | Unchecked | NA   | No  | Complete | 101.4 |
| Unchecked | Unchecked | Unchecked | NA   | UNK | Complete | 98.6  |
| Unchecked | Unchecked | Unchecked | NA   | Yes | Complete | 97.9  |
| Unchecked | Unchecked | Unchecked | NA   | No  | Complete | 98    |
| Unchecked | Unchecked | Unchecked | NA   | No  | Complete | 98.5  |
| Unchecked | Unchecked | Unchecked | NA   | No  | Complete | 103.5 |
| Unchecked | Unchecked | Unchecked | NA   | Yes | Complete | 99.3  |
| Unchecked | Unchecked | Unchecked | NA   | Yes | Complete | 98.7  |
| Unchecked | Unchecked | Unchecked | NA   | No  | Complete | 97.8  |
| Unchecked | Unchecked | Unchecked | NA   | No  | Complete | 99.3  |
| Unchecked | Checked   | Unchecked | NA   | No  | Complete | 97.9  |
| Unchecked | Unchecked | Unchecked | NA   | No  | Complete | 101.5 |
| Unchecked | Unchecked | Unchecked | NA   | No  | Complete | 99.2  |
| Unchecked | Unchecked | Unchecked | NA   | UNK | Complete | 99.3  |
| Unchecked | Unchecked | Unchecked | NA   | Yes | Complete | 97.1  |
| Unchecked | Unchecked | Unchecked | NA   | No  | Complete | 99.6  |
| Unchecked | Unchecked | Unchecked | NA   | No  | Complete | 98.7  |
| Unchecked | Unchecked | Unchecked | NA   | Yes | Complete | 99    |
| Unchecked | Unchecked | Unchecked | NA   | No  | Complete | 98.9  |
| Unchecked | Checked   | Unchecked | NA   | No  | Complete | 102.1 |
| Unchecked | Unchecked | Unchecked | NA   | No  | Complete | 101.4 |
| Checked   | Unchecked | Unchecked | NA   | No  | Complete | 101.7 |
| Unchecked | Checked   | Unchecked | NA   | No  | Complete | 102.4 |
| Unchecked | Checked   | Unchecked | NA   | No  | Complete | 98.2  |
| Unchecked | Checked   | Unchecked | NA   | No  | Complete | 98.6  |
| Unchecked | Checked   | Unchecked | NA   | No  | Complete | 98.2  |
| Unchecked | Checked   | Unchecked | NA   | Yes | Complete | 99.1  |
| Unchecked | Unchecked | Unchecked | NA   | Yes | Complete | 97.8  |
| Unchecked | Unchecked | Unchecked | NA   | No  | Complete | 99.5  |
| Unchecked | Unchecked | Checked   | gout | No  | Complete | 98    |
| Unchecked | Checked   | Unchecked | NA   | No  | Complete | 97.8  |
| Unchecked | Checked   | Unchecked | NA   | No  | Complete | 98.8  |
| Unchecked | Checked   | Unchecked | NA   | Yes | Complete | 98.4  |
| Unchecked | Unchecked | Unchecked | NA   | No  | Complete | 99    |
| Unchecked | Unchecked | Unchecked | NA   | No  | Complete | 101.2 |
| Unchecked | Unchecked | Unchecked | NA   | No  | Complete | 97.2  |
| Unchecked | Unchecked | Unchecked | NA   | No  | Complete | 100.3 |
| Checked   | Unchecked | Unchecked | NA   | No  | Complete | 98    |
| Unchecked | Unchecked | Unchecked | NA   | No  | Complete | 97.6  |

|           |           |           |               |     |          |       |
|-----------|-----------|-----------|---------------|-----|----------|-------|
| Unchecked | Checked   | Unchecked | NA            | UNK | Complete | 100.5 |
| Unchecked | Checked   | Unchecked | NA            | No  | Complete | 98.9  |
| Unchecked | Unchecked | Unchecked | NA            | No  | Complete | 102.9 |
| Unchecked | Checked   | Checked   | hypothyroidis | UNK | Complete | 101.8 |
| Unchecked | Unchecked | Checked   | prediabetes   | Yes | Complete | 99.9  |
| Unchecked | Checked   | Unchecked | NA            | No  | Complete | 98.6  |
| Unchecked | Unchecked | Unchecked | NA            | No  | Complete | 98    |
| Checked   | Unchecked | Unchecked | NA            | No  | Complete | 99.9  |
| Unchecked | Checked   | Unchecked | NA            | No  | Complete | 100.4 |
| Unchecked | Checked   | Unchecked | NA            | No  | Complete | 101.8 |
| Unchecked | Checked   | Unchecked | NA            | UNK | Complete | 98.1  |
| Unchecked | Unchecked | Unchecked | NA            | No  | Complete | 102.4 |
| Unchecked | Checked   | Unchecked | NA            | No  | Complete | 101   |
| Unchecked | Unchecked | Unchecked | NA            | No  | Complete | 98.8  |
| Unchecked | Unchecked | Unchecked | NA            | No  | Complete | 101.4 |
| Unchecked | Unchecked | Unchecked | NA            | No  | Complete | 100   |
| Unchecked | Unchecked | Checked   | hypothyroidis | No  | Complete | 103.1 |
| Unchecked | Unchecked | Unchecked | NA            | No  | Complete | 101.3 |
| Unchecked | Checked   | Unchecked | NA            | No  | Complete | 100.1 |
| Unchecked | Unchecked | Unchecked | NA            | UNK | Complete | 98.8  |
| Unchecked | Unchecked | Unchecked | NA            | Yes | Complete | 101.7 |
| Checked   | Checked   | Unchecked | NA            | UNK | Complete | 98.9  |
| Unchecked | Checked   | Unchecked | NA            | No  | Complete | 97.5  |
| Unchecked | Unchecked | Unchecked | NA            | Yes | Complete | 98.3  |
| Unchecked | Unchecked | Unchecked | NA            | No  | Complete | 98.7  |
| Unchecked | Unchecked | Unchecked | NA            | No  | Complete | 97.7  |
| Unchecked | Unchecked | Unchecked | NA            | Yes | Complete | 98.2  |
| Unchecked | Checked   | Unchecked | NA            | Yes | Complete | 99.9  |
| Unchecked | Unchecked | Unchecked | NA            | No  | Complete | 101.1 |
| Unchecked | Unchecked | Unchecked | NA            | UNK | Complete | 97.9  |
| Unchecked | Checked   | Unchecked | NA            | Yes | Complete | 100.7 |
| Unchecked | Unchecked | Unchecked | NA            | No  | Complete | 101   |
| Unchecked | Checked   | Unchecked | NA            | Yes | Complete | 98.7  |
| Unchecked | Unchecked | Unchecked | NA            | UNK | Complete | 98.5  |
| Unchecked | Unchecked | Unchecked | NA            | No  | Complete | 99.4  |
| Unchecked | Checked   | Unchecked | NA            | No  | Complete | 97.9  |
| Unchecked | Unchecked | Unchecked | NA            | No  | Complete | 98.7  |
| Unchecked | Checked   | Unchecked | NA            | Yes | Complete | 97.6  |
| Unchecked | Unchecked | Unchecked | NA            | UNK | Complete | 97.2  |
| Unchecked | Checked   | Unchecked | NA            | No  | Complete | 100.3 |
| Unchecked | Checked   | Unchecked | NA            | No  | Complete | 97.4  |
| Unchecked | Unchecked | Unchecked | NA            | No  | Complete | 101.6 |
| Checked   | Unchecked | Unchecked | NA            | No  | Complete | 99.1  |
| Checked   | Unchecked | Unchecked | NA            | Yes | Complete | 103   |
| Unchecked | Checked   | Unchecked | NA            | No  | Complete | 98.5  |

|           |           |           |    |     |          |       |
|-----------|-----------|-----------|----|-----|----------|-------|
| Unchecked | Unchecked | Unchecked | NA | No  | Complete | 98.8  |
| Unchecked | Unchecked | Unchecked | NA | UNK | Complete | 100.5 |
| Unchecked | Checked   | Unchecked | NA | No  | Complete | 99.4  |
| Unchecked | Checked   | Unchecked | NA | Yes | Complete | 98.3  |
| Unchecked | Unchecked | Unchecked | NA | Yes | Complete | 99.5  |
| Unchecked | Unchecked | Unchecked | NA | No  | Complete | 98.4  |
| Unchecked | Unchecked | Unchecked | NA | No  | Complete | 102.3 |
| Checked   | Checked   | Unchecked | NA | No  | Complete | 102.9 |
| Unchecked | Unchecked | Unchecked | NA | No  | Complete | 97.5  |
| Unchecked | Unchecked | Unchecked | NA | No  | Complete | 97    |
| Unchecked | Unchecked | Unchecked | NA | UNK | Complete | 97.7  |
| Unchecked | Unchecked | Unchecked | NA | No  | Complete | 98.2  |
| Unchecked | Unchecked | Unchecked | NA | No  | Complete | 99.1  |
| Unchecked | Unchecked | Unchecked | NA | Yes | Complete | 99.5  |
| Unchecked | Unchecked | Unchecked | NA | UNK | Complete | 98    |
| Unchecked | Unchecked | Unchecked | NA | UNK | Complete | 97.1  |
| Checked   | Unchecked | Unchecked | NA | No  | Complete | 100.8 |
| Unchecked | Unchecked | Unchecked | NA | Yes | Complete | 97.8  |
| Unchecked | Checked   | Unchecked | NA | No  | Complete | 98.5  |
| Unchecked | Unchecked | Unchecked | NA | UNK | Complete | 105.5 |
| Unchecked | Unchecked | Unchecked | NA | No  | Complete | 97.7  |
| Unchecked | Unchecked | Unchecked | NA | No  | Complete | 101.7 |
| Unchecked | Unchecked | Unchecked | NA | No  | Complete | 102.5 |
| Unchecked | Unchecked | Unchecked | NA | No  | Complete | 98.2  |
| Unchecked | Unchecked | Unchecked | NA | Yes | Complete | 98.1  |
| Unchecked | Unchecked | Unchecked | NA | No  | Complete | 97.5  |
| Checked   | Checked   | Unchecked | NA | No  | Complete | 102.9 |
| Unchecked | Unchecked | Unchecked | NA | No  | Complete | 100.6 |
| Checked   | Checked   | Unchecked | NA | Yes | Complete | 99.1  |
| Unchecked | Unchecked | Unchecked | NA | No  | Complete | 98.4  |
| Unchecked | Unchecked | Unchecked | NA | Yes | Complete | 100.9 |
| Unchecked | Checked   | Unchecked | NA | UNK | Complete | 103.3 |
| Unchecked | Checked   | Unchecked | NA | UNK | Complete | 101   |
| Unchecked | Unchecked | Unchecked | NA | No  | Complete | 99.1  |
| Unchecked | Unchecked | Unchecked | NA | No  | Complete | 97.5  |
| Unchecked | Checked   | Unchecked | NA | UNK | Complete | 97.8  |
| Unchecked | Unchecked | Unchecked | NA | No  | Complete | 97.6  |
| Unchecked | Unchecked | Unchecked | NA | UNK | Complete | 103.1 |
| Unchecked | Checked   | Unchecked | NA | No  | Complete | 102.2 |
| Unchecked | Unchecked | Unchecked | NA | No  | Complete | 98.2  |
| Checked   | Unchecked | Unchecked | NA | Yes | Complete | 98.4  |
| Checked   | Checked   | Unchecked | NA | Yes | Complete | 98.2  |
| Unchecked | Unchecked | Unchecked | NA | No  | Complete | 97.3  |
| Unchecked | Unchecked | Unchecked | NA | No  | Complete | 98.2  |
| Unchecked | Checked   | Unchecked | NA | No  | Complete | 92.5  |

|           |           |           |    |     |          |       |
|-----------|-----------|-----------|----|-----|----------|-------|
| Unchecked | Unchecked | Unchecked | NA | No  | Complete | 101.6 |
| Unchecked | Unchecked | Unchecked | NA | No  | Complete | 103.4 |
| Unchecked | Checked   | Unchecked | NA | No  | Complete | 98.9  |
| Unchecked | Checked   | Unchecked | NA | No  | Complete | 100.5 |
| Unchecked | Unchecked | Unchecked | NA | Yes | Complete | 98    |
| Unchecked | Unchecked | Unchecked | NA | No  | Complete | 97.9  |
| Unchecked | Checked   | Unchecked | NA | No  | Complete | 97.9  |
| Unchecked | Unchecked | Unchecked | NA | No  | Complete | 99.1  |
| Checked   | Checked   | Unchecked | NA | No  | Complete | 102.9 |
| Unchecked | Unchecked | Unchecked | NA | No  | Complete | 98.7  |
| Unchecked | Unchecked | Unchecked | NA | No  | Complete | 99.5  |
| Unchecked | Checked   | Unchecked | NA | No  | Complete | 98.2  |
| Unchecked | Unchecked | Unchecked | NA | No  | Complete | 97.4  |
| Unchecked | Unchecked | Unchecked | NA | No  | Complete | 99.1  |
| Unchecked | Unchecked | Unchecked | NA | No  | Complete | 100.3 |
| Unchecked | Unchecked | Unchecked | NA | No  | Complete | 97.6  |
| Unchecked | Unchecked | Unchecked | NA | No  | Complete | 97.5  |
| Unchecked | Unchecked | Unchecked | NA | No  | Complete | 98.3  |
| Unchecked | Unchecked | Unchecked | NA | No  | Complete | 98    |
| Unchecked | Unchecked | Unchecked | NA | Yes | Complete | 98.4  |
| Unchecked | Unchecked | Unchecked | NA | No  | Complete | 100   |
| Unchecked | Checked   | Unchecked | NA | Yes | Complete | 100.7 |
| Unchecked | Unchecked | Unchecked | NA | Yes | Complete | 99.3  |
| Unchecked | Unchecked | Unchecked | NA | Yes | Complete | 97.7  |
| Unchecked | Checked   | Unchecked | NA | Yes | Complete | 99.4  |
| Unchecked | Checked   | Unchecked | NA | No  | Complete | 98.5  |
| Unchecked | Checked   | Unchecked | NA | No  | Complete | 100   |
| Unchecked | Checked   | Unchecked | NA | No  | Complete | 98.1  |
| Unchecked | Checked   | Unchecked | NA | NA  | Complete | 104.2 |
| Unchecked | Unchecked | Unchecked | NA | No  | Complete | 98.7  |
| Unchecked | Unchecked | Unchecked | NA | No  | Complete | 98.6  |
| Unchecked | Unchecked | Unchecked | NA | No  | Complete | 101.3 |
| Unchecked | Unchecked | Unchecked | NA | No  | Complete | 101.1 |
| Unchecked | Checked   | Unchecked | NA | No  | Complete | 98.2  |
| Unchecked | Unchecked | Unchecked | NA | No  | Complete | 98.1  |
| Checked   | Unchecked | Unchecked | NA | No  | Complete | 99.3  |
| Unchecked | Unchecked | Unchecked | NA | No  | Complete | 97.8  |
| Unchecked | Unchecked | Unchecked | NA | No  | Complete | 92.3  |
| Unchecked | Checked   | Unchecked | NA | UNK | Complete | 98.8  |
| Unchecked | Unchecked | Unchecked | NA | No  | Complete | 97.6  |
| Unchecked | Unchecked | Unchecked | NA | No  | Complete | 100.5 |
| Unchecked | Unchecked | Unchecked | NA | No  | Complete | 97.6  |
| Unchecked | Checked   | Unchecked | NA | UNK | Complete | 99.9  |
| Unchecked | Unchecked | Unchecked | NA | No  | Complete | 97    |
| Unchecked | Unchecked | Unchecked | NA | No  | Complete | 99.2  |

|           |           |           |               |     |          |       |
|-----------|-----------|-----------|---------------|-----|----------|-------|
| Unchecked | Unchecked | Unchecked | NA            | No  | Complete | 100.1 |
| Unchecked | Unchecked | Checked   | hypothyroid   | UNK | Complete | 103.1 |
| Unchecked | Unchecked | Checked   | hypothyroid   | UNK | Complete | 97.3  |
| Unchecked | Checked   | Checked   | hypothyroid   | No  | Complete | 97    |
| Unchecked | Unchecked | Unchecked | NA            | Yes | Complete | 99.3  |
| Unchecked | Checked   | Unchecked | NA            | Yes | Complete | 98.1  |
| Unchecked | Checked   | Unchecked | NA            | Yes | Complete | 98.8  |
| Checked   | Checked   | Unchecked | NA            | UNK | Complete | 98    |
| Unchecked | Unchecked | Unchecked | NA            | No  | Complete | 98.9  |
| Checked   | Unchecked | Unchecked | NA            | No  | Complete | 102.7 |
| Checked   | Checked   | Unchecked | NA            | Yes | Complete | 97.9  |
| Unchecked | Checked   | Unchecked | NA            | No  | Complete | 98.3  |
| Unchecked | Checked   | Unchecked | NA            | No  | Complete | 98.3  |
| Unchecked | Unchecked | Unchecked | NA            | No  | Complete | 98.5  |
| Unchecked | Unchecked | Unchecked | NA            | UNK | Complete | 99.2  |
| Checked   | Checked   | Unchecked | NA            | No  | Complete | 98.7  |
| Unchecked | Unchecked | Unchecked | NA            | No  | Complete | 101.3 |
| Unchecked | Checked   | Unchecked | NA            | No  | Complete | 102.9 |
| Unchecked | Unchecked | Unchecked | NA            | UNK | Complete | 100.3 |
| Unchecked | Unchecked | Checked   | hypothyroidis | No  | Complete | 97.9  |
| Unchecked | Checked   | Unchecked | NA            | Yes | Complete | 98.1  |
| Unchecked | Unchecked | Unchecked | NA            | Yes | Complete | 97.5  |
| Unchecked | Checked   | Unchecked | NA            | Yes | Complete | 98.5  |
| Unchecked | Checked   | Unchecked | NA            | Yes | Complete | 98    |
| Unchecked | Unchecked | Unchecked | NA            | No  | Complete | 98.2  |
| Checked   | Checked   | Unchecked | NA            | No  | Complete | 100.8 |
| Unchecked | Checked   | Unchecked | NA            | UNK | Complete | 101.8 |
| Unchecked | Unchecked | Unchecked | NA            | No  | Complete | 101.1 |
| Unchecked | Checked   | Unchecked | NA            | No  | Complete | 101.5 |
| Unchecked | Unchecked | Unchecked | NA            | Yes | Complete | 98.2  |
| Checked   | Unchecked | Unchecked | NA            | No  | Complete | 102.8 |
| Unchecked | Unchecked | Unchecked | NA            | No  | Complete | 98.4  |
| Unchecked | Unchecked | Unchecked | NA            | No  | Complete | 98.5  |
| Unchecked | Unchecked | Unchecked | NA            | Yes | Complete | 98    |
| Unchecked | Checked   | Unchecked | NA            | No  | Complete | 103.1 |
| Unchecked | Unchecked | Unchecked | NA            | UNK | Complete | 98.6  |
| Unchecked | Unchecked | Unchecked | NA            | No  | Complete | 98.7  |
| Unchecked | Unchecked | Unchecked | NA            | No  | Complete | 98.6  |
| Unchecked | Unchecked | Unchecked | NA            | No  | Complete | 99.2  |
| Unchecked | Unchecked | Unchecked | NA            | Yes | Complete | 99    |
| Unchecked | Unchecked | Unchecked | NA            | No  | Complete | 98.3  |
| Unchecked | Checked   | Unchecked | NA            | No  | Complete | 100.5 |
| Unchecked | Unchecked | Checked   | hypothyroidis | No  | Complete | 100.1 |
| Unchecked | Unchecked | Checked   | hypothyroidis | No  | Complete | 97.3  |
| Unchecked | Unchecked | Unchecked | NA            | Yes | Complete | 99.2  |

|           |           |           |              |     |          |       |
|-----------|-----------|-----------|--------------|-----|----------|-------|
| Unchecked | Checked   | Unchecked | NA           | No  | Complete | 98.5  |
| Checked   | Unchecked | Unchecked | NA           | No  | Complete | 101.7 |
| Unchecked | Unchecked | Checked   | hypothyroidi | Yes | Complete | 98.3  |
| Unchecked | Unchecked | Checked   | hypothyroidi | No  | Complete | 98.4  |
| Unchecked | Checked   | Unchecked | NA           | No  | Complete | 99.6  |
| Unchecked | Unchecked | Unchecked | NA           | UNK | Complete | 98.9  |
| Unchecked | Checked   | Checked   | hypothyroidi | No  | Complete | 98.9  |
| Unchecked | Checked   | Checked   | hypothyroidi | No  | Complete | 98.6  |
| Unchecked | Unchecked | Unchecked | NA           | Yes | Complete | 98.6  |
| Unchecked | Unchecked | Unchecked | NA           | No  | Complete | 99.2  |
| Unchecked | Checked   | Unchecked | NA           | Yes | Complete | 100.5 |
| Unchecked | Checked   | Unchecked | NA           | No  | Complete | 97.8  |
| Checked   | Checked   | Unchecked | NA           | Yes | Complete | 98.9  |
| Unchecked | Checked   | Unchecked | NA           | Yes | Complete | 98.6  |
| Unchecked | Unchecked | Unchecked | NA           | No  | Complete | 99.6  |
| Unchecked | Checked   | Unchecked | NA           | UNK | Complete | 97.7  |
| Unchecked | Checked   | Unchecked | NA           | No  | Complete | 97.6  |
| Unchecked | Unchecked | Unchecked | NA           | No  | Complete | 100.9 |
| Unchecked | Unchecked | Unchecked | NA           | No  | Complete | 99.4  |
| Unchecked | Checked   | Unchecked | NA           | No  | Complete | 98.7  |
| Unchecked | Checked   | Unchecked | NA           | No  | Complete | 99    |
| Checked   | Unchecked | Unchecked | NA           | No  | Complete | 99.7  |
| Unchecked | Unchecked | Unchecked | NA           | Yes | Complete | 97.6  |
| Unchecked | Unchecked | Unchecked | NA           | No  | Complete | 98.3  |
| Unchecked | Checked   | Unchecked | NA           | No  | Complete | 97.9  |
| Unchecked | Unchecked | Unchecked | NA           | No  | Complete | 97.8  |
| Checked   | Checked   | Unchecked | NA           | Yes | Complete | 101.6 |
| Unchecked | Unchecked | Checked   | hypothyroid  | Yes | Complete | 102.9 |
| Checked   | Checked   | Unchecked | NA           | UNK | Complete | 98.4  |
| Unchecked | Unchecked | Unchecked | NA           | UNK | Complete | 97.4  |
| Unchecked | Checked   | Unchecked | NA           | Yes | Complete | 97.9  |
| Checked   | Unchecked | Unchecked | NA           | No  | Complete | 97.7  |
| Checked   | Checked   | Checked   | hypothyroid  | No  | Complete | 100.1 |
| Checked   | Checked   | Checked   | hypothyroid  | No  | Complete | 99.2  |
| Unchecked | Unchecked | Unchecked | NA           | No  | Complete | 100   |
| Unchecked | Unchecked | Unchecked | NA           | No  | Complete | 99.3  |
| Unchecked | Unchecked | Unchecked | NA           | UNK | Complete | 100.4 |
| Unchecked | Unchecked | Unchecked | NA           | No  | Complete | 98.1  |
| Unchecked | Unchecked | Unchecked | NA           | No  | Complete | 100.8 |
| Unchecked | Checked   | Unchecked | NA           | UNK | Complete | 98.8  |
| Unchecked | Unchecked | Unchecked | NA           | No  | Complete | 98.5  |
| Unchecked | Unchecked | Unchecked | NA           | No  | Complete | 97.2  |
| Unchecked | Unchecked | Unchecked | NA           | No  | Complete | 99.9  |
| Unchecked | Unchecked | Unchecked | NA           | Yes | Complete | 98.8  |
| Unchecked | Unchecked | Unchecked | NA           | No  | Complete | 98.9  |

|           |           |           |    |     |          |       |
|-----------|-----------|-----------|----|-----|----------|-------|
| Unchecked | Unchecked | Unchecked | NA | No  | Complete | 99.5  |
| Unchecked | Unchecked | Unchecked | NA | No  | Complete | 100.1 |
| Unchecked | Unchecked | Unchecked | NA | No  | Complete | 98.5  |
| Unchecked | Unchecked | Unchecked | NA | UNK | Complete | 100.3 |
| Unchecked | Unchecked | Unchecked | NA | Yes | Complete | 97.4  |
| Unchecked | Unchecked | Unchecked | NA | No  | Complete | 99.3  |
| Unchecked | Unchecked | Unchecked | NA | No  | Complete | 98.1  |
| Unchecked | Unchecked | Unchecked | NA | Yes | Complete | 99.9  |
| Unchecked | Unchecked | Unchecked | NA | No  | Complete | 98.9  |
| Unchecked | Unchecked | Unchecked | NA | UNK | Complete | 98    |
| Unchecked | Checked   | Unchecked | NA | No  | Complete | 98.3  |
| Unchecked | Unchecked | Unchecked | NA | No  | Complete | 99    |
| Unchecked | Checked   | Unchecked | NA | UNK | Complete | 99    |
| Unchecked | Unchecked | Unchecked | NA | No  | Complete | 98.1  |
| Unchecked | Unchecked | Unchecked | NA | No  | Complete | 96.5  |
| Unchecked | Checked   | Unchecked | NA | No  | Complete | 98.5  |
| Unchecked | Unchecked | Unchecked | NA | UNK | Complete | 98    |
| Unchecked | Unchecked | Unchecked | NA | Yes | Complete | 99.4  |
| Unchecked | Checked   | Unchecked | NA | Yes | Complete | 99.9  |
| Unchecked | Checked   | Unchecked | NA | Yes | Complete | 98.9  |
| Unchecked | Unchecked | Unchecked | NA | No  | Complete | 99.3  |
| Unchecked | Checked   | Unchecked | NA | No  | Complete | 101.3 |
| Unchecked | Unchecked | Unchecked | NA | No  | Complete | 103.6 |
| Unchecked | Unchecked | Unchecked | NA | No  | Complete | 98.8  |
| Unchecked | Unchecked | Unchecked | NA | No  | Complete | 99.6  |
| Unchecked | Unchecked | Unchecked | NA | No  | Complete | 98.8  |
| Unchecked | Checked   | Unchecked | NA | UNK | Complete | 101.6 |
| Unchecked | Checked   | Unchecked | NA | UNK | Complete | 99.3  |
| Checked   | Checked   | Unchecked | NA | Yes | Complete | 98.8  |
| Unchecked | Unchecked | Unchecked | NA | Yes | Complete | 99.2  |
| Unchecked | Checked   | Unchecked | NA | UNK | Complete | 98.8  |
| Unchecked | Checked   | Unchecked | NA | Yes | Complete | 99.2  |
| Checked   | Checked   | Unchecked | NA | No  | Complete | 97.6  |
| Unchecked | Unchecked | Unchecked | NA | No  | Complete | 98.7  |
| Unchecked | Unchecked | Unchecked | NA | No  | Complete | 98.8  |
| Unchecked | Checked   | Unchecked | NA | No  | Complete | 99.8  |
| Unchecked | Unchecked | Unchecked | NA | No  | Complete | 103   |
| Checked   | Checked   | Unchecked | NA | No  | Complete | 101.5 |
| Unchecked | Unchecked | Unchecked | NA | No  | Complete | 99.2  |
| Unchecked | Unchecked | Unchecked | NA | No  | Complete | 98.3  |
| Unchecked | Unchecked | Unchecked | NA | UNK | Complete | 104.8 |
| Unchecked | Checked   | Unchecked | NA | Yes | Complete | 97.4  |
| Unchecked | Checked   | Unchecked | NA | No  | Complete | 97.5  |
| Unchecked | Unchecked | Unchecked | NA | No  | Complete | 98.3  |
| Unchecked | Unchecked | Unchecked | NA | No  | Complete | 102   |

|           |           |           |    |     |          |       |
|-----------|-----------|-----------|----|-----|----------|-------|
| Unchecked | Checked   | Unchecked | NA | Yes | Complete | 101   |
| Unchecked | Unchecked | Unchecked | NA | Yes | Complete | 99.4  |
| Unchecked | Unchecked | Unchecked | NA | UNK | Complete | 101.9 |
| Unchecked | Unchecked | Unchecked | NA | No  | Complete | 98.4  |
| Unchecked | Unchecked | Unchecked | NA | Yes | Complete | 98.3  |
| Unchecked | Unchecked | Unchecked | NA | Yes | Complete | 98.6  |
| Unchecked | Unchecked | Unchecked | NA | Yes | Complete | 98    |
| Unchecked | Unchecked | Unchecked | NA | Yes | Complete | 99.5  |
| Unchecked | Unchecked | Unchecked | NA | Yes | Complete | 98.4  |
| Unchecked | Checked   | Unchecked | NA | No  | Complete | 97.5  |
| Unchecked | Checked   | Unchecked | NA | No  | Complete | 97.7  |
| Checked   | Unchecked | Unchecked | NA | No  | Complete | 98.9  |
| Checked   | Unchecked | Unchecked | NA | No  | Complete | 99    |
| Unchecked | Unchecked | Unchecked | NA | No  | Complete | 98.4  |
| Unchecked | Checked   | Unchecked | NA | No  | Complete | 102   |
| Unchecked | Checked   | Unchecked | NA | Yes | Complete | 100.7 |
| Unchecked | Unchecked | Unchecked | NA | Yes | Complete | 98.5  |
| Unchecked | Unchecked | Unchecked | NA | Yes | Complete | 98.1  |
| Unchecked | Unchecked | Unchecked | NA | No  | Complete | 99.9  |
| Unchecked | Checked   | Unchecked | NA | No  | Complete | 100.1 |
| Unchecked | Unchecked | Unchecked | NA | No  | Complete | 98.8  |
| Unchecked | Checked   | Unchecked | NA | No  | Complete | 100.3 |
| Unchecked | Checked   | Unchecked | NA | No  | Complete | 101.2 |
| Unchecked | Checked   | Unchecked | NA | Yes | Complete | 98.3  |
| Unchecked | Unchecked | Unchecked | NA | No  | Complete | 102.4 |
| Unchecked | Unchecked | Unchecked | NA | No  | Complete | 100.7 |
| Unchecked | Unchecked | Unchecked | NA | Yes | Complete | 97.6  |
| Unchecked | Checked   | Unchecked | NA | No  | Complete | 102.7 |
| Unchecked | Unchecked | Unchecked | NA | No  | Complete | 97.5  |
| Unchecked | Unchecked | Unchecked | NA | Yes | Complete | 102.6 |
| Unchecked | Unchecked | Unchecked | NA | No  | Complete | 99.9  |
| Unchecked | Unchecked | Unchecked | NA | No  | Complete | 97.6  |
| Unchecked | Unchecked | Unchecked | NA | Yes | Complete | 103.4 |
| Unchecked | Unchecked | Unchecked | NA | No  | Complete | 99.9  |
| Unchecked | Unchecked | Unchecked | NA | No  | Complete | 97.7  |
| Unchecked | Unchecked | Unchecked | NA | No  | Complete | 100.5 |
| Unchecked | Unchecked | Unchecked | NA | No  | Complete | 98    |
| Unchecked | Unchecked | Unchecked | NA | Yes | Complete | 98.9  |
| Unchecked | Checked   | Unchecked | NA | No  | Complete | 100.1 |
| Unchecked | Unchecked | Unchecked | NA | UNK | Complete | 97.5  |
| Unchecked | Unchecked | Unchecked | NA | UNK | Complete | 101   |
| Unchecked | Unchecked | Unchecked | NA | No  | Complete | 99.4  |
| Unchecked | Unchecked | Unchecked | NA | No  | Complete | 97.8  |
| Unchecked | Unchecked | Unchecked | NA | UNK | Complete | 97.9  |
| Unchecked | Unchecked | Unchecked | NA | No  | Complete | 100.5 |



|           |           |           |    |     |          |       |
|-----------|-----------|-----------|----|-----|----------|-------|
| Unchecked | Unchecked | Unchecked | NA | UNK | Complete | 99    |
| Unchecked | Checked   | Unchecked | NA | No  | Complete | 101.5 |
| Unchecked | Checked   | Unchecked | NA | No  | Complete | 99.5  |
| Unchecked | Checked   | Unchecked | NA | No  | Complete | 98.3  |
| Unchecked | Checked   | Unchecked | NA | No  | Complete | 97.3  |
| Unchecked | Unchecked | Unchecked | NA | UNK | Complete | 100.3 |
| Unchecked | Unchecked | Unchecked | NA | No  | Complete | 97.6  |
| Unchecked | Unchecked | Unchecked | NA | No  | Complete | 97    |
| Unchecked | Checked   | Unchecked | NA | No  | Complete | 102.4 |
| Unchecked | Unchecked | Unchecked | NA | No  | Complete | 98.8  |
| Unchecked | Unchecked | Unchecked | NA | Yes | Complete | 98.2  |
| Unchecked | Unchecked | Unchecked | NA | No  | Complete | 100.4 |
| Unchecked | Unchecked | Unchecked | NA | No  | Complete | 98.9  |
| Unchecked | Unchecked | Unchecked | NA | UNK | Complete | 97.9  |
| Checked   | Unchecked | Unchecked | NA | Yes | Complete | 102.8 |
| Unchecked | Unchecked | Unchecked | NA | No  | Complete | 103.3 |
| Unchecked | Unchecked | Unchecked | NA | Yes | Complete | 99.7  |
| Checked   | Checked   | Unchecked | NA | No  | Complete | 98.8  |
| Checked   | Unchecked | Unchecked | NA | Yes | Complete | 102.5 |
| Unchecked | Checked   | Unchecked | NA | Yes | Complete | 99.2  |
| Unchecked | Unchecked | Unchecked | NA | Yes | Complete | 98.3  |
| Checked   | Checked   | Unchecked | NA | Yes | Complete | 97.9  |
| Checked   | Unchecked | Unchecked | NA | No  | Complete | 98.1  |
| Unchecked | Unchecked | Unchecked | NA | No  | Complete | 98.5  |
| Unchecked | Checked   | Unchecked | NA | Yes | Complete | 97.6  |
| Unchecked | Checked   | Unchecked | NA | Yes | Complete | 98.4  |
| Unchecked | Unchecked | Unchecked | NA | No  | Complete | 97.7  |
| Unchecked | Checked   | Unchecked | NA | No  | Complete | 100.8 |
| Unchecked | Unchecked | Unchecked | NA | No  | Complete | 101.8 |
| Unchecked | Checked   | Unchecked | NA | No  | Complete | 97.9  |
| Unchecked | Unchecked | Unchecked | NA | No  | Complete | 99.5  |
| Unchecked | Unchecked | Unchecked | NA | No  | Complete | 98.3  |
| Unchecked | Unchecked | Unchecked | NA | Yes | Complete | 99    |
| Unchecked | Unchecked | Unchecked | NA | No  | Complete | 98.8  |
| Unchecked | Unchecked | Unchecked | NA | Yes | Complete | 98.5  |
| Unchecked | Unchecked | Unchecked | NA | Yes | Complete | 98.9  |
| Unchecked | Unchecked | Unchecked | NA | No  | Complete | 98.7  |
| Unchecked | Unchecked | Unchecked | NA | No  | Complete | 97.8  |
| Unchecked | Checked   | Unchecked | NA | No  | Complete | 98.4  |
| Unchecked | Checked   | Unchecked | NA | No  | Complete | 97.6  |
| Unchecked | Unchecked | Unchecked | NA | No  | Complete | 103   |
| Unchecked | Unchecked | Unchecked | NA | No  | Complete | 97.9  |
| Unchecked | Unchecked | Unchecked | NA | Yes | Complete | 97.7  |
| Unchecked | Unchecked | Unchecked | NA | Yes | Complete | 98.2  |
| Unchecked | Unchecked | Unchecked | NA | No  | Complete | 98.9  |

|           |           |           |              |     |          |       |
|-----------|-----------|-----------|--------------|-----|----------|-------|
| Unchecked | Checked   | Unchecked | NA           | No  | Complete | 102.9 |
| Unchecked | Unchecked | Unchecked | NA           | No  | Complete | 102.5 |
| Unchecked | Unchecked | Unchecked | NA           | No  | Complete | 97.8  |
| Unchecked | Unchecked | Unchecked | NA           | No  | Complete | 98.2  |
| Unchecked | Unchecked | Unchecked | NA           | No  | Complete | 98.7  |
| Unchecked | Unchecked | Unchecked | NA           | No  | Complete | 97.9  |
| Unchecked | Unchecked | Unchecked | NA           | No  | Complete | 98.3  |
| Unchecked | Unchecked | Unchecked | NA           | No  | Complete | 100.1 |
| Unchecked | Unchecked | Unchecked | NA           | No  | Complete | 98.6  |
| Unchecked | Unchecked | Unchecked | NA           | Yes | Complete | 99.9  |
| Unchecked | Checked   | Unchecked | NA           | No  | Complete | 100   |
| Unchecked | Unchecked | Unchecked | NA           | UNK | Complete | 100.6 |
| Unchecked | Checked   | Unchecked | NA           | Yes | Complete | 99.5  |
| Unchecked | Unchecked | Unchecked | NA           | No  | Complete | 99.2  |
| Unchecked | Unchecked | Unchecked | NA           | Yes | Complete | 97.4  |
| Unchecked | Unchecked | Unchecked | NA           | No  | Complete | 99.2  |
| Unchecked | Unchecked | Unchecked | NA           | No  | Complete | 98.4  |
| Unchecked | Unchecked | Unchecked | NA           | Yes | Complete | 95.5  |
| Unchecked | Checked   | Unchecked | NA           | No  | Complete | 97.9  |
| Unchecked | Unchecked | Unchecked | NA           | No  | Complete | 100.7 |
| Unchecked | Unchecked | Unchecked | NA           | No  | Complete | 101.2 |
| Unchecked | Unchecked | Unchecked | NA           | No  | Complete | 103   |
| Unchecked | Unchecked | Unchecked | NA           | Yes | Complete | 99.2  |
| Unchecked | Unchecked | Unchecked | NA           | No  | Complete | 97.8  |
| Unchecked | Unchecked | Unchecked | NA           | Yes | Complete | 100.4 |
| Unchecked | Unchecked | Unchecked | NA           | No  | Complete | 98.2  |
| Unchecked | Unchecked | Checked   | Pre diabetes | Yes | Complete | 98    |
| Unchecked | Checked   | Unchecked | NA           | No  | Complete | 97.7  |
| Unchecked | Unchecked | Unchecked | NA           | Yes | Complete | 100.4 |
| Unchecked | Checked   | Unchecked | NA           | No  | Complete | 101.1 |
| Unchecked | Checked   | Unchecked | NA           | No  | Complete | 98.2  |
| Unchecked | Unchecked | Unchecked | NA           | Yes | Complete | 97.5  |
| Unchecked | Unchecked | Unchecked | NA           | No  | Complete | 98.5  |
| Unchecked | Unchecked | Unchecked | NA           | No  | Complete | 98.5  |
| Unchecked | Unchecked | Unchecked | NA           | No  | Complete | 102   |
| Unchecked | Checked   | Unchecked | NA           | No  | Complete | 101.1 |
| Unchecked | Unchecked | Unchecked | NA           | Yes | Complete | 101.6 |
| Unchecked | Unchecked | Unchecked | NA           | No  | Complete | 98.9  |
| Unchecked | Unchecked | Unchecked | NA           | No  | Complete | 99.8  |
| Unchecked | Unchecked | Unchecked | NA           | Yes | Complete | 99.6  |
| Unchecked | Unchecked | Unchecked | NA           | No  | Complete | 100   |
| Unchecked | Unchecked | Unchecked | NA           | No  | Complete | 102.3 |
| Unchecked | Unchecked | Unchecked | NA           | Yes | Complete | 98.1  |
| Unchecked | Unchecked | Unchecked | NA           | No  | Complete | 98.6  |
| Unchecked | Unchecked | Unchecked | NA           | No  | Complete | 98.2  |

|           |           |           |    |     |          |       |
|-----------|-----------|-----------|----|-----|----------|-------|
| Checked   | Unchecked | Unchecked | NA | No  | Complete | 102.4 |
| Unchecked | Checked   | Unchecked | NA | No  | Complete | 97.8  |
| Checked   | Unchecked | Unchecked | NA | Yes | Complete | 97.3  |
| Unchecked | Unchecked | Unchecked | NA | No  | Complete | 99.4  |
| Unchecked | Checked   | Unchecked | NA | No  | Complete | 100.2 |
| Unchecked | Unchecked | Unchecked | NA | No  | Complete | 102.8 |
| Checked   | Unchecked | Unchecked | NA | No  | Complete | 101.5 |
| Unchecked | Checked   | Unchecked | NA | No  | Complete | 97.9  |
| Unchecked | Unchecked | Unchecked | NA | No  | Complete | 102.4 |
| Unchecked | Unchecked | Unchecked | NA | No  | Complete | 100.5 |
| Unchecked | Checked   | Unchecked | NA | No  | Complete | 97.7  |
| Unchecked | Unchecked | Unchecked | NA | No  | Complete | 98.4  |
| Unchecked | Unchecked | Unchecked | NA | No  | Complete | 101.6 |
| Unchecked | Unchecked | Unchecked | NA | No  | Complete | 99.9  |
| Unchecked | Unchecked | Unchecked | NA | No  | Complete | 98.3  |
| Unchecked | Unchecked | Unchecked | NA | No  | Complete | 98.9  |
| Unchecked | Unchecked | Unchecked | NA | No  | Complete | 98.1  |
| Unchecked | Unchecked | Unchecked | NA | No  | Complete | 99.9  |
| Unchecked | Unchecked | Unchecked | NA | Yes | Complete | 98.3  |
| Unchecked | Unchecked | Unchecked | NA | No  | Complete | 102.9 |
| Unchecked | Unchecked | Unchecked | NA | Yes | Complete | 100.9 |
| Unchecked | Unchecked | Unchecked | NA | No  | Complete | 102.3 |
| Unchecked | Checked   | Unchecked | NA | No  | Complete | 99.2  |
| Unchecked | Unchecked | Unchecked | NA | No  | Complete | 99.1  |
| Unchecked | Unchecked | Unchecked | NA | No  | Complete | 100.2 |
| Unchecked | Checked   | Unchecked | NA | Yes | Complete | 100   |
| Unchecked | Checked   | Unchecked | NA | No  | Complete | 98.7  |
| Unchecked | Checked   | Unchecked | NA | Yes | Complete | 99.7  |
| Unchecked | Checked   | Unchecked | NA | No  | Complete | 98.2  |
| Unchecked | Checked   | Unchecked | NA | Yes | Complete | 100   |
| Unchecked | Checked   | Unchecked | NA | Yes | Complete | 98.4  |
| Unchecked | Unchecked | Unchecked | NA | No  | Complete | 98.7  |
| Unchecked | Unchecked | Unchecked | NA | No  | Complete | 100.4 |
| Unchecked | Checked   | Unchecked | NA | Yes | Complete | 97.1  |
| Unchecked | Checked   | Unchecked | NA | No  | Complete | 98.9  |
| Unchecked | Unchecked | Unchecked | NA | No  | Complete | 102.2 |
| Unchecked | Unchecked | Unchecked | NA | No  | Complete | 100   |
| Unchecked | Unchecked | Unchecked | NA | Yes | Complete | 99.5  |
| Unchecked | Unchecked | Unchecked | NA | No  | Complete | 98.8  |
| Checked   | Checked   | Unchecked | NA | No  | Complete | 99.6  |
| Unchecked | Unchecked | Unchecked | NA | No  | Complete | 99.1  |
| Unchecked | Checked   | Unchecked | NA | UNK | Complete | 98.5  |
| Unchecked | Unchecked | Unchecked | NA | No  | Complete | 98.4  |
| Unchecked | Unchecked | Unchecked | NA | No  | Complete | 97.8  |
| Unchecked | Unchecked | Unchecked | NA | No  | Complete | 99.6  |

|           |           |           |             |     |          |       |
|-----------|-----------|-----------|-------------|-----|----------|-------|
| Unchecked | Unchecked | Unchecked | NA          | No  | Complete | 100.6 |
| Unchecked | Unchecked | Checked   | Hypothyroid | Yes | Complete | 101.4 |
| Unchecked | Unchecked | Checked   | Hypothyroid | No  | Complete | 98.7  |
| Unchecked | Checked   | Checked   | Hypothyroid | Yes | Complete | 97.7  |
| Unchecked | Unchecked | Unchecked | NA          | UNK | Complete | 99.9  |
| Unchecked | Checked   | Unchecked | NA          | Yes | Complete | 103.4 |
| Unchecked | Checked   | Unchecked | NA          | No  | Complete | 101.7 |
| Unchecked | Checked   | Unchecked | NA          | No  | Complete | 97.2  |
| Unchecked | Unchecked | Unchecked | NA          | UNK | Complete | 101   |
| Unchecked | Unchecked | Unchecked | NA          | Yes | Complete | 98.3  |
| Unchecked | Unchecked | Unchecked | NA          | No  | Complete | 102.4 |
| Unchecked | Unchecked | Checked   | hypothyroid | No  | Complete | 99.4  |
| Unchecked | Unchecked | Unchecked | NA          | No  | Complete | 98.3  |
| Checked   | Unchecked | Checked   | hypothyroid | No  | Complete | 101.8 |
| Unchecked | Checked   | Unchecked | NA          | No  | Complete | 98.1  |
| Unchecked | Unchecked | Unchecked | NA          | No  | Complete | 97.7  |
| Unchecked | Unchecked | Checked   | hypothyroid | No  | Complete | 97.5  |
| Checked   | Unchecked | Unchecked | NA          | No  | Complete | 99.4  |
| Unchecked | Unchecked | Unchecked | NA          | Yes | Complete | 98.2  |
| Unchecked | Unchecked | Unchecked | NA          | Yes | Complete | 101.3 |
| Unchecked | Unchecked | Unchecked | NA          | No  | Complete | 98.6  |
| Unchecked | Checked   | Unchecked | NA          | UNK | Complete | 97.1  |
| Unchecked | Unchecked | Unchecked | NA          | No  | Complete | 100.6 |
| Checked   | Unchecked | Unchecked | NA          | No  | Complete | 98.3  |
| Unchecked | Checked   | Unchecked | NA          | No  | Complete | 97.9  |
| Unchecked | Unchecked | Unchecked | NA          | No  | Complete | 98.8  |
| Unchecked | Unchecked | Unchecked | NA          | No  | Complete | 101.6 |
| Checked   | Unchecked | Unchecked | NA          | Yes | Complete | 101.8 |
| Unchecked | Checked   | Unchecked | NA          | UNK | Complete | 102.8 |
| Unchecked | Unchecked | Unchecked | NA          | No  | Complete | 98.7  |
| Unchecked | Unchecked | Unchecked | NA          | Yes | Complete | 98.5  |
| Unchecked | Checked   | Unchecked | NA          | Yes | Complete | 100.6 |
| Unchecked | Unchecked | Unchecked | NA          | No  | Complete | 102   |
| Unchecked | Unchecked | Unchecked | NA          | No  | Complete | 100   |
| Unchecked | Unchecked | Unchecked | NA          | No  | Complete | 98.1  |
| Unchecked | Checked   | Unchecked | NA          | Yes | Complete | 99.5  |
| Unchecked | Unchecked | Unchecked | NA          | No  | Complete | 99.2  |
| Unchecked | Unchecked | Unchecked | NA          | No  | Complete | 100.8 |
| Checked   | Unchecked | Unchecked | NA          | No  | Complete | 99.8  |
| Unchecked | Unchecked | Unchecked | NA          | No  | Complete | 98.2  |
| Unchecked | Checked   | Unchecked | NA          | No  | Complete | 98.2  |
| Unchecked | Unchecked | Unchecked | NA          | UNK | Complete | 98.3  |
| Unchecked | Unchecked | Unchecked | NA          | No  | Complete | 98.9  |
| Unchecked | Checked   | Unchecked | NA          | No  | Complete | 98.5  |
| Unchecked | Checked   | Unchecked | NA          | No  | Complete | 98.6  |

|           |           |           |             |     |          |       |
|-----------|-----------|-----------|-------------|-----|----------|-------|
| Unchecked | Checked   | Unchecked | NA          | No  | Complete | 97.2  |
| Unchecked | Unchecked | Unchecked | NA          | No  | Complete | 100.6 |
| Unchecked | Checked   | Unchecked | NA          | No  | Complete | 97.7  |
| Unchecked | Unchecked | Unchecked | NA          | No  | Complete | 99.6  |
| Unchecked | Unchecked | Unchecked | NA          | No  | Complete | 99.7  |
| Unchecked | Unchecked | Unchecked | NA          | No  | Complete | 97    |
| Unchecked | Checked   | Unchecked | NA          | No  | Complete | 99.2  |
| Unchecked | Unchecked | Unchecked | NA          | UNK | Complete | 103.1 |
| Unchecked | Unchecked | Unchecked | NA          | Yes | Complete | 103.1 |
| Unchecked | Unchecked | Unchecked | NA          | No  | Complete | 98.4  |
| Unchecked | Checked   | Unchecked | NA          | No  | Complete | 99.7  |
| Checked   | Checked   | Unchecked | NA          | No  | Complete | 100.6 |
| Checked   | Checked   | Unchecked | NA          | No  | Complete | 99.7  |
| Checked   | Checked   | Unchecked | NA          | No  | Complete | 98.2  |
| Unchecked | Unchecked | Unchecked | NA          | No  | Complete | 101.7 |
| Unchecked | Unchecked | Unchecked | NA          | No  | Complete | 99.6  |
| Unchecked | Checked   | Unchecked | NA          | Yes | Complete | 97.9  |
| Unchecked | Checked   | Unchecked | NA          | Yes | Complete | 103.1 |
| Unchecked | Unchecked | Unchecked | NA          | UNK | Complete | 97.5  |
| Unchecked | Unchecked | Unchecked | NA          | No  | Complete | 97.5  |
| Unchecked | Unchecked | Unchecked | NA          | No  | Complete | 98.8  |
| Checked   | Checked   | Unchecked | NA          | No  | Complete | 98.2  |
| Unchecked | Unchecked | Unchecked | NA          | No  | Complete | 100.6 |
| Unchecked | Checked   | Unchecked | NA          | No  | Complete | 97.7  |
| Unchecked | Unchecked | Unchecked | NA          | No  | Complete | 97.9  |
| Unchecked | Unchecked | Unchecked | NA          | No  | Complete | 98.6  |
| Unchecked | Checked   | Unchecked | NA          | Yes | Complete | 99.2  |
| Unchecked | Unchecked | Unchecked | NA          | No  | Complete | 100.1 |
| Unchecked | Checked   | Unchecked | NA          | UNK | Complete | 98.1  |
| Checked   | Unchecked | Unchecked | NA          | No  | Complete | 99.7  |
| Unchecked | Checked   | Unchecked | NA          | Yes | Complete | 98.7  |
| Unchecked | Unchecked | Unchecked | NA          | Yes | Complete | 98.1  |
| Unchecked | Unchecked | Unchecked | NA          | No  | Complete | 98.3  |
| Unchecked | Unchecked | Unchecked | NA          | Yes | Complete | 98.2  |
| Unchecked | Unchecked | Unchecked | NA          | No  | Complete | 98.7  |
| Unchecked | Checked   | Unchecked | NA          | No  | Complete | 98    |
| Unchecked | Unchecked | Unchecked | NA          | No  | Complete | 99.9  |
| Unchecked | Unchecked | Checked   | hypothyroid | UNK | Complete | 98    |
| Unchecked | Unchecked | Unchecked | NA          | No  | Complete | 99.4  |
| Unchecked | Checked   | Unchecked | NA          | Yes | Complete | 99    |
| Unchecked | Checked   | Unchecked | NA          | Yes | Complete | 98.9  |
| Checked   | Unchecked | Unchecked | NA          | Yes | Complete | 99.1  |
| Checked   | Unchecked | Unchecked | NA          | No  | Complete | 99.2  |
| Unchecked | Unchecked | Unchecked | NA          | Yes | Complete | 97.8  |
| Unchecked | Unchecked | Unchecked | NA          | No  | Complete | 101.4 |

|           |           |           |              |     |          |       |
|-----------|-----------|-----------|--------------|-----|----------|-------|
| Unchecked | Unchecked | Unchecked | NA           | No  | Complete | 100.7 |
| Unchecked | Checked   | Unchecked | NA           | Yes | Complete | 98.1  |
| Unchecked | Unchecked | Unchecked | NA           | No  | Complete | 100   |
| Checked   | Unchecked | Unchecked | NA           | No  | Complete | 100.3 |
| Unchecked | Checked   | Unchecked | NA           | Yes | Complete | 99.6  |
| Unchecked | Checked   | Unchecked | NA           | Yes | Complete | 98.9  |
| Unchecked | Checked   | Unchecked | NA           | Yes | Complete | 98.5  |
| Unchecked | Checked   | Unchecked | NA           | No  | Complete | 98.3  |
| Unchecked | Unchecked | Unchecked | NA           | No  | Complete | 99    |
| Unchecked | Checked   | Unchecked | NA           | Yes | Complete | 98.7  |
| Unchecked | Unchecked | Unchecked | NA           | Yes | Complete | 97.9  |
| Checked   | Unchecked | Unchecked | NA           | Yes | Complete | 100.2 |
| Unchecked | Checked   | Unchecked | NA           | Yes | Complete | 99.3  |
| Unchecked | Unchecked | Unchecked | NA           | No  | Complete | 98.3  |
| Unchecked | Unchecked | Unchecked | NA           | No  | Complete | 99.6  |
| Unchecked | Unchecked | Unchecked | NA           | No  | Complete | 98.4  |
| Unchecked | Checked   | Unchecked | NA           | No  | Complete | 100.4 |
| Unchecked | Unchecked | Unchecked | NA           | No  | Complete | 98.7  |
| Unchecked | Unchecked | Unchecked | NA           | No  | Complete | 98    |
| Unchecked | Checked   | Unchecked | NA           | No  | Complete | 99.7  |
| Unchecked | Unchecked | Unchecked | NA           | No  | Complete | 98    |
| Unchecked | Unchecked | Unchecked | NA           | No  | Complete | 98.7  |
| Unchecked | Checked   | Unchecked | NA           | No  | Complete | 100.2 |
| Unchecked | Unchecked | Unchecked | NA           | No  | Complete | 100.5 |
| Unchecked | Unchecked | Unchecked | NA           | No  | Complete | 97.7  |
| Unchecked | Unchecked | Unchecked | NA           | No  | Complete | 98.4  |
| Unchecked | Unchecked | Checked   | hyperparathy | Yes | Complete | 97.7  |
| Unchecked | Checked   | Unchecked | NA           | No  | Complete | 97.8  |
| Unchecked | Unchecked | Unchecked | NA           | No  | Complete | 99.8  |
| Checked   | Unchecked | Unchecked | NA           | No  | Complete | 99    |
| Unchecked | Unchecked | Checked   | hypothyroid  | UNK | Complete | 97.4  |
| Unchecked | Unchecked | Unchecked | NA           | No  | Complete | 98.2  |
| Unchecked | Unchecked | Unchecked | NA           | Yes | Complete | 98.2  |
| Unchecked | Unchecked | Unchecked | NA           | No  | Complete | 97.8  |
| Unchecked | Unchecked | Unchecked | NA           | No  | Complete | 102.7 |
| Unchecked | Checked   | Unchecked | NA           | No  | Complete | 99.8  |
| Unchecked | Unchecked | Unchecked | NA           | No  | Complete | 98.3  |
| Unchecked | Checked   | Unchecked | NA           | No  | Complete | 100.5 |
| Unchecked | Unchecked | Unchecked | NA           | No  | Complete | 102   |
| Unchecked | Unchecked | Unchecked | NA           | No  | Complete | 99.3  |
| Unchecked | Unchecked | Checked   | hypothyroid  | Yes | Complete | 98.7  |
| Unchecked | Unchecked | Unchecked | NA           | No  | Complete | 99    |
| Unchecked | Unchecked | Unchecked | NA           | No  | Complete | 97.5  |
| Unchecked | Unchecked | Unchecked | NA           | No  | Complete | 101.4 |
| Checked   | Unchecked | Unchecked | NA           | No  | Complete | 100.8 |

|           |           |           |             |     |          |       |
|-----------|-----------|-----------|-------------|-----|----------|-------|
| Unchecked | Unchecked | Unchecked | NA          | No  | Complete | 102.9 |
| Unchecked | Unchecked | Unchecked | NA          | No  | Complete | 100.2 |
| Unchecked | Checked   | Unchecked | NA          | No  | Complete | 98.6  |
| Unchecked | Checked   | Unchecked | NA          | Yes | Complete | 100.9 |
| Unchecked | Unchecked | Unchecked | NA          | No  | Complete | 97.7  |
| Unchecked | Unchecked | Unchecked | NA          | Yes | Complete | 99.9  |
| Unchecked | Unchecked | Unchecked | NA          | No  | Complete | 99.6  |
| Checked   | Unchecked | Unchecked | NA          | Yes | Complete | 98.7  |
| Unchecked | Unchecked | Unchecked | NA          | No  | Complete | 92.7  |
| Unchecked | Checked   | Unchecked | NA          | Yes | Complete | 99    |
| Unchecked | Checked   | Unchecked | NA          | Yes | Complete | 99    |
| Unchecked | Unchecked | Unchecked | NA          | No  | Complete | 98    |
| Unchecked | Unchecked | Unchecked | NA          | No  | Complete | 101.2 |
| Checked   | Unchecked | Unchecked | NA          | No  | Complete | 98.9  |
| Unchecked | Unchecked | Unchecked | NA          | Yes | Complete | 102.3 |
| Unchecked | Unchecked | Unchecked | NA          | No  | Complete | 102.7 |
| Unchecked | Unchecked | Unchecked | NA          | No  | Complete | 100.7 |
| Unchecked | Unchecked | Unchecked | NA          | Yes | Complete | 99.4  |
| Unchecked | Unchecked | Unchecked | NA          | UNK | Complete | 98.6  |
| Unchecked | Unchecked | Unchecked | NA          | No  | Complete | 99.1  |
| Unchecked | Unchecked | Unchecked | NA          | No  | Complete | 98.9  |
| Unchecked | Unchecked | Unchecked | NA          | Yes | Complete | 97.9  |
| Unchecked | Unchecked | Unchecked | NA          | UNK | Complete | 98.8  |
| Unchecked | Checked   | Unchecked | NA          | No  | Complete | 97.3  |
| Unchecked | Unchecked | Unchecked | NA          | No  | Complete | 98.4  |
| Unchecked | Unchecked | Unchecked | NA          | Yes | Complete | 100.1 |
| Unchecked | Unchecked | Unchecked | NA          | No  | Complete | 97.8  |
| Unchecked | Unchecked | Unchecked | NA          | No  | Complete | 98.6  |
| Unchecked | Unchecked | Unchecked | NA          | No  | Complete | 98.9  |
| Unchecked | Unchecked | Unchecked | NA          | No  | Complete | 98.9  |
| Unchecked | Unchecked | Unchecked | NA          | No  | Complete | 98.3  |
| Unchecked | Checked   | Unchecked | NA          | UNK | Complete | 99.7  |
| Unchecked | Unchecked | Unchecked | NA          | Yes | Complete | 97.5  |
| Unchecked | Unchecked | Unchecked | NA          | No  | Complete | 98.2  |
| Unchecked | Unchecked | Unchecked | NA          | No  | Complete | 103   |
| Unchecked | Checked   | Unchecked | NA          | No  | Complete | 98.4  |
| Unchecked | Unchecked | Checked   | hypothyroid | No  | Complete | 98.6  |
| Unchecked | Unchecked | Unchecked | NA          | UNK | Complete | 99.4  |
| Checked   | Unchecked | Unchecked | NA          | No  | Complete | 98.8  |
| Checked   | Checked   | Unchecked | NA          | No  | Complete | 99.5  |
| Unchecked | Checked   | Unchecked | NA          | No  | Complete | 101.9 |
| Unchecked | Checked   | Checked   | hypothyroid | No  | Complete | 98.7  |
| Checked   | Checked   | Checked   | hypothyroid | No  | Complete | 98    |
| Unchecked | Unchecked | Unchecked | NA          | No  | Complete | 98.1  |
| Checked   | Checked   | Unchecked | NA          | No  | Complete | 98.7  |

|           |           |           |               |     |          |       |
|-----------|-----------|-----------|---------------|-----|----------|-------|
| Unchecked | Unchecked | Unchecked | NA            | No  | Complete | 99.2  |
| Unchecked | Checked   | Unchecked | NA            | No  | Complete | 98    |
| Unchecked | Checked   | Unchecked | NA            | No  | Complete | 98.5  |
| Unchecked | Checked   | Unchecked | NA            | No  | Complete | 100.9 |
| Unchecked | Unchecked | Checked   | hypothyroid   | No  | Complete | 97.6  |
| Unchecked | Checked   | Checked   | hypothyroid   | No  | Complete | 99.6  |
| Unchecked | Unchecked | Unchecked | NA            | Yes | Complete | 98    |
| Unchecked | Unchecked | Unchecked | NA            | No  | Complete | 98.8  |
| Unchecked | Unchecked | Unchecked | NA            | Yes | Complete | 98.2  |
| Unchecked | Checked   | Unchecked | NA            | No  | Complete | 98.6  |
| Unchecked | Unchecked | Unchecked | NA            | No  | Complete | 98.2  |
| Unchecked | Unchecked | Unchecked | NA            | No  | Complete | 99    |
| Unchecked | Unchecked | Unchecked | NA            | No  | Complete | 98.9  |
| Unchecked | Unchecked | Unchecked | NA            | No  | Complete | 103.2 |
| Unchecked | Unchecked | Unchecked | NA            | No  | Complete | 100.2 |
| Unchecked | Unchecked | Unchecked | NA            | No  | Complete | 97.8  |
| Unchecked | Checked   | Unchecked | NA            | No  | Complete | 97.9  |
| Unchecked | Unchecked | Unchecked | NA            | No  | Complete | 103.4 |
| Unchecked | Unchecked | Checked   | hypopituitari | No  | Complete | 97    |
| Unchecked | Unchecked | Unchecked | NA            | No  | Complete | 98.2  |
| Checked   | Checked   | Unchecked | NA            | Yes | Complete | 102.7 |
| Unchecked | Unchecked | Unchecked | NA            | Yes | Complete | 103.4 |
| Checked   | Unchecked | Unchecked | NA            | No  | Complete | 103.2 |
| Unchecked | Unchecked | Unchecked | NA            | No  | Complete | 98    |
| Unchecked | Unchecked | Unchecked | NA            | Yes | Complete | 102.5 |
| Unchecked | Unchecked | Unchecked | NA            | No  | Complete | 101   |
| Unchecked | Checked   | Unchecked | NA            | Yes | Complete | 99.3  |
| Unchecked | Unchecked | Unchecked | NA            | Yes | Complete | 104.2 |
| Unchecked | Checked   | Unchecked | NA            | Yes | Complete | 98.1  |
| Unchecked | Unchecked | Unchecked | NA            | No  | Complete | 99.8  |
| Unchecked | Unchecked | Unchecked | NA            | UNK | Complete | 100.5 |
| Unchecked | Checked   | Unchecked | NA            | Yes | Complete | 100.2 |
| Checked   | Checked   | Unchecked | NA            | Yes | Complete | 98.8  |
| Unchecked | Unchecked | Unchecked | NA            | No  | Complete | 101.8 |
| Unchecked | Unchecked | Unchecked | NA            | No  | Complete | 101.9 |
| Unchecked | Checked   | Unchecked | NA            | No  | Complete | 99.6  |
| Unchecked | Unchecked | Unchecked | NA            | No  | Complete | 100.2 |
| Unchecked | Unchecked | Unchecked | NA            | No  | Complete | 99    |
| Unchecked | Unchecked | Unchecked | NA            | No  | Complete | 101.3 |
| Checked   | Checked   | Unchecked | NA            | No  | Complete | 101.6 |
| Unchecked | Unchecked | Unchecked | NA            | No  | Complete | 97.6  |
| Unchecked | Checked   | Unchecked | NA            | UNK | Complete | 98.4  |
| Unchecked | Unchecked | Unchecked | NA            | No  | Complete | 101.9 |
| Unchecked | Checked   | Unchecked | NA            | No  | Complete | 97.4  |
| Unchecked | Unchecked | Unchecked | NA            | No  | Complete | 102.5 |



|           |           |           |    |     |          |       |
|-----------|-----------|-----------|----|-----|----------|-------|
| Unchecked | Checked   | Unchecked | NA | No  | Complete | 98.5  |
| Unchecked | Unchecked | Unchecked | NA | No  | Complete | 99.1  |
| Unchecked | Unchecked | Unchecked | NA | Yes | Complete | 98.2  |
| Unchecked | Unchecked | Unchecked | NA | No  | Complete | 99.4  |
| Unchecked | Unchecked | Unchecked | NA | Yes | Complete | 100.3 |
| Unchecked | Unchecked | Unchecked | NA | No  | Complete | 99.4  |
| Unchecked | Unchecked | Unchecked | NA | No  | Complete | 100.4 |
| Unchecked | Unchecked | Unchecked | NA | No  | Complete | 98.2  |
| Unchecked | Checked   | Unchecked | NA | No  | Complete | 100.4 |
| Unchecked | Checked   | Unchecked | NA | No  | Complete | 98.5  |
| Unchecked | Unchecked | Unchecked | NA | No  | Complete | 99.9  |
| Unchecked | Unchecked | Unchecked | NA | No  | Complete | 99.6  |
| Unchecked | Unchecked | Unchecked | NA | No  | Complete | 100.1 |
| Checked   | Checked   | Unchecked | NA | Yes | Complete | 98.5  |
| Unchecked | Checked   | Unchecked | NA | No  | Complete | 100.6 |
| Unchecked | Unchecked | Unchecked | NA | No  | Complete | 100.4 |
| Unchecked | Unchecked | Unchecked | NA | No  | Complete | 99.1  |
| Unchecked | Unchecked | Unchecked | NA | No  | Complete | 99.3  |
| Unchecked | Unchecked | Unchecked | NA | No  | Complete | 99.2  |
| Unchecked | Checked   | Unchecked | NA | No  | Complete | 101   |
| Unchecked | Checked   | Unchecked | NA | No  | Complete | 98.4  |
| Unchecked | Checked   | Unchecked | NA | No  | Complete | 102.5 |
| Unchecked | Unchecked | Unchecked | NA | No  | Complete | 99.1  |
| Checked   | Checked   | Unchecked | NA | No  | Complete | 93.6  |
| Unchecked | Checked   | Unchecked | NA | No  | Complete | 102.9 |
| Unchecked | Checked   | Unchecked | NA | No  | Complete | 103.5 |
| Unchecked | Checked   | Unchecked | NA | No  | Complete | 98.2  |
| Unchecked | Unchecked | Unchecked | NA | No  | Complete | 98.6  |
| Unchecked | Unchecked | Unchecked | NA | No  | Complete | 98.6  |
| Unchecked | Checked   | Unchecked | NA | Yes | Complete | 99.9  |
| Unchecked | Unchecked | Unchecked | NA | No  | Complete | 102   |
| Unchecked | Checked   | Unchecked | NA | Yes | Complete | 99.5  |
| Unchecked | Checked   | Unchecked | NA | No  | Complete | 98    |
| Unchecked | Unchecked | Unchecked | NA | No  | Complete | 100.7 |
| Unchecked | Unchecked | Unchecked | NA | No  | Complete | 99.7  |
| Unchecked | Unchecked | Unchecked | NA | No  | Complete | 102.9 |
| Unchecked | Checked   | Unchecked | NA | Yes | Complete | 98.7  |
| Unchecked | Unchecked | Unchecked | NA | No  | Complete | 98.4  |
| Unchecked | Checked   | Unchecked | NA | No  | Complete | 100.7 |
| Unchecked | Unchecked | Unchecked | NA | No  | Complete | 98.3  |
| Unchecked | Checked   | Unchecked | NA | Yes | Complete | 100.2 |
| Unchecked | Checked   | Unchecked | NA | No  | Complete | 98.2  |
| Unchecked | Checked   | Unchecked | NA | No  | Complete | 99.8  |
| Unchecked | Checked   | Unchecked | NA | No  | Complete | 98.1  |
| Unchecked | Unchecked | Unchecked | NA | No  | Complete | 100.9 |

|           |           |           |    |     |          |       |
|-----------|-----------|-----------|----|-----|----------|-------|
| Unchecked | Unchecked | Unchecked | NA | Yes | Complete | 99.5  |
| Unchecked | Unchecked | Unchecked | NA | No  | Complete | 98.6  |
| Unchecked | Unchecked | Unchecked | NA | Yes | Complete | 97.6  |
| Unchecked | Unchecked | Unchecked | NA | No  | Complete | 102.8 |
| Unchecked | Unchecked | Unchecked | NA | No  | Complete | 100.6 |
| Unchecked | Checked   | Unchecked | NA | No  | Complete | 98.2  |
| Unchecked | Unchecked | Unchecked | NA | No  | Complete | 97.6  |
| Unchecked | Checked   | Unchecked | NA | Yes | Complete | 98.5  |
| Unchecked | Unchecked | Unchecked | NA | No  | Complete | 99.1  |
| Unchecked | Unchecked | Unchecked | NA | No  | Complete | 100.4 |
| Checked   | Unchecked | Unchecked | NA | No  | Complete | 99.3  |
| Checked   | Unchecked | Unchecked | NA | No  | Complete | 100.3 |
| Unchecked | Unchecked | Unchecked | NA | No  | Complete | 97.7  |
| Unchecked | Checked   | Unchecked | NA | Yes | Complete | 98.2  |
| Unchecked | Unchecked | Unchecked | NA | No  | Complete | 100.1 |
| Unchecked | Unchecked | Unchecked | NA | Yes | Complete | 98.2  |
| Unchecked | Unchecked | Unchecked | NA | No  | Complete | 97.7  |
| Unchecked | Unchecked | Unchecked | NA | No  | Complete | 97.6  |
| Unchecked | Unchecked | Unchecked | NA | Yes | Complete | 98.4  |
| Unchecked | Unchecked | Unchecked | NA | No  | Complete | 98.2  |
| Unchecked | Unchecked | Unchecked | NA | Yes | Complete | 97.5  |
| Unchecked | Unchecked | Unchecked | NA | Yes | Complete | 98.7  |
| Unchecked | Unchecked | Unchecked | NA | Yes | Complete | 97.8  |
| Unchecked | Checked   | Unchecked | NA | No  | Complete | 92.7  |
| Unchecked | Checked   | Unchecked | NA | No  | Complete | 98.3  |
| Unchecked | Unchecked | Unchecked | NA | No  | Complete | 101   |
| Checked   | Unchecked | Unchecked | NA | No  | Complete | 97.8  |
| Unchecked | Checked   | Unchecked | NA | No  | Complete | 99.8  |
| Unchecked | Unchecked | Unchecked | NA | Yes | Complete | 98.2  |
| Unchecked | Checked   | Unchecked | NA | Yes | Complete | 99.9  |
| Unchecked | Checked   | Unchecked | NA | Yes | Complete | 98.2  |
| Unchecked | Unchecked | Unchecked | NA | No  | Complete | 102   |
| Unchecked | Checked   | Unchecked | NA | No  | Complete | 97.9  |
| Unchecked | Checked   | Unchecked | NA | Yes | Complete | 98.7  |
| Unchecked | Checked   | Unchecked | NA | No  | Complete | 98.1  |
| Unchecked | Unchecked | Unchecked | NA | No  | Complete | 97.7  |
| Unchecked | Checked   | Unchecked | NA | No  | Complete | 103.1 |
| Unchecked | Unchecked | Unchecked | NA | No  | Complete | 101.3 |
| Unchecked | Checked   | Unchecked | NA | No  | Complete | 97.6  |
| Checked   | Unchecked | Unchecked | NA | No  | Complete | 101.7 |
| Checked   | Checked   | Unchecked | NA | No  | Complete | 100   |
| Unchecked | Unchecked | Unchecked | NA | No  | Complete | 103.3 |
| Unchecked | Unchecked | Unchecked | NA | No  | Complete | 99.2  |
| Unchecked | Unchecked | Unchecked | NA | No  | Complete | 98.6  |
| Unchecked | Checked   | Unchecked | NA | No  | Complete | 98.1  |

|           |           |           |               |     |          |       |
|-----------|-----------|-----------|---------------|-----|----------|-------|
| Checked   | Unchecked | Unchecked | NA            | Yes | Complete | 103.5 |
| Unchecked | Checked   | Unchecked | NA            | No  | Complete | 97.4  |
| Unchecked | Checked   | Unchecked | NA            | No  | Complete | 98.3  |
| Checked   | Unchecked | Unchecked | NA            | No  | Complete | 101.7 |
| Unchecked | Unchecked | Unchecked | NA            | Yes | Complete | 98.8  |
| Checked   | Unchecked | Unchecked | NA            | Yes | Complete | 97.9  |
| Checked   | Unchecked | Unchecked | NA            | No  | Complete | 100.2 |
| Unchecked | Unchecked | Unchecked | NA            | No  | Complete | 97.8  |
| Unchecked | Unchecked | Checked   | GERD          | No  | Complete | 96    |
| Unchecked | Checked   | Unchecked | NA            | Yes | Complete | 98.3  |
| Unchecked | Checked   | Checked   | hyperlipidem  | Yes | Complete | 100.1 |
| Unchecked | Unchecked | Unchecked | NA            | Yes | Complete | 98.2  |
| Unchecked | Unchecked | Unchecked | NA            | Yes | Complete | 97.8  |
| Unchecked | Unchecked | Unchecked | NA            | No  | Complete | 102.1 |
| Unchecked | Checked   | Unchecked | NA            | No  | Complete | 98.4  |
| Unchecked | Unchecked | Unchecked | NA            | UNK | Complete | 98    |
| Checked   | Unchecked | Unchecked | NA            | UNK | Complete | 98.8  |
| Unchecked | Unchecked | Unchecked | NA            | Yes | Complete | 98.7  |
| Unchecked | Checked   | Unchecked | NA            | UNK | Complete | 98    |
| Unchecked | Unchecked | Checked   | hypothyroidis | No  | Complete | 99.2  |
| Unchecked | Unchecked | Unchecked | NA            | No  | Complete | 101.9 |
| Unchecked | Unchecked | Unchecked | NA            | No  | Complete | 99.4  |
| Checked   | Unchecked | Unchecked | NA            | UNK | Complete | 99    |
| Unchecked | Checked   | Unchecked | NA            | No  | Complete | 98.3  |
| Unchecked | Checked   | Unchecked | NA            | No  | Complete | 99.3  |
| Unchecked | Unchecked | Unchecked | NA            | No  | Complete | 99.4  |
| Unchecked | Unchecked | Unchecked | NA            | No  | Complete | 98.2  |
| Unchecked | Unchecked | Unchecked | NA            | UNK | Complete | 97.5  |
| Checked   | Checked   | Unchecked | NA            | No  | Complete | 100.4 |
| Unchecked | Unchecked | Unchecked | NA            | No  | Complete | 100.5 |
| Unchecked | Unchecked | Unchecked | NA            | No  | Complete | 97.8  |
| Unchecked | Checked   | Unchecked | NA            | No  | Complete | 104   |
| Unchecked | Unchecked | Checked   | hypothyroidis | No  | Complete | 97.5  |
| Unchecked | Unchecked | Unchecked | NA            | No  | Complete | 98.4  |
| Unchecked | Unchecked | Checked   | hypothyroidis | No  | Complete | 95.6  |
| Unchecked | Unchecked | Unchecked | NA            | No  | Complete | 100.9 |
| Unchecked | Unchecked | Checked   | hypothyroidis | No  | Complete | 99.8  |
| Unchecked | Unchecked | Checked   | metabolic er  | No  | Complete | 98.7  |
| Checked   | Checked   | Unchecked | NA            | No  | Complete | 100.5 |
| Unchecked | Checked   | Unchecked | NA            | Yes | Complete | 102.5 |
| Unchecked | Unchecked | Unchecked | NA            | No  | Complete | 97.7  |
| Unchecked | Unchecked | Checked   | prediabetes   | No  | Complete | 102.6 |
| Unchecked | Unchecked | Unchecked | NA            | Yes | Complete | 98.2  |
| Unchecked | Unchecked | Unchecked | NA            | Yes | Complete | 99.1  |
| Unchecked | Unchecked | Unchecked | NA            | No  | Complete | 101.1 |

|           |           |           |               |     |          |       |
|-----------|-----------|-----------|---------------|-----|----------|-------|
| Unchecked | Checked   | Unchecked | NA            | No  | Complete | 98.4  |
| Unchecked | Checked   | Unchecked | NA            | No  | Complete | 98.1  |
| Unchecked | Unchecked | Unchecked | NA            | No  | Complete | 97.6  |
| Unchecked | Unchecked | Unchecked | NA            | Yes | Complete | 101.5 |
| Unchecked | Unchecked | Checked   | hypothyroidis | No  | Complete | 99.2  |
| Unchecked | Unchecked | Unchecked | NA            | No  | Complete | 98.7  |
| Unchecked | Unchecked | Unchecked | NA            | Yes | Complete | 97.4  |
| Unchecked | Checked   | Unchecked | NA            | UNK | Complete | 97    |
| Unchecked | Unchecked | Unchecked | NA            | Yes | Complete | 98.4  |
| Unchecked | Unchecked | Unchecked | NA            | UNK | Complete | 97.5  |
| Unchecked | Unchecked | Unchecked | NA            | No  | Complete | 97.5  |
| Unchecked | Unchecked | Unchecked | NA            | No  | Complete | 100   |
| Unchecked | Checked   | Unchecked | NA            | No  | Complete | 98.8  |
| Unchecked | Unchecked | Unchecked | NA            | No  | Complete | 99    |
| Unchecked | Unchecked | Checked   | hypothyroidis | No  | Complete | 97.6  |
| Checked   | Checked   | Unchecked | NA            | No  | Complete | 103   |
| Unchecked | Unchecked | Unchecked | NA            | No  | Complete | 99.5  |
| Unchecked | Unchecked | Unchecked | NA            | No  | Complete | 101   |
| Unchecked | Checked   | Unchecked | NA            | Yes | Complete | 98.7  |
| Unchecked | Unchecked | Unchecked | NA            | No  | Complete | 98.6  |
| Unchecked | Unchecked | Unchecked | NA            | Yes | Complete | 98.5  |
| Unchecked | Unchecked | Unchecked | NA            | No  | Complete | 100.1 |
| Unchecked | Unchecked | Unchecked | NA            | No  | Complete | 99.9  |
| Unchecked | Unchecked | Unchecked | NA            | No  | Complete | 100.5 |
| Unchecked | Checked   | Unchecked | NA            | UNK | Complete | 97.7  |
| Unchecked | Checked   | Unchecked | NA            | Yes | Complete | 102.9 |
| Checked   | Checked   | Unchecked | NA            | No  | Complete | 104   |
| Unchecked | Unchecked | Unchecked | NA            | No  | Complete | 98.5  |
| Unchecked | Unchecked | Checked   | thyroid dz    | Yes | Complete | 99    |
| Unchecked | Unchecked | Unchecked | NA            | No  | Complete | 97.5  |
| Checked   | Checked   | Unchecked | NA            | No  | Complete | 103.2 |
| Unchecked | Unchecked | Unchecked | NA            | No  | Complete | 97.9  |
| Unchecked | Unchecked | Unchecked | NA            | No  | Complete | 98    |
| Unchecked | Checked   | Unchecked | NA            | No  | Complete | 101.2 |
| Unchecked | Unchecked | Unchecked | NA            | Yes | Complete | 97.8  |
| Unchecked | Unchecked | Unchecked | NA            | Yes | Complete | 99.8  |
| Unchecked | Unchecked | Unchecked | NA            | No  | Complete | 99.1  |
| Unchecked | Unchecked | Unchecked | NA            | No  | Complete | 98.9  |
| Unchecked | Unchecked | Unchecked | NA            | Yes | Complete | 98    |
| Unchecked | Checked   | Unchecked | NA            | Yes | Complete | 98.4  |
| Unchecked | Unchecked | Unchecked | NA            | No  | Complete | 100.8 |
| Unchecked | Unchecked | Unchecked | NA            | No  | Complete | 99.2  |
| Unchecked | Unchecked | Unchecked | NA            | Yes | Complete | 98.6  |
| Unchecked | Checked   | Checked   | hypothyroidis | No  | Complete | 98.1  |
| Unchecked | Unchecked | Unchecked | NA            | No  | Complete | 98.9  |

|           |           |           |               |     |          |       |
|-----------|-----------|-----------|---------------|-----|----------|-------|
| Unchecked | Unchecked | Unchecked | NA            | No  | Complete | 101.2 |
| Unchecked | Unchecked | Unchecked | NA            | No  | Complete | 98.8  |
| Unchecked | Unchecked | Unchecked | NA            | Yes | Complete | 98.3  |
| Unchecked | Unchecked | Checked   | hypothyroidis | No  | Complete | 100   |
| Unchecked | Checked   | Unchecked | NA            | UNK | Complete | 97.4  |
| Unchecked | Unchecked | Unchecked | NA            | Yes | Complete | 100.3 |
| Unchecked | Unchecked | Unchecked | NA            | Yes | Complete | 98.8  |
| Unchecked | Unchecked | Unchecked | NA            | No  | Complete | 97.2  |
| Unchecked | Unchecked | Unchecked | NA            | No  | Complete | 98.7  |
| Unchecked | Checked   | Unchecked | NA            | No  | Complete | 99.8  |
| Unchecked | Unchecked | Unchecked | NA            | No  | Complete | 98.9  |
| Unchecked | Unchecked | Unchecked | NA            | No  | Complete | 100.6 |
| Unchecked | Unchecked | Unchecked | NA            | No  | Complete | 98.9  |
| Unchecked | Checked   | Unchecked | NA            | No  | Complete | 99.4  |
| Unchecked | Checked   | Unchecked | NA            | No  | Complete | 98    |
| Unchecked | Unchecked | Unchecked | NA            | No  | Complete | 104.3 |
| Unchecked | Checked   | Unchecked | NA            | Yes | Complete | 97.3  |
| Unchecked | Checked   | Unchecked | NA            | Yes | Complete | 99.6  |
| Unchecked | Unchecked | Unchecked | NA            | No  | Complete | 98.3  |
| Unchecked | Unchecked | Checked   | hypothyroidis | No  | Complete | 97.7  |
| Unchecked | Checked   | Unchecked | NA            | UNK | Complete | 97.5  |
| Unchecked | Unchecked | Checked   | hypothyroidis | Yes | Complete | 100.8 |
| Unchecked | Checked   | Unchecked | NA            | No  | Complete | 98.6  |
| Unchecked | Unchecked | Unchecked | NA            | No  | Complete | 99.1  |
| Unchecked | Unchecked | Unchecked | NA            | No  | Complete | 102.6 |
| Unchecked | Unchecked | Unchecked | NA            | Yes | Complete | 98.2  |
| Unchecked | Checked   | Unchecked | NA            | No  | Complete | 102.1 |
| Unchecked | Checked   | Unchecked | NA            | Yes | Complete | 100.9 |
| Unchecked | Unchecked | Unchecked | NA            | Yes | Complete | 100.9 |
| Unchecked | Unchecked | Unchecked | NA            | Yes | Complete | 99.5  |
| Checked   | Unchecked | Unchecked | NA            | No  | Complete | 100.2 |
| Unchecked | Checked   | Unchecked | NA            | No  | Complete | 99.5  |
| Unchecked | Checked   | Unchecked | NA            | Yes | Complete | 98.3  |
| Unchecked | Unchecked | Unchecked | NA            | Yes | Complete | 98.1  |
| Checked   | Unchecked | Unchecked | NA            | No  | Complete | 98.5  |
| Unchecked | Unchecked | Unchecked | NA            | No  | Complete | 97.6  |
| Unchecked | Unchecked | Unchecked | NA            | Yes | Complete | 98.9  |
| Unchecked | Unchecked | Unchecked | NA            | Yes | Complete | 98.2  |
| Unchecked | Unchecked | Unchecked | NA            | No  | Complete | 97.8  |
| Unchecked | Unchecked | Unchecked | NA            | No  | Complete | 102   |
| Unchecked | Checked   | Unchecked | NA            | No  | Complete | 98.7  |
| Unchecked | Checked   | Unchecked | NA            | Yes | Complete | 97.6  |
| Unchecked | Checked   | Unchecked | NA            | Yes | Complete | 97.3  |
| Unchecked | Checked   | Unchecked | NA            | No  | Complete | 97.8  |
| Unchecked | Unchecked | Unchecked | NA            | Yes | Complete | 103.1 |

|           |           |           |    |     |          |       |
|-----------|-----------|-----------|----|-----|----------|-------|
| Unchecked | Unchecked | Unchecked | NA | UNK | Complete | 98.4  |
| Unchecked | Unchecked | Unchecked | NA | UNK | Complete | 99.6  |
| Unchecked | Checked   | Unchecked | NA | Yes | Complete | 98.9  |
| Unchecked | Unchecked | Unchecked | NA | No  | Complete | 97.8  |
| Unchecked | Checked   | Unchecked | NA | Yes | Complete | 98.3  |
| Unchecked | Unchecked | Unchecked | NA | No  | Complete | 99.5  |
| Unchecked | Unchecked | Unchecked | NA | No  | Complete | 99.7  |
| Checked   | Checked   | Unchecked | NA | UNK | Complete | 100.5 |
| Unchecked | Unchecked | Unchecked | NA | No  | Complete | 99.9  |
| Unchecked | Checked   | Unchecked | NA | Yes | Complete | 97.8  |
| Unchecked | Unchecked | Unchecked | NA | UNK | Complete | 98.6  |
| Unchecked | Checked   | Unchecked | NA | Yes | Complete | 99.1  |
| Unchecked | Unchecked | Unchecked | NA | UNK | Complete | 98.4  |
| Unchecked | Checked   | Unchecked | NA | No  | Complete | 99.7  |
| Unchecked | Checked   | Unchecked | NA | Yes | Complete | 97.4  |
| Checked   | Checked   | Unchecked | NA | No  | Complete | 100   |
| Checked   | Checked   | Unchecked | NA | No  | Complete | 98.8  |
| Unchecked | Checked   | Unchecked | NA | Yes | Complete | 98.5  |
| Checked   | Checked   | Unchecked | NA | Yes | Complete | 98.6  |
| Checked   | Checked   | Unchecked | NA | Yes | Complete | 97.9  |
| Unchecked | Checked   | Unchecked | NA | Yes | Complete | 98.3  |
| Unchecked | Checked   | Unchecked | NA | Yes | Complete | 97.7  |
| Unchecked | Checked   | Unchecked | NA | Yes | Complete | 97.9  |
| Unchecked | Checked   | Unchecked | NA | No  | Complete | 98.8  |
| Unchecked | Unchecked | Unchecked | NA | No  | Complete | 99.4  |
| Unchecked | Unchecked | Unchecked | NA | No  | Complete | 102.8 |
| Unchecked | Unchecked | Unchecked | NA | Yes | Complete | 99.9  |
| Unchecked | Unchecked | Unchecked | NA | No  | Complete | 100.5 |
| Unchecked | Unchecked | Unchecked | NA | Yes | Complete | 99.9  |
| Checked   | Checked   | Unchecked | NA | No  | Complete | 98.1  |
| Unchecked | Checked   | Unchecked | NA | No  | Complete | 98.2  |
| Unchecked | Checked   | Unchecked | NA | Yes | Complete | 98.7  |
| Unchecked | Unchecked | Unchecked | NA | UNK | Complete | 98.3  |
| Unchecked | Unchecked | Unchecked | NA | No  | Complete | 98.4  |
| Unchecked | Checked   | Unchecked | NA | No  | Complete | 97.6  |
| Unchecked | Unchecked | Unchecked | NA | No  | Complete | 99    |
| Unchecked | Checked   | Unchecked | NA | Yes | Complete | 98.4  |
| Unchecked | Unchecked | Unchecked | NA | UNK | Complete | 99.7  |
| Unchecked | Unchecked | Unchecked | NA | No  | Complete | 98.7  |
| Unchecked | Unchecked | Unchecked | NA | UNK | Complete | 102.5 |
| Unchecked | Unchecked | Unchecked | NA | No  | Complete | 98.2  |
| Unchecked | Unchecked | Unchecked | NA | UNK | Complete | 97.6  |
| Unchecked | Checked   | Unchecked | NA | No  | Complete | 98.2  |
| Unchecked | Unchecked | Unchecked | NA | No  | Complete | 97.6  |
| Unchecked | Unchecked | Unchecked | NA | No  | Complete | 98.1  |

|           |           |           |               |     |          |       |
|-----------|-----------|-----------|---------------|-----|----------|-------|
| Unchecked | Unchecked | Unchecked | NA            | No  | Complete | 99.6  |
| Unchecked | Unchecked | Checked   | hypothyroidis | UNK | Complete | 100.9 |
| Unchecked | Unchecked | Checked   | hypothyroidis | No  | Complete | 98.3  |
| Checked   | Checked   | Unchecked | NA            | No  | Complete | 98.4  |
| Unchecked | Unchecked | Unchecked | NA            | No  | Complete | 98.6  |
| Unchecked | Unchecked | Unchecked | NA            | No  | Complete | 103.1 |
| Unchecked | Checked   | Unchecked | NA            | No  | Complete | 98.4  |

|   |     |   |    |   |      |   |
|---|-----|---|----|---|------|---|
| 0 | 106 | 1 | 26 | 1 | 6.6  | 0 |
| 0 | 90  | 1 | 20 | 1 | 6.6  | 0 |
| 0 | 123 | 1 | 18 | 0 | 4.6  | 0 |
| 0 | 93  | 1 | 17 | 0 | 13.9 | 1 |
| 1 | 81  | 0 | 28 | 1 | 7.7  | 0 |
| 0 | 86  | 0 | 18 | 0 | 7.8  | 0 |
| 0 | 96  | 1 | 20 | 1 | 4.4  | 0 |
| 0 | 74  | 0 | 18 | 0 | 3.5  | 1 |
| 1 | 131 | 1 | 28 | 1 | 11.3 | 0 |
| 0 | 119 | 1 | 26 | 1 | 3.8  | 1 |
| 1 | 105 | 1 | 20 | 1 | 7.8  | 0 |
| 0 | 95  | 1 | 26 | 1 | 9    | 0 |
| 0 | 122 | 1 | 25 | 1 | 7.1  | 0 |
| 1 | 105 | 1 | 20 | 1 | 8.8  | 0 |
| 0 | 101 | 1 | 20 | 1 | 5.2  | 0 |
| 0 | 91  | 1 | 18 | 0 | 5.1  | 0 |
| 1 | 109 | 1 | 18 | 0 | 5    | 0 |
| 0 | 132 | 1 | 20 | 1 | 7.5  | 0 |
| 1 | 100 | 1 | 20 | 1 | 5.2  | 0 |
| 0 | 78  | 0 | 40 | 1 | 19.7 | 1 |
| 0 | 71  | 0 | 22 | 1 | 4.9  | 0 |
| 0 | 84  | 0 | 24 | 1 | 6.4  | 0 |
| 0 | 100 | 1 | 22 | 1 | 8.4  | 0 |
| 0 | 76  | 0 | 18 | 0 | 5.7  | 0 |
| 0 | 118 | 1 | 18 | 0 | 9.9  | 0 |
| 0 | 93  | 1 | 22 | 1 | 7.1  | 0 |
| 1 | 125 | 1 | 30 | 1 | 15.7 | 1 |
| 0 | 92  | 1 | 26 | 1 | 7.4  | 0 |
| 0 | 67  | 0 | 28 | 1 | 2.8  | 1 |
| 0 | 69  | 0 | 16 | 0 | 12.9 | 1 |
| 1 | 103 | 1 | 28 | 1 | 10.2 | 0 |
| 0 | 74  | 0 | 20 | 1 | 8.6  | 0 |
| 1 | 99  | 1 | 30 | 1 | 10.2 | 0 |
| 0 | 99  | 1 | 20 | 1 | 6    | 0 |
| 0 | 102 | 1 | 18 | 0 | 8.1  | 0 |
| 0 | 127 | 1 | 22 | 1 | 20   | 1 |
| 0 | 99  | 1 | 24 | 1 | 7.8  | 0 |
| 0 | 97  | 1 | 20 | 1 | 5.8  | 0 |
| 1 | 107 | 1 | 22 | 1 | 7    | 0 |
| 0 | 57  | 0 | 28 | 1 | 6.1  | 0 |
| 0 | 85  | 0 | 22 | 1 | 4.7  | 0 |
| 0 | 98  | 1 | 16 | 0 | 10.9 | 0 |
| 1 | 88  | 0 | 18 | 0 | 5.2  | 0 |
| 0 | 94  | 1 | 22 | 1 | 3.5  | 1 |
| 0 | 90  | 1 | 26 | 1 | 4.8  | 0 |



|   |     |   |    |   |      |   |
|---|-----|---|----|---|------|---|
| 0 | 71  | 0 | 18 | 0 | 5.2  | 0 |
| 0 | 98  | 1 | 20 | 1 | 14.7 | 1 |
| 0 | 67  | 0 | 20 | 1 | 3.1  | 1 |
| 1 | 137 | 1 | 22 | 1 | 19.3 | 1 |
| 1 | 91  | 1 | 26 | 1 | 9.6  | 0 |
| 0 | 84  | 0 | 20 | 1 | 5.2  | 0 |
| 0 | 97  | 1 | 20 | 1 | 10.5 | 0 |
| 0 | 94  | 1 | 22 | 1 | 7    | 0 |
| 0 | 83  | 0 | 25 | 1 | 9.2  | 0 |
| 0 | 102 | 1 | 26 | 1 | 6.2  | 0 |
| 1 | 89  | 0 | 28 | 1 | 6.3  | 0 |
| 0 | 143 | 1 | 22 | 1 | 14.2 | 1 |
| 0 | 90  | 1 | 20 | 1 | 10.1 | 0 |
| 0 | 82  | 0 | 18 | 0 | 0    | 1 |
| 1 | 83  | 0 | 20 | 1 | 8.2  | 0 |
| 0 | 94  | 1 | 18 | 0 | 7.3  | 0 |
| 0 | 82  | 0 | 18 | 0 | 5.8  | 0 |
| 0 | 67  | 0 | 20 | 1 | 8.2  | 0 |
| 0 | 97  | 1 | 16 | 0 | 15.8 | 1 |
| 0 | 74  | 0 | 24 | 1 | 5.3  | 0 |
| 0 | 108 | 1 | 22 | 1 | 8.6  | 0 |
| 0 | 97  | 1 | 38 | 1 | 4.1  | 0 |
| 0 | 67  | 0 | 32 | 1 | 11.8 | 0 |
| 1 | 112 | 1 | 18 | 0 | 9.6  | 0 |
| 0 | 91  | 1 | 34 | 1 | 10.3 | 0 |
| 0 | 89  | 0 | 18 | 0 | 5    | 0 |
| 0 | 68  | 0 | 18 | 0 | 2.9  | 1 |
| 0 | 100 | 1 | 22 | 1 | 19.3 | 1 |
| 0 | 98  | 1 | 20 | 1 | 7.3  | 0 |
| 1 | 61  | 0 | 30 | 1 | 10.5 | 0 |
| 0 | 87  | 0 | 17 | 0 | 9.7  | 0 |
| 0 | 134 | 1 | 16 | 0 | 11.7 | 0 |
| 1 | 95  | 1 | 24 | 1 | 6.9  | 0 |
| 0 | 128 | 1 | 16 | 0 | 0.2  | 1 |
| 0 | 85  | 0 | 18 | 0 | 7.6  | 0 |
| 0 | 61  | 0 | 18 | 0 | 17.2 | 1 |
| 0 | 99  | 1 | 35 | 1 | 28.9 | 1 |
| 1 | 133 | 1 | 38 | 1 | 17.3 | 1 |
| 0 | 79  | 0 | 16 | 0 | 3.4  | 1 |
| 0 | 87  | 0 | 28 | 1 | 9.1  | 0 |
| 0 | 135 | 1 | 20 | 1 | 9.7  | 0 |
| 0 | 72  | 0 | 18 | 0 | 4.7  | 0 |
| 0 | 115 | 1 | 18 | 0 | 6.6  | 0 |
| 0 | 82  | 0 | 18 | 0 | 6.6  | 0 |
| 1 | 80  | 0 | 24 | 1 | 3.1  | 1 |

|   |     |   |    |      |      |   |
|---|-----|---|----|------|------|---|
| 0 | 116 | 1 | 28 | 1    | 7.4  | 0 |
| 1 | 99  | 1 | 16 | 0    | 12.8 | 1 |
| 0 | 105 | 1 | 20 | 1    | 5.4  | 0 |
| 0 | 50  | 0 | 24 | 1    | 0.9  | 1 |
| 0 | 58  | 0 | 18 | 0    | 7.3  | 0 |
| 0 | 70  | 0 | 40 | 1    | 0    | 1 |
| 0 | 90  | 1 | 24 | 1 NA | NA   |   |
| 0 | 75  | 0 | 18 | 0    | 22.1 | 1 |
| 1 | 117 | 1 | 22 | 1    | 4.3  | 0 |
| 1 | 68  | 0 | 24 | 1    | 4.9  | 0 |
| 0 | 97  | 1 | 19 | 0    | 4.2  | 0 |
| 0 | 56  | 0 | 20 | 1    | 6.7  | 0 |
| 0 | 85  | 0 | 20 | 1    | 7.9  | 0 |
| 1 | 62  | 0 | 18 | 0    | 2.1  | 1 |
| 0 | 95  | 1 | 19 | 0    | 4.5  | 0 |
| 1 | 84  | 0 | 19 | 0    | 8.7  | 0 |
| 0 | 65  | 0 | 18 | 0    | 5.1  | 0 |
| 0 | 60  | 0 | 18 | 0    | 5.8  | 0 |
| 0 | 137 | 1 | 42 | 1    | 14.5 | 1 |
| 0 | 82  | 0 | 26 | 1    | 6.9  | 0 |
| 0 | 105 | 1 | 20 | 1    | 12   | 1 |
| 0 | 58  | 0 | 18 | 0    | 5.8  | 0 |
| 0 | 75  | 0 | 20 | 1    | 8.7  | 0 |
| 0 | 99  | 1 | 32 | 1    | 8.3  | 0 |
| 0 | 76  | 0 | 16 | 0    | 5.9  | 0 |
| 0 | 73  | 0 | 16 | 0    | 6.9  | 0 |
| 0 | 119 | 1 | 28 | 1    | 14   | 1 |
| 0 | 111 | 1 | 20 | 1    | 6.1  | 0 |
| 0 | 108 | 1 | 20 | 1    | 5.7  | 0 |
| 0 | 89  | 0 | 26 | 1    | 6.2  | 0 |
| 0 | 87  | 0 | 20 | 1    | 7.1  | 0 |
| 0 | 88  | 0 | 20 | 1    | 5.4  | 0 |
| 1 | 118 | 1 | 16 | 0    | 10.9 | 0 |
| 1 | 93  | 1 | 18 | 0    | 4.7  | 0 |
| 0 | 69  | 0 | 18 | 0    | 16.8 | 1 |
| 0 | 96  | 1 | 20 | 1    | 5.2  | 0 |
| 0 | 72  | 0 | 22 | 1    | 10.9 | 0 |
| 0 | 81  | 0 | 20 | 1    | 0    | 1 |
| 0 | 106 | 1 | 26 | 1    | 6.4  | 0 |
| 0 | 80  | 0 | 26 | 1    | 7.5  | 0 |
| 0 | 78  | 0 | 18 | 0    | 7.7  | 0 |
| 0 | 87  | 0 | 28 | 1    | 15.9 | 1 |
| 0 | 94  | 1 | 20 | 1    | 5.1  | 0 |
| 0 | 90  | 1 | 22 | 1    | 0    | 1 |
| 0 | 98  | 1 | 20 | 1    | 11.1 | 0 |

|   |     |   |    |   |      |   |
|---|-----|---|----|---|------|---|
| 0 | 107 | 1 | 35 | 1 | 8.2  | 0 |
| 0 | 82  | 0 | 20 | 1 | 7.5  | 0 |
| 1 | 113 | 1 | 20 | 1 | 10.8 | 0 |
| 1 | 101 | 1 | 18 | 0 | 5.7  | 0 |
| 0 | 102 | 1 | 18 | 0 | 4.5  | 0 |
| 0 | 110 | 1 | 24 | 1 | 6.5  | 0 |
| 0 | 110 | 1 | 28 | 1 | 0    | 1 |
| 0 | 119 | 1 | 22 | 1 | 5.7  | 0 |
| 0 | 80  | 0 | 18 | 0 | 9.6  | 0 |
| 1 | 133 | 1 | 24 | 1 | 2.9  | 1 |
| 0 | 166 | 1 | 18 | 0 | 8.7  | 0 |
| 0 | 90  | 1 | 22 | 1 | 6.4  | 0 |
| 0 | 76  | 0 | 20 | 1 | 5.5  | 0 |
| 0 | 118 | 1 | 18 | 0 | 5.5  | 0 |
| 0 | 107 | 1 | 22 | 1 | 5.3  | 0 |
| 0 | 88  | 0 | 28 | 1 | 6.6  | 0 |
| 1 | 103 | 1 | 27 | 1 | 6    | 0 |
| 1 | 81  | 0 | 21 | 1 | 6.2  | 0 |
| 1 | 130 | 1 | 32 | 1 | 14.4 | 1 |
| 0 | 89  | 0 | 20 | 1 | 5.9  | 0 |
| 0 | 121 | 1 | 36 | 1 | 5.5  | 0 |
| 0 | 105 | 1 | 22 | 1 | 6.3  | 0 |
| 0 | 67  | 0 | 19 | 0 | 6    | 0 |
| 0 | 64  | 0 | 20 | 1 | 3.8  | 1 |
| 0 | 86  | 0 | 24 | 1 | 9.7  | 0 |
| 0 | 84  | 0 | 18 | 0 | 3.4  | 1 |
| 1 | 105 | 1 | 24 | 1 | 16.8 | 1 |
| 0 | 103 | 1 | 19 | 0 | 3.4  | 1 |
| 0 | 95  | 1 | 20 | 1 | 15.9 | 1 |
| 0 | 122 | 1 | 25 | 1 | 0    | 1 |
| 0 | 83  | 0 | 16 | 0 | 8.1  | 0 |
| 0 | 69  | 0 | 17 | 0 | 10.3 | 0 |
| 0 | 116 | 1 | 18 | 0 | 6    | 0 |
| 1 | 88  | 0 | 24 | 1 | 7.8  | 0 |
| 0 | 94  | 1 | 28 | 1 | 5.7  | 0 |
| 1 | 99  | 1 | 22 | 1 | 1.7  | 1 |
| 0 | 98  | 1 | 26 | 1 | 12.6 | 1 |
| 0 | 78  | 0 | 20 | 1 | 4.7  | 0 |
| 0 | 120 | 1 | 22 | 1 | 2    | 1 |
| 0 | 131 | 1 | 24 | 1 | 2    | 1 |
| 0 | 73  | 0 | 20 | 1 | 8.6  | 0 |
| 0 | 100 | 1 | 20 | 1 | 3.4  | 1 |
| 1 | 72  | 0 | 20 | 1 | 8.3  | 0 |
| 0 | 100 | 1 | 22 | 1 | 5.2  | 0 |
| 1 | 130 | 1 | 24 | 1 | 7.4  | 0 |

|   |     |   |    |   |      |   |
|---|-----|---|----|---|------|---|
| 0 | 128 | 1 | 20 | 1 | 3.8  | 1 |
| 0 | 119 | 1 | 28 | 1 | 3.8  | 1 |
| 0 | 97  | 1 | 19 | 0 | 0    | 1 |
| 0 | 74  | 0 | 18 | 0 | 0    | 1 |
| 0 | 80  | 0 | 20 | 1 | 0    | 1 |
| 0 | 110 | 1 | 20 | 1 | 14.7 | 1 |
| 1 | 129 | 1 | 18 | 0 | 5.4  | 0 |
| 0 | 73  | 0 | 20 | 1 | 4.2  | 0 |
| 0 | 79  | 0 | 21 | 1 | 9.9  | 0 |
| 0 | 74  | 0 | 20 | 1 | 10.2 | 0 |
| 0 | 85  | 0 | 20 | 1 | 4.6  | 0 |
| 1 | 109 | 1 | 36 | 1 | 11   | 0 |
| 0 | 96  | 1 | 19 | 0 | 5    | 0 |
| 0 | 93  | 1 | 24 | 1 | 14.5 | 1 |
| 0 | 93  | 1 | 18 | 0 | 7.3  | 0 |
| 0 | 100 | 1 | 20 | 1 | 8.1  | 0 |
| 0 | 91  | 1 | 30 | 1 | 10.8 | 0 |
| 1 | 87  | 0 | 20 | 1 | 8.7  | 0 |
| 0 | 75  | 0 | 16 | 0 | 0    | 1 |
| 0 | 94  | 1 | 22 | 1 | 12.6 | 1 |
| 0 | 140 | 1 | 19 | 0 | 5.1  | 0 |
| 0 | 113 | 1 | 22 | 1 | 0    | 1 |
| 0 | 96  | 1 | 32 | 1 | 20.9 | 1 |
| 0 | 58  | 0 | 20 | 1 | 0    | 1 |
| 0 | 78  | 0 | 44 | 1 | 4.1  | 0 |
| 1 | 85  | 0 | 22 | 1 | 6.3  | 0 |
| 1 | 95  | 1 | 22 | 1 | 9.9  | 0 |
| 1 | 132 | 1 | 28 | 1 | 4.6  | 0 |
| 1 | 102 | 1 | 20 | 1 | 7.7  | 0 |
| 0 | 109 | 1 | 20 | 1 | 7.9  | 0 |
| 0 | 119 | 1 | 22 | 1 | 13.9 | 1 |
| 0 | 85  | 0 | 18 | 0 | 9.2  | 0 |
| 0 | 123 | 1 | 22 | 1 | 6.9  | 0 |
| 0 | 68  | 0 | 16 | 0 | 6.4  | 0 |
| 0 | 81  | 0 | 30 | 1 | 8.2  | 0 |
| 0 | 72  | 0 | 20 | 1 | 6.2  | 0 |
| 0 | 97  | 1 | 18 | 0 | 4.2  | 0 |
| 0 | 130 | 1 | 20 | 1 | 11.4 | 0 |
| 0 | 117 | 1 | 20 | 1 | 7.1  | 0 |
| 0 | 86  | 0 | 20 | 1 | 3.7  | 1 |
| 1 | 94  | 1 | 19 | 0 | 0    | 1 |
| 0 | 139 | 1 | 20 | 1 | 14.6 | 1 |
| 0 | 60  | 0 | 26 | 1 | 6.5  | 0 |
| 0 | 139 | 1 | 21 | 1 | 6.3  | 0 |
| 0 | 83  | 0 | 18 | 0 | 7.6  | 0 |

|   |     |   |    |   |      |   |
|---|-----|---|----|---|------|---|
| 1 | 140 | 1 | 26 | 1 | 0    | 1 |
| 0 | 113 | 1 | 22 | 1 | 0    | 1 |
| 1 | 114 | 1 | 20 | 1 | 0    | 1 |
| 1 | 61  | 0 | 20 | 1 | 10.9 | 0 |
| 0 | 122 | 1 | 22 | 1 | 7.5  | 0 |
| 0 | 116 | 1 | 26 | 1 | 12.9 | 1 |
| 0 | 119 | 1 | 23 | 1 | 6.4  | 0 |
| 0 | 92  | 1 | 22 | 1 | 6.2  | 0 |
| 1 | 124 | 1 | 22 | 1 | 6.2  | 0 |
| 1 | 128 | 1 | 40 | 1 | 11.2 | 0 |
| 0 | 127 | 1 | 44 | 1 | 0    | 1 |
| 1 | 121 | 1 | 24 | 1 | 6.8  | 0 |
| 1 | 126 | 1 | 22 | 1 | 7.2  | 0 |
| 0 | 110 | 1 | 32 | 1 | 4.6  | 0 |
| 1 | 103 | 1 | 18 | 0 | 2.7  | 1 |
| 0 | 68  | 0 | 18 | 0 | 5.9  | 0 |
| 1 | 146 | 1 | 22 | 1 | 5.2  | 0 |
| 1 | 75  | 0 | 24 | 1 | 15.2 | 1 |
| 0 | 96  | 1 | 25 | 1 | 5.3  | 0 |
| 0 | 136 | 1 | 28 | 1 | 13.2 | 1 |
| 1 | 99  | 1 | 18 | 0 | 3.3  | 1 |
| 0 | 66  | 0 | 18 | 0 | 6    | 0 |
| 0 | 72  | 0 | 20 | 1 | 6.3  | 0 |
| 0 | 116 | 1 | 21 | 1 | 7.2  | 0 |
| 0 | 76  | 0 | 20 | 1 | 5.1  | 0 |
| 0 | 89  | 0 | 13 | 0 | 7.3  | 0 |
| 0 | 80  | 0 | 20 | 1 | 3.8  | 1 |
| 0 | 86  | 0 | 28 | 1 | 10.8 | 0 |
| 1 | 89  | 0 | 19 | 0 | 3.8  | 1 |
| 0 | 73  | 0 | 16 | 0 | 0    | 1 |
| 1 | 89  | 0 | 20 | 1 | 7.1  | 0 |
| 1 | 122 | 1 | 32 | 1 | 10.8 | 0 |
| 0 | 78  | 0 | 20 | 1 | 11.3 | 0 |
| 0 | 77  | 0 | 18 | 0 | 6.1  | 0 |
| 0 | 105 | 1 | 20 | 1 | 4    | 1 |
| 0 | 61  | 0 | 22 | 1 | 9    | 0 |
| 0 | 95  | 1 | 19 | 0 | 5.5  | 0 |
| 0 | 93  | 1 | 18 | 0 | 12.8 | 1 |
| 0 | 120 | 1 | 27 | 1 | 15.9 | 1 |
| 0 | 74  | 0 | 26 | 1 | 5.1  | 0 |
| 0 | 118 | 1 | 24 | 1 | 5.1  | 0 |
| 1 | 90  | 1 | 28 | 1 | 4.6  | 0 |
| 0 | 105 | 1 | 18 | 0 | 5.1  | 0 |
| 1 | 137 | 1 | 24 | 1 | 6.4  | 0 |
| 0 | 64  | 0 | 17 | 0 | 4.6  | 0 |

|   |     |   |    |   |      |   |
|---|-----|---|----|---|------|---|
| 0 | 96  | 1 | 20 | 1 | 0    | 1 |
| 1 | 80  | 0 | 17 | 0 | 4.8  | 0 |
| 0 | 89  | 0 | 22 | 1 | 4.6  | 0 |
| 0 | 118 | 1 | 23 | 1 | 2    | 1 |
| 0 | 113 | 1 | 20 | 1 | 6.5  | 0 |
| 0 | 80  | 0 | 20 | 1 | 8.4  | 0 |
| 1 | 91  | 1 | 20 | 1 | 6.6  | 0 |
| 1 | 114 | 1 | 22 | 1 | 4.2  | 0 |
| 0 | 99  | 1 | 22 | 1 | 4.4  | 0 |
| 0 | 91  | 1 | 20 | 1 | 8.6  | 0 |
| 0 | 112 | 1 | 22 | 1 | 5.3  | 0 |
| 0 | 106 | 1 | 20 | 1 | 11.2 | 0 |
| 0 | 112 | 1 | 24 | 1 | 9.6  | 0 |
| 0 | 101 | 1 | 18 | 0 | 0    | 1 |
| 0 | 100 | 1 | 17 | 0 | 6.3  | 0 |
| 0 | 92  | 1 | 16 | 0 | 11   | 0 |
| 1 | 130 | 1 | 20 | 1 | 3.9  | 1 |
| 0 | 86  | 0 | 22 | 1 | 8.2  | 0 |
| 0 | 105 | 1 | 18 | 0 | 8.8  | 0 |
| 1 | 176 | 1 | 39 | 1 | 11   | 0 |
| 0 | 106 | 1 | 22 | 1 | 4    | 1 |
| 1 | 103 | 1 | 30 | 1 | 10.1 | 0 |
| 1 | 93  | 1 | 34 | 1 | 9.8  | 0 |
| 0 | 69  | 0 | 20 | 1 | 7.1  | 0 |
| 0 | 85  | 0 | 16 | 0 | 3.5  | 1 |
| 0 | 79  | 0 | 21 | 1 | 13.1 | 1 |
| 1 | 78  | 0 | 22 | 1 | 8.6  | 0 |
| 1 | 84  | 0 | 17 | 0 | 3.8  | 1 |
| 0 | 105 | 1 | 20 | 1 | 4.6  | 0 |
| 0 | 72  | 0 | 22 | 1 | 14.6 | 1 |
| 1 | 120 | 1 | 19 | 0 | 8    | 0 |
| 1 | 119 | 1 | 40 | 1 | 9.1  | 0 |
| 1 | 92  | 1 | 24 | 1 | 6.7  | 0 |
| 0 | 104 | 1 | 18 | 0 | 4.6  | 0 |
| 0 | 92  | 1 | 20 | 1 | 8.3  | 0 |
| 0 | 54  | 0 | 18 | 0 | 5.9  | 0 |
| 0 | 99  | 1 | 16 | 0 | 3.4  | 1 |
| 1 | 104 | 1 | 18 | 0 | 8.3  | 0 |
| 1 | 108 | 1 | 20 | 1 | 5.9  | 0 |
| 0 | 100 | 1 | 18 | 0 | 9.7  | 0 |
| 0 | 147 | 1 | 30 | 1 | 7.2  | 0 |
| 0 | 87  | 0 | 29 | 1 | 7.6  | 0 |
| 0 | 64  | 0 | 20 | 1 | 7.9  | 0 |
| 0 | 69  | 0 | 16 | 0 | 0    | 1 |
| 1 | 82  | 0 | 22 | 1 | 6.2  | 0 |

|   |     |   |    |   |      |   |
|---|-----|---|----|---|------|---|
| 1 | 121 | 1 | 26 | 1 | 9.9  | 0 |
| 1 | 103 | 1 | 20 | 1 | 5.2  | 0 |
| 0 | 88  | 0 | 16 | 0 | 7.6  | 0 |
| 1 | 96  | 1 | 32 | 1 | 9.5  | 0 |
| 0 | 74  | 0 | 18 | 0 | 3.7  | 1 |
| 0 | 104 | 1 | 18 | 0 | 7.2  | 0 |
| 0 | 138 | 1 | 18 | 0 | 6.1  | 0 |
| 0 | 101 | 1 | 28 | 1 | 5.3  | 0 |
| 1 | 114 | 1 | 18 | 0 | 4.3  | 0 |
| 0 | 113 | 1 | 20 | 1 | 4.5  | 0 |
| 0 | 116 | 1 | 18 | 0 | 6.7  | 0 |
| 0 | 90  | 1 | 22 | 1 | 3.7  | 1 |
| 0 | 90  | 1 | 20 | 1 | 9.3  | 0 |
| 0 | 80  | 0 | 18 | 0 | 2.4  | 1 |
| 0 | 85  | 0 | 18 | 0 | 4.6  | 0 |
| 0 | 63  | 0 | 22 | 1 | 8    | 0 |
| 0 | 76  | 0 | 20 | 1 | 6.2  | 0 |
| 0 | 74  | 0 | 18 | 0 | 6.9  | 0 |
| 0 | 110 | 1 | 19 | 0 | 10.8 | 0 |
| 0 | 107 | 1 | 24 | 1 | 7.6  | 0 |
| 0 | 87  | 0 | 18 | 0 | 13.6 | 1 |
| 1 | 72  | 0 | 18 | 0 | 12.9 | 1 |
| 0 | 91  | 1 | 18 | 0 | 8.5  | 0 |
| 0 | 118 | 1 | 22 | 1 | 10.3 | 0 |
| 0 | 90  | 1 | 20 | 1 | 12.5 | 1 |
| 0 | 78  | 0 | 20 | 1 | 5.8  | 0 |
| 0 | 89  | 0 | 30 | 1 | 3.7  | 1 |
| 0 | 122 | 1 | 28 | 1 | 11.1 | 0 |
| 1 | 116 | 1 | 22 | 1 | 15.1 | 1 |
| 0 | 122 | 1 | 24 | 1 | 15.8 | 1 |
| 0 | 127 | 1 | 24 | 1 | 17.4 | 1 |
| 1 | 88  | 0 | 20 | 1 | 10.5 | 0 |
| 1 | 123 | 1 | 28 | 1 | 2.8  | 1 |
| 0 | 81  | 0 | 16 | 0 | 10.3 | 0 |
| 0 | 85  | 0 | 24 | 1 | 16   | 1 |
| 0 | 103 | 1 | 18 | 0 | 9.4  | 0 |
| 0 | 127 | 1 | 19 | 0 | 9.9  | 0 |
| 1 | 59  | 0 | 28 | 1 | 12.5 | 1 |
| 0 | 122 | 1 | 34 | 1 | 31.5 | 1 |
| 0 | 60  | 0 | 16 | 0 | 4.2  | 0 |
| 1 | 74  | 0 | 22 | 1 | 6.1  | 0 |
| 0 | 52  | 0 | 20 | 1 | 10   | 0 |
| 0 | 124 | 1 | 26 | 1 | 5.3  | 0 |
| 0 | 100 | 1 | 34 | 1 | 9.8  | 0 |
| 0 | 122 | 1 | 23 | 1 | 14.5 | 1 |

|   |     |   |    |   |      |   |
|---|-----|---|----|---|------|---|
| 0 | 85  | 0 | 28 | 1 | 6.2  | 0 |
| 1 | 104 | 1 | 27 | 1 | 14.4 | 1 |
| 0 | 70  | 0 | 20 | 1 | 7.6  | 0 |
| 0 | 83  | 0 | 20 | 1 | 0    | 1 |
| 0 | 98  | 1 | 22 | 1 | 15.2 | 1 |
| 0 | 124 | 1 | 28 | 1 | 6.4  | 0 |
| 0 | 130 | 1 | 42 | 1 | 9.7  | 0 |
| 0 | 85  | 0 | 22 | 1 | 9.8  | 0 |
| 0 | 115 | 1 | 26 | 1 | 5.2  | 0 |
| 1 | 60  | 0 | 26 | 1 | 11.5 | 0 |
| 0 | 90  | 1 | 20 | 1 | 6.7  | 0 |
| 0 | 83  | 0 | 24 | 1 | 5.6  | 0 |
| 0 | 96  | 1 | 20 | 1 | 6.7  | 0 |
| 0 | 110 | 1 | 20 | 1 | 4.3  | 0 |
| 0 | 88  | 0 | 19 | 0 | 12   | 1 |
| 0 | 105 | 1 | 18 | 0 | 11.6 | 0 |
| 1 | 133 | 1 | 24 | 1 | 9.7  | 0 |
| 1 | 109 | 1 | 24 | 1 | 8.7  | 0 |
| 0 | 107 | 1 | 26 | 1 | 8.2  | 0 |
| 0 | 70  | 0 | 30 | 1 | 23.5 | 1 |
| 0 | 105 | 1 | 19 | 0 | 4.6  | 0 |
| 0 | 74  | 0 | 18 | 0 | 7.1  | 0 |
| 0 | 78  | 0 | 20 | 1 | 8.7  | 0 |
| 0 | 69  | 0 | 18 | 0 | 3.4  | 1 |
| 0 | 91  | 1 | 16 | 0 | 0    | 1 |
| 1 | 94  | 1 | 20 | 1 | 3.9  | 1 |
| 1 | 102 | 1 | 24 | 1 | 13.5 | 1 |
| 1 | 75  | 0 | 28 | 1 | 18.5 | 1 |
| 1 | 104 | 1 | 16 | 0 | 5.7  | 0 |
| 0 | 107 | 1 | 22 | 1 | 8.3  | 0 |
| 1 | 103 | 1 | 26 | 1 | 8.3  | 0 |
| 0 | 116 | 1 | 20 | 1 | 4.2  | 0 |
| 0 | 87  | 0 | 18 | 0 | 3.5  | 1 |
| 0 | 88  | 0 | 22 | 1 | 1.6  | 1 |
| 1 | 108 | 1 | 22 | 1 | 4.4  | 0 |
| 0 | 81  | 0 | 18 | 0 | 7.4  | 0 |
| 0 | 87  | 0 | 22 | 1 | 7.6  | 0 |
| 0 | 79  | 0 | 22 | 1 | 8.9  | 0 |
| 0 | 107 | 1 | 18 | 0 | 6.1  | 0 |
| 0 | 73  | 0 | 20 | 1 | 3.8  | 1 |
| 0 | 70  | 0 | 20 | 1 | 6.2  | 0 |
| 1 | 87  | 0 | 20 | 1 | 0    | 1 |
| 0 | 85  | 0 | 20 | 1 | 0    | 1 |
| 0 | 63  | 0 | 22 | 1 | 5.3  | 0 |
| 0 | 102 | 1 | 20 | 1 | 3.8  | 1 |



|   |     |   |    |   |      |   |
|---|-----|---|----|---|------|---|
| 0 | 75  | 0 | 18 | 0 | 13.7 | 1 |
| 1 | 110 | 1 | 22 | 1 | 5.7  | 0 |
| 0 | 91  | 1 | 28 | 1 | 13   | 1 |
| 0 | 94  | 1 | 22 | 1 | 12.8 | 1 |
| 0 | 91  | 1 | 20 | 1 | 10.2 | 0 |
| 0 | 80  | 0 | 18 | 0 | 8.1  | 0 |
| 0 | 112 | 1 | 22 | 1 | 5.5  | 0 |
| 0 | 87  | 0 | 24 | 1 | 5.6  | 0 |
| 0 | 133 | 1 | 19 | 0 | 9.8  | 0 |
| 0 | 106 | 1 | 24 | 1 | 8.5  | 0 |
| 1 | 85  | 0 | 18 | 0 | 4.9  | 0 |
| 0 | 77  | 0 | 20 | 1 | 4.9  | 0 |
| 0 | 73  | 0 | 18 | 0 | 0    | 1 |
| 0 | 82  | 0 | 18 | 0 | 11.8 | 0 |
| 0 | 117 | 1 | 18 | 0 | 12   | 1 |
| 0 | 104 | 1 | 16 | 0 | 10   | 0 |
| 0 | 71  | 0 | 16 | 0 | 4.8  | 0 |
| 1 | 131 | 1 | 32 | 1 | 11.9 | 0 |
| 0 | 82  | 0 | 35 | 1 | 9.4  | 0 |
| 0 | 98  | 1 | 20 | 1 | 8.1  | 0 |
| 0 | 77  | 0 | 30 | 1 | 6.6  | 0 |
| 0 | 101 | 1 | 27 | 1 | 8.6  | 0 |
| 0 | 80  | 0 | 22 | 1 | 3.1  | 1 |
| 0 | 102 | 1 | 28 | 1 | 6.4  | 0 |
| 0 | 76  | 0 | 21 | 1 | 3.8  | 1 |
| 0 | 78  | 0 | 18 | 0 | 5    | 0 |
| 1 | 96  | 1 | 17 | 0 | 13.9 | 1 |
| 1 | 122 | 1 | 16 | 0 | 2.9  | 1 |
| 0 | 120 | 1 | 24 | 1 | 10.8 | 0 |
| 0 | 93  | 1 | 20 | 1 | 0    | 1 |
| 0 | 63  | 0 | 20 | 1 | 14.7 | 1 |
| 0 | 101 | 1 | 26 | 1 | 21.8 | 1 |
| 0 | 67  | 0 | 22 | 1 | 10.4 | 0 |
| 0 | 93  | 1 | 16 | 0 | 10.4 | 0 |
| 0 | 84  | 0 | 20 | 1 | 8.7  | 0 |
| 0 | 117 | 1 | 16 | 0 | 5.4  | 0 |
| 1 | 136 | 1 | 42 | 1 | 19.4 | 1 |
| 0 | 69  | 0 | 26 | 1 | 10.2 | 0 |
| 1 | 105 | 1 | 38 | 1 | 6.3  | 0 |
| 0 | 64  | 0 | 20 | 1 | 0    | 1 |
| 0 | 82  | 0 | 20 | 1 | 6.1  | 0 |
| 0 | 20  | 0 | 20 | 1 | 10   | 0 |
| 0 | 143 | 1 | 20 | 1 | 6.4  | 0 |
| 0 | 107 | 1 | 18 | 0 | 5.3  | 0 |
| 0 | 124 | 1 | 22 | 1 | 2.2  | 1 |

|   |     |   |    |   |      |   |
|---|-----|---|----|---|------|---|
| 0 | 118 | 1 | 20 | 1 | 4.5  | 0 |
| 0 | 90  | 1 | 18 | 0 | 5.5  | 0 |
| 0 | 68  | 0 | 19 | 0 | 11.7 | 0 |
| 0 | 94  | 1 | 20 | 1 | 8    | 0 |
| 0 | 60  | 0 | 18 | 0 | 3.9  | 1 |
| 0 | 88  | 0 | 48 | 1 | 3.5  | 1 |
| 0 | 90  | 1 | 20 | 1 | 4.4  | 0 |
| 0 | 94  | 1 | 28 | 1 | 4.3  | 0 |
| 0 | 71  | 0 | 16 | 0 | 0    | 1 |
| 0 | 98  | 1 | 24 | 1 | 0    | 1 |
| 0 | 78  | 0 | 18 | 0 | 6.5  | 0 |
| 0 | 102 | 1 | 25 | 1 | 9.5  | 0 |
| 0 | 120 | 1 | 22 | 1 | 7.5  | 0 |
| 0 | 86  | 0 | 18 | 0 | 4.3  | 0 |
| 1 | 58  | 0 | 20 | 1 | 5.9  | 0 |
| 0 | 105 | 1 | 32 | 1 | 5.4  | 0 |
| 0 | 88  | 0 | 16 | 0 | 8.1  | 0 |
| 0 | 102 | 1 | 16 | 0 | 3.5  | 1 |
| 0 | 110 | 1 | 19 | 0 | 25.6 | 1 |
| 0 | 69  | 0 | 18 | 0 | 4.5  | 0 |
| 0 | 76  | 0 | 19 | 0 | 3.3  | 1 |
| 1 | 114 | 1 | 22 | 1 | 4.2  | 0 |
| 1 | 131 | 1 | 32 | 1 | 10.3 | 0 |
| 0 | 119 | 1 | 20 | 1 | 7.3  | 0 |
| 0 | 92  | 1 | 18 | 0 | 21.9 | 1 |
| 0 | 90  | 1 | 24 | 1 | 3.8  | 1 |
| 1 | 115 | 1 | 22 | 1 | 8.1  | 0 |
| 0 | 96  | 1 | 18 | 0 | 10.2 | 0 |
| 0 | 130 | 1 | 22 | 1 | 14.7 | 1 |
| 0 | 69  | 0 | 18 | 0 | 13.6 | 1 |
| 0 | 65  | 0 | 22 | 1 | 12   | 1 |
| 0 | 62  | 0 | 20 | 1 | 7    | 0 |
| 0 | 82  | 0 | 20 | 1 | 5.9  | 0 |
| 0 | 96  | 1 | 14 | 0 | 7.6  | 0 |
| 0 | 91  | 1 | 16 | 0 | 15.3 | 1 |
| 0 | 95  | 1 | 22 | 1 | 4.8  | 0 |
| 1 | 87  | 0 | 24 | 1 | 5.6  | 0 |
| 1 | 113 | 1 | 22 | 1 | 8.4  | 0 |
| 0 | 109 | 1 | 20 | 1 | 5.7  | 0 |
| 0 | 24  | 0 | 24 | 1 | 5.5  | 0 |
| 1 | 120 | 1 | 18 | 0 | 13.8 | 1 |
| 0 | 160 | 1 | 20 | 1 | 6    | 0 |
| 0 | 110 | 1 | 22 | 1 | 6.4  | 0 |
| 0 | 63  | 0 | 26 | 1 | 5    | 0 |
| 1 | 104 | 1 | 18 | 0 | 3    | 1 |

|   |     |   |    |   |      |   |
|---|-----|---|----|---|------|---|
| 1 | 83  | 0 | 18 | 0 | 3.3  | 1 |
| 0 | 71  | 0 | 22 | 1 | 3    | 1 |
| 1 | 93  | 1 | 30 | 1 | 20.5 | 1 |
| 0 | 105 | 1 | 20 | 1 | 6.7  | 0 |
| 0 | 83  | 0 | 24 | 1 | 4.5  | 0 |
| 0 | 83  | 0 | 20 | 1 | 2.3  | 1 |
| 0 | 82  | 0 | 26 | 1 | 7.5  | 0 |
| 0 | 88  | 0 | 25 | 1 | 9.9  | 0 |
| 0 | 104 | 1 | 22 | 1 | 7.1  | 0 |
| 0 | 69  | 0 | 18 | 0 | 5.2  | 0 |
| 0 | 53  | 0 | 20 | 1 | 6.9  | 0 |
| 0 | 116 | 1 | 18 | 0 | 3.9  | 1 |
| 0 | 129 | 1 | 34 | 1 | 4    | 1 |
| 0 | 97  | 1 | 18 | 0 | 4    | 1 |
| 1 | 76  | 0 | 18 | 0 | 7    | 0 |
| 1 | 120 | 1 | 20 | 1 | 16.1 | 1 |
| 0 | 117 | 1 | 18 | 0 | 3.8  | 1 |
| 0 | 165 | 1 | 36 | 1 | 0    | 1 |
| 0 | 105 | 1 | 16 | 0 | 2.8  | 1 |
| 0 | 114 | 1 | 24 | 1 | 5.2  | 0 |
| 0 | 99  | 1 | 22 | 1 | 9.3  | 0 |
| 0 | 125 | 1 | 28 | 1 | 5    | 0 |
| 1 | 113 | 1 | 20 | 1 | 10.5 | 0 |
| 0 | 75  | 0 | 18 | 0 | 0    | 1 |
| 1 | 150 | 1 | 24 | 1 | 0    | 1 |
| 1 | 130 | 1 | 18 | 0 | 8.6  | 0 |
| 0 | 91  | 1 | 26 | 1 | 16.8 | 1 |
| 1 | 115 | 1 | 30 | 1 | 7.3  | 0 |
| 0 | 83  | 0 | 16 | 0 | 5.8  | 0 |
| 1 | 94  | 1 | 24 | 1 | 5    | 0 |
| 0 | 100 | 1 | 26 | 1 | 6.4  | 0 |
| 0 | 99  | 1 | 22 | 1 | 9    | 0 |
| 1 | 111 | 1 | 24 | 1 | 25.2 | 1 |
| 0 | 103 | 1 | 20 | 1 | 4.7  | 0 |
| 0 | 96  | 1 | 28 | 1 | 6.1  | 0 |
| 1 | 70  | 0 | 24 | 1 | 4.2  | 0 |
| 0 | 79  | 0 | 20 | 1 | 7.5  | 0 |
| 0 | 112 | 1 | 18 | 0 | 7    | 0 |
| 0 | 84  | 0 | 20 | 1 | 4.6  | 0 |
| 0 | 83  | 0 | 20 | 1 | 9.8  | 0 |
| 1 | 69  | 0 | 16 | 0 | 4    | 1 |
| 0 | 94  | 1 | 18 | 0 | 6.1  | 0 |
| 0 | 81  | 0 | 22 | 1 | 4.5  | 0 |
| 0 | 95  | 1 | 20 | 1 | 7.4  | 0 |
| 1 | 107 | 1 | 24 | 1 | 5.1  | 0 |

|      |     |   |    |   |       |   |
|------|-----|---|----|---|-------|---|
| 0    | 100 | 1 | 36 | 1 | 7.5   | 0 |
| 1    | 70  | 0 | 22 | 1 | 9     | 0 |
| 0    | 96  | 1 | 22 | 1 | 7.3   | 0 |
| 0    | 110 | 1 | 19 | 0 | 12.7  | 1 |
| 0    | 52  | 0 | 18 | 0 | 20.7  | 1 |
| 0    | 96  | 1 | 21 | 1 | 4.9   | 0 |
| 0    | 79  | 0 | 30 | 1 | 12    | 1 |
| 0    | 60  | 0 | 19 | 0 | 9     | 0 |
| 1    | 137 | 1 | 20 | 1 | 16.5  | 1 |
| 0    | 101 | 1 | 26 | 1 | 0     | 1 |
| 0    | 83  | 0 | 28 | 1 | 6.8   | 0 |
| 1    | 100 | 1 | 20 | 1 | 7.8   | 0 |
| 0    | 112 | 1 | 20 | 1 | 0     | 1 |
| 0    | 79  | 0 | 16 | 0 | 7.7   | 0 |
| 1    | 121 | 1 | 24 | 1 | 5.7   | 0 |
| 1    | 120 | 1 | 26 | 1 | 4.8   | 0 |
| 0 NA | NA  |   | 20 | 1 | 5.8   | 0 |
| 0    | 72  | 0 | 22 | 1 | 6.8   | 0 |
| 1    | 125 | 1 | 22 | 1 | 6.1   | 0 |
| 0    | 74  | 0 | 18 | 0 | 5.9   | 0 |
| 0    | 114 | 1 | 22 | 1 | 8     | 0 |
| 0    | 126 | 1 | 19 | 0 | 25.7  | 1 |
| 0    | 114 | 1 | 18 | 0 | 6.7   | 0 |
| 0    | 123 | 1 | 12 | 0 | 6.7   | 0 |
| 0    | 68  | 0 | 16 | 0 | 5     | 0 |
| 0    | 80  | 0 | 18 | 0 | 7.3   | 0 |
| 0    | 67  | 0 | 24 | 1 | 7     | 0 |
| 1    | 77  | 0 | 24 | 1 | 4.3   | 0 |
| 1    | 109 | 1 | 22 | 1 | 12.8  | 1 |
| 0    | 90  | 1 | 20 | 1 | 6.3   | 0 |
| 0    | 97  | 1 | 20 | 1 | 5.6   | 0 |
| 0    | 90  | 1 | 20 | 1 | 13.9  | 1 |
| 0    | 98  | 1 | 32 | 1 | 156.2 | 1 |
| 0    | 122 | 1 | 22 | 1 | 6     | 0 |
| 0    | 71  | 0 | 18 | 0 | 5.6   | 0 |
| 0    | 24  | 0 | 24 | 1 | 7.5   | 0 |
| 0    | 52  | 0 | 16 | 0 | 4.2   | 0 |
| 0    | 99  | 1 | 20 | 1 | 21.8  | 1 |
| 0    | 104 | 1 | 16 | 0 | 11    | 0 |
| 0    | 91  | 1 | 18 | 0 | 12.4  | 1 |
| 1    | 101 | 1 | 34 | 1 | 0     | 1 |
| 0 NA |     | 0 | 20 | 1 | 15    | 1 |
| 0    | 80  | 0 | 24 | 1 | 6.5   | 0 |
| 0    | 116 | 1 | 18 | 0 | 3.3   | 1 |
| 0    | 90  | 1 | 23 | 1 | 7.7   | 0 |

|   |     |   |    |   |      |   |
|---|-----|---|----|---|------|---|
| 1 | 64  | 0 | 24 | 1 | 6.1  | 0 |
| 1 | 104 | 1 | 22 | 1 | 8.2  | 0 |
| 0 | 71  | 0 | 20 | 1 | 7.3  | 0 |
| 0 | 108 | 1 | 22 | 1 | 5.7  | 0 |
| 0 | 87  | 0 | 20 | 1 | 4.9  | 0 |
| 0 | 73  | 0 | 26 | 1 | 8.5  | 0 |
| 0 | 88  | 0 | 20 | 1 | 4.5  | 0 |
| 0 | 87  | 0 | 18 | 0 | 5.8  | 0 |
| 0 | 87  | 0 | 20 | 1 | 3.9  | 1 |
| 0 | 103 | 1 | 20 | 1 | 3.3  | 1 |
| 0 | 125 | 1 | 22 | 1 | 4.8  | 0 |
| 1 | 69  | 0 | 18 | 0 | 4.2  | 0 |
| 0 | 97  | 1 | 18 | 0 | 4.2  | 0 |
| 0 | 74  | 0 | 26 | 1 | 5.4  | 0 |
| 0 | 113 | 1 | 24 | 1 | 7.1  | 0 |
| 0 | 89  | 0 | 20 | 1 | 4.3  | 0 |
| 0 | 112 | 1 | 16 | 0 | 5.1  | 0 |
| 1 | 84  | 0 | 22 | 1 | 7.8  | 0 |
| 0 | 67  | 0 | 26 | 1 | 9.5  | 0 |
| 1 | 101 | 1 | 18 | 0 | 6.5  | 0 |
| 1 | 79  | 0 | 20 | 1 | 10.6 | 0 |
| 1 | 108 | 1 | 18 | 0 | 4.1  | 0 |
| 0 | 99  | 1 | 16 | 0 | 5.3  | 0 |
| 0 | 64  | 0 | 18 | 0 | 7.4  | 0 |
| 1 | 92  | 1 | 22 | 1 | 4.1  | 0 |
| 0 | 86  | 0 | 18 | 0 | 3.3  | 1 |
| 0 | 94  | 1 | 20 | 1 | 4.4  | 0 |
| 0 | 84  | 0 | 24 | 1 | 7    | 0 |
| 1 | 149 | 1 | 33 | 1 | 9.8  | 0 |
| 1 | 113 | 1 | 22 | 1 | 0    | 1 |
| 0 | 102 | 1 | 18 | 0 | 6.9  | 0 |
| 0 | 66  | 0 | 20 | 1 | 4.5  | 0 |
| 0 | 94  | 1 | 19 | 0 | 3.4  | 1 |
| 0 | 105 | 1 | 20 | 1 | 5.5  | 0 |
| 1 | 127 | 1 | 24 | 1 | 9.7  | 0 |
| 1 | 111 | 1 | 24 | 1 | 9.6  | 0 |
| 1 | 70  | 0 | 18 | 0 | 4.5  | 0 |
| 0 | 88  | 0 | 32 | 1 | 9    | 0 |
| 0 | 114 | 1 | 18 | 0 | 5.5  | 0 |
| 0 | 105 | 1 | 24 | 1 | 7.1  | 0 |
| 0 | 120 | 1 | 24 | 1 | 8.3  | 0 |
| 1 | 95  | 1 | 20 | 1 | 4.5  | 0 |
| 0 | 78  | 0 | 28 | 1 | 3.4  | 1 |
| 0 | 86  | 0 | 18 | 0 | 8.1  | 0 |
| 0 | 118 | 1 | 20 | 1 | 6.8  | 0 |

|      |     |   |    |   |      |   |
|------|-----|---|----|---|------|---|
| 1    | 112 | 1 | 18 | 0 | 5.8  | 0 |
| 0    | 156 | 1 | 20 | 1 | 4.6  | 0 |
| 0    | 80  | 0 | 18 | 0 | 4.1  | 0 |
| 0    | 138 | 1 | 18 | 0 | 11.3 | 0 |
| 0    | 94  | 1 | 18 | 0 | 7.6  | 0 |
| 1    | 109 | 1 | 24 | 1 | 6.4  | 0 |
| 1    | 145 | 1 | 25 | 1 | 7.5  | 0 |
| 0    | 87  | 0 | 20 | 1 | 5.5  | 0 |
| 1    | 101 | 1 | 18 | 0 | 7.9  | 0 |
| 1    | 87  | 0 | 18 | 0 | 3.4  | 1 |
| 0    | 74  | 0 | 20 | 1 | 3.1  | 1 |
| 0    | 92  | 1 | 36 | 1 | 5    | 0 |
| 1    | 110 | 1 | 24 | 1 | 6.7  | 0 |
| 0    | 135 | 1 | 22 | 1 | 9.5  | 0 |
| 0    | 64  | 0 | 16 | 0 | 5.9  | 0 |
| 0    | 66  | 0 | 42 | 1 | 8.9  | 0 |
| 0    | 91  | 1 | 19 | 0 | 14.5 | 1 |
| 0    | 82  | 0 | 18 | 0 | 6.7  | 0 |
| 0    | 66  | 0 | 18 | 0 | 6.2  | 0 |
| 1 NA |     | 0 | 22 | 1 | 7    | 0 |
| 1    | 95  | 1 | 18 | 0 | 7.1  | 0 |
| 1    | 114 | 1 | 36 | 1 | 7.3  | 0 |
| 0    | 82  | 0 | 24 | 1 | 4.3  | 0 |
| 0    | 94  | 1 | 20 | 1 | 7.8  | 0 |
| 0    | 102 | 1 | 22 | 1 | 6.4  | 0 |
| 0    | 107 | 1 | 18 | 0 | 6.1  | 0 |
| 0    | 98  | 1 | 21 | 1 | 7    | 0 |
| 0    | 97  | 1 | 32 | 1 | 5.3  | 0 |
| 0    | 98  | 1 | 20 | 1 | 6.9  | 0 |
| 0    | 72  | 0 | 21 | 1 | 9.2  | 0 |
| 0    | 80  | 0 | 16 | 0 | 5.8  | 0 |
| 0    | 90  | 1 | 20 | 1 | 5.2  | 0 |
| 1    | 80  | 0 | 18 | 0 | 5    | 0 |
| 0    | 119 | 1 | 19 | 0 | 9.5  | 0 |
| 0    | 75  | 0 | 20 | 1 | 5    | 0 |
| 1    | 107 | 1 | 18 | 0 | 0    | 1 |
| 0    | 98  | 1 | 24 | 1 | 0    | 1 |
| 0    | 89  | 0 | 24 | 1 | 10.6 | 0 |
| 0    | 71  | 0 | 24 | 1 | 8.3  | 0 |
| 0    | 70  | 0 | 22 | 1 | 4.2  | 0 |
| 0    | 104 | 1 | 22 | 1 | 6.4  | 0 |
| 0    | 105 | 1 | 24 | 1 | 5.4  | 0 |
| 0    | 88  | 0 | 22 | 1 | 4.7  | 0 |
| 0    | 107 | 1 | 40 | 1 | 13.5 | 1 |
| 0    | 79  | 0 | 30 | 1 | 8.5  | 0 |

|   |     |   |    |   |      |   |
|---|-----|---|----|---|------|---|
| 1 | 85  | 0 | 18 | 0 | 2.9  | 1 |
| 1 | 110 | 1 | 20 | 1 | 5    | 0 |
| 0 | 89  | 0 | 18 | 0 | 6.3  | 0 |
| 0 | 94  | 1 | 22 | 1 | 8.8  | 0 |
| 0 | 106 | 1 | 24 | 1 | 5    | 0 |
| 1 | 105 | 1 | 24 | 1 | 4.9  | 0 |
| 1 | 130 | 1 | 26 | 1 | 9.8  | 0 |
| 0 | 67  | 0 | 24 | 1 | 13.6 | 1 |
| 1 | 129 | 1 | 27 | 1 | 6.9  | 0 |
| 0 | 103 | 1 | 20 | 1 | 10.5 | 0 |
| 1 | 135 | 1 | 22 | 1 | 12.5 | 1 |
| 0 | 100 | 1 | 18 | 0 | 4.1  | 0 |
| 0 | 77  | 0 | 18 | 0 | 13.4 | 1 |
| 1 | 118 | 1 | 24 | 1 | 6.7  | 0 |
| 0 | 60  | 0 | 20 | 1 | 6.6  | 0 |
| 0 | 70  | 0 | 32 | 1 | 5.7  | 0 |
| 0 | 55  | 0 | 18 | 0 | 5.5  | 0 |
| 0 | 98  | 1 | 40 | 1 | 8.8  | 0 |
| 0 | 99  | 1 | 18 | 0 | 7.1  | 0 |
| 1 | 89  | 0 | 20 | 1 | 3.7  | 1 |
| 0 | 72  | 0 | 18 | 0 | 3.1  | 1 |
| 0 | 98  | 1 | 26 | 1 | 6.8  | 0 |
| 1 | 118 | 1 | 20 | 1 | 0    | 1 |
| 0 | 120 | 1 | 28 | 1 | 8.9  | 0 |
| 0 | 67  | 0 | 16 | 0 | 8.5  | 0 |
| 0 | 105 | 1 | 16 | 0 | 13.8 | 1 |
| 1 | 116 | 1 | 18 | 0 | 16.5 | 1 |
| 1 | 91  | 1 | 20 | 1 | 5.6  | 0 |
| 1 | 93  | 1 | 18 | 0 | 10.2 | 0 |
| 0 | 76  | 0 | 28 | 1 | 6.2  | 0 |
| 0 | 93  | 1 | 16 | 0 | 4.7  | 0 |
| 1 | 90  | 1 | 18 | 0 | 4.1  | 0 |
| 1 | 115 | 1 | 24 | 1 | 15.7 | 1 |
| 0 | 113 | 1 | 20 | 1 | 7.2  | 0 |
| 0 | 75  | 0 | 20 | 1 | 9    | 0 |
| 0 | 78  | 0 | 18 | 0 | 9.8  | 0 |
| 0 | 140 | 1 | 20 | 1 | 9.8  | 0 |
| 1 | 132 | 1 | 25 | 1 | 16.8 | 1 |
| 0 | 105 | 1 | 20 | 1 | 5.3  | 0 |
| 0 | 102 | 1 | 38 | 1 | 7.9  | 0 |
| 0 | 81  | 0 | 16 | 0 | 0    | 1 |
| 0 | 105 | 1 | 34 | 1 | 11.2 | 0 |
| 0 | 78  | 0 | 22 | 1 | 6.7  | 0 |
| 0 | 112 | 1 | 20 | 1 | 7    | 0 |
| 0 | 119 | 1 | 18 | 0 | 11.2 | 0 |

|   |     |   |    |   |      |   |
|---|-----|---|----|---|------|---|
| 0 | 138 | 1 | 22 | 1 | 18.6 | 1 |
| 1 | 82  | 0 | 22 | 1 | 8.7  | 0 |
| 0 | 124 | 1 | 16 | 0 | 6.5  | 0 |
| 0 | 95  | 1 | 20 | 1 | 9.9  | 0 |
| 0 | 102 | 1 | 22 | 1 | 8.9  | 0 |
| 0 | 99  | 1 | 30 | 1 | 6.9  | 0 |
| 0 | 99  | 1 | 20 | 1 | 7.9  | 0 |
| 1 | 125 | 1 | 32 | 1 | 11.7 | 0 |
| 1 | 112 | 1 | 24 | 1 | 13.1 | 1 |
| 0 | 87  | 0 | 18 | 0 | 20.2 | 1 |
| 0 | 106 | 1 | 39 | 1 | 9.3  | 0 |
| 1 | 96  | 1 | 22 | 1 | 5.4  | 0 |
| 0 | 100 | 1 | 26 | 1 | 5.4  | 0 |
| 0 | 116 | 1 | 22 | 1 | 6.1  | 0 |
| 1 | 88  | 0 | 16 | 0 | 2.8  | 1 |
| 0 | 92  | 1 | 20 | 1 | 2.2  | 1 |
| 0 | 61  | 0 | 26 | 1 | 10   | 0 |
| 1 | 97  | 1 | 19 | 0 | 13.8 | 1 |
| 0 | 96  | 1 | 28 | 1 | 11.7 | 0 |
| 0 | 84  | 0 | 18 | 0 | 6.7  | 0 |
| 0 | 87  | 0 | 18 | 0 | 0    | 1 |
| 0 | 97  | 1 | 17 | 0 | 9.3  | 0 |
| 1 | 86  | 0 | 20 | 1 | 9.6  | 0 |
| 0 | 89  | 0 | 18 | 0 | 7.4  | 0 |
| 0 | 90  | 1 | 29 | 1 | 6.3  | 0 |
| 0 | 106 | 1 | 21 | 1 | 5.8  | 0 |
| 0 | 102 | 1 | 18 | 0 | 7.8  | 0 |
| 0 | 116 | 1 | 22 | 1 | 6.3  | 0 |
| 0 | 106 | 1 | 20 | 1 | 2.3  | 1 |
| 0 | 95  | 1 | 20 | 1 | 6.1  | 0 |
| 0 | 79  | 0 | 24 | 1 | 6.3  | 0 |
| 0 | 87  | 0 | 22 | 1 | 11.6 | 0 |
| 0 | 72  | 0 | 18 | 0 | 12.2 | 1 |
| 0 | 91  | 1 | 18 | 0 | 8.5  | 0 |
| 0 | 117 | 1 | 42 | 1 | 7.6  | 0 |
| 0 | 62  | 0 | 18 | 0 | 9.7  | 0 |
| 0 | 110 | 1 | 30 | 1 | 5.2  | 0 |
| 0 | 141 | 1 | 20 | 1 | 11.9 | 0 |
| 0 | 102 | 1 | 24 | 1 | 7    | 0 |
| 0 | 161 | 1 | 26 | 1 | 8.3  | 0 |
| 0 | 94  | 1 | 16 | 0 | 6.7  | 0 |
| 0 | 89  | 0 | 18 | 0 | 3.9  | 1 |
| 0 | 94  | 1 | 20 | 1 | 8.1  | 0 |
| 0 | 61  | 0 | 18 | 0 | 4.7  | 0 |
| 1 | 123 | 1 | 24 | 1 | 9.3  | 0 |



|   |     |   |    |      |      |   |
|---|-----|---|----|------|------|---|
| 1 | 106 | 1 | 20 | 1    | 10.1 | 0 |
| 0 | 107 | 1 | 24 | 1    | 8.6  | 0 |
| 0 | 102 | 1 | 18 | 0    | 4    | 1 |
| 0 | 75  | 0 | 22 | 1    | 6.9  | 0 |
| 0 | 133 | 1 | 30 | 1    | 20.1 | 1 |
| 0 | 115 | 1 | 22 | 1 NA | NA   |   |
| 0 | 103 | 1 | 16 | 0    | 11.4 | 0 |
| 0 | 109 | 1 | 22 | 1    | 16.4 | 1 |
| 0 | 116 | 1 | 20 | 1    | 0    | 1 |
| 0 | 79  | 0 | 18 | 0    | 8.9  | 0 |
| 0 | 80  | 0 | 20 | 1    | 5.6  | 0 |
| 0 | 91  | 1 | 14 | 0    | 6.1  | 0 |
| 0 | 69  | 0 | 18 | 0    | 6.2  | 0 |
| 0 | 115 | 1 | 22 | 1    | 6.2  | 0 |
| 0 | 68  | 0 | 20 | 1    | 7.3  | 0 |
| 0 | 53  | 0 | 18 | 0    | 0    | 1 |
| 1 | 103 | 1 | 20 | 1    | 9.6  | 0 |
| 0 | 98  | 1 | 18 | 0    | 4.6  | 0 |
| 0 | 104 | 1 | 30 | 1    | 8.7  | 0 |
| 0 | 90  | 1 | 24 | 1    | 6.1  | 0 |
| 0 | 69  | 0 | 18 | 0    | 9.9  | 0 |
| 0 | 89  | 0 | 18 | 0    | 4.2  | 0 |
| 0 | 111 | 1 | 16 | 0    | 4.4  | 0 |
| 1 | 88  | 0 | 18 | 0    | 3.6  | 1 |
| 0 | 113 | 1 | 20 | 1    | 3.9  | 1 |
| 0 | 108 | 1 | 18 | 0    | 2.5  | 1 |
| 0 | 126 | 1 | 26 | 1    | 12.2 | 1 |
| 0 | 75  | 0 | 18 | 0    | 4.5  | 0 |
| 0 | 66  | 0 | 16 | 0    | 2.8  | 1 |
| 0 | 97  | 1 | 18 | 0    | 0    | 1 |
| 0 | 74  | 0 | 14 | 0    | 5.9  | 0 |
| 0 | 100 | 1 | 18 | 0    | 6.9  | 0 |
| 0 | 65  | 0 | 20 | 1    | 11.7 | 0 |
| 0 | 129 | 1 | 20 | 1    | 6.7  | 0 |
| 1 | 140 | 1 | 20 | 1    | 9.1  | 0 |
| 0 | 95  | 1 | 20 | 1    | 7.5  | 0 |
| 0 | 124 | 1 | 20 | 1    | 7.1  | 0 |
| 1 | 97  | 1 | 20 | 1    | 5.7  | 0 |
| 1 | 100 | 1 | 26 | 1    | 5.1  | 0 |
| 0 | 109 | 1 | 20 | 1    | 6.4  | 0 |
| 0 | 87  | 0 | 22 | 1    | 7.9  | 0 |
| 0 | 83  | 0 | 20 | 1    | 6.8  | 0 |
| 0 | 52  | 0 | 18 | 0    | 28.3 | 1 |
| 1 | 89  | 0 | 22 | 1    | 9.8  | 0 |
| 1 | 97  | 1 | 19 | 0    | 4.1  | 0 |

|   |     |   |    |   |      |   |
|---|-----|---|----|---|------|---|
| 1 | 141 | 1 | 20 | 1 | 6.8  | 0 |
| 0 | 74  | 0 | 36 | 1 | 4.2  | 0 |
| 0 | 88  | 0 | 18 | 0 | 6.7  | 0 |
| 1 | 104 | 1 | 28 | 1 | 10.2 | 0 |
| 0 | 68  | 0 | 20 | 1 | 6.6  | 0 |
| 0 | 75  | 0 | 16 | 0 | 9.1  | 0 |
| 0 | 88  | 0 | 20 | 1 | 0    | 1 |
| 0 | 79  | 0 | 18 | 0 | 5.6  | 0 |
| 1 | 108 | 1 | 18 | 0 | 9.1  | 0 |
| 0 | 100 | 1 | 26 | 1 | 8.3  | 0 |
| 0 | 157 | 1 | 42 | 1 | 7    | 0 |
| 0 | 89  | 0 | 22 | 1 | 5.3  | 0 |
| 1 | 70  | 0 | 25 | 1 | 5.8  | 0 |
| 0 | 91  | 1 | 24 | 1 | 4.4  | 0 |
| 1 | 67  | 0 | 17 | 0 | 10.4 | 0 |
| 1 | 125 | 1 | 22 | 1 | 9.3  | 0 |
| 1 | 90  | 1 | 17 | 0 | 9.3  | 0 |
| 0 | 100 | 1 | 22 | 1 | 7.2  | 0 |
| 0 | 88  | 0 | 18 | 0 | 4    | 1 |
| 0 | 80  | 0 | 16 | 0 | 14.1 | 1 |
| 0 | 78  | 0 | 17 | 0 | 4.7  | 0 |
| 0 | 98  | 1 | 26 | 1 | 8.2  | 0 |
| 0 | 87  | 0 | 18 | 0 | 7.6  | 0 |
| 0 | 116 | 1 | 18 | 0 | 9.2  | 0 |
| 0 | 86  | 0 | 16 | 0 | 9.6  | 0 |
| 0 | 85  | 0 | 20 | 1 | 9.3  | 0 |
| 0 | 80  | 0 | 40 | 1 | 17.5 | 1 |
| 0 | 124 | 1 | 24 | 1 | 5.8  | 0 |
| 0 | 125 | 1 | 18 | 0 | 5.8  | 0 |
| 0 | 121 | 1 | 18 | 0 | 8    | 0 |
| 0 | 77  | 0 | 20 | 1 | 6.8  | 0 |
| 0 | 113 | 1 | 18 | 0 | 3.1  | 1 |
| 0 | 89  | 0 | 18 | 0 | 6.6  | 0 |
| 0 | 108 | 1 | 19 | 0 | 6.1  | 0 |
| 1 | 54  | 0 | 18 | 0 | 4.2  | 0 |
| 0 | 96  | 1 | 18 | 0 | 0    | 1 |
| 0 | 71  | 0 | 22 | 1 | 8.5  | 0 |
| 0 | 85  | 0 | 22 | 1 | 10.6 | 0 |
| 0 | 87  | 0 | 20 | 1 | 5.4  | 0 |
| 0 | 77  | 0 | 20 | 1 | 10.6 | 0 |
| 1 | 136 | 1 | 26 | 1 | 9.5  | 0 |
| 0 | 73  | 0 | 22 | 1 | 8.5  | 0 |
| 0 | 79  | 0 | 24 | 1 | 9    | 0 |
| 0 | 60  | 0 | 20 | 1 | 11.9 | 0 |
| 0 | 50  | 0 | 16 | 0 | 9.4  | 0 |

|   |     |   |    |   |      |   |
|---|-----|---|----|---|------|---|
| 0 | 73  | 0 | 18 | 0 | 8.9  | 0 |
| 0 | 123 | 1 | 38 | 1 | 15.8 | 1 |
| 0 | 93  | 1 | 22 | 1 | 5.2  | 0 |
| 1 | 81  | 0 | 32 | 1 | 2    | 1 |
| 0 | 124 | 1 | 16 | 0 | 12.4 | 1 |
| 0 | 72  | 0 | 22 | 1 | 9.5  | 0 |
| 0 | 99  | 1 | 27 | 1 | 7.2  | 0 |
| 0 | 111 | 1 | 24 | 1 | 7.7  | 0 |
| 0 | 98  | 1 | 22 | 1 | 8.3  | 0 |
| 0 | 119 | 1 | 24 | 1 | 14.2 | 1 |
| 0 | 72  | 0 | 20 | 1 | 0    | 1 |
| 0 | 88  | 0 | 18 | 0 | 3.5  | 1 |
| 0 | 123 | 1 | 18 | 0 | 6.8  | 0 |
| 1 | 92  | 1 | 20 | 1 | 0    | 1 |
| 0 | 112 | 1 | 24 | 1 | 6.5  | 0 |
| 0 | 74  | 0 | 25 | 1 | 4.5  | 0 |
| 0 | 69  | 0 | 26 | 1 | 22.6 | 1 |
| 1 | 105 | 1 | 26 | 1 | 8.8  | 0 |
| 0 | 90  | 1 | 25 | 1 | 7.4  | 0 |
| 0 | 82  | 0 | 20 | 1 | 13.5 | 1 |
| 1 | 100 | 1 | 22 | 1 | 7.7  | 0 |
| 1 | 103 | 1 | 18 | 0 | 3.8  | 1 |
| 1 | 75  | 0 | 20 | 1 | 6.6  | 0 |
| 0 | 64  | 0 | 18 | 0 | 5.8  | 0 |
| 1 | 120 | 1 | 20 | 1 | 5.8  | 0 |
| 1 | 112 | 1 | 36 | 1 | 0    | 1 |
| 0 | 109 | 1 | 20 | 1 | 11.5 | 0 |
| 1 | 85  | 0 | 44 | 1 | 11.8 | 0 |
| 0 | 78  | 0 | 28 | 1 | 9    | 0 |
| 0 | 111 | 1 | 30 | 1 | 9.4  | 0 |
| 1 | 87  | 0 | 26 | 1 | 14.7 | 1 |
| 0 | 146 | 1 | 24 | 1 | 5.2  | 0 |
| 0 | 110 | 1 | 24 | 1 | 8.9  | 0 |
| 1 | 80  | 0 | 20 | 1 | 7    | 0 |
| 1 | 120 | 1 | 18 | 0 | 7.4  | 0 |
| 0 | 76  | 0 | 20 | 1 | 9.9  | 0 |
| 0 | 93  | 1 | 20 | 1 | 3.6  | 1 |
| 0 | 90  | 1 | 22 | 1 | 0    | 1 |
| 1 | 132 | 1 | 20 | 1 | 3.6  | 1 |
| 1 | 106 | 1 | 20 | 1 | 6.8  | 0 |
| 0 | 18  | 0 | 18 | 0 | 14.9 | 1 |
| 0 | 80  | 0 | 26 | 1 | 0    | 1 |
| 1 | 106 | 1 | 18 | 0 | 2.9  | 1 |
| 0 | 79  | 0 | 18 | 0 | 6.6  | 0 |
| 1 | 114 | 1 | 22 | 1 | 3.8  | 1 |

|   |     |   |    |   |      |   |
|---|-----|---|----|---|------|---|
| 0 | 97  | 1 | 20 | 1 | 4.3  | 0 |
| 0 | 77  | 0 | 17 | 0 | 3.8  | 1 |
| 0 | 87  | 0 | 18 | 0 | 5.8  | 0 |
| 0 | 107 | 1 | 22 | 1 | 5.9  | 0 |
| 0 | 170 | 1 | 48 | 1 | 19.6 | 1 |
| 0 | 68  | 0 | 18 | 0 | 3.9  | 1 |
| 1 | 72  | 0 | 30 | 1 | 0    | 1 |
| 0 | 103 | 1 | 24 | 1 | 8.3  | 0 |
| 1 | 125 | 1 | 24 | 1 | 7.3  | 0 |
| 0 | 120 | 1 | 20 | 1 | 9.2  | 0 |
| 0 | 122 | 1 | 34 | 1 | 19.3 | 1 |
| 0 | 129 | 1 | 22 | 1 | 8.1  | 0 |
| 0 | 101 | 1 | 22 | 1 | 5    | 0 |
| 0 | 100 | 1 | 18 | 0 | 4.9  | 0 |
| 1 | 92  | 1 | 22 | 1 | 5    | 0 |
| 1 | 107 | 1 | 26 | 1 | 10.2 | 0 |
| 0 | 125 | 1 | 18 | 0 | 0    | 1 |
| 0 | 85  | 0 | 30 | 1 | 11.3 | 0 |
| 0 | 69  | 0 | 20 | 1 | 5    | 0 |
| 1 | 93  | 1 | 20 | 1 | 7.2  | 0 |
| 0 | 91  | 1 | 21 | 1 | 10.3 | 0 |
| 1 | 93  | 1 | 18 | 0 | 6.8  | 0 |
| 0 | 108 | 1 | 22 | 1 | 9.5  | 0 |
| 1 | 100 | 1 | 28 | 1 | 17.1 | 1 |
| 1 | 96  | 1 | 26 | 1 | 9.4  | 0 |
| 1 | 118 | 1 | 22 | 1 | 13.8 | 1 |
| 0 | 92  | 1 | 16 | 0 | 9.6  | 0 |
| 0 | 110 | 1 | 20 | 1 | 11.1 | 0 |
| 0 | 88  | 0 | 20 | 1 | 4.7  | 0 |
| 0 | 125 | 1 | 24 | 1 | 4.7  | 0 |
| 1 | 114 | 1 | 16 | 0 | 0    | 1 |
| 0 | 117 | 1 | 22 | 1 | 5.3  | 0 |
| 0 | 83  | 0 | 32 | 1 | 0    | 1 |
| 1 | 117 | 1 | 24 | 1 | 10.3 | 0 |
| 0 | 94  | 1 | 20 | 1 | 7.8  | 0 |
| 1 | 124 | 1 | 28 | 1 | 14.5 | 1 |
| 0 | 111 | 1 | 24 | 1 | 3.1  | 1 |
| 0 | 50  | 0 | 16 | 0 | 2.1  | 1 |
| 1 | 115 | 1 | 21 | 1 | 4.6  | 0 |
| 0 | 129 | 1 | 20 | 1 | 8.1  | 0 |
| 0 | 130 | 1 | 28 | 1 | 3.6  | 1 |
| 0 | 120 | 1 | 22 | 1 | 7.3  | 0 |
| 0 | 105 | 1 | 22 | 1 | 3.7  | 1 |
| 0 | 101 | 1 | 20 | 1 | 7.7  | 0 |
| 1 | 104 | 1 | 30 | 1 | 8    | 0 |

|   |     |   |    |   |      |   |
|---|-----|---|----|---|------|---|
| 0 | 125 | 1 | 18 | 0 | 4.3  | 0 |
| 0 | 92  | 1 | 18 | 0 | 6    | 0 |
| 0 | 93  | 1 | 22 | 1 | 9.4  | 0 |
| 1 | 107 | 1 | 36 | 1 | 9    | 0 |
| 1 | 126 | 1 | 32 | 1 | 15.8 | 1 |
| 0 | 119 | 1 | 18 | 0 | 18   | 1 |
| 0 | 59  | 0 | 22 | 1 | 5.9  | 0 |
| 0 | 82  | 0 | 16 | 0 | 5.5  | 0 |
| 0 | 134 | 1 | 18 | 0 | 10   | 0 |
| 1 | 102 | 1 | 26 | 1 | 7.2  | 0 |
| 0 | 95  | 1 | 18 | 0 | 3.1  | 1 |
| 0 | 109 | 1 | 18 | 0 | 3.2  | 1 |
| 0 | 74  | 0 | 21 | 1 | 1.5  | 1 |
| 0 | 65  | 0 | 20 | 1 | 14.4 | 1 |
| 0 | 94  | 1 | 20 | 1 | 0    | 1 |
| 0 | 95  | 1 | 24 | 1 | 10.9 | 0 |
| 0 | 81  | 0 | 18 | 0 | 10.1 | 0 |
| 0 | 57  | 0 | 16 | 0 | 3    | 1 |
| 0 | 99  | 1 | 27 | 1 | 3.6  | 1 |
| 0 | 100 | 1 | 20 | 1 | 0    | 1 |
| 0 | 86  | 0 | 20 | 1 | 9.2  | 0 |
| 0 | 112 | 1 | 20 | 1 | 9.6  | 0 |
| 0 | 68  | 0 | 20 | 1 | 6.5  | 0 |
| 1 | 97  | 1 | 30 | 1 | 7.3  | 0 |
| 0 | 92  | 1 | 26 | 1 | 9.3  | 0 |
| 1 | 72  | 0 | 18 | 0 | 10   | 0 |
| 0 | 83  | 0 | 25 | 1 | 11.9 | 0 |
| 0 | 97  | 1 | 28 | 1 | 6.7  | 0 |
| 0 | 104 | 1 | 22 | 1 | 13.3 | 1 |
| 0 | 96  | 1 | 20 | 1 | 6.5  | 0 |
| 0 | 84  | 0 | 20 | 1 | 0    | 1 |
| 1 | 91  | 1 | 24 | 1 | 10.7 | 0 |
| 0 | 59  | 0 | 28 | 1 | 4.1  | 0 |
| 0 | 104 | 1 | 29 | 1 | 12.9 | 1 |
| 0 | 119 | 1 | 18 | 0 | 6.6  | 0 |
| 0 | 94  | 1 | 22 | 1 | 9.1  | 0 |
| 1 | 120 | 1 | 24 | 1 | 6.5  | 0 |
| 1 | 88  | 0 | 34 | 1 | 7.9  | 0 |
| 0 | 66  | 0 | 20 | 1 | 0    | 1 |
| 1 | 87  | 0 | 22 | 1 | 6.2  | 0 |
| 0 | 79  | 0 | 16 | 0 | 3.3  | 1 |
| 1 | 106 | 1 | 18 | 0 | 0    | 1 |
| 0 | 106 | 1 | 28 | 1 | 7.3  | 0 |
| 0 | 76  | 0 | 18 | 0 | 10.2 | 0 |
| 0 | 96  | 1 | 22 | 1 | 6.3  | 0 |

|   |     |   |    |      |      |   |
|---|-----|---|----|------|------|---|
| 1 | 118 | 1 | 30 | 1    | 0    | 1 |
| 0 | 118 | 1 | 34 | 1    | 11.1 | 0 |
| 0 | 117 | 1 | 22 | 1    | 6.5  | 0 |
| 1 | 87  | 0 | 22 | 1    | 6.2  | 0 |
| 0 | 103 | 1 | 16 | 0    | 8.7  | 0 |
| 0 | 87  | 0 | 28 | 1    | 3.5  | 1 |
| 0 | 107 | 1 | 18 | 0    | 4.8  | 0 |
| 0 | 120 | 1 | 20 | 1    | 8.2  | 0 |
| 1 | 87  | 0 | 24 | 1    | 11.2 | 0 |
| 0 | 94  | 1 | 18 | 0    | 8.3  | 0 |
| 0 | 104 | 1 | 35 | 1    | 8.3  | 0 |
| 0 | 64  | 0 | 22 | 1    | 0    | 1 |
| 0 | 56  | 0 | 18 | 0    | 13.1 | 1 |
| 1 | 111 | 1 | 22 | 1    | 8    | 0 |
| 0 | 106 | 1 | 18 | 0    | 9.7  | 0 |
| 0 | 96  | 1 | 34 | 1    | 13   | 1 |
| 0 | 110 | 1 | 30 | 1    | 10.7 | 0 |
| 0 | 123 | 1 | 30 | 1    | 13   | 1 |
| 0 | 80  | 0 | 16 | 0    | 5.5  | 0 |
| 0 | 95  | 1 | 22 | 1    | 0    | 1 |
| 1 | 82  | 0 | 20 | 1    | 5.6  | 0 |
| 0 | 74  | 0 | 18 | 0    | 8.4  | 0 |
| 0 | 122 | 1 | 26 | 1    | 13.7 | 1 |
| 0 | 89  | 0 | 20 | 1    | 6.7  | 0 |
| 0 | 96  | 1 | 20 | 1    | 5.2  | 0 |
| 0 | 95  | 1 | 29 | 1    | 7.7  | 0 |
| 0 | 80  | 0 | 18 | 0    | 7.1  | 0 |
| 0 | 79  | 0 | 19 | 0    | 2.3  | 1 |
| 1 | 100 | 1 | 24 | 1    | 1.7  | 1 |
| 1 | 102 | 1 | 24 | 1    | 0    | 1 |
| 0 | 79  | 0 | 18 | 0    | 3.3  | 1 |
| 1 | 133 | 1 | 16 | 0    | 12.2 | 1 |
| 0 | 55  | 0 | 35 | 1    | 6.9  | 0 |
| 0 | 95  | 1 | 19 | 0    | 3.4  | 1 |
| 1 | 63  | 0 | 17 | 0    | 6.1  | 0 |
| 1 | 72  | 0 | 20 | 1    | 8.5  | 0 |
| 0 | 64  | 0 | 18 | 0 NA | NA   |   |
| 0 | 86  | 0 | 20 | 1    | 4.9  | 0 |
| 1 | 112 | 1 | 18 | 0    | 6.4  | 0 |
| 1 | 120 | 1 | 26 | 1    | 12.4 | 1 |
| 0 | 92  | 1 | 30 | 1    | 7.8  | 0 |
| 1 | 97  | 1 | 18 | 0    | 14.3 | 1 |
| 0 | 80  | 0 | 16 | 0    | 15   | 1 |
| 0 | 98  | 1 | 26 | 1    | 5.7  | 0 |
| 1 | 75  | 0 | 22 | 1    | 15.1 | 1 |

|   |     |   |    |   |      |   |
|---|-----|---|----|---|------|---|
| 0 | 89  | 0 | 20 | 1 | 10.6 | 0 |
| 0 | 120 | 1 | 26 | 1 | 5.1  | 0 |
| 0 | 69  | 0 | 18 | 0 | 9.4  | 0 |
| 1 | 125 | 1 | 18 | 0 | 0    | 1 |
| 0 | 134 | 1 | 24 | 1 | 3.1  | 1 |
| 0 | 77  | 0 | 17 | 0 | 5.9  | 0 |
| 0 | 55  | 0 | 22 | 1 | 3.2  | 1 |
| 0 | 90  | 1 | 19 | 0 | 24.8 | 1 |
| 0 | 79  | 0 | 16 | 0 | 6.2  | 0 |
| 0 | 96  | 1 | 18 | 0 | 7.4  | 0 |
| 0 | 99  | 1 | 24 | 1 | 10.7 | 0 |
| 0 | 96  | 1 | 20 | 1 | 7.1  | 0 |
| 0 | 78  | 0 | 18 | 0 | 5.1  | 0 |
| 0 | 106 | 1 | 22 | 1 | 10.6 | 0 |
| 0 | 76  | 0 | 16 | 0 | 8.1  | 0 |
| 1 | 117 | 1 | 18 | 0 | 5.1  | 0 |
| 0 | 57  | 0 | 20 | 1 | 3    | 1 |
| 1 | 90  | 1 | 18 | 0 | 3.7  | 1 |
| 0 | 105 | 1 | 20 | 1 | 8.9  | 0 |
| 0 | 64  | 0 | 20 | 1 | 4.9  | 0 |
| 0 | 75  | 0 | 20 | 1 | 3.7  | 1 |
| 0 | 101 | 1 | 24 | 1 | 4.9  | 0 |
| 0 | 119 | 1 | 30 | 1 | 14.6 | 1 |
| 1 | 93  | 1 | 22 | 1 | 7.6  | 0 |
| 0 | 74  | 0 | 16 | 0 | 11.5 | 0 |
| 1 | 115 | 1 | 24 | 1 | 12.7 | 1 |
| 1 | 126 | 1 | 44 | 1 | 10   | 0 |
| 0 | 113 | 1 | 22 | 1 | 8.3  | 0 |
| 0 | 68  | 0 | 18 | 0 | 5.7  | 0 |
| 0 | 97  | 1 | 17 | 0 | 8.5  | 0 |
| 1 | 104 | 1 | 22 | 1 | 6    | 0 |
| 0 | 82  | 0 | 28 | 1 | 9.5  | 0 |
| 0 | 58  | 0 | 26 | 1 | 3.9  | 1 |
| 1 | 120 | 1 | 32 | 1 | 20.1 | 1 |
| 0 | 70  | 0 | 22 | 1 | 8.6  | 0 |
| 0 | 79  | 0 | 22 | 1 | 17.6 | 1 |
| 0 | 70  | 0 | 18 | 0 | 2.7  | 1 |
| 0 | 92  | 1 | 26 | 1 | 7.9  | 0 |
| 0 | 104 | 1 | 18 | 0 | 5.5  | 0 |
| 0 | 92  | 1 | 30 | 1 | 11.7 | 0 |
| 1 | 99  | 1 | 18 | 0 | 6.4  | 0 |
| 0 | 81  | 0 | 20 | 1 | 4.3  | 0 |
| 0 | 58  | 0 | 28 | 1 | 5.1  | 0 |
| 0 | 126 | 1 | 32 | 1 | 7.3  | 0 |
| 0 | 86  | 0 | 16 | 0 | 9.1  | 0 |

|   |     |   |    |   |      |   |
|---|-----|---|----|---|------|---|
| 1 | 98  | 1 | 18 | 0 | 5.4  | 0 |
| 0 | 98  | 1 | 24 | 1 | 8.1  | 0 |
| 0 | 79  | 0 | 19 | 0 | 3.2  | 1 |
| 0 | 76  | 0 | 20 | 1 | 6.1  | 0 |
| 0 | 121 | 1 | 14 | 0 | 16.5 | 1 |
| 0 | 120 | 1 | 20 | 1 | 0    | 1 |
| 0 | 117 | 1 | 30 | 1 | 9.9  | 0 |
| 0 | 92  | 1 | 22 | 1 | 17.5 | 1 |
| 0 | 110 | 1 | 20 | 1 | 6.8  | 0 |
| 0 | 118 | 1 | 28 | 1 | 13.9 | 1 |
| 0 | 97  | 1 | 22 | 1 | 8    | 0 |
| 1 | 109 | 1 | 16 | 0 | 6    | 0 |
| 0 | 110 | 1 | 20 | 1 | 7.1  | 0 |
| 0 | 79  | 0 | 22 | 1 | 6.6  | 0 |
| 0 | 89  | 0 | 22 | 1 | 4.6  | 0 |
| 1 | 74  | 0 | 28 | 1 | 12.9 | 1 |
| 0 | 101 | 1 | 24 | 1 | 6.1  | 0 |
| 0 | 85  | 0 | 16 | 0 | 6.6  | 0 |
| 0 | 74  | 0 | 19 | 0 | 4.9  | 0 |
| 0 | 88  | 0 | 20 | 1 | 0    | 1 |
| 0 | 94  | 1 | 18 | 0 | 7.7  | 0 |
| 1 | 112 | 1 | 16 | 0 | 7.3  | 0 |
| 0 | 82  | 0 | 20 | 1 | 5.6  | 0 |
| 0 | 72  | 0 | 22 | 1 | 13.5 | 1 |
| 1 | 70  | 0 | 18 | 0 | 5.4  | 0 |
| 0 | 75  | 0 | 18 | 0 | 0    | 1 |
| 1 | 121 | 1 | 17 | 0 | 13.8 | 1 |
| 1 | 87  | 0 | 40 | 1 | 5.7  | 0 |
| 1 | 109 | 1 | 26 | 1 | 7.6  | 0 |
| 0 | 104 | 1 | 36 | 1 | 9.8  | 0 |
| 0 | 114 | 1 | 20 | 1 | 8.7  | 0 |
| 0 | 84  | 0 | 20 | 1 | 9.4  | 0 |
| 0 | 86  | 0 | 20 | 1 | 6.8  | 0 |
| 0 | 100 | 1 | 24 | 1 | 5.8  | 0 |
| 0 | 125 | 1 | 24 | 1 | 10.4 | 0 |
| 0 | 116 | 1 | 26 | 1 | 2.7  | 1 |
| 0 | 109 | 1 | 20 | 1 | 6.1  | 0 |
| 0 | 95  | 1 | 20 | 1 | 8.7  | 0 |
| 0 | 97  | 1 | 20 | 1 | 4.2  | 0 |
| 1 | 95  | 1 | 32 | 1 | 11.8 | 0 |
| 0 | 104 | 1 | 20 | 1 | 4.5  | 0 |
| 0 | 88  | 0 | 19 | 0 | 7.4  | 0 |
| 0 | 62  | 0 | 16 | 0 | 8.2  | 0 |
| 0 | 103 | 1 | 22 | 1 | 4.7  | 0 |
| 1 | 111 | 1 | 26 | 1 | 4    | 1 |



|   |     |   |    |   |      |   |
|---|-----|---|----|---|------|---|
| 0 | 75  | 0 | 20 | 1 | 10.4 | 0 |
| 0 | 83  | 0 | 22 | 1 | 9.7  | 0 |
| 0 | 60  | 0 | 16 | 0 | 5.8  | 0 |
| 0 | 81  | 0 | 20 | 1 | 9.9  | 0 |
| 0 | 78  | 0 | 26 | 1 | 12.6 | 1 |
| 0 | 84  | 0 | 20 | 1 | 3.6  | 1 |
| 0 | 76  | 0 | 20 | 1 | 0    | 1 |
| 1 | 104 | 1 | 20 | 1 | 12.1 | 1 |
| 0 | 93  | 1 | 22 | 1 | 8.7  | 0 |
| 0 | 79  | 0 | 20 | 1 | 4.5  | 0 |
| 0 | 106 | 1 | 22 | 1 | 0    | 1 |
| 0 | 95  | 1 | 22 | 1 | 5.3  | 0 |
| 0 | 67  | 0 | 22 | 1 | 4.3  | 0 |
| 0 | 93  | 1 | 24 | 1 | 3.1  | 1 |
| 0 | 99  | 1 | 20 | 1 | 7.4  | 0 |
| 0 | 120 | 1 | 18 | 0 | 10.6 | 0 |
| 0 | 74  | 0 | 18 | 0 | 3.5  | 1 |
| 0 | 73  | 0 | 18 | 0 | 23.4 | 1 |
| 0 | 90  | 1 | 18 | 0 | 5.7  | 0 |
| 0 | 129 | 1 | 20 | 1 | 14.2 | 1 |
| 0 | 125 | 1 | 20 | 1 | 7.6  | 0 |
| 0 | 96  | 1 | 16 | 0 | 13.7 | 1 |
| 0 | 76  | 0 | 20 | 1 | 12.6 | 1 |
| 0 | 124 | 1 | 20 | 1 | 16.9 | 1 |
| 0 | 62  | 0 | 20 | 1 | 6.1  | 0 |
| 1 | 75  | 0 | 22 | 1 | 6.2  | 0 |
| 0 | 83  | 0 | 18 | 0 | 9.1  | 0 |
| 1 | 102 | 1 | 22 | 1 | 6.8  | 0 |
| 0 | 101 | 1 | 21 | 1 | 10.8 | 0 |
| 0 | 87  | 0 | 32 | 1 | 7.2  | 0 |
| 0 | 69  | 0 | 20 | 1 | 17   | 1 |
| 0 | 91  | 1 | 16 | 0 | 9.4  | 0 |
| 0 | 114 | 1 | 24 | 1 | 10.8 | 0 |
| 0 | 75  | 0 | 24 | 1 | 9.2  | 0 |
| 0 | 86  | 0 | 22 | 1 | 6.1  | 0 |
| 0 | 95  | 1 | 18 | 0 | 7.3  | 0 |
| 0 | 73  | 0 | 22 | 1 | 10.3 | 0 |
| 0 | 92  | 1 | 22 | 1 | 4.8  | 0 |
| 0 | 112 | 1 | 18 | 0 | 3.2  | 1 |
| 1 | 127 | 1 | 24 | 1 | 9.8  | 0 |
| 0 | 96  | 1 | 22 | 1 | 7.8  | 0 |
| 0 | 71  | 0 | 20 | 1 | 5.1  | 0 |
| 0 | 86  | 0 | 20 | 1 | 9.2  | 0 |
| 0 | 93  | 1 | 19 | 0 | 9.4  | 0 |
| 0 | 84  | 0 | 18 | 0 | 9.6  | 0 |

|   |    |   |    |   |      |   |
|---|----|---|----|---|------|---|
| 0 | 79 | 0 | 30 | 1 | 8.5  | 0 |
| 1 | 72 | 0 | 16 | 0 | 5.2  | 0 |
| 0 | 53 | 0 | 20 | 1 | 5.9  | 0 |
| 0 | 97 | 1 | 24 | 1 | 14.2 | 1 |
| 0 | 92 | 1 | 24 | 1 | 3.9  | 1 |
| 1 | 99 | 1 | 18 | 0 | 2.8  | 1 |
| 0 | 74 | 0 | 18 | 0 | 13   | 1 |

|   |      |   |   |                 |       |
|---|------|---|---|-----------------|-------|
| 2 | 6.6  | 0 | 2 | 91 Room Air     | 100   |
| 2 | 6.9  | 0 | 2 | 99 Room Air     | 99.4  |
| 1 | 4.1  | 0 | 1 | 98 Room Air     | 100.3 |
| 2 | 11   | 0 | 1 | 99 Room Air     | 102.2 |
| 2 | 6.2  | 0 | 2 | 99 Nasal Cannul | 100.9 |
| 0 | 8    | 0 | 0 | 94 Room Air     | 103.1 |
| 2 | 4.4  | 0 | 2 | 91 Room Air     | 100.6 |
| 1 | 3.5  | 1 | 1 | 99 Nasal Cannul | 100.9 |
| 3 | 10.8 | 0 | 3 | 93 Room Air     | 102.5 |
| 3 | 3.8  | 1 | 3 | 93 Room Air     | 100.8 |
| 3 | 9.2  | 0 | 3 | 98 Room Air     | 101   |
| 2 | 9.5  | 0 | 2 | 75 Room Air     | 99.9  |
| 2 | 5.2  | 0 | 2 | 98 Nasal Cannul | 101.6 |
| 3 | 7.6  | 0 | 3 | 97 Room Air     | 102.4 |
| 2 | 10.2 | 0 | 2 | 96 Room Air     | 102.4 |
| 1 | 7.2  | 0 | 1 | 93 Room Air     | 98.9  |
| 2 | 10.1 | 0 | 2 | 97 Room Air     | 103.8 |
| 2 | 9.2  | 0 | 2 | 97 Room Air     | 103.1 |
| 3 | 5.5  | 0 | 3 | 98 Room Air     | 101.3 |
| 2 | 9.8  | 0 | 1 | 82 Non-Rebreat  | 100.1 |
| 1 | 4.9  | 0 | 1 | 90 Ambu-Bag     | 101   |
| 1 | 4.3  | 0 | 1 | 97 Room Air     | 102.8 |
| 2 | 8.7  | 0 | 2 | 88 Room Air     | 100.9 |
| 0 | 5.7  | 0 | 0 | 95 Room Air     | 102.6 |
| 1 | 13.9 | 1 | 2 | 100 Room Air    | 100.4 |
| 2 | 7.6  | 0 | 2 | 97 Room Air     | 101.7 |
| 4 | 15.7 | 1 | 4 | 99 Ventilator   | 102.4 |
| 2 | 9.6  | 0 | 2 | 94 Nasal Cannul | 102.9 |
| 2 | 3.4  | 1 | 2 | 98 Non-Rebreat  | 104   |
| 1 | 12.9 | 1 | 1 | 97 Room Air     | 98.8  |
| 3 | 10.7 | 0 | 3 | 92 Room Air     | 103.1 |
| 1 | 8.6  | 0 | 1 | 96 Room Air     | 98.3  |
| 3 | 10.3 | 0 | 3 | 98 Non-Rebreat  | 103.2 |
| 2 | 5.6  | 0 | 2 | 92 Room Air     | 102.2 |
| 1 | 6.5  | 0 | 1 | 91 Room Air     | 103   |
| 3 | 25.1 | 1 | 3 | 93 Nasal Cannul | 101.9 |
| 2 | 8.8  | 0 | 2 | 92 Room Air     | 103.2 |
| 2 | 8.4  | 0 | 2 | 89 Room Air     | 98.8  |
| 3 | 7    | 0 | 3 | 94 Nasal Cannul | 103.5 |
| 1 | 5.3  | 0 | 1 | 91 Room Air     | 101.9 |
| 1 | 4.5  | 0 | 1 | 91 Nasal Cannul | 98.7  |
| 1 | 16.1 | 1 | 2 | 98 Room Air     | 98.3  |
| 1 | 7.4  | 0 | 1 | 94 Nasal Cannul | 101.4 |
| 3 | 6.8  | 0 | 2 | 98 Nasal Cannul | 103.2 |
| 2 | 7.1  | 0 | 2 | 89 Room Air     | 100   |

|   |      |   |   |                  |       |
|---|------|---|---|------------------|-------|
| 0 | 5.2  | 0 | 0 | 98 Room Air      | 98.8  |
| 3 | 11.9 | 0 | 2 | 95 Nasal Cannul  | 98.4  |
| 2 | 2.2  | 1 | 2 | 98 Room Air      | 100.3 |
| 4 | 5.4  | 0 | 3 | 96 Room Air      | 105.5 |
| 3 | 10   | 0 | 3 | 95 Room Air      | 102.7 |
| 1 | 5.4  | 0 | 1 | 98 Room Air      | 98.1  |
| 2 | 18.7 | 1 | 3 | 96 Room Air      | 102.3 |
| 2 | 9.8  | 0 | 2 | 99 Non-Rebreat   | 101.2 |
| 1 | 8.4  | 0 | 1 | 89 Room Air      | 101.9 |
| 2 | 9.9  | 0 | 2 | 100 Room Air     | 99.2  |
| 2 | 6.1  | 0 | 2 | 91 Room Air      | 103   |
| 3 | 10.2 | 0 | 2 | 99 Non-Rebreat   | 98.9  |
| 2 | 8.5  | 0 | 2 | 91 Room Air      | 104.2 |
| 1 | 6.7  | 0 | 0 | 96 Room Air      | 99.3  |
| 2 | 9    | 0 | 2 | 95 Room Air      | 103.4 |
| 1 | 5.5  | 0 | 1 | 86 Nasal Cannul  | 102.9 |
| 0 | 7.4  | 0 | 0 | 86 Room Air      | 102.5 |
| 1 | 4.5  | 0 | 1 | 90 Non-Rebreat   | 99.7  |
| 2 | 15.8 | 1 | 2 | 99 Room Air      | 99.3  |
| 1 | 5.5  | 0 | 1 | 87 Room Air      | 101.8 |
| 2 | 9.8  | 0 | 2 | 84 Room Air      | 100.6 |
| 2 | 3.9  | 1 | 3 | 97 Nasal Cannul  | 101.8 |
| 1 | 11.8 | 0 | 1 | 82 Nasal Cannul  | 102   |
| 2 | 11.6 | 0 | 2 | 96 Room Air      | 102.2 |
| 2 | 11   | 0 | 2 | 96 Room Air      | 101.7 |
| 0 | 5.3  | 0 | 0 | 95 Room Air      | 102.9 |
| 1 | 3.1  | 1 | 1 | 94 Room Air      | 104   |
| 3 | 19.1 | 1 | 3 | 92 Room Air      | 99.7  |
| 2 | 7.3  | 0 | 2 | 97 Nasal Cannul  | 99    |
| 2 | 10.5 | 0 | 2 | 98 Ventilator    | 100.5 |
| 0 | 14.9 | 1 | 1 | 95 Room Air      | 98.9  |
| 1 | 13.2 | 1 | 2 | 98 Room Air      | 99.1  |
| 3 | 10.8 | 0 | 3 | 94 Nasal Cannul  | 101.5 |
| 2 | 0.2  | 1 | 2 | 98 Room Air      | 105.6 |
| 0 | 8.1  | 0 | 0 | 98 Room Air      | 99.8  |
| 1 | 22.6 | 1 | 1 | 100 Nasal Cannul | 100.6 |
| 3 | 18.7 | 1 | 3 | 79 Non-Rebreat   | 101.3 |
| 4 | 9.5  | 0 | 3 | 97 Room Air      | 103.5 |
| 1 | 4.4  | 0 | 0 | 97 Room Air      | 103.9 |
| 1 | 12.3 | 1 | 2 | 98 Room Air      | 99.1  |
| 2 | 12.4 | 1 | 3 | 92 Room Air      | 99.6  |
| 0 | 5.5  | 0 | 0 | 94 Room Air      | 98.2  |
| 1 | 8.3  | 0 | 1 | 98 Nasal Cannul  | 100   |
| 0 | 4.3  | 0 | 0 | 91 Nasal Cannul  | 101.5 |
| 3 | 3.3  | 1 | 3 | 98 Nasal Cannul  | 104.4 |

|    |    |      |    |   |                  |       |
|----|----|------|----|---|------------------|-------|
|    | 2  | 10.8 | 0  | 2 | 95 Room Air      | 101.7 |
|    | 3  | 17   | 1  | 3 | 94 Room Air      | 103   |
|    | 2  | 6.8  | 0  | 2 | 98 Room Air      | 102.3 |
|    | 2  | 2.3  | 1  | 2 | 93 Room Air      | 99    |
|    | 0  | 9.5  | 0  | 0 | 95 Room Air      | 102.7 |
|    | 2  | 5.1  | 0  | 1 | 95 Room Air      | 101.1 |
| NA | NA | NA   | NA |   | 94 Room Air      | 101.4 |
|    | 1  | 15.7 | 1  | 1 | 100 Room Air     | 99.9  |
|    | 3  | 3.7  | 1  | 4 | 95 Room Air      | 101.1 |
|    | 2  | 5.3  | 0  | 2 | 95 Nasal Cannul  | 103   |
|    | 1  | 5.3  | 0  | 1 | 98 Room Air      | 99.4  |
|    | 1  | 7.3  | 0  | 1 | 100 Nasal Cannul | 99.1  |
|    | 1  | 6.8  | 0  | 1 | 94 Room Air      | 102.9 |
|    | 2  | 2.4  | 1  | 2 | 94 Room Air      | 101.4 |
|    | 1  | 6.7  | 0  | 1 | 98 Room Air      | 100.9 |
|    | 1  | 11.1 | 0  | 1 | 100 Room Air     | 100.9 |
|    | 0  | 6.2  | 0  | 0 | 89 Room Air      | 99.3  |
|    | 0  | 8.8  | 0  | 0 | 98 Room Air      | 98.8  |
|    | 3  | 19.9 | 1  | 3 | 87 Non-Rebreat   | 102.7 |
|    | 1  | 6    | 0  | 1 | 95 Nasal Cannul  | 99.1  |
|    | 3  | 8.3  | 0  | 2 | 99 Room Air      | 99.2  |
|    | 0  | 6.3  | 0  | 0 | 99 Room Air      | 99.3  |
|    | 1  | 10.2 | 0  | 1 | 98 Nasal Cannul  | 104.4 |
|    | 2  | 8.5  | 0  | 2 | 99 Nasal Cannul  | 99.5  |
|    | 0  | 8.9  | 0  | 0 | 99 Room Air      | 101.4 |
|    | 0  | 11.3 | 0  | 0 | 98 Room Air      | 99.7  |
|    | 3  | 12.9 | 1  | 3 | 74 Room Air      | 101.9 |
|    | 2  | 5.5  | 0  | 2 | 93 Room Air      | 101.3 |
|    | 2  | 6    | 0  | 2 | 88 Room Air      | 99.9  |
|    | 1  | 5.7  | 0  | 1 | 65 Room Air      | 101.9 |
|    | 1  | 6.7  | 0  | 1 | 89 Room Air      | 100.9 |
|    | 1  | 6.2  | 0  | 1 | 75 Room Air      | 102.6 |
|    | 2  | 11   | 0  | 2 | 97 Room Air      | 102.8 |
|    | 2  | 4.3  | 0  | 2 | 95 Room Air      | 102.8 |
|    | 1  | 21   | 1  | 1 | 99 Room Air      | 99.1  |
|    | 2  | 5.9  | 0  | 2 | 97 Room Air      | 101.1 |
|    | 1  | 14   | 1  | 2 | 98 Room Air      | 103   |
|    | 2  | 9.4  | 0  | 1 | 97 Room Air      | 98.1  |
|    | 2  | 6.4  | 0  | 2 | 98 Ventilator    | 102.5 |
|    | 1  | 5.7  | 0  | 1 | 93 Room Air      | 102.9 |
|    | 0  | 8.2  | 0  | 0 | 90 Nasal Cannul  | 101.8 |
|    | 2  | 10.4 | 0  | 1 | 97 Nasal Cannul  | 99.5  |
|    | 2  | 6.1  | 0  | 2 | 96 Room Air      | 101.2 |
|    | 3  | 10.7 | 0  | 2 | 98 Room Air      | 100.5 |
|    | 2  | 12.4 | 1  | 3 | 100 Nasal Cannul | 103   |

|      |      |   |   |                 |       |
|------|------|---|---|-----------------|-------|
| 2    | 8.2  | 0 | 2 | 93 Room Air     | 98.9  |
| 1    | 8.3  | 0 | 1 | 96 Room Air     | 99.8  |
| 3    | 12.6 | 1 | 4 | 91 Room Air     | 101.2 |
| 2    | 6.7  | 0 | 2 | 92 Room Air     | 102.8 |
| 1    | 5.4  | 0 | 1 | 96 Room Air     | 100.3 |
| 2    | 6.5  | 0 | 2 | 87 Room Air     | 101.7 |
| 3 NA |      | 1 | 3 | 85 Nasal Cannul | 100   |
| 2    | 6.3  | 0 | 2 | 96 Non-Rebreat  | 100.7 |
| 0    | 8    | 0 | 0 | 93 Room Air     | 100.4 |
| 4    | 3.6  | 1 | 4 | 100 Room Air    | 101.4 |
| 1    | 13   | 1 | 2 | 95 Room Air     | 98.8  |
| 2    | 6.5  | 0 | 2 | 98 Nasal Cannul | 99.4  |
| 1    | 5.5  | 0 | 1 | 96 Nasal Cannul | 99.1  |
| 1    | 6.9  | 0 | 1 | 91 Room Air     | 103   |
| 2    | 4.4  | 0 | 2 | 92 Room Air     | 102.9 |
| 1    | 7.8  | 0 | 1 | 96 Nasal Cannul | 103   |
| 3    | 7.2  | 0 | 3 | 94 Room Air     | 102.8 |
| 2    | 7.8  | 0 | 2 | 97 Room Air     | 103   |
| 4    | 18.9 | 1 | 4 | 94 Room Air     | 103   |
| 1    | 6    | 0 | 1 | 99 Nasal Cannul | 100.6 |
| 2    | 6.4  | 0 | 2 | 80 Room Air     | 99.8  |
| 2    | 6.1  | 0 | 2 | 86 Room Air     | 99.2  |
| 0    | 6.8  | 0 | 0 | 100 Room Air    | 99    |
| 2    | 3.5  | 1 | 2 | 95 Nasal Cannul | 100.5 |
| 1    | 5.8  | 0 | 1 | 83 Room Air     | 102.8 |
| 1    | 5.1  | 0 | 0 | 100 Room Air    | 99.9  |
| 4    | 9.4  | 0 | 3 | 100 Non-Rebreat | 104.4 |
| 2    | 5.7  | 0 | 1 | 97 Nasal Cannul | 99.6  |
| 3    | 22   | 1 | 3 | 97 Room Air     | 99.2  |
| 3    | 15   | 1 | 3 | 78 Room Air     | 98.5  |
| 0    | 7.4  | 0 | 0 | 100 Room Air    | 98.7  |
| 0    | 15.1 | 1 | 1 | 98 Room Air     | 98.5  |
| 1    | 5.3  | 0 | 1 | 96 NA           | 98.9  |
| 2    | 8.5  | 0 | 2 | 88 Room Air     | 101   |
| 2    | 4.9  | 0 | 2 | 89 Nasal Cannul | 103.1 |
| 4    | 2.3  | 1 | 4 | 98 Nasal Cannul | 102.5 |
| 3    | 11.8 | 0 | 2 | 96 Non-Rebreat  | 99    |
| 1    | 5.2  | 0 | 1 | 92 Room Air     | 102.9 |
| 3    | 1.8  | 1 | 3 | 97 Nasal Cannul | 99.4  |
| 3    | 1.8  | 1 | 3 | 95 Room Air     | 99.6  |
| 1    | 7.7  | 0 | 1 | 96 Room Air     | 101.7 |
| 3    | 5.4  | 0 | 2 | 97 Room Air     | 99.7  |
| 2    | 6.9  | 0 | 2 | 93 Room Air     | 101.5 |
| 2    | 7.1  | 0 | 2 | 91 Nasal Cannul | 100.5 |
| 3    | 10.5 | 0 | 3 | 74 Room Air     | 103   |

|      |      |   |   |                 |       |
|------|------|---|---|-----------------|-------|
| 3    | 8.6  | 0 | 2 | 94 Room Air     | 99.7  |
| 3    | 8.6  | 0 | 2 | 98 Nasal Cannul | 99    |
| 2    | 8.4  | 0 | 1 | 98 Room Air     | 99    |
| 1 NA |      | 1 | 1 | 98 Room Air     | 98    |
| 2    | 7.3  | 0 | 1 | 100 Room Air    | 98.7  |
| 3    | 17.5 | 1 | 3 | 91 Room Air     | 99.5  |
| 2    | 7    | 0 | 2 | 92 Room Air     | 105.4 |
| 1    | 5.4  | 0 | 1 | 92 Room Air     | 98.6  |
| 1    | 11.2 | 0 | 1 | 93 Nasal Cannul | 98.7  |
| 1    | 9.4  | 0 | 1 | 88 Non-Rebreat  | 102.7 |
| 1    | 4.5  | 0 | 1 | 97 Non-Rebreat  | 103.4 |
| 3    | 9.4  | 0 | 3 | 93 Non-Rebreat  | 103.5 |
| 1    | 8.1  | 0 | 1 | 95 Room Air     | 100.5 |
| 3    | 11.1 | 0 | 2 | 87 Nasal Cannul | 103.1 |
| 1    | 10   | 0 | 1 | 98 Room Air     | 98.9  |
| 2    | 7.2  | 0 | 2 | 97 Room Air     | 100.6 |
| 2    | 7.8  | 0 | 2 | 100 Non-Rebreat | 103.6 |
| 2    | 8.2  | 0 | 2 | 95 Room Air     | 103.1 |
| 1    | 7.2  | 0 | 0 | 95 Room Air     | 99.2  |
| 3    | 14.7 | 1 | 3 | 86 Room Air     | 101.8 |
| 1    | 6.1  | 0 | 1 | 96 Nasal Cannul | 100.1 |
| 3    | 9.9  | 0 | 2 | 90 Room Air     | 102.9 |
| 3    | 18.5 | 1 | 3 | 91 Ventilator   | 101.1 |
| 2    | 4.9  | 0 | 1 | 99 Nasal Cannul | 99    |
| 1    | 3.8  | 1 | 2 | 86 Room Air     | 98.9  |
| 2    | 7.4  | 0 | 2 | 94 Nasal Cannul | 103.1 |
| 3    | 10.3 | 0 | 3 | 89 Room Air     | 103.3 |
| 3    | 4    | 1 | 4 | 98 Room Air     | 101.7 |
| 3    | 7.7  | 0 | 3 | 95 Nasal Cannul | 102.4 |
| 2    | 6.5  | 0 | 2 | 91 Room Air     | 105.3 |
| 3    | 12.5 | 1 | 3 | 91 Nasal Cannul | 99.1  |
| 0    | 6.9  | 0 | 0 | 100 Room Air    | 99.1  |
| 2    | 6.1  | 0 | 2 | 91 Room Air     | 102   |
| 0    | 6    | 0 | 0 | 100 Room Air    | 98.8  |
| 1    | 12.2 | 1 | 2 | 90 Room Air     | 103   |
| 1    | 3.7  | 1 | 2 | 94 Room Air     | 98.9  |
| 1    | 6    | 0 | 1 | 97 Room Air     | 99.4  |
| 2    | 15.8 | 1 | 3 | 96 Room Air     | 102.2 |
| 2    | 7.8  | 0 | 2 | 98 Nasal Cannul | 98.7  |
| 2    | 3.7  | 1 | 2 | 98 Room Air     | 101.4 |
| 3    | 9.4  | 0 | 2 | 98 Room Air     | 101.2 |
| 3    | 14.7 | 1 | 3 | 82 Non-Rebreat  | 104.3 |
| 1    | 6.9  | 0 | 1 | 93 Room Air     | 103.6 |
| 2    | 7.6  | 0 | 2 | 94 Room Air     | 102.7 |
| 0    | 9.5  | 0 | 0 | 97 Room Air     | 100.3 |

|      |      |   |   |                  |       |
|------|------|---|---|------------------|-------|
| 4    | 22.6 | 1 | 4 | 70 Ventilator    | 100.5 |
| 3    | 3.6  | 1 | 3 | 95 Room Air      | 101.4 |
| 4    | 7.7  | 0 | 3 | 82 Room Air      | 102.9 |
| 2    | 11   | 0 | 2 | 86 Nasal Cannul  | 102.5 |
| 2    | 7.6  | 0 | 2 | 95 Room Air      | 102.1 |
| 3    | 12.6 | 1 | 3 | 99 Non-Rebreat   | 101.5 |
| 2    | 8.1  | 0 | 2 | 89 Non-Rebreat   | 98.7  |
| 2    | 6.3  | 0 | 2 | 91 Room Air      | 103.1 |
| 3    | 9.9  | 0 | 3 | 98 Room Air      | 102.5 |
| 3    | 12.2 | 1 | 4 | 94 Nasal Cannul  | 101.8 |
| 3 NA |      | 1 | 3 | 100 Non-Rebreat  | 98.1  |
| 3    | 7.7  | 0 | 3 | 94 Room Air      | 105.1 |
| 3    | 8.7  | 0 | 3 | 94 Room Air      | 101   |
| 2    | 4.6  | 0 | 2 | 93 Room Air      | 98.9  |
| 3    | 2.9  | 1 | 3 | 96 Room Air      | 104.9 |
| 0    | 7.6  | 0 | 0 | 98 Room Air      | 100.6 |
| 3    | 5.3  | 0 | 3 | 93 Room Air      | 104.2 |
| 3    | 11   | 0 | 2 | 98 Nasal Cannul  | 102.1 |
| 2    | 5.5  | 0 | 2 | 93 Room Air      | 104   |
| 3    | 13.4 | 1 | 3 | 90 Non-Rebreat   | 103.3 |
| 3    | 3.9  | 1 | 3 | 91 Room Air      | 103.1 |
| 0    | 6    | 0 | 0 | 100 Nasal Cannul | 102.8 |
| 1    | 9.2  | 0 | 1 | 100 Room Air     | 100.7 |
| 2    | 8.2  | 0 | 2 | 100 Nasal Cannul | 99.4  |
| 1    | 6.4  | 0 | 1 | 97 Room Air      | 101.9 |
| 0    | 6.5  | 0 | 0 | 98 Room Air      | 98.4  |
| 2    | 2.5  | 1 | 2 | 98 Room Air      | 99.4  |
| 1    | 10.8 | 0 | 1 | 99 Non-Rebreat   | 102.3 |
| 2    | 4.4  | 0 | 1 | 95 Room Air      | 102.9 |
| 1    | 6    | 0 | 0 | 100 Room Air     | 98.2  |
| 2    | 6.5  | 0 | 2 | 89 Room Air      | 100.7 |
| 3    | 17.4 | 1 | 4 | 72 Non-Rebreat   | 102.3 |
| 1    | 17.1 | 1 | 2 | 93 Non-Rebreat   | 99.4  |
| 0    | 6.8  | 0 | 0 | 96 Room Air      | 99    |
| 3    | 5.5  | 0 | 2 | 96 Room Air      | 99.4  |
| 1    | 10.4 | 0 | 1 | 94 Room Air      | 98.8  |
| 1    | 8.8  | 0 | 1 | 99 Room Air      | 99.9  |
| 2    | 13.3 | 1 | 2 | 96 Nasal Cannul  | 98.7  |
| 3    | 15.9 | 1 | 3 | 92 Ventilator    | 101.5 |
| 1    | 6    | 0 | 1 | 97 Room Air      | 101.4 |
| 2    | 6    | 0 | 2 | 88 Room Air      | 98.9  |
| 3    | 4.6  | 0 | 3 | 96 Room Air      | 103.5 |
| 1    | 6    | 0 | 1 | 97 Room Air      | 101.1 |
| 3    | 7.1  | 0 | 3 | 93 Room Air      | 103.4 |
| 0    | 4.2  | 0 | 0 | 94 Room Air      | 102.6 |



|      |      |   |   |                 |       |
|------|------|---|---|-----------------|-------|
| 3    | 7    | 0 | 2 | 100 Room Air    | 101.4 |
| 1    | 4.1  | 0 | 1 | 93 Room Air     | 102.3 |
| 1    | 5.9  | 0 | 1 | 96 Room Air     | 103.1 |
| 3    | 5    | 0 | 2 | 81 Room Air     | 99    |
| 2    | 8.1  | 0 | 2 | 98 Nasal Cannul | 102.7 |
| 1    | 8.4  | 0 | 1 | 91 Non-Rebreat  | 98.4  |
| 3    | 8.1  | 0 | 3 | 91 Room Air     | 102.3 |
| 3    | 6.1  | 0 | 3 | 94 Room Air     | 102.9 |
| 2    | 5.3  | 0 | 2 | 96 Room Air     | 100.9 |
| 2    | 9.8  | 0 | 2 | 95 Room Air     | 99.5  |
| 2    | 9.1  | 0 | 2 | 98 Room Air     | 98.6  |
| 2    | 10.7 | 0 | 2 | 89 Room Air     | 101.7 |
| 2    | 10.2 | 0 | 2 | 72 Nasal Cannul | 102.7 |
| 2    | 7.4  | 0 | 1 | 96 Room Air     | 101.3 |
| 1    | 6.3  | 0 | 1 | 100 Room Air    | 98.6  |
| 1    | 9.4  | 0 | 1 | 96 Room Air     | 102.7 |
| 4    | 4.3  | 0 | 3 | 98 Room Air     | 103.1 |
| 1    | 8.8  | 0 | 1 | 76 Room Air     | 104.5 |
| 1    | 12   | 1 | 2 | 98 Room Air     | 99.9  |
| 3    | 12.2 | 1 | 4 | 98 Non-Rebreat  | 105.5 |
| 3    | 4    | 1 | 3 | 85 Room Air     | 99    |
| 3    | 7.7  | 0 | 3 | 92 Room Air     | 103   |
| 3    | 10.5 | 0 | 3 | 90 Room Air     | 102.5 |
| 1    | 7.5  | 0 | 1 | 97 Room Air     | 98.8  |
| 1    | 6.1  | 0 | 0 | 100 Room Air    | 98.4  |
| 2    | 10.7 | 0 | 1 | 86 Non-Rebreat  | 99.1  |
| 2    | 8    | 0 | 2 | 93 Room Air     | 102.9 |
| 2    | 3.4  | 1 | 2 | 95 Room Air     | 102.6 |
| 2    | 3.7  | 1 | 3 | 93 Room Air     | 100.8 |
| 2    | 14.9 | 1 | 2 | 88 Nasal Cannul | 99.8  |
| 2    | 9.7  | 0 | 2 | 91 Nasal Cannul | 102.6 |
| 3    | 10.6 | 0 | 3 | 96 Non-Rebreat  | 103.3 |
| 3    | 5.9  | 0 | 3 | 93 Room Air     | 101.2 |
| 1    | 7    | 0 | 1 | 96 Room Air     | 99.4  |
| 2    | 10.7 | 0 | 2 | 95 Room Air     | 99.4  |
| 0    | 6.1  | 0 | 0 | 95 Nasal Cannul | 101.5 |
| 2    | 3.5  | 1 | 2 | 96 Room Air     | 102.7 |
| 2    | 10.4 | 0 | 2 | 93 Room Air     | 103.5 |
| 3    | 6.6  | 0 | 3 | 92 Room Air     | 105   |
| 1    | 11.2 | 0 | 1 | 95 Nasal Cannul | 100.7 |
| 2    | 7.8  | 0 | 2 | 84 Room Air     | 100.1 |
| 1    | 8.3  | 0 | 1 | 92 Non-Rebreat  | 100.5 |
| 1    | 8    | 0 | 1 | 96 Room Air     | 100.5 |
| 1 NA |      | 1 | 1 | 100 Room Air    | 98.9  |
| 2    | 12.3 | 1 | 3 | 100 Non-Rebreat | 98.4  |

|   |      |   |   |                 |       |
|---|------|---|---|-----------------|-------|
| 3 | 8.6  | 0 | 3 | 87 Room Air     | 102.6 |
| 3 | 4.6  | 0 | 3 | 97 Nasal Cannul | 103.8 |
| 0 | 7.1  | 0 | 0 | 97 NA           | 100.4 |
| 3 | 7.9  | 0 | 3 | 99 Non-Rebreat  | 100.5 |
| 1 | 3.8  | 1 | 1 | 97 Room Air     | 101.5 |
| 1 | 7.2  | 0 | 1 | 96 Room Air     | 100.1 |
| 1 | 6.1  | 0 | 1 | 94 Room Air     | 98.9  |
| 2 | 7.6  | 0 | 2 | 92 Nasal Cannul | 99.9  |
| 2 | 7.2  | 0 | 2 | 96 Room Air     | 103.5 |
| 2 | 7.7  | 0 | 2 | 87 Room Air     | 99.9  |
| 1 | 6.6  | 0 | 1 | 97 Room Air     | 103.2 |
| 3 | 6    | 0 | 2 | 92 Nasal Cannul | 99.5  |
| 2 | 9.3  | 0 | 2 | 95 NA           | 101.5 |
| 1 | 2.5  | 1 | 1 | 95 Room Air     | 102.9 |
| 0 | 4.5  | 0 | 0 | 95 Room Air     | 102.2 |
| 1 | 9.6  | 0 | 1 | 95 Room Air     | 98.3  |
| 1 | 7.8  | 0 | 1 | 96 Nasal Cannul | 99.5  |
| 0 | 7.8  | 0 | 0 | 97 Room Air     | 99.4  |
| 1 | 17.3 | 1 | 2 | 98 Room Air     | 99.6  |
| 2 | 5.5  | 0 | 2 | 83 Room Air     | 98.7  |
| 1 | 12.5 | 1 | 1 | 95 Nasal Cannul | 100   |
| 2 | 11.5 | 0 | 1 | 97 Nasal Cannul | 100.7 |
| 1 | 7.3  | 0 | 1 | 95 Non-Rebreat  | 99.3  |
| 2 | 7.5  | 0 | 2 | 84 Room Air     | 99    |
| 3 | 11.1 | 0 | 2 | 88 Room Air     | 100.2 |
| 1 | 6.5  | 0 | 1 | 100 Room Air    | 98.5  |
| 2 | 4.1  | 0 | 1 | 93 Room Air     | 101.5 |
| 2 | 13.2 | 1 | 3 | 99 Room Air     | 101.9 |
| 4 | 17.2 | 1 | 4 | 96 Non-Rebreat  | 104.2 |
| 3 | 13.3 | 1 | 3 | 94 Non-Rebreat  | 102.3 |
| 3 | 14.1 | 1 | 3 | 93 Room Air     | 103.1 |
| 2 | 10.5 | 0 | 2 | 95 Nasal Cannul | 101.9 |
| 4 | 3    | 1 | 4 | 91 Room Air     | 101.1 |
| 0 | 10.3 | 0 | 0 | 99 Room Air     | 98.8  |
| 2 | 14.8 | 1 | 2 | 99 Nasal Cannul | 100.5 |
| 1 | 11.5 | 0 | 1 | 84 Room Air     | 99.3  |
| 1 | 9.8  | 0 | 1 | 85 Room Air     | 102.4 |
| 3 | 12.9 | 1 | 3 | 93 Nasal Cannul | 102.4 |
| 3 | 17.7 | 1 | 3 | 81 Non-Rebreat  | 101.1 |
| 0 | 5.4  | 0 | 0 | 90 Room Air     | 98.7  |
| 2 | 5.9  | 0 | 2 | 97 Room Air     | 102.8 |
| 1 | 9.7  | 0 | 1 | 96 Room Air     | 98.6  |
| 2 | 5.1  | 0 | 2 | 90 Room Air     | 102.7 |
| 2 | 9.8  | 0 | 2 | 100 Ventilator  | 101.8 |
| 3 | 21.1 | 1 | 3 | 96 Room Air     | 99.5  |

|      |      |   |   |                 |       |
|------|------|---|---|-----------------|-------|
| 1    | 6.1  | 0 | 1 | 86 Room Air     | 100.1 |
| 4    | 13.4 | 1 | 4 | 86 Room Air     | 103.7 |
| 1    | 8.2  | 0 | 1 | 95 Room Air     | 98.9  |
| 2    | 4.9  | 0 | 1 | 94 Nasal Cannul | 106   |
| 3    | 21.1 | 1 | 3 | 92 Room Air     | 102   |
| 2    | 6.3  | 0 | 2 | 85 Room Air     | 98.9  |
| 2    | 10.3 | 0 | 2 | 87 Non-Rebreat  | 98.9  |
| 1    | 9.8  | 0 | 1 | 97 Ventilator   | 100.8 |
| 2    | 5.2  | 0 | 2 | 90 Room Air     | 102.5 |
| 2    | 8.5  | 0 | 2 | 92 Non-Rebreat  | 102.7 |
| 2    | 7.5  | 0 | 2 | 100 Room Air    | 101.4 |
| 1    | 8.3  | 0 | 1 | 90 Non-Rebreat  | 102.7 |
| 2    | 6.8  | 0 | 2 | 98 Non-Rebreat  | 102.2 |
| 2    | 4.6  | 0 | 2 | 96 Room Air     | 101.4 |
| 1    | 12.3 | 1 | 1 | 94 Room Air     | 102.1 |
| 1    | 13.7 | 1 | 2 | 100 Room Air    | 101.1 |
| 3    | 11.7 | 0 | 3 | 93 Room Air     | 101.3 |
| 3    | 8.1  | 0 | 3 | 89 Room Air     | 106.1 |
| 2    | 5.5  | 0 | 2 | 92 Room Air     | 106.5 |
| 2    | 10.2 | 0 | 1 | 91 Non-Rebreat  | 102.6 |
| 1    | 5.9  | 0 | 1 | 95 Room Air     | 98.9  |
| 0    | 7.4  | 0 | 0 | 99 Room Air     | 99.7  |
| 1    | 8.6  | 0 | 1 | 89 Room Air     | 100.6 |
| 1    | 3.8  | 1 | 1 | 97 Room Air     | 98.7  |
| 2 NA |      | 1 | 2 | 100 Room Air    | 98.2  |
| 4    | 4.8  | 0 | 3 | 95 Nasal Cannul | 102.4 |
| 4    | 20.3 | 1 | 4 | 70 Room Air     | 104.9 |
| 3    | 17.6 | 1 | 3 | 97 Nasal Cannul | 101.1 |
| 2    | 5.5  | 0 | 2 | 93 Room Air     | 103.2 |
| 2    | 8.5  | 0 | 2 | 95 Nasal Cannul | 98.8  |
| 3    | 6.9  | 0 | 3 | 95 Nasal Cannul | 102.8 |
| 2    | 4.6  | 0 | 2 | 93 Room Air     | 104.3 |
| 1    | 3.3  | 1 | 1 | 91 Room Air     | 101.6 |
| 2    | 2.6  | 1 | 2 | 83 Nasal Cannul | 100.3 |
| 3    | 5.4  | 0 | 3 | 93 Room Air     | 103.3 |
| 0    | 9.1  | 0 | 0 | 98 Room Air     | 102   |
| 1    | 8.5  | 0 | 1 | 94 Room Air     | 98.8  |
| 1    | 9.6  | 0 | 1 | 96 Nasal Cannul | 99.3  |
| 1    | 6.9  | 0 | 1 | 91 Room Air     | 101.8 |
| 2    | 3.5  | 1 | 2 | 92 Room Air     | 104.6 |
| 1    | 6.4  | 0 | 1 | 93 Room Air     | 99.9  |
| 3    | 4.4  | 0 | 2 | 100 Non-Rebreat | 102.9 |
| 2    | 2.9  | 1 | 2 | 94 Room Air     | 100.1 |
| 1    | 6    | 0 | 1 | 89 Room Air     | 99    |
| 3    | 3.7  | 1 | 3 | 90 Room Air     | 102.5 |

|   |      |   |   |                 |       |
|---|------|---|---|-----------------|-------|
| 1 | 6.1  | 0 | 0 | 98 Room Air     | 99.3  |
| 3 | 5.7  | 0 | 3 | 97 Nasal Cannul | 101.8 |
| 3 | 16.9 | 1 | 3 | 87 Room Air     | 99    |
| 3 | 12.5 | 1 | 3 | 99 Room Air     | 99.9  |
| 2 | 6    | 0 | 2 | 75 Nasal Cannul | 103.8 |
| 0 | 8.2  | 0 | 0 | 91 Room Air     | 100.7 |
| 2 | 6.1  | 0 | 2 | 93 Room Air     | 100.8 |
| 1 | 6.7  | 0 | 1 | 85 Room Air     | 102.5 |
| 1 | 15.7 | 1 | 2 | 95 Room Air     | 99.1  |
| 2 | 9.6  | 0 | 2 | 92 Room Air     | 99.2  |
| 1 | 4.8  | 0 | 1 | 95 Room Air     | 103.1 |
| 1 | 3.7  | 1 | 2 | 91 Room Air     | 103.2 |
| 1 | 6.8  | 0 | 0 | 91 Room Air     | 98.9  |
| 0 | 15.6 | 1 | 1 | 97 Room Air     | 101   |
| 2 | 12   | 1 | 2 | 93 Room Air     | 100.7 |
| 1 | 8    | 0 | 1 | 96 Room Air     | 99.9  |
| 0 | 4.4  | 0 | 0 | 99 Room Air     | 99.1  |
| 3 | 14.6 | 1 | 4 | 87 Nasal Cannul | 103.3 |
| 1 | 9.4  | 0 | 1 | 93 Nasal Cannul | 102.6 |
| 2 | 8.6  | 0 | 2 | 91 Room Air     | 98.9  |
| 1 | 5.3  | 0 | 1 | 76 Room Air     | 102.3 |
| 2 | 5.7  | 0 | 2 | 86 Room Air     | 102.7 |
| 2 | 3.2  | 1 | 2 | 96 Room Air     | 101.9 |
| 2 | 5.6  | 0 | 2 | 93 Room Air     | 100.1 |
| 2 | 5.9  | 0 | 1 | 94 Room Air     | 98.5  |
| 0 | 4.9  | 0 | 0 | 95 Nasal Cannul | 102   |
| 3 | 15.6 | 1 | 3 | 98 Nasal Cannul | 103   |
| 3 | 3.3  | 1 | 3 | 97 Room Air     | 102.9 |
| 2 | 8.2  | 0 | 2 | 73 Nasal Cannul | 102.7 |
| 3 | 8.2  | 0 | 2 | 99 Room Air     | 98.9  |
| 2 | 19.1 | 1 | 2 | 95 Nasal Cannul | 100.8 |
| 3 | 17.6 | 1 | 3 | 83 Non-Rebreat  | 99.3  |
| 1 | 8.2  | 0 | 1 | 97 Room Air     | 103.1 |
| 1 | 8.2  | 0 | 1 | 94 Room Air     | 103.4 |
| 1 | 5.8  | 0 | 1 | 95 Room Air     | 100   |
| 1 | 6.4  | 0 | 1 | 94 Room Air     | 99.3  |
| 4 | 26.7 | 1 | 4 | 68 Nasal Cannul | 103.4 |
| 1 | 9.4  | 0 | 1 | 98 NA           | 102.7 |
| 3 | 7.5  | 0 | 3 | 91 Nasal Cannul | 100.8 |
| 2 | 3.2  | 1 | 2 | 98 Room Air     | 98.9  |
| 1 | 6.1  | 0 | 1 | 93 Nasal Cannul | 101.5 |
| 1 | 9.1  | 0 | 1 | 97 Nasal Cannul | 102.3 |
| 2 | 6.4  | 0 | 2 | 70 Ventilator   | 101.2 |
| 1 | 7.3  | 0 | 1 | 91 Room Air     | 102.8 |
| 3 | 2.8  | 1 | 3 | 93 Room Air     | 103.5 |

|   |      |   |   |                  |       |
|---|------|---|---|------------------|-------|
| 2 | 4.8  | 0 | 2 | 91 Room Air      | 100.4 |
| 1 | 5.6  | 0 | 1 | 96 Room Air      | 98.6  |
| 0 | 9.9  | 0 | 0 | 96 Room Air      | 98.9  |
| 2 | 6.9  | 0 | 2 | 94 Nasal Cannul  | 103   |
| 1 | 3.3  | 1 | 1 | 99 Room Air      | 100.6 |
| 2 | 3.7  | 1 | 2 | 100 Room Air     | 99.4  |
| 2 | 6.4  | 0 | 2 | 96 Nasal Cannul  | 100.2 |
| 2 | 4    | 1 | 3 | 98 Nasal Cannul  | 101.7 |
| 1 | 4.1  | 0 | 0 | 97 Room Air      | 99.1  |
| 3 | 6.3  | 0 | 2 | 99 Room Air      | 98.7  |
| 0 | 6.2  | 0 | 0 | 100 Room Air     | 100.6 |
| 2 | 8.8  | 0 | 2 | 87 Room Air      | 101   |
| 2 | 6.6  | 0 | 2 | 94 Non-Rebreat   | 104   |
| 0 | 4.3  | 0 | 0 | 99 Room Air      | 98.5  |
| 2 | 5.9  | 0 | 2 | 100 Ventilator   | 101.7 |
| 2 | 6.5  | 0 | 2 | 100 Nasal Cannul | 104.6 |
| 0 | 8.4  | 0 | 0 | 96 Room Air      | 98.8  |
| 2 | 3.6  | 1 | 2 | 77 Room Air      | 100.8 |
| 2 | 30.5 | 1 | 2 | 92 Room Air      | 100.5 |
| 0 | 5.2  | 0 | 0 | 92 Room Air      | 102.8 |
| 1 | 3.2  | 1 | 1 | 97 Room Air      | 101.8 |
| 3 | 5    | 0 | 3 | 90 Room Air      | 101.3 |
| 3 | 11.1 | 0 | 3 | 89 Room Air      | 103.6 |
| 2 | 6.6  | 0 | 2 | 95 Room Air      | 100.7 |
| 2 | 26.9 | 1 | 2 | 95 Room Air      | 100.9 |
| 3 | 3.9  | 1 | 3 | 94 Room Air      | 98.8  |
| 3 | 10.2 | 0 | 3 | 96 Nasal Cannul  | 101.6 |
| 1 | 5.5  | 0 | 1 | 93 Nasal Cannul  | 99.3  |
| 3 | 15.8 | 1 | 3 | 93 Room Air      | 100   |
| 1 | 15.5 | 1 | 1 | 97 Nasal Cannul  | 101   |
| 2 | 8.3  | 0 | 1 | 99 Non-Rebreat   | 100.7 |
| 1 | 7.7  | 0 | 1 | 86 Non-Rebreat   | 100.3 |
| 1 | 5.4  | 0 | 1 | 97 Room Air      | 99    |
| 1 | 6.2  | 0 | 1 | 98 Room Air      | 98.7  |
| 2 | 15.3 | 1 | 2 | 97 Room Air      | 98.8  |
| 2 | 4.4  | 0 | 2 | 100 Non-Rebreat  | 100.1 |
| 2 | 5.5  | 0 | 2 | 93 Room Air      | 103   |
| 3 | 6.7  | 0 | 3 | 94 Nasal Cannul  | 102   |
| 2 | 8.2  | 0 | 2 | 94 Room Air      | 102   |
| 1 | 5    | 0 | 1 | 95 Room Air      | 99.2  |
| 3 | 8.1  | 0 | 2 | 95 Room Air      | 104.8 |
| 2 | 7.5  | 0 | 2 | 98 Room Air      | 98.3  |
| 2 | 7.1  | 0 | 2 | 96 Room Air      | 103   |
| 1 | 9.2  | 0 | 1 | 85 Room Air      | 99.4  |
| 3 | 4.7  | 0 | 2 | 95 Room Air      | 102.5 |

|   |      |   |   |                 |       |
|---|------|---|---|-----------------|-------|
| 2 | 4.1  | 0 | 1 | 94 Room Air     | 101   |
| 2 | 4.2  | 0 | 1 | 98 Nasal Cannul | 101.6 |
| 4 | 12.5 | 1 | 4 | 90 Nasal Cannul | 101.9 |
| 2 | 4.8  | 0 | 2 | 93 Room Air     | 99.7  |
| 1 | 4.5  | 0 | 1 | 97 NA           | 98.5  |
| 2 | 4.8  | 0 | 1 | 89 Room Air     | 98.6  |
| 1 | 8.3  | 0 | 1 | 92 Non-Rebreat  | 99    |
| 1 | 8.6  | 0 | 1 | 89 Room Air     | 99.5  |
| 2 | 7.9  | 0 | 2 | 94 Non-Rebreat  | 102   |
| 0 | 6    | 0 | 0 | 100 Room Air    | 98.8  |
| 1 | 6    | 0 | 1 | 96 Room Air     | 101   |
| 2 | 4.9  | 0 | 1 | 99 Room Air     | 100.9 |
| 3 | 3.2  | 1 | 3 | 85 Non-Rebreat  | 104   |
| 2 | 3.6  | 1 | 2 | 100 Room Air    | 98.8  |
| 1 | 6.8  | 0 | 1 | 96 Room Air     | 102.8 |
| 4 | 15.2 | 1 | 4 | 83 Room Air     | 103.1 |
| 2 | 5.3  | 0 | 1 | 96 Room Air     | 99.6  |
| 3 | 6.5  | 0 | 2 | 89 Room Air     | 99.1  |
| 2 | 5.7  | 0 | 1 | 96 Room Air     | 99.9  |
| 2 | 6.6  | 0 | 2 | 91 Room Air     | 102.1 |
| 2 | 14.4 | 1 | 3 | 96 Nasal Cannul | 98.8  |
| 2 | 4    | 1 | 3 | 97 Room Air     | 103.1 |
| 3 | 8.9  | 0 | 3 | 87 Room Air     | 101.2 |
| 1 | 4.5  | 0 | 0 | 93 Room Air     | 101.1 |
| 4 | 9.4  | 0 | 3 | 95 Room Air     | 102.4 |
| 2 | 9    | 0 | 2 | 93 Room Air     | 102.8 |
| 3 | 17.5 | 1 | 3 | 87 Nasal Cannul | 98.5  |
| 3 | 6.1  | 0 | 3 | 96 Nasal Cannul | 102.9 |
| 0 | 5.9  | 0 | 0 | 96 Room Air     | 101.3 |
| 3 | 4.7  | 0 | 3 | 94 Nasal Cannul | 102.6 |
| 2 | 8.4  | 0 | 2 | 95 Non-Rebreat  | 100.1 |
| 2 | 10.1 | 0 | 2 | 85 Room Air     | 98.7  |
| 4 | 15.3 | 1 | 4 | 91 Room Air     | 103.4 |
| 2 | 4.3  | 0 | 2 | 91 Room Air     | 103.1 |
| 2 | 4.6  | 0 | 2 | 93 Room Air     | 100.3 |
| 2 | 2.9  | 1 | 3 | 95 Room Air     | 103.2 |
| 1 | 10   | 0 | 1 | 98 Room Air     | 98.7  |
| 1 | 7    | 0 | 1 | 97 Room Air     | 99.1  |
| 1 | 5.7  | 0 | 1 | 96 Room Air     | 103.1 |
| 1 | 5.9  | 0 | 1 | 96 Non-Rebreat  | 104.3 |
| 2 | 5    | 0 | 1 | 90 Room Air     | 101   |
| 1 | 6.4  | 0 | 1 | 99 Nasal Cannul | 102.9 |
| 1 | 5.9  | 0 | 1 | 99 Room Air     | 98.5  |
| 2 | 9.2  | 0 | 2 | 96 Room Air     | 99    |
| 3 | 5.6  | 0 | 3 | 93 Room Air     | 104   |

|   |       |   |      |                  |       |
|---|-------|---|------|------------------|-------|
| 2 | 8.3   | 0 | 2    | 82 Non-Rebreath  | 100.6 |
| 2 | 7.3   | 0 | 2    | 92 Room Air      | 101.5 |
| 2 | 5.4   | 0 | 2    | 97 Room Air      | 102.7 |
| 2 | 15.6  | 1 | 2    | 98 Room Air      | 103.8 |
| 1 | 24.9  | 1 | 1    | 99 Room Air      | 98.8  |
| 2 | 5.2   | 0 | 2    | 97 Room Air      | 102.7 |
| 2 | 10.5  | 0 | 1    | 86 Room Air      | 101   |
| 0 | 7     | 0 | 0    | 100 Room Air     | 98.9  |
| 4 | 18.4  | 1 | 4    | 98 Room Air      | 101.1 |
| 3 | 9.7   | 0 | 2    | 93 Nasal Cannul  | 100.7 |
| 1 | 9.2   | 0 | 1    | 96 Room Air      | 99.1  |
| 3 | 8.4   | 0 | 3    | 91 NA            | 100.4 |
| 3 | 4.3   | 0 | 2    | 98 Room Air      | 100.5 |
| 0 | 7.8   | 0 | 0    | 97 Room Air      | 99.9  |
| 3 | 4.6   | 0 | 3    | 84 Nasal Cannul  | 102.8 |
| 3 | 5.3   | 0 | 3    | 92 Non-Rebreath  | 103   |
| 1 | 5.9   | 0 | 1    | 80 Non-Rebreath  | 102.3 |
| 1 | 8.5   | 0 | 1    | 88 Nasal Cannul  | 100   |
| 3 | 7.2   | 0 | 3    | 95 Nasal Cannul  | 102.5 |
| 0 | 7.7   | 0 | 0    | 94 Nasal Cannul  | 97    |
| 2 | 11.5  | 0 | 2    | 77 Non-Rebreath  | 100   |
| 2 | 23.9  | 1 | 2    | 95 Nasal Cannul  | 98.5  |
| 1 | 6.7   | 0 | 1    | 89 Nasal Cannul  | 100   |
| 1 | 6.7   | 0 | 1    | 100 Non-Rebreath | 102   |
| 0 | 4.4   | 0 | 0    | 97 Room Air      | 99.3  |
| 0 | 8.7   | 0 | 0    | 96 NA            | 99.3  |
| 1 | 12.5  | 1 | 2    | 100 Non-Rebreath | 99.4  |
| 2 | 5.3   | 0 | 2    | 100 Nasal Cannul | 102   |
| 4 | 13.1  | 1 | 4    | 74 Non-Rebreath  | 103.8 |
| 2 | 5.9   | 0 | 2    | 90 Nasal Cannul  | 101.3 |
| 2 | 5.3   | 0 | 2    | 94 Nasal Cannul  | 102.2 |
| 3 | 13.9  | 1 | 3    | 95 Nasal Cannul  | 100.7 |
| 3 | 169.8 | 1 | 3    | 96 Room Air      | 100.4 |
| 2 | 5.5   | 0 | 2    | 97 Room Air      | 103.3 |
| 0 | 7.3   | 0 | 0    | 88 Nasal Cannul  | 101.6 |
| 1 | 9.3   | 0 | 1    | 91 Non-Rebreath  | 100.8 |
| 0 | 7.3   | 0 | 0    | 97 Room Air      | 100.2 |
| 3 | 24.2  | 1 | 3    | 94 Nasal Cannul  | 99.2  |
| 1 | 19.6  | 1 | 2    | 96 Room Air      | 100   |
| 2 | 14.3  | 1 | 2    | 98 Room Air      | 99.1  |
| 4 | 6.7   | 0 | 3    | 96 Room Air      | 103   |
| 2 | 12.8  | 1 | 2 NA | NA               | NA    |
| 1 | 5.3   | 0 | 1    | 91 Room Air      | 99.3  |
| 2 | 3.5   | 1 | 2    | 98 Room Air      | 100.9 |
| 2 | 7.2   | 0 | 2    | 82 Room Air      | 104   |

|   |      |   |   |                 |       |
|---|------|---|---|-----------------|-------|
| 2 | 7.5  | 0 | 2 | 99 Room Air     | 102.9 |
| 3 | 6.3  | 0 | 3 | 94 Room Air     | 102.9 |
| 1 | 5.1  | 0 | 1 | 95 Nasal Cannul | 101   |
| 2 | 5.1  | 0 | 2 | 91 Room Air     | 101.7 |
| 1 | 4.8  | 0 | 1 | 97 Room Air     | 103.3 |
| 1 | 10.4 | 0 | 1 | 93 Nasal Cannul | 99    |
| 1 | 5.6  | 0 | 1 | 91 Room Air     | 99.3  |
| 0 | 5.8  | 0 | 0 | 98 Room Air     | 109   |
| 2 | 4.5  | 0 | 1 | 98 Room Air     | 100.9 |
| 3 | 3.6  | 1 | 3 | 93 Room Air     | 102.8 |
| 2 | 5    | 0 | 2 | 88 Nasal Cannul | 100.7 |
| 1 | 6.5  | 0 | 1 | 96 Nasal Cannul | 101.8 |
| 1 | 5.2  | 0 | 1 | 95 Room Air     | 101.1 |
| 1 | 5.1  | 0 | 1 | 97 Nasal Cannul | 102   |
| 2 | 12.6 | 1 | 3 | 86 Nasal Cannul | 99.2  |
| 1 | 4.9  | 0 | 1 | 90 Room Air     | 103.1 |
| 1 | 6    | 0 | 1 | 95 Room Air     | 99.1  |
| 2 | 9.9  | 0 | 2 | 94 Nasal Cannul | 98.5  |
| 1 | 10.3 | 0 | 1 | 89 Non-Rebreat  | 99.2  |
| 2 | 5.7  | 0 | 2 | 98 Room Air     | 102.2 |
| 2 | 9.9  | 0 | 2 | 93 Ventilator   | 103.6 |
| 2 | 4.1  | 0 | 2 | 98 Room Air     | 103   |
| 1 | 5.5  | 0 | 1 | 99 Room Air     | 100.1 |
| 0 | 11.9 | 0 | 0 | 88 Room Air     | 101.6 |
| 3 | 3.9  | 1 | 4 | 79 Nasal Cannul | 101.2 |
| 1 | 4.3  | 0 | 0 | 97 Room Air     | 102.6 |
| 2 | 5.4  | 0 | 2 | 92 Room Air     | 98.4  |
| 1 | 6.8  | 0 | 1 | 96 Nasal Cannul | 102.3 |
| 3 | 11.6 | 0 | 3 | 98 Room Air     | 100.4 |
| 4 | 5.3  | 0 | 3 | 95 Room Air     | 104   |
| 1 | 10.8 | 0 | 1 | 96 Nasal Cannul | 99.5  |
| 1 | 4.5  | 0 | 1 | 91 Nasal Cannul | 98.5  |
| 2 | 5.8  | 0 | 1 | 100 Room Air    | 99    |
| 2 | 5.1  | 0 | 2 | 89 Nasal Cannul | 101.8 |
| 3 | 10.2 | 0 | 3 | 97 Non-Rebreat  | 103.3 |
| 3 | 8.5  | 0 | 3 | 87 Nasal Cannul | 102.8 |
| 1 | 6.5  | 0 | 1 | 91 Nasal Cannul | 102.9 |
| 1 | 6.5  | 0 | 1 | 79 Nasal Cannul | 103.2 |
| 1 | 7.1  | 0 | 1 | 92 Nasal Cannul | 100.8 |
| 2 | 7.3  | 0 | 2 | 94 Nasal Cannul | 103.7 |
| 2 | 7.2  | 0 | 2 | 92 Room Air     | 100.9 |
| 3 | 4.6  | 0 | 3 | 91 Nasal Cannul | 102.3 |
| 2 | 6.7  | 0 | 1 | 95 Nasal Cannul | 99.2  |
| 0 | 9    | 0 | 0 | 98 Nasal Cannul | 102   |
| 2 | 6.4  | 0 | 2 | 95 Room Air     | 99.6  |



|   |      |   |   |                 |       |
|---|------|---|---|-----------------|-------|
| 2 | 4.2  | 0 | 2 | 93 Room Air     | 103.1 |
| 2 | 6.2  | 0 | 2 | 96 Room Air     | 101.1 |
| 0 | 4.4  | 0 | 0 | 92 Room Air     | 99.3  |
| 1 | 12.2 | 1 | 2 | 96 Room Air     | 99.4  |
| 1 | 9.2  | 0 | 1 | 91 Room Air     | 102.7 |
| 3 | 7.2  | 0 | 3 | 94 Room Air     | 103.5 |
| 3 | 14.4 | 1 | 4 | 73 Nasal Cannul | 101.5 |
| 1 | 8    | 0 | 1 | 97 Room Air     | 99.2  |
| 2 | 7.4  | 0 | 2 | 95 Room Air     | 102.8 |
| 2 | 3.6  | 1 | 2 | 96 Nasal Cannul | 101.9 |
| 2 | 3.2  | 1 | 2 | 97 Room Air     | 98.5  |
| 2 | 5.1  | 0 | 2 | 91 Room Air     | 98.9  |
| 3 | 7.4  | 0 | 3 | 91 Nasal Cannul | 101.6 |
| 2 | 12.6 | 1 | 3 | 98 Room Air     | 100.2 |
| 0 | 5.5  | 0 | 0 | 100 Non-Rebreat | 100.1 |
| 1 | 8.4  | 0 | 1 | 72 Room Air     | 100.4 |
| 2 | 7.3  | 0 | 1 | 94 Non-Rebreat  | 102.1 |
| 0 | 9.1  | 0 | 0 | 95 Nasal Cannul | 101.1 |
| 0 | 4.9  | 0 | 0 | 95 Nasal Cannul | 103.1 |
| 2 | 5.6  | 0 | 2 | 80 Non-Rebreat  | 103   |
| 2 | 6.1  | 0 | 2 | 96 Room Air     | 103.8 |
| 3 | 5.3  | 0 | 3 | 93 Nasal Cannul | 103.1 |
| 1 | 6.4  | 0 | 1 | 93 Room Air     | 99.2  |
| 2 | 11.3 | 0 | 2 | 96 Room Air     | 99.1  |
| 2 | 6.6  | 0 | 2 | 91 Room Air     | 104.7 |
| 1 | 3.6  | 1 | 2 | 91 Nasal Cannul | 102.9 |
| 2 | 4.6  | 0 | 2 | 92 Room Air     | 103.2 |
| 2 | 4.4  | 0 | 2 | 98 Non-Rebreat  | 102.1 |
| 2 | 9.3  | 0 | 2 | 96 Room Air     | 101   |
| 1 | 7.3  | 0 | 1 | 98 Nasal Cannul | 102.9 |
| 0 | 5.9  | 0 | 0 | 98 Room Air     | 98.7  |
| 2 | 4.1  | 0 | 2 | 92 Room Air     | 101.2 |
| 1 | 4.7  | 0 | 1 | 95 Non-Rebreat  | 100.4 |
| 1 | 7.2  | 0 | 1 | 97 Room Air     | 100   |
| 1 | 5.3  | 0 | 1 | 96 Non-Rebreat  | 99.1  |
| 3 | 5.6  | 0 | 2 | 98 Room Air     | 103   |
| 3 | 5.6  | 0 | 2 | 91 Room Air     | 100.1 |
| 1 | 8.1  | 0 | 1 | 93 Room Air     | 100.6 |
| 1 | 9.1  | 0 | 1 | 97 Room Air     | 100.2 |
| 1 | 4.4  | 0 | 1 | 93 Nasal Cannul | 100.9 |
| 2 | 6.4  | 0 | 2 | 100 Room Air    | 102.9 |
| 2 | 6.3  | 0 | 2 | 93 Room Air     | 99    |
| 1 | 4.7  | 0 | 1 | 91 Room Air     | 101.2 |
| 3 | 13.4 | 1 | 3 | 99 Non-Rebreat  | 101.5 |
| 1 | 8.5  | 0 | 1 | 94 Room Air     | 104.1 |

|   |      |   |   |                 |       |
|---|------|---|---|-----------------|-------|
| 2 | 3.1  | 1 | 2 | 90 Room Air     | 101.2 |
| 3 | 5.3  | 0 | 3 | 99 Nasal Cannul | 101.4 |
| 0 | 5.8  | 0 | 0 | 93 Room Air     | 102.7 |
| 2 | 8.3  | 0 | 2 | 92 Room Air     | 101.7 |
| 2 | 11   | 0 | 2 | 88 Room Air     | 101.4 |
| 3 | 6.1  | 0 | 3 | 96 Room Air     | 103.4 |
| 3 | 9.6  | 0 | 3 | 83 Room Air     | 103.8 |
| 2 | 9    | 0 | 1 | 94 Room Air     | 102.5 |
| 3 | 6.7  | 0 | 3 | 95 Nasal Cannul | 102.4 |
| 2 | 9.8  | 0 | 2 | 94 Room Air     | 100.3 |
| 4 | 10.3 | 0 | 3 | 95 Nasal Cannul | 102.4 |
| 1 | 5.2  | 0 | 1 | 100 Room Air    | 101.9 |
| 1 | 13.4 | 1 | 1 | 97 Room Air     | 99.6  |
| 3 | 9.8  | 0 | 3 | 50 Room Air     | 101.8 |
| 1 | 8    | 0 | 1 | 100 Non-Rebreat | 99.5  |
| 1 | 5    | 0 | 1 | 99 Non-Rebreat  | 98.8  |
| 0 | 4.4  | 0 | 0 | 93 Room Air     | 99.4  |
| 2 | 8.6  | 0 | 2 | 85 Room Air     | 101.9 |
| 1 | 6.9  | 0 | 1 | 93 Room Air     | 98.8  |
| 3 | 3.2  | 1 | 3 | 97 Room Air     | 102.7 |
| 1 | 3.5  | 1 | 1 | 99 Room Air     | 99.1  |
| 2 | 6.8  | 0 | 2 | 98 Ventilator   | 103.6 |
| 4 | 4.1  | 0 | 3 | 95 Room Air     | 100.6 |
| 2 | 8.9  | 0 | 2 | 82 Room Air     | 100.5 |
| 0 | 12.2 | 1 | 1 | 97 Room Air     | 99.5  |
| 2 | 13.8 | 1 | 2 | 95 Room Air     | 99.4  |
| 3 | 18.7 | 1 | 3 | 100 Room Air    | 101.6 |
| 3 | 8.2  | 0 | 3 | 93 Nasal Cannul | 101.8 |
| 2 | 12.3 | 1 | 3 | 93 Room Air     | 102.8 |
| 1 | 7.9  | 0 | 1 | 80 Room Air     | 100.8 |
| 1 | 5.2  | 0 | 1 | 92 Room Air     | 100.7 |
| 2 | 5.9  | 0 | 2 | 100 Room Air    | 101.5 |
| 4 | 12.1 | 1 | 4 | 93 Room Air     | 102   |
| 2 | 7    | 0 | 2 | 93 Room Air     | 101.7 |
| 1 | 8.5  | 0 | 1 | 90 Room Air     | 102.7 |
| 0 | 12.3 | 1 | 1 | 99 Room Air     | 103.1 |
| 2 | 13.4 | 1 | 3 | 95 Nasal Cannul | 99.2  |
| 4 | 14.7 | 1 | 4 | 89 Room Air     | 100.8 |
| 2 | 7.7  | 0 | 2 | 94 Room Air     | 103.1 |
| 2 | 14.2 | 1 | 3 | 78 Room Air     | 102.2 |
| 1 | 8.2  | 0 | 0 | 99 Room Air     | 98.2  |
| 2 | 16.9 | 1 | 3 | 84 Non-Rebreat  | 101.8 |
| 1 | 4    | 1 | 2 | 85 Room Air     | 103   |
| 2 | 10.4 | 0 | 2 | 91 Nasal Cannul | 99.3  |
| 1 | 14.7 | 1 | 2 | 98 Room Air     | 98.9  |

|   |      |   |   |                  |       |
|---|------|---|---|------------------|-------|
| 3 | 17.5 | 1 | 3 | 89 Room Air      | 100.8 |
| 2 | 8.2  | 0 | 2 | 93 Room Air      | 100.6 |
| 1 | 8.2  | 0 | 1 | 94 Room Air      | 100.7 |
| 2 | 6.1  | 0 | 2 | 89 Room Air      | 101.9 |
| 2 | 10   | 0 | 2 | 93 Room Air      | 99.7  |
| 2 | 7.8  | 0 | 2 | 100 Non-Rebreat  | 99.6  |
| 2 | 5.7  | 0 | 2 | 96 Room Air      | 101.3 |
| 3 | 9.8  | 0 | 3 | 88 Room Air      | 103.1 |
| 4 | 13.7 | 1 | 4 | 91 Room Air      | 103.2 |
| 1 | 24   | 1 | 1 | 96 Nasal Cannul  | 100.4 |
| 2 | 8.8  | 0 | 2 | 91 Room Air      | 101.9 |
| 3 | 5.2  | 0 | 3 | 95 Room Air      | 101.9 |
| 2 | 5.4  | 0 | 2 | 91 Non-Rebreat   | 104   |
| 2 | 11.1 | 0 | 2 | 95 Room Air      | 98.5  |
| 2 | 5.4  | 0 | 1 | 97 Room Air      | 103.1 |
| 3 | 2.6  | 1 | 3 | 95 Nasal Cannul  | 103.1 |
| 1 | 8.1  | 0 | 1 | 94 Room Air      | 104.6 |
| 3 | 11.1 | 0 | 2 | 96 Room Air      | 103.1 |
| 2 | 11.7 | 0 | 2 | 96 Ventilator    | 99.7  |
| 0 | 4.7  | 0 | 0 | 99 Room Air      | 104.1 |
| 1 | 14.8 | 1 | 1 | 98 Room Air      | 102.2 |
| 1 | 12.2 | 1 | 2 | 99 Room Air      | 99    |
| 2 | 9.1  | 0 | 2 | 95 Room Air      | 102.1 |
| 0 | 8.9  | 0 | 0 | 99 Room Air      | 98.6  |
| 2 | 6    | 0 | 2 | 85 Nasal Cannul  | 100.8 |
| 2 | 6.5  | 0 | 2 | 93 Nasal Cannul  | 103   |
| 1 | 7.8  | 0 | 1 | 100 Nasal Cannul | 102.5 |
| 2 | 4.4  | 0 | 2 | 94 Room Air      | 101.3 |
| 3 | 2.1  | 1 | 3 | 97 Room Air      | 101.5 |
| 2 | 6.6  | 0 | 2 | 96 Nasal Cannul  | 103.3 |
| 1 | 7.1  | 0 | 1 | 72 Room Air      | 99.9  |
| 1 | 9.9  | 0 | 1 | 100 Nasal Cannul | 98.7  |
| 1 | 11.8 | 0 | 0 | 100 Room Air     | 99.4  |
| 1 | 6.7  | 0 | 1 | 100 Room Air     | 99.5  |
| 2 | 7.9  | 0 | 2 | 93 Nasal Cannul  | 104.3 |
| 0 | 8.1  | 0 | 0 | 99 Room Air      | 98.7  |
| 2 | 5.9  | 0 | 2 | 96 Nasal Cannul  | 101.3 |
| 2 | 8.7  | 0 | 2 | 70 Room Air      | 100.8 |
| 2 | 10.8 | 0 | 2 | 94 Nasal Cannul  | 99.5  |
| 2 | 9.6  | 0 | 2 | 97 Room Air      | 99.9  |
| 1 | 6.3  | 0 | 1 | 97 Room Air      | 99.7  |
| 1 | 7    | 0 | 0 | 98 Room Air      | 101.7 |
| 2 | 8.7  | 0 | 2 | 66 Room Air      | 99.4  |
| 0 | 5.5  | 0 | 0 | 96 Room Air      | 100.6 |
| 3 | 7.1  | 0 | 3 | 92 Room Air      | 101.4 |

|    |    |      |    |   |                 |       |
|----|----|------|----|---|-----------------|-------|
|    | 3  | 8.9  | 0  | 3 | 93 Nasal Cannul | 104   |
|    | 2  | 11.1 | 0  | 2 | 91 Nasal Cannul | 99.2  |
|    | 2  | 5.3  | 0  | 1 | 96 Room Air     | 100   |
|    | 1  | 5.8  | 0  | 1 | 95 Room Air     | 102.3 |
|    | 3  | 9.3  | 0  | 2 | 95 Room Air     | 99.6  |
| NA | NA | NA   | NA |   | 93 Room Air     | 101   |
|    | 1  | 10.6 | 0  | 1 | 93 Room Air     | 100.9 |
|    | 3  | 18.4 | 1  | 3 | 88 Room Air     | 102.3 |
|    | 3  | 11.5 | 0  | 2 | 93 Room Air     | 100.5 |
|    | 0  | 6.3  | 0  | 0 | 96 Room Air     | 99.1  |
|    | 1  | 6.6  | 0  | 1 | 96 Room Air     | 99.4  |
|    | 1  | 4.9  | 0  | 1 | 93 Room Air     | 102.9 |
|    | 0  | 6.6  | 0  | 0 | 97 Room Air     | 100.6 |
|    | 2  | 8    | 0  | 2 | 93 Room Air     | 98.9  |
|    | 1  | 5.6  | 0  | 1 | 93 Room Air     | 102.3 |
|    | 1  | 16.2 | 1  | 1 | 99 Room Air     | 99.3  |
|    | 3  | 6.9  | 0  | 3 | 92 Room Air     | 101.8 |
|    | 1  | 5.1  | 0  | 1 | 97 Room Air     | 99.8  |
|    | 2  | 8.4  | 0  | 2 | 90 Non-Rebreat  | 102.8 |
|    | 2  | 5.7  | 0  | 2 | 88 Room Air     | 103.3 |
|    | 0  | 11.8 | 0  | 0 | 95 Room Air     | 100.1 |
|    | 0  | 5.9  | 0  | 0 | 88 Room Air     | 100   |
|    | 1  | 4.3  | 0  | 1 | 97 Room Air     | 104   |
|    | 2  | 4.7  | 0  | 1 | 93 Room Air     | 102.9 |
|    | 3  | 4.3  | 0  | 2 | 97 Room Air     | 98.2  |
|    | 2  | 2.1  | 1  | 2 | 97 Room Air     | 100.3 |
|    | 3  | 14.7 | 1  | 3 | 99 Room Air     | 98.9  |
|    | 0  | 4.7  | 0  | 0 | 100 Room Air    | 98.6  |
|    | 1  | 3    | 1  | 1 | 94 Room Air     | 103.3 |
|    | 2  | 4    | 1  | 2 | 100 Room Air    | 99.3  |
|    | 0  | 5.2  | 0  | 0 | 95 Room Air     | 98.7  |
|    | 1  | 6.9  | 0  | 1 | 95 Nasal Cannul | 99.7  |
|    | 1  | 10.7 | 0  | 1 | 97 Room Air     | 99    |
|    | 2  | 10.4 | 0  | 2 | 95 Nasal Cannul | 100.1 |
|    | 3  | 8.7  | 0  | 3 | 92 Room Air     | 102.7 |
|    | 2  | 6.6  | 0  | 2 | 96 Room Air     | 103.2 |
|    | 2  | 7    | 0  | 2 | 93 Room Air     | 100   |
|    | 3  | 4.6  | 0  | 3 | 97 Room Air     | 102.2 |
|    | 3  | 6.1  | 0  | 3 | 92 Room Air     | 102   |
|    | 2  | 9.3  | 0  | 2 | 97 Nasal Cannul | 102.9 |
|    | 1  | 7.7  | 0  | 1 | 92 Room Air     | 99.7  |
|    | 1  | 6.1  | 0  | 1 | 95 Room Air     | 99.8  |
|    | 1  | 20.1 | 1  | 1 | 83 Room Air     | 100.6 |
|    | 2  | 8.6  | 0  | 2 | 96 Nasal Cannul | 102.8 |
|    | 2  | 3.1  | 1  | 3 | 98 Nasal Cannul | 100.8 |

|   |      |   |   |                 |       |
|---|------|---|---|-----------------|-------|
| 3 | 8.4  | 0 | 3 | 96 Room Air     | 102.9 |
| 1 | 5.9  | 0 | 1 | 82 Room Air     | 102.3 |
| 0 | 6.6  | 0 | 0 | 97 Room Air     | 103.2 |
| 3 | 11.9 | 0 | 3 | 86 Room Air     | 100.9 |
| 1 | 6.7  | 0 | 1 | 81 Room Air     | 98.5  |
| 0 | 9.9  | 0 | 0 | 97 Room Air     | 99.9  |
| 2 | 7.5  | 0 | 1 | 97 Room Air     | 102.6 |
| 0 | 6    | 0 | 0 | 98 Room Air     | 100.7 |
| 2 | 6.1  | 0 | 2 | 93 Room Air     | 103.6 |
| 2 | 13.5 | 1 | 3 | 84 Room Air     | 99.8  |
| 2 | 10   | 0 | 2 | 86 Nasal Cannul | 104   |
| 1 | 5.4  | 0 | 1 | 95 Non-Rebreat  | 102.5 |
| 2 | 5.7  | 0 | 2 | 98 Nasal Cannul | 101.3 |
| 2 | 4.9  | 0 | 2 | 96 Room Air     | 101.7 |
| 1 | 10.2 | 0 | 1 | 87 Room Air     | 102.3 |
| 3 | 7.1  | 0 | 3 | 92 Room Air     | 103   |
| 2 | 7.1  | 0 | 2 | 92 Nasal Cannul | 104.2 |
| 2 | 8.5  | 0 | 2 | 94 Nasal Cannul | 100   |
| 1 | 4    | 1 | 1 | 96 Room Air     | 98.9  |
| 1 | 14.1 | 1 | 1 | 100 Room Air    | 102.7 |
| 0 | 4.9  | 0 | 0 | 100 Room Air    | 99.5  |
| 2 | 17.2 | 1 | 3 | 73 Nasal Cannul | 100   |
| 0 | 7.2  | 0 | 0 | 94 Room Air     | 103.9 |
| 1 | 12.4 | 1 | 2 | 98 Room Air     | 102.4 |
| 0 | 9.6  | 0 | 0 | 99 Room Air     | 99.2  |
| 1 | 11.8 | 0 | 1 | 79 Room Air     | 103.1 |
| 2 | 11.2 | 0 | 1 | 89 Nasal Cannul | 98.8  |
| 2 | 5.6  | 0 | 2 | 86 Room Air     | 100.6 |
| 1 | 6.9  | 0 | 1 | 96 Room Air     | 99.5  |
| 1 | 6.2  | 0 | 1 | 95 Room Air     | 103   |
| 1 | 7.1  | 0 | 1 | 96 Nasal Cannul | 99.8  |
| 2 | 3.3  | 1 | 2 | 96 Room Air     | 102.7 |
| 0 | 5.6  | 0 | 0 | 98 Room Air     | 99    |
| 1 | 7.5  | 0 | 1 | 96 Room Air     | 99.1  |
| 1 | 5.3  | 0 | 1 | 80 Room Air     | 103   |
| 2 | 6.7  | 0 | 1 | 100 Room Air    | 98.7  |
| 1 | 10.7 | 0 | 1 | 97 Nasal Cannul | 100.9 |
| 1 | 12.3 | 1 | 2 | 89 Room Air     | 102.8 |
| 1 | 7.4  | 0 | 1 | 92 Room Air     | 99.5  |
| 1 | 10.9 | 0 | 1 | 86 Room Air     | 102.9 |
| 3 | 12.6 | 1 | 4 | 92 Non-Rebreat  | 103.9 |
| 1 | 6.4  | 0 | 1 | 93 Room Air     | 99    |
| 1 | 9    | 0 | 1 | 97 Room Air     | 98.4  |
| 1 | 21.5 | 1 | 2 | 100 Room Air    | 98.8  |
| 0 | 9.4  | 0 | 0 | 95 Room Air     | 99.6  |

|      |      |   |   |                  |       |
|------|------|---|---|------------------|-------|
| 0    | 18.1 | 1 | 1 | 99 Room Air      | 99.2  |
| 3    | 20.5 | 1 | 3 | 92 Room Air      | 99.3  |
| 2    | 6    | 0 | 2 | 85 Room Air      | 101.4 |
| 3    | 2.2  | 1 | 3 | 83 Room Air      | 104   |
| 2    | 21.3 | 1 | 2 | 97 Room Air      | 101.4 |
| 1    | 6.6  | 0 | 1 | 92 Room Air      | 101.3 |
| 2    | 4.2  | 0 | 2 | 89 Non-Rebreat   | 103.1 |
| 2    | 7.8  | 0 | 2 | 98 Non-Rebreat   | 104.4 |
| 2    | 12.5 | 1 | 3 | 99 Room Air      | 102   |
| 3    | 15   | 1 | 3 | 90 Room Air      | 101   |
| 2    | 5.3  | 0 | 1 | 98 Room Air      | 99.9  |
| 1    | 4.1  | 0 | 0 | 96 Room Air      | 101.3 |
| 1    | 6.7  | 0 | 1 | 95 Room Air      | 102.9 |
| 4    | 4.9  | 0 | 3 | 94 Room Air      | 103.2 |
| 2    | 7.2  | 0 | 2 | 94 Non-Rebreat   | 103.5 |
| 1    | 5.6  | 0 | 1 | 87 Room Air      | 99    |
| 2    | 25.7 | 1 | 2 | 86 Room Air      | 98.9  |
| 3    | 5.1  | 0 | 3 | 94 Room Air      | 103.4 |
| 2    | 6.9  | 0 | 2 | 93 Room Air      | 102.9 |
| 2    | 11.7 | 0 | 1 | 98 Nasal Cannul  | 101.6 |
| 3    | 7.2  | 0 | 3 | 93 Non-Rebreat   | 102.7 |
| 3    | 4.6  | 0 | 2 | 96 Nasal Cannul  | 103.4 |
| 2    | 4.7  | 0 | 2 | 92 Room Air      | 103.2 |
| 0    | 9.6  | 0 | 0 | 98 Room Air      | 98.4  |
| 3    | 8.2  | 0 | 3 | 92 Room Air      | 102.5 |
| 4    | 16.8 | 1 | 4 | 86 Non-Rebreat   | 101   |
| 2    | 10.8 | 0 | 2 | 79 Room Air      | 101.2 |
| 2    | 13.5 | 1 | 3 | 99 Non-Rebreat   | 104.5 |
| 1    | 8.2  | 0 | 1 | 90 Room Air      | 103.1 |
| 2    | 8.7  | 0 | 2 | 90 Non-Rebreat   | 103.6 |
| 3    | 14.7 | 1 | 3 | 93 Ventilator    | 104   |
| 2    | 5.8  | 0 | 2 | 93 Room Air      | 99.9  |
| 2    | 12.3 | 1 | 3 | 76 Non-Rebreat   | 98.8  |
| 2    | 9.1  | 0 | 2 | 99 Nasal Cannul  | 100.2 |
| 2    | 8.1  | 0 | 2 | 92 Room Air      | 102.9 |
| 1    | 5.9  | 0 | 1 | 94 Room Air      | 103.1 |
| 3    | 4.3  | 0 | 2 | 93 Room Air      | 101.5 |
| 3    | 5.4  | 0 | 2 | 99 Room Air      | 100.6 |
| 4    | 3.6  | 1 | 4 | 98 Room Air      | 103   |
| 3    | 7.3  | 0 | 3 | 96 Room Air      | 103.3 |
| 1    | 11.5 | 0 | 0 | 92 Room Air      | 102.8 |
| 2 NA |      | 1 | 2 | 100 Nasal Cannul | 98.1  |
| 3    | 2.9  | 1 | 3 | 96 Room Air      | 103.4 |
| 0    | 10.7 | 0 | 0 | 99 Room Air      | 99.1  |
| 4    | 3.8  | 1 | 4 | 96 Room Air      | 102.7 |

|   |      |   |   |                  |       |
|---|------|---|---|------------------|-------|
| 2 | 3.2  | 1 | 3 | 91 Room Air      | 100.5 |
| 1 | 4.3  | 0 | 0 | 93 Room Air      | 101.4 |
| 0 | 7.5  | 0 | 0 | 100 Room Air     | 99    |
| 2 | 5.1  | 0 | 2 | 91 Room Air      | 100.8 |
| 3 | 22.3 | 1 | 3 | 92 Non-Rebreath  | 103.5 |
| 1 | 4.2  | 0 | 0 | 99 Room Air      | 98.8  |
| 3 | 8.1  | 0 | 2 | 80 Nasal Cannul  | 100.8 |
| 2 | 7.4  | 0 | 2 | 92 Room Air      | 103   |
| 3 | 9.4  | 0 | 3 | 96 Room Air      | 102.7 |
| 2 | 11.1 | 0 | 2 | 97 Room Air      | 102.1 |
| 3 | 17.4 | 1 | 3 | 75 Room Air      | 102.4 |
| 2 | 10.4 | 0 | 2 | 100 Non-Rebreath | 102.5 |
| 2 | 5.5  | 0 | 2 | 99 Room Air      | 102.2 |
| 1 | 5.9  | 0 | 1 | 99 Room Air      | 99    |
| 3 | 6.1  | 0 | 3 | 98 Nasal Cannul  | 100.1 |
| 3 | 13   | 1 | 4 | 92 Room Air      | 98.5  |
| 2 | 8    | 0 | 1 | 98 Room Air      | 99.7  |
| 1 | 12.3 | 1 | 2 | 88 Room Air      | 100.4 |
| 1 | 5.9  | 0 | 1 | 95 Room Air      | 100.2 |
| 3 | 3.8  | 1 | 4 | 98 Room Air      | 103.1 |
| 2 | 11.8 | 0 | 2 | 91 Room Air      | 103   |
| 2 | 6    | 0 | 2 | 90 Room Air      | 101.3 |
| 2 | 12.1 | 1 | 3 | 94 Room Air      | 103.1 |
| 4 | 14   | 1 | 4 | 92 Room Air      | 100.7 |
| 3 | 13.2 | 1 | 4 | 91 Room Air      | 102.6 |
| 4 | 10.3 | 0 | 3 | 90 Non-Rebreath  | 103.1 |
| 1 | 9.8  | 0 | 1 | 98 Room Air      | 102.8 |
| 2 | 9    | 0 | 2 | 87 Room Air      | 99.5  |
| 1 | 6.1  | 0 | 1 | 98 Room Air      | 100.9 |
| 2 | 6.1  | 0 | 2 | 90 Room Air      | 99.5  |
| 3 | 8.1  | 0 | 2 | 95 Room Air      | 103.1 |
| 2 | 8.1  | 0 | 2 | 90 Room Air      | 100.6 |
| 2 | 4.7  | 0 | 1 | 97 Nasal Cannul  | 98.7  |
| 3 | 7.8  | 0 | 3 | 93 Room Air      | 103.2 |
| 2 | 14.1 | 1 | 3 | 90 Nasal Cannul  | 99.4  |
| 4 | 16.8 | 1 | 4 | 77 Nasal Cannul  | 104.6 |
| 3 | 6.3  | 0 | 2 | 84 Room Air      | 102.5 |
| 1 | 2.5  | 1 | 1 | 100 Room Air     | 99.1  |
| 3 | 5.7  | 0 | 3 | 95 Room Air      | 100   |
| 2 | 7.1  | 0 | 2 | 94 Room Air      | 100.6 |
| 3 | 8.7  | 0 | 2 | 90 Room Air      | 99.1  |
| 2 | 8.1  | 0 | 2 | 98 Room Air      | 100.1 |
| 3 | 3.4  | 1 | 3 | 91 Room Air      | 102.8 |
| 2 | 8.4  | 0 | 2 | 99 Room Air      | 99.4  |
| 3 | 7.1  | 0 | 3 | 76 Room Air      | 102.6 |

|      |      |   |   |                  |       |
|------|------|---|---|------------------|-------|
| 1    | 4.2  | 0 | 1 | 95 Room Air      | 100.8 |
| 1    | 6    | 0 | 1 | 98 Room Air      | 98.7  |
| 2    | 15.7 | 1 | 3 | 84 Nasal Cannul  | 101.8 |
| 3    | 8.4  | 0 | 3 | 94 Room Air      | 101   |
| 4    | 18.5 | 1 | 4 | 56 Non-Rebreat   | 103.5 |
| 2    | 17.4 | 1 | 2 | 96 Room Air      | 101.4 |
| 1    | 6.4  | 0 | 1 | 89 Nasal Cannul  | 98.7  |
| 0    | 5.5  | 0 | 0 | 97 Room Air      | 98.7  |
| 1    | 9.8  | 0 | 1 | 99 Room Air      | 98.5  |
| 3    | 6.8  | 0 | 3 | 95 Nasal Cannul  | 101   |
| 2    | 4.1  | 0 | 1 | 95 Room Air      | 101.5 |
| 2    | 4.5  | 0 | 1 | 98 Room Air      | 103.4 |
| 2    | 1.5  | 1 | 2 | 97 Non-Rebreat   | 98.5  |
| 2    | 11.3 | 0 | 1 | 98 Room Air      | 102.8 |
| 3    | 7.2  | 0 | 2 | 95 Room Air      | 99.6  |
| 2    | 15.7 | 1 | 3 | 93 Non-Rebreat   | 98.9  |
| 0    | 9    | 0 | 0 | 75 Nasal Cannul  | 100.4 |
| 1    | 3.8  | 1 | 1 | 98 Room Air      | 101.5 |
| 3    | 4    | 1 | 3 | 99 Nasal Cannul  | 101.5 |
| 3    | 12.3 | 1 | 3 | 100 Room Air     | 98.5  |
| 1    | 14.1 | 1 | 2 | 98 Room Air      | 101   |
| 2    | 8.8  | 0 | 2 | 91 Room Air      | 100.1 |
| 1    | 7.4  | 0 | 1 | 92 Room Air      | 99.2  |
| 3    | 14.4 | 1 | 4 | 100 Nasal Cannul | 102.9 |
| 2    | 6.7  | 0 | 2 | 87 Room Air      | 102.3 |
| 1    | 8.2  | 0 | 1 | 90 Room Air      | 100.8 |
| 1    | 8.4  | 0 | 1 | 87 Room Air      | 103.6 |
| 2    | 8    | 0 | 2 | 92 Non-Rebreat   | 100.5 |
| 3    | 12.7 | 1 | 3 | 91 Nasal Cannul  | 100.4 |
| 2    | 8.2  | 0 | 2 | 94 Room Air      | 102.8 |
| 2 NA |      | 1 | 2 | 94 Room Air      | 98.9  |
| 3    | 10.6 | 0 | 3 | 96 Room Air      | 103   |
| 1    | 4.8  | 0 | 1 | 100 Non-Rebreat  | 103   |
| 3    | 11.7 | 0 | 2 | 94 Room Air      | 101.3 |
| 1    | 13.1 | 1 | 2 | 100 Room Air     | 99.6  |
| 2    | 10.8 | 0 | 2 | 80 Room Air      | 99.5  |
| 3    | 7.1  | 0 | 3 | 93 Non-Rebreat   | 102.2 |
| 2    | 6.5  | 0 | 2 | 88 Non-Rebreat   | 104   |
| 2    | 26.5 | 1 | 2 | 82 Non-Rebreat   | 99    |
| 2    | 7.1  | 0 | 2 | 91 Room Air      | 101.2 |
| 1    | 3.8  | 1 | 1 | 84 Room Air      | 101.1 |
| 3    | 6    | 0 | 2 | 96 Room Air      | 102.2 |
| 2    | 6.8  | 0 | 2 | 99 Room Air      | 102   |
| 0    | 13.2 | 1 | 1 | 90 Nasal Cannul  | 100.9 |
| 2    | 8.5  | 0 | 2 | 93 Room Air      | 100.5 |



|    |      |    |      |                 |       |
|----|------|----|------|-----------------|-------|
| 4  | 18.4 | 1  | 4    | 96 Non-Rebreat  | 103.5 |
| 2  | 11   | 0  | 2    | 96 Non-Rebreat  | 99.1  |
| 2  | 8.4  | 0  | 2    | 92 Room Air     | 99    |
| 2  | 7.1  | 0  | 2    | 91 Room Air     | 101.7 |
| 1  | 10.3 | 0  | 1    | 99 Room Air     | 98.8  |
| 2  | 3.3  | 1  | 2    | 87 Room Air     | 99.4  |
| 1  | 5.6  | 0  | 1    | 96 Room Air     | 102.2 |
| 2  | 5.7  | 0  | 2    | 93 Nasal Cannul | 102.8 |
| 2  | 16   | 1  | 3 NA | NPPV            | 97.9  |
| 1  | 5.3  | 0  | 1    | 95 Nasal Cannul | 99.8  |
| 2  | 5.3  | 0  | 2    | 100 Non-Rebreat | 100.1 |
| 2  | 4.8  | 0  | 1    | 98 Room Air     | 101   |
| 1  | 14   | 1  | 1    | 97 Room Air     | 98.2  |
| 3  | 7.4  | 0  | 3    | 95 Nasal Cannul | 102.1 |
| 1  | 11.9 | 0  | 1    | 100 Ventilator  | 99.2  |
| 3  | 13   | 1  | 3    | 88 Ventilator   | 100.3 |
| 2  | 10.7 | 0  | 2    | 92 Ventilator   | 101.1 |
| 3  | 20.5 | 1  | 3    | 85 Non-Rebreat  | 99.3  |
| 0  | 6    | 0  | 0    | 95 Non-Rebreat  | 103.4 |
| 3  | 5.5  | 0  | 2    | 92 Nasal Cannul | 104.3 |
| 2  | 4.1  | 0  | 2    | 92 Nasal Cannul | 101.9 |
| 0  | 10.8 | 0  | 0    | 93 Room Air     | 99.5  |
| 3  | 13.7 | 1  | 3    | 90 Ventilator   | 103.6 |
| 1  | 8.7  | 0  | 1    | 100 Room Air    | 98.4  |
| 2  | 6.2  | 0  | 2    | 93 Room Air     | 101.5 |
| 2  | 10.7 | 0  | 2    | 93 Nasal Cannul | 99.1  |
| 0  | 6.1  | 0  | 0    | 97 Nasal Cannul | 102.6 |
| 1  | 3.1  | 1  | 1    | 97 Room Air     | 98.7  |
| 4  | 1.9  | 1  | 4    | 99 Room Air     | 102.6 |
| 4  | 10.3 | 0  | 3    | 93 Non-Rebreat  | 100.5 |
| 1  | 4.2  | 0  | 0    | 99 Room Air     | 98.6  |
| 3  | 13.1 | 1  | 3    | 96 Room Air     | 104   |
| 1  | 5.8  | 0  | 1    | 74 Non-Rebreat  | 97.9  |
| 2  | 3.4  | 1  | 2    | 93 Room Air     | 102.8 |
| 1  | 6.6  | 0  | 1    | 98 Room Air     | 99.9  |
| 2  | 9.2  | 0  | 2    | 97 Room Air     | 100.9 |
| NA | NA   | NA | NA   | 97 Room Air     | 101   |
| 1  | 6.3  | 0  | 1    | 91 Room Air     | 100.3 |
| 2  | 5.9  | 0  | 2    | 92 Room Air     | 103.5 |
| 4  | 8.6  | 0  | 3    | 81 Room Air     | 103.5 |
| 2  | 6.6  | 0  | 2    | 86 Room Air     | 105.6 |
| 3  | 14.4 | 1  | 3    | 97 Room Air     | 102.6 |
| 1  | 12.4 | 1  | 1    | 92 Room Air     | 100   |
| 2  | 7.2  | 0  | 2    | 90 Room Air     | 99.1  |
| 3  | 17.7 | 1  | 3    | 96 Room Air     | 101.1 |

|   |      |   |   |                  |       |
|---|------|---|---|------------------|-------|
| 1 | 14.6 | 1 | 2 | 91 Room Air      | 99.6  |
| 2 | 8.6  | 0 | 2 | 100 Room Air     | 100.2 |
| 0 | 9.4  | 0 | 0 | 90 Room Air      | 102   |
| 3 | 3.7  | 1 | 3 | 95 Room Air      | 101.5 |
| 3 | 3.4  | 1 | 3 | 92 Room Air      | 102.7 |
| 0 | 5.4  | 0 | 0 | 92 Room Air      | 99.5  |
| 2 | 2.7  | 1 | 2 | 77 Room Air      | 98.7  |
| 2 | 18.6 | 1 | 2 | 94 Room Air      | 99.2  |
| 0 | 6.9  | 0 | 0 | 95 Nasal Cannul  | 102.2 |
| 1 | 13.8 | 1 | 2 | 96 Room Air      | 98.6  |
| 2 | 15.1 | 1 | 3 | 88 Room Air      | 100.4 |
| 2 | 6    | 0 | 2 | 92 Room Air      | 102.9 |
| 0 | 5.4  | 0 | 0 | 96 Room Air      | 101.2 |
| 2 | 8    | 0 | 2 | 94 Nasal Cannul  | 98.9  |
| 0 | 9.5  | 0 | 0 | 98 Nasal Cannul  | 98.6  |
| 2 | 5.7  | 0 | 2 | 95 Room Air      | 103.1 |
| 2 | 5.3  | 0 | 1 | 96 Room Air      | 99.5  |
| 3 | 4.7  | 0 | 2 | 93 Nasal Cannul  | 102.2 |
| 2 | 11.1 | 0 | 2 | 91 Non-Rebreat   | 102.5 |
| 1 | 4.8  | 0 | 1 | 99 Room Air      | 102.9 |
| 2 | 3.8  | 1 | 2 | 90 Room Air      | 103.1 |
| 2 | 4.2  | 0 | 2 | 90 Room Air      | 100.1 |
| 3 | 14.6 | 1 | 3 | 95 Non-Rebreat   | 103.4 |
| 3 | 8.5  | 0 | 3 | 97 Room Air      | 103   |
| 0 | 13.2 | 1 | 1 | 94 Room Air      | 102.6 |
| 4 | 11.9 | 0 | 3 | 96 Room Air      | 103.1 |
| 3 | 9    | 0 | 3 | 97 Non-Rebreat   | 104   |
| 2 | 12.9 | 1 | 3 | 89 Room Air      | 101   |
| 0 | 5.3  | 0 | 0 | 92 Room Air      | 100.8 |
| 1 | 10.4 | 0 | 1 | 94 Room Air      | 100   |
| 3 | 7    | 0 | 3 | 93 Room Air      | 103.2 |
| 1 | 6.5  | 0 | 1 | 88 Room Air      | 102.8 |
| 2 | 8.6  | 0 | 1 | 96 Room Air      | 101.2 |
| 4 | 18.3 | 1 | 4 | 94 Non-Rebreat   | 106   |
| 1 | 9.4  | 0 | 1 | 95 Room Air      | 99.6  |
| 2 | 12.1 | 1 | 2 | 99 Nasal Cannul  | 101.3 |
| 1 | 2.8  | 1 | 1 | 96 Room Air      | 101.1 |
| 2 | 7.3  | 0 | 2 | 94 Room Air      | 103.4 |
| 1 | 5.5  | 0 | 1 | 90 Nasal Cannul  | 99    |
| 2 | 13.2 | 1 | 3 | 84 Nasal Cannul  | 100.4 |
| 2 | 5.9  | 0 | 2 | 96 Room Air      | 101.7 |
| 1 | 5.8  | 0 | 1 | 100 Nasal Cannul | 101.5 |
| 1 | 5.1  | 0 | 1 | 93 Nasal Cannul  | 98.9  |
| 2 | 7.4  | 0 | 2 | 100 Non-Rebreat  | 99.5  |
| 0 | 9.1  | 0 | 0 | 100 Room Air     | 98.9  |

|      |      |   |   |                  |       |
|------|------|---|---|------------------|-------|
| 2    | 8.1  | 0 | 2 | 88 Room Air      | 102.8 |
| 2    | 8.7  | 0 | 2 | 100 Room Air     | 100.7 |
| 1    | 4.2  | 0 | 0 | 97 Room Air      | 100.4 |
| 1    | 8.1  | 0 | 1 | 92 Room Air      | 103   |
| 2    | 11.1 | 0 | 1 | 93 Non-Rebreath  | 97.4  |
| 3    | 7.9  | 0 | 2 | 91 Room Air      | 100.3 |
| 2    | 13.7 | 1 | 3 | 91 Room Air      | 101.3 |
| 3    | 13.6 | 1 | 3 | 84 Non-Rebreath  | 103   |
| 2    | 6.9  | 0 | 2 | 96 Room Air      | 102.7 |
| 3    | 13.8 | 1 | 3 | 60 Room Air      | 100.4 |
| 2    | 9.5  | 0 | 2 | 94 Nasal Cannul  | 102.3 |
| 2    | 9.8  | 0 | 2 | 79 Room Air      | 102.7 |
| 2    | 6.7  | 0 | 2 | 92 Room Air      | 105.5 |
| 1    | 6.6  | 0 | 1 | 99 Nasal Cannul  | 99.4  |
| 1    | 4.2  | 0 | 1 | 90 Room Air      | 100.2 |
| 3    | 14.9 | 1 | 3 | 97 Room Air      | 104.3 |
| 2    | 7.7  | 0 | 2 | 99 Room Air      | 98.6  |
| 0    | 5.8  | 0 | 0 | 97 Nasal Cannul  | 102   |
| 0    | 6.4  | 0 | 0 | 97 Room Air      | 103   |
| 2    | 5.8  | 0 | 1 | 100 Nasal Cannul | 98.2  |
| 1    | 11.6 | 0 | 1 | 91 Room Air      | 99.3  |
| 2    | 9    | 0 | 2 | 96 Room Air      | 100.8 |
| 1    | 7    | 0 | 1 | 88 Room Air      | 100   |
| 2    | 13   | 1 | 2 | 97 Non-Rebreath  | 103.2 |
| 1    | 5.7  | 0 | 1 | 97 Room Air      | 103.1 |
| 1 NA |      | 1 | 1 | 100 Room Air     | 98.3  |
| 3    | 12.1 | 1 | 3 | 89 Room Air      | 103   |
| 2    | 5.7  | 0 | 2 | 95 Nasal Cannul  | 100.9 |
| 3    | 7.5  | 0 | 3 | 86 Room Air      | 102.6 |
| 2    | 10.7 | 0 | 2 | 88 Room Air      | 104.2 |
| 2    | 6.7  | 0 | 2 | 92 Room Air      | 104.2 |
| 1    | 6.2  | 0 | 1 | 94 Room Air      | 103.2 |
| 1    | 6.8  | 0 | 1 | 95 Nasal Cannul  | 98.6  |
| 2    | 6.2  | 0 | 2 | 85 Room Air      | 102.2 |
| 2    | 11.1 | 0 | 2 | 91 Non-Rebreath  | 101.5 |
| 3    | 5.2  | 0 | 2 | 82 Non-Rebreath  | 102.8 |
| 2    | 9.5  | 0 | 2 | 93 Room Air      | 98.9  |
| 2    | 8.9  | 0 | 2 | 91 Room Air      | 100.1 |
| 2    | 4.8  | 0 | 2 | 99 Room Air      | 98.3  |
| 3    | 14.3 | 1 | 4 | 85 Non-Rebreath  | 102   |
| 2    | 4.7  | 0 | 2 | 92 Room Air      | 100.3 |
| 0    | 8.5  | 0 | 0 | 99 Room Air      | 99.3  |
| 0    | 6    | 0 | 0 | 95 Room Air      | 98.7  |
| 2    | 7    | 0 | 2 | 91 Room Air      | 100.9 |
| 4    | 4.4  | 0 | 3 | 88 Room Air      | 103.1 |

|   |      |   |   |                  |       |
|---|------|---|---|------------------|-------|
| 1 | 11.7 | 0 | 1 | 97 Room Air      | 100.4 |
| 1 | 9.7  | 0 | 1 | 98 Ventilator    | 100.9 |
| 0 | 6.1  | 0 | 0 | 98 Room Air      | 103.8 |
| 1 | 8    | 0 | 1 | 98 Room Air      | 102.5 |
| 2 | 11.6 | 0 | 1 | 89 Room Air      | 99.7  |
| 2 | 4.3  | 0 | 1 | 94 Room Air      | 103.6 |
| 2 | 5.6  | 0 | 1 | 99 Room Air      | 99.7  |
| 4 | 12.1 | 1 | 4 | 99 Ventilator    | 105.3 |
| 2 | 9.2  | 0 | 2 | 99 Room Air      | 103   |
| 1 | 7.8  | 0 | 1 | 91 Room Air      | 101.4 |
| 3 | 12.7 | 1 | 3 | 82 Room Air      | 100.5 |
| 2 | 5.6  | 0 | 2 | 99 Room Air      | 103.1 |
| 1 | 6.2  | 0 | 1 | 99 Room Air      | 98.6  |
| 3 | 3.5  | 1 | 3 | 100 Nasal Cannul | 101.8 |
| 2 | 10.3 | 0 | 2 | 99 Room Air      | 100.9 |
| 1 | 8.9  | 0 | 1 | 84 Room Air      | 101.4 |
| 1 | 3.6  | 1 | 1 | 95 Room Air      | 98.8  |
| 1 | 25.1 | 1 | 1 | 96 Room Air      | 99.6  |
| 1 | 7.8  | 0 | 1 | 99 Room Air      | 100   |
| 3 | 15.7 | 1 | 3 | 97 Room Air      | 99.8  |
| 2 | 9.3  | 0 | 2 | 100 Room Air     | 99.8  |
| 2 | 15.5 | 1 | 2 | 100 Room Air     | 98.9  |
| 2 | 8.9  | 0 | 1 | 90 Nasal Cannul  | 103.1 |
| 3 | 19   | 1 | 3 | 92 Nasal Cannul  | 100.5 |
| 1 | 5.5  | 0 | 1 | 95 Room Air      | 99.4  |
| 2 | 5.9  | 0 | 2 | 93 Room Air      | 102.8 |
| 0 | 11   | 0 | 0 | 95 Room Air      | 100.4 |
| 3 | 8.5  | 0 | 3 | 96 Room Air      | 100.5 |
| 2 | 9.1  | 0 | 2 | 94 Nasal Cannul  | 100.3 |
| 1 | 6.7  | 0 | 1 | 92 Nasal Cannul  | 102.2 |
| 2 | 18.8 | 1 | 2 | 96 Room Air      | 99.4  |
| 1 | 9.4  | 0 | 1 | 98 Room Air      | 98.7  |
| 2 | 10.9 | 0 | 2 | 78 Room Air      | 99.6  |
| 1 | 9.2  | 0 | 1 | 95 Non-Rebreat   | 99    |
| 1 | 7.6  | 0 | 1 | 77 Room Air      | 100.5 |
| 1 | 10.1 | 0 | 1 | 96 Room Air      | 99.3  |
| 1 | 13.3 | 1 | 2 | 98 Nasal Cannul  | 99.3  |
| 2 | 5.9  | 0 | 2 | 88 Room Air      | 105.9 |
| 2 | 5.8  | 0 | 1 | 90 Room Air      | 99.4  |
| 3 | 20.2 | 1 | 4 | 99 Room Air      | 102.5 |
| 2 | 7.5  | 0 | 2 | 87 Room Air      | 99.3  |
| 1 | 6.4  | 0 | 1 | 92 Room Air      | 101.5 |
| 1 | 13.2 | 1 | 2 | 96 Room Air      | 100   |
| 1 | 17.7 | 1 | 2 | 99 Room Air      | 98.9  |
| 0 | 11.3 | 0 | 0 | 100 Room Air     | 100   |

|   |      |   |   |                 |       |
|---|------|---|---|-----------------|-------|
| 1 | 8.5  | 0 | 1 | 94 Room Air     | 103.6 |
| 1 | 4.9  | 0 | 1 | 91 Room Air     | 101   |
| 1 | 6.3  | 0 | 1 | 99 Nasal Cannul | 99.9  |
| 3 | 10.6 | 0 | 2 | 92 Room Air     | 101.1 |
| 3 | 4.4  | 0 | 2 | 96 Room Air     | 102.6 |
| 3 | 3.7  | 1 | 3 | 92 Room Air     | 103.1 |
| 1 | 15.2 | 1 | 1 | 99 Room Air     | 101.5 |

|     |       |       |              |   |
|-----|-------|-------|--------------|---|
| 106 | 27 NA | 91 NA | Nasal Cannul | 0 |
| 122 | 20 NA | 99 NA | Room Air     | 0 |
| 136 | 20 NA | 93 NA | Room Air     | 0 |
| 100 | 18 NA | 96 NA | Room Air     | 0 |
| 88  | 40 NA | 91 NA | Nasal Cannul | 0 |
| 126 | 48 NA | 75 NA | High-Flow    | 5 |
| 110 | 25 NA | 89 NA | Non-Rebreat  | 5 |
| 74  | 32 NA | 83 NA | Nasal Cannul | 0 |
| 131 | 28 NA | 92 NA | Nasal Cannul | 0 |
| 119 | 32 NA | 93 NA | Room Air     | 0 |
| 106 | 22 NA | 94 NA | Room Air     | 0 |
| 97  | 28 NA | 75 NA | Non-Rebreat  | 5 |
| 126 | 52 NA | 98 NA | Ventilator   | 5 |
| 107 | 36 NA | 86 NA | Venti Mask   | 5 |
| 104 | 28 NA | 93 NA | Nasal Cannul | 0 |
| 100 | 36 NA | 91 NA | Venti Mask   | 5 |
| 130 | 30 NA | 92 NA | Nasal Cannul | 0 |
| 132 | 28 NA | 90 NA | Nasal Cannul | 0 |
| 100 | 26 NA | 92 NA | Nasal Cannul | 0 |
| 145 | 40 NA | 82 NA | Ventilator   | 5 |
| 109 | 34 NA | 86 NA | Nasal Cannul | 0 |
| 140 | 49 NA | 13 NA | Ventilator   | 5 |
| 115 | 35 NA | 80 NA | NIPPV (CPAP  | 5 |
| 105 | 26 NA | 88 NA | Venti Mask   | 5 |
| 118 | 26 NA | 82 NA | Room Air     | 0 |
| 93  | 22 NA | 94 NA | Room Air     | 0 |
| 125 | 42 NA | 90 NA | Ventilator   | 5 |
| 133 | 40 NA | 8 NA  | Non-Rebreat  | 5 |
| 147 | 48 NA | 86 NA | Ventilator   | 5 |
| 87  | 18 NA | 97 NA | Room Air     | 0 |
| 112 | 28 NA | 92 NA | Nasal Cannul | 0 |
| 86  | 20 NA | 97 NA | Room Air     | 0 |
| 100 | 40 NA | 85 NA | Non-Rebreat  | 5 |
| 112 | 24 NA | 92 NA | Venti Mask   | 5 |
| 140 | 48 NA | 18 NA | Ventilator   | 5 |
| 130 | 28 NA | 88 NA | Nasal Cannul | 0 |
| 115 | 32 NA | 90 NA | Nasal Cannul | 0 |
| 97  | 24 NA | 87 NA | Nasal Cannul | 0 |
| 125 | 44 NA | 65 NA | High-Flow    | 5 |
| 127 | 40 NA | 77 NA | Non-Rebreat  | 5 |
| 99  | 24 NA | 86 NA | Nasal Cannul | 0 |
| 104 | 20 NA | 94 NA | Room Air     | 0 |
| 91  | 24 NA | 88 NA | Nasal Cannul | 0 |
| 104 | 34 NA | 83 NA | Room Air     | 0 |
| 96  | 26 NA | 86 NA | Nasal Cannul | 0 |

|     |       |        |              |   |
|-----|-------|--------|--------------|---|
| 71  | 24 NA | 97 NA  | Room Air     | 0 |
| 98  | 34 NA | 85 NA  | Nasal Cannul | 0 |
| 79  | 20 NA | 92 NA  | Room Air     | 0 |
| 154 | 36 NA | 91 NA  | Non-Rebreat  | 5 |
| 91  | 28 NA | 92 NA  | Nasal Cannul | 0 |
| 84  | 20 NA | 98 NA  | Nasal Cannul | 0 |
| 154 | 22 NA | 94 NA  | Room Air     | 0 |
| 119 | 60 NA | 99 NA  | NIPPV (CPAP  | 5 |
| 83  | 36 NA | 82 NA  | Nasal Cannul | 0 |
| 102 | 26 NA | 100 NA | Nasal Cannul | 0 |
| 89  | 28 NA | 89 NA  | Nasal Cannul | 0 |
| 143 | 22 NA | 96 NA  | Room Air     | 0 |
| 153 | 58 NA | 61 NA  | Ventilator   | 5 |
| 86  | 18 NA | 80 NA  | Room Air     | 0 |
| 118 | 41 NA | 78 NA  | NIPPV (CPAP  | 5 |
| 157 | 50 NA | 95 NA  | NIPPV (CPAP  | 5 |
| 82  | 28 NA | 86 NA  | Nasal Cannul | 0 |
| 153 | 34 NA | 82 NA  | NIPPV (CPAP  | 5 |
| 100 | 20 NA | 96 NA  | Room Air     | 0 |
| 98  | 30 NA | 87 NA  | Nasal Cannul | 0 |
| 113 | 38 NA | 84 NA  | Nasal Cannul | 0 |
| 189 | 63 NA | 83 NA  | NIPPV (CPAP  | 5 |
| 140 | 48 NA | 60 NA  | Ventilator   | 5 |
| 112 | 28 NA | 93 NA  | Room Air     | 0 |
| 120 | 34 NA | 82 NA  | Venti Mask   | 5 |
| 92  | 39 NA | 92 NA  | Venti Mask   | 5 |
| 108 | 25 NA | 82 NA  | Nasal Cannul | 0 |
| 138 | 33 NA | 92 NA  | Room Air     | 0 |
| 98  | 24 NA | 93 NA  | High-Flow    | 5 |
| 100 | 43 NA | 63 NA  | Ventilator   | 5 |
| 98  | 24 NA | 92 NA  | Room Air     | 0 |
| 134 | 20 NA | 96 NA  | Room Air     | 0 |
| 96  | 40 NA | 88 NA  | Non-Rebreat  | 5 |
| 136 | 38 NA | 39 NA  | Ventilator   | 5 |
| 139 | 25 NA | 91 NA  | Room Air     | 0 |
| 144 | 24 NA | 92 NA  | Nasal Cannul | 0 |
| 157 | 35 NA | 79 NA  | NIPPV (CPAP  | 5 |
| 161 | 71 NA | 47 NA  | Ventilator   | 5 |
| 88  | 38 NA | 90 NA  | Nasal Cannul | 0 |
| 95  | 28 NA | 93 NA  | Room Air     | 0 |
| 135 | 26 NA | 92 NA  | Nasal Cannul | 0 |
| 85  | 20 NA | 94 NA  | Room Air     | 0 |
| 115 | 30 NA | 86 NA  | Nasal Cannul | 0 |
| 120 | 36 NA | 67 NA  | High-Flow    | 5 |
| 96  | 32 NA | 91 NA  | Non-Rebreat  | 5 |

|     |       |        |              |   |
|-----|-------|--------|--------------|---|
| 116 | 40 NA | 93 NA  | Nasal Cannul | 0 |
| 126 | 52 NA | 80 NA  | Ventilator   | 5 |
| 113 | 40 NA | 86 NA  | NIPPV (CPAP  | 5 |
| 67  | 30 NA | 92 NA  | Nasal Cannul | 0 |
| 124 | 32 NA | 88 NA  | Nasal Cannul | 0 |
| 97  | 40 NA | 86 NA  | Nasal Cannul | 0 |
| 105 | 34 NA | 89 NA  | Nasal Cannul | 0 |
| 120 | 36 NA | 86 NA  | Non-Rebreat  | 5 |
| 117 | 26 NA | 93 NA  | Room Air     | 0 |
| 89  | 40 NA | 90 NA  | Venti Mask   | 5 |
| 97  | 20 NA | 95 NA  | Room Air     | 0 |
| 72  | 20 NA | 96 NA  | Room Air     | 0 |
| 85  | 26 NA | 85 NA  | Nasal Cannul | 0 |
| 100 | 40 NA | 77 NA  | NIPPV (CPAP  | 5 |
| 95  | 19 NA | 95 NA  | Room Air     | 0 |
| 88  | 22 NA | 91 NA  | Nasal Cannul | 0 |
| 69  | 22 NA | 89 NA  | Nasal Cannul | 0 |
| 98  | 22 NA | 95 NA  | Room Air     | 0 |
| 137 | 45 NA | 87 NA  | High-Flow    | 5 |
| 97  | 26 NA | 94 NA  | Nasal Cannul | 0 |
| 105 | 20 NA | 99 NA  | Nasal Cannul | 0 |
| 76  | 30 NA | 95 NA  | Room Air     | 0 |
| 113 | 55 NA | 87 NA  | NIPPV (CPAP  | 5 |
| 108 | 34 NA | 99 NA  | Non-Rebreat  | 5 |
| 102 | 30 NA | 99 NA  | Room Air     | 0 |
| 80  | 26 NA | 98 NA  | Room Air     | 0 |
| 137 | 55 NA | 74 NA  | Ventilator   | 5 |
| 128 | 22 NA | 93 NA  | Nasal Cannul | 0 |
| 108 | 28 NA | 88 NA  | Nasal Cannul | 0 |
| 103 | 42 NA | 65 NA  | Non-Rebreat  | 5 |
| 121 | 58 NA | 3 NA   | Ventilator   | 5 |
| 88  | 30 NA | 75 NA  | Nasal Cannul | 0 |
| 123 | 40 NA | 87 NA  | NIPPV (CPAP  | 5 |
| 102 | 20 NA | 91 NA  | Room Air     | 0 |
| 112 | 28 NA | 99 NA  | Room Air     | 0 |
| 96  | 22 NA | 94 NA  | Room Air     | 0 |
| 103 | 28 NA | 93 NA  | Room Air     | 0 |
| 81  | 20 NA | 96 NA  | Room Air     | 0 |
| 127 | 52 NA | 88 NA  | Ventilator   | 5 |
| 91  | 26 NA | 90 NA  | Nasal Cannul | 0 |
| 99  | 36 NA | 84 NA  | Ventilator   | 5 |
| 105 | 28 NA | 91 NA  | Nasal Cannul | 0 |
| 115 | 26 NA | 80 NA  | Nasal Cannul | 0 |
| 105 | 27 NA | 98 NA  | Nasal Cannul | 0 |
| 98  | 40 NA | 100 NA | Nasal Cannul | 0 |



|     |       |       |              |   |
|-----|-------|-------|--------------|---|
| 120 | 35 NA | 93 NA | Room Air     | 0 |
| 106 | 24 NA | 96 NA | Room Air     | 0 |
| 113 | 28 NA | 91 NA | Nasal Cannul | 0 |
| 116 | 40 NA | 92 NA | Non-Rebreat  | 5 |
| 102 | 22 NA | 92 NA | Venti Mask   | 5 |
| 116 | 40 NA | 87 NA | Non-Rebreat  | 5 |
| 110 | 30 NA | 75 NA | Non-Rebreat  | 5 |
| 122 | 28 NA | 87 NA | Non-Rebreat  | 5 |
| 92  | 28 NA | 90 NA | Nasal Cannul | 0 |
| 133 | 24 NA | 92 NA | Room Air     | 0 |
| 172 | 28 NA | 94 NA | Nasal Cannul | 0 |
| 99  | 36 NA | 89 NA | Nasal Cannul | 0 |
| 92  | 28 NA | 84 NA | Non-Rebreat  | 5 |
| 149 | 73 NA | 30 NA | Ventilator   | 5 |
| 107 | 24 NA | 90 NA | Nasal Cannul | 0 |
| 178 | 48 NA | 65 NA | Ventilator   | 5 |
| 117 | 27 NA | 94 NA | Nasal Cannul | 0 |
| 106 | 24 NA | 77 NA | Nasal Cannul | 0 |
| 139 | 41 NA | 86 NA | NIPPV (CPAP  | 5 |
| 87  | 32 NA | 90 NA | Nasal Cannul | 0 |
| 121 | 36 NA | 80 NA | Nasal Cannul | 0 |
| 105 | 32 NA | 86 NA | Nasal Cannul | 0 |
| 87  | 24 NA | 92 NA | Room Air     | 0 |
| 86  | 36 NA | 89 NA | NIPPV (CPAP  | 5 |
| 128 | 41 NA | 72 NA | NIPPV (CPAP  | 5 |
| 80  | 22 NA | 85 NA | Nasal Cannul | 0 |
| 178 | 34 NA | 60 NA | Non-Rebreat  | 5 |
| 109 | 22 NA | 93 NA | Nasal Cannul | 0 |
| 96  | 26 NA | 97 NA | Room Air     | 0 |
| 122 | 25 NA | 0 NA  | Non-Rebreat  | 5 |
| 91  | 22 NA | 94 NA | Nasal Cannul | 0 |
| 80  | 18 NA | 97 NA | Nasal Cannul | 0 |
| 116 | 26 NA | 91 NA | Room Air     | 0 |
| 98  | 26 NA | 88 NA | Nasal Cannul | 0 |
| 145 | 90 NA | 89 NA | Ventilator   | 5 |
| 147 | 40 NA | 86 NA | NIPPV (CPAP  | 5 |
| 117 | 48 NA | 81 NA | NIPPV (CPAP  | 5 |
| 134 | 44 NA | 80 NA | Non-Rebreat  | 5 |
| 120 | 25 NA | 93 NA | Room Air     | 0 |
| 131 | 24 NA | 92 NA | Room Air     | 0 |
| 109 | 24 NA | 92 NA | Nasal Cannul | 0 |
| 100 | 22 NA | 97 NA | Room Air     | 0 |
| 72  | 24 NA | 90 NA | Nasal Cannul | 0 |
| 107 | 35 NA | 91 NA | Nasal Cannul | 0 |
| 130 | 44 NA | 74 NA | Non-Rebreat  | 5 |

|     |       |       |              |   |
|-----|-------|-------|--------------|---|
| 128 | 27 NA | 92 NA | Nasal Cannul | 0 |
| 124 | 28 NA | 95 NA | Nasal Cannul | 0 |
| 108 | 25 NA | 95 NA | Room Air     | 0 |
| 74  | 18 NA | 98 NA | Room Air     | 0 |
| 80  | 20 NA | 96 NA | Room Air     | 0 |
| 110 | 22 NA | 91 NA | Nasal Cannul | 0 |
| 156 | 92 NA | 7 NA  | Ventilator   | 5 |
| 76  | 20 NA | 84 NA | Nasal Cannul | 0 |
| 87  | 26 NA | 93 NA | Nasal Cannul | 0 |
| 154 | 97 NA | 72 NA | Ventilator   | 5 |
| 120 | 45 NA | 76 NA | Non-Rebreat  | 5 |
| 109 | 49 NA | 88 NA | Ventilator   | 5 |
| 96  | 25 NA | 93 NA | Room Air     | 0 |
| 132 | 56 NA | 78 NA | Ventilator   | 5 |
| 142 | 20 NA | 95 NA | Room Air     | 0 |
| 108 | 22 NA | 96 NA | Room Air     | 0 |
| 91  | 30 NA | 94 NA | Nasal Cannul | 0 |
| 87  | 28 NA | 73 NA | Nasal Cannul | 0 |
| 91  | 19 NA | 95 NA | Room Air     | 0 |
| 102 | 26 NA | 86 NA | Nasal Cannul | 0 |
| 140 | 24 NA | 94 NA | Nasal Cannul | 0 |
| 113 | 37 NA | 85 NA | Nasal Cannul | 0 |
| 190 | 48 NA | 51 NA | Ventilator   | 5 |
| 65  | 22 NA | 92 NA | Nasal Cannul | 0 |
| 94  | 44 NA | 86 NA | Nasal Cannul | 0 |
| 99  | 26 NA | 91 NA | Nasal Cannul | 0 |
| 144 | 50 NA | 45 NA | Ventilator   | 5 |
| 132 | 28 NA | 92 NA | Nasal Cannul | 0 |
| 160 | 60 NA | 6 NA  | Ventilator   | 5 |
| 180 | 58 NA | 9 NA  | Ventilator   | 5 |
| 126 | 37 NA | 91 NA | Non-Rebreat  | 5 |
| 100 | 40 NA | 84 NA | Ventilator   | 5 |
| 136 | 38 NA | 88 NA | NIPPV (CPAP  | 5 |
| 96  | 20 NA | 95 NA | Nasal Cannul | 0 |
| 111 | 40 NA | 89 NA | Nasal Cannul | 0 |
| 75  | 20 NA | 91 NA | Room Air     | 0 |
| 108 | 27 NA | 91 NA | Room Air     | 0 |
| 130 | 40 NA | 90 NA | Nasal Cannul | 0 |
| 117 | 28 NA | 85 NA | Nasal Cannul | 0 |
| 97  | 24 NA | 89 NA | Nasal Cannul | 0 |
| 99  | 26 NA | 91 NA | Room Air     | 0 |
| 163 | 48 NA | 72 NA | Ventilator   | 5 |
| 90  | 40 NA | 65 NA | Non-Rebreat  | 5 |
| 139 | 30 NA | 87 NA | Nasal Cannul | 0 |
| 83  | 26 NA | 93 NA | Nasal Cannul | 0 |

|     |       |       |              |   |
|-----|-------|-------|--------------|---|
| 145 | 28 NA | 51 NA | Ventilator   | 5 |
| 113 | 26 NA | 91 NA | Nasal Cannul | 0 |
| 114 | 22 NA | 86 NA | Room Air     | 0 |
| 118 | 38 NA | 76 NA | High-Flow    | 5 |
| 131 | 26 NA | 92 NA | Nasal Cannul | 0 |
| 145 | 52 NA | 2 NA  | Ventilator   | 5 |
| 119 | 24 NA | 86 NA | High-Flow    | 5 |
| 119 | 46 NA | 8 NA  | Ventilator   | 5 |
| 124 | 22 NA | 95 NA | Room Air     | 0 |
| 130 | 46 NA | 84 NA | Nasal Cannul | 0 |
| 127 | 44 NA | 99 NA | Non-Rebreat  | 5 |
| 140 | 48 NA | 57 NA | Ventilator   | 5 |
| 126 | 24 NA | 93 NA | Room Air     | 0 |
| 110 | 32 NA | 93 NA | Nasal Cannul | 0 |
| 103 | 32 NA | 92 NA | NIPPV (CPAP  | 5 |
| 79  | 24 NA | 97 NA | Room Air     | 0 |
| 148 | 28 NA | 86 NA | Nasal Cannul | 0 |
| 104 | 36 NA | 87 NA | Non-Rebreat  | 5 |
| 103 | 25 NA | 91 NA | Nasal Cannul | 0 |
| 136 | 44 NA | 87 NA | Ventilator   | 5 |
| 100 | 24 NA | 91 NA | Nasal Cannul | 0 |
| 134 | 28 NA | 70 NA | Non-Rebreat  | 5 |
| 98  | 33 NA | 87 NA | Nasal Cannul | 0 |
| 121 | 21 NA | 92 NA | Nasal Cannul | 0 |
| 97  | 22 NA | 94 NA | Room Air     | 0 |
| 98  | 26 NA | 92 NA | Room Air     | 0 |
| 105 | 28 NA | 91 NA | Nasal Cannul | 0 |
| 105 | 30 NA | 84 NA | Non-Rebreat  | 5 |
| 96  | 28 NA | 93 NA | Nasal Cannul | 0 |
| 90  | 20 NA | 89 NA | Room Air     | 0 |
| 89  | 30 NA | 87 NA | Non-Rebreat  | 5 |
| 129 | 42 NA | 71 NA | Non-Rebreat  | 5 |
| 111 | 36 NA | 93 NA | Non-Rebreat  | 5 |
| 82  | 24 NA | 92 NA | Room Air     | 0 |
| 105 | 22 NA | 96 NA | Room Air     | 0 |
| 74  | 30 NA | 93 NA | Nasal Cannul | 0 |
| 114 | 24 NA | 92 NA | Room Air     | 0 |
| 103 | 30 NA | 91 NA | Non-Rebreat  | 5 |
| 130 | 57 NA | 7 NA  | Ventilator   | 5 |
| 85  | 26 NA | 92 NA | Room Air     | 0 |
| 118 | 24 NA | 88 NA | Nasal Cannul | 0 |
| 135 | 60 NA | 87 NA | Ventilator   | 5 |
| 111 | 25 NA | 86 NA | Nasal Cannul | 0 |
| 137 | 24 NA | 91 NA | Nasal Cannul | 0 |
| 107 | 52 NA | 82 NA | NIPPV (CPAP  | 5 |

|     |        |        |              |   |
|-----|--------|--------|--------------|---|
| 115 | 20 NA  | 96 NA  | Room Air     | 0 |
| 86  | 24 NA  | 90 NA  | Nasal Cannul | 0 |
| 140 | 42 NA  | 85 NA  | High-Flow    | 5 |
| 118 | 25 NA  | 81 NA  | Nasal Cannul | 0 |
| 128 | 36 NA  | 88 NA  | Nasal Cannul | 0 |
| 86  | 32 NA  | 88 NA  | Non-Rebreat  | 5 |
| 95  | 22 NA  | 91 NA  | Room Air     | 0 |
| 116 | 28 NA  | 79 NA  | Nasal Cannul | 0 |
| 99  | 29 NA  | 96 NA  | Room Air     | 0 |
| 115 | 24 NA  | 92 NA  | Room Air     | 0 |
| 114 | 24 NA  | 97 NA  | Nasal Cannul | 0 |
| 126 | 32 NA  | 89 NA  | Nasal Cannul | 0 |
| 229 | 124 NA | 7 NA   | Ventilator   | 5 |
| 101 | 24 NA  | 89 NA  | Nasal Cannul | 0 |
| 96  | 18 NA  | 100 NA | Room Air     | 0 |
| 100 | 35 NA  | 96 NA  | Nasal Cannul | 0 |
| 130 | 22 NA  | 98 NA  | Room Air     | 0 |
| 129 | 55 NA  | 75 NA  | NIPPV (CPAP  | 5 |
| 139 | 22 NA  | 94 NA  | Room Air     | 0 |
| 176 | 58 NA  | 0 NA   | Non-Rebreat  | 5 |
| 106 | 22 NA  | 85 NA  | Nasal Cannul | 0 |
| 103 | 30 NA  | 92 NA  | Nasal Cannul | 0 |
| 93  | 36 NA  | 88 NA  | Nasal Cannul | 0 |
| 80  | 20 NA  | 97 NA  | Room Air     | 0 |
| 102 | 20 NA  | 100 NA | Room Air     | 0 |
| 92  | 24 NA  | 86 NA  | Non-Rebreat  | 5 |
| 156 | 103 NA | 80 NA  | Ventilator   | 5 |
| 92  | 27 NA  | 91 NA  | Room Air     | 0 |
| 105 | 34 NA  | 88 NA  | Nasal Cannul | 0 |
| 121 | 44 NA  | 88 NA  | NIPPV (CPAP  | 5 |
| 120 | 26 NA  | 91 NA  | Venti Mask   | 5 |
| 148 | 40 NA  | 91 NA  | Non-Rebreat  | 5 |
| 110 | 34 NA  | 78 NA  | NIPPV (CPAP  | 5 |
| 104 | 24 NA  | 96 NA  | Room Air     | 0 |
| 123 | 40 NA  | 50 NA  | NIPPV (CPAP  | 5 |
| 161 | 32 NA  | 55 NA  | Nasal Cannul | 0 |
| 99  | 28 NA  | 96 NA  | Venti Mask   | 5 |
| 188 | 59 NA  | 78 NA  | NIPPV (CPAP  | 5 |
| 114 | 32 NA  | 89 NA  | Non-Rebreat  | 5 |
| 117 | 48 NA  | 0 NA   | Ventilator   | 5 |
| 147 | 34 NA  | 84 NA  | Nasal Cannul | 0 |
| 127 | 49 NA  | 0 NA   | NIPPV (CPAP  | 5 |
| 120 | 28 NA  | 90 NA  | Room Air     | 0 |
| 90  | 20 NA  | 94 NA  | Nasal Cannul | 0 |
| 108 | 22 NA  | 96 NA  | Non-Rebreat  | 5 |

|     |       |       |              |   |
|-----|-------|-------|--------------|---|
| 121 | 36 NA | 87 NA | Nasal Cannul | 0 |
| 114 | 34 NA | 82 NA | NIPPV (CPAP  | 5 |
| 92  | 19 NA | 94 NA | Room Air     | 0 |
| 96  | 40 NA | 0 NA  | Non-Rebreat  | 5 |
| 90  | 20 NA | 97 NA | Room Air     | 0 |
| 159 | 22 NA | 96 NA | Nasal Cannul | 0 |
| 138 | 22 NA | 94 NA | Room Air     | 0 |
| 109 | 28 NA | 92 NA | Nasal Cannul | 0 |
| 168 | 51 NA | 46 NA | Ventilator   | 5 |
| 120 | 40 NA | 0 NA  | Non-Rebreat  | 5 |
| 116 | 22 NA | 91 NA | Room Air     | 0 |
| 107 | 28 NA | 88 NA | Nasal Cannul | 0 |
| 133 | 28 NA | 86 NA | Nasal Cannul | 0 |
| 118 | 24 NA | 95 NA | Venti Mask   | 5 |
| 89  | 32 NA | 95 NA | Nasal Cannul | 0 |
| 90  | 25 NA | 94 NA | Nasal Cannul | 0 |
| 100 | 36 NA | 96 NA | Non-Rebreat  | 5 |
| 94  | 30 NA | 93 NA | Nasal Cannul | 0 |
| 116 | 24 NA | 98 NA | Nasal Cannul | 0 |
| 107 | 30 NA | 83 NA | NIPPV (CPAP  | 5 |
| 111 | 40 NA | 95 NA | NIPPV (CPAP  | 5 |
| 100 | 24 NA | 97 NA | Nasal Cannul | 0 |
| 122 | 28 NA | 95 NA | NIPPV (CPAP  | 5 |
| 118 | 29 NA | 84 NA | Non-Rebreat  | 5 |
| 105 | 40 NA | 70 NA | Venti Mask   | 5 |
| 97  | 20 NA | 96 NA | Room Air     | 0 |
| 114 | 36 NA | 91 NA | Nasal Cannul | 0 |
| 170 | 38 NA | 99 NA | Nasal Cannul | 0 |
| 162 | 54 NA | 80 NA | Ventilator   | 5 |
| 148 | 51 NA | 87 NA | High-Flow    | 5 |
| 127 | 41 NA | 93 NA | Nasal Cannul | 0 |
| 102 | 32 NA | 86 NA | Non-Rebreat  | 5 |
| 128 | 50 NA | 86 NA | Non-Rebreat  | 5 |
| 133 | 18 NA | 95 NA | Room Air     | 0 |
| 100 | 36 NA | 83 NA | Venti Mask   | 5 |
| 103 | 18 NA | 84 NA | NIPPV (CPAP  | 5 |
| 131 | 52 NA | 67 NA | Ventilator   | 5 |
| 75  | 36 NA | 75 NA | High-Flow    | 5 |
| 200 | 81 NA | 75 NA | Ventilator   | 5 |
| 160 | 24 NA | 90 NA | Nasal Cannul | 0 |
| 76  | 28 NA | 95 NA | Nasal Cannul | 0 |
| 105 | 26 NA | 96 NA | Room Air     | 0 |
| 137 | 48 NA | 88 NA | Non-Rebreat  | 5 |
| 134 | 57 NA | 74 NA | Ventilator   | 5 |
| 122 | 26 NA | 96 NA | Nasal Cannul | 0 |

|     |        |        |              |   |
|-----|--------|--------|--------------|---|
| 114 | 44 NA  | 86 NA  | Non-Rebreat  | 5 |
| 122 | 44 NA  | 86 NA  | Nasal Cannul | 0 |
| 80  | 26 NA  | 91 NA  | Room Air     | 0 |
| 162 | 50 NA  | 87 NA  | Non-Rebreat  | 5 |
| 121 | 40 NA  | 75 NA  | Non-Rebreat  | 5 |
| 124 | 28 NA  | 85 NA  | Nasal Cannul | 0 |
| 132 | 42 NA  | 87 NA  | NIPPV (CPAP  | 5 |
| 100 | 36 NA  | 88 NA  | Ventilator   | 5 |
| 115 | 28 NA  | 90 NA  | Nasal Cannul | 0 |
| 88  | 28 NA  | 92 NA  | NIPPV (CPAP  | 5 |
| 100 | 38 NA  | 100 NA | Room Air     | 0 |
| 101 | 24 NA  | 88 NA  | Non-Rebreat  | 5 |
| 106 | 28 NA  | 98 NA  | Non-Rebreat  | 5 |
| 110 | 22 NA  | 93 NA  | Room Air     | 0 |
| 94  | 24 NA  | 94 NA  | Nasal Cannul | 0 |
| 105 | 28 NA  | 98 NA  | Room Air     | 0 |
| 133 | 32 NA  | 93 NA  | Nasal Cannul | 0 |
| 204 | 150 NA | 31 NA  | Ventilator   | 5 |
| 149 | 99 NA  | 92 NA  | Ventilator   | 5 |
| 138 | 30 NA  | 91 NA  | Non-Rebreat  | 5 |
| 112 | 24 NA  | 95 NA  | Nasal Cannul | 0 |
| 112 | 25 NA  | 99 NA  | Nasal Cannul | 0 |
| 107 | 40 NA  | 89 NA  | Nasal Cannul | 0 |
| 99  | 24 NA  | 97 NA  | Room Air     | 0 |
| 91  | 18 NA  | 100 NA | Room Air     | 0 |
| 98  | 28 NA  | 95 NA  | Nasal Cannul | 0 |
| 141 | 57 NA  | 79 NA  | Ventilator   | 5 |
| 114 | 35 NA  | 97 NA  | Non-Rebreat  | 5 |
| 104 | 24 NA  | 93 NA  | Nasal Cannul | 0 |
| 107 | 28 NA  | 91 NA  | Nasal Cannul | 0 |
| 103 | 30 NA  | 90 NA  | Nasal Cannul | 0 |
| 118 | 24 NA  | 88 NA  | Venti Mask   | 5 |
| 90  | 26 NA  | 90 NA  | Nasal Cannul | 0 |
| 134 | 34 NA  | 79 NA  | Non-Rebreat  | 5 |
| 180 | 64 NA  | 93 NA  | Ventilator   | 5 |
| 124 | 23 NA  | 93 NA  | Room Air     | 0 |
| 89  | 27 NA  | 94 NA  | Non-Rebreat  | 5 |
| 109 | 22 NA  | 96 NA  | Nasal Cannul | 0 |
| 107 | 22 NA  | 91 NA  | Nasal Cannul | 0 |
| 151 | 50 NA  | 80 NA  | Ventilator   | 5 |
| 88  | 20 NA  | 86 NA  | Nasal Cannul | 0 |
| 87  | 22 NA  | 100 NA | Non-Rebreat  | 5 |
| 90  | 20 NA  | 92 NA  | Room Air     | 0 |
| 115 | 15 NA  | 86 NA  | Venti Mask   | 5 |
| 111 | 28 NA  | 75 NA  | Non-Rebreat  | 5 |

|     |       |       |              |   |
|-----|-------|-------|--------------|---|
| 103 | 36 NA | 94 NA | Nasal Cannul | 0 |
| 121 | 28 NA | 94 NA | Non-Rebreat  | 5 |
| 91  | 28 NA | 87 NA | Nasal Cannul | 0 |
| 94  | 24 NA | 89 NA | Venti Mask   | 5 |
| 163 | 58 NA | 68 NA | Ventilator   | 5 |
| 100 | 26 NA | 91 NA | Room Air     | 0 |
| 112 | 26 NA | 80 NA | Nasal Cannul | 0 |
| 99  | 28 NA | 83 NA | Venti Mask   | 5 |
| 133 | 24 NA | 95 NA | Nasal Cannul | 0 |
| 106 | 30 NA | 90 NA | Venti Mask   | 5 |
| 108 | 26 NA | 87 NA | Non-Rebreat  | 5 |
| 106 | 30 NA | 84 NA | Non-Rebreat  | 5 |
| 116 | 28 NA | 85 NA | Nasal Cannul | 0 |
| 119 | 24 NA | 92 NA | Room Air     | 0 |
| 117 | 32 NA | 92 NA | Nasal Cannul | 0 |
| 132 | 50 NA | 89 NA | Nasal Cannul | 0 |
| 95  | 22 NA | 95 NA | Room Air     | 0 |
| 165 | 40 NA | 67 NA | Ventilator   | 5 |
| 123 | 48 NA | 86 NA | High-Flow    | 5 |
| 126 | 22 NA | 91 NA | Nasal Cannul | 0 |
| 108 | 58 NA | 76 NA | Non-Rebreat  | 5 |
| 119 | 54 NA | 72 NA | NIPPV (CPAP  | 5 |
| 81  | 26 NA | 93 NA | Nasal Cannul | 0 |
| 132 | 77 NA | 80 NA | NIPPV (CPAP  | 5 |
| 80  | 28 NA | 94 NA | Room Air     | 0 |
| 97  | 30 NA | 89 NA | Nasal Cannul | 0 |
| 111 | 30 NA | 98 NA | Venti Mask   | 5 |
| 122 | 20 NA | 92 NA | Room Air     | 0 |
| 159 | 53 NA | 73 NA | Ventilator   | 5 |
| 93  | 23 NA | 95 NA | Room Air     | 0 |
| 100 | 24 NA | 94 NA | Room Air     | 0 |
| 113 | 38 NA | 83 NA | Venti Mask   | 5 |
| 101 | 28 NA | 93 NA | Room Air     | 0 |
| 106 | 40 NA | 94 NA | Non-Rebreat  | 5 |
| 99  | 32 NA | 90 NA | Venti Mask   | 5 |
| 117 | 24 NA | 94 NA | Room Air     | 0 |
| 240 | 52 NA | 68 NA | Ventilator   | 5 |
| 133 | 66 NA | 91 NA | Ventilator   | 5 |
| 105 | 38 NA | 91 NA | Nasal Cannul | 0 |
| 102 | 24 NA | 98 NA | Room Air     | 0 |
| 100 | 30 NA | 93 NA | Non-Rebreat  | 5 |
| 108 | 26 NA | 90 NA | Nasal Cannul | 0 |
| 133 | 37 NA | 94 NA | Ventilator   | 5 |
| 117 | 30 NA | 91 NA | Non-Rebreat  | 5 |
| 124 | 40 NA | 91 NA | Nasal Cannul | 0 |

|     |       |       |              |   |
|-----|-------|-------|--------------|---|
| 118 | 36 NA | 90 NA | Nasal Cannul | 0 |
| 97  | 22 NA | 96 NA | Room Air     | 0 |
| 97  | 25 NA | 96 NA | Room Air     | 0 |
| 94  | 20 NA | 91 NA | Nasal Cannul | 0 |
| 71  | 24 NA | 91 NA | Nasal Cannul | 0 |
| 92  | 48 NA | 98 NA | Nasal Cannul | 0 |
| 107 | 26 NA | 93 NA | Room Air     | 0 |
| 112 | 33 NA | 90 NA | Non-Rebreat  | 5 |
| 102 | 22 NA | 93 NA | Room Air     | 0 |
| 98  | 24 NA | 93 NA | Room Air     | 0 |
| 141 | 22 NA | 86 NA | Venti Mask   | 5 |
| 115 | 28 NA | 87 NA | Venti Mask   | 5 |
| 132 | 75 NA | 64 NA | Ventilator   | 5 |
| 102 | 20 NA | 98 NA | Room Air     | 0 |
| 131 | 28 NA | 69 NA | Ventilator   | 5 |
| 115 | 36 NA | 97 NA | Nasal Cannul | 0 |
| 98  | 30 NA | 95 NA | Room Air     | 0 |
| 139 | 36 NA | 77 NA | Non-Rebreat  | 5 |
| 124 | 28 NA | 89 NA | Venti Mask   | 5 |
| 96  | 32 NA | 79 NA | Venti Mask   | 5 |
| 117 | 48 NA | 97 NA | Ventilator   | 5 |
| 114 | 21 NA | 90 NA | Room Air     | 0 |
| 131 | 44 NA | 89 NA | Nasal Cannul | 0 |
| 120 | 32 NA | 90 NA | Nasal Cannul | 0 |
| 92  | 18 NA | 85 NA | Nasal Cannul | 0 |
| 120 | 34 NA | 94 NA | Nasal Cannul | 0 |
| 115 | 48 NA | 89 NA | Nasal Cannul | 0 |
| 123 | 35 NA | 93 NA | Non-Rebreat  | 5 |
| 130 | 24 NA | 92 NA | Nasal Cannul | 0 |
| 82  | 40 NA | 72 NA | NIPPV (CPAP  | 5 |
| 164 | 34 NA | 53 NA | Non-Rebreat  | 5 |
| 125 | 30 NA | 82 NA | Non-Rebreat  | 5 |
| 157 | 52 NA | 59 NA | Ventilator   | 5 |
| 96  | 18 NA | 97 NA | Room Air     | 0 |
| 96  | 24 NA | 97 NA | Room Air     | 0 |
| 105 | 22 NA | 89 NA | Non-Rebreat  | 5 |
| 87  | 24 NA | 86 NA | Nasal Cannul | 0 |
| 113 | 26 NA | 91 NA | Nasal Cannul | 0 |
| 109 | 30 NA | 91 NA | Nasal Cannul | 0 |
| 116 | 32 NA | 94 NA | Room Air     | 0 |
| 149 | 26 NA | 95 NA | Room Air     | 0 |
| 160 | 22 NA | 95 NA | Non-Rebreat  | 5 |
| 110 | 30 NA | 86 NA | Room Air     | 0 |
| 104 | 28 NA | 85 NA | Nasal Cannul | 0 |
| 135 | 33 NA | 95 NA | Room Air     | 0 |



|     |       |       |              |   |
|-----|-------|-------|--------------|---|
| 92  | 26 NA | 89 NA | Nasal Cannul | 0 |
| 118 | 36 NA | 77 NA | NIPPV (CPAP  | 5 |
| 160 | 39 NA | 80 NA | Ventilator   | 5 |
| 114 | 25 NA | 86 NA | Nasal Cannul | 0 |
| 95  | 25 NA | 90 NA | Nasal Cannul | 0 |
| 22  | 83 NA | 89 NA | Nasal Cannul | 0 |
| 82  | 30 NA | 89 NA | Nasal Cannul | 0 |
| 88  | 28 NA | 89 NA | Nasal Cannul | 0 |
| 118 | 37 NA | 94 NA | Non-Rebreat  | 5 |
| 74  | 20 NA | 94 NA | Nasal Cannul | 0 |
| 91  | 27 NA | 96 NA | Nasal Cannul | 0 |
| 122 | 22 NA | 93 NA | Room Air     | 0 |
| 139 | 44 NA | 84 NA | NA NA        |   |
| 121 | 20 NA | 96 NA | Room Air     | 0 |
| 111 | 32 NA | 70 NA | Non-Rebreat  | 5 |
| 120 | 26 NA | 83 NA | NIPPV (CPAP  | 5 |
| 117 | 22 NA | 95 NA | Room Air     | 0 |
| 165 | 36 NA | 89 NA | Nasal Cannul | 0 |
| 118 | 30 NA | 94 NA | Room Air     | 0 |
| 114 | 30 NA | 90 NA | Nasal Cannul | 0 |
| 99  | 22 NA | 93 NA | Nasal Cannul | 0 |
| 125 | 28 NA | 84 NA | Nasal Cannul | 0 |
| 113 | 40 NA | 87 NA | Nasal Cannul | 0 |
| 108 | 20 NA | 93 NA | Nasal Cannul | 0 |
| 150 | 24 NA | 95 NA | Nasal Cannul | 0 |
| 130 | 22 NA | 92 NA | Nasal Cannul | 0 |
| 108 | 40 NA | 87 NA | Non-Rebreat  | 5 |
| 115 | 55 NA | 90 NA | Non-Rebreat  | 5 |
| 115 | 28 NA | 93 NA | Room Air     | 0 |
| 81  | 28 NA | 89 NA | Non-Rebreat  | 5 |
| 100 | 32 NA | 90 NA | Non-Rebreat  | 5 |
| 110 | 28 NA | 85 NA | Non-Rebreat  | 5 |
| 111 | 26 NA | 91 NA | Nasal Cannul | 0 |
| 107 | 29 NA | 84 NA | Non-Rebreat  | 5 |
| 124 | 42 NA | 86 NA | Non-Rebreat  | 5 |
| 110 | 40 NA | 92 NA | Non-Rebreat  | 5 |
| 102 | 22 NA | 94 NA | Nasal Cannul | 0 |
| 112 | 20 NA | 97 NA | Room Air     | 0 |
| 107 | 38 NA | 88 NA | Venti Mask   | 5 |
| 170 | 36 NA | 80 NA | NIPPV (CPAP  | 5 |
| 79  | 25 NA | 90 NA | Nasal Cannul | 0 |
| 94  | 26 NA | 90 NA | Nasal Cannul | 0 |
| 144 | 28 NA | 92 NA | Room Air     | 0 |
| 122 | 30 NA | 88 NA | Nasal Cannul | 0 |
| 113 | 30 NA | 89 NA | Nasal Cannul | 0 |

|     |       |       |              |    |
|-----|-------|-------|--------------|----|
| 117 | 41 NA | 81 NA | Non-Rebreat  | 5  |
| 70  | 28 NA | 81 NA | Venti Mask   | 5  |
| 111 | 28 NA | 90 NA | Nasal Cannul | 0  |
| 112 | 27 NA | 90 NA | Room Air     | 0  |
| 105 | 20 NA | 95 NA | Room Air     | 0  |
| 112 | 20 NA | 92 NA | Nasal Cannul | 0  |
| 140 | 32 NA | 80 NA | Non-Rebreat  | 5  |
| 84  | 22 NA | 96 NA | Room Air     | 0  |
| 137 | 24 NA | 87 NA | Nasal Cannul | 0  |
| 109 | 26 NA | 93 NA | Nasal Cannul | 0  |
| 83  | 26 NA | 82 NA | Venti Mask   | 5  |
| 113 | 28 NA | 88 NA | Nasal Cannul | 0  |
| 112 | 26 NA | 93 NA | Room Air     | 0  |
| 107 | 28 NA | 92 NA | Nasal Cannul | 0  |
| 121 | 24 NA | 88 NA | Nasal Cannul | 0  |
| 121 | 32 NA | 91 NA | Venti Mask   | 5  |
| 130 | 50 NA | 80 NA | Non-Rebreat  | 5  |
| 81  | 26 NA | 74 NA | Nasal Cannul | 0  |
| 125 | 24 NA | 88 NA | Nasal Cannul | 0  |
| 88  | 28 NA | 93 NA | Nasal Cannul | 0  |
| 114 | 34 NA | 77 NA | Non-Rebreat  | 5  |
| 126 | 35 NA | 92 NA | Nasal Cannul | 0  |
| 114 | 27 NA | 89 NA | Nasal Cannul | 0  |
| 134 | 33 NA | 98 NA | Ventilator   | 5  |
| 84  | 26 NA | 97 NA | Room Air     | 0  |
| 84  | 25 NA | 93 NA | Room Air     | 0  |
| 122 | 28 NA | 92 NA | Non-Rebreat  | 5  |
| 97  | 24 NA | 92 NA | Nasal Cannul | 0  |
| 153 | 41 NA | 53 NA | Ventilator   | 5  |
| 103 | 40 NA | 88 NA | Venti Mask   | 5  |
| 103 | 28 NA | 82 NA | Nasal Cannul | 0  |
| 102 | 48 NA | 90 NA | Non-Rebreat  | 5  |
| 98  | 32 NA | 93 NA | Nasal Cannul | 0  |
| 141 | 26 NA | 92 NA | Nasal Cannul | 0  |
| 109 | 31 NA | 85 NA | Nasal Cannul | 0  |
| 118 | 29 NA | 80 NA | Non-Rebreat  | 5  |
| 112 | 28 NA | 70 NA | Nasal Cannul | 0  |
| 118 | 20 NA | 90 NA | Nasal Cannul | 0  |
| 107 | 30 NA | 92 NA | Room Air     | 0  |
| 91  | 95 NA | 98 NA | Room Air     | 0  |
| 119 | 34 NA | 93 NA | Room Air     | 0  |
| NA  | NA    | NA    | NA           | NA |
| 81  | 38 NA | 91 NA | Nasal Cannul | 0  |
| 118 | 16 NA | 93 NA | Room Air     | 0  |
| 133 | 65 NA | 61 NA | Ventilator   | 5  |

|     |       |       |              |   |
|-----|-------|-------|--------------|---|
| 88  | 30 NA | 93 NA | Room Air     | 0 |
| 104 | 28 NA | 89 NA | Nasal Cannul | 0 |
| 91  | 36 NA | 89 NA | Nasal Cannul | 0 |
| 111 | 30 NA | 91 NA | Nasal Cannul | 0 |
| 57  | 17 NA | 96 NA | Nasal Cannul | 0 |
| 120 | 32 NA | 87 NA | Venti Mask   | 5 |
| 104 | 26 NA | 91 NA | Nasal Cannul | 0 |
| 118 | 30 NA | 84 NA | Nasal Cannul | 0 |
| 118 | 30 NA | 98 NA | Nasal Cannul | 0 |
| 162 | 36 NA | 79 NA | NIPPV (CPAP  | 5 |
| 125 | 28 NA | 88 NA | Nasal Cannul | 0 |
| 94  | 34 NA | 91 NA | Nasal Cannul | 0 |
| 112 | 30 NA | 88 NA | Nasal Cannul | 0 |
| 147 | 36 NA | 82 NA | Venti Mask   | 5 |
| 113 | 28 NA | 86 NA | Nasal Cannul | 0 |
| 88  | 26 NA | 90 NA | Nasal Cannul | 0 |
| 83  | 23 NA | 93 NA | Nasal Cannul | 0 |
| 115 | 32 NA | 81 NA | Nasal Cannul | 0 |
| 101 | 26 NA | 83 NA | Non-Rebreat  | 5 |
| 101 | 19 NA | 93 NA | Nasal Cannul | 0 |
| 115 | 42 NA | 86 NA | Ventilator   | 5 |
| 108 | 24 NA | 94 NA | Room Air     | 0 |
| 101 | 18 NA | 99 NA | Room Air     | 0 |
| 124 | 40 NA | 88 NA | Nasal Cannul | 0 |
| 94  | 36 NA | 79 NA | Non-Rebreat  | 5 |
| 94  | 26 NA | 92 NA | Nasal Cannul | 0 |
| 91  | 33 NA | 92 NA | Nasal Cannul | 0 |
| 163 | 50 NA | 82 NA | Venti Mask   | 5 |
| 149 | 33 NA | 88 NA | Room Air     | 0 |
| 113 | 22 NA | 95 NA | Room Air     | 0 |
| 102 | 26 NA | 92 NA | Room Air     | 0 |
| 76  | 21 NA | 83 NA | Nasal Cannul | 0 |
| 96  | 27 NA | 94 NA | Room Air     | 0 |
| 130 | 45 NA | 45 NA | Ventilator   | 5 |
| 143 | 45 NA | 78 NA | Ventilator   | 5 |
| 122 | 42 NA | 86 NA | Venti Mask   | 5 |
| 126 | 28 NA | 85 NA | Non-Rebreat  | 5 |
| 140 | 52 NA | 79 NA | NIPPV (CPAP  | 5 |
| 114 | 26 NA | 91 NA | Nasal Cannul | 0 |
| 121 | 48 NA | 90 NA | NIPPV (CPAP  | 5 |
| 135 | 44 NA | 84 NA | High-Flow    | 5 |
| 120 | 34 NA | 88 NA | High-Flow    | 5 |
| 155 | 40 NA | 81 NA | NIPPV (CPAP  | 5 |
| 101 | 28 NA | 91 NA | Nasal Cannul | 0 |
| 118 | 20 NA | 90 NA | Nasal Cannul | 0 |

|     |       |        |              |   |
|-----|-------|--------|--------------|---|
| 135 | 60 NA | 74 NA  | Non-Rebreat  | 5 |
| 159 | 20 NA | 92 NA  | Room Air     | 0 |
| 84  | 22 NA | 92 NA  | Nasal Cannul | 0 |
| 138 | 30 NA | 94 NA  | Room Air     | 0 |
| 125 | 44 NA | 76 NA  | Non-Rebreat  | 5 |
| 124 | 30 NA | 81 NA  | Non-Rebreat  | 5 |
| 145 | 30 NA | 73 NA  | High-Flow    | 5 |
| 72  | 40 NA | 89 NA  | Nasal Cannul | 0 |
| 101 | 28 NA | 89 NA  | Nasal Cannul | 0 |
| 87  | 36 NA | 91 NA  | Nasal Cannul | 0 |
| 92  | 21 NA | 97 NA  | Room Air     | 0 |
| 92  | 36 NA | 86 NA  | Nasal Cannul | 0 |
| 118 | 60 NA | 91 NA  | Venti Mask   | 5 |
| 135 | 26 NA | 93 NA  | Room Air     | 0 |
| 55  | 28 NA | 93 NA  | Nasal Cannul | 0 |
| 106 | 55 NA | 72 NA  | Non-Rebreat  | 5 |
| 125 | 30 NA | 77 NA  | Ventilator   | 5 |
| 110 | 22 NA | 87 NA  | Nasal Cannul | 0 |
| 150 | 52 NA | 78 NA  | Venti Mask   | 5 |
| 120 | 39 NA | 79 NA  | Ventilator   | 5 |
| 112 | 53 NA | 84 NA  | Nasal Cannul | 0 |
| 124 | 36 NA | 45 NA  | Ventilator   | 5 |
| 82  | 25 NA | 91 NA  | Nasal Cannul | 0 |
| 104 | 24 NA | 95 NA  | Nasal Cannul | 0 |
| 144 | 44 NA | 56 NA  | Ventilator   | 5 |
| 107 | 28 NA | 91 NA  | Non-Rebreat  | 5 |
| 115 | 42 NA | 71 NA  | Non-Rebreat  | 5 |
| 97  | 44 NA | 87 NA  | Non-Rebreat  | 5 |
| 119 | 56 NA | 96 NA  | Non-Rebreat  | 5 |
| 110 | 38 NA | 91 NA  | Nasal Cannul | 0 |
| 89  | 22 NA | 92 NA  | Nasal Cannul | 0 |
| 90  | 20 NA | 89 NA  | Nasal Cannul | 0 |
| 142 | 28 NA | 95 NA  | Non-Rebreat  | 5 |
| 139 | 34 NA | 87 NA  | High-Flow    | 5 |
| 84  | 28 NA | 91 NA  | Non-Rebreat  | 5 |
| 107 | 21 NA | 93 NA  | Room Air     | 0 |
| 98  | 28 NA | 89 NA  | Nasal Cannul | 0 |
| 140 | 24 NA | 88 NA  | Nasal Cannul | 0 |
| 72  | 34 NA | 95 NA  | Nasal Cannul | 0 |
| 100 | 28 NA | 85 NA  | High-Flow    | 5 |
| 104 | 61 NA | 100 NA | High-Flow    | 5 |
| 105 | 26 NA | 88 NA  | Nasal Cannul | 0 |
| 110 | 30 NA | 87 NA  | Nasal Cannul | 0 |
| 106 | 44 NA | 84 NA  | High-Flow    | 5 |
| 100 | 36 NA | 94 NA  | Nasal Cannul | 0 |

|     |       |        |              |   |
|-----|-------|--------|--------------|---|
| 90  | 32 NA | 88 NA  | Non-Rebreath | 5 |
| 110 | 24 NA | 96 NA  | Nasal Cannul | 0 |
| 109 | 30 NA | 88 NA  | Nasal Cannul | 0 |
| 125 | 28 NA | 75 NA  | Nasal Cannul | 0 |
| 121 | 24 NA | 88 NA  | Nasal Cannul | 0 |
| 115 | 30 NA | 78 NA  | Non-Rebreath | 5 |
| 132 | 44 NA | 79 NA  | Ventilator   | 5 |
| 95  | 40 NA | 88 NA  | Nasal Cannul | 0 |
| 129 | 35 NA | 90 NA  | Nasal Cannul | 0 |
| 138 | 28 NA | 90 NA  | Nasal Cannul | 0 |
| 135 | 55 NA | 48 NA  | NIPPV (CPAP  | 5 |
| 100 | 20 NA | 93 NA  | Room Air     | 0 |
| 105 | 20 NA | 96 NA  | Room Air     | 0 |
| 118 | 50 NA | 50 NA  | Ventilator   | 5 |
| 74  | 32 NA | 94 NA  | NIPPV (CPAP  | 5 |
| 76  | 32 NA | 86 NA  | Non-Rebreath | 5 |
| 95  | 24 NA | 90 NA  | Nasal Cannul | 0 |
| 175 | 40 NA | 85 NA  | NIPPV (CPAP  | 5 |
| 99  | 24 NA | 87 NA  | Nasal Cannul | 0 |
| 89  | 22 NA | 94 NA  | Room Air     | 0 |
| 81  | 20 NA | 99 NA  | Room Air     | 0 |
| 209 | 26 NA | 82 NA  | Ventilator   | 5 |
| 119 | 20 NA | 93 NA  | Room Air     | 0 |
| 120 | 28 NA | 82 NA  | Venti Mask   | 5 |
| 94  | 47 NA | 92 NA  | Ventilator   | 5 |
| 118 | 18 NA | 95 NA  | Room Air     | 0 |
| 134 | 44 NA | 78 NA  | Ventilator   | 5 |
| 93  | 32 NA | 89 NA  | NIPPV (CPAP  | 5 |
| 124 | 28 NA | 93 NA  | Nasal Cannul | 0 |
| 126 | 28 NA | 80 NA  | Venti Mask   | 5 |
| 96  | 23 NA | 92 NA  | Nasal Cannul | 0 |
| 108 | 22 NA | 194 NA | Nasal Cannul | 0 |
| 115 | 27 NA | 88 NA  | Nasal Cannul | 0 |
| 113 | 24 NA | 93 NA  | Nasal Cannul | 0 |
| 130 | 58 NA | 31 NA  | Ventilator   | 5 |
| 107 | 24 NA | 94 NA  | Nasal Cannul | 0 |
| 140 | 22 NA | 95 NA  | Nasal Cannul | 0 |
| 132 | 48 NA | 88 NA  | Nasal Cannul | 0 |
| 105 | 32 NA | 91 NA  | Non-Rebreath | 5 |
| 112 | 60 NA | 78 NA  | NIPPV (CPAP  | 5 |
| 81  | 18 NA | 96 NA  | Room Air     | 0 |
| 159 | 54 NA | 34 NA  | Ventilator   | 5 |
| 105 | 32 NA | 85 NA  | Nasal Cannul | 0 |
| 112 | 24 NA | 88 NA  | Nasal Cannul | 0 |
| 127 | 22 NA | 92 NA  | Room Air     | 0 |

|     |        |       |              |   |
|-----|--------|-------|--------------|---|
| 150 | 37 NA  | 75 NA | Ventilator   | 5 |
| 111 | 32 NA  | 83 NA | Venti Mask   | 5 |
| 146 | 36 NA  | 94 NA | Nasal Cannul | 0 |
| 101 | 36 NA  | 86 NA | Nasal Cannul | 0 |
| 102 | 28 NA  | 93 NA | Nasal Cannul | 0 |
| 123 | 32 NA  | 93 NA | Non-Rebreat  | 5 |
| 113 | 30 NA  | 97 NA | Nasal Cannul | 0 |
| 133 | 40 NA  | 87 NA | Venti Mask   | 5 |
| 113 | 26 NA  | 91 NA | Nasal Cannul | 0 |
| 121 | 22 NA  | 91 NA | Nasal Cannul | 0 |
| 116 | 39 NA  | 90 NA | Nasal Cannul | 0 |
| 96  | 22 NA  | 93 NA | Room Air     | 0 |
| 132 | 44 NA  | 69 NA | Ventilator   | 5 |
| 120 | 28 NA  | 87 NA | Nasal Cannul | 0 |
| 109 | 22 NA  | 94 NA | Room Air     | 0 |
| 135 | 89 NA  | 99 NA | Ventilator   | 5 |
| 151 | 46 NA  | 86 NA | NIPPV (CPAP  | 5 |
| 137 | 34 NA  | 78 NA | Room Air     | 0 |
| 110 | 38 NA  | 88 NA | Ventilator   | 5 |
| 134 | 24 NA  | 91 NA | Room Air     | 0 |
| 124 | 20 NA  | 93 NA | Room Air     | 0 |
| 100 | 22 NA  | 96 NA | Room Air     | 0 |
| 90  | 38 NA  | 89 NA | Non-Rebreat  | 5 |
| 97  | 22 NA  | 98 NA | Room Air     | 0 |
| 90  | 32 NA  | 85 NA | Nasal Cannul | 0 |
| 158 | 55 NA  | 64 NA | Ventilator   | 5 |
| 102 | 22 NA  | 92 NA | Nasal Cannul | 0 |
| 117 | 30 NA  | 90 NA | Non-Rebreat  | 5 |
| 106 | 25 NA  | 94 NA | Room Air     | 0 |
| 100 | 27 NA  | 89 NA | Nasal Cannul | 0 |
| 80  | 69 NA  | 67 NA | Ventilator   | 5 |
| 105 | 34 NA  | 81 NA | Non-Rebreat  | 5 |
| 106 | 26 NA  | 98 NA | Room Air     | 0 |
| 88  | 22 NA  | 95 NA | Room Air     | 0 |
| 149 | 110 NA | 93 NA | Ventilator   | 5 |
| 102 | 42 NA  | 94 NA | Nasal Cannul | 0 |
| 113 | 42 NA  | 91 NA | Nasal Cannul | 0 |
| 148 | 51 NA  | 25 NA | Ventilator   | 5 |
| 109 | 32 NA  | 79 NA | Venti Mask   | 5 |
| 161 | 26 NA  | 95 NA | Nasal Cannul | 0 |
| 103 | 24 NA  | 90 NA | Nasal Cannul | 0 |
| 89  | 40 NA  | 89 NA | Room Air     | 0 |
| 107 | 40 NA  | 66 NA | NIPPV (CPAP  | 5 |
| 88  | 26 NA  | 95 NA | Room Air     | 0 |
| 123 | 26 NA  | 90 NA | Nasal Cannul | 0 |

|     |       |       |              |   |
|-----|-------|-------|--------------|---|
| 155 | 50 NA | 76 NA | Ventilator   | 5 |
| 107 | 42 NA | 90 NA | Nasal Cannul | 0 |
| 103 | 22 NA | 96 NA | Room Air     | 0 |
| 110 | 25 NA | 88 NA | NIPPV (CPAP  | 5 |
| 145 | 30 NA | 94 NA | Nasal Cannul | 0 |
| 109 | 33 NA | 93 NA | Nasal Cannul | 0 |
| 245 | 60 NA | 69 NA | Ventilator   | 5 |
| 110 | 34 NA | 88 NA | Nasal Cannul | 0 |
| 116 | 36 NA | 93 NA | Nasal Cannul | 0 |
| 84  | 20 NA | 93 NA | Nasal Cannul | 0 |
| 109 | 22 NA | 93 NA | Room Air     | 0 |
| 124 | 36 NA | 88 NA | NIPPV (CPAP  | 5 |
| 74  | 24 NA | 94 NA | Room Air     | 0 |
| 116 | 28 NA | 91 NA | Nasal Cannul | 0 |
| 101 | 28 NA | 88 NA | Nasal Cannul | 0 |
| 67  | 28 NA | 99 NA | Room Air     | 0 |
| 109 | 28 NA | 88 NA | Non-Rebreat  | 5 |
| 98  | 20 NA | 94 NA | Room Air     | 0 |
| 116 | 40 NA | 60 NA | Non-Rebreat  | 5 |
| 124 | 73 NA | 78 NA | Ventilator   | 5 |
| 94  | 28 NA | 88 NA | Nasal Cannul | 0 |
| 109 | 28 NA | 88 NA | Nasal Cannul | 0 |
| 174 | 46 NA | 97 NA | Ventilator   | 5 |
| 98  | 32 NA | 87 NA | Non-Rebreat  | 5 |
| 134 | 20 NA | 95 NA | Room Air     | 0 |
| 118 | 22 NA | 90 NA | Room Air     | 0 |
| 126 | 27 NA | 93 NA | Room Air     | 0 |
| 75  | 20 NA | 99 NA | Room Air     | 0 |
| 111 | 34 NA | 82 NA | High-Flow    | 5 |
| 103 | 20 NA | 94 NA | Room Air     | 0 |
| 117 | 26 NA | 20 NA | Nasal Cannul | 0 |
| 105 | 40 NA | 87 NA | Non-Rebreat  | 5 |
| 69  | 28 NA | 96 NA | Room Air     | 0 |
| 129 | 24 NA | 88 NA | Nasal Cannul | 0 |
| 140 | 20 NA | 92 NA | Nasal Cannul | 0 |
| 95  | 30 NA | 72 NA | Non-Rebreat  | 5 |
| 129 | 27 NA | 88 NA | Nasal Cannul | 0 |
| 117 | 42 NA | 86 NA | Non-Rebreat  | 5 |
| 109 | 26 NA | 92 NA | Nasal Cannul | 0 |
| 114 | 22 NA | 91 NA | Nasal Cannul | 0 |
| 96  | 22 NA | 86 NA | Nasal Cannul | 0 |
| 96  | 34 NA | 95 NA | Non-Rebreat  | 5 |
| 126 | 34 NA | 86 NA | Non-Rebreat  | 5 |
| 106 | 32 NA | 87 NA | Non-Rebreat  | 5 |
| 114 | 36 NA | 87 NA | Non-Rebreat  | 5 |

|     |       |        |              |   |
|-----|-------|--------|--------------|---|
| 141 | 40 NA | 88 NA  | Non-Rebreat  | 5 |
| 88  | 36 NA | 82 NA  | Nasal Cannul | 0 |
| 122 | 24 NA | 95 NA  | Room Air     | 0 |
| 110 | 28 NA | 82 NA  | Non-Rebreat  | 5 |
| 98  | 28 NA | 81 NA  | Nasal Cannul | 0 |
| 97  | 24 NA | 93 NA  | Room Air     | 0 |
| 100 | 20 NA | 93 NA  | Room Air     | 0 |
| 99  | 25 NA | 85 NA  | Nasal Cannul | 0 |
| 148 | 30 NA | 93 NA  | Nasal Cannul | 0 |
| 100 | 35 NA | 84 NA  | Non-Rebreat  | 5 |
| 209 | 55 NA | 86 NA  | Ventilator   | 5 |
| 94  | 22 NA | 92 NA  | Non-Rebreat  | 5 |
| 101 | 30 NA | 88 NA  | Venti Mask   | 5 |
| 100 | 28 NA | 93 NA  | Nasal Cannul | 0 |
| 105 | 30 NA | 87 NA  | Non-Rebreat  | 5 |
| 125 | 22 NA | 92 NA  | Room Air     | 0 |
| 159 | 56 NA | 92 NA  | Ventilator   | 5 |
| 118 | 30 NA | 88 NA  | Non-Rebreat  | 5 |
| 110 | 20 NA | 89 NA  | Room Air     | 0 |
| 128 | 39 NA | 100 NA | Non-Rebreat  | 5 |
| 99  | 22 NA | 98 NA  | Room Air     | 0 |
| 121 | 49 NA | 73 NA  | NIPPV (CPAP  | 5 |
| 112 | 30 NA | 87 NA  | Non-Rebreat  | 5 |
| 116 | 29 NA | 88 NA  | Nasal Cannul | 0 |
| 113 | 20 NA | 98 NA  | Room Air     | 0 |
| 160 | 34 NA | 0 NA   | Ventilator   | 5 |
| 150 | 40 NA | 80 NA  | NIPPV (CPAP  | 5 |
| 124 | 24 NA | 86 NA  | Non-Rebreat  | 5 |
| 125 | 43 NA | 94 NA  | Room Air     | 0 |
| 152 | 32 NA | 91 NA  | Nasal Cannul | 0 |
| 157 | 30 NA | 93 NA  | Nasal Cannul | 0 |
| 117 | 24 NA | 92 NA  | Room Air     | 0 |
| 89  | 31 NA | 93 NA  | Room Air     | 0 |
| 108 | 22 NA | 95 NA  | Room Air     | 0 |
| 89  | 26 NA | 80 NA  | Nasal Cannul | 0 |
| 96  | 21 NA | 95 NA  | Room Air     | 0 |
| 127 | 30 NA | 82 NA  | Non-Rebreat  | 5 |
| 102 | 32 NA | 85 NA  | Nasal Cannul | 0 |
| 90  | 26 NA | 89 NA  | Nasal Cannul | 0 |
| 120 | 25 NA | 86 NA  | Nasal Cannul | 0 |
| 136 | 93 NA | 92 NA  | Ventilator   | 5 |
| 93  | 22 NA | 92 NA  | Nasal Cannul | 0 |
| 108 | 26 NA | 100 NA | Venti Mask   | 5 |
| 96  | 22 NA | 93 NA  | Nasal Cannul | 0 |
| 121 | 57 NA | 91 NA  | Nasal Cannul | 0 |



|     |       |       |              |   |
|-----|-------|-------|--------------|---|
| 90  | 20 NA | 95 NA | Nasal Cannul | 0 |
| 123 | 40 NA | 92 NA | Non-Rebreat  | 5 |
| 93  | 36 NA | 85 NA | Non-Rebreat  | 5 |
| 123 | 40 NA | 73 NA | Ventilator   | 5 |
| 124 | 24 NA | 93 NA | Nasal Cannul | 0 |
| 81  | 30 NA | 88 NA | Nasal Cannul | 0 |
| 136 | 35 NA | 64 NA | NIPPV (CPAP  | 5 |
| 189 | 49 NA | 82 NA | Ventilator   | 5 |
| 120 | 25 NA | 92 NA | Nasal Cannul | 0 |
| 119 | 34 NA | 70 NA | Non-Rebreat  | 5 |
| 97  | 25 NA | 91 NA | Nasal Cannul | 0 |
| 95  | 20 NA | 91 NA | Nasal Cannul | 0 |
| 123 | 28 NA | 93 NA | Room Air     | 0 |
| 95  | 24 NA | 94 NA | Room Air     | 0 |
| 155 | 65 NA | 80 NA | Ventilator   | 5 |
| 74  | 36 NA | 87 NA | Nasal Cannul | 0 |
| 153 | 60 NA | 86 NA | NIPPV (CPAP  | 5 |
| 115 | 40 NA | 88 NA | NIPPV (CPAP  | 5 |
| 117 | 36 NA | 89 NA | Nasal Cannul | 0 |
| 130 | 44 NA | 62 NA | Ventilator   | 5 |
| 162 | 49 NA | 67 NA | Ventilator   | 5 |
| 103 | 24 NA | 91 NA | Nasal Cannul | 0 |
| 92  | 24 NA | 91 NA | Nasal Cannul | 0 |
| 74  | 22 NA | 94 NA | Nasal Cannul | 0 |
| 120 | 26 NA | 89 NA | Nasal Cannul | 0 |
| 118 | 70 NA | 78 NA | Non-Rebreat  | 5 |
| 147 | 46 NA | 70 NA | Ventilator   | 5 |
| 92  | 52 NA | 93 NA | NIPPV (CPAP  | 5 |
| 123 | 40 NA | 73 NA | Non-Rebreat  | 5 |
| 126 | 40 NA | 25 NA | Ventilator   | 5 |
| 151 | 58 NA | 25 NA | Ventilator   | 5 |
| 125 | 26 NA | 93 NA | Nasal Cannul | 0 |
| 100 | 25 NA | 72 NA | NIPPV (CPAP  | 5 |
| 107 | 26 NA | 91 NA | Nasal Cannul | 0 |
| 107 | 28 NA | 86 NA | Nasal Cannul | 0 |
| 125 | 40 NA | 71 NA | Ventilator   | 5 |
| 96  | 28 NA | 24 NA | Nasal Cannul | 0 |
| 111 | 24 NA | 86 NA | Nasal Cannul | 0 |
| 132 | 36 NA | 91 NA | Nasal Cannul | 0 |
| 118 | 28 NA | 85 NA | Venti Mask   | 5 |
| 124 | 60 NA | 89 NA | Non-Rebreat  | 5 |
| 108 | 50 NA | 86 NA | Non-Rebreat  | 5 |
| 118 | 30 NA | 88 NA | Nasal Cannul | 0 |
| 103 | 24 NA | 95 NA | Room Air     | 0 |
| 117 | 30 NA | 90 NA | Nasal Cannul | 0 |

|     |       |       |              |   |
|-----|-------|-------|--------------|---|
| 90  | 22 NA | 89 NA | Nasal Cannul | 0 |
| 84  | 20 NA | 92 NA | Room Air     | 0 |
| 89  | 21 NA | 97 NA | Room Air     | 0 |
| 118 | 28 NA | 92 NA | Nasal Cannul | 0 |
| 145 | 84 NA | 41 NA | Ventilator   | 5 |
| 105 | 20 NA | 92 NA | Room Air     | 0 |
| 85  | 36 NA | 80 NA | Non-Rebreat  | 5 |
| 101 | 25 NA | 91 NA | Nasal Cannul | 0 |
| 125 | 33 NA | 90 NA | Nasal Cannul | 0 |
| 128 | 39 NA | 76 NA | Nasal Cannul | 0 |
| 163 | 48 NA | 16 NA | Ventilator   | 5 |
| 129 | 32 NA | 84 NA | Nasal Cannul | 0 |
| 110 | 28 NA | 95 NA | Room Air     | 0 |
| 101 | 20 NA | 97 NA | Room Air     | 0 |
| 110 | 32 NA | 81 NA | Non-Rebreat  | 5 |
| 103 | 24 NA | 92 NA | Nasal Cannul | 0 |
| 120 | 21 NA | 96 NA | Room Air     | 0 |
| 79  | 37 NA | 89 NA | Non-Rebreat  | 5 |
| 77  | 28 NA | 94 NA | Nasal Cannul | 0 |
| 100 | 22 NA | 94 NA | Room Air     | 0 |
| 91  | 24 NA | 91 NA | Nasal Cannul | 0 |
| 95  | 20 NA | 93 NA | Nasal Cannul | 0 |
| 99  | 26 NA | 92 NA | Nasal Cannul | 0 |
| 136 | 52 NA | 79 NA | Ventilator   | 5 |
| 98  | 40 NA | 87 NA | Nasal Cannul | 0 |
| 144 | 70 NA | 90 NA | Ventilator   | 5 |
| 100 | 32 NA | 91 NA | Nasal Cannul | 0 |
| 126 | 44 NA | 85 NA | Non-Rebreat  | 5 |
| 92  | 24 NA | 91 NA | Nasal Cannul | 0 |
| 114 | 30 NA | 90 NA | NIPPV (CPAP  | 5 |
| 111 | 26 NA | 91 NA | Nasal Cannul | 0 |
| 118 | 35 NA | 91 NA | Nasal Cannul | 0 |
| 109 | 30 NA | 94 NA | Nasal Cannul | 0 |
| 158 | 45 NA | 56 NA | Ventilator   | 5 |
| 89  | 26 NA | 85 NA | Room Air     | 0 |
| 156 | 50 NA | 38 NA | Ventilator   | 5 |
| 137 | 33 NA | 88 NA | Nasal Cannul | 0 |
| 82  | 20 NA | 95 NA | Room Air     | 0 |
| 119 | 24 NA | 91 NA | Nasal Cannul | 0 |
| 132 | 28 NA | 90 NA | Room Air     | 0 |
| 134 | 28 NA | 91 NA | Nasal Cannul | 0 |
| 94  | 30 NA | 87 NA | Non-Rebreat  | 5 |
| 99  | 24 NA | 93 NA | Nasal Cannul | 0 |
| 94  | 22 NA | 95 NA | Room Air     | 0 |
| 116 | 50 NA | 91 NA | Non-Rebreat  | 5 |

|     |       |       |              |   |
|-----|-------|-------|--------------|---|
| 122 | 22 NA | 91 NA | Nasal Cannul | 0 |
| 104 | 20 NA | 95 NA | Room Air     | 0 |
| 169 | 56 NA | 32 NA | Ventilator   | 5 |
| 108 | 40 NA | 93 NA | Nasal Cannul | 0 |
| 165 | 50 NA | 45 NA | Ventilator   | 5 |
| 126 | 24 NA | 91 NA | Room Air     | 0 |
| 69  | 20 NA | 92 NA | Nasal Cannul | 0 |
| 116 | 22 NA | 97 NA | Room Air     | 0 |
| 168 | 20 NA | 93 NA | Room Air     | 0 |
| 146 | 44 NA | 86 NA | Venti Mask   | 5 |
| 93  | 22 NA | 89 NA | Nasal Cannul | 0 |
| 101 | 30 NA | 64 NA | Venti Mask   | 5 |
| 107 | 32 NA | 65 NA | Venti Mask   | 5 |
| 127 | 38 NA | 90 NA | Nasal Cannul | 0 |
| 95  | 20 NA | 93 NA | Room Air     | 0 |
| 116 | 32 NA | 90 NA | High-Flow    | 5 |
| 124 | 38 NA | 78 NA | Non-Rebreat  | 5 |
| 92  | 22 NA | 94 NA | Room Air     | 0 |
| 130 | 41 NA | 90 NA | NIPPV (CPAP  | 5 |
| 95  | 21 NA | 97 NA | Room Air     | 0 |
| 102 | 28 NA | 88 NA | Nasal Cannul | 0 |
| 114 | 24 NA | 92 NA | Nasal Cannul | 0 |
| 88  | 28 NA | 92 NA | Nasal Cannul | 0 |
| 117 | 48 NA | 92 NA | Nasal Cannul | 0 |
| 123 | 31 NA | 40 NA | Ventilator   | 5 |
| 95  | 34 NA | 86 NA | Nasal Cannul | 0 |
| 150 | 56 NA | 81 NA | Ventilator   | 5 |
| 90  | 28 NA | 90 NA | Non-Rebreat  | 5 |
| 97  | 32 NA | 92 NA | Venti Mask   | 5 |
| 124 | 30 NA | 89 NA | Venti Mask   | 5 |
| 96  | 22 NA | 94 NA | Room Air     | 0 |
| 89  | 36 NA | 92 NA | Nasal Cannul | 0 |
| 120 | 33 NA | 78 NA | NIPPV (CPAP  | 5 |
| 86  | 32 NA | 91 NA | Nasal Cannul | 0 |
| 120 | 22 NA | 94 NA | Room Air     | 0 |
| 121 | 28 NA | 88 NA | Nasal Cannul | 0 |
| 122 | 40 NA | 88 NA | Non-Rebreat  | 5 |
| 111 | 43 NA | 45 NA | Ventilator   | 5 |
| 121 | 24 NA | 84 NA | Non-Rebreat  | 5 |
| 91  | 44 NA | 91 NA | Nasal Cannul | 0 |
| 97  | 24 NA | 94 NA | Room Air     | 0 |
| 100 | 22 NA | 94 NA | Room Air     | 0 |
| 106 | 26 NA | 88 NA | Nasal Cannul | 0 |
| 113 | 32 NA | 85 NA | Venti Mask   | 5 |
| 98  | 52 NA | 92 NA | Nasal Cannul | 0 |

|     |       |       |              |   |
|-----|-------|-------|--------------|---|
| 114 | 36 NA | 92 NA | Non-Rebreath | 5 |
| 112 | 34 NA | 90 NA | Non-Rebreath | 5 |
| 102 | 28 NA | 90 NA | Nasal Cannul | 0 |
| 90  | 44 NA | 91 NA | Nasal Cannul | 0 |
| 112 | 24 NA | 93 NA | Room Air     | 0 |
| 94  | 28 NA | 87 NA | Nasal Cannul | 0 |
| 107 | 20 NA | 94 NA | Nasal Cannul | 0 |
| 129 | 38 NA | 80 NA | Non-Rebreath | 5 |
| 131 | 37 NA | 81 NA | Non-Rebreath | 5 |
| 125 | 27 NA | 82 NA | Nasal Cannul | 0 |
| 125 | 35 NA | 90 NA | Non-Rebreath | 5 |
| 70  | 31 NA | 95 NA | Room Air     | 0 |
| 60  | 20 NA | 98 NA | Room Air     | 0 |
| 111 | 22 NA | 90 NA | Nasal Cannul | 0 |
| 105 | 23 NA | 91 NA | Ventilator   | 5 |
| 114 | 45 NA | 38 NA | Ventilator   | 5 |
| 153 | 43 NA | 35 NA | Ventilator   | 5 |
| 123 | 30 NA | 85 NA | Non-Rebreath | 5 |
| 107 | 50 NA | 84 NA | Non-Rebreath | 5 |
| 58  | 34 NA | 92 NA | Nasal Cannul | 0 |
| 88  | 29 NA | 81 NA | Nasal Cannul | 0 |
| 85  | 22 NA | 93 NA | Nasal Cannul | 0 |
| 153 | 52 NA | 66 NA | Ventilator   | 5 |
| 108 | 20 NA | 97 NA | Room Air     | 0 |
| 101 | 25 NA | 85 NA | Room Air     | 0 |
| 117 | 30 NA | 90 NA | Nasal Cannul | 0 |
| 108 | 28 NA | 92 NA | Nasal Cannul | 0 |
| 109 | 25 NA | 79 NA | Venti Mask   | 5 |
| 95  | 30 NA | 91 NA | Nasal Cannul | 0 |
| 102 | 24 NA | 91 NA | Non-Rebreath | 5 |
| 91  | 20 NA | 97 NA | Room Air     | 0 |
| 133 | 24 NA | 91 NA | Nasal Cannul | 0 |
| 64  | 35 NA | 66 NA | Non-Rebreath | 5 |
| 145 | 49 NA | 50 NA | High-Flow    | 5 |
| 91  | 30 NA | 93 NA | Nasal Cannul | 0 |
| 65  | 22 NA | 92 NA | Room Air     | 0 |
| 95  | 24 NA | 92 NA | Nasal Cannul | 0 |
| 94  | 30 NA | 91 NA | Nasal Cannul | 0 |
| 146 | 40 NA | 64 NA | Ventilator   | 5 |
| 146 | 62 NA | 0 NA  | Ventilator   | 5 |
| 142 | 55 NA | 86 NA | Ventilator   | 5 |
| 120 | 26 NA | 95 NA | Nasal Cannul | 0 |
| 102 | 26 NA | 86 NA | Nasal Cannul | 0 |
| 98  | 30 NA | 90 NA | Nasal Cannul | 0 |
| 99  | 22 NA | 96 NA | Room Air     | 0 |

|     |       |       |              |   |
|-----|-------|-------|--------------|---|
| 96  | 28 NA | 91 NA | Nasal Cannul | 0 |
| 120 | 27 NA | 96 NA | Room Air     | 0 |
| 106 | 34 NA | 85 NA | Non-Rebreat  | 5 |
| 125 | 20 NA | 95 NA | Room Air     | 0 |
| 134 | 52 NA | 87 NA | Ventilator   | 5 |
| 110 | 22 NA | 92 NA | Nasal Cannul | 0 |
| 93  | 37 NA | 77 NA | Room Air     | 0 |
| 101 | 28 NA | 92 NA | Nasal Cannul | 0 |
| 96  | 26 NA | 89 NA | Venti Mask   | 5 |
| 96  | 26 NA | 92 NA | Room Air     | 0 |
| 99  | 20 NA | 88 NA | Nasal Cannul | 0 |
| 96  | 25 NA | 92 NA | Nasal Cannul | 0 |
| 107 | 55 NA | 62 NA | Ventilator   | 5 |
| 108 | 42 NA | 90 NA | Venti Mask   | 5 |
| 79  | 22 NA | 96 NA | Nasal Cannul | 0 |
| 117 | 30 NA | 85 NA | High-Flow    | 5 |
| 76  | 25 NA | 94 NA | Room Air     | 0 |
| 139 | 36 NA | 80 NA | Non-Rebreat  | 5 |
| 156 | 57 NA | 79 NA | NIPPV (CPAP  | 5 |
| 84  | 22 NA | 94 NA | Room Air     | 0 |
| 139 | 65 NA | 68 NA | Ventilator   | 5 |
| 114 | 24 NA | 89 NA | Nasal Cannul | 0 |
| 129 | 34 NA | 19 NA | Ventilator   | 5 |
| 109 | 36 NA | 84 NA | High-Flow    | 5 |
| 101 | 20 NA | 92 NA | Room Air     | 0 |
| 115 | 24 NA | 92 NA | Room Air     | 0 |
| 126 | 44 NA | 85 NA | Ventilator   | 5 |
| 113 | 42 NA | 86 NA | Nasal Cannul | 0 |
| 75  | 22 NA | 80 NA | Venti Mask   | 5 |
| 107 | 26 NA | 91 NA | Room Air     | 0 |
| 107 | 41 NA | 89 NA | Nasal Cannul | 0 |
| 141 | 50 NA | 0 NA  | Ventilator   | 5 |
| 166 | 30 NA | 90 NA | Nasal Cannul | 0 |
| 140 | 47 NA | 50 NA | Ventilator   | 5 |
| 130 | 38 NA | 91 NA | Venti Mask   | 5 |
| 159 | 52 NA | 84 NA | High-Flow    | 5 |
| 82  | 20 NA | 92 NA | Room Air     | 0 |
| 100 | 60 NA | 81 NA | High-Flow    | 5 |
| 104 | 26 NA | 83 NA | Nasal Cannul | 0 |
| 101 | 51 NA | 81 NA | Ventilator   | 5 |
| 99  | 21 NA | 95 NA | Room Air     | 0 |
| 110 | 42 NA | 90 NA | Venti Mask   | 5 |
| 80  | 30 NA | 90 NA | Nasal Cannul | 0 |
| 134 | 41 NA | 74 NA | Non-Rebreat  | 5 |
| 130 | 20 NA | 87 NA | Room Air     | 0 |

|     |        |       |              |   |
|-----|--------|-------|--------------|---|
| 99  | 34 NA  | 87 NA | Venti Mask   | 5 |
| 100 | 24 NA  | 97 NA | Room Air     | 0 |
| 99  | 19 NA  | 94 NA | Room Air     | 0 |
| 104 | 102 NA | 5 NA  | Ventilator   | 5 |
| 121 | 41 NA  | 84 NA | Non-Rebreat  | 5 |
| 120 | 20 NA  | 91 NA | Nasal Cannul | 0 |
| 117 | 30 NA  | 82 NA | Venti Mask   | 5 |
| 156 | 36 NA  | 9 NA  | Ventilator   | 5 |
| 115 | 32 NA  | 91 NA | Nasal Cannul | 0 |
| 130 | 90 NA  | 33 NA | Ventilator   | 5 |
| 129 | 92 NA  | 36 NA | Ventilator   | 5 |
| 156 | 59 NA  | 66 NA | Ventilator   | 5 |
| 138 | 58 NA  | 29 NA | Ventilator   | 5 |
| 79  | 22 NA  | 93 NA | Nasal Cannul | 0 |
| 100 | 32 NA  | 90 NA | Nasal Cannul | 0 |
| 133 | 53 NA  | 42 NA | Ventilator   | 5 |
| 116 | 30 NA  | 78 NA | Non-Rebreat  | 5 |
| 89  | 30 NA  | 88 NA | Nasal Cannul | 0 |
| 150 | 30 NA  | 74 NA | Venti Mask   | 5 |
| 90  | 24 NA  | 9 NA  | Nasal Cannul | 0 |
| 94  | 38 NA  | 91 NA | Nasal Cannul | 0 |
| 143 | 22 NA  | 96 NA | Room Air     | 0 |
| 105 | 29 NA  | 85 NA | Venti Mask   | 5 |
| 93  | 39 NA  | 92 NA | Ventilator   | 5 |
| 81  | 20 NA  | 86 NA | Room Air     | 0 |
| 96  | 22 NA  | 92 NA | Room Air     | 0 |
| 145 | 50 NA  | 29 NA | Ventilator   | 5 |
| 110 | 40 NA  | 60 NA | NIPPV (CPAP  | 5 |
| 112 | 36 NA  | 86 NA | Non-Rebreat  | 5 |
| 124 | 93 NA  | 35 NA | Ventilator   | 5 |
| 115 | 28 NA  | 88 NA | Venti Mask   | 5 |
| 95  | 30 NA  | 89 NA | Nasal Cannul | 0 |
| 86  | 24 NA  | 93 NA | Nasal Cannul | 0 |
| 102 | 40 NA  | 74 NA | Non-Rebreat  | 5 |
| 156 | 136 NA | 61 NA | Ventilator   | 5 |
| 116 | 37 NA  | 82 NA | NIPPV (CPAP  | 5 |
| 109 | 22 NA  | 92 NA | Nasal Cannul | 0 |
| 112 | 24 NA  | 90 NA | Nasal Cannul | 0 |
| 97  | 24 NA  | 97 NA | Room Air     | 0 |
| 96  | 40 NA  | 85 NA | Non-Rebreat  | 5 |
| 104 | 24 NA  | 85 NA | Non-Rebreat  | 5 |
| 91  | 22 NA  | 96 NA | Room Air     | 0 |
| 116 | 28 NA  | 90 NA | Nasal Cannul | 0 |
| 103 | 22 NA  | 91 NA | Nasal Cannul | 0 |
| 184 | 56 NA  | 53 NA | Ventilator   | 5 |

|     |       |       |              |   |
|-----|-------|-------|--------------|---|
| 90  | 32 NA | 96 NA | Room Air     | 0 |
| 122 | 53 NA | 86 NA | Ventilator   | 5 |
| 124 | 44 NA | 76 NA | Non-Rebreat  | 5 |
| 100 | 28 NA | 88 NA | Nasal Cannul | 0 |
| 94  | 28 NA | 88 NA | Venti Mask   | 5 |
| 124 | 61 NA | 22 NA | Ventilator   | 5 |
| 80  | 20 NA | 97 NA | Room Air     | 0 |
| 156 | 52 NA | 25 NA | Ventilator   | 5 |
| 107 | 32 NA | 91 NA | Nasal Cannul | 0 |
| 117 | 29 NA | 90 NA | Nasal Cannul | 0 |
| 131 | 41 NA | 82 NA | Non-Rebreat  | 5 |
| 124 | 36 NA | 90 NA | High-Flow    | 5 |
| 84  | 26 NA | 95 NA | Room Air     | 0 |
| 103 | 24 NA | 82 NA | Nasal Cannul | 0 |
| 99  | 22 NA | 94 NA | Room Air     | 0 |
| 120 | 36 NA | 84 NA | Nasal Cannul | 0 |
| 81  | 22 NA | 92 NA | Nasal Cannul | 0 |
| 89  | 26 NA | 94 NA | Nasal Cannul | 0 |
| 104 | 24 NA | 93 NA | Nasal Cannul | 0 |
| 129 | 25 NA | 93 NA | Nasal Cannul | 0 |
| 148 | 34 NA | 78 NA | Non-Rebreat  | 5 |
| 128 | 29 NA | 92 NA | Nasal Cannul | 0 |
| 100 | 30 NA | 74 NA | Non-Rebreat  | 5 |
| 170 | 33 NA | 90 NA | Non-Rebreat  | 5 |
| 98  | 28 NA | 93 NA | Nasal Cannul | 0 |
| 75  | 25 NA | 93 NA | Nasal Cannul | 0 |
| 101 | 30 NA | 91 NA | Nasal Cannul | 0 |
| 112 | 22 NA | 90 NA | Room Air     | 0 |
| 110 | 28 NA | 85 NA | Non-Rebreat  | 5 |
| 147 | 85 NA | 77 NA | Ventilator   | 5 |
| 105 | 36 NA | 88 NA | Nasal Cannul | 0 |
| 94  | 22 NA | 96 NA | Room Air     | 0 |
| 114 | 24 NA | 78 NA | Nasal Cannul | 0 |
| 99  | 32 NA | 90 NA | Non-Rebreat  | 5 |
| 97  | 26 NA | 77 NA | Nasal Cannul | 0 |
| 107 | 22 NA | 92 NA | Nasal Cannul | 0 |
| 108 | 56 NA | 40 NA | Ventilator   | 5 |
| 166 | 54 NA | 41 NA | Ventilator   | 5 |
| 122 | 26 NA | 90 NA | Nasal Cannul | 0 |
| 127 | 27 NA | 93 NA | Nasal Cannul | 0 |
| 96  | 28 NA | 87 NA | Nasal Cannul | 0 |
| 108 | 40 NA | 90 NA | Nasal Cannul | 0 |
| 97  | 22 NA | 92 NA | Nasal Cannul | 0 |
| 95  | 30 NA | 94 NA | Room Air     | 0 |
| 94  | 25 NA | 93 NA | Room Air     | 0 |

|     |       |       |              |   |
|-----|-------|-------|--------------|---|
| 100 | 36 NA | 94 NA | Nasal Cannul | 0 |
| 72  | 28 NA | 91 NA | Room Air     | 0 |
| 92  | 28 NA | 92 NA | Nasal Cannul | 0 |
| 163 | 45 NA | 79 NA | Ventilator   | 5 |
| 138 | 57 NA | 70 NA | Ventilator   | 5 |
| 99  | 36 NA | 74 NA | Non-Rebreat  | 5 |
| 163 | 28 NA | 91 NA | Nasal Cannul | 0 |







|    |          |     |     |    |     |     |
|----|----------|-----|-----|----|-----|-----|
| NA | Complete | No  | No  | No | No  | No  |
| NA | Complete | No  | Yes | No | No  | No  |
| NA | Complete | Yes | No  | No | No  | No  |
| NA | Complete | No  | No  | No | No  | No  |
| NA | Complete | No  | No  | No | No  | No  |
| NA | Complete | No  | No  | No | No  | No  |
| NA | Complete | No  | No  | No | No  | No  |
| NA | Complete | No  | No  | No | No  | No  |
| NA | Complete | No  | No  | No | No  | No  |
| NA | Complete | No  | No  | No | No  | No  |
| NA | Complete | No  | No  | No | No  | No  |
| NA | Complete | No  | No  | No | No  | No  |
| NA | Complete | Yes | No  | No | No  | No  |
| NA | Complete | No  | No  | No | No  | No  |
| NA | Complete | No  | No  | No | No  | No  |
| NA | Complete | No  | No  | No | No  | No  |
| NA | Complete | No  | No  | No | No  | No  |
| NA | Complete | No  | No  | No | No  | No  |
| NA | Complete | No  | No  | No | No  | No  |
| NA | Complete | No  | No  | No | No  | No  |
| NA | Complete | Yes | No  | No | No  | No  |
| NA | Complete | No  | No  | No | No  | No  |
| NA | Complete | No  | No  | No | No  | No  |
| NA | Complete | No  | No  | No | No  | No  |
| NA | Complete | Yes | Yes | No | Yes | No  |
| NA | Complete | No  | No  | No | No  | No  |
| NA | Complete | No  | No  | No | No  | NA  |
| NA | Complete | No  | No  | No | No  | No  |
| NA | Complete | Yes | Yes | No | No  | No  |
| NA | Complete | No  | No  | No | No  | No  |
| NA | Complete | Yes | Yes | No | No  | Yes |
| NA | Complete | No  | No  | No | No  | No  |
| NA | Complete | No  | No  | No | No  | No  |
| NA | Complete | No  | No  | No | No  | No  |
| NA | Complete | No  | No  | No | No  | No  |
| NA | Complete | No  | Yes | No | No  | No  |
| NA | Complete | No  | No  | No | No  | No  |
| NA | Complete | No  | Yes | No | No  | No  |
| NA | Complete | No  | No  | No | No  | No  |
| NA | Complete | No  | No  | No | No  | No  |
| NA | Complete | No  | No  | No | No  | No  |
| NA | Complete | No  | No  | No | No  | No  |

|    |          |     |     |    |    |     |
|----|----------|-----|-----|----|----|-----|
| NA | Complete | No  | No  | No | No | No  |
| NA | Complete | No  | No  | No | No | No  |
| NA | Complete | No  | No  | No | No | No  |
| NA | Complete | No  | No  | No | No | No  |
| NA | Complete | No  | No  | No | No | No  |
| NA | Complete | No  | No  | No | No | No  |
| NA | Complete | No  | No  | No | No | No  |
| NA | Complete | No  | No  | No | No | No  |
| NA | Complete | No  | No  | No | No | No  |
| NA | Complete | No  | No  | No | No | No  |
| NA | Complete | No  | No  | No | No | No  |
| NA | Complete | No  | No  | No | No | No  |
| NA | Complete | No  | No  | No | No | No  |
| NA | Complete | No  | No  | No | No | No  |
| NA | Complete | No  | No  | No | No | No  |
| NA | Complete | Yes | Yes | No | No | No  |
| NA | Complete | No  | No  | No | No | No  |
| NA | Complete | Yes | Yes | No | No | No  |
| NA | Complete | No  | No  | No | No | No  |
| NA | Complete | No  | No  | No | No | Yes |
| NA | Complete | Yes | No  | No | No | No  |
| NA | Complete | No  | No  | No | No | No  |
| NA | Complete | No  | No  | No | No | No  |
| NA | Complete | No  | No  | No | No | No  |
| NA | Complete | No  | No  | No | No | Yes |
| NA | Complete | Yes | No  | No | No | Yes |
| NA | Complete | No  | No  | No | No | NA  |
| NA | Complete | No  | No  | No | No | No  |
| NA | Complete | Yes | No  | No | No | No  |
| NA | Complete | No  | No  | No | No | No  |
| NA | Complete | No  | No  | No | No | No  |
| NA | Complete | No  | No  | No | No | No  |
| NA | Complete | No  | No  | No | No | No  |
| NA | Complete | No  | No  | No | No | No  |
| NA | Complete | No  | No  | No | No | No  |
| NA | Complete | No  | No  | No | No | No  |
| NA | Complete | No  | No  | No | No | No  |
| NA | Complete | No  | No  | No | No | No  |
| NA | Complete | No  | No  | No | No | No  |
| NA | Complete | No  | No  | No | No | Yes |
| NA | Complete | No  | No  | No | No | No  |
| NA | Complete | No  | No  | No | No | No  |
| NA | Complete | No  | No  | No | No | No  |
| NA | Complete | No  | No  | No | No | No  |

|    |          |     |     |    |     |     |
|----|----------|-----|-----|----|-----|-----|
| NA | Complete | No  | No  | No | No  | Yes |
| NA | Complete | No  | No  | No | No  | Yes |
| NA | Complete | No  | No  | No | No  | No  |
| NA | Complete | No  | No  | No | No  | No  |
| NA | Complete | No  | No  | No | No  | No  |
| NA | Complete | No  | No  | No | No  | No  |
| NA | Complete | Yes | Yes | No | No  | Yes |
| NA | Complete | No  | No  | No | No  | No  |
| NA | Complete | No  | No  | No | No  | No  |
| NA | Complete | Yes | Yes | No | Yes | Yes |
| NA | Complete | No  | No  | No | No  | No  |
| NA | Complete | Yes | Yes | No | No  | No  |
| NA | Complete | No  | No  | No | No  | No  |
| NA | Complete | No  | No  | No | No  | No  |
| NA | Complete | No  | No  | No | No  | No  |
| NA | Complete | No  | No  | No | No  | No  |
| NA | Complete | No  | No  | No | No  | No  |
| NA | Complete | No  | No  | No | No  | No  |
| NA | Complete | Yes | No  | No | No  | No  |
| NA | Complete | Yes | Yes | No | No  | Yes |
| NA | Complete | No  | No  | No | No  | No  |
| NA | Complete | No  | No  | No | No  | No  |
| NA | Complete | No  | No  | No | No  | No  |
| NA | Complete | No  | Yes | No | No  | No  |
| NA | Complete | No  | No  | No | No  | No  |
| NA | Complete | Yes | No  | No | No  | No  |
| NA | Complete | No  | No  | No | No  | No  |
| NA | Complete | No  | No  | No | No  | No  |
| NA | Complete | No  | No  | No | No  | No  |
| NA | Complete | No  | No  | No | No  | No  |
| NA | Complete | No  | No  | No | No  | No  |
| NA | Complete | No  | No  | No | No  | No  |
| NA | Complete | No  | No  | No | No  | No  |
| NA | Complete | No  | Yes | No | No  | No  |
| NA | Complete | No  | No  | No | No  | No  |
| NA | Complete | No  | No  | No | No  | No  |
| NA | Complete | No  | No  | No | No  | No  |

|    |          |     |     |    |    |     |
|----|----------|-----|-----|----|----|-----|
| NA | Complete | No  | Yes | No | No | No  |
| NA | Complete | NA  | No  | No | No | No  |
| NA | Complete | No  | No  | No | No | No  |
| NA | Complete | No  | No  | No | No | No  |
| NA | Complete | No  | No  | No | No | No  |
| NA | Complete | NA  | Yes | No | No | Yes |
| NA | Complete | No  | No  | No | No | No  |
| NA | Complete | Yes | Yes | No | No | Yes |
| NA | Complete | No  | No  | No | No | No  |
| NA | Complete | No  | No  | No | No | No  |
| NA | Complete | No  | No  | No | No | No  |
| NA | Complete | NA  | Yes | No | No | Yes |
| NA | Complete | No  | No  | No | No | No  |
| NA | Complete | No  | No  | No | No | No  |
| NA | Complete | Yes | No  | No | No | No  |
| NA | Complete | No  | No  | No | No | No  |
| NA | Complete | No  | No  | No | No | No  |
| NA | Complete | No  | No  | No | No | No  |
| NA | Complete | No  | No  | No | No | No  |
| NA | Complete | No  | No  | No | No | No  |
| NA | Complete | No  | No  | No | No | No  |
| NA | Complete | Yes | No  | No | No | No  |
| NA | Complete | No  | No  | No | No | No  |
| NA | Complete | No  | No  | No | No | No  |
| NA | Complete | No  | No  | No | No | No  |
| NA | Complete | No  | No  | No | No | No  |
| NA | Complete | No  | No  | No | No | No  |
| NA | Complete | No  | Yes | No | No | No  |
| NA | Complete | No  | No  | No | No | No  |
| NA | Complete | No  | No  | No | No | No  |
| NA | Complete | No  | No  | No | No | No  |
| NA | Complete | No  | No  | No | No | No  |
| NA | Complete | No  | No  | No | No | No  |
| NA | Complete | No  | No  | No | No | No  |
| NA | Complete | No  | No  | No | No | No  |
| NA | Complete | No  | No  | No | No | No  |
| NA | Complete | No  | No  | No | No | No  |
| NA | Complete | No  | Yes | No | No | No  |
| NA | Complete | No  | Yes | No | No | No  |
| NA | Complete | No  | No  | No | No | No  |
| NA | Complete | No  | No  | No | No | No  |
| NA | Complete | No  | No  | No | No | No  |
| NA | Complete | No  | No  | No | No | No  |
| NA | Complete | No  | Yes | No | No | No  |
| NA | Complete | No  | No  | No | No | No  |
| NA | Complete | No  | No  | No | No | No  |
| NA | Complete | Yes | No  | No | No | No  |

|    |          |     |     |    |     |     |
|----|----------|-----|-----|----|-----|-----|
| NA | Complete | No  | No  | No | No  | No  |
| NA | Complete | No  | No  | No | No  | No  |
| NA | Complete | No  | No  | No | No  | No  |
| NA | Complete | No  | No  | No | No  | No  |
| NA | Complete | No  | No  | No | No  | No  |
| NA | Complete | No  | No  | No | No  | No  |
| NA | Complete | No  | No  | No | No  | No  |
| NA | Complete | No  | No  | No | No  | No  |
| NA | Complete | No  | No  | No | No  | No  |
| NA | Complete | No  | No  | No | No  | No  |
| NA | Complete | No  | No  | No | No  | No  |
| NA | Complete | No  | No  | No | No  | No  |
| NA | Complete | No  | Yes | No | No  | Yes |
| NA | Complete | No  | No  | No | No  | No  |
| NA | Complete | No  | No  | No | No  | No  |
| NA | Complete | No  | No  | No | No  | No  |
| NA | Complete | No  | No  | No | No  | No  |
| NA | Complete | No  | No  | No | No  | No  |
| NA | Complete | Yes | No  | No | No  | No  |
| NA | Complete | No  | No  | No | No  | No  |
| NA | Complete | No  | No  | No | No  | No  |
| NA | Complete | No  | No  | No | No  | No  |
| NA | Complete | No  | No  | No | No  | No  |
| NA | Complete | No  | No  | No | No  | No  |
| NA | Complete | No  | No  | No | No  | No  |
| NA | Complete | No  | No  | No | No  | No  |
| NA | Complete | Yes | No  | No | No  | No  |
| NA | Complete | Yes | Yes | No | Yes | No  |
| NA | Complete | No  | No  | No | No  | No  |
| NA | Complete | No  | No  | No | No  | No  |
| NA | Complete | Yes | No  | No | No  | No  |
| NA | Complete | No  | No  | No | No  | No  |
| NA | Complete | No  | No  | No | No  | No  |
| NA | Complete | No  | No  | No | No  | No  |
| NA | Complete | Yes | No  | No | No  | No  |
| NA | Complete | No  | No  | No | No  | No  |
| NA | Complete | Yes | No  | No | No  | No  |
| NA | Complete | No  | No  | No | No  | No  |
| NA | Complete | NA  | Yes | No | No  | No  |
| NA | Complete | No  | No  | No | No  | No  |
| NA | Complete | Yes | No  | No | No  | No  |
| NA | Complete | No  | No  | No | No  | No  |
| NA | Complete | No  | No  | No | No  | No  |
| NA | Complete | No  | No  | No | No  | No  |

|    |          |     |     |     |     |     |
|----|----------|-----|-----|-----|-----|-----|
| NA | Complete | No  | No  | No  | No  | No  |
| NA | Complete | Yes | No  | No  | No  | No  |
| NA | Complete | No  | No  | No  | No  | No  |
| NA | Complete | No  | No  | No  | No  | No  |
| NA | Complete | No  | No  | No  | No  | No  |
| NA | Complete | No  | No  | No  | No  | No  |
| NA | Complete | No  | No  | No  | No  | No  |
| NA | Complete | No  | No  | No  | No  | No  |
| NA | Complete | No  | Yes | No  | No  | No  |
| NA | Complete | No  | No  | No  | No  | No  |
| NA | Complete | No  | No  | No  | No  | No  |
| NA | Complete | No  | No  | No  | No  | No  |
| NA | Complete | No  | No  | No  | No  | No  |
| NA | Complete | No  | No  | No  | No  | No  |
| NA | Complete | No  | No  | No  | No  | No  |
| NA | Complete | No  | No  | No  | No  | No  |
| NA | Complete | No  | No  | No  | No  | No  |
| NA | Complete | No  | No  | No  | No  | No  |
| NA | Complete | No  | No  | No  | No  | No  |
| NA | Complete | No  | No  | No  | No  | No  |
| NA | Complete | Yes | No  | No  | No  | No  |
| NA | Complete | Yes | No  | No  | No  | No  |
| NA | Complete | No  | No  | No  | No  | Yes |
| NA | Complete | Yes | No  | No  | No  | No  |
| NA | Complete | No  | No  | No  | No  | No  |
| NA | Complete | No  | No  | No  | No  | No  |
| NA | Complete | No  | No  | No  | No  | No  |
| NA | Complete | No  | No  | No  | No  | No  |
| NA | Complete | No  | No  | No  | No  | No  |
| NA | Complete | No  | No  | No  | No  | No  |
| NA | Complete | No  | No  | No  | No  | No  |
| NA | Complete | No  | No  | No  | No  | No  |
| NA | Complete | Yes | No  | No  | No  | No  |
| NA | Complete | Yes | Yes | No  | Yes | Yes |
| NA | Complete | No  | No  | No  | No  | No  |
| NA | Complete | No  | Yes | No  | No  | Yes |
| NA | Complete | No  | No  | No  | No  | No  |
| NA | Complete | No  | No  | No  | No  | No  |
| NA | Complete | No  | No  | No  | No  | No  |
| NA | Complete | No  | No  | No  | No  | No  |
| NA | Complete | Yes | Yes | Yes | No  | No  |
| NA | Complete | No  | No  | No  | No  | No  |

















|    |          |     |     |    |    |     |
|----|----------|-----|-----|----|----|-----|
| NA | Complete | No  | No  | No | No | No  |
| NA | Complete | No  | No  | No | No | No  |
| NA | Complete | No  | No  | No | No | No  |
| NA | Complete | No  | No  | No | No | No  |
| NA | Complete | No  | No  | No | No | No  |
| NA | Complete | No  | No  | No | No | No  |
| NA | Complete | Yes | Yes | No | No | No  |
| NA | Complete | No  | No  | No | No | No  |
| NA | Complete | No  | No  | No | No | No  |
| NA | Complete | No  | No  | No | No | No  |
| NA | Complete | Yes | No  | No | No | No  |
| NA | Complete | No  | No  | No | No | No  |
| NA | Complete | No  | No  | No | No | No  |
| NA | Complete | Yes | Yes | No | No | No  |
| NA | Complete | Yes | No  | No | No | No  |
| NA | Complete | No  | No  | No | No | No  |
| NA | Complete | No  | No  | No | No | No  |
| NA | Complete | Yes | No  | No | No | No  |
| NA | Complete | No  | No  | No | No | No  |
| NA | Complete | No  | No  | No | No | No  |
| NA | Complete | No  | Yes | No | No | No  |
| NA | Complete | No  | No  | No | No | No  |
| NA | Complete | No  | No  | No | No | No  |
| NA | Complete | Yes | Yes | No | No | Yes |
| NA | Complete | No  | No  | No | No | No  |
| NA | Complete | Yes | Yes | No | No | No  |
| NA | Complete | Yes | No  | No | No | No  |
| NA | Complete | No  | No  | No | No | No  |
| NA | Complete | No  | No  | No | No | No  |
| NA | Complete | No  | No  | No | No | No  |
| NA | Complete | No  | No  | No | No | No  |
| NA | Complete | No  | No  | No | No | No  |
| NA | Complete | No  | No  | No | No | No  |
| NA | Complete | No  | No  | No | No | No  |
| NA | Complete | Yes | Yes | No | No | Yes |
| NA | Complete | No  | No  | No | No | No  |
| NA | Complete | No  | No  | No | No | NA  |
| NA | Complete | No  | No  | No | No | No  |
| NA | Complete | No  | No  | No | No | No  |
| NA | Complete | No  | No  | No | No | No  |
| NA | Complete | No  | No  | No | No | No  |
| NA | Complete | Yes | Yes | No | No | Yes |
| NA | Complete | No  | No  | No | No | No  |
| NA | Complete | No  | No  | No | No | No  |
| NA | Complete | No  | No  | No | No | No  |



|    |          |     |     |     |     |     |
|----|----------|-----|-----|-----|-----|-----|
| NA | Complete | Yes | Yes | Yes | No  | No  |
| NA | Complete | No  | No  | No  | No  | No  |
| NA | Complete | No  | No  | No  | No  | No  |
| NA | Complete | No  | No  | No  | No  | No  |
| NA | Complete | No  | No  | No  | No  | No  |
| NA | Complete | No  | No  | No  | No  | No  |
| NA | Complete | No  | No  | No  | No  | No  |
| NA | Complete | No  | No  | No  | No  | No  |
| NA | Complete | No  | No  | No  | No  | No  |
| NA | Complete | No  | No  | No  | No  | No  |
| NA | Complete | No  | No  | No  | No  | No  |
| NA | Complete | No  | No  | No  | No  | No  |
| NA | Complete | Yes | Yes | No  | No  | Yes |
| NA | Complete | No  | No  | No  | No  | No  |
| NA | Complete | No  | No  | No  | No  | No  |
| NA | Complete | Yes | Yes | No  | Yes | Yes |
| NA | Complete | Yes | No  | No  | No  | No  |
| NA | Complete | No  | No  | No  | No  | No  |
| NA | Complete | No  | Yes | No  | No  | No  |
| NA | Complete | No  | No  | No  | No  | NA  |
| NA | Complete | No  | No  | No  | No  | No  |
| NA | Complete | No  | No  | No  | No  | No  |
| NA | Complete | No  | No  | No  | No  | No  |
| NA | Complete | No  | No  | No  | No  | No  |
| NA | Complete | No  | No  | No  | No  | No  |
| NA | Complete | Yes | Yes | No  | No  | Yes |
| NA | Complete | No  | No  | No  | No  | No  |
| NA | Complete | No  | No  | No  | No  | No  |
| NA | Complete | No  | No  | No  | No  | No  |
| NA | Complete | No  | No  | No  | No  | No  |
| NA | Complete | No  | No  | No  | No  | No  |
| NA | Complete | Yes | Yes | No  | No  | Yes |
| NA | Complete | No  | No  | No  | No  | NA  |
| NA | Complete | No  | No  | No  | No  | No  |
| NA | Complete | No  | No  | No  | No  | No  |
| NA | Complete | No  | Yes | No  | Yes | No  |
| NA | Complete | No  | No  | No  | No  | No  |
| NA | Complete | No  | No  | No  | No  | No  |
| NA | Complete | No  | Yes | Yes | No  | No  |
| NA | Complete | No  | No  | No  | No  | No  |
| NA | Complete | No  | No  | No  | No  | No  |
| NA | Complete | No  | No  | No  | No  | No  |
| NA | Complete | No  | No  | No  | No  | No  |
| NA | Complete | Yes | No  | No  | No  | No  |
| NA | Complete | No  | No  | No  | No  | No  |
| NA | Complete | No  | No  | No  | No  | No  |





|    |          |     |     |     |     |     |
|----|----------|-----|-----|-----|-----|-----|
| NA | Complete | No  | No  | No  | No  | No  |
| NA | Complete | No  | No  | No  | No  | No  |
| NA | Complete | No  | No  | No  | No  | NA  |
| NA | Complete | Yes | Yes | No  | No  | No  |
| NA | Complete | No  | No  | No  | No  | No  |
| NA | Complete | No  | No  | No  | No  | No  |
| NA | Complete | Yes | No  | No  | No  | No  |
| NA | Complete | Yes | Yes | NA  | Yes | Yes |
| NA | Complete | No  | No  | No  | No  | No  |
| NA | Complete | No  | No  | No  | No  | No  |
| NA | Complete | No  | No  | No  | No  | No  |
| NA | Complete | No  | No  | No  | No  | No  |
| NA | Complete | No  | No  | No  | No  | No  |
| NA | Complete | No  | Yes | No  | No  | No  |
| NA | Complete | No  | No  | No  | No  | No  |
| NA | Complete | No  | No  | No  | No  | No  |
| NA | Complete | Yes | No  | No  | No  | No  |
| NA | Complete | No  | No  | No  | No  | No  |
| NA | Complete | Yes | Yes | No  | No  | No  |
| NA | Complete | No  | No  | No  | No  | No  |
| NA | Complete | No  | No  | No  | No  | No  |
| NA | Complete | No  | No  | No  | No  | No  |
| NA | Complete | No  | No  | No  | No  | No  |
| NA | Complete | No  | No  | No  | No  | No  |
| NA | Complete | Yes | Yes | No  | No  | Yes |
| NA | Complete | Yes | No  | No  | No  | No  |
| NA | Complete | No  | No  | No  | No  | No  |
| NA | Complete | Yes | Yes | Yes | No  | Yes |
| NA | Complete | Yes | Yes | Yes | No  | Yes |
| NA | Complete | No  | No  | No  | No  | No  |
| NA | Complete | Yes | No  | No  | No  | No  |
| NA | Complete | No  | No  | No  | No  | No  |
| NA | Complete | No  | No  | No  | No  | No  |
| NA | Complete | Yes | Yes | No  | No  | Yes |
| NA | Complete | No  | No  | No  | No  | No  |
| NA | Complete | No  | No  | No  | No  | No  |
| NA | Complete | No  | No  | No  | No  | No  |
| NA | Complete | No  | No  | No  | No  | No  |
| NA | Complete | No  | No  | No  | No  | No  |
| NA | Complete | No  | No  | No  | No  | No  |
| NA | Complete | No  | No  | No  | No  | No  |
| NA | Complete | No  | No  | No  | No  | No  |
| NA | Complete | No  | No  | No  | No  | No  |
| NA | Complete | No  | No  | No  | No  | Yes |
| NA | Complete | No  | No  | No  | No  | No  |
| NA | Complete | No  | No  | No  | No  | No  |
| NA | Complete | No  | No  | No  | No  | No  |
| NA | Complete | No  | No  | No  | No  | No  |
| NA | Complete | No  | No  | No  | No  | Yes |





|    |          |     |     |     |     |     |
|----|----------|-----|-----|-----|-----|-----|
| NA | Complete | No  | No  | No  | No  | No  |
| NA | Complete | No  | Yes | No  | No  | No  |
| NA | Complete | No  | No  | No  | No  | No  |
| NA | Complete | No  | No  | No  | No  | No  |
| NA | Complete | No  | No  | No  | No  | No  |
| NA | Complete | No  | No  | No  | No  | No  |
| NA | Complete | No  | No  | No  | No  | No  |
| NA | Complete | No  | No  | No  | No  | No  |
| NA | Complete | Yes | No  | No  | No  | No  |
| NA | Complete | No  | No  | No  | No  | No  |
| NA | Complete | No  | No  | No  | No  | No  |
| NA | Complete | No  | No  | No  | No  | No  |
| NA | Complete | No  | No  | No  | No  | No  |
| NA | Complete | Yes | Yes | No  | Yes | No  |
| NA | Complete | Yes | Yes | No  | No  | No  |
| NA | Complete | Yes | Yes | No  | No  | Yes |
| NA | Complete | No  | No  | No  | No  | No  |
| NA | Complete | No  | No  | No  | No  | No  |
| NA | Complete | No  | No  | No  | No  | No  |
| NA | Complete | No  | No  | No  | No  | No  |
| NA | Complete | Yes | Yes | No  | Yes | No  |
| NA | Complete | No  | No  | No  | No  | No  |
| NA | Complete | No  | No  | No  | No  | No  |
| NA | Complete | No  | No  | No  | No  | No  |
| NA | Complete | No  | No  | No  | No  | No  |
| NA | Complete | No  | No  | No  | No  | No  |
| NA | Complete | No  | No  | No  | No  | No  |
| NA | Complete | No  | No  | No  | No  | No  |
| NA | Complete | No  | No  | No  | No  | No  |
| NA | Complete | No  | No  | No  | No  | No  |
| NA | Complete | No  | No  | No  | No  | No  |
| NA | Complete | No  | No  | No  | No  | No  |
| NA | Complete | No  | No  | No  | No  | No  |
| NA | Complete | No  | No  | No  | No  | No  |
| NA | Complete | No  | No  | No  | No  | No  |
| NA | Complete | Yes | Yes | No  | Yes | No  |
| NA | Complete | Yes | Yes | No  | Yes | Yes |
| NA | Complete | Yes | Yes | Yes | Yes | No  |
| NA | Complete | No  | No  | No  | No  | No  |
| NA | Complete | No  | No  | No  | No  | No  |
| NA | Complete | No  | No  | No  | No  | No  |
| NA | Complete | No  | No  | No  | No  | No  |

|    |          |     |     |    |     |     |
|----|----------|-----|-----|----|-----|-----|
| NA | Complete | No  | No  | No | No  | No  |
| NA | Complete | No  | No  | No | No  | No  |
| NA | Complete | No  | No  | No | No  | No  |
| NA | Complete | No  | No  | No | No  | No  |
| NA | Complete | Yes | Yes | No | Yes | No  |
| NA | Complete | No  | No  | No | No  | No  |
| NA | Complete | No  | No  | No | No  | No  |
| NA | Complete | No  | No  | No | No  | No  |
| NA | Complete | No  | No  | No | No  | No  |
| NA | Complete | No  | No  | No | No  | No  |
| NA | Complete | No  | No  | No | No  | No  |
| NA | Complete | No  | No  | No | No  | No  |
| NA | Complete | Yes | Yes | No | No  | No  |
| NA | Complete | No  | No  | No | No  | No  |
| NA | Complete | No  | No  | No | No  | No  |
| NA | Complete | No  | No  | No | No  | No  |
| NA | Complete | No  | No  | No | No  | No  |
| NA | Complete | No  | No  | No | No  | No  |
| NA | Complete | Yes | No  | No | No  | No  |
| NA | Complete | No  | No  | No | No  | No  |
| NA | Complete | Yes | Yes | No | No  | No  |
| NA | Complete | No  | No  | No | No  | No  |
| NA | Complete | Yes | Yes | No | No  | No  |
| NA | Complete | No  | No  | No | No  | No  |
| NA | Complete | No  | No  | No | No  | No  |
| NA | Complete | No  | No  | No | No  | No  |
| NA | Complete | No  | No  | No | No  | No  |
| NA | Complete | Yes | No  | No | No  | No  |
| NA | Complete | No  | No  | No | No  | No  |
| NA | Complete | No  | No  | No | No  | No  |
| NA | Complete | No  | No  | No | No  | No  |
| NA | Complete | No  | No  | No | No  | No  |
| NA | Complete | Yes | Yes | No | No  | Yes |
| NA | Complete | No  | No  | No | No  | No  |
| NA | Complete | Yes | Yes | No | No  | No  |
| NA | Complete | No  | No  | No | No  | No  |
| NA | Complete | No  | No  | No | No  | No  |
| NA | Complete | No  | No  | No | No  | No  |
| NA | Complete | No  | No  | No | No  | No  |
| NA | Complete | Yes | Yes | No | No  | Yes |
| NA | Complete | No  | No  | No | No  | No  |
| NA | Complete | No  | No  | No | No  | No  |
| NA | Complete | No  | No  | No | No  | No  |
| NA | Complete | No  | No  | No | No  | No  |
| NA | Complete | No  | No  | No | No  | No  |



|    |          |     |     |    |     |     |
|----|----------|-----|-----|----|-----|-----|
| NA | Complete | No  | No  | No | No  | No  |
| NA | Complete | No  | No  | No | No  | No  |
| NA | Complete | No  | No  | No | No  | No  |
| NA | Complete | Yes | Yes | No | No  | No  |
| NA | Complete | No  | No  | No | No  | No  |
| NA | Complete | No  | No  | No | No  | No  |
| NA | Complete | No  | No  | No | No  | No  |
| NA | Complete | Yes | Yes | No | No  | No  |
| NA | Complete | No  | No  | No | No  | No  |
| NA | Complete | Yes | Yes | No | No  | No  |
| NA | Complete | Yes | Yes | No | No  | Yes |
| NA | Complete | Yes | Yes | No | No  | Yes |
| NA | Complete | Yes | Yes | No | No  | No  |
| NA | Complete | No  | No  | No | No  | No  |
| NA | Complete | No  | No  | No | No  | No  |
| NA | Complete | No  | No  | No | No  | No  |
| NA | Complete | Yes | Yes | No | No  | No  |
| NA | Complete | No  | No  | No | No  | No  |
| NA | Complete | No  | No  | No | No  | No  |
| NA | Complete | No  | No  | No | No  | No  |
| NA | Complete | No  | No  | No | No  | No  |
| NA | Complete | No  | No  | No | No  | No  |
| NA | Complete | Yes | Yes | No | Yes | No  |
| NA | Complete | No  | No  | No | No  | No  |
| NA | Complete | No  | No  | No | No  | No  |
| NA | Complete | Yes | Yes | No | No  | Yes |
| NA | Complete | Yes | No  | No | No  | No  |
| NA | Complete | No  | No  | No | No  | No  |
| NA | Complete | Yes | Yes | No | Yes | Yes |
| NA | Complete | No  | No  | No | No  | No  |
| NA | Complete | No  | No  | No | No  | No  |
| NA | Complete | No  | No  | No | No  | No  |
| NA | Complete | No  | No  | No | No  | No  |
| NA | Complete | No  | Yes | No | No  | No  |
| NA | Complete | Yes | No  | No | No  | No  |
| NA | Complete | No  | No  | No | No  | No  |
| NA | Complete | No  | No  | No | No  | No  |
| NA | Complete | No  | No  | No | No  | No  |
| NA | Complete | No  | No  | No | No  | No  |
| NA | Complete | No  | No  | No | No  | No  |
| NA | Complete | No  | No  | No | No  | No  |
| NA | Complete | No  | No  | No | No  | No  |
| NA | Complete | No  | No  | No | No  | No  |
| NA | Complete | No  | No  | No | No  | No  |
| NA | Complete | No  | Yes | No | No  | No  |



|    |          |     |     |    |     |     |
|----|----------|-----|-----|----|-----|-----|
| NA | Complete | No  | No  | No | No  | No  |
| NA | Complete | No  | No  | No | No  | No  |
| NA | Complete | No  | No  | No | No  | No  |
| NA | Complete | Yes | Yes | No | No  | No  |
| NA | Complete | Yes | Yes | No | Yes | Yes |
| NA | Complete | No  | No  | No | No  | No  |
| NA | Complete | No  | No  | No | No  | Yes |



|              |     |    |    |     |    |     |
|--------------|-----|----|----|-----|----|-----|
| NA           | No  | NA | NA | No  | NA | No  |
| NA           | No  | NA | NA | Yes | NA | No  |
| NA           | No  | NA | NA | No  | NA | No  |
| NA           | No  | NA | NA | Yes | NA | No  |
| NA           | No  | NA | NA | No  | NA | Yes |
| Previous Con | No  | NA | NA | No  | NA | No  |
| NA           | No  | NA | NA | No  | NA | No  |
| NA           | Yes | No | No | Yes | NA | No  |
| NA           | Yes | No | No | No  | NA | No  |
| NA           | No  | NA | NA | No  | NA | No  |
| NA           | No  | NA | NA | No  | NA | Yes |
| NA           | No  | NA | NA | No  | NA | No  |
| Due to COVID | No  | NA | NA | No  | NA | Yes |
| NA           | No  | NA | NA | No  | NA | No  |
| NA           | No  | NA | NA | No  | NA | No  |
| NA           | Yes | No | No | No  | NA | Yes |
| NA           | No  | NA | NA | Yes | NA | Yes |
| NA           | No  | NA | NA | No  | NA | No  |
| NA           | No  | NA | NA | No  | NA | No  |
| NA           | No  | NA | NA | No  | NA | No  |
| NA           | No  | NA | NA | Yes | NA | No  |
| NA           | No  | NA | NA | No  | NA | Yes |
| NA           | No  | NA | NA | Yes | NA | Yes |
| NA           | No  | NA | NA | No  | NA | No  |
| NA           | No  | NA | NA | Yes | NA | No  |
| NA           | No  | NA | NA | Yes | NA | Yes |
| NA           | No  | NA | NA | No  | NA | No  |
| NA           | No  | NA | NA | No  | NA | No  |
| NA           | No  | NA | NA | No  | NA | No  |
| NA           | No  | NA | NA | No  | NA | No  |
| Due to COVID | No  | NA | NA | Yes | NA | Yes |
| NA           | No  | NA | NA | No  | NA | No  |
| NA           | No  | NA | NA | No  | NA | No  |
| NA           | No  | NA | NA | No  | NA | No  |
| Due to COVID | No  | NA | NA | Yes | NA | Yes |
| NA           | No  | NA | NA | No  | NA | No  |
| NA           | No  | NA | NA | No  | NA | No  |
| NA           | No  | NA | NA | No  | NA | No  |
| NA           | No  | NA | NA | No  | NA | No  |
| NA           | No  | NA | NA | Yes | NA | No  |
| NA           | No  | NA | NA | Yes | NA | Yes |
| NA           | No  | NA | NA | No  | NA | No  |

|              |     |    |     |     |    |     |
|--------------|-----|----|-----|-----|----|-----|
| NA           | No  | NA | NA  | No  | NA | No  |
| NA           | No  | NA | NA  | No  | NA | Yes |
| NA           | No  | NA | NA  | No  | NA | No  |
| NA           | No  | NA | NA  | No  | NA | No  |
| NA           | No  | NA | NA  | No  | NA | No  |
| NA           | No  | NA | NA  | No  | NA | No  |
| NA           | No  | NA | NA  | No  | NA | Yes |
| NA           | No  | NA | NA  | No  | NA | Yes |
| NA           | No  | NA | NA  | No  | NA | No  |
| NA           | No  | NA | NA  | Yes | NA | No  |
| NA           | No  | NA | NA  | No  | NA | No  |
| NA           | No  | NA | NA  | No  | NA | No  |
| NA           | No  | NA | NA  | No  | NA | No  |
| NA           | No  | NA | NA  | Yes | NA | Yes |
| NA           | No  | NA | NA  | No  | NA | No  |
| NA           | No  | NA | NA  | No  | NA | No  |
| NA           | No  | NA | NA  | No  | NA | No  |
| NA           | No  | NA | NA  | No  | NA | No  |
| NA           | No  | NA | NA  | No  | NA | No  |
| NA           | No  | NA | NA  | No  | NA | No  |
| NA           | No  | NA | NA  | No  | NA | No  |
| NA           | No  | NA | NA  | No  | NA | No  |
| NA           | No  | NA | NA  | No  | NA | No  |
| NA           | No  | NA | NA  | No  | NA | No  |
| NA           | Yes | No | No  | No  | NA | No  |
| NA           | No  | NA | NA  | No  | NA | No  |
| NA           | No  | NA | NA  | No  | NA | No  |
| NA           | No  | NA | NA  | No  | NA | No  |
| NA           | No  | NA | NA  | No  | NA | No  |
| NA           | No  | NA | NA  | No  | NA | No  |
| NA           | No  | NA | NA  | No  | NA | No  |
| NA           | No  | NA | NA  | No  | NA | No  |
| NA           | No  | NA | NA  | No  | NA | No  |
| NA           | Yes | No | Yes | No  | NA | Yes |
| NA           | No  | NA | NA  | No  | NA | Yes |
| NA           | No  | NA | NA  | Yes | NA | Yes |
| NA           | No  | NA | NA  | No  | NA | Yes |
| Due to COVID | No  | NA | NA  | Yes | NA | No  |
| NA           | No  | NA | NA  | No  | NA | Yes |
| NA           | No  | NA | NA  | No  | NA | No  |
| NA           | No  | NA | NA  | No  | NA | No  |
| NA           | No  | NA | NA  | No  | NA | No  |
| NA           | No  | NA | NA  | No  | NA | No  |
| NA           | Yes | No | Yes | No  | NA | Yes |
| NA           | No  | NA | NA  | No  | NA | Yes |
| NA           | No  | NA | NA  | Yes | NA | Yes |
| NA           | No  | NA | NA  | No  | NA | No  |
| NA           | No  | NA | NA  | No  | NA | No  |
| NA           | No  | NA | NA  | No  | NA | No  |
| NA           | No  | NA | NA  | No  | NA | No  |

|              |     |    |    |     |    |     |
|--------------|-----|----|----|-----|----|-----|
| NA           | No  | NA | NA | No  | NA | No  |
| NA           | No  | NA | NA | No  | NA | Yes |
| NA           | No  | NA | NA | No  | NA | Yes |
| NA           | No  | NA | NA | Yes | NA | No  |
| NA           | No  | NA | NA | No  | NA | No  |
| NA           | No  | NA | NA | No  | NA | Yes |
| NA           | No  | NA | NA | No  | NA | No  |
| NA           | No  | NA | NA | No  | NA | No  |
| NA           | No  | NA | NA | No  | NA | No  |
| NA           | No  | NA | NA | No  | NA | No  |
| NA           | No  | NA | NA | No  | NA | No  |
| NA           | No  | NA | NA | No  | NA | Yes |
| NA           | No  | NA | NA | No  | NA | No  |
| NA           | Yes | No | No | No  | NA | No  |
| NA           | No  | NA | NA | No  | NA | Yes |
| NA           | No  | NA | NA | Yes | NA | Yes |
| NA           | No  | NA | NA | No  | NA | No  |
| Previous Con | No  | NA | NA | No  | NA | No  |
| NA           | No  | NA | NA | No  | NA | Yes |
| NA           | No  | NA | NA | No  | NA | Yes |
| NA           | No  | NA | NA | No  | NA | No  |
| NA           | No  | NA | NA | No  | NA | No  |
| Previous Con | No  | NA | NA | No  | NA | No  |
| Previous Con | No  | NA | NA | No  | NA | No  |
| NA           | No  | NA | NA | Yes | NA | No  |
| NA           | No  | NA | NA | No  | NA | No  |
| NA           | No  | NA | NA | No  | NA | No  |
| NA           | No  | NA | NA | No  | NA | No  |
| NA           | No  | NA | NA | No  | NA | No  |
| NA           | No  | NA | NA | No  | NA | No  |
| NA           | No  | NA | NA | No  | NA | No  |
| NA           | No  | NA | NA | No  | NA | No  |
| NA           | No  | NA | NA | No  | NA | No  |
| NA           | No  | NA | NA | No  | NA | No  |
| NA           | No  | NA | NA | No  | NA | No  |
| NA           | No  | NA | NA | No  | NA | No  |
| NA           | No  | NA | NA | No  | NA | No  |
| NA           | No  | NA | NA | No  | NA | No  |
| NA           | No  | NA | NA | No  | NA | No  |
| NA           | No  | NA | NA | No  | NA | No  |
| NA           | No  | NA | NA | No  | NA | No  |
| NA           | No  | NA | NA | No  | NA | No  |
| NA           | No  | NA | NA | No  | NA | Yes |
| NA           | Yes | No | No | No  | NA | No  |
| NA           | Yes | No | No | No  | NA | No  |
| NA           | No  | NA | NA | Yes | NA | Yes |
| NA           | No  | NA | NA | No  | NA | No  |
| NA           | No  | NA | NA | No  | NA | No  |
| Previous Con | No  | NA | NA | No  | NA | No  |
| NA           | No  | NA | NA | No  | NA | No  |
| NA           | No  | NA | NA | No  | NA | Yes |
| NA           | Yes | No | No | No  | NA | No  |
| NA           | No  | NA | NA | No  | NA | No  |

|              |     |    |     |     |    |     |
|--------------|-----|----|-----|-----|----|-----|
| Previous Con | No  | NA | NA  | No  | NA | No  |
| Previous Con | No  | NA | NA  | No  | NA | No  |
| NA           | No  | NA | NA  | No  | NA | No  |
| NA           | No  | NA | NA  | No  | NA | No  |
| NA           | No  | NA | NA  | No  | NA | No  |
| NA           | No  | NA | NA  | No  | NA | Yes |
| Due to COVIL | No  | NA | NA  | No  | NA | Yes |
| NA           | No  | NA | NA  | No  | NA | No  |
| NA           | No  | NA | NA  | No  | NA | No  |
| Due to COVIL | Yes | No | Yes | No  | NA | Yes |
| NA           | No  | NA | NA  | No  | Y  | No  |
| NA           | No  | NA | NA  | No  | NA | Yes |
| NA           | No  | NA | NA  | No  | NA | No  |
| NA           | No  | NA | NA  | No  | NA | Yes |
| NA           | No  | NA | NA  | No  | NA | No  |
| NA           | No  | NA | NA  | No  | NA | No  |
| NA           | No  | NA | NA  | No  | NA | No  |
| NA           | No  | NA | NA  | No  | NA | No  |
| NA           | No  | NA | NA  | No  | NA | No  |
| NA           | No  | NA | NA  | No  | NA | No  |
| NA           | No  | NA | NA  | No  | NA | No  |
| NA           | No  | NA | NA  | No  | NA | No  |
| NA           | No  | NA | NA  | Yes | NA | Yes |
| NA           | No  | NA | NA  | No  | NA | No  |
| NA           | No  | NA | NA  | Yes | NA | No  |
| Due to COVIL | Yes | No | Yes | Yes | NA | Yes |
| Due to COVIL | Yes | No | Yes | No  | Y  | Yes |
| NA           | No  | NA | NA  | No  | NA | No  |
| NA           | No  | NA | NA  | No  | NA | No  |
| NA           | No  | NA | NA  | No  | NA | Yes |
| NA           | No  | NA | NA  | No  | NA | No  |
| NA           | No  | NA | NA  | No  | NA | No  |
| NA           | No  | NA | NA  | No  | NA | No  |
| NA           | No  | NA | NA  | No  | NA | No  |
| NA           | No  | NA | NA  | No  | NA | No  |
| NA           | No  | NA | NA  | No  | NA | No  |
| NA           | No  | NA | NA  | No  | NA | No  |
| NA           | No  | NA | NA  | No  | NA | No  |
| NA           | No  | NA | NA  | No  | NA | No  |
| NA           | No  | NA | NA  | No  | NA | No  |
| NA           | No  | NA | NA  | No  | NA | No  |
| NA           | No  | NA | NA  | No  | NA | No  |
| NA           | No  | NA | NA  | No  | NA | No  |
| NA           | No  | NA | NA  | No  | NA | Yes |
| NA           | No  | NA | NA  | No  | NA | No  |
| NA           | Yes | No | Yes | Yes | NA | No  |
| NA           | No  | NA | NA  | No  | NA | Yes |
| NA           | No  | NA | NA  | Yes | NA | Yes |
| NA           | No  | NA | NA  | No  | NA | No  |



|              |     |     |     |     |    |     |
|--------------|-----|-----|-----|-----|----|-----|
| NA           | No  | NA  | NA  | No  | NA | Yes |
| NA           | No  | NA  | NA  | No  | NA | No  |
| NA           | No  | NA  | NA  | No  | NA | No  |
| NA           | No  | NA  | NA  | No  | NA | No  |
| NA           | Yes | No  | No  | Yes | NA | No  |
| Due to COVID | No  | NA  | NA  | No  | NA | No  |
| NA           | Yes | No  | No  | Yes | NA | No  |
| Due to COVID | Yes | No  | Yes | Yes | NA | No  |
| NA           | No  | NA  | NA  | No  | Y  | No  |
| NA           | No  | NA  | NA  | No  | NA | No  |
| NA           | No  | NA  | NA  | No  | NA | No  |
| Due to COVID | No  | NA  | NA  | No  | NA | Yes |
| NA           | No  | NA  | NA  | No  | NA | No  |
| NA           | No  | NA  | NA  | No  | NA | Yes |
| NA           | No  | NA  | NA  | No  | NA | Yes |
| NA           | No  | NA  | NA  | Yes | NA | Yes |
| NA           | No  | NA  | NA  | No  | NA | Yes |
| NA           | No  | NA  | NA  | Yes | NA | No  |
| NA           | No  | NA  | NA  | No  | NA | Yes |
| NA           | No  | NA  | NA  | No  | NA | Yes |
| NA           | No  | NA  | NA  | Yes | NA | No  |
| Previous Con | No  | NA  | NA  | No  | NA | No  |
| Previous Con | Yes | Yes | No  | No  | NA | No  |
| NA           | No  | NA  | NA  | No  | NA | No  |
| NA           | No  | NA  | NA  | No  | NA | No  |
| NA           | No  | NA  | NA  | No  | NA | No  |
| Previous Con | No  | NA  | NA  | No  | NA | No  |
| NA           | No  | NA  | NA  | No  | NA | No  |
| NA           | No  | NA  | NA  | No  | NA | No  |
| NA           | No  | NA  | NA  | No  | NA | No  |
| NA           | No  | NA  | NA  | No  | NA | Yes |
| NA           | No  | NA  | NA  | Yes | NA | No  |
| NA           | No  | NA  | NA  | No  | NA | No  |
| NA           | No  | NA  | NA  | No  | NA | Yes |
| NA           | No  | NA  | NA  | No  | NA | Yes |
| NA           | No  | NA  | NA  | No  | NA | No  |
| NA           | No  | NA  | NA  | No  | NA | No  |
| NA           | Yes | No  | No  | No  | NA | No  |
| NA           | No  | NA  | NA  | No  | NA | No  |
| NA           | No  | NA  | NA  | No  | NA | No  |
| NA           | No  | NA  | NA  | No  | NA | No  |
| NA           | No  | NA  | NA  | No  | NA | Yes |
| NA           | No  | NA  | NA  | No  | NA | No  |
| NA           | No  | NA  | NA  | No  | NA | Yes |
| NA           | No  | NA  | NA  | No  | NA | No  |
| NA           | No  | NA  | NA  | No  | NA | Yes |
| NA           | No  | NA  | NA  | No  | NA | Yes |

|              |     |    |    |     |    |     |
|--------------|-----|----|----|-----|----|-----|
| NA           | No  | NA | NA | No  | NA | No  |
| NA           | No  | NA | NA | No  | NA | No  |
| NA           | Yes | No | No | Yes | NA | Yes |
| NA           | No  | NA | NA | Yes | NA | No  |
| NA           | No  | NA | NA | No  | NA | No  |
| NA           | No  | NA | NA | No  | NA | No  |
| NA           | No  | NA | NA | No  | NA | Yes |
| NA           | No  | NA | NA | No  | NA | No  |
| NA           | No  | NA | NA | No  | NA | No  |
| NA           | No  | NA | NA | No  | NA | No  |
| NA           | No  | NA | NA | No  | NA | No  |
| NA           | No  | NA | NA | No  | NA | No  |
| NA           | No  | NA | NA | No  | NA | No  |
| Due to COVID | Yes | No | No | Yes | NA | No  |
| NA           | No  | NA | NA | No  | Y  | Yes |
| NA           | No  | NA | NA | No  | NA | No  |
| NA           | No  | NA | NA | No  | NA | No  |
| NA           | No  | NA | NA | No  | NA | No  |
| NA           | No  | NA | NA | No  | NA | No  |
| NA           | No  | NA | NA | No  | NA | No  |
| NA           | No  | NA | NA | No  | NA | No  |
| NA           | No  | NA | NA | No  | NA | No  |
| NA           | No  | NA | NA | No  | NA | No  |
| NA           | No  | NA | NA | Yes | NA | No  |
| NA           | No  | NA | NA | No  | NA | Yes |
| NA           | No  | NA | NA | No  | NA | No  |
| NA           | No  | NA | NA | No  | NA | No  |
| NA           | No  | NA | NA | No  | NA | No  |
| NA           | No  | NA | NA | No  | NA | No  |
| NA           | No  | NA | NA | No  | NA | No  |
| NA           | No  | NA | NA | No  | NA | No  |
| NA           | No  | NA | NA | No  | NA | No  |
| NA           | No  | NA | NA | No  | NA | No  |
| NA           | No  | NA | NA | No  | NA | Yes |
| NA           | Yes | No | No | No  | NA | No  |
| NA           | No  | NA | NA | No  | NA | No  |
| NA           | No  | NA | NA | Yes | NA | Yes |
| NA           | No  | NA | NA | Yes | NA | No  |
| NA           | No  | NA | NA | Yes | NA | Yes |
| NA           | No  | NA | NA | No  | NA | No  |
| NA           | No  | NA | NA | No  | NA | No  |
| NA           | No  | NA | NA | No  | NA | No  |

|              |     |     |     |     |    |     |
|--------------|-----|-----|-----|-----|----|-----|
| NA           | No  | NA  | NA  | No  | NA | No  |
| NA           | Yes | No  | No  | No  | NA | Yes |
| NA           | No  | NA  | NA  | No  | NA | Yes |
| NA           | No  | NA  | NA  | No  | NA | No  |
| NA           | No  | NA  | NA  | No  | NA | No  |
| NA           | No  | NA  | NA  | No  | NA | No  |
| NA           | No  | NA  | NA  | No  | NA | No  |
| NA           | No  | NA  | NA  | No  | NA | Yes |
| NA           | Yes | No  | No  | Yes | NA | No  |
| NA           | No  | NA  | NA  | No  | Y  | Yes |
| NA           | No  | NA  | NA  | No  | NA | Yes |
| NA           | No  | NA  | NA  | No  | NA | No  |
| NA           | No  | NA  | NA  | No  | NA | Yes |
| NA           | No  | NA  | NA  | No  | NA | Yes |
| NA           | No  | NA  | NA  | No  | NA | No  |
| NA           | No  | NA  | NA  | No  | NA | No  |
| NA           | No  | NA  | NA  | No  | NA | Yes |
| NA           | No  | NA  | NA  | No  | NA | No  |
| NA           | No  | NA  | NA  | No  | NA | No  |
| NA           | No  | NA  | NA  | No  | NA | No  |
| NA           | No  | NA  | NA  | No  | NA | No  |
| NA           | No  | NA  | NA  | No  | NA | No  |
| NA           | No  | NA  | NA  | No  | NA | No  |
| NA           | No  | NA  | NA  | No  | NA | No  |
| Previous Con | No  | NA  | NA  | No  | NA | No  |
| NA           | No  | NA  | NA  | Yes | NA | No  |
| NA           | No  | NA  | NA  | Yes | NA | No  |
| NA           | No  | NA  | NA  | Yes | NA | No  |
| NA           | No  | NA  | NA  | No  | NA | Yes |
| NA           | No  | NA  | NA  | No  | NA | No  |
| NA           | No  | NA  | NA  | No  | NA | Yes |
| NA           | No  | NA  | NA  | Yes | NA | Yes |
| NA           | No  | NA  | NA  | Yes | NA | No  |
| NA           | Yes | No  | No  | No  | NA | No  |
| NA           | No  | NA  | NA  | Yes | NA | Yes |
| NA           | No  | NA  | NA  | No  | NA | Yes |
| NA           | No  | NA  | NA  | No  | NA | No  |
| NA           | No  | NA  | NA  | No  | NA | No  |
| NA           | No  | NA  | NA  | No  | NA | Yes |
| Due to COVII | No  | NA  | NA  | Yes | NA | Yes |
| NA           | No  | NA  | NA  | No  | Y  | No  |
| Due to COVII | Yes | Yes | Yes | Yes | NA | Yes |
| NA           | No  | NA  | NA  | No  | NA | No  |
| NA           | No  | NA  | NA  | No  | NA | Yes |
| NA           | No  | NA  | NA  | No  | NA | No  |
| NA           | No  | NA  | NA  | Yes | NA | Yes |
| NA           | No  | NA  | NA  | No  | NA | Yes |
| NA           | Yes | No  | No  | Yes | NA | No  |

|              |     |    |     |     |    |     |
|--------------|-----|----|-----|-----|----|-----|
| NA           | Yes | No | No  | Yes | NA | Yes |
| NA           | No  | NA | NA  | No  | NA | No  |
| NA           | No  | NA | NA  | No  | NA | No  |
| NA           | No  | NA | NA  | No  | NA | No  |
| NA           | No  | NA | NA  | No  | NA | No  |
| NA           | No  | NA | NA  | No  | NA | No  |
| NA           | No  | NA | NA  | No  | NA | No  |
| NA           | No  | NA | NA  | No  | NA | Yes |
| NA           | No  | NA | NA  | No  | NA | Yes |
| NA           | No  | NA | NA  | No  | NA | No  |
| NA           | No  | NA | NA  | No  | NA | No  |
| NA           | No  | NA | NA  | No  | NA | No  |
| NA           | No  | NA | NA  | No  | NA | No  |
| NA           | No  | NA | NA  | No  | NA | No  |
| NA           | No  | NA | NA  | No  | NA | No  |
| NA           | No  | NA | NA  | No  | NA | No  |
| NA           | No  | NA | NA  | No  | NA | No  |
| NA           | No  | NA | NA  | No  | NA | No  |
| NA           | No  | NA | NA  | No  | NA | No  |
| NA           | No  | NA | NA  | Yes | NA | Yes |
| NA           | Yes | No | Yes | Yes | NA | Yes |
| NA           | No  | NA | NA  | No  | Y  | No  |
| NA           | No  | NA | NA  | No  | NA | No  |
| Previous Con | No  | NA | NA  | No  | NA | No  |
| NA           | Yes | No | No  | No  | NA | No  |
| NA           | No  | NA | NA  | No  | NA | No  |
| NA           | No  | NA | NA  | No  | NA | No  |
| NA           | No  | NA | NA  | No  | NA | No  |
| NA           | Yes | No | Yes | Yes | NA | Yes |
| NA           | No  | NA | NA  | No  | Y  | Yes |
| NA           | No  | NA | NA  | No  | NA | No  |
| NA           | No  | NA | NA  | No  | NA | Yes |
| NA           | No  | NA | NA  | Yes | NA | Yes |
| NA           | No  | NA | NA  | No  | NA | Yes |
| NA           | No  | NA | NA  | No  | NA | Yes |
| NA           | Yes | No | No  | Yes | NA | Yes |
| NA           | No  | NA | NA  | No  | NA | Yes |
| NA           | No  | NA | NA  | No  | NA | No  |
| Previous Con | No  | NA | NA  | No  | NA | No  |
| Previous Con | No  | NA | NA  | No  | NA | No  |
| NA           | No  | NA | NA  | No  | NA | No  |
| NA           | No  | NA | NA  | No  | NA | Yes |
| NA           | No  | NA | NA  | No  | NA | Yes |
| NA           | No  | NA | NA  | No  | NA | No  |
| NA           | No  | NA | NA  | No  | NA | No  |
| NA           | No  | NA | NA  | No  | NA | No  |
| NA           | No  | NA | NA  | No  | NA | No  |

|              |     |     |     |     |    |     |
|--------------|-----|-----|-----|-----|----|-----|
| NA           | No  | NA  | NA  | No  | NA | No  |
| NA           | No  | NA  | NA  | No  | NA | No  |
| NA           | No  | NA  | NA  | No  | NA | No  |
| NA           | No  | NA  | NA  | No  | NA | No  |
| Due to COVID | No  | NA  | NA  | No  | NA | Yes |
| NA           | No  | NA  | NA  | No  | NA | No  |
| NA           | No  | NA  | NA  | Yes | NA | Yes |
| NA           | No  | NA  | NA  | Yes | NA | No  |
| NA           | No  | NA  | NA  | No  | NA | No  |
| NA           | No  | NA  | NA  | Yes | NA | No  |
| Previous Con | Yes | Yes | No  | No  | NA | No  |
| NA           | No  | NA  | NA  | Yes | NA | Yes |
| NA           | No  | NA  | NA  | No  | NA | No  |
| Previous Con | No  | NA  | NA  | No  | NA | No  |
| NA           | Yes | No  | No  | Yes | NA | No  |
| NA           | No  | NA  | NA  | No  | NA | No  |
| NA           | No  | NA  | NA  | No  | NA | No  |
| Due to COVID | No  | NA  | NA  | Yes | NA | Yes |
| NA           | No  | NA  | NA  | Yes | Y  | Yes |
| NA           | No  | NA  | NA  | No  | NA | Yes |
| NA           | No  | NA  | NA  | No  | NA | No  |
| NA           | Yes | No  | No  | Yes | NA | No  |
| NA           | No  | NA  | NA  | No  | NA | No  |
| NA           | No  | NA  | NA  | No  | NA | Yes |
| NA           | No  | NA  | NA  | No  | NA | No  |
| NA           | No  | NA  | NA  | Yes | NA | Yes |
| NA           | No  | NA  | NA  | No  | NA | Yes |
| NA           | No  | NA  | NA  | Yes | NA | Yes |
| NA           | No  | NA  | NA  | No  | NA | No  |
| NA           | No  | NA  | NA  | No  | NA | No  |
| NA           | No  | NA  | NA  | Yes | NA | No  |
| NA           | No  | NA  | NA  | No  | NA | Yes |
| NA           | Yes | No  | No  | Yes | NA | No  |
| NA           | No  | NA  | NA  | No  | NA | No  |
| NA           | No  | NA  | NA  | No  | NA | Yes |
| Due to COVID | Yes | Yes | Yes | Yes | NA | Yes |
| NA           | No  | NA  | NA  | No  | Y  | Yes |
| NA           | No  | NA  | NA  | No  | NA | No  |
| NA           | No  | NA  | NA  | No  | NA | No  |
| NA           | No  | NA  | NA  | Yes | NA | Yes |
| NA           | No  | NA  | NA  | No  | NA | No  |
| Due to COVID | Yes | No  | No  | No  | NA | No  |
| NA           | No  | NA  | NA  | No  | Y  | Yes |
| NA           | No  | NA  | NA  | No  | NA | Yes |



|    |    |    |    |     |    |     |
|----|----|----|----|-----|----|-----|
| NA | No | NA | NA | No  | NA | Yes |
| NA | No | NA | NA | No  | NA | No  |
| NA | No | NA | NA | No  | NA | Yes |
| NA | No | NA | NA | No  | NA | No  |
| NA | No | NA | NA | No  | NA | No  |
| NA | No | NA | NA | No  | NA | No  |
| NA | No | NA | NA | No  | NA | No  |
| NA | No | NA | NA | No  | NA | No  |
| NA | No | NA | NA | Yes | NA | Yes |
| NA | No | NA | NA | No  | NA | No  |
| NA | No | NA | NA | No  | NA | No  |
| NA | No | NA | NA | No  | NA | No  |
| NA | No | NA | NA | No  | NA | Yes |
| NA | No | NA | NA | No  | NA | No  |
| NA | No | NA | NA | No  | NA | Yes |
| NA | No | NA | NA | No  | NA | No  |
| NA | No | NA | NA | No  | NA | No  |
| NA | No | NA | NA | No  | NA | No  |
| NA | No | NA | NA | No  | NA | No  |
| NA | No | NA | NA | No  | NA | No  |
| NA | No | NA | NA | No  | NA | No  |
| NA | No | NA | NA | Yes | NA | Yes |
| NA | No | NA | NA | No  | NA | Yes |
| NA | No | NA | NA | No  | NA | No  |
| NA | No | NA | NA | No  | NA | No  |
| NA | No | NA | NA | No  | NA | Yes |
| NA | No | NA | NA | No  | NA | No  |
| NA | No | NA | NA | No  | NA | No  |
| NA | No | NA | NA | No  | NA | No  |
| NA | No | NA | NA | No  | NA | No  |
| NA | No | NA | NA | No  | NA | No  |
| NA | No | NA | NA | No  | NA | Yes |
| NA | No | NA | NA | No  | NA | No  |
| NA | No | NA | NA | No  | NA | No  |
| NA | No | NA | NA | No  | NA | No  |
| NA | No | NA | NA | No  | NA | No  |
| NA | No | NA | NA | No  | NA | No  |
| NA | No | NA | NA | Yes | NA | No  |
| NA | No | NA | NA | No  | NA | No  |





|    |     |    |     |     |    |     |
|----|-----|----|-----|-----|----|-----|
| NA | No  | NA | NA  | No  | Y  | Yes |
| NA | No  | NA | NA  | No  | NA | No  |
| NA | No  | NA | NA  | No  | NA | No  |
| NA | No  | NA | NA  | Yes | NA | No  |
| NA | No  | NA | NA  | No  | NA | No  |
| NA | No  | NA | NA  | No  | NA | No  |
| NA | No  | NA | NA  | No  | NA | No  |
| NA | No  | NA | NA  | No  | NA | No  |
| NA | Yes | No | Yes | No  | NA | No  |
| NA | No  | NA | NA  | Yes | NA | Yes |
| NA | No  | NA | NA  | No  | NA | No  |
| NA | No  | NA | NA  | No  | NA | Yes |
| NA | No  | NA | NA  | No  | NA | No  |
| NA | No  | NA | NA  | Yes | NA | Yes |
| NA | Yes | No | Yes | Yes | NA | Yes |
| NA | No  | NA | NA  | No  | NA | Yes |
| NA | No  | NA | NA  | No  | NA | No  |
| NA | No  | NA | NA  | No  | NA | No  |
| NA | No  | NA | NA  | No  | NA | No  |
| NA | No  | NA | NA  | No  | NA | No  |
| NA | Yes | No | Yes | No  | NA | Yes |
| NA | No  | NA | NA  | No  | NA | No  |
| NA | No  | NA | NA  | No  | NA | No  |
| NA | No  | NA | NA  | No  | NA | No  |
| NA | No  | NA | NA  | No  | NA | No  |
| NA | No  | NA | NA  | No  | NA | No  |
| NA | No  | NA | NA  | No  | NA | No  |
| NA | No  | NA | NA  | No  | NA | No  |
| NA | No  | NA | NA  | No  | NA | No  |
| NA | No  | NA | NA  | No  | NA | No  |
| NA | No  | NA | NA  | Yes | NA | Yes |
| NA | No  | NA | NA  | No  | NA | No  |
| NA | No  | NA | NA  | No  | NA | No  |
| NA | No  | NA | NA  | No  | NA | No  |
| NA | No  | NA | NA  | No  | NA | No  |
| NA | No  | NA | NA  | No  | NA | No  |
| NA | No  | NA | NA  | No  | NA | No  |
| NA | No  | NA | NA  | No  | NA | No  |
| NA | No  | NA | NA  | No  | NA | No  |
| NA | No  | NA | NA  | No  | NA | No  |
| NA | Yes | No | No  | No  | NA | Yes |
| NA | No  | NA | NA  | No  | NA | Yes |
| NA | No  | NA | NA  | No  | NA | Yes |
| NA | No  | NA | NA  | No  | NA | No  |
| NA | Yes | No | No  | Yes | NA | Yes |
| NA | No  | NA | NA  | Yes | NA | Yes |
| NA | No  | NA | NA  | No  | NA | Yes |
| NA | Yes | No | No  | No  | NA | No  |
| NA | No  | NA | NA  | No  | NA | No  |
| NA | No  | NA | NA  | No  | NA | No  |

|              |     |    |     |     |    |     |
|--------------|-----|----|-----|-----|----|-----|
| NA           | No  | NA | NA  | No  | NA | Yes |
| NA           | No  | NA | NA  | No  | NA | No  |
| NA           | No  | NA | NA  | No  | NA | No  |
| NA           | No  | NA | NA  | No  | NA | No  |
| NA           | No  | NA | NA  | No  | NA | Yes |
| NA           | No  | NA | NA  | No  | NA | Yes |
| NA           | No  | NA | NA  | No  | NA | No  |
| NA           | No  | NA | NA  | No  | NA | No  |
| NA           | No  | NA | NA  | No  | NA | No  |
| NA           | No  | NA | NA  | Yes | NA | Yes |
| NA           | No  | NA | NA  | No  | NA | No  |
| NA           | No  | NA | NA  | No  | NA | No  |
| NA           | No  | NA | NA  | Yes | NA | No  |
| NA           | No  | NA | NA  | No  | NA | No  |
| NA           | No  | NA | NA  | No  | NA | No  |
| NA           | No  | NA | NA  | Yes | NA | Yes |
| NA           | No  | NA | NA  | No  | NA | Yes |
| Due to COVID | No  | NA | NA  | No  | NA | Yes |
| NA           | No  | NA | NA  | No  | NA | No  |
| NA           | Yes | No | Yes | No  | NA | No  |
| NA           | Yes | No | No  | Yes | NA | Yes |
| NA           | No  | NA | NA  | No  | NA | Yes |
| Due to COVID | No  | NA | NA  | No  | NA | Yes |
| NA           | No  | NA | NA  | No  | NA | No  |
| NA           | No  | NA | NA  | No  | NA | No  |
| NA           | Yes | No | No  | No  | NA | Yes |
| NA           | No  | NA | NA  | Yes | Y  | Yes |
| NA           | No  | NA | NA  | Yes | NA | Yes |
| NA           | No  | NA | NA  | Yes | NA | Yes |
| NA           | No  | NA | NA  | No  | NA | Yes |
| NA           | No  | NA | NA  | No  | NA | Yes |
| NA           | No  | NA | NA  | No  | NA | No  |
| NA           | No  | NA | NA  | Yes | NA | No  |
| NA           | No  | NA | NA  | No  | NA | No  |
| NA           | Yes | No | No  | No  | NA | No  |
| NA           | No  | NA | NA  | No  | NA | No  |
| NA           | No  | NA | NA  | No  | NA | No  |
| NA           | No  | NA | NA  | No  | NA | No  |
| NA           | No  | NA | NA  | No  | NA | No  |
| NA           | No  | NA | NA  | No  | NA | No  |
| NA           | No  | NA | NA  | No  | NA | No  |
| NA           | No  | NA | NA  | No  | NA | No  |
| NA           | No  | NA | NA  | No  | NA | No  |
| NA           | No  | NA | NA  | No  | NA | No  |
| NA           | Yes | No | No  | No  | NA | Yes |
| NA           | No  | NA | NA  | No  | NA | Yes |
| NA           | No  | NA | NA  | No  | NA | No  |
| NA           | No  | NA | NA  | No  | NA | No  |
| NA           | Yes | No | No  | No  | NA | No  |
| NA           | No  | NA | NA  | No  | NA | Yes |
| NA           | No  | NA | NA  | No  | NA | No  |
| NA           | No  | NA | NA  | No  | NA | No  |
| NA           | Yes | No | No  | No  | NA | No  |
| NA           | No  | NA | NA  | No  | NA | Yes |

|              |     |    |     |     |    |     |
|--------------|-----|----|-----|-----|----|-----|
| NA           | No  | NA | NA  | No  | NA | No  |
| NA           | No  | NA | NA  | No  | NA | Yes |
| NA           | No  | NA | NA  | No  | NA | Yes |
| NA           | No  | NA | NA  | No  | NA | No  |
| NA           | No  | NA | NA  | No  | NA | No  |
| NA           | No  | NA | NA  | No  | NA | No  |
| NA           | No  | NA | NA  | Yes | NA | Yes |
| NA           | No  | NA | NA  | No  | Y  | No  |
| NA           | No  | NA | NA  | No  | NA | Yes |
| NA           | No  | NA | NA  | No  | NA | Yes |
| NA           | No  | NA | NA  | No  | NA | No  |
| NA           | No  | NA | NA  | No  | NA | No  |
| NA           | No  | NA | NA  | No  | NA | No  |
| NA           | No  | NA | NA  | No  | NA | Yes |
| NA           | No  | NA | NA  | No  | NA | No  |
| NA           | No  | NA | NA  | No  | NA | No  |
| NA           | No  | NA | NA  | No  | NA | No  |
| NA           | No  | NA | NA  | No  | NA | No  |
| NA           | No  | NA | NA  | No  | NA | No  |
| NA           | No  | NA | NA  | No  | NA | No  |
| NA           | No  | NA | NA  | No  | NA | No  |
| NA           | No  | NA | NA  | No  | NA | No  |
| NA           | No  | NA | NA  | No  | NA | No  |
| NA           | No  | NA | NA  | No  | NA | Yes |
| NA           | No  | NA | NA  | No  | NA | Yes |
| NA           | No  | NA | NA  | No  | NA | No  |
| NA           | No  | NA | NA  | No  | NA | No  |
| NA           | No  | NA | NA  | No  | NA | No  |
| NA           | No  | NA | NA  | No  | NA | Yes |
| NA           | No  | NA | NA  | No  | NA | No  |
| NA           | No  | NA | NA  | No  | NA | No  |
| NA           | No  | NA | NA  | No  | NA | No  |
| Due to COVID | No  | NA | NA  | No  | NA | No  |
| NA           | No  | NA | NA  | No  | NA | No  |
| NA           | Yes | No | No  | Yes | NA | Yes |
| NA           | No  | NA | NA  | No  | NA | No  |
| NA           | No  | NA | NA  | No  | NA | No  |
| NA           | No  | NA | NA  | Yes | NA | Yes |
| NA           | No  | NA | NA  | No  | NA | No  |
| NA           | No  | NA | NA  | No  | NA | Yes |
| NA           | No  | NA | NA  | No  | NA | No  |
| NA           | No  | NA | NA  | No  | NA | No  |
| Due to COVID | Yes | No | Yes | Yes | NA | No  |
| NA           | No  | NA | NA  | No  | Y  | No  |
| NA           | No  | NA | NA  | No  | NA | No  |
| NA           | No  | NA | NA  | Yes | NA | Yes |
| NA           | No  | NA | NA  | No  | NA | No  |
| NA           | No  | NA | NA  | No  | NA | No  |
| NA           | No  | NA | NA  | No  | NA | No  |
| Due to COVID | Yes | No | No  | Yes | NA | No  |
| NA           | No  | NA | NA  | No  | Y  | No  |
| NA           | No  | NA | NA  | Yes | NA | No  |
| NA           | No  | NA | NA  | No  | NA | No  |

|              |     |     |     |     |    |     |
|--------------|-----|-----|-----|-----|----|-----|
| NA           | No  | NA  | NA  | No  | NA | No  |
| NA           | No  | NA  | NA  | No  | NA | No  |
| NA           | No  | NA  | NA  | No  | NA | No  |
| NA           | No  | NA  | NA  | Yes | NA | Yes |
| NA           | No  | NA  | NA  | No  | NA | Yes |
| NA           | No  | NA  | NA  | No  | NA | No  |
| NA           | No  | NA  | NA  | No  | NA | No  |
| NA           | No  | NA  | NA  | Yes | NA | Yes |
| NA           | No  | NA  | NA  | No  | NA | No  |
| NA           | No  | NA  | NA  | No  | NA | No  |
| NA           | No  | NA  | NA  | Yes | NA | Yes |
| NA           | No  | NA  | NA  | No  | NA | No  |
| Due to COVID | No  | NA  | NA  | No  | NA | Yes |
| NA           | Yes | No  | No  | No  | NA | No  |
| NA           | No  | NA  | NA  | No  | NA | No  |
| Due to COVID | Yes | Yes | Yes | No  | NA | Yes |
| NA           | No  | NA  | NA  | No  | NA | Yes |
| NA           | No  | NA  | NA  | No  | NA | No  |
| NA           | No  | NA  | NA  | No  | NA | No  |
| NA           | No  | NA  | NA  | No  | NA | Yes |
| NA           | No  | NA  | NA  | No  | NA | No  |
| NA           | No  | NA  | NA  | No  | NA | No  |
| NA           | No  | NA  | NA  | Yes | NA | Yes |
| NA           | No  | NA  | NA  | No  | NA | No  |
| NA           | Yes | No  | No  | Yes | NA | No  |
| Due to COVID | Yes | Yes | Yes | Yes | NA | Yes |
| NA           | No  | NA  | NA  | No  | Y  | No  |
| NA           | No  | NA  | NA  | Yes | NA | Yes |
| NA           | No  | NA  | NA  | No  | NA | No  |
| NA           | No  | NA  | NA  | No  | NA | Yes |
| Due to COVID | No  | NA  | NA  | No  | NA | Yes |
| NA           | No  | NA  | NA  | No  | NA | No  |
| NA           | No  | NA  | NA  | No  | NA | No  |
| NA           | No  | NA  | NA  | No  | NA | No  |
| NA           | Yes | NA  | Yes | Yes | NA | Yes |
| NA           | No  | NA  | NA  | No  | NA | No  |
| NA           | No  | NA  | NA  | No  | NA | No  |
| NA           | No  | NA  | NA  | No  | NA | Yes |
| NA           | No  | NA  | NA  | No  | NA | No  |
| NA           | No  | NA  | NA  | No  | NA | No  |
| NA           | No  | NA  | NA  | No  | NA | No  |
| NA           | No  | NA  | NA  | No  | NA | Yes |
| NA           | No  | NA  | NA  | Yes | NA | No  |
| NA           | No  | NA  | NA  | No  | NA | No  |
| NA           | No  | NA  | NA  | No  | NA | No  |

|              |     |    |    |     |    |     |
|--------------|-----|----|----|-----|----|-----|
| NA           | No  | NA | NA | No  | NA | Yes |
| NA           | No  | NA | NA | No  | NA | No  |
| NA           | No  | NA | NA | No  | NA | No  |
| NA           | No  | NA | NA | No  | NA | Yes |
| NA           | No  | NA | NA | No  | NA | No  |
| NA           | No  | NA | NA | No  | NA | No  |
| NA           | No  | NA | NA | No  | NA | No  |
| NA           | No  | NA | NA | No  | NA | No  |
| NA           | Yes | No | No | Yes | NA | No  |
| NA           | No  | NA | NA | No  | NA | No  |
| NA           | No  | NA | NA | No  | NA | No  |
| NA           | No  | NA | NA | No  | NA | No  |
| NA           | No  | NA | NA | No  | NA | No  |
| NA           | No  | NA | NA | Yes | NA | No  |
| NA           | No  | NA | NA | No  | NA | No  |
| NA           | No  | NA | NA | No  | NA | No  |
| NA           | No  | NA | NA | No  | NA | Yes |
| NA           | No  | NA | NA | No  | NA | No  |
| NA           | No  | NA | NA | Yes | NA | Yes |
| NA           | No  | NA | NA | No  | NA | No  |
| NA           | No  | NA | NA | No  | NA | Yes |
| NA           | No  | NA | NA | No  | NA | No  |
| NA           | No  | NA | NA | No  | NA | No  |
| NA           | No  | NA | NA | No  | NA | No  |
| NA           | No  | NA | NA | No  | NA | No  |
| NA           | No  | NA | NA | No  | NA | No  |
| NA           | No  | NA | NA | No  | NA | No  |
| Due to COVID | Yes | No | No | No  | NA | Yes |
| NA           | No  | NA | NA | No  | Y  | Yes |
| NA           | No  | NA | NA | No  | NA | No  |
| NA           | No  | NA | NA | No  | NA | No  |
| NA           | No  | NA | NA | No  | NA | No  |
| NA           | No  | NA | NA | No  | NA | No  |
| NA           | No  | NA | NA | No  | NA | Yes |
| NA           | No  | NA | NA | No  | NA | No  |
| NA           | No  | NA | NA | No  | NA | No  |
| NA           | No  | NA | NA | No  | NA | No  |
| NA           | No  | NA | NA | Yes | NA | Yes |
| NA           | No  | NA | NA | No  | NA | No  |
| NA           | No  | NA | NA | No  | NA | Yes |
| NA           | No  | NA | NA | Yes | NA | No  |
| NA           | No  | NA | NA | No  | NA | No  |
| NA           | No  | NA | NA | No  | NA | Yes |
| NA           | Yes | No | No | No  | NA | Yes |
| NA           | No  | NA | NA | No  | NA | No  |
| NA           | No  | NA | NA | No  | NA | Yes |
| NA           | No  | NA | NA | No  | NA | No  |

|              |     |    |     |     |    |     |
|--------------|-----|----|-----|-----|----|-----|
| NA           | No  | NA | NA  | Yes | NA | Yes |
| NA           | No  | NA | NA  | No  | NA | Yes |
| NA           | No  | NA | NA  | No  | NA | No  |
| NA           | No  | NA | NA  | Yes | NA | Yes |
| NA           | No  | NA | NA  | No  | NA | No  |
| NA           | No  | NA | NA  | No  | NA | No  |
| NA           | No  | NA | NA  | No  | NA | No  |
| NA           | No  | NA | NA  | No  | NA | Yes |
| NA           | No  | NA | NA  | Yes | NA | No  |
| NA           | No  | NA | NA  | Yes | NA | Yes |
| NA           | Yes | No | No  | Yes | NA | No  |
| NA           | No  | NA | NA  | No  | NA | Yes |
| NA           | No  | NA | NA  | No  | NA | No  |
| NA           | No  | NA | NA  | No  | NA | Yes |
| NA           | No  | NA | NA  | No  | NA | No  |
| NA           | No  | NA | NA  | No  | NA | No  |
| NA           | Yes | No | No  | Yes | NA | Yes |
| NA           | No  | NA | NA  | No  | NA | No  |
| NA           | No  | NA | NA  | No  | NA | No  |
| NA           | No  | NA | NA  | No  | NA | Yes |
| NA           | No  | NA | NA  | No  | NA | No  |
| NA           | No  | NA | NA  | Yes | NA | Yes |
| NA           | No  | NA | NA  | No  | NA | No  |
| NA           | No  | NA | NA  | No  | NA | Yes |
| NA           | No  | NA | NA  | No  | NA | No  |
| Due to COVID | No  | NA | NA  | No  | NA | Yes |
| NA           | No  | NA | NA  | No  | NA | No  |
| NA           | No  | NA | NA  | No  | NA | No  |
| NA           | No  | NA | NA  | No  | NA | No  |
| NA           | No  | NA | NA  | No  | NA | No  |
| NA           | No  | NA | NA  | No  | NA | No  |
| NA           | No  | NA | NA  | No  | NA | Yes |
| NA           | No  | NA | NA  | No  | NA | No  |
| NA           | No  | NA | NA  | No  | NA | No  |
| NA           | No  | NA | NA  | No  | NA | No  |
| NA           | No  | NA | NA  | No  | NA | No  |
| Previous Con | No  | NA | NA  | No  | NA | Yes |
| NA           | No  | NA | NA  | No  | NA | Yes |
| NA           | No  | NA | NA  | No  | NA | No  |
| Previous Con | No  | NA | NA  | No  | NA | No  |
| NA           | Yes | No | Yes | Yes | NA | Yes |
| NA           | No  | NA | NA  | No  | Y  | No  |
| NA           | No  | NA | NA  | No  | NA | No  |
| NA           | No  | NA | NA  | No  | NA | No  |
| NA           | No  | NA | NA  | No  | NA | No  |

|              |     |    |     |     |    |     |
|--------------|-----|----|-----|-----|----|-----|
| NA           | No  | NA | NA  | No  | NA | No  |
| NA           | Yes | No | No  | No  | NA | No  |
| NA           | No  | NA | NA  | Yes | NA | Yes |
| NA           | No  | NA | NA  | No  | NA | Yes |
| NA           | No  | NA | NA  | No  | NA | No  |
| NA           | No  | NA | NA  | No  | NA | No  |
| NA           | No  | NA | NA  | No  | NA | No  |
| Due to COVID | No  | NA | NA  | Yes | NA | No  |
| NA           | No  | NA | NA  | No  | NA | No  |
| NA           | No  | NA | NA  | No  | NA | No  |
| NA           | No  | NA | NA  | No  | NA | No  |
| NA           | No  | NA | NA  | No  | NA | Yes |
| NA           | No  | NA | NA  | No  | NA | No  |
| NA           | No  | NA | NA  | Yes | NA | No  |
| NA           | No  | NA | NA  | Yes | Y  | Yes |
| NA           | Yes | No | No  | No  | Y  | No  |
| NA           | No  | NA | NA  | No  | NA | No  |
| NA           | No  | NA | NA  | Yes | NA | Yes |
| NA           | No  | NA | NA  | No  | NA | Yes |
| NA           | Yes | No | Yes | Yes | NA | Yes |
| NA           | Yes | No | Yes | Yes | NA | Yes |
| NA           | No  | NA | NA  | No  | Y  | Yes |
| NA           | No  | NA | NA  | No  | NA | No  |
| NA           | No  | NA | NA  | No  | NA | No  |
| NA           | No  | NA | NA  | Yes | NA | No  |
| NA           | No  | NA | NA  | No  | NA | No  |
| Due to COVID | No  | NA | NA  | Yes | NA | Yes |
| NA           | No  | NA | NA  | No  | Y  | No  |
| NA           | No  | NA | NA  | No  | NA | No  |
| Due to COVID | No  | NA | NA  | No  | NA | Yes |
| Due to COVID | Yes | No | Yes | No  | NA | No  |
| NA           | No  | NA | NA  | No  | Y  | No  |
| NA           | No  | NA | NA  | No  | NA | No  |
| NA           | No  | NA | NA  | No  | NA | No  |
| NA           | No  | NA | NA  | No  | NA | No  |
| NA           | No  | NA | NA  | No  | NA | Yes |
| Due to COVID | Yes | No | Yes | Yes | NA | No  |
| NA           | No  | NA | NA  | No  | NA | No  |
| NA           | No  | NA | NA  | Yes | NA | Yes |
| NA           | No  | NA | NA  | No  | NA | Yes |
| Due to COVID | No  | NA | NA  | No  | NA | No  |
| NA           | No  | NA | NA  | No  | NA | No  |
| NA           | No  | NA | NA  | No  | NA | No  |
| NA           | No  | NA | NA  | No  | NA | Yes |
| NA           | No  | NA | NA  | No  | NA | Yes |
| Previous Con | No  | NA | NA  | No  | NA | Yes |

|    |     |    |     |     |    |     |
|----|-----|----|-----|-----|----|-----|
| NA | No  | NA | NA  | No  | NA | Yes |
| NA | No  | NA | NA  | No  | NA | No  |
| NA | No  | NA | NA  | No  | NA | No  |
| NA | No  | NA | NA  | No  | NA | No  |
| NA | Yes | No | Yes | Yes | NA | No  |
| NA | No  | NA | NA  | No  | Y  | No  |
| NA | No  | NA | NA  | No  | NA | No  |
| NA | No  | NA | NA  | No  | NA | No  |
| NA | No  | NA | NA  | No  | NA | No  |
| NA | Yes | No | No  | No  | NA | No  |
| NA | Yes | No | Yes | Yes | NA | Yes |
| NA | No  | NA | NA  | No  | NA | Yes |
| NA | No  | NA | NA  | No  | NA | No  |
| NA | No  | NA | NA  | No  | NA | No  |
| NA | No  | NA | NA  | No  | NA | No  |
| NA | No  | NA | NA  | No  | NA | No  |
| NA | No  | NA | NA  | No  | NA | No  |
| NA | No  | NA | NA  | No  | NA | No  |
| NA | No  | NA | NA  | No  | NA | No  |
| NA | No  | NA | NA  | No  | NA | No  |
| NA | No  | NA | NA  | No  | NA | No  |
| NA | No  | NA | NA  | No  | NA | No  |
| NA | No  | NA | NA  | No  | NA | Yes |
| NA | No  | NA | NA  | No  | NA | Yes |
| NA | No  | NA | NA  | No  | NA | No  |
| NA | No  | NA | NA  | Yes | NA | Yes |
| NA | No  | NA | NA  | No  | NA | No  |
| NA | Yes | No | Yes | Yes | NA | Yes |
| NA | Yes | No | No  | No  | NA | Yes |
| NA | No  | NA | NA  | No  | NA | No  |
| NA | No  | NA | NA  | No  | NA | Yes |
| NA | No  | NA | NA  | No  | NA | Yes |
| NA | No  | NA | NA  | No  | NA | No  |
| NA | No  | NA | NA  | No  | NA | No  |
| NA | No  | NA | NA  | No  | NA | No  |
| NA | No  | NA | NA  | No  | NA | No  |
| NA | No  | NA | NA  | No  | NA | No  |
| NA | No  | NA | NA  | No  | NA | No  |
| NA | No  | NA | NA  | No  | NA | No  |
| NA | No  | NA | NA  | No  | NA | No  |
| NA | No  | NA | NA  | No  | NA | No  |
| NA | No  | NA | NA  | Yes | NA | Yes |



|              |     |    |     |     |    |     |
|--------------|-----|----|-----|-----|----|-----|
| NA           | No  | NA | NA  | No  | NA | No  |
| NA           | No  | NA | NA  | No  | NA | No  |
| NA           | Yes | No | Yes | Yes | NA | Yes |
| NA           | No  | NA | NA  | No  | Y  | No  |
| NA           | No  | NA | NA  | Yes | NA | Yes |
| NA           | No  | NA | NA  | No  | NA | No  |
| NA           | No  | NA | NA  | No  | NA | No  |
| NA           | No  | NA | NA  | No  | NA | No  |
| NA           | No  | NA | NA  | No  | NA | No  |
| NA           | No  | NA | NA  | No  | NA | No  |
| NA           | No  | NA | NA  | No  | NA | Yes |
| NA           | No  | NA | NA  | Yes | NA | Yes |
| NA           | No  | NA | NA  | Yes | NA | Yes |
| NA           | No  | NA | NA  | No  | NA | No  |
| NA           | No  | NA | NA  | No  | NA | Yes |
| NA           | Yes | No | No  | No  | NA | No  |
| NA           | No  | NA | NA  | No  | NA | No  |
| NA           | No  | NA | NA  | No  | NA | No  |
| NA           | No  | NA | NA  | No  | NA | No  |
| NA           | No  | NA | NA  | No  | NA | No  |
| NA           | No  | NA | NA  | No  | NA | No  |
| NA           | No  | NA | NA  | No  | NA | No  |
| NA           | No  | NA | NA  | No  | NA | No  |
| NA           | Yes | No | No  | No  | NA | No  |
| NA           | No  | NA | NA  | No  | NA | Yes |
| NA           | No  | NA | NA  | No  | NA | Yes |
| NA           | No  | NA | NA  | No  | NA | No  |
| NA           | Yes | No | Yes | No  | NA | Yes |
| NA           | No  | NA | NA  | No  | Y  | No  |
| NA           | No  | NA | NA  | No  | NA | No  |
| Previous Con | No  | NA | NA  | No  | NA | No  |
| Previous Con | No  | NA | NA  | No  | NA | No  |
| NA           | No  | NA | NA  | No  | NA | Yes |
| NA           | No  | NA | NA  | No  | NA | Yes |
| NA           | No  | NA | NA  | No  | NA | No  |
| NA           | No  | NA | NA  | No  | NA | No  |
| NA           | No  | NA | NA  | No  | NA | No  |
| NA           | No  | NA | NA  | No  | NA | No  |
| NA           | No  | NA | NA  | No  | NA | No  |
| NA           | No  | NA | NA  | No  | NA | No  |
| NA           | No  | NA | NA  | No  | NA | No  |
| Previous Con | No  | NA | NA  | No  | NA | Yes |
| NA           | No  | NA | NA  | No  | NA | No  |
| NA           | No  | NA | NA  | No  | NA | Yes |
| NA           | No  | NA | NA  | Yes | NA | Yes |
| NA           | No  | NA | NA  | No  | NA | No  |

|              |     |     |     |     |    |     |
|--------------|-----|-----|-----|-----|----|-----|
| NA           | No  | NA  | NA  | No  | NA | No  |
| NA           | No  | NA  | NA  | No  | NA | No  |
| NA           | No  | NA  | NA  | No  | NA | No  |
| NA           | No  | NA  | NA  | No  | NA | No  |
| NA           | No  | NA  | NA  | No  | NA | No  |
| NA           | No  | NA  | NA  | No  | NA | No  |
| NA           | No  | NA  | NA  | No  | NA | No  |
| NA           | No  | NA  | NA  | No  | NA | No  |
| NA           | No  | NA  | NA  | No  | NA | Yes |
| NA           | No  | NA  | NA  | No  | NA | No  |
| NA           | No  | NA  | NA  | No  | NA | No  |
| NA           | No  | NA  | NA  | No  | NA | No  |
| NA           | No  | NA  | NA  | No  | NA | No  |
| NA           | No  | NA  | NA  | No  | NA | No  |
| NA           | No  | NA  | NA  | No  | NA | Yes |
| NA           | No  | NA  | NA  | No  | NA | No  |
| NA           | Yes | No  | Yes | No  | NA | Yes |
| Due to COVID | Yes | Yes | Yes | No  | NA | Yes |
| NA           | No  | NA  | NA  | No  | Y  | No  |
| NA           | No  | NA  | NA  | Yes | NA | Yes |
| NA           | No  | NA  | NA  | No  | NA | No  |
| NA           | No  | NA  | NA  | No  | NA | Yes |
| NA           | No  | NA  | NA  | No  | NA | Yes |
| NA           | No  | NA  | NA  | No  | NA | Yes |
| NA           | No  | NA  | NA  | No  | Y  | No  |
| NA           | No  | NA  | NA  | No  | NA | Yes |
| NA           | No  | NA  | NA  | No  | NA | Yes |
| NA           | No  | NA  | NA  | No  | NA | Yes |
| NA           | No  | NA  | NA  | No  | NA | Yes |
| NA           | No  | NA  | NA  | No  | NA | No  |
| NA           | No  | NA  | NA  | Yes | NA | No  |
| NA           | No  | NA  | NA  | No  | NA | Yes |
| NA           | No  | NA  | NA  | No  | NA | No  |
| NA           | No  | NA  | NA  | No  | NA | No  |
| NA           | No  | NA  | NA  | No  | NA | No  |
| NA           | No  | NA  | NA  | No  | NA | No  |
| NA           | Yes | No  | No  | No  | NA | No  |
| NA           | No  | NA  | NA  | No  | NA | No  |
| NA           | No  | NA  | NA  | No  | NA | No  |
| NA           | Yes | No  | No  | No  | NA | No  |
| NA           | No  | NA  | NA  | No  | NA | No  |
| NA           | Yes | No  | Yes | Yes | NA | Yes |
| Due to COVID | Yes | No  | Yes | No  | Y  | Yes |
| NA           | No  | NA  | NA  | No  | Y  | Yes |
| NA           | No  | NA  | NA  | No  | NA | Yes |
| NA           | No  | NA  | NA  | No  | NA | No  |
| NA           | No  | NA  | NA  | Yes | NA | No  |
| NA           | No  | NA  | NA  | No  | NA | No  |

|              |     |    |     |     |    |     |
|--------------|-----|----|-----|-----|----|-----|
| NA           | No  | NA | NA  | Yes | NA | No  |
| NA           | No  | NA | NA  | No  | NA | No  |
| NA           | No  | NA | NA  | No  | NA | Yes |
| NA           | No  | NA | NA  | No  | NA | No  |
| NA           | No  | NA | NA  | No  | NA | Yes |
| NA           | No  | NA | NA  | No  | NA | No  |
| NA           | No  | NA | NA  | No  | NA | No  |
| NA           | No  | NA | NA  | No  | NA | No  |
| NA           | No  | NA | NA  | No  | NA | Yes |
| NA           | No  | NA | NA  | No  | NA | No  |
| NA           | No  | NA | NA  | No  | NA | No  |
| NA           | No  | NA | NA  | No  | NA | No  |
| NA           | No  | NA | NA  | Yes | NA | No  |
| NA           | No  | NA | NA  | No  | NA | Yes |
| NA           | Yes | No | No  | No  | NA | Yes |
| NA           | No  | NA | NA  | No  | NA | No  |
| NA           | No  | NA | NA  | No  | NA | No  |
| NA           | No  | NA | NA  | No  | NA | No  |
| NA           | No  | NA | NA  | No  | NA | No  |
| NA           | No  | NA | NA  | No  | NA | No  |
| NA           | No  | NA | NA  | Yes | NA | Yes |
| NA           | No  | NA | NA  | No  | NA | No  |
| NA           | No  | NA | NA  | Yes | NA | Yes |
| NA           | No  | NA | NA  | No  | NA | Yes |
| NA           | Yes | No | NA  | Yes | NA | Yes |
| NA           | No  | NA | NA  | Yes | Y  | Yes |
| Previous Con | No  | NA | NA  | No  | NA | No  |
| NA           | No  | NA | NA  | No  | NA | No  |
| NA           | No  | NA | NA  | No  | NA | No  |
| NA           | Yes | No | No  | No  | NA | No  |
| NA           | No  | NA | NA  | No  | NA | No  |
| NA           | No  | NA | NA  | No  | NA | No  |
| NA           | No  | NA | NA  | No  | NA | Yes |
| Due to COVID | Yes | No | Yes | Yes | NA | Yes |
| NA           | No  | NA | NA  | No  | Y  | Yes |
| NA           | No  | NA | NA  | No  | NA | Yes |
| NA           | No  | NA | NA  | No  | Y  | No  |
| NA           | Yes | No | No  | No  | NA | No  |
| NA           | No  | NA | NA  | No  | NA | No  |
| NA           | No  | NA | NA  | Yes | NA | Yes |
| NA           | No  | NA | NA  | No  | NA | Yes |
| Due to COVID | No  | NA | NA  | Yes | NA | Yes |
| NA           | No  | NA | NA  | No  | NA | No  |
| NA           | No  | NA | NA  | No  | NA | No  |
| NA           | No  | NA | NA  | No  | NA | No  |
| NA           | Yes | No | No  | No  | NA | No  |
| NA           | No  | NA | NA  | Yes | NA | No  |

|              |     |     |     |     |    |     |
|--------------|-----|-----|-----|-----|----|-----|
| NA           | No  | NA  | NA  | No  | NA | Yes |
| NA           | No  | NA  | NA  | No  | NA | No  |
| NA           | No  | NA  | NA  | No  | NA | No  |
| NA           | No  | NA  | NA  | No  | NA | Yes |
| NA           | No  | NA  | NA  | No  | NA | No  |
| NA           | No  | NA  | NA  | No  | NA | No  |
| NA           | No  | NA  | NA  | No  | NA | Yes |
| NA           | No  | NA  | NA  | No  | NA | Yes |
| NA           | No  | NA  | NA  | Yes | NA | No  |
| NA           | Yes | No  | No  | Yes | NA | No  |
| Due to COVID | Yes | Yes | Yes | No  | NA | Yes |
| Due to COVID | Yes | No  | No  | Yes | NA | Yes |
| NA           | Yes | No  | Yes | No  | Y  | Yes |
| NA           | No  | NA  | NA  | No  | NA | Yes |
| NA           | No  | NA  | NA  | No  | NA | No  |
| NA           | No  | NA  | NA  | No  | NA | Yes |
| NA           | No  | NA  | NA  | No  | NA | No  |
| NA           | No  | NA  | NA  | No  | NA | No  |
| NA           | No  | NA  | NA  | No  | NA | Yes |
| NA           | No  | NA  | NA  | No  | NA | No  |
| NA           | No  | NA  | NA  | No  | NA | No  |
| NA           | No  | NA  | NA  | No  | NA | No  |
| NA           | No  | NA  | NA  | No  | NA | Yes |
| NA           | No  | NA  | NA  | No  | NA | Yes |
| NA           | No  | NA  | NA  | No  | NA | No  |
| Due to COVID | Yes | No  | Yes | Yes | NA | Yes |
| NA           | No  | NA  | NA  | No  | Y  | Yes |
| NA           | Yes | No  | No  | Yes | NA | No  |
| Due to COVID | No  | NA  | NA  | No  | NA | Yes |
| NA           | No  | NA  | NA  | No  | NA | Yes |
| NA           | No  | NA  | NA  | No  | NA | Yes |
| NA           | No  | NA  | NA  | Yes | NA | Yes |
| NA           | No  | NA  | NA  | Yes | NA | Yes |
| NA           | No  | NA  | NA  | No  | NA | Yes |
| NA           | No  | NA  | NA  | Yes | NA | No  |
| NA           | No  | NA  | NA  | Yes | NA | No  |
| NA           | No  | NA  | NA  | No  | NA | No  |
| NA           | No  | NA  | NA  | No  | NA | No  |
| NA           | No  | NA  | NA  | Yes | NA | No  |
| NA           | No  | NA  | NA  | No  | NA | No  |
| NA           | No  | NA  | NA  | No  | NA | No  |
| NA           | No  | NA  | NA  | No  | NA | No  |
| NA           | No  | NA  | NA  | No  | NA | No  |
| NA           | No  | NA  | NA  | No  | NA | No  |
| NA           | No  | NA  | NA  | No  | NA | Yes |
| NA           | No  | NA  | NA  | Yes | NA | Yes |

|              |     |    |    |     |    |     |
|--------------|-----|----|----|-----|----|-----|
| NA           | No  | NA | NA | No  | NA | No  |
| NA           | No  | NA | NA | No  | NA | Yes |
| NA           | No  | NA | NA | Yes | NA | No  |
| NA           | No  | NA | NA | No  | NA | No  |
| NA           | No  | NA | NA | No  | NA | Yes |
| NA           | No  | NA | NA | No  | NA | Yes |
| NA           | No  | NA | NA | No  | NA | No  |
| NA           | No  | NA | NA | No  | NA | Yes |
| NA           | No  | NA | NA | Yes | NA | No  |
| NA           | No  | NA | NA | No  | NA | Yes |
| NA           | No  | NA | NA | No  | NA | No  |
| NA           | No  | NA | NA | Yes | NA | Yes |
| NA           | No  | NA | NA | No  | NA | No  |
| Previous Con | No  | NA | NA | No  | NA | No  |
| NA           | No  | NA | NA | No  | NA | No  |
| NA           | No  | NA | NA | No  | NA | No  |
| Previous Con | No  | NA | NA | No  | NA | No  |
| Previous Con | No  | NA | NA | No  | NA | No  |
| NA           | No  | NA | NA | Yes | NA | No  |
| NA           | No  | NA | NA | No  | NA | No  |
| Due to COVID | Yes | No | No | No  | NA | Yes |
| Due to COVID | No  | NA | NA | No  | NA | No  |
| NA           | No  | NA | NA | No  | NA | Yes |
| NA           | No  | NA | NA | Yes | NA | Yes |
| NA           | No  | NA | NA | No  | NA | Yes |
| NA           | No  | NA | NA | No  | NA | No  |
| NA           | No  | NA | NA | No  | NA | No  |
| NA           | No  | NA | NA | No  | NA | No  |
| NA           | No  | NA | NA | No  | NA | No  |
| NA           | No  | NA | NA | No  | NA | No  |
| NA           | No  | NA | NA | No  | NA | Yes |
| NA           | No  | NA | NA | Yes | NA | Yes |
| NA           | No  | NA | NA | No  | NA | No  |
| NA           | No  | NA | NA | No  | NA | No  |
| NA           | No  | NA | NA | No  | NA | No  |
| NA           | No  | NA | NA | Yes | NA | Yes |
| NA           | Yes | No | No | No  | NA | No  |
| NA           | No  | NA | NA | No  | NA | No  |
| NA           | No  | NA | NA | Yes | NA | No  |
| NA           | No  | NA | NA | Yes | NA | Yes |
| NA           | No  | NA | NA | No  | NA | No  |
| NA           | No  | NA | NA | No  | NA | Yes |
| NA           | No  | NA | NA | No  | NA | No  |
| NA           | Yes | No | No | No  | NA | Yes |
| NA           | No  | NA | NA | No  | NA | No  |
| NA           | No  | NA | NA | No  | NA | No  |
| NA           | No  | NA | NA | No  | NA | No  |

|              |     |     |     |    |    |     |
|--------------|-----|-----|-----|----|----|-----|
| NA           | No  | NA  | NA  | No | NA | Yes |
| NA           | No  | NA  | NA  | No | NA | No  |
| NA           | No  | NA  | NA  | No | NA | No  |
| NA           | No  | NA  | NA  | No | NA | No  |
| Due to COVID | Yes | No  | Yes | No | NA | Yes |
| NA           | Yes | No  | No  | No | Y  | Yes |
| Due to COVID | Yes | Yes | No  | No | NA | No  |

|    |    |    |    |          |    |     |
|----|----|----|----|----------|----|-----|
| NA | No | No | No | Complete | NA | 0.7 |
| NA | No | No | No | Complete |    | 0.7 |
| NA | No | No | No | Complete |    | 0.8 |
| NA | No | No | No | Complete | NA | 0.4 |
| NA | No | No | No | Complete |    | 0.6 |
| NA | No | No | No | Complete |    | 1.7 |
| NA | No | No | No | Complete |    | 1.4 |
| NA | No | No | No | Complete |    | 0.9 |
| NA | No | No | No | Complete |    | 0.8 |
| NA | No | No | No | Complete | NA | 0.7 |
| NA | No | No | No | Complete |    | 0.5 |
| NA | No | No | No | Complete |    | 0.6 |
| NA | No | No | No | Complete |    | 0.8 |
| NA | No | No | No | Complete |    | 1   |
| NA | No | No | No | Complete |    | 0.6 |
| NA | No | No | No | Complete |    | 0.6 |
| NA | No | No | No | Complete |    | 0.6 |
| NA | No | No | No | Complete |    | 1.3 |
| NA | No | No | No | Complete |    | 0.8 |
| NA | No | No | No | Complete |    | 1.5 |
| NA | No | No | No | Complete |    | 1   |
| y  | No | No | No | Complete |    | 2.1 |
| NA | No | No | No | Complete |    | 1   |
| NA | No | No | No | Complete |    | 1.3 |
| NA | No | No | No | Complete |    | 1.1 |
| NA | No | No | No | Complete |    | 0.6 |
| y  | No | No | No | Complete |    | 1.2 |
| NA | No | No | No | Complete |    | 0.6 |
| NA | No | No | No | Complete |    | 0.8 |
| NA | No | No | No | Complete |    | 0.6 |
| NA | No | No | No | Complete |    | 0.9 |
| NA | No | No | No | Complete |    | 0.5 |
| NA | No | No | No | Complete |    | 1   |
| NA | No | No | No | Complete |    | 0.8 |
| NA | No | No | No | Complete |    | 1.1 |
| NA | No | No | No | Complete |    | 0.5 |
| NA | No | No | No | Complete |    | 0.7 |
| y  | No | No | No | Complete |    | 0.6 |
| NA | No | No | No | Complete |    | 0.7 |
| NA | No | No | No | Complete |    | 1.3 |
| NA | No | No | No | Complete |    | 1.7 |
| NA | No | No | No | Complete |    | 1   |
| NA | No | No | No | Complete |    | 0.8 |
| NA | No | No | No | Complete |    | 0.8 |
| NA | No | No | No | Complete |    | 1   |
| NA | No | No | No | Complete |    | 0.6 |

|    |     |    |    |          |     |     |     |
|----|-----|----|----|----------|-----|-----|-----|
| NA | No  | No | No | Complete |     | 0.8 | 0.8 |
| NA | No  | No | No | Complete |     | 0.6 | 0.8 |
| NA | No  | No | No | Complete | NA  |     | 0.7 |
| NA | No  | No | No | Complete |     | 1.1 | 1   |
| y  | No  | No | No | Complete |     | 0.7 | 0.9 |
| NA | No  | No | No | Complete |     | 9.1 | 8.2 |
| NA | No  | No | No | Complete |     | 0.6 | 0.8 |
| NA | No  | No | No | Complete |     | 0.7 | 1   |
| NA | Yes | No | No | Complete |     | 0.9 | 1   |
| NA | No  | No | No | Complete |     | 1.1 | 1   |
| NA | No  | No | No | Complete |     | 0.6 | 0.7 |
| NA | No  | No | No | Complete |     | 0.8 | 2   |
| NA | No  | No | No | Complete |     | 0.8 | 0.6 |
| NA | No  | No | No | Complete | NA  |     | 0.9 |
| y  | No  | No | No | Complete |     | 1.5 | 1.5 |
| NA | No  | No | No | Complete |     | 0.9 | 1   |
| y  | No  | No | No | Complete |     | 0.6 | 0.6 |
| NA | No  | No | No | Complete |     | 2.2 | 1.7 |
| NA | No  | No | No | Complete |     | 0.5 | 0.5 |
| NA | No  | No | No | Complete |     | 0.5 | 0.6 |
| NA | No  | No | No | Complete |     | 0.4 | 0.5 |
| y  | No  | No | No | Complete |     | 0.9 | 1   |
| NA | No  | No | No | Complete |     | 0.9 | 1   |
| NA | No  | No | No | Complete |     | 1   | 1.1 |
| NA | No  | No | No | Complete |     | 0.8 | 0.8 |
| NA | No  | No | No | Complete |     | 1.1 | 1.4 |
| NA | No  | NA | No | Complete |     | 3.2 | 3.8 |
| NA | No  | No | No | Complete |     | 2.3 | 2.6 |
| NA | No  | No | No | Complete |     | 0.7 | 0.7 |
| y  | No  | No | No | Complete |     | 2.8 | 2.8 |
| NA | No  | No | No | Complete |     | 0.9 | 1.1 |
| NA | No  | No | No | Complete |     | 1.8 | 2.2 |
| NA | No  | No | No | Complete |     | 1   | 1.1 |
| NA | No  | No | No | Complete |     | 1   | 1   |
| NA | No  | No | No | Complete |     | 2.8 | 3   |
| NA | No  | No | No | Complete |     | 2.2 | 2.1 |
| NA | No  | No | No | Complete |     | 1.4 | 1.4 |
| NA | No  | No | No | Complete | TNP |     | 0.9 |
| NA | No  | No | No | Complete |     | 0.8 | 0.9 |
| NA | No  | No | No | Complete |     | 0.7 | 0.9 |
| NA | No  | No | No | Complete |     | 0.6 | 0.6 |
| NA | No  | No | No | Complete |     | 1.4 | 1.6 |
| NA | No  | No | No | Complete |     | 2.4 | 2.6 |
| NA | No  | No | No | Complete |     | 1.1 | 1.3 |
| NA | No  | No | No | Complete |     | 0.9 | 0.9 |



|    |    |    |    |          |    |     |     |
|----|----|----|----|----------|----|-----|-----|
| NA | No | No | No | Complete |    | 1   | 1.1 |
| NA | No | No | No | Complete |    | 0.6 | 0.9 |
| NA | No | No | No | Complete |    | 1.1 | 0.9 |
| NA | No | No | No | Complete |    | 1.4 | 1.4 |
| NA | No | No | No | Complete |    | 0.8 | 1.1 |
| NA | No | No | No | Complete | NA |     | 0.9 |
| NA | No | No | No | Complete | NA | NA  |     |
| y  | No | No | No | Complete |    | 1.3 | 1.5 |
| NA | No | No | No | Complete |    | 0.6 | 0.7 |
| NA | No | No | No | Complete |    | 0.9 | 1.2 |
| NA | No | No | No | Complete |    | 1.7 | 2.1 |
| NA | No | No | No | Complete |    | 1   | 1.1 |
| NA | No | No | No | Complete |    | 0.8 | 0.9 |
| NA | No | No | No | Complete |    | 2   | 1.9 |
| NA | No | No | No | Complete |    | 1.2 | 1.4 |
| NA | No | No | No | Complete |    | 1.1 | 1.3 |
| NA | No | No | No | Complete |    | 0.6 | 0.7 |
| NA | No | No | No | Complete |    | 0.8 | 0.8 |
| NA | No | No | No | Complete |    | 2.2 | 2.3 |
| NA | No | No | No | Complete |    | 0.4 | 0.4 |
| NA | No | No | No | Complete |    | 0.5 | 0.4 |
| NA | No | No | No | Complete |    | 1.3 | 1.6 |
| NA | No | No | No | Complete |    | 1.6 | 1.7 |
| NA | No | No | No | Complete |    | 1   | 1   |
| NA | No | No | No | Complete |    | 1.3 | 1.2 |
| NA | No | No | No | Complete |    | 1.3 | 1.3 |
| NA | No | No | No | Complete |    | 2   | 1.2 |
| y  | No | No | No | Complete |    | 1.5 | 1.5 |
| NA | No | No | No | Complete |    | 0.8 | 0.8 |
| NA | No | No | No | Complete |    | 1.1 | 1.3 |
| NA | No | No | No | Complete |    | 0.8 | 0.9 |
| NA | No | No | No | Complete |    | 1   | 1   |
| NA | No | No | No | Complete |    | 1.9 | 1.9 |
| NA | No | No | No | Complete |    | 1.2 | 1.2 |
| NA | No | No | No | Complete |    | 1.5 | 1.6 |
| NA | No | No | No | Complete |    | 1.4 | 1.4 |
| NA | No | No | No | Complete |    | 1.4 | 1   |
| NA | No | No | No | Complete | NA |     | 1.2 |
| NA | No | No | No | Complete |    | 0.5 | 0.5 |
| NA | No | No | No | Complete |    | 0.8 | 0.9 |
| NA | No | No | No | Complete |    | 0.7 | 0.8 |
| NA | No | No | No | Complete |    | 1   | 0.8 |
| NA | No | No | No | Complete |    | 1   | 1.1 |
| NA | No | No | No | Complete | NA |     | 0.5 |
| NA | No | No | No | Complete |    | 0.9 | 1   |

|    |     |    |    |          |    |      |      |
|----|-----|----|----|----------|----|------|------|
| NA | No  | No | No | Complete |    | 0.7  | 0.7  |
| NA | No  | No | No | Complete |    | 1.1  | 1.2  |
| NA | No  | No | No | Complete |    | 1    | 1.1  |
| NA | No  | No | No | Complete |    | 1.2  | 1.3  |
| NA | No  | No | No | Complete |    | 0.5  | 0.6  |
| NA | No  | No | No | Complete |    | 0.8  | 0.7  |
| NA | No  | No | No | Complete | NA | NA   |      |
| NA | No  | No | No | Complete |    | 1.5  | 1.9  |
| NA | No  | No | No | Complete |    | 0.8  | 1.1  |
| NA | No  | No | No | Complete |    | 0.9  | 1    |
| NA | No  | No | No | Complete |    | 1.2  | 1.4  |
| NA | No  | No | No | Complete |    | 0.5  | 0.6  |
| NA | No  | No | No | Complete |    | 0.5  | 0.5  |
| NA | No  | No | No | Complete |    | 1.2  | 1.1  |
| NA | No  | No | No | Complete |    | 0.7  | 0.8  |
| y  | No  | No | No | Complete |    | 0.6  | 0.6  |
| NA | No  | No | No | Complete |    | 1    | 1.2  |
| NA | No  | No | No | Complete |    | 8.9  | 14.6 |
| NA | No  | No | No | Complete |    | 0.7  | 0.8  |
| y  | No  | No | No | Complete |    | 1.8  | 1.9  |
| NA | No  | No | No | Complete |    | 0.4  | 0.6  |
| NA | No  | No | No | Complete |    | 0.7  | 0.9  |
| NA | No  | No | No | Complete |    | 6.1  | 5.7  |
| NA | No  | No | No | Complete |    | 2.9  | 3.4  |
| NA | No  | No | No | Complete |    | 0.9  | 1    |
| NA | No  | No | No | Complete |    | 0.6  | 0.7  |
| NA | No  | No | No | Complete |    | 2.8  | 2.8  |
| NA | No  | No | No | Complete |    | 0.7  | 0.7  |
| NA | No  | No | No | Complete |    | 1.7  | 4.5  |
| NA | No  | No | No | Complete | NA | NA   |      |
| NA | No  | No | No | Complete |    | 0.7  | 1    |
| NA | No  | No | No | Complete |    | 0.8  | 1    |
| NA | No  | No | No | Complete |    | 1    | 0.8  |
| NA | No  | No | No | Complete |    | 1.8  | 1.7  |
| y  | No  | No | No | Complete |    | 0.8  | 0.8  |
| NA | No  | No | No | Complete |    | 0.7  | 1.1  |
| NA | No  | No | No | Complete |    | 0.7  | 0.9  |
| y  | No  | No | No | Complete |    | 0.9  | 1    |
| NA | No  | No | No | Complete | NA |      | 0.6  |
| NA | No  | No | No | Complete | NA |      | 0.6  |
| NA | No  | No | No | Complete |    | 15.2 | 15.1 |
| NA | No  | No | No | Complete |    | 0.7  | 0.8  |
| NA | No  | No | No | Complete |    | 0.7  | 0.8  |
| NA | Yes | No | No | Complete |    | 0.7  | 1    |
| NA | No  | No | No | Complete |    | 0.8  | 1.2  |

|    |     |    |    |          |    |     |     |
|----|-----|----|----|----------|----|-----|-----|
| NA | No  | No | No | Complete |    | 4.6 | 3.8 |
| NA | No  | No | No | Complete |    | 4.6 | 3.8 |
| NA | No  | No | No | Complete | NA |     | 0.7 |
| NA | No  | No | No | Complete | NA | NA  |     |
| NA | No  | No | No | Complete | NA |     | 0.9 |
| y  | No  | No | No | Complete |    | 2.5 | 2.5 |
| NA | No  | No | No | Complete |    | 1.2 | 1.2 |
| NA | No  | No | No | Complete |    | 0.8 | 1   |
| NA | No  | No | No | Complete |    | 1.3 | 1.5 |
| y  | No  | No | No | Complete |    | 0.7 | 0.7 |
| NA | No  | No | No | Complete |    | 2.4 | 2.4 |
| NA | No  | No | No | Complete |    | 1.3 | 1.2 |
| NA | No  | No | No | Complete |    | 1.7 | 1.5 |
| NA | No  | No | No | Complete |    | 1   | 1.1 |
| NA | No  | No | No | Complete |    | 1.4 | 1.4 |
| NA | No  | No | No | Complete |    | 0.7 | 0.7 |
| NA | No  | No | No | Complete |    | 0.6 | 0.8 |
| NA | No  | No | No | Complete |    | 0.8 | 1.2 |
| NA | No  | No | No | Complete | NA |     | 0.9 |
| y  | No  | No | No | Complete |    | 0.7 | 0.6 |
| NA | No  | No | No | Complete |    | 0.8 | 0.9 |
| NA | No  | No | No | Complete |    | 0.7 | 0.8 |
| y  | No  | No | No | Complete |    | 1.8 | 1.1 |
| NA | No  | No | No | Complete | NA |     | 0.7 |
| NA | No  | No | No | Complete |    | 1.3 | 1.5 |
| y  | No  | No | No | Complete |    | 1.3 | 1.3 |
| y  | No  | No | No | Complete |    | 1.2 | 1.4 |
| NA | No  | No | No | Complete |    | 0.7 | 0.8 |
| NA | No  | No | No | Complete |    | 0.7 | 0.7 |
| NA | No  | No | No | Complete |    | 0.8 | 1.1 |
| NA | No  | No | No | Complete |    | 1   | 1.5 |
| NA | No  | No | No | Complete |    | 0.5 | 0.6 |
| NA | No  | No | No | Complete |    | 1.1 | 1.4 |
| NA | No  | No | No | Complete |    | 0.9 | 1   |
| NA | No  | No | No | Complete |    | 0.6 | 0.8 |
| NA | No  | No | No | Complete |    | 1.6 | 1.6 |
| NA | No  | No | No | Complete |    | 0.8 | 1   |
| NA | No  | No | No | Complete |    | 0.6 | 0.6 |
| NA | No  | No | No | Complete |    | 1.4 | 1.5 |
| NA | No  | No | No | Complete |    | 1.1 | 1   |
| NA | No  | No | No | Complete | NA |     | 0.9 |
| NA | Yes | No | No | Complete |    | 0.6 | 0.7 |
| NA | No  | No | No | Complete |    | 2   | 1.8 |
| NA | No  | No | No | Complete |    | 0.7 | 0.8 |
| NA | No  | No | No | Complete |    | 1.2 | 1.4 |

|    |     |    |    |          |    |     |      |
|----|-----|----|----|----------|----|-----|------|
| NA | No  | No | No | Complete | NA |     | 2.2  |
| NA | No  | No | No | Complete | NA |     | 1    |
| NA | No  | No | No | Complete | NA |     | 0.5  |
| NA | No  | No | No | Complete |    | 3.1 | 2.9  |
| NA | No  | No | No | Complete |    | 1.3 | 2.1  |
| NA | No  | No | No | Complete |    | 1   | 1.1  |
| NA | Yes | No | No | Complete |    | 0.9 | 1    |
| y  | No  | No | No | Complete |    | 0.9 | 0.9  |
| NA | No  | No | No | Complete |    | 1.4 | 1    |
| NA | No  | No | No | Complete |    | 0.8 | 2.8  |
| NA | No  | No | No | Complete | NA | NA  |      |
| NA | No  | No | No | Complete |    | 0.7 | 1    |
| NA | No  | No | No | Complete |    | 0.5 | 0.7  |
| NA | No  | No | No | Complete |    | 0.6 | 0.6  |
| NA | NA  | No | No | Complete |    | 1.3 | 1.5  |
| NA | No  | No | No | Complete |    | 1   | 1    |
| NA | No  | No | No | Complete |    | 0.8 | 0.9  |
| NA | No  | No | No | Complete |    | 0.9 | 1    |
| y  | No  | No | No | Complete |    | 1   | 1.3  |
| NA | No  | No | No | Complete |    | 0.8 | 0.7  |
| NA | No  | No | No | Complete |    | 0.8 | 1    |
| NA | No  | No | No | Complete |    | 5.7 | 5.7  |
| NA | No  | No | No | Complete |    | 6.8 | 7.8  |
| NA | No  | No | No | Complete |    | 0.5 | 0.8  |
| NA | No  | No | No | Complete |    | 0.6 | 1.5  |
| NA | No  | No | No | Complete |    | 0.8 | 0.7  |
| NA | No  | No | No | Complete |    | 8   | 11.3 |
| NA | No  | No | No | Complete |    | 2.7 | 2.6  |
| NA | No  | No | No | Complete |    | 0.6 | 0.7  |
| NA | No  | No | No | Complete | NA |     | 0.6  |
| NA | No  | No | No | Complete |    | 1.4 | 1.6  |
| NA | No  | No | No | Complete |    | 0.9 | 1    |
| NA | No  | No | No | Complete |    | 2.7 | 2.6  |
| y  | No  | No | No | Complete |    | 0.6 | 0.6  |
| NA | No  | No | No | Complete |    | 0.9 | 1.3  |
| NA | No  | No | No | Complete |    | 1.3 | 1.3  |
| NA | No  | No | No | Complete |    | 0.8 | 0.8  |
| NA | No  | No | No | Complete |    | 2.3 | 1.6  |
| NA | No  | No | No | Complete |    | 1.6 | 1.6  |
| NA | No  | No | No | Complete |    | 0.9 | 0.9  |
| NA | No  | No | No | Complete |    | 0.9 | 0.9  |
| NA | No  | No | No | Complete |    | 0.6 | 0.6  |
| NA | No  | No | No | Complete |    | 0.8 | 1    |
| y  | No  | No | No | Complete |    | 0.7 | 0.9  |
| NA | No  | No | No | Complete |    | 0.8 | 0.9  |

|    |     |    |    |          |     |     |
|----|-----|----|----|----------|-----|-----|
| NA | No  | No | No | Complete | NA  | 0.7 |
| NA | No  | No | No | Complete | 1.1 | 1.1 |
| y  | No  | No | No | Complete | 0.7 | 0.7 |
| NA | No  | No | No | Complete | 0.7 | 0.9 |
| NA | No  | No | No | Complete | 0.6 | 0.7 |
| NA | No  | No | No | Complete | 0.6 | 0.6 |
| NA | No  | No | No | Complete | 0.7 | 0.7 |
| NA | No  | No | No | Complete | 0.7 | 0.9 |
| NA | No  | No | No | Complete | 0.7 | 1   |
| NA | No  | No | No | Complete | 0.4 | 0.4 |
| NA | No  | No | No | Complete | 0.3 | 0.5 |
| NA | No  | No | No | Complete | 0.9 | 1.3 |
| NA | No  | No | No | Complete | 0.7 | 0.9 |
| NA | No  | No | No | Complete | 0.8 | 0.8 |
| NA | No  | No | No | Complete | 0.5 | 0.5 |
| NA | No  | No | No | Complete | 1.9 | 1.2 |
| NA | No  | No | No | Complete | 2.4 | 2   |
| NA | No  | No | No | Complete | 0.6 | 0.6 |
| NA | No  | No | No | Complete | 0.8 | 1   |
| NA | No  | No | No | Complete | 0.7 | 1.2 |
| NA | No  | No | No | Complete | 0.9 | 1.1 |
| NA | No  | No | No | Complete | 0.7 | 0.8 |
| y  | No  | No | No | Complete | 0.6 | 0.8 |
| NA | No  | No | No | Complete | 0.4 | 0.5 |
| NA | No  | No | No | Complete | 0.5 | 0.7 |
| NA | No  | No | No | Complete | 1.4 | 1.1 |
| NA | No  | No | No | Complete | 0.8 | 0.9 |
| NA | No  | No | No | Complete | 0.9 | 0.9 |
| NA | No  | No | No | Complete | 0.6 | 0.7 |
| NA | No  | No | No | Complete | 1   | 1.1 |
| NA | No  | No | No | Complete | 0.7 | 0.8 |
| NA | No  | No | No | Complete | 3.2 | 3   |
| NA | No  | No | No | Complete | 1.5 | 1.5 |
| NA | No  | No | No | Complete | 0.8 | 0.8 |
| NA | No  | No | No | Complete | 3.1 | 3.2 |
| NA | No  | No | No | Complete | 1.6 | 2.7 |
| NA | No  | No | No | Complete | 0.8 | 0.9 |
| NA | Yes | No | No | Complete | 0.7 | 0.8 |
| NA | No  | No | No | Complete | 0.8 | 1   |
| NA | No  | No | No | Complete | 0.8 | 1.1 |
| NA | No  | No | No | Complete | 1.3 | 1.8 |
| y  | No  | No | No | Complete | 0.8 | 0.9 |
| NA | No  | No | No | Complete | 0.5 | 0.6 |
| NA | No  | No | No | Complete | NA  | NA  |
| NA | No  | No | No | Complete | 3.2 | 3   |

|    |     |     |     |          |     |     |
|----|-----|-----|-----|----------|-----|-----|
| NA | No  | No  | No  | Complete | 0.8 | 0.9 |
| y  | No  | No  | No  | Complete | 1.3 | 1.1 |
| NA | No  | No  | No  | Complete | 0.6 | 0.5 |
| NA | No  | No  | No  | Complete | 3.2 | 3.2 |
| NA | No  | No  | No  | Complete | 0.7 | 0.8 |
| NA | No  | No  | No  | Complete | 0.9 | 0.9 |
| NA | No  | No  | No  | Complete | 0.4 | 0.4 |
| NA | No  | No  | No  | Complete | 1.1 | 1.2 |
| NA | No  | No  | No  | Complete | 0.8 | 0.8 |
| NA | No  | No  | No  | Complete | 1   | 1.7 |
| NA | No  | No  | No  | Complete | 1.2 | 1.4 |
| NA | No  | No  | No  | Complete | 2   | 2.6 |
| y  | No  | No  | No  | Complete | 1.4 | 1.4 |
| NA | No  | No  | No  | Complete | 0.5 | 0.7 |
| NA | No  | No  | No  | Complete | 0.7 | 0.8 |
| NA | No  | No  | No  | Complete | 1.9 | 2   |
| NA | No  | No  | No  | Complete | 1.3 | 1.9 |
| NA | No  | No  | No  | Complete | 1.4 | 1.6 |
| NA | No  | No  | No  | Complete | 0.2 | 0.3 |
| NA | No  | No  | No  | Complete | 1.1 | 1.2 |
| NA | No  | No  | No  | Complete | 1   | 1.1 |
| NA | No  | No  | No  | Complete | 4.3 | 6.5 |
| NA | No  | No  | No  | Complete | 1.9 | 2   |
| NA | No  | No  | No  | Complete | 1   | 1.5 |
| NA | No  | No  | No  | Complete | 1.2 | 1.3 |
| y  | No  | No  | No  | Complete | 0.9 | 0.8 |
| NA | No  | No  | No  | Complete | 0.8 | 1   |
| y  | No  | No  | No  | Complete | 0.9 | 1   |
| NA | Yes | Yes | Yes | Complete | 2.1 | 2   |
| NA | No  | No  | No  | Complete | 0.7 | 0.5 |
| NA | No  | No  | No  | Complete | 0.5 | 0.7 |
| NA | No  | No  | No  | Complete | 0.8 | 0.8 |
| NA | No  | No  | No  | Complete | 0.6 | 0.8 |
| NA | No  | No  | No  | Complete | 0.5 | 0.5 |
| NA | No  | No  | No  | Complete | 4.2 | 3.8 |
| y  | No  | No  | No  | Complete | 0.8 | 1   |
| NA | No  | No  | No  | Complete | 4.3 | 4.3 |
| NA | No  | No  | No  | Complete | 8   | 7.8 |
| NA | No  | No  | No  | Complete | 2.9 | 1.4 |
| NA | No  | No  | No  | Complete | 1   | 1.2 |
| NA | No  | No  | No  | Complete | 1.1 | 1.3 |
| NA | No  | No  | No  | Complete | 2.3 | 3.6 |
| NA | No  | No  | No  | Complete | 1   | 1   |
| NA | No  | No  | No  | Complete | 1.3 | 1.3 |
| NA | No  | No  | No  | Complete | 0.9 | 1   |

|    |     |    |     |          |    |     |      |
|----|-----|----|-----|----------|----|-----|------|
| NA | No  | No | No  | Complete |    | 1.3 | 1.4  |
| NA | No  | No | No  | Complete |    | 0.9 | 1.2  |
| NA | No  | No | No  | Complete |    | 1.2 | 1.3  |
| NA | No  | No | No  | Complete |    | 1.7 | 0.4  |
| NA | No  | No | No  | Complete |    | 3   | 3.2  |
| NA | No  | No | No  | Complete |    | 1   | 1.3  |
| NA | No  | No | No  | Complete |    | 1.3 | 1.3  |
| NA | No  | No | No  | Complete |    | 0.8 | 0.8  |
| NA | No  | No | No  | Complete |    | 0.9 | 0.9  |
| NA | No  | No | No  | Complete |    | 2.1 | 2.6  |
| NA | No  | No | No  | Complete |    | 0.8 | 1.3  |
| NA | No  | No | No  | Complete |    | 1   | 1    |
| NA | No  | No | No  | Complete |    | 0.7 | 0.7  |
| NA | No  | No | No  | Complete |    | 0.5 | 0.5  |
| NA | No  | No | No  | Complete |    | 0.7 | 0.7  |
| NA | No  | No | No  | Complete |    | 0.5 | 0.7  |
| NA | No  | No | Yes | Complete |    | 0.4 | 0.6  |
| NA | No  | No | No  | Complete |    | 0.6 | 0.8  |
| NA | No  | No | No  | Complete |    | 0.4 | 0.5  |
| NA | No  | No | No  | Complete |    | 0.6 | 0.7  |
| NA | No  | No | No  | Complete |    | 4.5 | 4.7  |
| NA | No  | No | No  | Complete |    | 5   | 15.2 |
| NA | No  | No | No  | Complete |    | 1   | 1    |
| NA | No  | No | No  | Complete |    | 1.3 | 1.5  |
| NA | No  | No | No  | Complete | NA | NA  |      |
| NA | No  | No | No  | Complete |    | 0.7 | 1    |
| y  | No  | No | No  | Complete |    | 0.7 | 0.8  |
| NA | No  | No | No  | Complete |    | 2.4 | 2.4  |
| NA | No  | No | No  | Complete |    | 1.2 | 1.2  |
| y  | No  | No | No  | Complete |    | 0.7 | 0.8  |
| NA | No  | No | No  | Complete |    | 0.7 | 0.7  |
| NA | No  | No | No  | Complete |    | 0.7 | 0.8  |
| y  | No  | No | No  | Complete |    | 0.9 | 0.8  |
| NA | Yes | No | No  | Complete |    | 0.9 | 1    |
| NA | No  | No | No  | Complete |    | 1.2 | 1.4  |
| NA | No  | No | No  | Complete |    | 1.4 | 1.9  |
| NA | No  | No | No  | Complete |    | 5.3 | 4    |
| NA | No  | No | No  | Complete |    | 6.7 | 5.7  |
| NA | No  | No | No  | Complete |    | 0.8 | 0.8  |
| NA | No  | No | No  | Complete |    | 0.7 | 0.9  |
| NA | No  | No | No  | Complete |    | 1   | 1.2  |
| NA | No  | No | No  | Complete | NA |     | 1    |
| NA | No  | No | No  | Complete | NA |     | 0.9  |
| NA | No  | No | No  | Complete |    | 0.9 | 1.2  |
| NA | No  | No | No  | Complete |    | 2.6 | 2.4  |

|    |    |    |    |          |    |      |      |
|----|----|----|----|----------|----|------|------|
| NA | No | No | No | Complete |    | 2.3  | 1.8  |
| NA | No | No | No | Complete |    | 0.5  | 0.6  |
| NA | No | No | No | Complete |    | 0.7  | 1    |
| NA | No | No | No | Complete |    | 0.7  | 0.8  |
| NA | No | No | No | Complete |    | 1.8  | 1.7  |
| NA | No | No | No | Complete |    | 1    | 1.1  |
| NA | No | No | No | Complete |    | 0.7  | 0.9  |
| NA | No | No | No | Complete |    | 0.4  | 0.5  |
| NA | No | No | No | Complete |    | 0.9  | 0.9  |
| NA | No | No | No | Complete |    | 0.7  | 0.6  |
| NA | No | No | No | Complete |    | 6.5  | 8.6  |
| NA | No | No | No | Complete |    | 0.9  | 1.7  |
| NA | No | No | No | Complete | NA |      | 1.3  |
| NA | No | No | No | Complete |    | 7.3  | 6.5  |
| NA | No | No | No | Complete |    | 0.8  | 0.8  |
| NA | No | No | No | Complete |    | 1.3  | 1.4  |
| NA | No | No | No | Complete |    | 1.2  | 1.3  |
| NA | No | No | No | Complete |    | 2.6  | 2.5  |
| NA | No | No | No | Complete |    | 0.7  | 0.7  |
| NA | No | No | No | Complete |    | 1.8  | 2    |
| NA | No | No | No | Complete |    | 1.2  | 1.5  |
| NA | No | No | No | Complete |    | 0.7  | 0.8  |
| NA | No | No | No | Complete |    | 0.9  | 1    |
| NA | No | No | No | Complete |    | 3    | 3.3  |
| NA | No | No | No | Complete |    | 3.9  | 4.1  |
| y  | No | No | No | Complete |    | 0.9  | 1.2  |
| y  | No | No | No | Complete |    | 0.9  | 1.4  |
| NA | No | No | No | Complete |    | 1    | 1.2  |
| NA | No | No | No | Complete |    | 1.8  | 1.5  |
| NA | No | No | No | Complete | NA |      | 1.1  |
| NA | No | No | No | Complete |    | 2.4  | 2.8  |
| y  | No | No | No | Complete |    | 1.4  | 1.5  |
| NA | No | No | No | Complete |    | 0.6  | 0.8  |
| NA | No | No | No | Complete |    | 0.6  | 0.8  |
| NA | No | No | No | Complete |    | 0.8  | 0.8  |
| y  | No | No | No | Complete |    | 0.7  | 0.8  |
| NA | No | No | No | Complete |    | 2.9  | 0.9  |
| NA | No | No | No | Complete |    | 1.3  | 0.6  |
| NA | No | No | No | Complete |    | 1    | 0.9  |
| NA | No | No | No | Complete | NA |      | 1.6  |
| NA | No | No | No | Complete |    | 0.6  | 0.6  |
| NA | No | No | NA | Complete |    | 18.9 | 27.5 |
| NA | No | No | No | Complete |    | 0.5  | 0.5  |
| NA | No | No | No | Complete |    | 0.9  | 1    |
| y  | No | No | No | Complete |    | 1.6  | 1.5  |



|    |    |    |    |            |    |     |     |
|----|----|----|----|------------|----|-----|-----|
| NA | No | NA | NA | Complete   |    | 0.5 | 0.6 |
| NA | No | No | No | Complete   |    | 0.8 | 0.8 |
| NA | No | No | NA | Complete   |    | 0.7 | 0.9 |
| y  | No | No | No | Complete   |    | 1.1 | 1.1 |
| NA | No | No | No | Complete   |    | 0.5 | 0.6 |
| NA | No | No | No | Complete   |    | 0.8 | 1   |
| NA | No | No | No | Complete   |    | 0.9 | 1   |
| NA | No | No | No | Complete   |    | 1.9 | 2.2 |
| NA | No | No | No | Complete   | NA |     | 0.6 |
| NA | NA | NA | NA | Incomplete | NA |     | 0.7 |
| NA | No | No | No | Complete   |    | 6   | 4.9 |
| NA | NA | No | No | Complete   |    | 1.6 | 2   |
| NA | No | No | No | Complete   |    | 1.1 | 1.4 |
| NA | No | No | No | Complete   |    | 0.8 | 0.8 |
| NA | No | No | No | Complete   |    | 8.8 | 8.8 |
| NA | No | No | No | Complete   |    | 0.7 | 0.8 |
| NA | No | No | No | Complete   |    | 2   | 1.8 |
| y  | No | No | No | Complete   |    | 0.8 | 1.3 |
| NA | No | No | No | Complete   |    | 3.8 | 4   |
| NA | No | No | No | Complete   |    | 0.9 | 1.1 |
| NA | No | No | No | Complete   |    | 0.5 | 0.6 |
| NA | No | No | No | Complete   |    | 1   | 1.2 |
| NA | No | No | No | Complete   |    | 0.7 | 0.8 |
| NA | No | No | No | Complete   |    | 0.5 | 0.6 |
| NA | No | No | No | Complete   |    | 0.9 | 1.4 |
| NA | No | No | No | Complete   |    | 0.5 | 0.6 |
| NA | No | No | No | Complete   |    | 2.4 | 1.9 |
| NA | No | No | No | Complete   |    | 1.6 | 1.4 |
| NA | No | No | No | Complete   |    | 1.1 | 1.3 |
| NA | No | No | No | Complete   |    | 1   | 1.2 |
| NA | No | No | No | Complete   |    | 3.4 | 3.7 |
| NA | No | No | No | Complete   |    | 2.3 | 2.3 |
| NA | No | No | No | Complete   |    | 1   | 1   |
| NA | No | No | No | Complete   |    | 0.4 | 0.5 |
| NA | No | No | No | Complete   |    | 0.5 | 0.5 |
| NA | No | No | No | Complete   |    | 1.4 | 1.5 |
| y  | No | No | No | Complete   |    | 1   | 1   |
| NA | No | No | No | Complete   |    | 0.8 | 0.9 |
| NA | No | No | No | Complete   |    | 0.6 | 0.7 |
| NA | No | No | No | Complete   |    | 1.2 | 1.2 |
| NA | No | No | No | Complete   |    | 2   | 2   |
| NA | No | No | No | Complete   |    | 1.3 | 1.7 |
| NA | No | No | No | Complete   |    | 1.4 | 1.3 |
| NA | No | No | No | Complete   |    | 0.4 | 0.5 |
| NA | No | No | No | Complete   |    | 1.8 | 2.1 |

|    |    |    |     |          |    |     |     |
|----|----|----|-----|----------|----|-----|-----|
| y  | No | No | No  | Complete |    | 1.1 | 1.1 |
| NA | No | No | No  | Complete |    | 0.4 | 0.4 |
| y  | No | No | No  | Complete |    | 4.3 | 3.8 |
| NA | No | No | No  | Complete |    | 0.9 | 1   |
| NA | No | No | No  | Complete |    | 1   | 1   |
| NA | No | No | No  | Complete |    | 1   | 1.2 |
| NA | No | No | No  | Complete |    | 0.9 | 1.1 |
| NA | No | No | No  | Complete |    | 0.8 | 0.9 |
| y  | No | No | No  | Complete |    | 5.4 | 6   |
| NA | No | No | No  | Complete |    | 0.8 | 0.6 |
| NA | No | No | No  | Complete |    | 1.8 | 2   |
| NA | No | No | No  | Complete |    | 1   | 1.1 |
| NA | No | No | No  | Complete |    | 0.9 | 0.8 |
| NA | No | No | No  | Complete |    | 6.4 | 8.9 |
| NA | No | No | No  | Complete |    | 1.2 | 1.6 |
| NA | No | No | Yes | Complete |    | 1   | 1.2 |
| NA | No | No | No  | Complete |    | 0.9 | 0.9 |
| NA | No | No | No  | Complete | NA |     | 1.4 |
| y  | No | No | No  | Complete |    | 0.8 | 0.8 |
| NA | No | No | No  | Complete |    | 1.5 | 1.5 |
| NA | No | No | No  | Complete |    | 0.4 | 0.6 |
| NA | No | No | No  | Complete |    | 1   | 1.1 |
| y  | No | No | No  | Complete |    | 1   | 1   |
| NA | No | No | No  | Complete | NA |     | 1.4 |
| NA | No | No | No  | Complete | NA |     | 1   |
| NA | No | No | No  | Complete |    | 0.7 | 0.8 |
| NA | No | No | No  | Complete |    | 0.8 | 1.1 |
| y  | No | No | No  | Complete |    | 0.7 | 0.8 |
| NA | No | No | No  | Complete |    | 0.5 | 0.7 |
| NA | No | No | No  | Complete |    | 0.7 | 0.8 |
| y  | No | No | No  | Complete |    | 1.1 | 1.3 |
| NA | No | No | No  | Complete |    | 1   | 1.1 |
| y  | No | No | No  | Complete |    | 0.6 | 0.7 |
| NA | No | No | No  | Complete |    | 0.6 | 0.6 |
| NA | No | No | No  | Complete |    | 2.3 | 2.9 |
| NA | No | No | No  | Complete |    | 0.7 | 0.7 |
| NA | No | No | No  | Complete |    | 0.9 | 0.8 |
| NA | No | No | No  | Complete |    | 1   | 1   |
| NA | No | No | No  | Complete |    | 1.3 | 1.4 |
| NA | No | No | No  | Complete |    | 1.8 | 1.8 |
| NA | No | No | No  | Complete |    | 0.6 | 0.8 |
| NA | No | No | No  | Complete |    | 1.4 | 1.6 |
| NA | No | No | No  | Complete |    | 0.6 | 0.9 |
| NA | No | No | No  | Complete |    | 0.9 | 1.2 |
| NA | No | No | No  | Complete |    | 0.9 | 1.2 |

|    |     |    |    |          |    |     |     |
|----|-----|----|----|----------|----|-----|-----|
| NA | No  | No | No | Complete |    | 0.9 | 1   |
| NA | No  | No | No | Complete |    | 1.2 | 1.5 |
| NA | No  | No | No | Complete |    | 0.7 | 0.8 |
| y  | No  | No | No | Complete |    | 2.1 | 2.2 |
| NA | No  | No | No | Complete |    | 1.8 | 1.8 |
| NA | No  | No | No | Complete |    | 0.9 | 1   |
| NA | No  | No | No | Complete |    | 0.6 | 0.6 |
| NA | No  | No | No | Complete |    | 1.2 | 1.8 |
| NA | No  | No | No | Complete |    | 0.9 | 1   |
| NA | No  | No | No | Complete | NA |     | 0.7 |
| NA | No  | No | No | Complete |    | 0.5 | 0.3 |
| NA | No  | No | No | Complete |    | 0.4 | 0.4 |
| NA | No  | No | No | Complete | NA |     | 0.7 |
| NA | No  | No | No | Complete |    | 0.5 | 0.6 |
| NA | No  | No | No | Complete |    | 0.8 | 0.8 |
| NA | No  | No | No | Complete |    | 0.5 | 0.4 |
| NA | No  | No | No | Complete |    | 2   | 2   |
| y  | No  | No | No | Complete |    | 0.8 | 0.9 |
| NA | No  | No | No | Complete |    | 0.9 | 0.8 |
| NA | No  | No | No | Complete |    | 0.6 | 0.8 |
| NA | No  | No | No | Complete |    | 0.9 | 1.1 |
| NA | No  | No | No | Complete |    | 0.9 | 0.9 |
| NA | No  | No | No | Complete |    | 1   | 1   |
| NA | No  | No | No | Complete |    | 1.1 | 1.1 |
| NA | No  | No | No | Complete |    | 2.6 | 2.7 |
| NA | No  | No | No | Complete |    | 2.7 | 2.8 |
| NA | No  | No | No | Complete |    | 0.6 | 0.7 |
| NA | No  | No | No | Complete |    | 0.8 | 1.6 |
| NA | No  | No | No | Complete |    | 1.2 | 0.7 |
| NA | No  | No | No | Complete |    | 0.8 | 0.8 |
| NA | No  | No | No | Complete |    | 0.5 | 0.6 |
| NA | No  | No | No | Complete |    | 0.8 | 0.8 |
| NA | No  | No | No | Complete |    | 0.9 | 0.9 |
| NA | No  | No | No | Complete |    | 0.7 | 0.8 |
| NA | No  | No | No | Complete |    | 0.8 | 1   |
| NA | No  | No | No | Complete |    | 0.4 | 0.6 |
| NA | Yes | No | No | Complete |    | 0.9 | 0.9 |
| NA | No  | No | No | Complete |    | 0.4 | 0.7 |
| NA | No  | No | No | Complete |    | 0.8 | 0.6 |
| NA | No  | No | No | Complete |    | 0.6 | 0.6 |
| NA | No  | No | No | Complete | NA |     | 0.9 |
| NA | No  | No | No | Complete |    | 0.5 | 0.7 |
| NA | No  | No | NA | Complete |    | 0.7 | 0.6 |
| NA | No  | No | No | Complete |    | 0.4 | 0.4 |
| NA | No  | No | No | Complete |    | 1.1 | 1.3 |

|    |    |    |    |          |     |     |
|----|----|----|----|----------|-----|-----|
| NA | No | No | No | Complete | 1.8 | 1.8 |
| NA | No | No | No | Complete | 0.8 | 0.8 |
| NA | No | No | No | Complete | 0.7 | 0.8 |
| NA | No | No | NA | Complete | 0.6 | 0.7 |
| NA | No | No | No | Complete | 1   | 1   |
| NA | No | No | No | Complete | 0.6 | 1   |
| NA | No | No | No | Complete | 1.1 | 1.3 |
| NA | No | No | No | Complete | 1.8 | 1.9 |
| NA | No | No | No | Complete | 0.8 | 0.8 |
| NA | No | No | No | Complete | 1   | 1.3 |
| NA | No | No | No | Complete | 0.5 | 0.7 |
| y  | No | No | No | Complete | 1   | 1.2 |
| NA | No | No | No | Complete | 0.9 | 1   |
| NA | No | No | No | Complete | 0.7 | 0.8 |
| y  | No | No | No | Complete | 0.9 | 0.8 |
| y  | No | No | No | Complete | 1.1 | 1   |
| NA | No | No | No | Complete | 0.5 | 0.6 |
| NA | No | No | No | Complete | 0.6 | 0.8 |
| NA | No | No | No | Complete | 4.8 | 4.4 |
| NA | No | No | No | Complete | 0.9 | 0.7 |
| NA | No | No | No | Complete | 1   | 1.1 |
| NA | No | No | No | Complete | 0.6 | 0.5 |
| NA | No | No | No | Complete | 0.9 | 0.9 |
| NA | No | No | No | Complete | 1.4 | 1.7 |
| y  | No | No | No | Complete | 1   | 1   |
| NA | No | No | No | Complete | 1.1 | 1.2 |
| NA | No | No | No | Complete | 0.9 | 1.1 |
| NA | No | No | No | Complete | 0.8 | 1   |
| NA | No | No | No | Complete | 0.5 | 0.8 |
| NA | No | No | No | Complete | NA  | 0.6 |
| NA | No | No | No | Complete | 0.7 | 0.6 |
| NA | No | No | No | Complete | 1   | 1.1 |
| NA | No | No | No | Complete | 0.8 | 1.3 |
| NA | No | No | No | Complete | 0.6 | 0.9 |
| NA | No | No | No | Complete | 0.3 | 0.3 |
| y  | No | No | No | Complete | 1.2 | 1.2 |
| NA | No | No | No | Complete | 2.4 | 2.7 |
| NA | No | No | No | Complete | 0.5 | 0.8 |
| NA | No | No | No | Complete | 0.4 | 0.5 |
| NA | No | No | No | Complete | 0.5 | 0.6 |
| NA | No | No | No | Complete | 0.6 | 0.7 |
| NA | No | No | No | Complete | 0.8 | 1.1 |
| NA | No | No | No | Complete | 2   | 2   |
| NA | No | No | No | Complete | 0.6 | 0.7 |
| NA | No | No | No | Complete | 0.6 | 0.5 |

|    |    |    |    |          |      |     |
|----|----|----|----|----------|------|-----|
| NA | No | No | No | Complete | 1.2  | 1.2 |
| NA | No | NA | NA | Complete | 0.8  | 1   |
| NA | No | No | No | Complete | 1.2  | 1.1 |
| NA | No | No | NA | Complete | 1    | 0.9 |
| NA | No | No | No | Complete | 0.9  | 0.7 |
| y  | No | No | NA | Complete | 1.9  | 1.7 |
| NA | No | No | No | Complete | 0.4  | 0.6 |
| NA | No | No | No | Complete | 0.4  | 0.4 |
| NA | No | No | No | Complete | 1.1  | 1.3 |
| NA | No | No | No | Complete | 1.5  | 1.6 |
| NA | No | No | No | Complete | 1    | 1.1 |
| NA | No | No | No | Complete | 0.5  | 0.6 |
| NA | No | No | No | Complete | 0.7  | 1   |
| NA | No | No | No | Complete | 0.6  | 0.6 |
| NA | No | No | No | Complete | 3.2  | 3.5 |
| NA | No | No | No | Complete | 1.2  | 1.4 |
| NA | No | No | No | Complete | 2.4  | 1.4 |
| NA | No | No | No | Complete | 0.6  | 0.6 |
| NA | No | No | No | Complete | 0.7  | 0.9 |
| NA | No | No | No | Complete | 0.7  | 0.7 |
| NA | No | No | No | Complete | 15.7 | 14  |
| NA | No | No | No | Complete | 0.9  | 1   |
| NA | No | No | No | Complete | 1    | 1.1 |
| NA | No | No | No | Complete | 0.6  | 0.7 |
| y  | No | No | No | Complete | 1    | 1   |
| NA | No | No | No | Complete | 1.1  | 1.2 |
| NA | No | No | No | Complete | 0.9  | 1.2 |
| NA | No | No | No | Complete | 0.9  | 1.1 |
| NA | No | No | No | Complete | 1    | 1.1 |
| y  | No | No | No | Complete | 1.2  | 1.4 |
| NA | No | No | No | Complete | 1.2  | 1.5 |
| NA | No | No | No | Complete | 1    | 1.1 |
| NA | No | No | No | Complete | 2.9  | 3.7 |
| NA | No | No | No | Complete | 0.9  | 1.1 |
| NA | No | No | No | Complete | 2.2  | 2.2 |
| NA | No | No | No | Complete | 0.8  | 0.9 |
| NA | No | No | No | Complete | 0.8  | 0.9 |
| NA | No | No | No | Complete | 0.8  | 1   |
| NA | No | No | No | Complete | 1.5  | 1.4 |
| y  | No | No | No | Complete | 0.9  | 0.9 |
| NA | No | No | No | Complete | 0.4  | 0.6 |
| NA | No | No | No | Complete | 0.7  | 0.9 |
| NA | No | No | No | Complete | 1    | 1.1 |
| NA | No | No | No | Complete | 0.8  | 1   |
| NA | No | No | No | Complete | 0.8  | 0.8 |

|    |    |    |    |          |     |     |
|----|----|----|----|----------|-----|-----|
| NA | No | No | No | Complete | 0.5 | 0.6 |
| NA | No | No | No | Complete | 2.6 | 2.8 |
| NA | No | No | No | Complete | 3.4 | 3.5 |
| NA | No | No | No | Complete | 3.5 | 3.6 |
| NA | No | No | No | Complete | 0.6 | 0.5 |
| NA | No | No | No | Complete | 1.2 | 1.2 |
| NA | No | No | No | Complete | 0.8 | 0.8 |
| NA | No | No | No | Complete | 4.8 | 4.6 |
| y  | No | No | No | Complete | 0.8 | 1   |
| NA | No | No | No | Complete | 3.8 | 6   |
| NA | No | No | No | Complete | 1.6 | 1.5 |
| NA | No | No | No | Complete | 1   | 1.2 |
| NA | No | No | No | Complete | 0.4 | 0.4 |
| NA | No | No | No | Complete | 0.7 | 0.7 |
| NA | No | No | No | Complete | 1.6 | 1.8 |
| NA | No | No | No | Complete | 6.1 | 5.7 |
| NA | No | No | No | Complete | 0.9 | 1   |
| NA | No | No | No | Complete | 0.7 | 0.8 |
| NA | No | No | No | Complete | 0.9 | 1   |
| NA | No | No | No | Complete | 1   | 1   |
| NA | No | No | No | Complete | 0.8 | 0.8 |
| NA | No | No | No | Complete | 0.5 | 0.5 |
| NA | No | No | No | Complete | NA  | 0.8 |
| NA | No | No | No | Complete | 0.7 | 0.7 |
| NA | No | No | No | Complete | 6.4 | 6.4 |
| NA | No | No | No | Complete | 0.7 | 0.7 |
| NA | No | No | No | Complete | 1.6 | 1.7 |
| NA | No | No | No | Complete | 0.6 | 0.7 |
| NA | No | No | No | Complete | 3.8 | 5.2 |
| y  | No | No | No | Complete | 0.5 | 0.6 |
| NA | No | No | No | Complete | 0.6 | 0.9 |
| NA | No | No | No | Complete | 1.6 | 1.5 |
| NA | No | No | No | Complete | 0.8 | 1.1 |
| NA | No | No | No | Complete | 0.7 | 0.9 |
| NA | No | No | No | Complete | 0.6 | 0.8 |
| NA | No | No | No | Complete | 0.7 | 0.7 |
| NA | No | No | No | Complete | 0.7 | 0.8 |
| y  | No | No | No | Complete | 0.6 | 0.6 |
| NA | No | No | No | Complete | 0.7 | 0.6 |
| NA | No | No | No | Complete | 0.5 | 0.6 |
| NA | No | No | No | Complete | 0.5 | 0.7 |
| NA | No | No | No | Complete | 1   | 1.4 |
| NA | No | No | No | Complete | 1   | 1   |
| NA | No | No | No | Complete | 0.5 | 0.7 |
| NA | No | No | No | Complete | 0.9 | 1.1 |

|    |    |    |    |          |     |     |     |
|----|----|----|----|----------|-----|-----|-----|
| NA | No | No | No | Complete |     | 1.1 | 1.2 |
| NA | No | No | No | Complete |     | 2.1 | 2   |
| NA | No | No | No | Complete |     | 2   | 2.2 |
| NA | No | No | No | Complete |     | 0.9 | 1   |
| NA | No | No | No | Complete |     | 0.6 | 0.7 |
| NA | No | No | No | Complete |     | 1.3 | 1.5 |
| NA | No | No | No | Complete |     | 0.8 | 0.7 |
| y  | No | No | No | Complete |     | 0.9 | 0.9 |
| NA | No | No | No | Complete |     | 0.9 | 1   |
| NA | No | No | No | Complete |     | 2.3 | 2   |
| NA | No | No | No | Complete |     | 2.2 | 2.3 |
| NA | No | No | No | Complete |     | 0.7 | 0.8 |
| NA | No | No | No | Complete |     | 2   | 0.6 |
| NA | No | No | No | Complete |     | 0.7 | 0.8 |
| NA | No | No | No | Complete |     | 1.2 | 1.2 |
| NA | No | No | No | Complete |     | 0.8 | 0.8 |
| NA | No | No | No | Complete |     | 1.3 | 1.7 |
| NA | No | No | No | Complete |     | 1.3 | 1   |
| NA | No | No | No | Complete |     | 0.5 | 0.5 |
| NA | No | No | No | Complete |     | 0.8 | 0.8 |
| NA | No | No | No | Complete | NA  |     | 0.6 |
| NA | No | No | No | Complete |     | 0.7 | 0.8 |
| NA | No | No | No | Complete |     | 0.4 | 0.4 |
| NA | No | No | No | Complete |     | 0.8 | 1.6 |
| NA | No | No | No | Complete |     | 1.6 | 1.5 |
| y  | No | No | No | Complete |     | 1   | 1.2 |
| NA | No | No | No | Complete |     | 1   | 1.3 |
| y  | No | No | No | Complete |     | 0.4 | 0.5 |
| NA | No | No | No | Complete |     | 1   | 1.2 |
| y  | No | No | No | Complete |     | 0.6 | 0.8 |
| NA | No | No | No | Complete |     | 1.5 | 1.5 |
| NA | No | No | No | Complete |     | 1   | 1.1 |
| NA | No | No | No | Complete |     | 0.6 | 0.6 |
| NA | No | No | No | Complete |     | 0.6 | 0.6 |
| NA | No | No | No | Complete |     | 0.8 | 1   |
| NA | No | No | No | Complete | TNP |     | 1.1 |
| NA | No | No | No | Complete |     | 0.5 | 0.8 |
| NA | No | No | No | Complete |     | 0.5 | 0.5 |
| NA | No | No | No | Complete |     | 1.3 | 1.4 |
| NA | No | No | No | Complete |     | 0.5 | 0.6 |
| NA | No | No | No | Complete |     | 0.5 | 0.4 |
| NA | No | No | No | Complete |     | 1.6 | 5.5 |
| NA | No | No | No | Complete |     | 0.8 | 1   |
| NA | No | No | No | Complete |     | 1.5 | 1.7 |
| NA | No | No | No | Complete |     | 0.8 | 1   |

|    |    |    |    |          |    |     |     |
|----|----|----|----|----------|----|-----|-----|
| NA | No | No | No | Complete |    | 1.1 | 1   |
| NA | No | No | No | Complete |    | 1   | 0.6 |
| NA | No | No | No | Complete |    | 0.4 | 0.6 |
| NA | No | No | No | Complete |    | 0.6 | 0.7 |
| NA | No | No | No | Complete |    | 0.9 | 0.6 |
| NA | No | No | No | Complete | NA | NA  |     |
| NA | No | No | No | Complete |    | 0.4 | 0.5 |
| NA | No | No | No | Complete |    | 0.7 | 0.9 |
| NA | No | No | No | Complete | NA |     | 0.8 |
| NA | No | No | No | Complete |    | 0.9 | 1.1 |
| NA | No | No | No | Complete |    | 0.8 | 1.1 |
| NA | No | No | No | Complete |    | 0.8 | 0.8 |
| NA | No | No | No | Complete |    | 1.2 | 1.3 |
| NA | No | No | No | Complete |    | 0.6 | 0.6 |
| y  | No | No | No | Complete |    | 2.8 | 2.8 |
| NA | No | No | No | Complete | NA |     | 0.7 |
| NA | No | No | No | Complete |    | 0.8 | 0.8 |
| NA | No | No | No | Complete |    | 0.8 | 0.8 |
| NA | No | No | No | Complete |    | 1   | 0.9 |
| NA | No | No | No | Complete |    | 0.7 | 0.6 |
| NA | No | No | No | Complete |    | 1   | 1.3 |
| NA | No | No | No | Complete |    | 1.3 | 1.5 |
| y  | No | No | No | Complete |    | 0.7 | 0.8 |
| NA | No | No | No | Complete |    | 0.5 | 0.6 |
| NA | No | No | No | Complete |    | 0.9 | 1   |
| NA | No | No | No | Complete |    | 1.1 | 1.1 |
| NA | No | No | No | Complete |    | 3   | 3.3 |
| NA | No | No | No | Complete |    | 1.2 | 1.6 |
| NA | No | No | No | Complete |    | 0.7 | 0.9 |
| NA | No | No | No | Complete | NA |     | 1   |
| NA | No | No | No | Complete |    | 0.3 | 0.4 |
| NA | No | No | No | Complete |    | 0.6 | 0.6 |
| NA | No | No | No | Complete |    | 1.8 | 1.9 |
| NA | No | No | No | Complete |    | 1.1 | 1.5 |
| NA | No | No | No | Complete |    | 0.8 | 0.9 |
| NA | No | No | No | Complete |    | 1   | 1   |
| NA | No | No | No | Complete |    | 0.8 | 1   |
| NA | No | No | No | Complete |    | 1   | 1.2 |
| NA | No | No | No | Complete |    | 0.7 | 0.7 |
| NA | No | No | No | Complete |    | 0.6 | 0.7 |
| y  | No | No | No | Complete |    | 0.6 | 0.7 |
| y  | No | No | No | Complete |    | 1.5 | 1.8 |
| NA | No | No | No | Complete |    | 3.2 | 2.2 |
| NA | No | No | No | Complete |    | 0.6 | 0.7 |
| NA | No | No | No | Complete |    | 0.5 | 0.6 |



|    |    |    |    |          |    |      |     |
|----|----|----|----|----------|----|------|-----|
| NA | No | No | No | Complete |    | 0.7  | 0.7 |
| NA | No | No | No | Complete |    | 0.6  | 0.8 |
| NA | No | No | No | Complete |    | 2.4  | 3   |
| NA | No | No | No | Complete |    | 0.8  | 0.7 |
| NA | No | No | No | Complete |    | 1.4  | 1.7 |
| NA | No | No | No | Complete |    | 0.6  | 0.8 |
| NA | No | No | No | Complete | NA |      | 1.1 |
| NA | No | No | No | Complete |    | 0.7  | 0.8 |
| NA | No | No | No | Complete |    | 0.8  | 0.8 |
| y  | No | No | No | Complete |    | 0.6  | 0.6 |
| NA | No | No | No | Complete |    | 0.5  | 0.6 |
| NA | No | No | No | Complete |    | 1    | 1.1 |
| NA | No | No | No | Complete |    | 0.8  | 1.1 |
| y  | No | No | No | Complete |    | 0.8  | 0.7 |
| NA | No | No | No | Complete |    | 0.9  | 0.9 |
| NA | No | No | No | Complete |    | 0.8  | 0.8 |
| NA | No | No | No | Complete |    | 0.8  | 0.8 |
| NA | No | No | No | Complete |    | 1    | 1.3 |
| NA | No | No | No | Complete |    | 0.9  | 1   |
| NA | No | No | No | Complete |    | 0.6  | 0.6 |
| NA | No | No | No | Complete |    | 0.8  | 0.8 |
| NA | No | No | No | Complete |    | 3.1  | 3   |
| NA | No | No | No | Complete |    | 0.6  | 0.6 |
| NA | No | No | No | Complete |    | 1.4  | 1.9 |
| NA | No | No | No | Complete |    | 0.6  | 0.6 |
| NA | No | No | No | Complete |    | 1    | 0.8 |
| NA | No | No | No | Complete |    | 1.1  | 1   |
| NA | No | No | No | Complete |    | 0.6  | 0.7 |
| NA | No | No | No | Complete |    | 0.6  | 0.6 |
| NA | No | No | No | Complete |    | 1.2  | 1.4 |
| NA | No | No | No | Complete |    | 0.8  | 1.1 |
| NA | No | No | No | Complete |    | 1.7  | 1.7 |
| NA | No | No | No | Complete |    | 0.7  | 0.6 |
| NA | No | No | No | Complete |    | 0.7  | 0.8 |
| NA | No | No | No | Complete |    | 1.3  | 1.3 |
| NA | No | No | No | Complete | NA |      | 1   |
| y  | No | No | No | Complete |    | 4.5  | 6.6 |
| y  | No | No | No | Complete |    | 1.3  | 1.4 |
| NA | No | No | No | Complete |    | 0.7  | 0.8 |
| NA | No | No | No | Complete |    | 11.3 | 14  |
| y  | No | No | No | Complete |    | 1    | 1.3 |
| NA | No | No | No | Complete |    | 1.4  | 1.3 |
| NA | No | No | No | Complete |    | 1.2  | 1.9 |
| NA | No | No | No | Complete |    | 0.6  | 1.1 |
| NA | No | No | No | Complete |    | 1.2  | 1.2 |

|    |    |    |     |          |    |     |     |
|----|----|----|-----|----------|----|-----|-----|
| NA | No | No | No  | Complete |    | 0.6 | 0.7 |
| NA | No | No | No  | Complete |    | 0.4 | 0.6 |
| y  | No | No | No  | Complete |    | 0.7 | 1   |
| NA | No | No | No  | Complete |    | 1.3 | 1.3 |
| NA | No | No | No  | Complete |    | 0.4 | 1.1 |
| NA | No | No | No  | Complete |    | 1.3 | 1.7 |
| NA | No | No | No  | Complete |    | 1.2 | 1.8 |
| NA | No | No | No  | Complete |    | 0.6 | 0.7 |
| NA | No | No | No  | Complete |    | 1   | 1.1 |
| NA | No | No | No  | Complete |    | 2.2 | 2.2 |
| NA | No | No | No  | Complete | NA |     | 0.6 |
| NA | No | No | No  | Complete |    | 0.6 | 0.9 |
| NA | No | No | No  | Complete |    | 0.7 | 0.9 |
| NA | No | No | No  | Complete | NA |     | 0.8 |
| NA | No | No | No  | Complete |    | 0.6 | 0.6 |
| NA | No | No | No  | Complete |    | 0.7 | 0.8 |
| NA | No | No | No  | Complete |    | 1   | 1.6 |
| NA | No | No | No  | Complete |    | 1.1 | 1   |
| y  | No | No | No  | Complete |    | 1   | 0.9 |
| NA | No | No | No  | Complete |    | 0.6 | 0.6 |
| NA | No | No | No  | Complete |    | 1.4 | 1.6 |
| y  | No | No | No  | Complete |    | 0.9 | 0.9 |
| NA | No | No | No  | Complete |    | 1.1 | 1.1 |
| NA | No | No | No  | Complete |    | 1.2 | 1.2 |
| NA | No | No | No  | Complete |    | 0.7 | 0.7 |
| NA | No | No | No  | Complete | NA |     | 1.7 |
| NA | No | No | No  | Complete |    | 1.1 | 1.2 |
| NA | No | No | No  | Complete |    | 2.2 | 1.4 |
| NA | No | No | Yes | Complete |    | 0.9 | 0.8 |
| NA | No | No | No  | Complete |    | 0.9 | 0.8 |
| NA | No | No | No  | Complete |    | 1   | 1   |
| NA | No | No | No  | Complete |    | 0.7 | 1   |
| NA | No | No | No  | Complete |    | 1.2 | 1.5 |
| NA | No | No | No  | Complete |    | 1.1 | 1.4 |
| y  | No | No | No  | Complete |    | 0.8 | 0.8 |
| NA | No | No | No  | Complete |    | 1   | 1   |
| NA | No | No | No  | Complete |    | 0.7 | 0.8 |
| y  | No | No | No  | Complete | NA |     | 0.8 |
| NA | No | No | No  | Complete |    | 0.7 | 0.8 |
| NA | No | No | No  | Complete |    | 7.7 | 6.4 |
| NA | No | No | No  | Complete |    | 1.7 | 2   |
| NA | No | No | No  | Complete | NA | NA  |     |
| NA | No | No | No  | Complete |    | 1.2 | 1.3 |
| y  | No | No | No  | Complete |    | 1   | 1.1 |
| y  | No | No | No  | Complete |    | 7   | 6.1 |

|    |    |    |    |          |    |      |     |
|----|----|----|----|----------|----|------|-----|
| NA | No | No | No | Complete |    | 1.4  | 1.8 |
| NA | No | No | No | Complete |    | 0.4  | 0.5 |
| NA | No | No | No | Complete |    | 0.8  | 0.8 |
| NA | No | No | No | Complete |    | 0.5  | 0.5 |
| NA | No | No | No | Complete |    | 0.6  | 0.9 |
| NA | No | No | No | Complete |    | 0.7  | 1   |
| NA | No | No | No | Complete |    | 2.5  | 3.1 |
| NA | No | No | No | Complete |    | 0.8  | 0.8 |
| NA | No | No | No | Complete |    | 0.6  | 0.9 |
| NA | No | No | No | Complete |    | 0.6  | 0.7 |
| y  | No | No | No | Complete |    | 0.7  | 0.8 |
| NA | No | No | No | Complete |    | 0.5  | 0.6 |
| NA | No | No | No | Complete |    | 0.6  | 0.6 |
| NA | No | No | No | Complete |    | 0.7  | 0.8 |
| NA | No | No | No | Complete |    | 0.7  | 0.8 |
| NA | No | No | No | Complete |    | 0.6  | 0.9 |
| NA | No | No | No | Complete | NA |      | 0.7 |
| NA | No | No | No | Complete |    | 0.6  | 0.6 |
| NA | No | No | No | Complete |    | 0.8  | 1   |
| NA | No | No | No | Complete |    | 1.8  | 1.8 |
| y  | No | No | No | Complete |    | 0.7  | 0.9 |
| NA | No | No | No | Complete |    | 1    | 1.1 |
| NA | No | No | No | Complete |    | 0.6  | 0.5 |
| y  | No | No | No | Complete |    | 2.7  | 3.1 |
| NA | No | No | No | Complete |    | 0.5  | 0.6 |
| NA | No | No | No | Complete |    | 3.1  | 2.2 |
| y  | No | No | No | Complete |    | 0.8  | 0.9 |
| NA | No | No | No | Complete |    | 0.7  | 0.8 |
| NA | No | No | No | Complete |    | 5.1  | 5.2 |
| NA | No | No | No | Complete |    | 5.1  | 5.2 |
| NA | No | No | No | Complete | NA |      | 0.9 |
| NA | No | No | No | Complete |    | 1.2  | 1.2 |
| NA | No | No | No | Complete | NA |      | 1.2 |
| NA | No | No | No | Complete |    | 1.1  | 1.4 |
| NA | No | No | No | Complete |    | 0.5  | 0.6 |
| y  | No | No | No | Complete |    | 0.6  | 0.7 |
| NA | No | No | No | Complete |    | 1    | 1.4 |
| NA | No | No | No | Complete | NA |      | 1.1 |
| NA | No | No | No | Complete |    | 1    | 0.9 |
| NA | No | No | No | Complete |    | 0.6  | 0.8 |
| NA | No | No | No | Complete |    | 1.9  | 2.1 |
| NA | No | No | No | Complete |    | 14.4 | 13  |
| NA | No | No | No | Complete |    | 0.6  | 0.7 |
| NA | No | No | No | Complete |    | 1.2  | 1.4 |
| y  | No | No | No | Complete |    | 0.9  | 0.9 |

|    |    |    |    |          |    |      |      |
|----|----|----|----|----------|----|------|------|
| NA | No | No | No | Complete |    | 0.8  | 0.8  |
| NA | No | No | No | Complete |    | 0.5  | 0.5  |
| y  | No | No | No | Complete |    | 0.7  | 1    |
| NA | No | No | No | Complete |    | 0.9  | 0.8  |
| NA | No | No | No | Complete |    | 0.7  | 0.8  |
| NA | No | No | No | Complete |    | 0.9  | 1.3  |
| NA | No | No | No | Complete |    | 0.6  | 0.8  |
| NA | No | No | No | Complete |    | 4.7  | 4.7  |
| NA | No | No | No | Complete |    | 0.9  | 1.1  |
| NA | No | No | No | Complete |    | 1.1  | 1    |
| NA | No | No | No | Complete |    | 0.7  | 0.8  |
| NA | No | No | No | Complete |    | 0.9  | 1    |
| NA | No | No | No | Complete |    | 0.7  | 0.7  |
| NA | No | No | No | Complete |    | 0.9  | 1.2  |
| NA | No | No | No | Complete |    | 1.1  | 1    |
| NA | No | No | No | Complete |    | 0.7  | 0.9  |
| NA | No | No | No | Complete |    | 1.2  | 1.5  |
| NA | No | No | No | Complete |    | 0.4  | 0.6  |
| NA | No | No | No | Complete |    | 0.7  | 0.9  |
| NA | No | No | No | Complete | NA |      | 0.8  |
| NA | No | No | No | Complete |    | 0.9  | 1.4  |
| NA | No | No | No | Complete |    | 0.8  | 1    |
| NA | No | No | No | Complete |    | 1.3  | 1.5  |
| NA | No | No | No | Complete |    | 3.1  | 3.7  |
| NA | No | No | No | Complete |    | 1.3  | 2    |
| NA | No | No | No | Complete |    | 1.4  | 1.8  |
| NA | No | No | No | Complete |    | 0.4  | 0.6  |
| NA | No | No | No | Complete |    | 1    | 1.2  |
| NA | No | No | No | Complete |    | 1.6  | 1.1  |
| NA | No | No | No | Complete |    | 10.6 | 13.2 |
| NA | No | No | No | Complete | NA | NA   |      |
| y  | No | No | No | Complete |    | 1.8  | 2    |
| y  | No | No | No | Complete |    | 1.8  | 2    |
| NA | No | No | No | Complete |    | 1.6  | 1.6  |
| NA | No | No | No | Complete |    | 0.7  | 0.7  |
| NA | No | No | No | Complete |    | 0.7  | 0.8  |
| NA | No | No | No | Complete |    | 0.8  | 0.8  |
| NA | No | No | No | Complete |    | 0.8  | 1.3  |
| NA | No | No | No | Complete | NA |      | 1.9  |
| NA | No | No | No | Complete |    | 0.6  | 0.8  |
| y  | No | No | No | Complete |    | 7.1  | 5.4  |
| NA | No | No | No | Complete | NA |      | 1    |
| NA | No | No | No | Complete |    | 0.9  | 0.7  |
| y  | No | No | No | Complete |    | 0.7  | 0.7  |
| NA | No | No | No | Complete |    | 0.8  | 0.9  |

|    |    |    |    |          |     |      |      |
|----|----|----|----|----------|-----|------|------|
| NA | No | No | No | Complete | NA  |      | 6.5  |
| NA | No | No | No | Complete | NA  |      | 1.1  |
| NA | No | No | No | Complete |     | 0.7  | 0.8  |
| NA | No | No | No | Complete |     | 0.6  | 0.8  |
| NA | No | No | No | Complete |     | 0.8  | 0.8  |
| NA | No | No | No | Complete |     | 0.7  | 0.8  |
| NA | No | No | No | Complete |     | 1    | 1.1  |
| y  | No | No | No | Complete |     | 1.2  | 1.6  |
| NA | No | No | No | Complete |     | 3.3  | 3.6  |
| NA | No | No | No | Complete | NA  |      | 1.4  |
| NA | No | No | No | Complete | NA  |      | 1.4  |
| NA | No | No | NA | Complete | NA  |      | 1    |
| NA | No | No | No | Complete |     | 1.7  | 2.4  |
| NA | No | No | No | Complete |     | 0.6  | 0.7  |
| NA | No | No | No | Complete |     | 0.6  | 0.8  |
| NA | No | No | No | Complete |     | 11.2 | 11.2 |
| y  | No | No | No | Complete |     | 1.3  | 1.3  |
| NA | No | No | No | Complete |     | 0.6  | 1.2  |
| y  | No | No | No | Complete |     | 0.8  | 0.9  |
| NA | No | No | No | Complete | NA  |      | 0.7  |
| NA | No | No | No | Complete |     | 1.5  | 1    |
| NA | No | No | No | Complete |     | 0.8  | 0.8  |
| NA | No | No | No | Complete |     | 1.3  | 1.3  |
| NA | No | No | No | Complete |     | 2.5  | 2.9  |
| NA | No | No | No | Complete |     | 0.8  | 1    |
| NA | No | No | No | Complete |     | 1.8  | 1.8  |
| NA | No | No | No | Complete |     | 0.7  | 0.8  |
| NA | No | No | No | Complete |     | 1    | 1.4  |
| NA | No | No | No | Complete |     | 1    | 1.2  |
| NA | No | No | No | Complete | NA  |      | 1.4  |
| NA | No | No | No | Complete |     | 0.3  | 0.4  |
| NA | No | No | No | Complete |     | 3.8  | 4.3  |
| NA | No | No | No | Complete |     | 1.3  | 1.3  |
| NA | No | No | No | Complete |     | 1.1  | 1.1  |
| NA | No | No | No | Complete | TNP |      | 2.5  |
| NA | No | No | No | Complete |     | 1.2  | 1.1  |
| NA | No | No | No | Complete | NA  | NA   |      |
| NA | No | No | No | Complete |     | 1    | 1.3  |
| NA | No | No | No | Complete |     | 1    | 1.2  |
| y  | No | No | No | Complete |     | 0.8  | 0.9  |
| NA | No | No | No | Complete |     | 0.8  | 0.9  |
| NA | No | No | No | Complete |     | 1.2  | 0.8  |
| NA | No | No | No | Complete |     | 1.2  | 1.3  |
| NA | No | No | No | Complete |     | 0.7  | 0.8  |
| NA | No | No | No | Complete |     | 1.3  | 1.7  |

|    |     |    |    |          |    |     |     |
|----|-----|----|----|----------|----|-----|-----|
| NA | No  | No | No | Complete |    | 0.6 | 0.6 |
| NA | No  | No | No | Complete |    | 1   | 1.1 |
| NA | No  | No | No | Complete |    | 1.4 | 1.4 |
| NA | No  | No | No | Complete | NA |     | 1.2 |
| NA | No  | No | No | Complete |    | 0.5 | 0.7 |
| NA | No  | No | No | Complete |    | 0.9 | 1   |
| NA | No  | No | No | Complete |    | 0.7 | 0.8 |
| NA | No  | No | No | Complete |    | 1.8 | 1.2 |
| NA | No  | No | No | Complete |    | 0.9 | 1.1 |
| NA | No  | No | No | Complete |    | 0.6 | 0.7 |
| NA | No  | No | No | Complete |    | 0.5 | 0.5 |
| NA | No  | No | No | Complete |    | 1.5 | 1.8 |
| NA | No  | No | No | Complete |    | 0.6 | 0.7 |
| y  | No  | No | No | Complete |    | 1.9 | 2.3 |
| NA | No  | No | No | Complete |    | 1.6 | 1.4 |
| NA | No  | No | No | Complete |    | 1.4 | 1.4 |
| NA | No  | No | No | Complete |    | 0.6 | 0.7 |
| NA | No  | No | NA | Complete |    | 1   | 1.3 |
| NA | No  | No | No | Complete |    | 2.5 | 3   |
| NA | No  | No | No | Complete |    | 2.7 | 3   |
| NA | No  | No | No | Complete |    | 0.9 | 1.2 |
| NA | No  | No | No | Complete |    | 0.5 | 0.6 |
| NA | No  | No | No | Complete |    | 0.8 | 0.8 |
| NA | No  | No | No | Complete |    | 0.8 | 1.1 |
| NA | No  | No | No | Complete |    | 4.5 | 4.2 |
| NA | No  | No | No | Complete |    | 1.1 | 1.2 |
| NA | No  | No | No | Complete |    | 2.6 | 2.1 |
| NA | No  | No | No | Complete |    | 0.8 | 0.9 |
| NA | No  | No | No | Complete |    | 1.8 | 1.2 |
| NA | No  | No | No | Complete |    | 0.7 | 1   |
| NA | No  | No | No | Complete |    | 1.7 | 2.2 |
| NA | No  | No | No | Complete |    | 1   | 1   |
| NA | No  | No | No | Complete |    | 0.8 | 0.8 |
| y  | No  | No | No | Complete |    | 1.1 | 0.9 |
| NA | Yes | No | No | Complete |    | 0.5 | 0.6 |
| NA | Yes | No | No | Complete |    | 0.8 | 0.8 |
| NA | No  | No | No | Complete |    | 0.8 | 0.8 |
| y  | No  | No | No | Complete |    | 1   | 1.1 |
| NA | No  | No | No | Complete |    | 0.8 | 0.8 |
| NA | No  | No | No | Complete |    | 0.6 | 0.8 |
| NA | No  | No | No | Complete |    | 0.7 | 0.9 |
| NA | No  | No | No | Complete |    | 1   | 1.4 |
| NA | No  | No | No | Complete |    | 0.6 | 0.6 |
| NA | No  | No | No | Complete |    | 0.4 | 0.6 |
| NA | No  | No | No | Complete |    | 0.4 | 0.4 |

|    |    |     |    |          |    |     |     |
|----|----|-----|----|----------|----|-----|-----|
| y  | No | Yes | No | Complete |    | 0.5 | 0.8 |
| NA | No | No  | No | Complete |    | 0.5 | 0.6 |
| NA | No | No  | No | Complete |    | 0.9 | 1.1 |
| NA | No | No  | No | Complete |    | 0.7 | 1   |
| NA | No | No  | No | Complete |    | 8.4 | 8.4 |
| NA | No | No  | NA | Complete | NA |     | 0.7 |
| NA | No | No  | No | Complete |    | 0.6 | 0.7 |
| NA | No | No  | No | Complete |    | 2.4 | 1.8 |
| NA | No | No  | No | Complete |    | 0.9 | 1.1 |
| NA | No | No  | No | Complete |    | 0.6 | 0.9 |
| NA | No | No  | No | Complete |    | 0.7 | 0.8 |
| y  | No | No  | No | Complete |    | 0.7 | 0.7 |
| NA | No | No  | NA | Complete |    | 0.7 | 0.7 |
| NA | No | No  | No | Complete |    | 0.6 | 0.6 |
| NA | No | No  | No | Complete |    | 0.9 | 0.8 |
| NA | No | No  | No | Complete |    | 1.3 | 1.3 |
| NA | No | No  | No | Complete |    | 1.9 | 1.9 |
| NA | No | No  | No | Complete |    | 0.7 | 0.7 |
| NA | No | No  | No | Complete |    | 0.9 | 0.8 |
| NA | No | No  | No | Complete | NA |     | 0.8 |
| NA | No | No  | No | Complete |    | 0.7 | 0.7 |
| NA | No | No  | No | Complete |    | 1.1 | 1.1 |
| NA | No | No  | No | Complete |    | 1.6 | 1.7 |
| NA | No | No  | No | Complete |    | 0.7 | 0.8 |
| NA | No | No  | No | Complete |    | 0.7 | 1   |
| NA | No | No  | No | Complete | NA | NA  |     |
| NA | No | No  | No | Complete |    | 0.9 | 1   |
| NA | No | No  | No | Complete |    | 0.9 | 1.2 |
| NA | No | No  | No | Complete |    | 0.4 | 0.5 |
| NA | No | No  | No | Complete |    | 1.1 | 0.8 |
| NA | No | No  | No | Complete |    | 0.8 | 0.8 |
| NA | No | No  | No | Complete |    | 1.5 | 1   |
| y  | No | No  | No | Complete |    | 0.6 | 0.6 |
| NA | No | No  | No | Complete |    | 1.4 | 1.3 |
| y  | No | No  | No | Complete |    | 1   | 1.1 |
| NA | No | No  | No | Complete |    | 0.4 | 0.5 |
| NA | No | No  | No | Complete |    | 0.8 | 1   |
| NA | No | No  | No | Complete |    | 0.7 | 0.7 |
| NA | No | No  | No | Complete |    | 1   | 0.9 |
| NA | No | No  | No | Complete |    | 1.1 | 1.2 |
| NA | No | No  | No | Complete |    | 0.9 | 0.8 |
| NA | No | No  | No | Complete |    | 0.9 | 1.2 |
| NA | No | No  | No | Complete |    | 0.6 | 0.6 |
| NA | No | Yes | No | Complete |    | 0.8 | 0.8 |
| NA | No | No  | No | Complete |    | 0.8 | 1   |

|    |    |    |    |          |    |      |      |
|----|----|----|----|----------|----|------|------|
| NA | No | No | No | Complete |    | 1.2  | 1.8  |
| NA | No | No | No | Complete |    | 3    | 3    |
| NA | No | No | No | Complete |    | 0.6  | 1.4  |
| NA | No | No | No | Complete |    | 1.7  | 1.2  |
| NA | No | No | No | Complete |    | 1.1  | 1    |
| NA | No | No | No | Complete |    | 0.9  | 0.8  |
| NA | No | No | No | Complete | NA |      | 1    |
| NA | No | No | No | Complete |    | 0.6  | 0.6  |
| NA | No | No | No | Complete |    | 0.8  | 0.9  |
| NA | No | No | No | Complete |    | 0.7  | 0.7  |
| NA | No | No | No | Complete | NA |      | 2.8  |
| y  | No | No | No | Complete |    | 0.9  | 1    |
| NA | No | No | No | Complete |    | 0.9  | 1    |
| NA | No | NA | No | Complete |    | 8.6  | 5.3  |
| NA | No | No | No | Complete |    | 1.4  | 1.4  |
| NA | No | No | No | Complete |    | 1.1  | 1.1  |
| NA | No | No | No | Complete |    | 12.6 | 11.8 |
| NA | No | No | No | Complete |    | 4.5  | 4.2  |
| NA | No | No | No | Complete |    | 3.2  | 3.2  |
| NA | No | No | No | Complete |    | 1.9  | 1.4  |
| NA | No | No | No | Complete |    | 3.6  | 4    |
| NA | No | No | No | Complete |    | 5.3  | 5.4  |
| NA | No | No | No | Complete |    | 6.5  | 4.7  |
| NA | No | No | No | Complete |    | 1.1  | 1.4  |
| NA | No | No | No | Complete |    | 1.3  | 1.5  |
| NA | No | No | No | Complete |    | 0.7  | 0.8  |
| NA | No | No | No | Complete |    | 0.7  | 0.9  |
| NA | No | No | No | Complete |    | 0.4  | 0.5  |
| NA | No | No | No | Complete |    | 1.2  | 1.1  |
| NA | No | No | No | Complete |    | 0.7  | 0.9  |
| NA | No | No | No | Complete |    | 2.1  | 1.9  |
| NA | No | No | No | Complete |    | 0.7  | 0.7  |
| NA | No | No | No | Complete |    | 1.2  | 1.5  |
| y  | No | No | No | Complete |    | 0.5  | 0.5  |
| NA | No | No | No | Complete |    | 1    | 1.1  |
| NA | No | No | No | Complete |    | 1.1  | 1    |
| NA | No | No | No | Complete |    | 2    | 0.8  |
| NA | No | No | No | Complete |    | 1.2  | 1.3  |
| NA | No | No | No | Complete |    | 0.7  | 0.7  |
| y  | No | No | No | Complete |    | 0.8  | 0.8  |
| NA | No | No | No | Complete |    | 0.7  | 0.7  |
| y  | No | No | No | Complete |    | 2.2  | 2.5  |
| NA | No | No | No | Complete |    | 0.5  | 0.5  |
| NA | No | No | No | Complete |    | 0.5  | 0.4  |
| NA | No | No | No | Complete |    | 1.1  | 1.1  |



|    |     |    |    |          |     |     |
|----|-----|----|----|----------|-----|-----|
| NA | No  | No | No | Complete | 0.8 | 0.8 |
| NA | No  | No | No | Complete | 1.1 | 1.4 |
| NA | No  | No | No | Complete | 1.1 | 1.4 |
| NA | Yes | No | No | Complete | 1.1 | 1.4 |
| y  | No  | No | No | Complete | 0.8 | 0.9 |
| NA | No  | No | No | Complete | 1.1 | 1.3 |
| NA | No  | No | No | Complete | 1   | 1.2 |

|          |          |          |    |       |         |       |       |    |     |
|----------|----------|----------|----|-------|---------|-------|-------|----|-----|
| NA       |          | 106      | NA |       | 94.2    | NA    | NA    |    | 1.1 |
|          | 506      | 462      | NA |       | 0.3     | NA    | < 215 |    | 1.1 |
|          | 769      | 769      |    | 50.3  | 50.3    | 1419  | 1419  |    | 1.3 |
| NA       | NA       | NA       | NA | NA    | NA      | NA    | NA    | NA |     |
|          | 1075     | 1155     |    | 140.5 | 105.5   | 476   | 611   |    | 1.2 |
| NA       | NA       | NA       | NA | NA    | NA      | NA    | NA    | NA |     |
|          | 1128     | 1128     |    | 25.2  | 83.6    | 694   | 694   |    | 1.2 |
|          | 539      | 539      |    | 35.4  | 36.4    | 1327  | 1327  |    | 1.2 |
|          | 725      | 770      |    | 177.6 | 189     | 229   | 229   |    | 1.2 |
| NA       | NA       | NA       |    |       | 34.1    | NA    | NA    | NA |     |
| NA       | NA       |          |    | 14.1  | 14.1    | < 215 | < 215 |    | 1.2 |
|          | 388      | 804      |    | 145.7 | 132.3   | 6207  | 6207  |    | 1.2 |
|          | 244      | 244      |    | 155.8 | 113.5   | 414   | 414   |    | 1.1 |
|          | 1290.3   | 1290.3   |    | 299   | 299     | NA    | 788   |    | 1.2 |
| NA       |          | 363      | NA |       | 199.1   | NA    | 1148  |    | 1.2 |
| > 1650.0 | > 1650.0 |          |    | 40.2  | 93.9    | NA    | 765   |    | 1.2 |
|          | 781      | 743      |    | 139.1 | 264     | NA    | < 215 |    | 1.3 |
|          | 158      | 158      | NA | NA    | NA      | NA    | NA    |    | 1.2 |
| NA       | NA       | NA       | NA | NA    | NA      | NA    | NA    |    | 1   |
| NA       | > 1650.0 | NA       |    |       | 178.8   | 4197  | 4197  |    | 1.1 |
|          | 380      | 291      |    | 151   | 157.2   | 2546  | 2546  |    | 1.2 |
|          | 1132     | 78       |    | 252.4 | 22.7    | 627   | 627   |    | 1.4 |
| NA       |          | 489      | NA |       | 192     | NA    | NA    |    | 1.1 |
|          | 1008     | 1008     |    | 51.2  | 51.2    | NA    | NA    |    | 1   |
|          | 4        | 4        | NA | NA    | NA      | NA    | NA    |    | 1.2 |
| > 1650.0 | > 1650.0 |          |    | 124.4 | 122.5   | NA    | NA    |    | 1.3 |
|          | 125      | 125      |    | 42.3  | 42.3    | 19112 | 19112 |    | 1.2 |
|          | 220      | 184      |    | 155.7 | > 156.0 | 403   | 403   |    | 1.3 |
| NA       | NA       |          |    | 173.3 | 28.9    | NA    | NA    |    | 1.2 |
| NA       | NA       | NA       | NA | NA    | NA      | NA    | NA    |    |     |
| > 1650.0 | > 1650.0 |          |    | 138.8 | 135.2   | 1202  | 1202  |    | 1.3 |
|          | 10       | 10       | NA | NA    | NA      | NA    | NA    |    |     |
| > 1650.0 | > 1650.0 |          |    | 61.8  | 48.9    | NA    | NA    |    | 1.4 |
|          | 777      | 777      |    | 102.7 | 128.4   | NA    | NA    |    | 1.2 |
|          | 3226.8   | > 1650.0 |    | 212.8 | 204.4   | NA    | 767   |    | 1.3 |
|          | 651      | 340      |    | 449.8 | 398.9   | 537   | 427   |    | 1.4 |
| NA       | NA       | NA       |    |       | 153.8   | 725   | 725   |    | 1.2 |
| NA       | > 1650.0 | NA       |    |       | 116.3   | NA    | NA    |    | 1.2 |
|          | 594      | 594      |    | 157.3 | 157.3   | 1166  | 1166  | NA |     |
| > 1650.0 | > 1650.0 |          |    | 163.5 | 153.8   | 4620  | 4620  |    | 1.2 |
| > 1650.0 | > 1650.0 |          |    | 93.9  | 124.6   | 693   | 693   |    | 1.1 |
| NA       |          | 994      | NA |       | 68.6    | NA    | NA    |    | 1   |
| NA       | NA       | NA       | NA |       | 89.2    | NA    | NA    |    | 1.3 |
| NA       |          | 107      | NA |       | 8.5     | NA    | NA    |    | 1.1 |
|          | 457      | 457      | NA |       | 120.2   | 291   | 291   |    | 1.2 |

|          |          |          |       |       |       |       |      |
|----------|----------|----------|-------|-------|-------|-------|------|
| NA       | NA       | NA       | NA    | NA    | NA    | NA    | 0.9  |
|          | 391      | 391      | 19.6  | 19.6  | NA    | 883   | 1.1  |
|          | 268      | 268      | 19.2  | 19.2  | NA    | NA    | 1.1  |
| > 1650.0 | > 1650.0 |          | 495.3 | 154.5 | 31461 | 4439  | NA   |
| NA       | > 1650.0 | NA       |       | 147.1 | 904   | 904   | 1.3  |
|          | 856      | 856      | 21    | 21    | NA    | NA    | NA   |
| NA       | NA       | NA       | NA    | NA    | NA    | NA    | 1.1  |
|          | 1391     | 1320     | 230.2 | 257.6 | 2496  | 1416  | 1.2  |
|          | 506      | 451      | 145.8 | 155   | 562   | 517   | 1.2  |
|          | 944      | > 1650.0 | NA    | 2.8   | NA    | NA    | 1    |
|          | 287      | 287      | 122.7 | 93.3  | 465   | 465   | 1.1  |
| NA       | NA       | NA       | NA    | NA    | NA    | NA    | 1.1  |
| NA       | NA       | NA       |       | 158.2 | NA    | NA    | 1.1  |
| NA       | NA       | NA       | NA    | NA    | NA    | NA    | 1.3  |
|          | 453      | 373      | NA    | 99.3  | 512   | 512   | 1.4  |
|          | 1511     | 1304     | 132   | 110.8 | 868   | 868   | 1.1  |
| > 1650.0 |          | 1446     | 117.3 | 153.1 | 465   | 465   | 1.3  |
| NA       |          | 1082     | NA    | 149.9 | 7279  | 7279  | 1.2  |
| NA       | NA       | NA       | NA    | NA    | NA    | NA    |      |
|          | 545      | 622      | 165   | 182.8 | 25287 | 25287 | 1.3  |
|          | 142      | 240      | 38.8  | 150.4 | 611   | 395   | 1.3  |
| > 1650.0 |          | 986      | 173.3 | 110.2 | 1768  | 1768  | 1.3  |
|          | 1450     | 1450     | 203   | 196.7 | 95733 | 95733 | 1.2  |
| NA       | NA       | NA       |       | 78.6  | 687   | 687   | 1.1  |
| > 1650.0 | > 1650.0 |          | 90.2  | 138   | 586   | 699   | NA   |
| > 1650.0 | > 1650.0 |          | 203.7 | 204.7 | 786   | 786   | 1.3  |
|          | 470      | 470      | 114.4 | 23.1  | 678   | 678   | 1.1  |
|          | 649      | 1369     | NA    | 17.6  | NA    | 1177  | 1.1  |
|          | 1246     | 1246     | 87.4  | 87.4  | 6739  | 6739  | 1.5  |
|          | 667      | 667      | 152.1 | 152.1 | 2184  | 2184  | 14.4 |
|          | 442      | 667      | 8.3   | 1     | NA    | NA    | 1    |
|          | 414      | 414      | NA    | NA    | NA    | 562   | 1.1  |
|          | 1587     | > 1650.0 | 172.4 | 243.5 | 621   | 621   | 1.3  |
|          | 354      | 354      | 267.5 | 141.4 | 1016  | 1016  | 1.7  |
|          | 33       | 33       | 0.7   | 0.7   | 394   | 394   | 1    |
| NA       |          | 949      | NA    | 68.2  | NA    | NA    | 1.7  |
|          | 464      | 294      | 141   | 51.5  | 2095  | 2095  | 1.5  |
| > 1650.0 |          | 139      | 359.1 | 190.7 | 1142  | 1142  | 1.3  |
|          | 57       | 57       | NA    | NA    | 599   | 599   | NA   |
| NA       | NA       | NA       |       | 7.5   | NA    | 4737  | 1.1  |
|          | 823      | 1006     | 30.3  | 32.2  | 759   | 690   | 1.1  |
| NA       | NA       | NA       | NA    | NA    | NA    | NA    | 2.6  |
| NA       |          | 332      | 49.2  | 143.3 | 1035  | 1035  | 1.1  |
|          | 1606     | 1272     | 90.8  | 20.6  | 2407  | 2407  | 1.2  |
| > 1650.0 |          | 1312     | 140.5 | 137.5 | 1462  | 1462  | 1.2  |

|          |          |      |    |       |       |       |        |     |
|----------|----------|------|----|-------|-------|-------|--------|-----|
|          | 192      | 339  | NA |       | 86.5  | 6700  | 6700   | 1.5 |
| NA       | NA       | NA   | NA | NA    | NA    | NA    |        | 1.2 |
|          | 453      | 453  |    | 23.8  | 17.3  | 8911  | 8911   | 1.2 |
|          | 51       | 85   |    | 29.4  | 25.4  | 833   | 1039   | 1.3 |
| NA       | NA       | NA   | NA | NA    | NA    | NA    |        | 1.4 |
| NA       | NA       | NA   |    |       | 37.8  | NA    | NA     |     |
| NA       | NA       | NA   | NA | NA    | NA    | NA    | NA     |     |
| NA       |          | 1326 | NA |       | 292.8 | NA    | NA     | 1.2 |
|          | 257      | 257  | NA |       | 18.3  | 536   | 536    | 1.1 |
|          | 741      | 1006 |    | 78.5  | 85.4  | 3166  | 3166   | 1.3 |
| NA       |          | 624  | NA |       | 2.6   | NA    |        | 1.1 |
| NA       |          | 230  | NA |       | 7.6   | NA    | 608    | 0.9 |
|          | 408      | 408  | NA |       | 141.5 | NA    | NA     | 1.3 |
| > 1650.0 |          | 594  |    | 146.4 | 59.6  | 580   | 580    | 1.9 |
| NA       | NA       | NA   | NA | NA    | NA    | NA    |        | 1.1 |
|          | 339      | 339  | NA |       | 276.9 | NA    | NA     | 1.2 |
|          | 950      | 1330 |    | 65.6  | 79    | 835   | 835    | 1.4 |
| NA       | NA       | NA   | NA | NA    | NA    | NA    |        | 1   |
| > 1650.0 |          | 522  |    | 159.2 | 143.9 | 7941  | 111621 | 1.5 |
| NA       |          | 53   | NA |       | 17.3  | NA    | 576    | 1.1 |
| NA       | NA       | NA   | NA | NA    |       | 411   | 411    | NA  |
|          | 268      | 339  | NA |       | 24.9  | NA    | 1314   | 1.3 |
|          | 1567     | 1252 |    | 409.9 | 397.3 | 1624  | 1624   | 1.4 |
| NA       |          | 179  | NA |       | 30.9  | 1932  | 1932   | 1.2 |
|          | 550      | 550  |    | 10.4  | 10.4  | 12693 | 12693  | 1   |
|          | 1547     | 1547 |    | 23.4  | 23.4  | 4100  | 4100   | 1.4 |
|          | 1480     | 1480 |    | 145.8 | 261.8 | 17014 | 17014  | 1.3 |
|          | 732      | 712  |    | 280.8 | 295.1 | 477   | 477    | 1.7 |
|          | 184      | 211  |    | 159.5 | 168   | 805   | 984    | 1.2 |
|          | 368      | 454  |    | 268.9 | 223.2 | 26070 | 26070  | 1.3 |
|          | 778      | 778  |    | 153.9 | 153.9 | 1024  | 1024   | 1.4 |
| NA       | NA       |      |    | 255.1 | 194.9 | TNP   | TNP    | 1.2 |
| > 1650.0 | > 1650.0 |      |    | 128.9 | 134.4 | 1381  | 1381   | 1.3 |
| NA       | NA       | NA   |    |       | 16.8  | NA    | NA     | NA  |
|          | 248      | 269  |    | 148.1 | 126.4 | 1943  | 1943   | 1.9 |
| NA       | NA       |      |    | 26.4  | 22    | NA    | NA     | 1   |
| NA       | NA       | NA   |    |       | 182.2 | NA    | NA     | 1.1 |
| NA       |          | 11   | NA |       | 0.1   | NA    | 384    | 1   |
|          | 208      | 208  |    | 182.7 | 182.7 | 21727 | 21727  | 1.2 |
| NA       | NA       | NA   |    |       | 123.2 | NA    | NA     | 1.1 |
|          | 778      | 778  | NA |       | 167.3 | 1089  | 1089   | 1.3 |
|          | 166      | 166  |    | 150.2 | 15.2  | 1863  | 1863   | 1.4 |
|          | 140      | 140  |    | 5.3   | 5.3   | 3333  | 3333   | 1.3 |
|          | 968      | 974  |    | 154.8 | 147.7 | NA    | NA     | 1.3 |
| NA       | NA       | NA   |    |       | 405.1 | NA    | NA     | 1.5 |

|          |          |      |       |       |       |      |      |     |
|----------|----------|------|-------|-------|-------|------|------|-----|
| > 1650.0 | > 1650.0 |      | 34.8  | 34.8  | NA    | NA   | NA   |     |
|          | 1207     | 1207 | NA    |       | 21.8  | 4572 | 4572 | 1.6 |
| > 1650.0 | > 1650.0 |      | 180.6 | 273.8 | 1194  | 1194 |      | 1.4 |
|          | 889      | 889  |       | 271.6 | 116.4 | 812  | 812  | 1.2 |
| NA       | NA       | NA   |       |       | 35.5  | NA   | NA   | 1.1 |
| > 1650.0 | > 1650.0 |      | 269.7 | 193.4 | NA    |      | 448  | 1.3 |
| NA       | NA       | NA   |       | NA    | NA    | NA   | NA   |     |
|          | 479      | 1360 |       | 146.9 | 322.7 | 1569 | 1569 | 1.4 |
| NA       | NA       |      |       | 116.8 | 117.6 | 672  | 672  | 1.2 |
| NA       | NA       | NA   |       | NA    | NA    | NA   | NA   | 1.3 |
|          | 486      | 486  |       | 4.9   | 4.9   | 2278 | 2278 | NA  |
| NA       | NA       |      |       | 223.3 | 211.4 | NA   | NA   | NA  |
|          | 1521     | 1521 |       | 66.8  | 66.8  | 1242 | 1242 | 1.1 |
| > 1650.0 |          | 537  |       | 143.3 | 19.8  | 510  | 510  | 1.1 |
|          | 1416     | 1416 |       | 95.1  | 79.7  | NA   | NA   | 1.2 |
| > 1650.0 | > 1650.0 |      | 136.4 | 136.4 | 613   | 613  |      | 1.5 |
| NA       | NA       | NA   |       |       | 74.7  | NA   | NA   | 1.8 |
| > 1650.0 | > 1650.0 |      | 203.7 | 74.2  | NA    | NA   |      | 1.1 |
| > 1650.0 | > 1650.0 |      | 302   | 294.3 | 575   | 575  |      | 1.3 |
|          | 1605     | 1525 |       | 92.1  | 89.6  | 3420 | 3420 | 1.4 |
|          | 429      | 503  |       | 2.8   | 1.7   | 1917 | 1917 | 1.1 |
| NA       |          | 1562 | NA    |       | 61.7  | 579  | 813  | 1.1 |
|          | 382      | 452  |       | 16.3  | 17.1  | 1292 | 1292 | 1.6 |
| > 1650.0 | > 1650.0 |      | 29.8  | 33.5  | 624   | 624  |      | 1.1 |
|          | 703      | 756  |       | 218.3 | 176   | 377  | 377  | 1.1 |
| NA       | NA       | NA   |       | NA    | NA    | NA   | NA   |     |
| NA       |          | 801  | NA    |       | 149.1 | NA   | NA   | 1.2 |
| NA       |          | 120  | NA    | NA    | NA    | NA   | NA   | 1.5 |
| NA       |          | 468  | NA    |       | 31    | NA   | NA   |     |
| NA       | NA       | NA   |       | NA    | NA    | NA   | NA   |     |
| NA       | NA       | NA   |       |       | 15.7  | NA   | NA   | 1.1 |
| NA       | NA       |      |       | 9.1   | 9.1   | NA   | NA   |     |
|          | 56       | 56   |       | 5     | 5     | 631  | 631  | 9.5 |
|          | 498      | 620  |       | 76.4  | 58.5  | 665  | 665  | 1.4 |
|          | 515      | 578  |       | 337.7 | 150.5 | 1881 | 1881 | 1.6 |
|          | 110      | 158  |       | 46.2  | 154.9 | 1099 | 2359 | 1.3 |
|          | 649      | 838  |       | 124.8 | 129.1 | 1421 | 1421 | 1.2 |
| > 1650.0 | > 1650.0 |      | 315.2 | 315.2 | 1691  | 1691 | NA   |     |
| NA       | NA       | NA   |       |       | 9.3   | NA   | NA   |     |
| NA       | NA       | NA   |       |       | 9.3   | NA   | NA   |     |
| > 1650.0 | > 1650.0 |      | 254   | 254   | NA    | NA   | NA   |     |
| NA       | NA       | NA   |       | NA    |       | 273  | 273  | NA  |
|          | 466      | 466  | NA    |       | 147.6 | NA   | NA   | 1.2 |
|          | 896      | 1181 |       | 89.8  | 94.6  | 1261 | 1404 | 1.1 |
| NA       |          | 469  |       | 390.2 | 309.9 | 5000 | 1768 | 1.2 |

|          |          |      |       |       |        |        |      |
|----------|----------|------|-------|-------|--------|--------|------|
| NA       | > 1650.0 | NA   |       | 94.9  | 6165   | 6165   | 1.3  |
| NA       | > 1650.0 | NA   |       | 94.9  | 6165   | 6165   | 1.3  |
| NA       | NA       | NA   | NA    | NA    | NA     |        | 1.1  |
| NA       | NA       | NA   | NA    | NA    | NA     | NA     |      |
|          | 224      | 224  | 8.9   | 8.9   | 534    | 534    | NA   |
|          | 993      | 1041 | 145.3 | 148.7 | 18712  | 18712  | 1.1  |
| NA       | NA       |      | 4.4   | 136   | 1860   | 1860   | 1.3  |
|          | 1583     | 1583 | 78.5  | 78.5  | 2489   | 2489   | 1.2  |
| NA       | NA       | NA   | NA    | NA    | NA     |        | 1    |
|          | 1167     | 1167 | 97.1  | 97.1  | 880    | 880    | 1.3  |
| NA       |          | 793  | 286.9 | 173.4 | 1512   | 2086   | 1.1  |
|          | 1564     | 1564 | 263.6 | 259.6 | NA     | NA     | 1.2  |
| NA       | NA       | NA   | NA    | NA    | NA     | NA     |      |
| NA       | NA       | NA   |       | 208.1 | NA     | NA     | 1.1  |
|          | 293      | 322  | 23.8  | 34.3  | NA     | NA     | 1.2  |
|          | 321      | 321  | NA    | 37.3  | NA     | 363    | 1.1  |
| NA       |          | 185  | NA    | 86.1  | NA     | NA     | 1.1  |
|          | 760      | 716  | 43.9  | 41.7  | 538    | 538    | 1.3  |
| NA       | NA       | NA   |       | 3     | NA     | NA     | 1.2  |
| NA       | > 1650.0 |      | 418.7 | 492.6 | 646    | 653    | 1.7  |
| NA       |          | 282  | NA    | 1.5   | NA     | NA     | 1.4  |
|          | 910      | 907  | 142.8 | 152.7 | NA     | NA     | 1.3  |
| > 1650.0 |          | 1331 | 174.4 | 193.2 | 6302   | 17916  | 1.5  |
| NA       |          | 402  | NA    | 33.7  | NA     | NA     | 1    |
| NA       | NA       | NA   |       | 76.8  | NA     | NA     | 0.9  |
| > 1650.0 | > 1650.0 |      | 138.1 | 135.6 | NA     | NA     | 1.2  |
| > 1650.0 | > 1650.0 |      | 264.3 | 219.7 | 1731   | 1959   | 1.4  |
| NA       | NA       |      | 30.9  | 16    | NA     | NA     | 1.1  |
|          | 228      | 228  | 154.3 | 154.3 | 1997   | 1997   | 1.4  |
| > 1650.0 | > 1650.0 |      | 316.6 | 242.8 | 58843  | 58843  | 1.4  |
| NA       |          | 435  | NA    | 333.4 | 44808  | 44808  | 1.4  |
|          | 49       | 49   | NA    | NA    | 949    | 949    | 1.1  |
| > 1650.0 | > 1650.0 |      | 203.6 | 165.8 | 109629 | 109629 | 1.3  |
| NA       |          | 142  | NA    | NA    | NA     | NA     | 1.1  |
|          | 430      | 431  | 149.5 | 158.6 | 1351   | 1351   | 1.1  |
| NA       |          | 1240 | NA    | 64.3  | NA     | NA     | 1.6  |
| NA       |          | 247  | 64.8  | 86.6  | NA     | NA     | 1.1  |
|          | 541      | 382  | 109.8 | 143.4 | 587    | 587    | 1.5  |
| NA       |          | 244  | 72    | 92.6  | 1189   | 1438   | 1.2  |
|          | 1258     | 1258 | 39.5  | 37.9  | NA     | NA     | NA   |
| NA       |          | 818  | NA    | 214.6 | NA     | NA     | 1.2  |
|          | 874      | 456  | 199.8 | 209.6 | 387    | 297    | 1.3  |
| NA       | NA       | NA   |       | 37.5  | NA     | NA     | 1.1  |
| NA       |          | 500  | NA    | 142.8 | 224    | 224    | 1.3  |
| NA       | NA       | NA   |       | 157.9 | NA     | NA     | 17.3 |

|          |          |          |       |       |       |       |     |
|----------|----------|----------|-------|-------|-------|-------|-----|
| NA       | > 1650.0 | NA       |       | 476.4 | 7396  | 7396  | 1.7 |
| NA       | NA       |          | 45.7  | 35    | NA    | NA    | 1.2 |
|          | 57       | 17       | 62.6  | 0.1   | NA    | NA    | 1.5 |
| NA       | NA       |          | 316.9 | 113.5 | NA    | NA    | 1.3 |
| > 1650.0 |          | 1566     | 204.4 | 244.3 | 1416  | 541   | 1.2 |
| > 1650.0 | > 1650.0 |          | 392.8 | 311.7 | 2417  | 2417  | 1.5 |
|          | 1501     | > 1650.0 | 7.6   | 1.4   | 1125  | 1020  | 1.1 |
|          | 1242     | 1279     | 138.6 | 131.7 | 4251  | 384   | 1.3 |
| NA       | NA       | NA       |       | 11.5  | NA    | NA    | 1.1 |
| NA       |          | 1158     | NA    | 154.5 | NA    | NA    | 1.1 |
| NA       | NA       | NA       | NA    | NA    | NA    | NA    |     |
| > 1650.0 | > 1650.0 |          | 117.6 | 120.9 | 1804  | 1804  | 1.2 |
| NA       |          | 813      | NA    | 96    | NA    | NA    | 1.3 |
| NA       | > 1650.0 |          | 39.1  | 92.6  | 421   | 824   | 1.6 |
| > 1650.0 | > 1650.0 |          | 295.4 | 148   | 896   | 896   | 1.6 |
| NA       |          | 547      | NA    | 15.8  | 826   | 826   | 1.1 |
|          | 373      | 373      | NA    | 94.6  | 536   | 536   | 2.1 |
|          | 1637     | 1182     | 354   | 267.8 | 1786  | 1786  | 1.1 |
| NA       |          | 1501     | NA    | 39.7  | 816   | 816   | 1.2 |
| NA       | NA       | NA       |       | 215.5 | NA    | NA    | 1.6 |
| NA       |          | 820      | NA    | 146.4 | 303   | 303   | 1.2 |
| > 1650.0 | > 1650.0 |          | 93    | 93    | 1335  | 1335  | NA  |
| > 1650.0 | > 1650.0 | NA       | NA    |       | 5031  | 5031  | 1   |
|          | 173      | 173      | NA    | 166.1 | 1349  | 1206  | 1.2 |
|          | 1268     | 1268     | 83.9  | 83.9  | 1106  | 1106  | 1.2 |
| NA       |          | 295      | NA    | 3.8   | 509   | 509   | 1.1 |
| NA       | > 1650.0 | NA       |       | 166.8 | NA    | 1631  | 1.2 |
| NA       |          | 136      | NA    | 9.5   | NA    | TNP   |     |
|          | 187      | 210      | NA    | 85.8  | 1282  | 1346  | 1.2 |
| NA       | NA       | NA       | NA    | NA    | NA    | NA    |     |
| > 1650.0 | > 1650.0 |          | 142   | 118.2 | 413   | 413   | 1.2 |
| NA       |          | 668      | NA    | 169.9 | 3938  | 3938  | 1.1 |
| > 1650.0 | > 1650.0 |          | 188   | 188   | 5429  | 5429  | NA  |
|          | 301      | 301      | 0.3   | 0.4   | 898   | 1608  | 1.1 |
|          | 1552     | 1552     | 32.8  | 115.6 | NA    | NA    | 1.1 |
| NA       |          | 296      | NA    | 244.7 | 14559 | 52413 | 1.2 |
| NA       | NA       |          | 27.6  | 27.6  | 2390  | 2390  | 1   |
| NA       |          | 1069     | 268.6 | 242.6 | 1693  | 1693  | 2.4 |
|          | 1563     | 1563     | 444.4 | 444.4 | 21339 | 21339 | 1.3 |
|          | 1450     | 1450     | NA    | 154.9 | 645   | 645   | 1.3 |
|          | 1450     | 1450     | NA    | 154.9 | 645   | 645   | 1.3 |
| NA       | NA       | NA       |       | 57.3  | NA    | NA    | 1.1 |
| NA       | NA       | NA       |       | 106.7 | NA    | NA    | 1.2 |
|          | 722      | 734      | 86.5  | 71.1  | 563   | 563   | 1.2 |
|          | 680      | 501      | 64.4  | 49.3  | 516   | 516   | 1   |

|          |          |      |       |       |       |       |     |
|----------|----------|------|-------|-------|-------|-------|-----|
| NA       | NA       | NA   | NA    | NA    | 577   | NA    |     |
| > 1650.0 | > 1650.0 |      | 82.2  | 37.6  | 450   | 450   | 1.1 |
|          | 220      | 220  | 434.6 | 434.6 | 460   | 460   | 1.3 |
|          | 24       | 24   | 12.5  | 23.8  | 1558  | 1446  | 1.4 |
| NA       |          | 470  | NA    | 26.8  | NA    | NA    | 1.3 |
| NA       |          | 68   | NA    | 142.3 | NA    | NA    | 1.8 |
| > 1650.0 | > 1650.0 |      | 255.2 | 242.5 | 465   | 465   | 1.4 |
|          | 835      | 520  | 65    | 128.3 | NA    | NA    | 1.1 |
| NA       |          | 700  | NA    | 126   | NA    | NA    | 1.3 |
|          | 87       | 87   | 5.5   | 5.5   | 390   | 390   | 1.1 |
| NA       | NA       |      | 7.9   | 7.9   | 338   | 338   | 1   |
|          | 623      | 448  | 142.4 | 146.1 | 1113  | 1113  | 1   |
| > 1650.0 | > 1650.0 |      | 360.4 | 299.6 | 12896 | 3619  | 1.3 |
| NA       | NA       | NA   |       | 45.7  | NA    | NA    | 1.3 |
| NA       | NA       | NA   | NA    | NA    | NA    | NA    | 1   |
|          | 734      | 734  | 102.4 | 44.6  | 3122  | 5836  | 1.4 |
|          | 834      | 834  | 42.4  | 42.4  | 534   | 534   | NA  |
| > 1650.0 | > 1650.0 | NA   |       | 43.7  | 4618  | 4618  | 1   |
|          | 36       | 36   | 66.7  | 66.7  | NA    | NA    | 1.3 |
|          | 720      | 782  | 38.6  | 44.1  | NA    | NA    | 1.5 |
| NA       |          | 832  | NA    | 30.7  | NA    | NA    | 1.3 |
| > 1650.0 |          | 1601 | 200.5 | 163.3 | 1511  | 1262  | 1.3 |
| > 1650.0 | > 1650.0 |      | 200.3 | 211.4 | 281   | 281   | 1.3 |
| NA       | NA       | NA   | NA    | NA    | NA    | NA    | 1.1 |
| NA       | NA       | NA   | NA    | NA    | NA    | NA    | 1   |
| NA       |          | 1040 | 95.8  | 232.9 | 946   | 946   | 1   |
|          | 387      | 387  | 110.5 | 187.1 | 2522  | 2522  | 1.1 |
| NA       | NA       | NA   |       | 34.3  | 883   | 883   | 1.1 |
| NA       |          | 76   | NA    | 53.3  | 496   | 496   | 1.1 |
|          | 612      | 638  | 153.6 | 174.8 | 19174 | 19174 | 1.2 |
| > 1650.0 | > 1650.0 | NA   |       | 142.6 | 1362  | 1362  | 1.4 |
| NA       |          | 1243 | NA    | 210.7 | 5845  | 62857 | 1.4 |
| NA       |          | 295  | NA    | 155.3 | NA    | NA    | 1   |
|          | 212      | 212  | 33.1  | 33.1  | 1619  | 1619  | 1.1 |
|          | 189      | 189  | 12.5  | 12.5  | 3420  | 3420  | 1.1 |
|          | 1372     | 780  | 44    | 150.5 | 3749  | 12114 | 1.1 |
| > 1650.0 | > 1650.0 |      | 183.5 | 183.5 | 1306  | 1306  | 1.1 |
|          | 416      | 166  | 220.6 | 196.3 | 326   | 268   | 4   |
|          | 239      | 252  | 72.1  | 53    | 862   | 862   | 1.1 |
|          | 1634     | 1634 | 137.5 | 108   | NA    | NA    | NA  |
|          | 661      | 876  | 111   | 150.1 | 84843 | 84843 | 1.3 |
|          | 1222     | 1208 | 136.8 | 107.1 | 33773 | 33773 | 1.2 |
| NA       | NA       | NA   | NA    | NA    | NA    | NA    | 1.4 |
| NA       | NA       | NA   | NA    | NA    | NA    | NA    | NA  |
|          | 354      | 308  | 1.3   | 2.1   | 595   | 595   | 0.9 |



|          |          |         |         |          |        |         |     |
|----------|----------|---------|---------|----------|--------|---------|-----|
|          | 1324     | 1566    | 230.5   | 149.5    | 1025   | 1025    | 1.4 |
|          | 352      | 222     | 89.3    | 81       | 1300   | 1283    | 1.1 |
|          | 213      | 213     | 24.3    | 24.3 NA  | NA     | NA      |     |
| NA       |          | 2041 NA |         | 272.6 NA |        | 7577    | 1.6 |
| NA       | NA       |         | 108.2   | 108.2 NA | NA     |         | 1.2 |
|          | 574      | 574     | 123.5   | 123.5 NA | NA     |         | 1.2 |
| NA       | NA       | NA      |         | 62.5 NA  | NA     |         | 1.2 |
|          | 1308     | 1572    | 38.2    | 150.5    | 1003   | 1003    | 1.2 |
|          | 72       | 50      | 97.3    | 48.8     | 460    | 262     | 1.1 |
|          | 44       | 44 NA   |         | 9.6      | 1822   | 1822    | 1   |
|          | 242      | 242 NA  |         | 51.7 NA  |        | 1944    | 1.2 |
|          | 55       | 46      | 38.7    | 37.9     | 2480   | 5201    | 1.1 |
|          | 646      | 646     | 48.6    | 48.6     | 6336   | 6336 NA |     |
|          | 371      | 371     | 151.6   | 86.6     | 591    | 591     | 1.3 |
| NA       | NA       | NA      |         | 41.2 NA  | NA     |         | 1.2 |
|          | 46       | 58 NA   |         | 27.1 NA  |        | 673     | 1.1 |
| > 1650.0 | > 1650.0 |         | 129.8   | 110.9    | 122198 | 122198  | 1.7 |
|          | 308      | 308     | 22.8    | 22.8     | 6507   | 6507    | 1.3 |
|          | 72       | 83      | 24.7    | 53.5 NA  | NA     |         | 1.1 |
| NA       |          | 44 NA   |         | 25.6 NA  |        | 383     | 2   |
|          | 131      | 131     | 3       | 3        | 1687   | 1687    | 0.9 |
| NA       |          | 984 NA  |         | 46.5 NA  |        | 1718    | 1.1 |
| NA       | NA       | NA      |         | 80.1 NA  | NA     |         | 1   |
|          | 274      | 217     | 253.7   | 63.4     | 2120   | 2120    | 1.1 |
|          | 722      | 650     | 129.1   | 139.8    | 1208   | 1208    | 3.1 |
|          | 1546     | 1546    | 9.5     | 9.5 NA   | NA     | NA      |     |
| NA       |          | 46 NA   |         | 20.5 NA  | NA     |         | 1.4 |
|          | 441      | 272     | 112.4   | 124.7    | 6502   | 6502    | 1.2 |
| NA       | NA       | NA      | NA      | NA       | NA     |         | 1.4 |
| NA       | > 1650.0 |         | 209.7   | 157.3 NA |        | 1329    | 1.4 |
|          | 551      | 568     | 183.5   | 168.1    | 616    | 558     | 1.3 |
| > 1650.0 | > 1650.0 |         | 183.4   | 183.4    | 1817   | 1817    | 1.3 |
|          | 255      | 255     | 43.9    | 25.5 NA  | NA     |         | 1.5 |
| NA       | NA       | NA      | NA      |          | 40447  | 40447   | 0.9 |
|          | 490      | 482 NA  |         | 169.2    | 29200  | 29200   | 1.3 |
|          | 894      | 1190    | 150.7   | 177.3    | 4836   | 4836    | 1.3 |
|          | 997      | 997     | 176.1   | 156      | 1263   | 1263    | 3   |
| > 1650.0 | > 1650.0 |         | 242.2   | 242.2    | 31627  | 31627   | 1.2 |
|          | 1414     | 1414    | 180.5   | 319.2    | 14714  | 33289   | 1.6 |
|          | 120      | 120 NA  |         | 19.6 NA  | NA     | TNP     |     |
| > 1650.0 | > 1650.0 | NA      |         | 109 NA   | NA     |         | 1.2 |
| NA       | NA       | NA      | NA      | NA       | NA     |         | 1   |
|          | 348      | 348     | 191 TNP |          | 613    | 613     | 1.1 |
|          | 260      | 260     | 158.7   | 158.7    | 5364   | 5364    | 1.3 |
| NA       |          | 627 NA  |         | 178.4    | 792    | 792     | 1.2 |

|          |          |        |       |          |       |       |     |
|----------|----------|--------|-------|----------|-------|-------|-----|
| > 1650.0 | > 1650.0 |        | 224.6 | 89.2     | 66288 | 66288 | 1.1 |
|          | 298      | 320 NA |       | 163.1    | 1346  | 1346  | 1.6 |
| NA       |          | 541 NA |       | 91.9 NA  | NA    |       | 1.1 |
| NA       |          | 224 NA |       | 45.2 NA  | NA    |       | 1.9 |
| NA       | > 1650.0 | NA     |       | 212.2 NA | NA    |       | 4.1 |
| NA       |          | 147 NA |       | 15.6 NA  | NA    |       | 1.3 |
| NA       |          | 110    | 4.1   | 5.6      | 1525  | 1525  | 1.2 |
| NA       | NA       |        | 143.4 | 143.4    | 2304  | 2304  | 1.1 |
| > 1650.0 | > 1650.0 |        | 193.3 | 191.9    | 520   | 574   | 1.4 |
| NA       |          | 574 NA |       | 286.4 NA | NA    |       | 1.3 |
|          | 392      | 367    | 73.6  | 27.1     | 798   | 448   | 1   |
| NA       | NA       | NA     |       | 85.5 NA  | NA    |       | 1.3 |
|          | 422      | 422    | 329.7 | 329.7    | 649   | 649   | 1.1 |
| NA       | NA       | NA     |       | 31.1     | 575   | 575   | 1.9 |
|          | 636      | 636    | 150.5 | 186.5    | 1096  | 1096  | 1.3 |
| NA       | NA       | NA     | NA    | NA       | NA    | NA    | 1.2 |
|          | 160      | 158    | 131   | 137.3    | 1708  | 1708  | 1   |
|          | 1237     | 1237   | 245.4 | 245.4    | 597   | 597   | 1.4 |
|          | 466      | 483    | 183.7 | 111.3    | 456   | 456   | 1.3 |
|          | 802      | 350    | 181.4 | 112.1    | 3949  | 3949  | 1.1 |
|          | 1048     | 1228   | 114.8 | 129.9    | 2134  | 2134  | 1   |
|          | 311      | 311 NA | NA    | NA       | NA    | NA    | 1   |
|          | 447      | 368    | 225.9 | 179.7    | 14152 | 14152 | 1.2 |
| NA       | NA       | NA     | NA    | NA       | NA    | NA    | 1.3 |
| NA       | NA       | NA     | NA    | NA       | NA    | NA    | NA  |
|          | 940      | 940 NA | NA    | NA       | NA    | NA    | 1.2 |
| > 1650.0 |          | 1005   | 388.4 | 386.2    | 32758 | 20954 | 1.3 |
|          | 1232     | 1003   | 179.1 | 199.4    | 2482  | 1991  | 1.2 |
| NA       | NA       | NA     |       | 123.3 NA | NA    |       | 1.3 |
|          | 317      | 359    | 30    | 27.8     | 1121  | 1121  | 1.1 |
|          | 308      | 340    | 123.3 | 164.9    | 338   | 338   | 1.2 |
|          | 592      | 592    | 153   | 114.7    | 721   | 721   | 1.1 |
| > 1650.0 | > 1650.0 |        | 36.9  | 32.7     | 639   | 639   | 1.1 |
| > 1650.0 | > 1650.0 |        | 153.2 | 154.6    | 1489  | 1536  | 1.2 |
|          | 373      | 373    | 49    | 160.5    | 5162  | 5162  | 1.1 |
| NA       | NA       | NA     | NA    | NA       | NA    | NA    | NA  |
|          | 963      | 963    | 6.6   | 6.6      | 1845  | 1845  | 0.9 |
|          | 860      | 957    | 182.5 | 80.1 NA  | NA    |       | 0.9 |
|          | 1067     | 1130   | 121.7 | 117.6 NA | NA    |       | 1.3 |
| NA       | NA       |        | 160   | 160      | 3994  | 3994  | 1   |
| > 1650.0 | > 1650.0 |        | 76.2  | 153.3    | 685   | 685   | 1.1 |
| NA       | NA       | NA     |       | 28.1 NA  | NA    |       | 1.1 |
| NA       | NA       | NA     |       | 26.5 NA  | NA    | NA    |     |
|          | 295      | 1163   | 85.5  | 27.8     | 301   | 301   | 1.1 |
| NA       | NA       | NA     |       | 76.6 NA  | NA    |       | 1   |

|          |           |       |          |       |         |     |
|----------|-----------|-------|----------|-------|---------|-----|
| 109685.7 | 109685.7  | 27.8  | 61.4     | 38099 | 38099   | 4.8 |
| 114      | 114       | 78    | 95.4     | 622   | 622     | 1.1 |
| NA       | 206 NA    |       | 8 NA     | NA    |         | 1.3 |
| NA       | NA        | NA    | NA       | NA    | NA      | 1.2 |
| NA       | NA        | NA    | > 156.0  | 8125  | 8125    | 1.2 |
| > 1650.0 | > 1650.0  | 113.8 | 108.4    | 960   | 960     | 1.1 |
| 936      | 936       | 90.6  | 90.6     | 1344  | 2000 NA |     |
| 183      | 220       | 133   | 141.5    | 1143  | 1923    | 1.1 |
| NA       | 1188 NA   |       | 11.3     | 894   | 894     | 1.3 |
| 1112     | 1185      | 146.1 | 104.5    | 19495 | 35206   | 1.2 |
| > 1650.0 | > 1650.0  | 151.8 | 151.8    | 337   | 337     | 1   |
| 307      | 307 NA    |       | 120.1    | 1156  | 1156    | 1.1 |
| NA       | 210 NA    |       | 22       | 3036  | 3036    | 1.7 |
| 601      | 601       | 122.7 | 122.7 NA | NA    | NA      |     |
| > 1650.0 | > 1650.0  | 140.3 | 92.8     | 803   | 803     | 1.3 |
| 100      | 97        | 135.6 | 6.5      | 3948  | 5575    | 1.3 |
| NA       | NA        | NA    | NA       | 49276 | 49276   | 1.2 |
| 1436     | 1139      | 251.8 | 288.1    | 33612 | 1003    | 1.1 |
| > 1650.0 | > 1650.0  | 198.1 | 198.1    | 713   | 713 NA  |     |
| 616      | 616       | 131.2 | 155.3 NA | NA    |         | 1.2 |
| 895      | 895       | 124.5 | 127.9 NA | NA    |         | 1.1 |
| 91       | 71        | 90    | 62.8     | 819   | 819     | 1.3 |
| 502      | 592       | 34    | 10.1 NA  | NA    |         | 1.2 |
| 1394     | 1394      | 153.6 | 206.5    | 5506  | 5506    | 1.1 |
| > 1650.0 | > 1650.0  | 36    | 57.3     | 436   | 605     | 1.1 |
| NA       | > 1650.0  | NA    | 219.1    | 782   | 782     | 1.2 |
| 812      | 358       | 238.4 | 230.6    | 1200  | 1200    | 1.3 |
| 341      | 341 NA    |       | 26.3     | 1367  | 1367    | 1.2 |
| 532      | 376 NA    |       | 164.9    | 1072  | 1072    | 1.2 |
| NA       | 9 NA      | NA    | NA       | NA    | NA      | 3.4 |
| 249      | 280 NA    |       | 111.9 NA | NA    | NA      | 1.1 |
| NA       | 648 NA    |       | 255.9    | 3636  | 3636    | 1.3 |
| 401      | 331       | 196.2 | 135.7    | 718   | 756 NA  |     |
| 401      | 331       | 196.2 | 135.7    | 718   | 756 NA  |     |
| NA       | 242 NA    |       | 45.9 NA  |       | 258     | 1.8 |
| NA       | 485       | 166.4 | 225.2    | 2133  | 2133    | 1.3 |
| > 1650.0 | 1132      | 333.4 | 384      | 17767 | 17767   | 1.2 |
| 957      | 1262      | 385.5 | 309.8    | 49380 | 49380   | 1.2 |
| > 1650.0 | > 1650.0  | 164.7 | 210.5    | 432   | 712     | 1.2 |
| NA       | 178 NA    |       | 24.2 NA  | NA    |         | 2.1 |
| 741      | 741       | 83.8  | 83.8     | 1700  | 1700 NA |     |
| NA       | 3921.1 NA |       | 47       | 5333  | 5333    | 1.4 |
| 499      | 499       | 145.7 | 145.7    | 1582  | 1582    | 1.2 |
| 1022     | 1022      | 117.7 | 201.2    | 1111  | 1111    | 1.1 |
| 1581     | 1422      | 95.2  | 136.3    | 592   | 592     | 1.3 |

|          |          |          |       |          |       |         |     |
|----------|----------|----------|-------|----------|-------|---------|-----|
|          | 963      | 1279     | 74.2  | 59       | 258   | 258     | 1.2 |
| NA       |          | 219 NA   |       | 23.3 NA  | NA    |         | 1.1 |
| NA       |          | 298 NA   |       | 1.7 NA   | NA    |         | 1   |
|          | 1474     | 1576     | 223   | 156.3    | 1341  | 1341    | 1.4 |
|          | 472      | 415      | 27.2  | 1.7 NA   | NA    |         | 1   |
| NA       | NA       | NA       |       | 38.6 NA  | NA    |         | 1.2 |
| NA       | NA       | NA       |       | 120.7 NA | NA    |         | 1.3 |
| > 1650.0 | > 1650.0 |          | 232.8 | 156.6    | 1019  | 1019    | 1.3 |
| NA       |          | 194 NA   |       | 100.5 NA |       | 813     | 1.2 |
| NA       | NA       | NA       | NA    | NA       |       | 1611    | 1.1 |
| > 1650.0 | > 1650.0 |          | 61.9  | 61.9 NA  | NA    |         | 3.7 |
| > 1650.0 | > 1650.0 |          | 412.7 | 298.5    | 48223 | 48223   | 1.2 |
| > 1650.0 | > 1650.0 | NA       |       | 152.7    | 2266  | 2266    | 1.3 |
| NA       | NA       | NA       | NA    | NA       | NA    |         | 1.1 |
|          | 1013     | 1013     | 327.2 | 327.2    | 1056  | 1056    | 6.4 |
|          | 764      | 764      | 208.9 | 103.2    | 933   | 933     | 1.2 |
| NA       |          | 1322 NA  |       | 26.9     | 1133  | 1133    | 1.4 |
|          | 363      | 337      | 102.2 | 100.5    | 4184  | 550     | 6   |
|          | 1616     | > 1650.0 | 263.3 | 339.1    | 3569  | 3569    | 1.3 |
|          | 1068     | 1068     | 140.7 | 140.7    | 1144  | 1144 NA |     |
| NA       | NA       | NA       | NA    | NA       | NA    |         | 0.9 |
| NA       | NA       | NA       | NA    | NA       | NA    |         | 1.5 |
|          | 780      | 737      | 124.5 | 312.7    | 415   | 415     | 1.3 |
|          | 429      | 412      | 80.3  | 60.5     | 1012  | 1012    | 1.2 |
| > 1650.0 | > 1650.0 |          | 291.5 | 291.5 NA | NA    |         | 1.3 |
|          | 464      | 464      | 54.4  | 54.4     | 721   | 721     | 1.2 |
| NA       |          | 1186 NA  |       | 156.9 NA | NA    |         | 1.3 |
| NA       |          | 961 NA   |       | 276.2 NA |       | 1084    | 1.3 |
|          | 1334     | 1334 NA  |       | 151.4 NA | NA    |         | 2.9 |
|          | 485      | 485      | 246   | 194.9 NA | NA    |         | 1.4 |
|          | 984      | 935      | 263.9 | 148.7 NA | NA    |         | 1.2 |
| > 1650.0 | > 1650.0 |          | 140.4 | 153.9    | 1364  | 1364    | 1.2 |
|          | 183      | 183      | 15.3  | 15.3     | 2718  | 2718    | 1   |
| NA       | NA       | NA       | NA    | NA       | NA    |         | 0.9 |
| NA       | NA       | NA       | NA    | NA       | NA    | NA      |     |
| NA       | > 1650.0 | NA       |       | 57.1 NA  | NA    |         | 1.3 |
| NA       |          | 739      | 104.6 | 92.3     | 722   | 722     | 1.2 |
|          | 761      | 946      | 99.5  | 42.7 NA  | NA    |         | 1.3 |
|          | 406      | 426      | 97.5  | 88.9 NA  | NA    |         | 1.2 |
|          | 706      | 1012     | 46.4  | 128.4 NA |       | 545     | 1.3 |
|          | 415      | 418      | 240.2 | 209.4    | 9114  | 9114    | 1.4 |
| NA       | NA       | NA       | NA    | NA       |       | 920     | 1.2 |
| NA       | NA       | NA       |       | 63.8 NA  | NA    |         | 1.1 |
| NA       |          | 733 NA   |       | 57.1     | 4239  | 4239    | 1.2 |
|          | 1508     | 1508 NA  |       | 83.3     | 1838  | 1838    | 1   |

|          |          |      |       |       |       |       |     |
|----------|----------|------|-------|-------|-------|-------|-----|
| NA       |          | 339  | NA    | 28.8  | 736   | 736   | 1.2 |
|          | 307      | 302  | 85.4  | 80    | 567   | 567   | 1   |
| NA       |          | 863  | NA    | 215.5 | 63290 | 1408  | 7.5 |
|          | 1063     | 1036 | 51    | 46.9  | 27499 | 27499 | 3.9 |
| NA       | NA       | NA   | NA    |       | 1943  | 1943  | 1.2 |
| NA       |          | 95   | NA    | 32    | NA    |       | 1.2 |
|          | 309      | 462  | 132.1 | 123.9 | 2014  | 2014  | 1.1 |
|          | 406      | 364  | 150.4 | 165   | 1139  | 1139  | 1.3 |
|          | 1563     | 1463 | NA    | 197.7 | 4306  | 4306  | 1.1 |
| NA       |          | 80   | 1.7   | 3.5   | NA    | NA    | 1.1 |
|          | 243      | 243  | 67.9  | 67.9  | NA    | NA    | 0.9 |
| NA       | NA       | NA   |       | 125.5 | NA    | NA    | 1.2 |
| > 1650.0 | > 1650.0 |      | 303.6 | 130.7 | 6171  | 6171  | 1.4 |
| NA       | NA       | NA   | NA    | NA    | NA    |       | 1.2 |
| NA       | NA       | NA   |       | 110.2 | NA    | NA    | 1.2 |
| NA       |          | 1290 | NA    | 337.5 | NA    | NA    | 1.2 |
| NA       |          | 864  | NA    | 22.3  | NA    | 29564 | 1   |
| NA       |          | 75   | NA    | 61.3  | NA    | NA    | 2   |
|          | 324      | 291  | NA    | 34.1  | 592   | 592   | 1.2 |
| NA       |          | 819  | 142.7 | 235.8 | NA    | 4016  | 1.3 |
| NA       |          | 111  | NA    | 9.8   | NA    | 251   | 1.1 |
|          | 163      | 163  | 119   | 50.3  | 391   | 391   | 1   |
|          | 510      | 460  | 251.7 | 240.8 | NA    | 509   | 1.3 |
| NA       | NA       | NA   |       | 30.4  | NA    | NA    | 1.2 |
| NA       | NA       | NA   |       | 23.9  | NA    | NA    | 1.2 |
|          | 523      | 391  | 142   | 75.4  | NA    | 430   | 1.2 |
| NA       | NA       | NA   |       | 55.6  | NA    | NA    | NA  |
|          | 541      | 629  | 203.4 | 82.5  | 20405 | 20405 | 1.3 |
|          | 40       | 33   | 0.5   | 0.2   | NA    | NA    | 1.1 |
|          | 67       | 67   | NA    | 53.5  | 703   | 703   | 1.1 |
|          | 671      | 492  | 141.4 | 146.4 | 5172  | 5172  | 1.3 |
| NA       |          | 898  | 74.9  | 151.2 | 7043  | 7043  | 1.6 |
|          | 69       | 43   | 109.4 | 9.9   | 340   | 340   | 0.9 |
|          | 246      | 220  | 20    | 17.1  | NA    | NA    | 1.2 |
| > 1650.0 | > 1650.0 |      | 185.3 | 101.8 | 3872  | 2138  | 1.5 |
| > 1650.0 | > 1650.0 |      | 271.9 | 51.5  | NA    | NA    | NA  |
|          | 794      | 794  | 22.8  | 22.8  | 24916 | 24916 | 1.1 |
| NA       | NA       | NA   | NA    | NA    | NA    | NA    |     |
|          | 458      | 458  | 150.4 | 140.3 | 472   | 472   | 1.6 |
| NA       | > 1650.0 | NA   |       | 167.1 | NA    | 1310  | 1.3 |
|          | 136      | 136  | 71.7  | 114.8 | 694   | 694   | 2.2 |
|          | 470      | 529  | 48.8  | 71.5  | 1028  | 1028  | 1.1 |
|          | 102      | 87   | 101.4 | 121.1 | 2282  | 2282  | 0.9 |
| NA       | NA       |      | 57.7  | 57.7  | NA    | NA    | 2.2 |
|          | 445      | 520  | 69.9  | 138.8 | 463   | 463   | 1.3 |

|          |          |      |       |          |          |       |      |     |
|----------|----------|------|-------|----------|----------|-------|------|-----|
| NA       | NA       |      | 230.8 | 107.1    | NA       | NA    |      | 1   |
|          | 532      | 532  | 163.5 | 187.2    |          | 1114  | 1114 | 1.2 |
|          | 1497     | 1497 | 92.5  | 45.2     | NA       | NA    |      | 1.3 |
|          | 303      | 268  | 146.8 | 129.9    |          | 2416  | 2416 | 1.3 |
| NA       | NA       | NA   |       | 116.7    | NA       | NA    |      | 1.2 |
| NA       | NA       | NA   |       | 100.5    | NA       | NA    |      | 1.5 |
| NA       |          | 220  | 160.6 | 132.6    |          | 726   | 534  | 5.4 |
| NA       | NA       | NA   | NA    | NA       | NA       | NA    |      | 0.9 |
|          | 499      | 538  | 11.2  | 23.1     |          | 2069  | 2069 | 1.5 |
| NA       |          | 70   | NA    | 0.4      | NA       | NA    |      | 1   |
|          | 308      | 279  | 219.4 | 183.6    |          | 5161  | 5161 | 1.4 |
| NA       |          | 406  | NA    | 196.2    | NA       |       | 587  | NA  |
| NA       |          | 5    | NA    | NA       | NA       | NA    |      | 1.1 |
|          | 809      | 1119 | NA    | 44.4     | NA       | NA    |      | 1.1 |
| > 1650.0 | > 1650.0 | NA   | NA    | NA       | NA       | NA    |      | 1.3 |
| NA       | NA       | NA   |       | 27.4     | NA       | NA    |      | 1.2 |
| NA       |          | 376  | 413.9 | 354.6    |          | 3603  | 7187 | 1.5 |
|          | 229      | 298  | 79.9  | 168.3    |          | 1736  | 1404 | 1.4 |
|          | 100      | 92   | 32.3  | 88.6     | NA       | NA    |      | 1.2 |
|          | 201      | 201  | NA    | NA       | NA       | NA    |      | 1.2 |
|          | 842      | 467  | 114.9 | 126.1    |          | 1767  | 1261 | 1.2 |
| NA       | > 1650.0 | NA   |       | 227.5    | NA       | NA    |      | 1.6 |
| > 1650.0 | > 1650.0 |      | 231.1 | 231.1    |          | 610   | 610  | 1.4 |
| NA       | NA       | NA   | NA    | > 128000 | > 128000 |       |      | 1.3 |
|          | 398      | 352  | 19.3  | 23.6     |          | 3204  | 3204 | NA  |
| NA       | NA       | NA   | NA    | NA       | NA       | NA    | NA   |     |
|          | 593      | 852  | 46.2  | 142.5    | NA       | NA    |      | 1.4 |
|          | 195      | 154  | NA    | 109.4    |          | 1175  | 1175 | 1.2 |
| NA       | NA       | NA   |       | 154.7    | NA       |       | 4349 | 1.2 |
|          | 1008     | 1008 | 58.1  | 145.7    | NA       |       | 803  | 1.1 |
|          | 752      | 752  | NA    | 98.3     |          | 721   | 721  | 1.1 |
| > 1650.0 | > 1650.0 |      | 45.7  | 45.7     |          | 510   | 510  | 1.2 |
| NA       |          | 574  | NA    | 22.2     | NA       | NA    |      | 1.4 |
|          | 251      | 251  | 145.5 | 76.1     |          | 1166  | 2140 | 1.1 |
|          | 209      | 144  | 57    | 85.8     |          | 1834  | 1834 | 1.2 |
| NA       | NA       | NA   | NA    | NA       | NA       | NA    | NA   |     |
|          | 507      | 507  | 213.3 | 213.3    |          | 3439  | 3439 | 1   |
|          | 43       | 43   | NA    | 66       | < 215    | < 215 |      | 1.5 |
| NA       | NA       |      | 57.4  | 57.4     | NA       | NA    |      | 1.2 |
| NA       | NA       | NA   | NA    | NA       | NA       | NA    |      | 1.3 |
|          | 717      | 1076 | 127.9 | 108.2    |          | 1640  | 1640 | 1.1 |
| NA       |          | 1131 | NA    | 9.1      | NA       |       | 1822 | 1   |
| NA       |          | 780  | 75    | 74.6     |          | 476   | 366  | 1.1 |
| NA       | NA       | NA   |       | 12.1     | NA       | NA    |      | 1   |
|          | 607      | 613  | 249.2 | 212.8    |          | 776   | 776  | 1.2 |

|          |          |          |       |         |       |       |      |     |
|----------|----------|----------|-------|---------|-------|-------|------|-----|
|          | 320      | 320      | 95.5  | 100.2   | NA    | NA    |      | 1.2 |
|          | 248      | 248      | 218.3 | 161.7   |       | 465   | 465  | 1.3 |
|          | 246      | 246      | 84    | 28.7    | NA    | NA    |      | 1.1 |
|          | 493      | 659      | 106.1 | 78.4    |       | 530   | 530  | 1.1 |
|          | 128      | 112      | 152.6 | > 156.0 |       | 1011  | 1011 | 1.1 |
|          | 347      | 347      | NA    | 199.8   |       | 1044  | 1044 | 1.1 |
|          | 1628     | > 1650.0 | 37.9  | 20.2    | NA    |       | 1841 | 1.2 |
| NA       | NA       | NA       |       | 132.8   | NA    | NA    |      | 1.3 |
|          | 631      | 812      | 117.7 | 91.8    |       | 623   | 623  | 1.1 |
| > 1650.0 | > 1650.0 |          | 79.8  | 51.8    | 26115 | 26115 |      | 1.3 |
|          | 941      | 1272     | NA    | 136.9   |       | 737   | 737  | 1.1 |
| NA       |          | 680      | NA    | 50.1    |       | 864   | 864  | 1.1 |
|          | 441      | 408      | 122.3 | 173     |       | 1983  | 1983 | 1.1 |
| > 1650.0 |          | 978      | 150.6 | 50      |       | 910   | 843  | 1.2 |
|          | 96       | 109      | 13.5  | 12.3    |       | 5009  | 5009 | 1.1 |
|          | 1139     | 1139     | 139.8 | 139.8   |       | 685   | 685  | NA  |
| NA       |          | 655      | NA    | 99.6    | NA    | NA    |      | 2.8 |
| NA       |          | 756      | NA    | 25.5    |       | 598   | 598  | 8.1 |
| NA       |          | 1583     | NA    | 381.1   | NA    | NA    |      | 1.8 |
| NA       | NA       | NA       | NA    | NA      | NA    | NA    |      | 1.1 |
|          | 1336     | > 1650.0 | 284.7 | 166.5   |       | 1787  | 1787 | 1.1 |
| NA       | NA       | NA       | NA    | NA      | NA    | NA    |      | 1.2 |
| NA       | NA       | NA       | NA    | NA      | NA    | NA    |      | 1.2 |
|          | 1189     | 1022     | 285.1 | 316.3   |       | 7183  | 7609 | 1.5 |
|          | 1435     | 1325     | 95.9  | 100.6   |       | 1164  | 1405 | 1.1 |
| NA       | NA       | NA       |       | 32.4    |       | 562   | 562  | 1   |
|          | 1005     | 1254     | 42.6  | 72.2    |       | 3312  | 3312 | 1.3 |
|          | 479      | 576      | 40    | 32      |       | 325   | 325  | 1.1 |
| NA       | NA       | NA       | NA    | NA      | NA    | NA    |      | 1.2 |
| NA       | NA       | NA       |       | 257.1   | NA    | NA    |      | 1.3 |
|          | 88       | 146      | 18.2  | 80.8    |       | 598   | 598  | 3.2 |
|          | 293      | 293      | 19.3  | 19.3    |       | 775   | 775  | 1   |
|          | 123      | 126      | NA    | 0.7     |       | 770   | 869  | 1.1 |
|          | 1586     | 1586     | 68.8  | 68.8    |       | 6415  | 6415 | 1.2 |
|          | 465      | 410      | 202.1 | 140.4   |       | 1458  | 1458 | 1.4 |
|          | 969      | 690      | 150   | 145.3   |       | 5457  | 480  | 1.2 |
| NA       | NA       | NA       | NA    | NA      | NA    | NA    |      | 1.1 |
| > 1650.0 | > 1650.0 |          | 242.9 | 209.7   |       | 1897  | 1897 | 1.1 |
| > 1650.0 |          | 1620     | 136.8 | 151.2   |       | 799   | 940  | 0.9 |
| > 1650.0 | > 1650.0 |          | 309.1 | 121.4   |       | 463   | 463  | 1.1 |
|          | 639      | 639      | 240.9 | 146.2   |       | 7424  | 7424 | 1.2 |
|          | 586      | 586      | 126.2 | 164.8   |       | 2548  | 2548 | 1.2 |
|          | 404      | 372      | 202.2 | 207.5   |       | 1383  | 1383 | 1.2 |
|          | 57       | 46       | 248.1 | 264.1   |       | 2498  | 1397 | 1.2 |
|          | 510      | 535      | 72.3  | 44.8    | NA    | NA    |      | 2   |

|          |          |      |       |       |       |       |      |
|----------|----------|------|-------|-------|-------|-------|------|
|          | 790      | 790  | 206.2 | 96.3  | NA    | NA    | 1.3  |
| NA       | NA       | NA   | NA    | NA    | NA    | NA    | 1.2  |
|          | 672      | 672  | NA    | 69.7  | 696   | 696   | 1.1  |
| NA       |          | 702  | NA    | 126   | 1741  | 1741  | 1.1  |
|          | 1307     | 1307 | 237.1 | 43.5  | 1465  | 1465  | 1    |
|          | 299      | 200  | 103.4 | 74.8  | 977   | 670   | 1.2  |
|          | 52       | 23   | 172.8 | 136.3 | 2223  | 2223  | 1.2  |
|          | 114      | 114  | 90.6  | 90.6  | 2078  | 2078  | 1.1  |
|          | 981      | 531  | 146.3 | 47.8  | 18143 | 18143 | 1.3  |
| NA       | NA       | NA   | NA    | NA    | NA    | NA    | 2.1  |
|          | 153      | 153  | NA    | NA    | NA    | NA    | 1.1  |
|          | 198      | 230  | 50.5  | 57.4  | NA    | NA    | 1.2  |
|          | 370      | 519  | 90.4  | 153.5 | 2117  | 2117  | 1.1  |
| NA       |          | 388  | NA    | 133.9 | NA    | NA    | 1.1  |
|          | 881      | 1083 | 181.2 | 211.5 | 1867  | 1867  | 1.2  |
| > 1650.0 | > 1650.0 |      | 300.4 | 153   | 395   | 395   | 11.6 |
| NA       | NA       | NA   |       | 221.9 | 6238  | 6238  | 1.2  |
|          | 852      | 702  | 65.5  | 247.4 | NA    | 393   | 1.1  |
|          | 272      | 272  | 292.2 | 221.1 | 2267  | 2267  | 1.3  |
|          | 587      | 587  | 229   | 68.2  | 336   | 336   | 1.2  |
| NA       | NA       | NA   | NA    | NA    | NA    | NA    | 1.1  |
| > 1650.0 | > 1650.0 | NA   |       | 149.3 | 1807  | 1807  | 1.2  |
| NA       | NA       | NA   |       | 26.2  | NA    | NA    | 1.1  |
|          | 185      | 183  | 71.9  | 54.9  | 1143  | 1143  | 1.2  |
|          | 743      | 746  | 278.6 | 278.6 | 6440  | 6440  | 1.3  |
| > 1650.0 | > 1650.0 | NA   |       | 104.3 | 3883  | 3883  | 1.3  |
|          | 704      | 453  | 323.7 | 153.9 | 1489  | 1489  | 1.5  |
|          | 381      | 374  | 337.3 | 273.5 | 2313  | 3596  | 1.5  |
|          | 110      | 110  | 96.1  | 51.1  | NA    | NA    | 1.3  |
| > 1650.0 | > 1650.0 |      | 176.7 | 148   | 5121  | 5121  | 1.2  |
|          | 520      | 520  | 109.4 | 109.4 | 5788  | 5788  | 1.2  |
| NA       | NA       |      | 63.3  | 63.4  | NA    | NA    | 1.1  |
| NA       | TNP      | NA   |       | 166.3 | NA    | NA    | 3.7  |
|          | 256      | 299  | 22.6  | 19.7  | 92089 | 92089 | 1.3  |
| NA       |          | 1011 | NA    | 132.5 | NA    | NA    | 1.2  |
| NA       | NA       | NA   |       | 156   | 735   | 735   | 1.1  |
| NA       | NA       | NA   |       | 156   | 735   | 735   | 1.1  |
| NA       |          | 1543 | NA    | 73.2  | NA    | NA    | 1.1  |
| NA       | NA       | NA   | NA    | NA    | NA    | NA    | 2.3  |
| > 1650.0 | > 1650.0 |      | 71.8  | 61.7  | 1395  | 1395  | 1.2  |
|          | 24       | 24   | 146.4 | 87.8  | NA    | NA    | 1.1  |
|          | 791      | 1290 | NA    | 146.9 | 681   | 695   | 1.2  |
|          | 770      | 643  | 175.5 | 149.7 | 668   | 668   | 1.4  |
| NA       |          | 1425 | NA    | 223.9 | NA    | NA    | 1.8  |
|          | 816      | 816  | 91.7  | 91.7  | 288   | 288   | NA   |



|          |               |         |       |          |       |         |     |
|----------|---------------|---------|-------|----------|-------|---------|-----|
| > 1650.0 | > 1650.0      |         | 144.5 | 116.4    | 1025  | 1025    | 1.2 |
|          | 1356          | 1356 NA |       | 107 NA   | NA    |         | 1.2 |
|          | 2884          | 2884    | 141.9 | 155.8    | 1336  | 1336    | 1.2 |
| NA       | > 1650.0      | NA      |       | 48.6 NA  | NA    |         | 1.1 |
| NA       | NA            | NA      |       | 20.8 NA  | NA    |         | 1   |
| NA       | NA            |         | 138.3 | 78.9 NA  | NA    |         | 1.1 |
|          | 445           | 387     | 144.7 | 138.2    | 631   | 631     | 1.3 |
| NA       | NA            | NA      | NA    | NA       | NA    |         | 1.2 |
|          | 1558 > 1650.0 |         | 129.8 | 139      | 320   | 320     | 1.3 |
| > 1650.0 | > 1650.0      |         | 57.8  | 57.8     | 1569  | 1569 NA |     |
|          | 1301          | 1301 NA |       | 189.1    | 13514 | 975     | 1.3 |
|          | 667           | 667     | 21.5  | 21.5     | 3120  | 3120    | 1.1 |
| NA       | NA            | NA      | NA    | NA       | NA    | NA      |     |
|          | 219           | 222     | 108.5 | 138.8    | 776   | 776     | 2.7 |
| NA       |               | 156 NA  |       | 6.1 NA   |       | 11126   | 1.1 |
| NA       |               | 458 NA  |       | 94.7 NA  |       | 1416    | 1.9 |
| NA       |               | 78 NA   | NA    | NA       | NA    |         | 1.2 |
| > 1650.0 | > 1650.0      |         | 160.6 | 157.1    | 966   | 966     | 1.2 |
|          | 668           | 537     | 10.7  | 10.8 NA  |       | 16671   | 1.2 |
|          | 571           | 571     | 30.8  | 22.2     | 580   | 580     | 1.2 |
| NA       | NA            | NA      | NA    | NA       | NA    |         | 1.1 |
|          | 1126          | 1126 NA | NA    | NA       | 1747  | 1747 NA |     |
| > 1650.0 | > 1650.0      | NA      |       | 26.2 NA  | NA    |         | 1.2 |
|          | 766           | 766     | 71    | 73.1     | 624   | 624     | 1.2 |
|          | 127           | 127 NA  | NA    | NA       | NA    |         | 1.2 |
| NA       | NA            | NA      | NA    | NA       | NA    | NA      |     |
| > 1650.0 | > 1650.0      |         | 424.8 | 436.3    | 4397  | 4397    | 1.2 |
| > 1650.0 | > 1650.0      |         | 84.2  | 130.6    | 5709  | 5709    | 1.2 |
|          | 808           | 697 NA  |       | 143.8    | 1159  | 1159    | 1.2 |
| NA       |               | 668     | 130.4 | 97.3     | 1055  | 1055    | 1.4 |
|          | 757           | 757     | 31.5  | 32.4 NA  | NA    |         | 1.2 |
|          | 91            | 91 NA   |       | 7.4      | 1403  | 1403    | 1.2 |
| NA       |               | 217 NA  |       | 163.9    | 622   | 622     | 1.1 |
| > 1650.0 | > 1650.0      |         | 57.7  | 57.7 NA  | NA    | NA      |     |
| > 1650.0 | > 1650.0      |         | 337.7 | 197.6    | 343   | 343     | 1.3 |
|          | 215           | 215     | 111.6 | 111.6    | 2528  | 2528    | 1.1 |
|          | 1153          | 1153 NA |       | 220.1 NA |       | 494     | 1.2 |
|          | 750           | 576     | 212.1 | 179.3    | 381   | 435     | 1.2 |
|          | 476           | 524     | 65.6  | 48.2     | 420   | 420     | 1.2 |
|          | 3004          | 8053    | 213.7 | 428.4    | 742   | 742     | 1.6 |
| NA       | NA            | NA      | NA    | NA       | NA    |         | 1   |
| > 1650.0 | > 1650.0      |         | 360.9 | 207      | 8542  | 20730   | 1.2 |
|          | 898           | 898     | 89.7  | 35.2     | 544   | 544     | 1.6 |
|          | 447           | 621 NA  |       | 26.9 NA  | NA    |         | 1.2 |
|          | 507           | 507     | 151.6 | 151.6    | 16719 | 16719   | 1.3 |

|          |          |        |           |            |       |          |     |
|----------|----------|--------|-----------|------------|-------|----------|-----|
|          | 1595     | 274    | 111.1     | 62         | 11227 | 915      | 1.3 |
| NA       | NA       | NA     | NA        | NA         | NA    |          | 1.2 |
|          | 383      | 383    | 106.6     | 79.5       | 7392  | 7392     | 1.2 |
| > 1650.0 | > 1650.0 |        | 170.4     | 170.4      | 22357 | 22357 NA |     |
|          | 717      | 717 NA |           | 161.6      | 465   | 465      | 1.3 |
| NA       | > 1650.0 | NA     |           | 15.6 NA    | NA    |          | 1   |
| NA       |          | 463 NA |           | 77.6       | 379   | 379      | 1.1 |
| > 1650.0 | > 1650.0 |        | 157.2     | 140.3      | 642   | 414      | 1.3 |
| NA       | > 1650.0 |        | 75.8      | 137.2      | 314   | 314      | 1.4 |
|          | 126      | 126 NA |           | 29.2 NA    | NA    | NA       |     |
| > 1650.0 | > 1650.0 |        | 296.6 TNP |            | 1722  | 1722     | 1.1 |
| NA       | NA       | NA     |           | 3.3 NA     | NA    |          | 1.3 |
| NA       |          | 581 NA |           | 40.5 NA    |       | 694      | 1.3 |
| NA       |          | 134    | 117.2     | 146.5 NA   |       | 240      | 1.2 |
| NA       | NA       | NA     | NA        | NA         | NA    | NA       |     |
| > 1650.0 | > 1650.0 |        | 65.8      | 48.2       | 74072 | 74072    | 1.2 |
| NA       |          | 620    | 84        | 79.5       | 3926  | 3926     | 1.2 |
| NA       | NA       | NA     | NA        | NA         | NA    |          | 1.5 |
|          | 1444     | 1444   | 46.3      | 46.3       | 1971  | 1971     | 1.2 |
|          | 484      | 484    | 202.3     | 202.3 NA   | NA    |          | 1.2 |
| NA       | NA       | NA     | NA        | NA         | NA    |          | 1.2 |
|          | 323      | 323 NA | NA        | NA         | NA    | NA       |     |
|          | 1219     | 1219   | 48.4      | 88 NA      | NA    |          | 1.2 |
| NA       | NA       | NA     | NA        | NA         | NA    | NA       |     |
| > 1650.0 | > 1650.0 |        | 74.4      | 38         | 1649  | 1649     | 1.1 |
|          | 1548     | 1529   | 155.4     | 142.9      | 540   | 540      | 1.1 |
| NA       | NA       | NA     |           | 18.2 NA    | NA    |          | 1   |
|          | 957      | 998    | 145.2     | 100.1      | 241   | 241      | 1.1 |
|          | 1014     | 1014   | 62.5      | 62.5       | 4249  | 4249     | 1   |
| NA       |          | 276 NA |           | 213.3 NA   | NA    |          | 1.2 |
| NA       | NA       | NA     |           | 142.9      | 5299  | 5299     | 1.1 |
| NA       |          | 576 NA |           | 153.4 NA   | NA    |          | 2.6 |
|          | 27       | 27     | 15.8      | 15.8 < 215 | < 215 | NA       |     |
| NA       | NA       | NA     | NA        | NA         | NA    | NA       |     |
| > 1650.0 | > 1650.0 |        | 149.2     | 137.4      | 5326  | 5326     | 1.2 |
| NA       | NA       |        | 1.5       | 1.5        | 956   | 956      | 1   |
| > 1650.0 |          | 1623   | 102.8     | 128.9 NA   | NA    |          | 1.1 |
| NA       | NA       | NA     |           | 86 NA      |       | 4676     | 1.1 |
|          | 734      | 806    | 29.1      | 108.3      | 31461 | 31461    | 1.7 |
| NA       | NA       | NA     |           | 198.4 NA   | NA    |          | 1.4 |
| NA       |          | 359    | 94.6      | 94.1 NA    | NA    |          | 1.3 |
|          | 124      | 124 NA |           | 85.8 NA    | NA    |          | 2   |
| NA       |          | 973    | 199       | 100.6      | 75875 | 75875    | 1.3 |
|          | 541      | 541    | 37.1      | 37.1       | 913   | 913      | 1.1 |
|          | 480      | 554    | 155.4     | 40         | 2303  | 2303     | 2.7 |

|          |          |      |       |       |       |        |     |
|----------|----------|------|-------|-------|-------|--------|-----|
|          | 894      | 894  | 200.4 | 207.6 | NA    | NA     | 1.4 |
| > 1650.0 | > 1650.0 |      | 144.7 | 115.4 | 54346 | 100097 | 1.3 |
|          | 33       | 37   | NA    | 9.7   | 632   | 632    | 1.1 |
|          | 770      | 770  | NA    | 90.5  | < 215 | < 215  | 1.2 |
| NA       | NA       | NA   |       | 44.2  | NA    | NA     | 1.2 |
| NA       | NA       | NA   | NA    | NA    | NA    | NA     |     |
|          | 327      | 327  | NA    | 155.8 | NA    | NA     | 1.4 |
|          | 1176     | 994  | 404.2 | 400.2 | 553   | 553    | 1.4 |
| NA       | > 1650.0 | NA   |       | 223.9 | NA    | NA     | 1.1 |
|          | 116      | 116  | 25.4  | 25.4  | 928   | 928    | 1.5 |
| > 1650.0 | > 1650.0 |      | 57.6  | 57.6  | NA    | NA     |     |
| NA       | NA       |      | 149.5 | 42.4  | 997   | 997    | 1.2 |
| NA       | NA       | NA   | NA    | NA    | NA    |        | 1   |
| NA       |          | 246  | NA    | 45.1  | NA    | 2121   | 1.2 |
| NA       | > 1650.0 |      | 119.3 | 121.4 | 1448  | 1234   | 1   |
| NA       | NA       | NA   | NA    | NA    | NA    |        | 1.1 |
|          | 620      | 620  | 182.9 | 101.9 | NA    | NA     | 1.2 |
| NA       | NA       | NA   |       | 39.6  | NA    | NA     |     |
|          | 286      | 286  | NA    | 141.3 | 1504  | 1504   | 1.1 |
|          | 896      | 896  | NA    | 39.8  | NA    | NA     | 1.2 |
| NA       |          | 443  | NA    | 145.1 | NA    | NA     | 7.1 |
| > 1650.0 | > 1650.0 |      | 187.6 | 201.4 | 1358  | 1358   | 1.2 |
|          | 300      | 286  | 46.1  | 42.1  | 388   | 388    | 1.1 |
|          | 657      | 657  | 123.1 | 57.7  | 375   | 375    | 1.1 |
|          | 896      | 1062 | 49.9  | 56.3  | 241   | 241    | 1.9 |
| NA       |          | 439  | NA    | 10.5  | NA    | 2155   | 1.2 |
|          | 327      | 365  | NA    | 19    | NA    | 352    | 1.6 |
| NA       | NA       | NA   | NA    | NA    | NA    | NA     | 0.9 |
| NA       |          | 448  | 70    | 50.5  | NA    | NA     | 1.1 |
| NA       | NA       | NA   | NA    | NA    | NA    | NA     |     |
|          | 218      | 218  | 0.3   | 0.3   | NA    | NA     | 1   |
| > 1650.0 | > 1650.0 |      | 157.8 | 157.8 | 1806  | 1806   | 1.3 |
| NA       | NA       | NA   | NA    | NA    | NA    | NA     |     |
| NA       |          | 478  | NA    | 99.8  | 538   | 538    | 1.8 |
|          | 340      | 340  | 140.3 | 148.9 | NA    | NA     | 1.3 |
|          | 893      | 893  | 139.4 | 187.9 | 635   | 635    | 1.3 |
|          | 768      | 1045 | 115.9 | 150.3 | 595   | 595    | 1.1 |
| > 1650.0 | > 1650.0 |      | 144.7 | 184   | NA    | NA     | 1.1 |
|          | 158      | 130  | 133   | 87.3  | NA    | NA     | 1.1 |
|          | 1451     | 1451 | 44.4  | 44.4  | NA    | NA     |     |
| > 1650.0 |          | 1413 | 145   | 119.2 | 875   | 875    | 1   |
|          | 667      | 433  | 156   | 111.3 | 1223  | 930    | 1   |
|          | 692      | 469  | 18.5  | 12.5  | 1308  | 1308   | 1.6 |
| NA       | NA       | NA   |       | 245.3 | NA    | NA     | 5.3 |
|          | 50       | 50   | 66.2  | 66.2  | 336   | 446    | 1.2 |



|          |          |          |       |          |       |         |     |
|----------|----------|----------|-------|----------|-------|---------|-----|
| NA       | NA       | NA       | NA    | NA       | NA    | NA      | NA  |
|          | 224      | 232      | 164.8 | 153.2    | 45395 | 80386   | 1.4 |
|          | 859      | 932      | 135.1 | 138.9    | 2301  | 2301    | 1   |
|          | 465      | 465 NA   |       | 121 NA   | NA    |         | 1.1 |
|          | 563      | 787      | 148   | 188.6    | 2742  | 2742    | 1.2 |
| NA       |          | 412      | 142.1 | 86.2 NA  |       | 1586    | 1.1 |
| > 1650.0 | > 1650.0 |          | 174   | 154.3    | 870   | 870     | 1.2 |
|          | 347      | 340      | 297.4 | 219.8    | 678   | 678     | 1.3 |
|          | 142      | 142 NA   |       | NA       | 1087  | 1087 NA |     |
| NA       |          | 520 NA   |       | 139 NA   | NA    |         | 1.5 |
| NA       | NA       | NA       |       | 41.8 NA  | NA    |         | 1.1 |
| NA       | NA       |          | 53.8  | 49.5 NA  | NA    |         | 1.1 |
| NA       | NA       | NA       |       | 130 NA   | NA    |         | 1.3 |
| NA       | NA       | NA       |       | 59.9 NA  | NA    |         | 1.3 |
| > 1650.0 | > 1650.0 |          | 186.8 | 245.5    | 5293  | 5293    | 1.5 |
|          | 693      | 889      | 70.3  | 79 NA    |       | 872     | 1.2 |
|          | 1103     | 1103     | 423.4 | 423.4    | 6345  | 6345 NA |     |
|          | 210      | 180      | 76    | 38.9     | 1027  | 1027    | 1.3 |
|          | 259      | 259      | 47.2  | 47.2 NA  | NA    |         | 1.1 |
|          | 436      | 458      | 313.3 | 161.8    | 30736 | 33621   | 1.2 |
| > 1650.0 | > 1650.0 |          | 463.5 | 129.4    | 87837 | 87837   | 1.1 |
| > 1650.0 | > 1650.0 |          | 132.5 | 116.8    | 610   | 610     | 1.5 |
|          | 166      | 166      | 104.6 | 26.2     | 1542  | 1542    | 1.2 |
| NA       | NA       | NA       | NA    | NA       | NA    |         | 1.2 |
|          | 1032     | > 1650.0 | 159   | 323.5 NA | NA    |         | 1.1 |
| NA       | NA       | NA       |       | 138.4 NA | NA    |         | 1   |
| > 1650.0 |          | 1532     | 294.9 | 208.4    | 2208  | 2208    | 1.2 |
| NA       | NA       | NA       |       | 109.8    | 2817  | 2817    | 1.5 |
|          | 937      | 937      | 131   | 118.9    | 594   | 986     | 1.3 |
| NA       | NA       | NA       |       | 255.7    | 6595  | 6595    | 1.3 |
| > 1650.0 | > 1650.0 |          | 216   | 216      | 1441  | 1441    | 1.2 |
|          | 210      | 265 NA   |       | 155.5 NA | NA    |         | 6   |
| NA       |          | 362      | 36.9  | 150.1 NA |       | 1270    | 1.3 |
| NA       |          | 290 NA   |       | 76 NA    | NA    |         | 1.5 |
| > 1650.0 |          | 1953     | 109.7 | 80.6     | 376   | 376     | 1.2 |
|          | 847      | 847      | 340.7 | 340.7    | 603   | 603     | 1.2 |
|          | 602      | 312      | 134.9 | 136.2    | 799   | 799     | 1.1 |
| NA       |          | 66 NA    |       | 25.7 NA  |       | 683     | 1.1 |
|          | 340      | 151      | 172.5 | 91.7 NA  |       | 685     | 1.1 |
|          | 255      | 255 NA   |       | 241.6 NA | NA    |         | 1.3 |
|          | 324      | 223      | 200.4 | 222.5    | 7441  | 7441    | 1.2 |
| NA       | NA       | NA       | NA    | NA       | NA    | NA      |     |
|          | 515      | 515      | 123.3 | 84.5 NA  | NA    | NA      |     |
|          | 60       | 60       | 17.3  | 17.3     | 921   | 921     | 1.7 |
| > 1650.0 | > 1650.0 |          | 150.7 | 67.5     | 1035  | 1035    | 1.6 |

|          |          |      |    |       |       |           |        |     |
|----------|----------|------|----|-------|-------|-----------|--------|-----|
|          | 105      | 105  | NA |       | 120.5 | NA        | NA     | 1.1 |
| NA       | NA       | NA   | NA | NA    | NA    | NA        | NA     | 1.2 |
|          | 229      | 243  |    | 21.3  | 26.6  | 1577      | 1964   | 1.1 |
| > 1650.0 | > 1650.0 |      |    | 25.1  | 25.1  | 379 < 215 |        | 1   |
|          | 1612     | 645  |    | 324.7 | 277.7 | 1794      | 1794   | 1.4 |
| NA       | NA       | NA   | NA | NA    | NA    | NA        | NA     | 1.2 |
|          | 228      | 228  | NA |       | 152   | 2338      | 2338   | 1   |
|          | 585      | 367  |    | 340.3 | 222   | NA        | NA     | 1.2 |
| NA       |          | 432  | NA |       | 134   | NA        | NA     | 1.4 |
| NA       | NA       | NA   | NA | NA    | NA    | NA        | NA     | 2   |
| > 1650.0 | > 1650.0 |      |    | 238.6 | 295.6 | 6521      | 118892 | 1.4 |
|          | 96       | 76   |    | 266.2 | 339   | 967       | 945    | 1.3 |
|          | 313      | 313  | NA |       | 17.4  | NA        | NA     | 1.1 |
| NA       | NA       | NA   | NA | NA    | NA    | NA        | NA     | 1.1 |
| NA       | > 1650.0 | NA   |    |       | 150.3 | 563       | 563    | 1.3 |
|          | 1278     | 1278 |    | 215.5 | 215.5 | NA        | 493    | 1.2 |
| NA       | NA       | NA   |    |       | 3.4   | 824       | 824    | 1.2 |
|          | 719      | 1079 |    | 152.4 | 92.6  | 3610      | 3610   | 1.3 |
| NA       |          | 290  | NA |       | 113.2 | NA        | NA     | 1.3 |
|          | 1066     | 724  |    | 61.5  | 13.5  | NA        | NA     | 1.2 |
| > 1650.0 | > 1650.0 |      |    | 145.9 | 249.5 | 1399      | 1292   | 1.3 |
| NA       | NA       | NA   |    |       | 61.6  | NA        | NA     | 1.2 |
| NA       |          | 300  | NA |       | 204.6 | NA        | NA     | 1.4 |
| > 1650.0 | > 1650.0 |      |    | 131.9 | 223.2 | 1203      | 1203   | 1.5 |
| > 1650.0 | > 1650.0 | NA   |    |       | 196.2 | 851       | 851    | 1.4 |
|          | 658      | 698  |    | 248.6 | 229.2 | 1732      | 1732   | 1.6 |
|          | 952      | 952  |    | 142   | 142   | 2121      | 2121   | 1   |
| NA       |          | 1181 | NA |       | 119.3 | NA        | NA     | 1.2 |
|          | 181      | 181  |    | 8.5   | 9.8   | NA        | NA     | 1   |
|          | 181      | 181  |    | 8.5   | 9.8   | NA        | NA     | 1   |
| NA       | NA       |      |    | 55.4  | 55.4  | NA        | NA     | NA  |
|          | 211      | 285  |    | 19.5  | 86.4  | 880       | 880    | 1.1 |
| NA       |          | 318  | NA |       | 9     | NA        | NA     | 1.1 |
| > 1650.0 | > 1650.0 |      |    | 140   | 66.8  | 56631     | 56631  | 1.1 |
|          | 627      | 1246 |    | 63.6  | 175.2 | 841       | 841    | 1.3 |
| NA       |          | 1135 |    | 417.8 | 420.6 | 847       | 847    | 1.4 |
| NA       |          | 660  | NA |       | 109.4 | 741       | 741    | 1.2 |
| NA       | NA       | NA   | NA | NA    | NA    | NA        | NA     | 1   |
|          | 164      | 164  | NA |       | 20    | NA        | NA     | 1.2 |
|          | 199      | 274  |    | 73.7  | 90.2  | 427       | 427    | NA  |
|          | 1338     | 1338 |    | 22.6  | 236.8 | 1429      | 1429   | 1.4 |
| NA       | NA       | NA   | NA | NA    | NA    | NA        | NA     | 1   |
|          | 1496     | 1590 |    | 46.6  | 34.9  | NA        | NA     | NA  |
| NA       | NA       | NA   | NA | NA    |       | 527       | 527    | NA  |
| > 1650.0 |          | 1561 |    | 13.7  | 323.6 | 800       | 469    | 1.3 |

|          |          |          |       |       |        |        |     |
|----------|----------|----------|-------|-------|--------|--------|-----|
| NA       | NA       |          | 98.1  | 68.2  | NA     | NA     | 1.2 |
| NA       | NA       | NA       | NA    | NA    | NA     | NA     | 1   |
|          | 1264     | 1047     | 359.3 | 307.1 | 1116   | 1116   | 1.4 |
|          | 974      | 974      | 255.8 | 212.3 | NA     | NA     | 1.1 |
| NA       |          | 1420     | 347.2 | 286.9 | 121497 | 121497 | 1.2 |
|          | 123      | 123      | 292.1 | 292.1 | 1816   | 1816   | 1.2 |
| NA       |          | 29       | NA    | 25.1  | NA     | NA     | 2.8 |
|          | 425      | 425      | 13.5  | 13.5  | 1234   | 1234   | NA  |
| NA       |          | 179      | NA    | 7.3   | NA     | 373    | 1   |
|          | 450      | 404      | NA    | TNP   | 455    | 455    | 1.6 |
| NA       | NA       | NA       |       | 41.5  | NA     | NA     | 1.2 |
|          | 1480     | 1480     | 73.7  | 107.3 | 601    | 601    | 1.1 |
|          | 447      | 447      | 73    | 73    | 1469   | 1469   | 1.1 |
| NA       | NA       |          | 194   | 194   | 5987   | 5987   | 1.3 |
| NA       | NA       | NA       |       | 15.8  | NA     | NA     | 1.1 |
|          | 474      | 297      | 238.1 | 115   | 1310   | 1310   | 1.4 |
|          | 781      | 1005     | 151.4 | 134.4 | 17873  | 17873  | 1.1 |
| NA       | NA       | NA       | NA    | NA    | NA     | NA     |     |
| NA       |          | 797      | NA    | 252.4 | 17416  | 17416  | 1.7 |
| NA       | NA       | NA       | NA    | NA    | NA     | NA     | 1   |
| NA       | NA       |          | 71    | 71    | NA     | NA     | 1.1 |
|          | 172      | 148      | 125.1 | 119.9 | 1599   | 1599   | 1.3 |
|          | 1015     | 1309     | 15.7  | 28.4  | NA     | 54576  | 1.2 |
|          | 912      | 912      | 103.4 | 103.4 | 2139   | 2139   | 1   |
|          | 1391     | 1391     | 290.8 | 93    | NA     | NA     | 1   |
| NA       | NA       | NA       |       | 168.7 | NA     | NA     | NA  |
| > 1650.0 | > 1650.0 |          | 260.6 | 62.3  | 5118   | 5118   | 1.1 |
| NA       |          | 204      | 66.7  | 59.5  | 1264   | 1264   | 1   |
| NA       |          | 278      | NA    | 253.2 | NA     | 1838   | 1.5 |
| NA       | NA       |          | 264.2 | 238   | 1626   | 1278   | 1.2 |
| NA       | NA       | NA       | NA    | NA    | NA     | NA     |     |
| > 1650.0 | > 1650.0 |          | 203.4 | 212.2 | 1257   | 1257   | 1.1 |
|          | 567      | 605      | 134.1 | 73.6  | 864    | 991    | 1.1 |
|          | 97       | 89       | 159.5 | 141.9 | 2188   | 2188   | 1.2 |
| NA       | NA       | NA       | NA    | NA    | NA     | NA     |     |
| NA       |          | 1070     | NA    | 82.4  | 14566  | 14566  | 1.3 |
|          | 453      | 278      | 262.9 | 142.7 | 516    | 516    | 1.5 |
| NA       | NA       |          | 179.4 | 179.4 | NA     | NA     | 1.1 |
| NA       |          | 1073     | NA    | 169.4 | NA     | NA     | 1.6 |
|          | 575      | 767      | 91.1  | 115   | 1373   | 1373   | 1.3 |
| NA       | > 1650.0 | NA       |       | 69.7  | NA     | NA     | 1.3 |
| > 1650.0 | > 1650.0 |          | 137.2 | 135.3 | NA     | NA     | 1.3 |
|          | 581      | 581      | 37    | 24.2  | 236    | 236    | NA  |
|          | 1294     | > 1650.0 | 139.4 | 418   | 4889   | 4889   | 1.9 |
|          | 578      | 650      | 58.8  | 136.6 | 870    | 817    | 1.4 |

|          |          |          |       |         |       |        |          |    |     |
|----------|----------|----------|-------|---------|-------|--------|----------|----|-----|
| NA       |          | 1028     | NA    |         | 89.2  | NA     | NA       |    | 1.3 |
| > 1650.0 | > 1650.0 |          | 288.4 |         | 345.8 | 125687 | > 128000 |    | 1.7 |
|          | 880      | 1638     | 31.1  |         | 73.9  | NA     | NA       |    | 1.2 |
|          | 575      | 767      | 91.1  |         | 115   | 1373   | 1373     |    | 1.3 |
| NA       |          | 130      | NA    |         | 94.1  | NA     | NA       |    | 1.3 |
|          | 182      | 192      | 97.2  |         | 112   | 1379   | 1379     |    | 1   |
|          | 751      | 751      | NA    |         | 36.2  | NA     | NA       |    | 1.1 |
|          | 1189     | > 1650.0 |       | 93.5    | 56.5  | 3890   | 3890     |    | 1.1 |
| > 1650.0 | > 1650.0 | NA       |       |         | 74.8  | 50122  | 50122    |    | 1.5 |
| NA       |          | 863      | NA    |         | 47.2  | NA     | NA       |    | 1.3 |
| NA       |          | 863      | NA    |         | 47.2  | NA     | NA       |    | 1.3 |
| NA       | NA       | NA       |       | NA      | NA    | NA     | NA       | NA |     |
| > 1650.0 | > 1650.0 |          | 155.3 | > 156.0 |       | 943    | 943      |    | 1.4 |
|          | 1423     | 1570     | 147.6 |         | 136.2 | 364    | 389      |    | 1.4 |
| NA       | NA       | NA       |       | NA      | NA    | NA     | NA       |    | 1.4 |
|          | 1628     | 1628     | 197.6 |         | 197.6 | 106000 | 106000   |    | 1   |
|          | 1457     | 1457     | 132.3 |         | 132.3 | 4647   | 4647     |    | 1.1 |
| NA       |          | 734      | NA    |         | 141.8 | 6694   | 6694     |    | 1.1 |
| NA       |          | 584      | 413.6 |         | 163   | NA     | NA       |    | 1.3 |
| NA       |          | 844      | NA    |         | 75.8  | NA     | NA       |    | 1.3 |
|          | 375      | 375      | 80.1  |         | 80.1  | NA     | NA       |    | 1.1 |
| > 1650.0 | > 1650.0 |          | 197.9 |         | 197.9 | 2101   | 2101     |    | 1.4 |
| > 1650.0 | > 1650.0 |          | 442.9 |         | 442.9 | 4717   | 4717     |    | 1.4 |
| NA       |          | 172      | NA    |         | 0.2   | NA     | NA       |    | 1.1 |
|          | 152      | 152      | 33.4  |         | 33.4  | NA     | NA       |    | 1   |
|          | 311      | 294      | 148.8 |         | 146.8 | 3468   | 3468     |    | 1.1 |
|          | 590      | 593      | 169.7 |         | 119.6 | 473    | 406      |    | 1.2 |
| NA       | NA       | NA       |       |         | 64.6  | NA     | 1092     |    | 1.3 |
|          | 1233     | 904      | 91.8  |         | 35.4  | 1220   | 1220     |    | 1.1 |
| NA       |          | 1399     | NA    |         | 160.9 | NA     | NA       |    | 1.6 |
|          | 158      | 158      | 20.1  |         | 20.1  | NA     | NA       | NA |     |
| NA       |          | > 1650.0 | NA    |         | 31.3  | NA     | 3807     |    | 1.2 |
| NA       | NA       | NA       |       |         | 193.1 | NA     | NA       |    | 1.1 |
|          | 279      | 279      | 49    |         | 49    | 1775   | 1775     |    | 1.2 |
|          | 92       | 77       | 36    |         | 30.8  | 1411   | 1411     |    | 1   |
|          | 1392     | 1205     | 69    |         | 70.2  | 418    | 418      |    | 2.1 |
| NA       | NA       | NA       |       | NA      | NA    | NA     | NA       | NA |     |
|          | 98       | 98       | NA    |         | 16.5  | NA     | NA       |    | 1   |
|          | 1866     | 1866     | 353.2 |         | 290.6 | 557    | 557      |    | 1   |
|          | 906      | 955      | 149.3 |         | 133.2 | 2140   | 2140     |    | 1.2 |
|          | 1222     | 1222     | 11.9  |         | 142.6 | 24911  | 24911    |    | 1.2 |
| NA       | NA       |          | 280   |         | 250.7 | 2330   | 2330     |    | 1.2 |
| NA       | NA       | NA       |       | NA      | NA    | NA     | NA       |    | 1.2 |
| NA       |          | > 1650.0 | NA    |         | 144.3 | 1081   | 1081     |    | 1.2 |
|          | 885      | 940      | 75.7  |         | 35    | NA     | NA       |    | 1.1 |





|          |          |      |       |       |          |          |     |
|----------|----------|------|-------|-------|----------|----------|-----|
|          | 219      | 211  | 190.4 | 136.6 | 445      | 445      | 1.1 |
| NA       | NA       | NA   | NA    | NA    | NA       |          | 1.2 |
| NA       | NA       | NA   | NA    | NA    | NA       |          | 1.6 |
| NA       | NA       | NA   | NA    | NA    | NA       |          | 1.1 |
| NA       |          | 696  | NA    | 116   | NA       | NA       | 1.1 |
| NA       | NA       | NA   |       | 56.4  | 429      | 429      | 1.2 |
| > 1650.0 | > 1650.0 |      | 59.1  | 134.7 | 523      | 523      | NA  |
| NA       | NA       | NA   |       | 362.6 | 7454     | 7454     | 1.2 |
| > 1650.0 | > 1650.0 |      | 42.4  | 42.4  | 472      | 472      | 1.3 |
|          | 718      | 322  | 260.8 | 119.7 | 2067     | 2067     | 1.4 |
|          | 1099     | 1099 | 219.7 | 205.7 | 648      | 648      | 1.1 |
|          | 580      | 838  | 251.7 | 136.9 | 1092     | 1092     | 1.3 |
| > 1650.0 |          | 881  | 364   | 161.8 | 5775     | 1642     | 1.3 |
|          | 304      | 304  | 32.5  | 32.5  | 1666     | 1666     | 1.3 |
|          | 362      | 374  | 46    | 53.1  | 1193     | 1193     | 1.2 |
| > 1650.0 | > 1650.0 |      | 249   | 195.3 | NA       | NA       | 1.2 |
|          | 23       | 23   | 39.2  | 39.2  | 2615     | 2615     | 1.8 |
|          | 609      | 609  | NA    | 77.2  | 1056     | 1056     | 1.2 |
| NA       | NA       | NA   | NA    |       | 392      | 392      | 1   |
| NA       |          | 606  | NA    | 245.3 | NA       | NA       | 2   |
| > 1650.0 | > 1650.0 |      | 201.7 | 234.8 | 676      | 676      | 3.7 |
|          | 417      | 417  | NA    | 4.5   | NA       | NA       | 1.2 |
| NA       |          | 60   | NA    | 10.9  | NA       | 1878     | 1.1 |
| NA       | NA       | NA   |       | 144.6 | NA       | NA       | 1.5 |
| NA       | NA       | NA   | NA    | NA    | NA       | NA       | 1.3 |
| NA       | NA       | NA   | NA    | NA    | NA       | NA       |     |
|          | 1146     | 1146 | 271.5 | 170.4 | > 128000 | > 128000 | 1.2 |
|          | 457      | 1032 | 39.8  | 186.9 | 1025     | 1250     | 1.3 |
|          | 579      | 566  | 175.5 | 123   | 273      | 273      | 1.2 |
| > 1650.0 | > 1650.0 |      | 195.1 | 209.6 | 60922    | 60922    | 1.3 |
| > 1650.0 | > 1650.0 |      | 26.9  | 23.1  | 416      | 416      | 1.2 |
|          | 1005     | 1005 | 144.7 | 144.7 | 251      | 251      | NA  |
|          | 441      | 441  | 24.8  | 24.8  | 932      | 932      | 1   |
|          | 1425     | 1425 | 153.6 | 153.5 | 735      | 735      | 1.4 |
|          | 686      | 762  | 149.6 | 154.3 | 10468    | 10468    | 1.4 |
|          | 113      | 101  | 8.6   | 4.4   | 1957     | 1957     | 1.1 |
|          | 65       | 65   | NA    | NA    | NA       | NA       | 1.1 |
|          | 123      | 119  | 25.4  | 22.9  | 1742     | 3393     | 1.1 |
| NA       | NA       |      | 0.3   | 0.3   | 4659     | 4659     | 1.2 |
|          | 515      | 515  | NA    | 136.3 | NA       | NA       | 1.2 |
|          | 1076     | 1533 | 16.9  | 26.8  | 51202    | 51202    | 1.3 |
| NA       | NA       | NA   | NA    | NA    | NA       | NA       |     |
| NA       | NA       | NA   | NA    | NA    | NA       | NA       | 1.3 |
| > 1650.0 | > 1650.0 |      | 157.1 | 218.5 | NA       | NA       | 1.1 |
|          | 932      | 932  | 127.9 | 122.7 | 656      | 656      | 1.5 |

|          |          |          |       |       |        |        |     |
|----------|----------|----------|-------|-------|--------|--------|-----|
| NA       | NA       | NA       | NA    | NA    | NA     | NA     | 1.7 |
| > 1650.0 | > 1650.0 |          | 75.7  | 75.7  | 122249 | 122249 | 1.3 |
|          | 492      | 618      | 145.1 | 194.5 | 792    | 792    | 1.1 |
| > 1650.0 | > 1650.0 | NA       |       | 24.5  | NA     | NA     | 1   |
|          | 1208     | > 1650.0 | 117.9 | 153.8 | 241    | 241    | 1.3 |
| NA       | NA       |          | 196.6 | 116.8 | 75022  | 75022  | 1.2 |
| NA       | NA       | NA       |       | 0.9   | NA     | NA     | 1.1 |
|          | 371      | 371      | 259.8 | 259.8 | 3786   | 3786   | 1.3 |
| > 1650.0 |          | 1544     | 110.4 | 82.3  | 1856   | 1856   | 1.3 |
|          | 463      | 463      | NA    | 22.5  | 678    | 678    | 1.1 |
| NA       |          | 836      | NA    | 448.5 | NA     | 13058  | 1.5 |
|          | 443      | 387      | 32.1  | 20.9  | 1059   | 1059   | 1.2 |
| NA       |          | 450      | NA    | 16.7  | 664    | 664    | 1.3 |
|          | 559      | 559      | 44.9  | 35.3  | 597    | 597    | 1.4 |
|          | 1153     | 803      | 152.6 | 144.4 | 3456   | 3456   | 1.3 |
| NA       |          | 844      | NA    | 155.6 | NA     | NA     | 1.2 |
| NA       | > 1650.0 | NA       |       | 111.6 | 999    | 999    | 1   |
| NA       |          | 647      | NA    | 11.2  | NA     | NA     | 1.1 |
|          | 830      | 830      | NA    | NA    | 6685   | 6685   | 1.2 |
|          | 1451     | 1451     | 168   | 168   | 3715   | 3715   | 1.2 |
|          | 931      | 931      | 87.6  | 87.6  | NA     | NA     | 1.3 |
| NA       | NA       | NA       | NA    |       | 6232   | 6232   | 1.7 |
| NA       |          | 388      | NA    | 79.2  | NA     | NA     | 1.2 |
|          | 876      | 928      | 212.8 | 172.8 | 101787 | 101787 | 1.2 |
| NA       |          | 162      | 67    | 59.7  | NA     | NA     | 1.6 |
|          | 718      | 739      | 199.6 | 190.9 | 2300   | 2553   | 1.4 |
| NA       | NA       | NA       |       | 148.9 | NA     | NA     | NA  |
| NA       | NA       | NA       | NA    | NA    | NA     | NA     | NA  |
|          | 538      | 630      | 236.1 | 113.1 | NA     | NA     | 1.2 |
|          | 1070     | 1284     | 173.3 | 220.4 | 32870  | 32870  | 1.2 |
|          | 814      | 1334     | NA    | 148.6 | 1362   | 1410   | 1.4 |
| NA       | NA       | NA       | NA    |       | 1000   | 1000   | NA  |
| NA       |          | 354      | NA    | 57.3  | NA     | NA     | 1.3 |
| > 1650.0 | > 1650.0 |          | 179   | 179   | 1044   | 1044   | 1.2 |
|          | 341      | 391      | 128.1 | 141.1 | 57236  | 57236  | 1.1 |
| NA       | NA       |          | 6.4   | 6.4   | 359    | 359    | NA  |
|          | 648      | 166      | NA    | 144.9 | 1029   | 1029   | 1.1 |
| > 1650.0 | > 1650.0 |          | 375.4 | 138.3 | 821    | 821    | 1.3 |
|          | 178      | 323      | 27.3  | 147.2 | 754    | 754    | 1.2 |
|          | 530      | 736      | 22.9  | 13.1  | 1901   | 1901   | 1.1 |
|          | 417      | 667      | 110.6 | 76.1  | NA     | NA     | 1.7 |
| > 1650.0 | > 1650.0 |          | 210.3 | 153.1 | NA     | NA     | 1.1 |
|          | 541      | 541      | NA    | NA    | NA     | NA     | 1.2 |
|          | 125      | 125      | 20.4  | 20.4  | < 215  | < 215  | 1   |
|          | 165      | 165      | 128.5 | 128.5 | NA     | NA     | 1.2 |

|          |          |        |       |         |      |        |     |
|----------|----------|--------|-------|---------|------|--------|-----|
|          | 816      | 816    | 91.7  | 91.7    | 288  | 288 NA |     |
| NA       |          | 403 NA |       | 6.7 NA  |      | NA     | 1   |
|          | 947      | 947    | 4.6   | 4.6     | 705  | 705    | 1   |
|          | 128      | 69     | 148.4 | 67.8 NA |      | 1193   | 1.8 |
| > 1650.0 | > 1650.0 |        | 185.5 | 103.8   | 501  | 501    | 1.1 |
| > 1650.0 | > 1650.0 |        | 198.5 | 214.4   | 822  | 822    | 1.3 |
|          | 563      | 563    | 290.6 | 290.6   | 5984 | 5984   | 1.3 |





|    |    |        |       |    |     |    |   |
|----|----|--------|-------|----|-----|----|---|
| NA | NA | NA     | NA    | NA | NA  | NA |   |
| NA | NA | NA     | NA    | NA | NA  | NA |   |
| Y  | NA | NA     | NA    | NA | NA  | NA |   |
| NA | NA | NA     | NA    | NA | NA  | NA |   |
| NA | NA | NA     | NA    | NA | NA  | NA |   |
| NA | NA | NA     | NA    | NA | NA  | NA |   |
| NA | NA | NA     | NA    | NA | NA  | NA |   |
| NA | NA | NA     | NA    | NA | NA  | NA |   |
| NA | NA | NA     | NA    | NA | NA  | NA |   |
| Y  | NA | NA     | NA    | NA | NA  | NA |   |
| Y  | y  | 2.5 MG | DAILY |    | 2.5 | 2  | 5 |
| NA | NA | NA     | NA    | NA | NA  | NA |   |
| NA | NA | NA     | NA    | NA | NA  | NA |   |
| NA | NA | NA     | NA    | NA | NA  | NA |   |
| NA | NA | NA     | NA    | NA | NA  | NA |   |
| NA | NA | NA     | NA    | NA | NA  | NA |   |
| NA | NA | NA     | NA    | NA | NA  | NA |   |
| NA | NA | NA     | NA    | NA | NA  | NA |   |
| Y  | NA | NA     | NA    | NA | NA  | NA |   |
| NA | NA | NA     | NA    | NA | NA  | NA |   |
| NA | NA | NA     | NA    | NA | NA  | NA |   |
| NA | NA | NA     | NA    | NA | NA  | NA |   |
| Y  | NA | NA     | NA    | NA | NA  | NA |   |
| NA | NA | NA     | NA    | NA | NA  | NA |   |
| NA | NA | NA     | NA    | NA | NA  | NA |   |
| NA | NA | NA     | NA    | NA | NA  | NA |   |
| NA | NA | NA     | NA    | NA | NA  | NA |   |
| NA | NA | NA     | NA    | NA | NA  | NA |   |
| NA | NA | NA     | NA    | NA | NA  | NA |   |
| NA | NA | NA     | NA    | NA | NA  | NA |   |
| NA | NA | NA     | NA    | NA | NA  | NA |   |
| NA | NA | NA     | NA    | NA | NA  | NA |   |
| NA | NA | NA     | NA    | NA | NA  | NA |   |
| NA | NA | NA     | NA    | NA | NA  | NA |   |
| NA | NA | NA     | NA    | NA | NA  | NA |   |
| Y  | NA | NA     | NA    | NA | NA  | NA |   |
| NA | NA | NA     | NA    | NA | NA  | NA |   |
| NA | NA | NA     | NA    | NA | NA  | NA |   |





|    |    |        |     |    |    |    |     |
|----|----|--------|-----|----|----|----|-----|
| Y  | NA | NA     | NA  | NA | NA | NA |     |
| Y  | NA | NA     | NA  | NA | NA | NA |     |
| NA | NA | NA     | NA  | NA | NA | NA |     |
| NA | NA | NA     | NA  | NA | NA | NA |     |
| NA | NA | NA     | NA  | NA | NA | NA |     |
| Y  | y  | 2.5 MG | BID |    | 5  | 1  | 2.5 |
| NA | NA | NA     | NA  | NA | NA | NA |     |
| NA | NA | NA     | NA  | NA | NA | NA |     |
| NA | NA | NA     | NA  | NA | NA | NA |     |
| Y  | NA | NA     | NA  | NA | NA | NA |     |
| NA | NA | NA     | NA  | NA | NA | NA |     |
| NA | NA | NA     | NA  | NA | NA | NA |     |
| NA | NA | NA     | NA  | NA | NA | NA |     |
| NA | NA | NA     | NA  | NA | NA | NA |     |
| NA | y  | 2.5 MG | BID |    | 5  | 12 | 30  |
| NA | NA | NA     | NA  | NA | NA | NA |     |
| NA | NA | NA     | NA  | NA | NA | NA |     |
| NA | NA | NA     | NA  | NA | NA | NA |     |
| NA | NA | NA     | NA  | NA | NA | NA |     |
| Y  | NA | NA     | NA  | NA | NA | NA |     |
| NA | NA | NA     | NA  | NA | NA | NA |     |
| NA | NA | NA     | NA  | NA | NA | NA |     |
| NA | NA | NA     | NA  | NA | NA | NA |     |
| NA | NA | NA     | NA  | NA | NA | NA |     |
| NA | NA | NA     | NA  | NA | NA | NA |     |
| NA | NA | NA     | NA  | NA | NA | NA |     |
| Y  | NA | NA     | NA  | NA | NA | NA |     |
| NA | NA | NA     | NA  | NA | NA | NA |     |
| NA | NA | NA     | NA  | NA | NA | NA |     |
| NA | NA | NA     | NA  | NA | NA | NA |     |
| NA | y  | 2.5 MG | BID |    | 5  | 3  | 7.5 |
| NA | NA | NA     | NA  | NA | NA | NA |     |
| NA | NA | NA     | NA  | NA | NA | NA |     |
| NA | NA | NA     | NA  | NA | NA | NA |     |
| NA | NA | NA     | NA  | NA | NA | NA |     |
| NA | y  | 5 MG   | BID |    | 10 | 5  | 25  |
| NA | NA | NA     | NA  | NA | NA | NA |     |
| NA | NA | NA     | NA  | NA | NA | NA |     |
| NA | y  | 2.5 MG | BID |    | 5  | 10 | 25  |
| NA | NA | NA     | NA  | NA | NA | NA |     |
| Y  | NA | NA     | NA  | NA | NA | NA |     |
| Y  | NA | NA     | NA  | NA | NA | NA |     |
| NA | NA | NA     | NA  | NA | NA | NA |     |
| NA | NA | NA     | NA  | NA | NA | NA |     |
| NA | NA | NA     | NA  | NA | NA | NA |     |

|    |    |      |     |    |    |    |
|----|----|------|-----|----|----|----|
| NA | NA | NA   | NA  | NA | NA | NA |
| NA | NA | NA   | NA  | NA | NA | NA |
| NA | NA | NA   | NA  | NA | NA | NA |
| NA | NA | NA   | NA  | NA | NA | NA |
| NA | NA | NA   | NA  | NA | NA | NA |
| NA | NA | NA   | NA  | NA | NA | NA |
| NA | NA | NA   | NA  | NA | NA | NA |
| NA | NA | NA   | NA  | NA | NA | NA |
| NA | NA | NA   | NA  | NA | NA | NA |
| NA | NA | NA   | NA  | NA | NA | NA |
| NA | NA | NA   | NA  | NA | NA | NA |
| NA | NA | NA   | NA  | NA | NA | NA |
| NA | NA | NA   | NA  | NA | NA | NA |
| NA | NA | NA   | NA  | NA | NA | NA |
| NA | NA | NA   | NA  | NA | NA | NA |
| NA | NA | NA   | NA  | NA | NA | NA |
| NA | NA | NA   | NA  | NA | NA | NA |
| NA | NA | NA   | NA  | NA | NA | NA |
| NA | NA | NA   | NA  | NA | NA | NA |
| Y  | NA | NA   | NA  | NA | NA | NA |
| NA | NA | NA   | NA  | NA | NA | NA |
| NA | NA | NA   | NA  | NA | NA | NA |
| Y  | NA | NA   | NA  | NA | NA | NA |
| NA | NA | NA   | NA  | NA | NA | NA |
| NA | NA | NA   | NA  | NA | NA | NA |
| Y  | NA | NA   | NA  | NA | NA | NA |
| NA | NA | NA   | NA  | NA | NA | NA |
| NA | NA | NA   | NA  | NA | NA | NA |
| NA | NA | NA   | NA  | NA | NA | NA |
| Y  | NA | NA   | NA  | NA | NA | NA |
| NA | NA | NA   | NA  | NA | NA | NA |
| NA | NA | NA   | NA  | NA | NA | NA |
| NA | NA | NA   | NA  | NA | NA | NA |
| Y  | NA | NA   | NA  | NA | NA | NA |
| NA | NA | NA   | NA  | NA | NA | NA |
| NA | NA | NA   | NA  | NA | NA | NA |
| Y  | y  | 5 MG | BID |    | 10 | 5  |
| NA | NA | NA   | NA  | NA | NA | NA |
| NA | NA | NA   | NA  | NA | NA | NA |
| NA | NA | NA   | NA  | NA | NA | NA |
| NA | NA | NA   | NA  | NA | NA | NA |
| NA | NA | NA   | NA  | NA | NA | NA |
| Y  | NA | NA   | NA  | NA | NA | NA |
| NA | NA | NA   | NA  | NA | NA | NA |

|    |    |        |     |    |    |    |     |
|----|----|--------|-----|----|----|----|-----|
| NA | NA | NA     | NA  | NA | NA | NA |     |
| NA | NA | NA     | NA  | NA | NA | NA |     |
| Y  | NA | NA     | NA  | NA | NA | NA |     |
| NA | NA | NA     | NA  | NA | NA | NA |     |
| NA | NA | NA     | NA  | NA | NA | NA |     |
| NA | NA | NA     | NA  | NA | NA | NA |     |
| NA | NA | NA     | NA  | NA | NA | NA |     |
| NA | NA | NA     | NA  | NA | NA | NA |     |
| NA | NA | NA     | NA  | NA | NA | NA |     |
| NA | y  | 2.5 MG | BID |    | 5  | 8  | 20  |
| NA | NA | NA     | NA  | NA | NA | NA |     |
| NA | NA | NA     | NA  | NA | NA | NA |     |
| Y  | NA | NA     | NA  | NA | NA | NA |     |
| Y  | y  | 5 MG   | BID |    | 10 | 2  | 10  |
| NA | NA | NA     | NA  | NA | NA | NA |     |
| Y  | NA | NA     | NA  | NA | NA | NA |     |
| NA | NA | NA     | NA  | NA | NA | NA |     |
| NA | NA | NA     | NA  | NA | NA | NA |     |
| Y  | NA | NA     | NA  | NA | NA | NA |     |
| NA | NA | NA     | NA  | NA | NA | NA |     |
| NA | NA | NA     | NA  | NA | NA | NA |     |
| NA | NA | NA     | NA  | NA | NA | NA |     |
| Y  | NA | NA     | NA  | NA | NA | NA |     |
| NA | NA | NA     | NA  | NA | NA | NA |     |
| NA | NA | NA     | NA  | NA | NA | NA |     |
| NA | NA | NA     | NA  | NA | NA | NA |     |
| NA | NA | NA     | NA  | NA | NA | NA |     |
| NA | NA | NA     | NA  | NA | NA | NA |     |
| NA | NA | NA     | NA  | NA | NA | NA |     |
| NA | NA | NA     | NA  | NA | NA | NA |     |
| NA | NA | NA     | NA  | NA | NA | NA |     |
| NA | NA | NA     | NA  | NA | NA | NA |     |
| NA | NA | NA     | NA  | NA | NA | NA |     |
| NA | NA | NA     | NA  | NA | NA | NA |     |
| NA | NA | NA     | NA  | NA | NA | NA |     |
| NA | NA | NA     | NA  | NA | NA | NA |     |
| NA | NA | NA     | NA  | NA | NA | NA |     |
| NA | y  | 5 MG   | BID |    | 10 | 4  | 20  |
| NA | NA | NA     | NA  | NA | NA | NA |     |
| NA | NA | NA     | NA  | NA | NA | NA |     |
| Y  | y  | 2.5 MG | BID |    | 5  | 3  | 7.5 |
| NA | NA | NA     | NA  | NA | NA | NA |     |
| NA | NA | NA     | NA  | NA | NA | NA |     |
| NA | NA | NA     | NA  | NA | NA | NA |     |
| NA | NA | NA     | NA  | NA | NA | NA |     |
| NA | NA | NA     | NA  | NA | NA | NA |     |
| Y  | y  | 10 MG  | BID |    | 20 | 3  | 30  |
| NA | NA | NA     | NA  | NA | NA | NA |     |
| Y  | NA | NA     | NA  | NA | NA | NA |     |
| NA | NA | NA     | NA  | NA | NA | NA |     |
| NA | NA | NA     | NA  | NA | NA | NA |     |

|    |    |      |     |    |    |    |    |
|----|----|------|-----|----|----|----|----|
| NA | NA | NA   | NA  | NA | NA | NA |    |
| NA | NA | NA   | NA  | NA | NA | NA |    |
| NA | NA | NA   | NA  | NA | NA | NA |    |
| Y  | NA | NA   | NA  | NA | NA | NA |    |
| NA | NA | NA   | NA  | NA | NA | NA |    |
| NA | NA | NA   | NA  | NA | NA | NA |    |
| NA | NA | NA   | NA  | NA | NA | NA |    |
| NA | NA | NA   | NA  | NA | NA | NA |    |
| NA | NA | NA   | NA  | NA | NA | NA |    |
| NA | NA | NA   | NA  | NA | NA | NA |    |
| NA | NA | NA   | NA  | NA | NA | NA |    |
| NA | NA | NA   | NA  | NA | NA | NA |    |
| NA | NA | NA   | NA  | NA | NA | NA |    |
| NA | NA | NA   | NA  | NA | NA | NA |    |
| Y  | NA | NA   | NA  | NA | NA | NA |    |
| NA | NA | NA   | NA  | NA | NA | NA |    |
| NA | NA | NA   | NA  | NA | NA | NA |    |
| NA | NA | NA   | NA  | NA | NA | NA |    |
| Y  | NA | NA   | NA  | NA | NA | NA |    |
| Y  | NA | NA   | NA  | NA | NA | NA |    |
| Y  | NA | NA   | NA  | NA | NA | NA |    |
| NA | NA | NA   | NA  | NA | NA | NA |    |
| Y  | NA | NA   | NA  | NA | NA | NA |    |
| NA | NA | NA   | NA  | NA | NA | NA |    |
| NA | NA | NA   | NA  | NA | NA | NA |    |
| NA | NA | NA   | NA  | NA | NA | NA |    |
| NA | NA | NA   | NA  | NA | NA | NA |    |
| NA | NA | NA   | NA  | NA | NA | NA |    |
| NA | NA | NA   | NA  | NA | NA | NA |    |
| NA | NA | NA   | NA  | NA | NA | NA |    |
| NA | NA | NA   | NA  | NA | NA | NA |    |
| NA | NA | NA   | NA  | NA | NA | NA |    |
| NA | NA | NA   | NA  | NA | NA | NA |    |
| Y  | NA | NA   | NA  | NA | NA | NA |    |
| NA | NA | NA   | NA  | NA | NA | NA |    |
| NA | NA | NA   | NA  | NA | NA | NA |    |
| NA | NA | NA   | NA  | NA | NA | NA |    |
| NA | NA | NA   | NA  | NA | NA | NA |    |
| NA | NA | NA   | NA  | NA | NA | NA |    |
| NA | NA | NA   | NA  | NA | NA | NA |    |
| NA | NA | NA   | NA  | NA | NA | NA |    |
| NA | NA | NA   | NA  | NA | NA | NA |    |
| NA | NA | NA   | NA  | NA | NA | NA |    |
| NA | NA | NA   | NA  | NA | NA | NA |    |
| NA | y  | 5 MG | BID |    | 10 | 14 | 70 |
| NA | NA | NA   | NA  | NA | NA | NA |    |
| NA | NA | NA   | NA  | NA | NA | NA |    |
| NA | NA | NA   | NA  | NA | NA | NA |    |
| NA | NA | NA   | NA  | NA | NA | NA |    |
| NA | NA | NA   | NA  | NA | NA | NA |    |

|    |    |        |            |    |    |    |      |
|----|----|--------|------------|----|----|----|------|
| NA | NA | NA     | NA         | NA | NA | NA |      |
| NA | y  | 5 MG   | BID        |    | 10 | 5  | 25   |
| Y  | NA | NA     | NA         | NA | NA | NA |      |
| NA | y  | 5 MG   | BID        |    | 10 | 1  | 5    |
| NA | NA | NA     | NA         | NA | NA | NA |      |
| NA | NA | NA     | NA         | NA | NA | NA |      |
| Y  | y  | 5 MG   | BID        |    | 10 | 15 | 75   |
| NA | NA | NA     | NA         | NA | NA | NA |      |
| NA | NA | NA     | NA         | NA | NA | NA |      |
| Y  | NA | NA     | NA         | NA | NA | NA |      |
| Y  | NA | NA     | NA         | NA | NA | NA |      |
| NA | NA | NA     | NA         | NA | NA | NA |      |
| NA | NA | NA     | NA         | NA | NA | NA |      |
| NA | NA | NA     | NA         | NA | NA | NA |      |
| NA | NA | NA     | NA         | NA | NA | NA |      |
| NA | NA | NA     | NA         | NA | NA | NA |      |
| Y  | NA | NA     | NA         | NA | NA | NA |      |
| NA | NA | NA     | NA         | NA | NA | NA |      |
| NA | NA | NA     | NA         | NA | NA | NA |      |
| Y  | NA | NA     | NA         | NA | NA | NA |      |
| Y  | NA | NA     | NA         | NA | NA | NA |      |
| NA | NA | NA     | NA         | NA | NA | NA |      |
| Y  | y  | 5 MG   | BID@0600,2 |    | 10 | 7  | 35   |
| NA | y  | 2.5 MG | BID        |    | 5  | 7  | 17.5 |
| NA | NA | NA     | NA         | NA | NA | NA |      |
| NA | NA | NA     | NA         | NA | NA | NA |      |
| Y  | NA | NA     | NA         | NA | NA | NA |      |
| NA | NA | NA     | NA         | NA | NA | NA |      |
| NA | NA | NA     | NA         | NA | NA | NA |      |
| Y  | NA | NA     | NA         | NA | NA | NA |      |
| NA | NA | NA     | NA         | NA | NA | NA |      |
| NA | NA | NA     | NA         | NA | NA | NA |      |
| Y  | NA | NA     | NA         | NA | NA | NA |      |
| NA | NA | NA     | NA         | NA | NA | NA |      |
| NA | NA | NA     | NA         | NA | NA | NA |      |
| NA | NA | NA     | NA         | NA | NA | NA |      |
| NA | NA | NA     | NA         | NA | NA | NA |      |
| NA | NA | NA     | NA         | NA | NA | NA |      |
| NA | NA | NA     | NA         | NA | NA | NA |      |
| Y  | NA | NA     | NA         | NA | NA | NA |      |
| NA | NA | NA     | NA         | NA | NA | NA |      |
| NA | y  | 5 MG   | BID        |    | 10 | 22 | 110  |
| NA | NA | NA     | NA         | NA | NA | NA |      |
| NA | NA | NA     | NA         | NA | NA | NA |      |
| Y  | NA | NA     | NA         | NA | NA | NA |      |
| NA | NA | NA     | NA         | NA | NA | NA |      |
| NA | NA | NA     | NA         | NA | NA | NA |      |
| NA | NA | NA     | NA         | NA | NA | NA |      |
| NA | NA | NA     | NA         | NA | NA | NA |      |
| NA | NA | NA     | NA         | NA | NA | NA |      |
| Y  | NA | NA     | NA         | NA | NA | NA |      |
| NA | NA | NA     | NA         | NA | NA | NA |      |



|    |    |        |     |    |    |    |    |
|----|----|--------|-----|----|----|----|----|
| NA | NA | NA     | NA  | NA | NA | NA |    |
| NA | NA | NA     | NA  | NA | NA | NA |    |
| NA | NA | NA     | NA  | NA | NA | NA |    |
| Y  | NA | NA     | NA  | NA | NA | NA |    |
| NA | NA | NA     | NA  | NA | NA | NA |    |
| NA | NA | NA     | NA  | NA | NA | NA |    |
| NA | NA | NA     | NA  | NA | NA | NA |    |
| NA | y  | 2.5 MG | BID |    | 5  | 6  | 15 |
| NA | NA | NA     | NA  | NA | NA | NA |    |
| NA | NA | NA     | NA  | NA | NA | NA |    |
| NA | NA | NA     | NA  | NA | NA | NA |    |
| NA | NA | NA     | NA  | NA | NA | NA |    |
| NA | NA | NA     | NA  | NA | NA | NA |    |
| NA | NA | NA     | NA  | NA | NA | NA |    |
| NA | NA | NA     | NA  | NA | NA | NA |    |
| NA | NA | NA     | NA  | NA | NA | NA |    |
| NA | NA | NA     | NA  | NA | NA | NA |    |
| Y  | NA | NA     | NA  | NA | NA | NA |    |
| Y  | NA | NA     | NA  | NA | NA | NA |    |
| NA | NA | NA     | NA  | NA | NA | NA |    |
| NA | NA | NA     | NA  | NA | NA | NA |    |
| NA | NA | NA     | NA  | NA | NA | NA |    |
| NA | NA | NA     | NA  | NA | NA | NA |    |
| NA | NA | NA     | NA  | NA | NA | NA |    |
| NA | NA | NA     | NA  | NA | NA | NA |    |
| NA | NA | NA     | NA  | NA | NA | NA |    |
| NA | NA | NA     | NA  | NA | NA | NA |    |
| NA | NA | NA     | NA  | NA | NA | NA |    |
| NA | NA | NA     | NA  | NA | NA | NA |    |
| Y  | NA | NA     | NA  | NA | NA | NA |    |
| Y  | NA | NA     | NA  | NA | NA | NA |    |
| NA | NA | NA     | NA  | NA | NA | NA |    |
| NA | NA | NA     | NA  | NA | NA | NA |    |
| NA | NA | NA     | NA  | NA | NA | NA |    |
| Y  | NA | NA     | NA  | NA | NA | NA |    |
| Y  | NA | NA     | NA  | NA | NA | NA |    |
| NA | NA | NA     | NA  | NA | NA | NA |    |
| NA | NA | NA     | NA  | NA | NA | NA |    |
| NA | NA | NA     | NA  | NA | NA | NA |    |
| Y  | NA | NA     | NA  | NA | NA | NA |    |
| Y  | NA | NA     | NA  | NA | NA | NA |    |
| NA | NA | NA     | NA  | NA | NA | NA |    |
| NA | NA | NA     | NA  | NA | NA | NA |    |
| NA | NA | NA     | NA  | NA | NA | NA |    |

|    |    |      |     |    |    |    |    |
|----|----|------|-----|----|----|----|----|
| Y  | NA | NA   | NA  | NA | NA | NA |    |
| NA | NA | NA   | NA  | NA | NA | NA |    |
| Y  | NA | NA   | NA  | NA | NA | NA |    |
| NA | NA | NA   | NA  | NA | NA | NA |    |
| NA | y  | 5 MG | BID |    | 10 | 4  | 20 |
| NA | NA | NA   | NA  | NA | NA | NA |    |
| NA | NA | NA   | NA  | NA | NA | NA |    |
| NA | NA | NA   | NA  | NA | NA | NA |    |
| NA | NA | NA   | NA  | NA | NA | NA |    |
| Y  | NA | NA   | NA  | NA | NA | NA |    |
| NA | NA | NA   | NA  | NA | NA | NA |    |
| NA | NA | NA   | NA  | NA | NA | NA |    |
| NA | NA | NA   | NA  | NA | NA | NA |    |
| NA | y  | 5 MG | BID |    | 10 | 1  | 5  |
| NA | NA | NA   | NA  | NA | NA | NA |    |
| NA | NA | NA   | NA  | NA | NA | NA |    |
| NA | NA | NA   | NA  | NA | NA | NA |    |
| NA | y  | 5 MG | BID |    | 10 | 6  | 30 |
| NA | NA | NA   | NA  | NA | NA | NA |    |
| Y  | NA | NA   | NA  | NA | NA | NA |    |
| NA | NA | NA   | NA  | NA | NA | NA |    |
| NA | NA | NA   | NA  | NA | NA | NA |    |
| Y  | NA | NA   | NA  | NA | NA | NA |    |
| NA | NA | NA   | NA  | NA | NA | NA |    |
| NA | NA | NA   | NA  | NA | NA | NA |    |
| NA | NA | NA   | NA  | NA | NA | NA |    |
| NA | NA | NA   | NA  | NA | NA | NA |    |
| Y  | NA | NA   | NA  | NA | NA | NA |    |
| NA | NA | NA   | NA  | NA | NA | NA |    |
| NA | NA | NA   | NA  | NA | NA | NA |    |
| NA | NA | NA   | NA  | NA | NA | NA |    |
| NA | NA | NA   | NA  | NA | NA | NA |    |
| NA | NA | NA   | NA  | NA | NA | NA |    |
| NA | NA | NA   | NA  | NA | NA | NA |    |
| NA | NA | NA   | NA  | NA | NA | NA |    |
| NA | NA | NA   | NA  | NA | NA | NA |    |
| NA | NA | NA   | NA  | NA | NA | NA |    |
| NA | NA | NA   | NA  | NA | NA | NA |    |
| NA | NA | NA   | NA  | NA | NA | NA |    |
| Y  | NA | NA   | NA  | NA | NA | NA |    |



|    |    |    |    |    |    |    |
|----|----|----|----|----|----|----|
| NA | NA | NA | NA | NA | NA | NA |
| NA | NA | NA | NA | NA | NA | NA |
| NA | NA | NA | NA | NA | NA | NA |
| Y  | NA | NA | NA | NA | NA | NA |
| NA | NA | NA | NA | NA | NA | NA |
| NA | NA | NA | NA | NA | NA | NA |
| NA | NA | NA | NA | NA | NA | NA |
| Y  | NA | NA | NA | NA | NA | NA |
| Y  | NA | NA | NA | NA | NA | NA |
| NA | NA | NA | NA | NA | NA | NA |
| Y  | NA | NA | NA | NA | NA | NA |
| NA | NA | NA | NA | NA | NA | NA |
| NA | NA | NA | NA | NA | NA | NA |
| Y  | NA | NA | NA | NA | NA | NA |
| NA | NA | NA | NA | NA | NA | NA |
| NA | NA | NA | NA | NA | NA | NA |
| Y  | NA | NA | NA | NA | NA | NA |
| NA | NA | NA | NA | NA | NA | NA |
| NA | NA | NA | NA | NA | NA | NA |
| NA | NA | NA | NA | NA | NA | NA |
| NA | NA | NA | NA | NA | NA | NA |
| NA | NA | NA | NA | NA | NA | NA |
| NA | NA | NA | NA | NA | NA | NA |
| NA | NA | NA | NA | NA | NA | NA |
| NA | NA | NA | NA | NA | NA | NA |
| NA | NA | NA | NA | NA | NA | NA |
| NA | NA | NA | NA | NA | NA | NA |
| NA | NA | NA | NA | NA | NA | NA |
| NA | NA | NA | NA | NA | NA | NA |
| NA | NA | NA | NA | NA | NA | NA |
| NA | NA | NA | NA | NA | NA | NA |
| NA | NA | NA | NA | NA | NA | NA |
| NA | NA | NA | NA | NA | NA | NA |
| NA | NA | NA | NA | NA | NA | NA |
| NA | NA | NA | NA | NA | NA | NA |
| NA | NA | NA | NA | NA | NA | NA |
| NA | NA | NA | NA | NA | NA | NA |
| NA | NA | NA | NA | NA | NA | NA |
| Y  | NA | NA | NA | NA | NA | NA |

7.5

5

3

2.5 MG

BID

y

|    |    |        |     |    |    |    |    |
|----|----|--------|-----|----|----|----|----|
| NA | NA | NA     | NA  | NA | NA | NA |    |
| NA | NA | NA     | NA  | NA | NA | NA |    |
| NA | NA | NA     | NA  | NA | NA | NA |    |
| Y  | NA | NA     | NA  | NA | NA | NA |    |
| NA | NA | NA     | NA  | NA | NA | NA |    |
| NA | NA | NA     | NA  | NA | NA | NA |    |
| NA | NA | NA     | NA  | NA | NA | NA |    |
| NA | NA | NA     | NA  | NA | NA | NA |    |
| Y  | y  | 2.5 MG | BID |    | 5  | 6  | 15 |
| NA | NA | NA     | NA  | NA | NA | NA |    |
| NA | NA | NA     | NA  | NA | NA | NA |    |
| Y  | NA | NA     | NA  | NA | NA | NA |    |
| NA | NA | NA     | NA  | NA | NA | NA |    |
| NA | NA | NA     | NA  | NA | NA | NA |    |
| NA | NA | NA     | NA  | NA | NA | NA |    |
| NA | NA | NA     | NA  | NA | NA | NA |    |
| NA | NA | NA     | NA  | NA | NA | NA |    |
| NA | NA | NA     | NA  | NA | NA | NA |    |
| NA | NA | NA     | NA  | NA | NA | NA |    |
| NA | NA | NA     | NA  | NA | NA | NA |    |
| NA | NA | NA     | NA  | NA | NA | NA |    |
| NA | NA | NA     | NA  | NA | NA | NA |    |
| NA | NA | NA     | NA  | NA | NA | NA |    |
| Y  | NA | NA     | NA  | NA | NA | NA |    |
| Y  | y  | 10 MG  | BID |    | 20 | 6  | 60 |
| NA | NA | NA     | NA  | NA | NA | NA |    |
| NA | NA | NA     | NA  | NA | NA | NA |    |
| NA | NA | NA     | NA  | NA | NA | NA |    |
| NA | NA | NA     | NA  | NA | NA | NA |    |
| NA | NA | NA     | NA  | NA | NA | NA |    |
| NA | NA | NA     | NA  | NA | NA | NA |    |
| NA | NA | NA     | NA  | NA | NA | NA |    |
| NA | NA | NA     | NA  | NA | NA | NA |    |
| NA | NA | NA     | NA  | NA | NA | NA |    |
| NA | NA | NA     | NA  | NA | NA | NA |    |
| NA | NA | NA     | NA  | NA | NA | NA |    |
| NA | NA | NA     | NA  | NA | NA | NA |    |
| NA | NA | NA     | NA  | NA | NA | NA |    |
| NA | NA | NA     | NA  | NA | NA | NA |    |
| Y  | NA | NA     | NA  | NA | NA | NA |    |
| NA | y  | 5 MG   | BID |    | 10 | 2  | 10 |

|    |    |        |     |    |    |    |      |
|----|----|--------|-----|----|----|----|------|
| NA | NA | NA     | NA  | NA | NA | NA |      |
| NA | NA | NA     | NA  | NA | NA | NA |      |
| NA | NA | NA     | NA  | NA | NA | NA |      |
| NA | y  | 10 MG  | BID |    | 20 | 2  | 20   |
| NA | NA | NA     | NA  | NA | NA | NA |      |
| Y  | NA | NA     | NA  | NA | NA | NA |      |
| Y  | NA | NA     | NA  | NA | NA | NA |      |
| NA | y  | 2.5 MG | BID |    | 5  | 5  | 12.5 |
| NA | NA | NA     | NA  | NA | NA | NA |      |
| NA | NA | NA     | NA  | NA | NA | NA |      |
| NA | NA | NA     | NA  | NA | NA | NA |      |
| Y  | NA | NA     | NA  | NA | NA | NA |      |
| Y  | NA | NA     | NA  | NA | NA | NA |      |
| NA | NA | NA     | NA  | NA | NA | NA |      |
| Y  | NA | NA     | NA  | NA | NA | NA |      |
| NA | NA | NA     | NA  | NA | NA | NA |      |
| NA | NA | NA     | NA  | NA | NA | NA |      |
| NA | NA | NA     | NA  | NA | NA | NA |      |
| NA | NA | NA     | NA  | NA | NA | NA |      |
| NA | NA | NA     | NA  | NA | NA | NA |      |
| NA | NA | NA     | NA  | NA | NA | NA |      |
| NA | NA | NA     | NA  | NA | NA | NA |      |
| NA | NA | NA     | NA  | NA | NA | NA |      |
| Y  | NA | NA     | NA  | NA | NA | NA |      |
| NA | NA | NA     | NA  | NA | NA | NA |      |
| NA | NA | NA     | NA  | NA | NA | NA |      |
| NA | NA | NA     | NA  | NA | NA | NA |      |
| NA | NA | NA     | NA  | NA | NA | NA |      |
| Y  | y  | 2.5 MG | BID |    | 5  | 3  | 7.5  |
| NA | NA | NA     | NA  | NA | NA | NA |      |
| NA | NA | NA     | NA  | NA | NA | NA |      |
| Y  | NA | NA     | NA  | NA | NA | NA |      |
| Y  | NA | NA     | NA  | NA | NA | NA |      |
| NA | NA | NA     | NA  | NA | NA | NA |      |
| NA | NA | NA     | NA  | NA | NA | NA |      |
| NA | NA | NA     | NA  | NA | NA | NA |      |
| NA | NA | NA     | NA  | NA | NA | NA |      |
| NA | NA | NA     | NA  | NA | NA | NA |      |
| Y  | y  | 5 MG   | BID |    | 10 | 26 | 130  |
| NA | NA | NA     | NA  | NA | NA | NA |      |
| NA | NA | NA     | NA  | NA | NA | NA |      |
| NA | NA | NA     | NA  | NA | NA | NA |      |
| NA | NA | NA     | NA  | NA | NA | NA |      |
| NA | NA | NA     | NA  | NA | NA | NA |      |







|    |    |       |     |    |    |    |     |
|----|----|-------|-----|----|----|----|-----|
| NA | NA | NA    | NA  | NA | NA | NA |     |
| NA | NA | NA    | NA  | NA | NA | NA |     |
| NA | NA | NA    | NA  | NA | NA | NA |     |
| NA | NA | NA    | NA  | NA | NA | NA |     |
| NA | NA | NA    | NA  | NA | NA | NA |     |
| NA | NA | NA    | NA  | NA | NA | NA |     |
| NA | NA | NA    | NA  | NA | NA | NA |     |
| NA | NA | NA    | NA  | NA | NA | NA |     |
| NA | NA | NA    | NA  | NA | NA | NA |     |
| NA | NA | NA    | NA  | NA | NA | NA |     |
| Y  | y  | 5 MG  | BID |    | 10 | 30 | 150 |
| NA | NA | NA    | NA  | NA | NA | NA |     |
| NA | NA | NA    | NA  | NA | NA | NA |     |
| Y  | NA | NA    | NA  | NA | NA | NA |     |
| NA | NA | NA    | NA  | NA | NA | NA |     |
| NA | NA | NA    | NA  | NA | NA | NA |     |
| NA | NA | NA    | NA  | NA | NA | NA |     |
| NA | NA | NA    | NA  | NA | NA | NA |     |
| NA | NA | NA    | NA  | NA | NA | NA |     |
| NA | NA | NA    | NA  | NA | NA | NA |     |
| NA | NA | NA    | NA  | NA | NA | NA |     |
| Y  | NA | NA    | NA  | NA | NA | NA |     |
| NA | NA | NA    | NA  | NA | NA | NA |     |
| NA | NA | NA    | NA  | NA | NA | NA |     |
| NA | NA | NA    | NA  | NA | NA | NA |     |
| NA | NA | NA    | NA  | NA | NA | NA |     |
| NA | NA | NA    | NA  | NA | NA | NA |     |
| NA | NA | NA    | NA  | NA | NA | NA |     |
| NA | NA | NA    | NA  | NA | NA | NA |     |
| NA | NA | NA    | NA  | NA | NA | NA |     |
| NA | NA | NA    | NA  | NA | NA | NA |     |
| NA | NA | NA    | NA  | NA | NA | NA |     |
| NA | NA | NA    | NA  | NA | NA | NA |     |
| NA | NA | NA    | NA  | NA | NA | NA |     |
| NA | NA | NA    | NA  | NA | NA | NA |     |
| NA | NA | NA    | NA  | NA | NA | NA |     |
| NA | NA | NA    | NA  | NA | NA | NA |     |
| NA | NA | NA    | NA  | NA | NA | NA |     |
| NA | NA | NA    | NA  | NA | NA | NA |     |
| NA | NA | NA    | NA  | NA | NA | NA |     |
| NA | NA | NA    | NA  | NA | NA | NA |     |
| NA | y  | 10 MG | BID |    | 20 | 6  | 60  |
| NA | NA | NA    | NA  | NA | NA | NA |     |
| NA | NA | NA    | NA  | NA | NA | NA |     |
| Y  | NA | NA    | NA  | NA | NA | NA |     |
| Y  | NA | NA    | NA  | NA | NA | NA |     |
| NA | NA | NA    | NA  | NA | NA | NA |     |
| NA | NA | NA    | NA  | NA | NA | NA |     |
| NA | NA | NA    | NA  | NA | NA | NA |     |

|    |    |      |        |    |    |    |    |
|----|----|------|--------|----|----|----|----|
| NA | NA | NA   | NA     | NA | NA | NA |    |
| NA | y  | 5 MG | BID    |    | 10 | 18 | 90 |
| Y  | NA | NA   | NA     | NA | NA | NA |    |
| NA | NA | NA   | NA     | NA | NA | NA |    |
| Y  | NA | NA   | NA     | NA | NA | NA |    |
| NA | NA | NA   | NA     | NA | NA | NA |    |
| NA | NA | NA   | NA     | NA | NA | NA |    |
| NA | NA | NA   | NA     | NA | NA | NA |    |
| NA | NA | NA   | NA     | NA | NA | NA |    |
| NA | NA | NA   | NA     | NA | NA | NA |    |
| NA | NA | NA   | NA     | NA | NA | NA |    |
| NA | NA | NA   | NA     | NA | NA | NA |    |
| NA | NA | NA   | NA     | NA | NA | NA |    |
| NA | NA | NA   | NA     | NA | NA | NA |    |
| NA | NA | NA   | NA     | NA | NA | NA |    |
| Y  | NA | NA   | NA     | NA | NA | NA |    |
| NA | NA | NA   | NA     | NA | NA | NA |    |
| Y  | NA | NA   | NA     | NA | NA | NA |    |
| NA | NA | NA   | NA     | NA | NA | NA |    |
| NA | NA | NA   | NA     | NA | NA | NA |    |
| Y  | NA | NA   | NA     | NA | NA | NA |    |
| NA | NA | NA   | NA     | NA | NA | NA |    |
| NA | NA | NA   | NA     | NA | NA | NA |    |
| NA | NA | NA   | NA     | NA | NA | NA |    |
| Y  | NA | NA   | NA     | NA | NA | NA |    |
| NA | NA | NA   | NA     | NA | NA | NA |    |
| NA | NA | NA   | NA     | NA | NA | NA |    |
| NA | NA | NA   | NA     | NA | NA | NA |    |
| NA | NA | NA   | NA     | NA | NA | NA |    |
| NA | NA | NA   | NA     | NA | NA | NA |    |
| NA | NA | NA   | NA     | NA | NA | NA |    |
| NA | NA | NA   | NA     | NA | NA | NA |    |
| NA | NA | NA   | NA     | NA | NA | NA |    |
| NA | NA | NA   | NA     | NA | NA | NA |    |
| NA | NA | NA   | NA     | NA | NA | NA |    |
| NA | NA | NA   | NA     | NA | NA | NA |    |
| NA | NA | NA   | NA     | NA | NA | NA |    |
| NA | NA | NA   | NA     | NA | NA | NA |    |
| NA | NA | NA   | NA     | NA | NA | NA |    |
| NA | y  | 5 MG | Q12H 6 |    | 10 | 12 | 60 |
| NA | NA | NA   | NA     | NA | NA | NA |    |



|    |    |    |    |    |    |    |
|----|----|----|----|----|----|----|
| NA | NA | NA | NA | NA | NA | NA |
| NA | NA | NA | NA | NA | NA | NA |
| Y  | NA | NA | NA | NA | NA | NA |
| NA | NA | NA | NA | NA | NA | NA |
| NA | NA | NA | NA | NA | NA | NA |
| NA | NA | NA | NA | NA | NA | NA |
| NA | NA | NA | NA | NA | NA | NA |
| NA | NA | NA | NA | NA | NA | NA |
| NA | NA | NA | NA | NA | NA | NA |
| NA | NA | NA | NA | NA | NA | NA |
| Y  | NA | NA | NA | NA | NA | NA |
| NA | NA | NA | NA | NA | NA | NA |
| NA | NA | NA | NA | NA | NA | NA |
| NA | NA | NA | NA | NA | NA | NA |
| NA | NA | NA | NA | NA | NA | NA |
| Y  | NA | NA | NA | NA | NA | NA |
| NA | NA | NA | NA | NA | NA | NA |
| Y  | NA | NA | NA | NA | NA | NA |
| NA | NA | NA | NA | NA | NA | NA |
| NA | NA | NA | NA | NA | NA | NA |
| NA | NA | NA | NA | NA | NA | NA |
| NA | NA | NA | NA | NA | NA | NA |
| NA | NA | NA | NA | NA | NA | NA |
| NA | NA | NA | NA | NA | NA | NA |
| NA | NA | NA | NA | NA | NA | NA |
| NA | NA | NA | NA | NA | NA | NA |
| NA | NA | NA | NA | NA | NA | NA |
| NA | NA | NA | NA | NA | NA | NA |
| NA | NA | NA | NA | NA | NA | NA |
| NA | NA | NA | NA | NA | NA | NA |
| NA | NA | NA | NA | NA | NA | NA |
| NA | NA | NA | NA | NA | NA | NA |
| Y  | NA | NA | NA | NA | NA | NA |

|    |    |      |     |    |    |    |    |
|----|----|------|-----|----|----|----|----|
| NA | NA | NA   | NA  | NA | NA | NA |    |
| Y  | NA | NA   | NA  | NA | NA | NA |    |
| Y  | NA | NA   | NA  | NA | NA | NA |    |
| NA | NA | NA   | NA  | NA | NA | NA |    |
| NA | NA | NA   | NA  | NA | NA | NA |    |
| NA | NA | NA   | NA  | NA | NA | NA |    |
| NA | NA | NA   | NA  | NA | NA | NA |    |
| NA | NA | NA   | NA  | NA | NA | NA |    |
| NA | NA | NA   | NA  | NA | NA | NA |    |
| NA | y  | 5 MG | BID |    | 10 | 15 | 75 |
| NA | NA | NA   | NA  | NA | NA | NA |    |
| NA | NA | NA   | NA  | NA | NA | NA |    |
| NA | NA | NA   | NA  | NA | NA | NA |    |
| NA | NA | NA   | NA  | NA | NA | NA |    |
| NA | NA | NA   | NA  | NA | NA | NA |    |
| Y  | NA | NA   | NA  | NA | NA | NA |    |
| Y  | NA | NA   | NA  | NA | NA | NA |    |
| NA | NA | NA   | NA  | NA | NA | NA |    |
| NA | NA | NA   | NA  | NA | NA | NA |    |
| NA | NA | NA   | NA  | NA | NA | NA |    |
| NA | NA | NA   | NA  | NA | NA | NA |    |
| NA | NA | NA   | NA  | NA | NA | NA |    |
| NA | NA | NA   | NA  | NA | NA | NA |    |
| NA | NA | NA   | NA  | NA | NA | NA |    |
| NA | NA | NA   | NA  | NA | NA | NA |    |
| NA | NA | NA   | NA  | NA | NA | NA |    |
| NA | NA | NA   | NA  | NA | NA | NA |    |
| NA | NA | NA   | NA  | NA | NA | NA |    |
| NA | NA | NA   | NA  | NA | NA | NA |    |
| NA | NA | NA   | NA  | NA | NA | NA |    |
| Y  | NA | NA   | NA  | NA | NA | NA |    |
| NA | NA | NA   | NA  | NA | NA | NA |    |
| NA | NA | NA   | NA  | NA | NA | NA |    |
| NA | NA | NA   | NA  | NA | NA | NA |    |
| NA | NA | NA   | NA  | NA | NA | NA |    |
| Y  | NA | NA   | NA  | NA | NA | NA |    |
| Y  | NA | NA   | NA  | NA | NA | NA |    |



|    |    |        |     |    |    |    |      |
|----|----|--------|-----|----|----|----|------|
| NA | NA | NA     | NA  | NA | NA | NA |      |
| Y  | NA | NA     | NA  | NA | NA | NA |      |
| NA | NA | NA     | NA  | NA | NA | NA |      |
| NA | NA | NA     | NA  | NA | NA | NA |      |
| NA | NA | NA     | NA  | NA | NA | NA |      |
| NA | NA | NA     | NA  | NA | NA | NA |      |
| NA | y  | 5 MG   | BID |    | 10 | 4  | 20   |
| NA | NA | NA     | NA  | NA | NA | NA |      |
| NA | NA | NA     | NA  | NA | NA | NA |      |
| NA | NA | NA     | NA  | NA | NA | NA |      |
| NA | NA | NA     | NA  | NA | NA | NA |      |
| NA | NA | NA     | NA  | NA | NA | NA |      |
| Y  | NA | NA     | NA  | NA | NA | NA |      |
| NA | y  | 2.5 MG | BID |    | 5  | 7  | 17.5 |
| NA | NA | NA     | NA  | NA | NA | NA |      |
| NA | NA | NA     | NA  | NA | NA | NA |      |
| NA | NA | NA     | NA  | NA | NA | NA |      |
| Y  | NA | NA     | NA  | NA | NA | NA |      |
| Y  | NA | NA     | NA  | NA | NA | NA |      |
| NA | NA | NA     | NA  | NA | NA | NA |      |
| NA | NA | NA     | NA  | NA | NA | NA |      |
| NA | NA | NA     | NA  | NA | NA | NA |      |
| NA | NA | NA     | NA  | NA | NA | NA |      |
| NA | NA | NA     | NA  | NA | NA | NA |      |
| NA | NA | NA     | NA  | NA | NA | NA |      |
| Y  | NA | NA     | NA  | NA | NA | NA |      |
| NA | NA | NA     | NA  | NA | NA | NA |      |
| NA | NA | NA     | NA  | NA | NA | NA |      |
| NA | NA | NA     | NA  | NA | NA | NA |      |
| NA | NA | NA     | NA  | NA | NA | NA |      |
| NA | NA | NA     | NA  | NA | NA | NA |      |
| NA | NA | NA     | NA  | NA | NA | NA |      |
| NA | NA | NA     | NA  | NA | NA | NA |      |
| NA | NA | NA     | NA  | NA | NA | NA |      |
| NA | NA | NA     | NA  | NA | NA | NA |      |
| NA | NA | NA     | NA  | NA | NA | NA |      |
| NA | NA | NA     | NA  | NA | NA | NA |      |
| NA | NA | NA     | NA  | NA | NA | NA |      |
| Y  | y  | 5 MG   | BID |    | 10 | 14 | 70   |
| NA | NA | NA     | NA  | NA | NA | NA |      |





|    |    |    |    |    |    |    |
|----|----|----|----|----|----|----|
| NA | NA | NA | NA | NA | NA | NA |
| NA | NA | NA | NA | NA | NA | NA |
| NA | NA | NA | NA | NA | NA | NA |
| NA | NA | NA | NA | NA | NA | NA |
| Y  | NA | NA | NA | NA | NA | NA |
| NA | NA | NA | NA | NA | NA | NA |
| NA | NA | NA | NA | NA | NA | NA |

|    |        |       |    |     |               |             |
|----|--------|-------|----|-----|---------------|-------------|
| NA | NA     | NA    | NA | NA  | NA            | NA          |
| Y  | 40 MG  | DAILY |    | 160 | 4 0.66806961  | Low         |
| Y  | 40 MG  | DAILY |    | 120 | 3 0.62992126  | Low         |
| NA | NA     | NA    | NA | NA  | NA            | NA          |
| Y  | 40 MG  | DAILY |    | 280 | 7 0.53333333  | Low         |
| NA | NA     | NA    | NA | NA  | NA            | NA          |
| NA | NA     | NA    | NA | NA  | NA            | NA          |
| NA | NA     | NA    | NA | NA  | NA            | NA          |
| Y  | 40 MG  | DAILY |    | 120 | 3 0.44092683  | Low         |
| NA | NA     | NA    | NA | NA  | NA            | NA          |
| NA | NA     | NA    | NA | NA  | NA            | NA          |
| NA | NA     | NA    | NA | NA  | NA            | NA          |
| NA | NA     | NA    | NA | NA  | NA            | NA          |
| NA | NA     | NA    | NA | NA  | NA            | NA          |
| Y  | 40 MG  | DAILY |    | 160 | 4 0.70397747  | Low         |
| NA | NA     | NA    | NA | NA  | NA            | NA          |
| NA | NA     | NA    | NA | NA  | NA            | NA          |
| NA | NA     | NA    | NA | NA  | NA            | NA          |
| NA | NA     | NA    | NA | NA  | NA            | NA          |
| NA | NA     | NA    | NA | NA  | NA            | NA          |
| Y  | 100 MG | Q12HR |    | 600 | 6 1.58730159  | Therapeutic |
| Y  | 40 MG  | DAILY |    | 280 | 7 0.62853551  | Low         |
| NA | NA     | NA    | NA | NA  | NA            | NA          |
| NA | NA     | NA    | NA | NA  | NA            | NA          |
| Y  | 40 MG  | DAILY |    | 120 | 3 0.65189048  | Low         |
| Y  | 40 MG  | QHS   |    | 320 | 8 0.4008016   | Low         |
| Y  | 40 MG  | DAILY |    | 760 | 19 0.4040404  | Low         |
| NA | NA     | NA    | NA | NA  | NA            | NA          |
| Y  | 40 MG  | Q24H  |    | 40  | 1 0.51873274  | Low         |
| Y  | 40 MG  | Q24H  |    | 160 | 4 0.38259206  | Low         |
| NA | NA     | NA    | NA | NA  | NA            | NA          |
| NA | NA     | NA    | NA | NA  | NA            | NA          |
| NA | NA     | NA    | NA | NA  | NA            | NA          |
| NA | NA     | NA    | NA | NA  | NA            | NA          |
| Y  | 40 MG  | DAILY |    | 120 | 3 0.48887802  | Low         |
| NA | NA     | NA    | NA | NA  | NA            | NA          |
| Y  | 40 MG  | DAILY |    | 80  | 2 0.48887802  | Low         |
| Y  | 40 MG  | DAILY |    | 480 | 12 0.50062578 | Low         |
| NA | NA     | NA    | NA | NA  | NA            | NA          |
| NA | NA     | NA    | NA | NA  | NA            | NA          |
| Y  | 40 MG  | Q24H  |    | 320 | 8 0.44092683  | Low         |
| NA | NA     | NA    | NA | NA  | NA            | NA          |
| NA | NA     | NA    | NA | NA  | NA            | NA          |
| NA | NA     | NA    | NA | NA  | NA            | NA          |



|    |        |       |    |      |    |                        |
|----|--------|-------|----|------|----|------------------------|
| NA | NA     | NA    | NA | NA   | NA | NA                     |
| Y  | 40 MG  | DAILY |    | 200  | 5  | 0.46067028 Low         |
| NA | NA     | NA    | NA | NA   | NA | NA                     |
| NA | NA     | NA    | NA | NA   | NA | NA                     |
| Y  | 40 MG  | DAILY |    | 120  | 3  | 0.41992987 Low         |
| NA | NA     | NA    | NA | NA   | NA | NA                     |
| Y  | 40 MG  | Q24H  |    | 240  | 6  | 0.58789812 Low         |
| Y  | 110 MG | BID   |    | 3300 | 30 | 2.49716232 Therapeutic |
| Y  | 40 MG  | Q24H  |    | 440  | 11 | 0.4631774 Low          |
| Y  | 40 MG  | Q24H  |    | 80   | 2  | 0.3539823 Low          |
| NA | NA     | NA    | NA | NA   | NA | NA                     |
| Y  | 40 MG  | Q24H  |    | 40   | 1  | 0.51766533 Low         |
| NA | NA     | NA    | NA | NA   | NA | NA                     |
| NA | NA     | NA    | NA | NA   | NA | NA                     |
| NA | NA     | NA    | NA | NA   | NA | NA                     |
| NA | NA     | NA    | NA | NA   | NA | NA                     |
| Y  | 40 MG  | DAILY |    | 240  | 6  | 0.51766533 Low         |
| NA | NA     | NA    | NA | NA   | NA | NA                     |
| NA | NA     | NA    | NA | NA   | NA | NA                     |
| NA | NA     | NA    | NA | NA   | NA | NA                     |
| Y  | 40 MG  | DAILY |    | 240  | 6  | 0.53333333 Low         |
| Y  | 120 MG | Q12H  |    | 3720 | 31 | 1.85256658 Therapeutic |
| NA | NA     | NA    | NA | NA   | NA | NA                     |
| NA | NA     | NA    | NA | NA   | NA | NA                     |
| NA | NA     | NA    | NA | NA   | NA | NA                     |
| NA | NA     | NA    | NA | NA   | NA | NA                     |
| NA | NA     | NA    | NA | NA   | NA | NA                     |
| NA | NA     | NA    | NA | NA   | NA | NA                     |
| NA | NA     | NA    | NA | NA   | NA | NA                     |
| NA | NA     | NA    | NA | NA   | NA | NA                     |
| NA | NA     | NA    | NA | NA   | NA | NA                     |
| NA | NA     | NA    | NA | NA   | NA | NA                     |
| Y  | 40 MG  | DAILY |    | 320  | 8  | 0.71428571 Low         |
| NA | NA     | NA    | NA | NA   | NA | NA                     |
| NA | NA     | NA    | NA | NA   | NA | NA                     |
| NA | NA     | NA    | NA | NA   | NA | NA                     |
| NA | NA     | NA    | NA | NA   | NA | NA                     |
| NA | NA     | NA    | NA | NA   | NA | NA                     |
| NA | NA     | NA    | NA | NA   | NA | NA                     |
| Y  | 40 MG  | DAILY |    | 120  | 3  | 0.59166346 Low         |
| Y  | 40 MG  | DAILY |    | 120  | 3  | 0.48887802 Low         |
| NA | NA     | NA    | NA | NA   | NA | NA                     |
| NA | NA     | NA    | NA | NA   | NA | NA                     |
| NA | NA     | NA    | NA | NA   | NA | NA                     |
| NA | NA     | NA    | NA | NA   | NA | NA                     |

|    |       |        |    |     |    |                        |
|----|-------|--------|----|-----|----|------------------------|
| NA | NA    | NA     | NA | NA  | NA | NA                     |
| NA | NA    | NA     | NA | NA  | NA | NA                     |
| Y  | 40 MG | DAILY  |    | 560 | 14 | 0.41906757 Low         |
| NA | NA    | NA     | NA | NA  | NA | NA                     |
| NA | NA    | NA     | NA | NA  | NA | NA                     |
| NA | NA    | NA     | NA | NA  | NA | NA                     |
| NA | NA    | NA     | NA | NA  | NA | NA                     |
| Y  | 30 MG | DAILY  |    | 90  | 3  | 0.44001173 Low         |
| NA | NA    | NA     | NA | NA  | NA | NA                     |
| Y  | 40 MG | DAILY  |    | 320 | 8  | 0.4399956 Low          |
| NA | NA    | NA     | NA | NA  | NA | NA                     |
| Y  | 40 MG | DAILY  |    | 40  | 1  | 0.58479532 Low         |
| NA | NA    | NA     | NA | NA  | NA | NA                     |
| NA | NA    | NA     | NA | NA  | NA | NA                     |
| NA | NA    | NA     | NA | NA  | NA | NA                     |
| NA | NA    | NA     | NA | NA  | NA | NA                     |
| Y  | 40 MG | DAILY  |    | 280 | 7  | 0.67911715 Low         |
| Y  | 80 MG | Q12H   |    | 800 | 10 | 1.93003619 Therapeutic |
| Y  | 40 MG | Q24H   |    | 160 | 4  | 0.58668231 Low         |
| Y  | 40 MG | DAILY  |    | 160 | 4  | 0.6298915 Low          |
| NA | NA    | NA     | NA | NA  | NA | NA                     |
| Y  | 40 MG | Q12H 9 |    | 200 | 5  | 0.82987552 Low         |
| NA | NA    | NA     | NA | NA  | NA | NA                     |
| Y  | 30 MG | Q24H   |    | 60  | 2  | 0.42583392 Low         |
| NA | NA    | NA     | NA | NA  | NA | NA                     |
| NA | NA    | NA     | NA | NA  | NA | NA                     |
| NA | NA    | NA     | NA | NA  | NA | NA                     |
| Y  | 40 MG | DAILY  |    | 160 | 4  | 0.4 Low                |
| NA | NA    | NA     | NA | NA  | NA | NA                     |
| NA | NA    | NA     | NA | NA  | NA | NA                     |
| NA | NA    | NA     | NA | NA  | NA | NA                     |
| NA | NA    | NA     | NA | NA  | NA | NA                     |
| NA | NA    | NA     | NA | NA  | NA | NA                     |
| NA | NA    | NA     | NA | NA  | NA | NA                     |
| NA | NA    | NA     | NA | NA  | NA | NA                     |
| Y  | 40 MG | DAILY  |    | 40  | 1  | 0.355584 Low           |
| NA | NA    | NA     | NA | NA  | NA | NA                     |
| NA | NA    | NA     | NA | NA  | NA | NA                     |
| NA | NA    | NA     | NA | NA  | NA | NA                     |
| Y  | 40 MG | Q24H   |    | 320 | 8  | 0.63291139 Low         |
| NA | NA    | NA     | NA | NA  | NA | NA                     |
| NA | NA    | NA     | NA | NA  | NA | NA                     |

|    |        |             |    |      |    |                         |
|----|--------|-------------|----|------|----|-------------------------|
| NA | NA     | NA          | NA | NA   | NA | NA                      |
| NA | NA     | NA          | NA | NA   | NA | NA                      |
| NA | NA     | NA          | NA | NA   | NA | NA                      |
| NA | NA     | NA          | NA | NA   | NA | NA                      |
| NA | NA     | NA          | NA | NA   | NA | NA                      |
| NA | NA     | NA          | NA | NA   | NA | NA                      |
| NA | NA     | NA          | NA | NA   | NA | NA                      |
| Y  | 40 MG  | Q12H        |    | 680  | 17 | 1.09995875 Intermediate |
| NA | NA     | NA          | NA | NA   | NA | NA                      |
| NA | NA     | NA          | NA | NA   | NA | NA                      |
| Y  | 40 MG  | Q24H        |    | 80   | 2  | 0.67693349 Low          |
| NA | NA     | NA          | NA | NA   | NA | NA                      |
| NA | NA     | NA          | NA | NA   | NA | NA                      |
| Y  | 40 MG  | BID         |    | 1680 | 42 | 0.8799912 Low           |
| NA | NA     | NA          | NA | NA   | NA | NA                      |
| Y  | 90 MG  | BID@0200,1. |    | 90   | 1  | 1.91082803 Therapeutic  |
| NA | NA     | NA          | NA | NA   | NA | NA                      |
| NA | NA     | NA          | NA | NA   | NA | NA                      |
| NA | NA     | NA          | NA | NA   | NA | NA                      |
| NA | NA     | NA          | NA | NA   | NA | NA                      |
| Y  | 40 MG  | DAILY       |    | 160  | 4  | 0.59584103 Low          |
| NA | NA     | NA          | NA | NA   | NA | NA                      |
| NA | NA     | NA          | NA | NA   | NA | NA                      |
| NA | NA     | NA          | NA | NA   | NA | NA                      |
| Y  | 40 MG  | DAILY       |    | 80   | 2  | 0.56777857 Low          |
| NA | NA     | NA          | NA | NA   | NA | NA                      |
| NA | NA     | NA          | NA | NA   | NA | NA                      |
| NA | NA     | NA          | NA | NA   | NA | NA                      |
| NA | NA     | NA          | NA | NA   | NA | NA                      |
| Y  | 40 MG  | DAILY       |    | 40   | 1  | 0.33846675 Low          |
| NA | NA     | NA          | NA | NA   | NA | NA                      |
| NA | NA     | NA          | NA | NA   | NA | NA                      |
| NA | NA     | NA          | NA | NA   | NA | NA                      |
| Y  | 100 MG | Q12H        |    | 400  | 4  | 1.99960008 Therapeutic  |
| Y  | 70 MG  | Q12H        |    | 1120 | 16 | 1.94444444 Therapeutic  |
| Y  | 90 MG  | Q12H        |    | 3330 | 37 | 1.98417073 Therapeutic  |
| NA | NA     | NA          | NA | NA   | NA | NA                      |
| NA | NA     | NA          | NA | NA   | NA | NA                      |
| NA | NA     | NA          | NA | NA   | NA | NA                      |
| NA | NA     | NA          | NA | NA   | NA | NA                      |
| NA | NA     | NA          | NA | NA   | NA | NA                      |
| NA | NA     | NA          | NA | NA   | NA | NA                      |
| Y  | 40 MG  | DAILY       |    | 600  | 15 | 0.51766533 Low          |
| NA | NA     | NA          | NA | NA   | NA | NA                      |

|    |       |       |    |      |    |                        |
|----|-------|-------|----|------|----|------------------------|
| NA | NA    | NA    | NA | NA   | NA | NA                     |
| NA | NA    | NA    | NA | NA   | NA | NA                     |
| NA | NA    | NA    | NA | NA   | NA | NA                     |
| NA | NA    | NA    | NA | NA   | NA | NA                     |
| NA | NA    | NA    | NA | NA   | NA | NA                     |
| NA | NA    | NA    | NA | NA   | NA | NA                     |
| NA | NA    | NA    | NA | NA   | NA | NA                     |
| NA | NA    | NA    | NA | NA   | NA | NA                     |
| NA | NA    | NA    | NA | NA   | NA | NA                     |
| Y  | 40 MG | DAILY |    | 360  | 9  | 0.39880359 Low         |
| NA | NA    | NA    | NA | NA   | NA | NA                     |
| NA | NA    | NA    | NA | NA   | NA | NA                     |
| NA | NA    | NA    | NA | NA   | NA | NA                     |
| NA | NA    | NA    | NA | NA   | NA | NA                     |
| NA | NA    | NA    | NA | NA   | NA | NA                     |
| NA | NA    | NA    | NA | NA   | NA | NA                     |
| NA | NA    | NA    | NA | NA   | NA | NA                     |
| NA | NA    | NA    | NA | NA   | NA | NA                     |
| Y  | 40 MG | Q24H  |    | 80   | 2  | 0.49019608 Low         |
| Y  | 40 MG | DAILY |    | 40   | 1  | 0.4399956 Low          |
| Y  | 40 MG | Q24H  |    | 40   | 1  | 0.60688818 Low         |
| NA | NA    | NA    | NA | NA   | NA | NA                     |
| Y  | 90 MG | Q12H  |    | 90   | 1  | 1.85375901 Therapeutic |
| NA | NA    | NA    | NA | NA   | NA | NA                     |
| NA | NA    | NA    | NA | NA   | NA | NA                     |
| Y  | 40 MG | DAILY |    | 400  | 10 | 0.63452783 Low         |
| Y  | 40 MG | DAILY |    | 240  | 6  | 0.51766533 Low         |
| NA | NA    | NA    | NA | NA   | NA | NA                     |
| NA | NA    | NA    | NA | NA   | NA | NA                     |
| NA | NA    | NA    | NA | NA   | NA | NA                     |
| Y  | 40 MG | Q12H  |    | 160  | 4  | 0.97775605 Low         |
| Y  | 40 MG | Q24H  |    | 240  | 6  | 0.46560354 Low         |
| NA | NA    | NA    | NA | NA   | NA | NA                     |
| Y  | 40 MG | DAILY |    | 120  | 3  | 0.48887802 Low         |
| Y  | 30 MG | Q24H  |    | 450  | 15 | 0.73331704 Low         |
| NA | NA    | NA    | NA | NA   | NA | NA                     |
| NA | NA    | NA    | NA | NA   | NA | NA                     |
| Y  | 80 MG | Q12H  |    | 1520 | 19 | 1.9555121 Therapeutic  |
| NA | NA    | NA    | NA | NA   | NA | NA                     |
| NA | NA    | NA    | NA | NA   | NA | NA                     |
| Y  | 40 MG | DAILY |    | 40   | 1  | 0.60698027 Low         |
| Y  | 30 MG | STAT  |    | 30   | 1  | 0.4 Low                |
| NA | NA    | NA    | NA | NA   | NA | NA                     |
| NA | NA    | NA    | NA | NA   | NA | NA                     |
| NA | NA    | NA    | NA | NA   | NA | NA                     |

|    |        |       |    |     |    |                         |
|----|--------|-------|----|-----|----|-------------------------|
| NA | NA     | NA    | NA | NA  | NA | NA                      |
| NA | NA     | NA    | NA | NA  | NA | NA                      |
| NA | NA     | NA    | NA | NA  | NA | NA                      |
| NA | NA     | NA    | NA | NA  | NA | NA                      |
| Y  | 40 MG  | Q24H  |    | 320 | 8  | 0.55401662 Low          |
| Y  | 40 MG  | DAILY |    | 40  | 1  | 0.53445212 Low          |
| Y  | 40 MG  | Q12H  |    | 80  | 2  | 0.86271972 Low          |
| Y  | 100 MG | Q12H  |    | 700 | 7  | 1.69779287 Therapeutic  |
| NA | NA     | NA    | NA | NA  | NA | NA                      |
| NA | NA     | NA    | NA | NA  | NA | NA                      |
| NA | NA     | NA    | NA | NA  | NA | NA                      |
| NA | NA     | NA    | NA | NA  | NA | NA                      |
| Y  | 40 MG  | DAILY |    | 40  | 1  | 0.4399956 Low           |
| NA | NA     | NA    | NA | NA  | NA | NA                      |
| NA | NA     | NA    | NA | NA  | NA | NA                      |
| NA | NA     | NA    | NA | NA  | NA | NA                      |
| NA | NA     | NA    | NA | NA  | NA | NA                      |
| Y  | 40 MG  | DAILY |    | 360 | 9  | 0.41906757 Low          |
| NA | NA     | NA    | NA | NA  | NA | NA                      |
| Y  | 40 MG  | Q24H  |    | 280 | 7  | 0.65789474 Low          |
| NA | NA     | NA    | NA | NA  | NA | NA                      |
| NA | NA     | NA    | NA | NA  | NA | NA                      |
| Y  | 40 MG  | DAILY |    | 80  | 2  | 0.78570026 Low          |
| NA | NA     | NA    | NA | NA  | NA | NA                      |
| Y  | 40 MG  | DAILY |    | 200 | 5  | 0.50391161 Low          |
| NA | NA     | NA    | NA | NA  | NA | NA                      |
| NA | NA     | NA    | NA | NA  | NA | NA                      |
| Y  | 40 MG  | DAILY |    | 360 | 9  | 0.66666667 Low          |
| Y  | 40 MG  | QHS   |    | 40  | 1  | 0.55115398 Low          |
| NA | NA     | NA    | NA | NA  | NA | NA                      |
| NA | NA     | NA    | NA | NA  | NA | NA                      |
| NA | NA     | NA    | NA | NA  | NA | NA                      |
| Y  | 40 MG  | DAILY |    | 80  | 2  | 0.71428571 Low          |
| NA | NA     | NA    | NA | NA  | NA | NA                      |
| Y  | 80 MG  | STAT  |    | 80  | 1  | 1.02564103 Intermediate |
| Y  | 30 MG  | Q12H  |    | 240 | 8  | 0.7904097 Low           |
| NA | NA     | NA    | NA | NA  | NA | NA                      |
| NA | NA     | NA    | NA | NA  | NA | NA                      |
| NA | NA     | NA    | NA | NA  | NA | NA                      |
| NA | NA     | NA    | NA | NA  | NA | NA                      |
| NA | NA     | NA    | NA | NA  | NA | NA                      |
| NA | NA     | NA    | NA | NA  | NA | NA                      |
| Y  | 40 MG  | Q12HR |    | 200 | 5  | 0.65183737 Low          |
| NA | NA     | NA    | NA | NA  | NA | NA                      |

|    |        |       |    |     |    |                         |
|----|--------|-------|----|-----|----|-------------------------|
| NA | NA     | NA    | NA | NA  | NA | NA                      |
| NA | NA     | NA    | NA | NA  | NA | NA                      |
| Y  | 40 MG  | DAILY |    | 480 | 12 | 0.41016386 Low          |
| Y  | 40 MG  | Q24H  |    | 160 | 4  | 0.36666972 Low          |
| NA | NA     | NA    | NA | NA  | NA | NA                      |
| Y  | 40 MG  | DAILY |    | 80  | 2  | 0.8148299 Low           |
| NA | NA     | NA    | NA | NA  | NA | NA                      |
| NA | NA     | NA    | NA | NA  | NA | NA                      |
| NA | NA     | NA    | NA | NA  | NA | NA                      |
| Y  | 40 MG  | DAILY |    | 280 | 7  | 0.6298915 Low           |
| Y  | 40 MG  | DAILY |    | 120 | 3  | 0.625 Low               |
| NA | NA     | NA    | NA | NA  | NA | NA                      |
| Y  | 40 MG  | BID   |    | 80  | 2  | 1.04849279 Intermediate |
| NA | NA     | NA    | NA | NA  | NA | NA                      |
| Y  | 20 MG  | DAILY |    | 60  | 3  | 0.22268987 Low          |
| NA | NA     | NA    | NA | NA  | NA | NA                      |
| NA | NA     | NA    | NA | NA  | NA | NA                      |
| Y  | 100 MG | STAT  |    | 100 | 1  | 1.44927536 Intermediate |
| NA | NA     | NA    | NA | NA  | NA | NA                      |
| NA | NA     | NA    | NA | NA  | NA | NA                      |
| NA | NA     | NA    | NA | NA  | NA | NA                      |
| Y  | 40 MG  | DAILY |    | 200 | 5  | 0.48887802 Low          |
| Y  | 40 MG  | Q24H  |    | 120 | 3  | 0.4092909 Low           |
| NA | NA     | NA    | NA | NA  | NA | NA                      |
| Y  | 40 MG  | Q24H  |    | 80  | 2  | 0.48887802 Low          |
| NA | NA     | NA    | NA | NA  | NA | NA                      |
| NA | NA     | NA    | NA | NA  | NA | NA                      |
| NA | NA     | NA    | NA | NA  | NA | NA                      |
| NA | NA     | NA    | NA | NA  | NA | NA                      |
| NA | NA     | NA    | NA | NA  | NA | NA                      |
| NA | NA     | NA    | NA | NA  | NA | NA                      |
| NA | NA     | NA    | NA | NA  | NA | NA                      |
| NA | NA     | NA    | NA | NA  | NA | NA                      |
| NA | NA     | NA    | NA | NA  | NA | NA                      |
| NA | NA     | NA    | NA | NA  | NA | NA                      |
| NA | NA     | NA    | NA | NA  | NA | NA                      |
| NA | NA     | NA    | NA | NA  | NA | NA                      |
| Y  | 60 MG  | Q12H  |    | 120 | 2  | 2.08311634 Therapeutic  |
| Y  | 40 MG  | DAILY |    | 440 | 11 | 0.48887802 Low          |
| NA | NA     | NA    | NA | NA  | NA | NA                      |
| Y  | 100 MG | Q12H  |    | 900 | 9  | 1.84877057 Therapeutic  |
| Y  | 120 MG | BID   |    | 600 | 5  | 1.88575469 Therapeutic  |
| NA | NA     | NA    | NA | NA  | NA | NA                      |
| NA | NA     | NA    | NA | NA  | NA | NA                      |
| NA | NA     | NA    | NA | NA  | NA | NA                      |

|    |        |       |    |     |    |            |             |
|----|--------|-------|----|-----|----|------------|-------------|
| Y  | 40 MG  | DAILY |    | 200 | 5  | 0.58668231 | Low         |
| Y  | 40 MG  | DAILY |    | 80  | 2  | 0.55348001 | Low         |
| NA | NA     | NA    | NA | NA  | NA | NA         | NA          |
| NA | NA     | NA    | NA | NA  | NA | NA         | NA          |
| NA | NA     | NA    | NA | NA  | NA | NA         | NA          |
| NA | NA     | NA    | NA | NA  | NA | NA         | NA          |
| NA | NA     | NA    | NA | NA  | NA | NA         | NA          |
| NA | NA     | NA    | NA | NA  | NA | NA         | NA          |
| Y  | 100 MG | BID   |    | 800 | 8  | 1.84877057 | Therapeutic |
| NA | NA     | NA    | NA | NA  | NA | NA         | NA          |
| NA | NA     | NA    | NA | NA  | NA | NA         | NA          |
| NA | NA     | NA    | NA | NA  | NA | NA         | NA          |
| NA | NA     | NA    | NA | NA  | NA | NA         | NA          |
| NA | NA     | NA    | NA | NA  | NA | NA         | NA          |
| NA | NA     | NA    | NA | NA  | NA | NA         | NA          |
| NA | NA     | NA    | NA | NA  | NA | NA         | NA          |
| Y  | 70 MG  | BID   |    | 700 | 10 | 1.92492782 | Therapeutic |
| Y  | 30 MG  | Q24H  |    | 270 | 9  | 0.73487985 | Low         |
| NA | NA     | NA    | NA | NA  | NA | NA         | NA          |
| Y  | 30 MG  | DAILY |    | 90  | 3  | 0.69620106 | Low         |
| NA | NA     | NA    | NA | NA  | NA | NA         | NA          |
| NA | NA     | NA    | NA | NA  | NA | NA         | NA          |
| Y  | 40 MG  | BID   |    | 320 | 8  | 0.73333944 | Low         |
| NA | NA     | NA    | NA | NA  | NA | NA         | NA          |
| Y  | 40 MG  | Q24H  |    | 40  | 1  | 0.4        | Low         |
| Y  | 60 MG  | BID   |    | 480 | 8  | 1.8896745  | Therapeutic |
| Y  | 40 MG  | DAILY |    | 440 | 11 | 0.70921986 | Low         |
| NA | NA     | NA    | NA | NA  | NA | NA         | NA          |
| Y  | 40 MG  | DAILY |    | 120 | 3  | 0.58668231 | Low         |
| Y  | 40 MG  | DAILY |    | 200 | 5  | 0.60277275 | Low         |
| NA | NA     | NA    | NA | NA  | NA | NA         | NA          |
| NA | NA     | NA    | NA | NA  | NA | NA         | NA          |
| NA | NA     | NA    | NA | NA  | NA | NA         | NA          |
| NA | NA     | NA    | NA | NA  | NA | NA         | NA          |
| Y  | 40 MG  | Q12H  |    | 200 | 5  | 0.59661421 | Low         |
| NA | NA     | NA    | NA | NA  | NA | NA         | NA          |
| NA | NA     | NA    | NA | NA  | NA | NA         | NA          |
| NA | NA     | NA    | NA | NA  | NA | NA         | NA          |
| NA | NA     | NA    | NA | NA  | NA | NA         | NA          |
| NA | NA     | NA    | NA | NA  | NA | NA         | NA          |
| NA | NA     | NA    | NA | NA  | NA | NA         | NA          |
| NA | NA     | NA    | NA | NA  | NA | NA         | NA          |
| Y  | 40 MG  | DAILY |    | 200 | 5  | 0.37878788 | Low         |

|    |       |       |    |      |               |             |
|----|-------|-------|----|------|---------------|-------------|
| NA | NA    | NA    | NA | NA   | NA            | NA          |
| Y  | 40 MG | DAILY |    | 40   | 1 0.46838407  | Low         |
| NA | NA    | NA    | NA | NA   | NA            | NA          |
| NA | NA    | NA    | NA | NA   | NA            | NA          |
| NA | NA    | NA    | NA | NA   | NA            | NA          |
| NA | NA    | NA    | NA | NA   | NA            | NA          |
| NA | NA    | NA    | NA | NA   | NA            | NA          |
| NA | NA    | NA    | NA | NA   | NA            | NA          |
| NA | NA    | NA    | NA | NA   | NA            | NA          |
| Y  | 40 MG | DAILY |    | 280  | 7 0.53333333  | Low         |
| NA | NA    | NA    | NA | NA   | NA            | NA          |
| NA | NA    | NA    | NA | NA   | NA            | NA          |
| NA | NA    | NA    | NA | NA   | NA            | NA          |
| Y  | 40 MG | Q24H  |    | 40   | 1 0.39112154  | Low         |
| Y  | 40 MG | DAILY |    | 120  | 3 0.51873274  | Low         |
| NA | NA    | NA    | NA | NA   | NA            | NA          |
| NA | NA    | NA    | NA | NA   | NA            | NA          |
| Y  | 40 MG | Q24H  |    | 640  | 16 0.60688818 | Low         |
| NA | NA    | NA    | NA | NA   | NA            | NA          |
| NA | NA    | NA    | NA | NA   | NA            | NA          |
| Y  | 80 MG | Q12H  |    | 1120 | 14 2.13333333 | Therapeutic |
| NA | NA    | NA    | NA | NA   | NA            | NA          |
| NA | NA    | NA    | NA | NA   | NA            | NA          |
| NA | NA    | NA    | NA | NA   | NA            | NA          |
| Y  | 40 MG | Q24H  |    | 40   | 1 0.49382716  | Low         |
| NA | NA    | NA    | NA | NA   | NA            | NA          |
| NA | NA    | NA    | NA | NA   | NA            | NA          |
| Y  | 40 MG | Q24H  |    | 120  | 3 0.61538462  | Low         |
| NA | NA    | NA    | NA | NA   | NA            | NA          |
| NA | NA    | NA    | NA | NA   | NA            | NA          |
| Y  | 40 MG | DAILY |    | 200  | 5 0.48192771  | Low         |
| Y  | 90 MG | Q12H  |    | 1710 | 19 2.22772277 | Therapeutic |
| NA | NA    | NA    | NA | NA   | NA            | NA          |
| NA | NA    | NA    | NA | NA   | NA            | NA          |
| NA | NA    | NA    | NA | NA   | NA            | NA          |
| NA | NA    | NA    | NA | NA   | NA            | NA          |
| Y  | 40 MG | DAILY |    | 280  | 7 0.58668231  | Low         |
| NA | NA    | NA    | NA | NA   | NA            | NA          |
| NA | NA    | NA    | NA | NA   | NA            | NA          |
| NA | NA    | NA    | NA | NA   | NA            | NA          |
| Y  | 40 MG | Q24H  |    | 840  | 21 0.58668231 | Low         |
| NA | NA    | NA    | NA | NA   | NA            | NA          |



|    |        |       |    |     |    |                         |
|----|--------|-------|----|-----|----|-------------------------|
| NA | NA     | NA    | NA | NA  | NA | NA                      |
| NA | NA     | NA    | NA | NA  | NA | NA                      |
| NA | NA     | NA    | NA | NA  | NA | NA                      |
| NA | NA     | NA    | NA | NA  | NA | NA                      |
| NA | NA     | NA    | NA | NA  | NA | NA                      |
| NA | NA     | NA    | NA | NA  | NA | NA                      |
| NA | NA     | NA    | NA | NA  | NA | NA                      |
| Y  | 40 MG  | DAILY |    | 360 | 9  | 0.47568082 Low          |
| Y  | 40 MG  | DAILY |    | 160 | 4  | 0.45977011 Low          |
| Y  | 73 MG  | STAT  |    | 73  | 1  | 1.00585601 Intermediate |
| NA | NA     | NA    | NA | NA  | NA | NA                      |
| NA | NA     | NA    | NA | NA  | NA | NA                      |
| NA | NA     | NA    | NA | NA  | NA | NA                      |
| NA | NA     | NA    | NA | NA  | NA | NA                      |
| Y  | 40 MG  | DAILY |    | 240 | 6  | 0.4631774 Low           |
| NA | NA     | NA    | NA | NA  | NA | NA                      |
| Y  | 80 MG  | BID   |    | 80  | 1  | 1.85185185 Therapeutic  |
| NA | NA     | NA    | NA | NA  | NA | NA                      |
| NA | NA     | NA    | NA | NA  | NA | NA                      |
| NA | NA     | NA    | NA | NA  | NA | NA                      |
| Y  | 120 MG | STAT  |    | 120 | 1  | 0.97775605 Low          |
| Y  | 40 MG  | DAILY |    | 120 | 3  | 0.3591954 Low           |
| NA | NA     | NA    | NA | NA  | NA | NA                      |
| NA | NA     | NA    | NA | NA  | NA | NA                      |
| Y  | 40 MG  | DAILY |    | 280 | 7  | 0.4 Low                 |
| NA | NA     | NA    | NA | NA  | NA | NA                      |
| NA | NA     | NA    | NA | NA  | NA | NA                      |
| NA | NA     | NA    | NA | NA  | NA | NA                      |
| NA | NA     | NA    | NA | NA  | NA | NA                      |
| Y  | 30 MG  | DAILY |    | 60  | 2  | 0.26939655 Low          |
| Y  | 100 MG | Q12H  |    | 300 | 3  | 1.92307692 Therapeutic  |
| Y  | 100 MG | Q12H  |    | 300 | 3  | 1.92307692 Therapeutic  |
| NA | NA     | NA    | NA | NA  | NA | NA                      |
| Y  | 40 MG  | Q24H  |    | 40  | 1  | 0.4631774 Low           |
| NA | NA     | NA    | NA | NA  | NA | NA                      |
| NA | NA     | NA    | NA | NA  | NA | NA                      |
| Y  | 30 MG  | Q24H  |    | 30  | 1  | 0.6 Low                 |
| NA | NA     | NA    | NA | NA  | NA | NA                      |
| NA | NA     | NA    | NA | NA  | NA | NA                      |
| NA | NA     | NA    | NA | NA  | NA | NA                      |
| NA | NA     | NA    | NA | NA  | NA | NA                      |
| Y  | 40 MG  | DAILY |    | 40  | 1  | 0.49720323 Low          |

|    |       |       |    |      |    |                         |
|----|-------|-------|----|------|----|-------------------------|
| NA | NA    | NA    | NA | NA   | NA | NA                      |
| NA | NA    | NA    | NA | NA   | NA | NA                      |
| Y  | 40 MG | Q24H  |    | 200  | 5  | 0.48887802 Low          |
| Y  | 40 MG | DAILY |    | 200  | 5  | 0.48887802 Low          |
| NA | NA    | NA    | NA | NA   | NA | NA                      |
| NA | NA    | NA    | NA | NA   | NA | NA                      |
| NA | NA    | NA    | NA | NA   | NA | NA                      |
| NA | NA    | NA    | NA | NA   | NA | NA                      |
| Y  | 40 MG | DAILY |    | 80   | 2  | 0.73327223 Low          |
| Y  | 40 MG | DAILY |    | 40   | 1  | 0.67834552 Low          |
| NA | NA    | NA    | NA | NA   | NA | NA                      |
| NA | NA    | NA    | NA | NA   | NA | NA                      |
| NA | NA    | NA    | NA | NA   | NA | NA                      |
| NA | NA    | NA    | NA | NA   | NA | NA                      |
| NA | NA    | NA    | NA | NA   | NA | NA                      |
| NA | NA    | NA    | NA | NA   | NA | NA                      |
| NA | NA    | NA    | NA | NA   | NA | NA                      |
| NA | NA    | NA    | NA | NA   | NA | NA                      |
| Y  | 90 MG | DAILY |    | 180  | 2  | 1.03926097 Intermediate |
| NA | NA    | NA    | NA | NA   | NA | NA                      |
| NA | NA    | NA    | NA | NA   | NA | NA                      |
| NA | NA    | NA    | NA | NA   | NA | NA                      |
| Y  | 40 MG | DAILY |    | 320  | 8  | 0.50282841 Low          |
| NA | NA    | NA    | NA | NA   | NA | NA                      |
| NA | NA    | NA    | NA | NA   | NA | NA                      |
| NA | NA    | NA    | NA | NA   | NA | NA                      |
| NA | NA    | NA    | NA | NA   | NA | NA                      |
| Y  | 40 MG | Q24H  |    | 280  | 7  | 0.67693349 Low          |
| NA | NA    | NA    | NA | NA   | NA | NA                      |
| NA | NA    | NA    | NA | NA   | NA | NA                      |
| NA | NA    | NA    | NA | NA   | NA | NA                      |
| Y  | 40 MG | Q12H  |    | 1360 | 34 | 0.4889079 Low           |
| NA | NA    | NA    | NA | NA   | NA | NA                      |
| NA | NA    | NA    | NA | NA   | NA | NA                      |
| NA | NA    | NA    | NA | NA   | NA | NA                      |
| Y  | 40 MG | DAILY |    | 240  | 6  | 0.38259206 Low          |
| NA | NA    | NA    | NA | NA   | NA | NA                      |
| Y  | 40 MG | DAILY |    | 320  | 8  | 0.60688818 Low          |
| Y  | 40 MG | DAILY |    | 120  | 3  | 0.46136101 Low          |
| NA | NA    | NA    | NA | NA   | NA | NA                      |
| NA | NA    | NA    | NA | NA   | NA | NA                      |
| NA | NA    | NA    | NA | NA   | NA | NA                      |
| Y  | 40 MG | DAILY |    | 120  | 3  | 0.67693349 Low          |
| NA | NA    | NA    | NA | NA   | NA | NA                      |

|    |       |        |    |      |    |                         |
|----|-------|--------|----|------|----|-------------------------|
| NA | NA    | NA     | NA | NA   | NA | NA                      |
| Y  | 40 MG | DAILY  |    | 160  | 4  | 0.67693349 Low          |
| NA | NA    | NA     | NA | NA   | NA | NA                      |
| Y  | 60 MG | STAT   |    | 60   | 1  | 0.91225616 Low          |
| NA | NA    | NA     | NA | NA   | NA | NA                      |
| NA | NA    | NA     | NA | NA   | NA | NA                      |
| Y  | 40 MG | QHS    |    | 320  | 8  | 0.52383447 Low          |
| Y  | 40 MG | DAILY  |    | 200  | 5  | 0.50396875 Low          |
| NA | NA    | NA     | NA | NA   | NA | NA                      |
| Y  | 40 MG | Q24H   |    | 120  | 3  | 0.41906757 Low          |
| NA | NA    | NA     | NA | NA   | NA | NA                      |
| NA | NA    | NA     | NA | NA   | NA | NA                      |
| NA | NA    | NA     | NA | NA   | NA | NA                      |
| Y  | 70 MG | STAT   |    | 70   | 1  | 0.96246391 Low          |
| NA | NA    | NA     | NA | NA   | NA | NA                      |
| Y  | 40 MG | DAILY  |    | 160  | 4  | 0.4399956 Low           |
| Y  | 73 MG | STAT   |    | 73   | 1  | 1.00585601 Intermediate |
| NA | NA    | NA     | NA | NA   | NA | NA                      |
| Y  | 40 MG | DAILY  |    | 200  | 5  | 0.36666972 Low          |
| NA | NA    | NA     | NA | NA   | NA | NA                      |
| Y  | 40 MG | DAILY  |    | 160  | 4  | 0.68317677 Low          |
| NA | NA    | NA     | NA | NA   | NA | NA                      |
| Y  | 40 MG | DAILY  |    | 320  | 8  | 0.4 Low                 |
| NA | NA    | NA     | NA | NA   | NA | NA                      |
| NA | NA    | NA     | NA | NA   | NA | NA                      |
| NA | NA    | NA     | NA | NA   | NA | NA                      |
| NA | NA    | NA     | NA | NA   | NA | NA                      |
| Y  | 40 MG | DAILY  |    | 40   | 1  | 0.49382716 Low          |
| Y  | 40 MG | DAILY  |    | 600  | 15 | 0.91533181 Low          |
| NA | NA    | NA     | NA | NA   | NA | NA                      |
| NA | NA    | NA     | NA | NA   | NA | NA                      |
| Y  | 90 MG | Q12H 8 |    | 1620 | 18 | 1.9799802 Therapeutic   |
| NA | NA    | NA     | NA | NA   | NA | NA                      |
| Y  | 40 MG | DAILY  |    | 400  | 10 | 0.49382716 Low          |
| NA | NA    | NA     | NA | NA   | NA | NA                      |
| NA | NA    | NA     | NA | NA   | NA | NA                      |
| NA | NA    | NA     | NA | NA   | NA | NA                      |
| NA | NA    | NA     | NA | NA   | NA | NA                      |
| Y  | 80 MG | QHS    |    | 160  | 2  | 1.03533066 Intermediate |
| NA | NA    | NA     | NA | NA   | NA | NA                      |
| NA | NA    | NA     | NA | NA   | NA | NA                      |
| Y  | 30 MG | DAILY  |    | 120  | 4  | 0.60126265 Low          |
| NA | NA    | NA     | NA | NA   | NA | NA                      |
| Y  | 40 MG | DAILY  |    | 360  | 9  | 0.58823529 Low          |

|    |       |       |    |      |    |                        |
|----|-------|-------|----|------|----|------------------------|
| NA | NA    | NA    | NA | NA   | NA | NA                     |
| NA | NA    | NA    | NA | NA   | NA | NA                     |
| NA | NA    | NA    | NA | NA   | NA | NA                     |
| NA | NA    | NA    | NA | NA   | NA | NA                     |
| NA | NA    | NA    | NA | NA   | NA | NA                     |
| NA | NA    | NA    | NA | NA   | NA | NA                     |
| Y  | 40 MG | Q12H  |    | 120  | 3  | 0.99649979 Low         |
| NA | NA    | NA    | NA | NA   | NA | NA                     |
| Y  | 40 MG | Q24H  |    | 520  | 13 | 0.65189048 Low         |
| Y  | 40 MG | DAILY |    | 40   | 1  | 0.73327223 Low         |
| Y  | 40 MG | DAILY |    | 40   | 1  | 0.48453134 Low         |
| Y  | 40 MG | DAILY |    | 160  | 4  | 0.68894247 Low         |
| Y  | 40 MG | DAILY |    | 200  | 5  | 0.73487535 Low         |
| Y  | 40 MG | Q24H  |    | 240  | 6  | 0.73327223 Low         |
| NA | NA    | NA    | NA | NA   | NA | NA                     |
| NA | NA    | NA    | NA | NA   | NA | NA                     |
| NA | NA    | NA    | NA | NA   | NA | NA                     |
| Y  | 40 MG | DAILY |    | 200  | 5  | 0.30344409 Low         |
| Y  | 40 MG | Q12HR |    | 200  | 5  | 0.6415397 Low          |
| NA | NA    | NA    | NA | NA   | NA | NA                     |
| Y  | 40 MG | Q24H  |    | 240  | 6  | 0.45045045 Low         |
| Y  | 40 MG | DAILY |    | 120  | 3  | 0.3087611 Low          |
| NA | NA    | NA    | NA | NA   | NA | NA                     |
| NA | NA    | NA    | NA | NA   | NA | NA                     |
| NA | NA    | NA    | NA | NA   | NA | NA                     |
| Y  | 30 MG | DAILY |    | 240  | 8  | 0.41771094 Low         |
| Y  | 30 MG | DAILY |    | 330  | 11 | 0.58927519 Low         |
| NA | NA    | NA    | NA | NA   | NA | NA                     |
| NA | NA    | NA    | NA | NA   | NA | NA                     |
| NA | NA    | NA    | NA | NA   | NA | NA                     |
| NA | NA    | NA    | NA | NA   | NA | NA                     |
| NA | NA    | NA    | NA | NA   | NA | NA                     |
| NA | NA    | NA    | NA | NA   | NA | NA                     |
| NA | NA    | NA    | NA | NA   | NA | NA                     |
| NA | NA    | NA    | NA | NA   | NA | NA                     |
| Y  | 40 MG | DAILY |    | 120  | 3  | 0.4899559 Low          |
| Y  | 40 MG | DAILY |    | 400  | 10 | 0.57142857 Low         |
| NA | NA    | NA    | NA | NA   | NA | NA                     |
| NA | NA    | NA    | NA | NA   | NA | NA                     |
| NA | NA    | NA    | NA | NA   | NA | NA                     |
| Y  | 40 MG | DAILY |    | 200  | 5  | 0.4899139 Low          |
| Y  | 40 MG | DAILY |    | 240  | 6  | 0.4399956 Low          |
| Y  | 40 MG | DAILY |    | 160  | 4  | 0.52069773 Low         |
| NA | NA    | NA    | NA | NA   | NA | NA                     |
| Y  | 90 MG | BID   |    | 2250 | 25 | 1.88580409 Therapeutic |

|    |        |       |    |      |    |                         |
|----|--------|-------|----|------|----|-------------------------|
| NA | NA     | NA    | NA | NA   | NA | NA                      |
| NA | NA     | NA    | NA | NA   | NA | NA                      |
| NA | NA     | NA    | NA | NA   | NA | NA                      |
| Y  | 40 MG  | DAILY |    | 280  | 7  | 0.69844596 Low          |
| NA | NA     | NA    | NA | NA   | NA | NA                      |
| NA | NA     | NA    | NA | NA   | NA | NA                      |
| Y  | 40 MG  | DAILY |    | 720  | 18 | 0.46412866 Low          |
| NA | NA     | NA    | NA | NA   | NA | NA                      |
| Y  | 40 MG  | DAILY |    | 400  | 10 | 0.50282841 Low          |
| NA | NA     | NA    | NA | NA   | NA | NA                      |
| Y  | 40 MG  | DAILY |    | 280  | 7  | 0.62992126 Low          |
| Y  | 40 MG  | Q24H  |    | 280  | 7  | 0.70397747 Low          |
| Y  | 40 MG  | DAILY |    | 360  | 9  | 0.51873274 Low          |
| NA | NA     | NA    | NA | NA   | NA | NA                      |
| Y  | 40 MG  | DAILY |    | 320  | 8  | 0.47568082 Low          |
| Y  | 40 MG  | DAILY |    | 80   | 2  | 0.38259206 Low          |
| NA | NA     | NA    | NA | NA   | NA | NA                      |
| Y  | 70 MG  | Q12H  |    | 280  | 4  | 1.9170729 Therapeutic   |
| NA | NA     | NA    | NA | NA   | NA | NA                      |
| NA | NA     | NA    | NA | NA   | NA | NA                      |
| NA | NA     | NA    | NA | NA   | NA | NA                      |
| NA | NA     | NA    | NA | NA   | NA | NA                      |
| NA | NA     | NA    | NA | NA   | NA | NA                      |
| Y  | 40 MG  | Q12HR |    | 120  | 3  | 1.06666667 Intermediate |
| Y  | 100 MG | Q12H  |    | 1600 | 16 | 2.10526316 Therapeutic  |
| Y  | 90 MG  | STAT  |    | 90   | 1  | 1.01534296 Intermediate |
| NA | NA     | NA    | NA | NA   | NA | NA                      |
| NA | NA     | NA    | NA | NA   | NA | NA                      |
| NA | NA     | NA    | NA | NA   | NA | NA                      |
| NA | NA     | NA    | NA | NA   | NA | NA                      |
| NA | NA     | NA    | NA | NA   | NA | NA                      |
| NA | NA     | NA    | NA | NA   | NA | NA                      |
| Y  | 40 MG  | DAILY |    | 120  | 3  | 0.4092909 Low           |
| NA | NA     | NA    | NA | NA   | NA | NA                      |
| NA | NA     | NA    | NA | NA   | NA | NA                      |
| NA | NA     | NA    | NA | NA   | NA | NA                      |
| NA | NA     | NA    | NA | NA   | NA | NA                      |
| NA | NA     | NA    | NA | NA   | NA | NA                      |
| Y  | 40 MG  | DAILY |    | 360  | 9  | 0.65670662 Low          |
| NA | NA     | NA    | NA | NA   | NA | NA                      |
| NA | NA     | NA    | NA | NA   | NA | NA                      |
| NA | NA     | NA    | NA | NA   | NA | NA                      |
| NA | NA     | NA    | NA | NA   | NA | NA                      |
| Y  | 40 MG  | DAILY |    | 240  | 6  | 0.62853551 Low          |
| NA | NA     | NA    | NA | NA   | NA | NA                      |

|    |        |       |    |     |    |                        |
|----|--------|-------|----|-----|----|------------------------|
| NA | NA     | NA    | NA | NA  | NA | NA                     |
| NA | NA     | NA    | NA | NA  | NA | NA                     |
| NA | NA     | NA    | NA | NA  | NA | NA                     |
| Y  | 70 MG  | STAT  |    | 70  | 1  | 0.96952909 Low         |
| NA | NA     | NA    | NA | NA  | NA | NA                     |
| NA | NA     | NA    | NA | NA  | NA | NA                     |
| Y  | 40 MG  | Q24H  |    | 160 | 4  | 0.44092683 Low         |
| NA | NA     | NA    | NA | NA  | NA | NA                     |
| NA | NA     | NA    | NA | NA  | NA | NA                     |
| NA | NA     | NA    | NA | NA  | NA | NA                     |
| NA | NA     | NA    | NA | NA  | NA | NA                     |
| Y  | 40 MG  | DAILY |    | 160 | 4  | 0.58668231 Low         |
| Y  | 30 MG  | BID   |    | 180 | 6  | 0.94488189 Low         |
| Y  | 40 MG  | Q24H  |    | 600 | 15 | 0.52631579 Low         |
| NA | NA     | NA    | NA | NA  | NA | NA                     |
| NA | NA     | NA    | NA | NA  | NA | NA                     |
| NA | NA     | NA    | NA | NA  | NA | NA                     |
| Y  | 40 MG  | DAILY |    | 200 | 5  | 0.48088483 Low         |
| NA | NA     | NA    | NA | NA  | NA | NA                     |
| NA | NA     | NA    | NA | NA  | NA | NA                     |
| NA | NA     | NA    | NA | NA  | NA | NA                     |
| NA | NA     | NA    | NA | NA  | NA | NA                     |
| NA | NA     | NA    | NA | NA  | NA | NA                     |
| Y  | 40 MG  | DAILY |    | 640 | 16 | 0.78737058 Low         |
| Y  | 100 MG | Q12H  |    | 500 | 5  | 1.88857413 Therapeutic |
| NA | NA     | NA    | NA | NA  | NA | NA                     |
| NA | NA     | NA    | NA | NA  | NA | NA                     |
| NA | NA     | NA    | NA | NA  | NA | NA                     |
| NA | NA     | NA    | NA | NA  | NA | NA                     |
| Y  | 30 MG  | Q24H  |    | 30  | 1  | 0.464756 Low           |
| NA | NA     | NA    | NA | NA  | NA | NA                     |
| NA | NA     | NA    | NA | NA  | NA | NA                     |
| NA | NA     | NA    | NA | NA  | NA | NA                     |
| Y  | 40 MG  | DAILY |    | 160 | 4  | 0.4899139 Low          |
| NA | NA     | NA    | NA | NA  | NA | NA                     |
| NA | NA     | NA    | NA | NA  | NA | NA                     |
| NA | NA     | NA    | NA | NA  | NA | NA                     |
| Y  | 40 MG  | Q24H  |    | 160 | 4  | 0.53333333 Low         |
| NA | NA     | NA    | NA | NA  | NA | NA                     |
| Y  | 40 MG  | DAILY |    | 160 | 4  | 0.27557699 Low         |
| NA | NA     | NA    | NA | NA  | NA | NA                     |
| NA | NA     | NA    | NA | NA  | NA | NA                     |
| NA | NA     | NA    | NA | NA  | NA | NA                     |
| NA | NA     | NA    | NA | NA  | NA | NA                     |
| NA | NA     | NA    | NA | NA  | NA | NA                     |

|    |        |       |    |     |    |                         |
|----|--------|-------|----|-----|----|-------------------------|
| NA | NA     | NA    | NA | NA  | NA | NA                      |
| NA | NA     | NA    | NA | NA  | NA | NA                      |
| NA | NA     | NA    | NA | NA  | NA | NA                      |
| NA | NA     | NA    | NA | NA  | NA | NA                      |
| NA | NA     | NA    | NA | NA  | NA | NA                      |
| NA | NA     | NA    | NA | NA  | NA | NA                      |
| NA | NA     | NA    | NA | NA  | NA | NA                      |
| NA | NA     | NA    | NA | NA  | NA | NA                      |
| Y  | 40 MG  | Q24H  |    | 280 | 7  | 0.50282841 Low          |
| NA | NA     | NA    | NA | NA  | NA | NA                      |
| NA | NA     | NA    | NA | NA  | NA | NA                      |
| NA | NA     | NA    | NA | NA  | NA | NA                      |
| Y  | 40 MG  | Q24H  |    | 40  | 1  | 0.53445212 Low          |
| NA | NA     | NA    | NA | NA  | NA | NA                      |
| NA | NA     | NA    | NA | NA  | NA | NA                      |
| NA | NA     | NA    | NA | NA  | NA | NA                      |
| NA | NA     | NA    | NA | NA  | NA | NA                      |
| NA | NA     | NA    | NA | NA  | NA | NA                      |
| NA | NA     | NA    | NA | NA  | NA | NA                      |
| NA | NA     | NA    | NA | NA  | NA | NA                      |
| NA | NA     | NA    | NA | NA  | NA | NA                      |
| NA | NA     | NA    | NA | NA  | NA | NA                      |
| NA | NA     | NA    | NA | NA  | NA | NA                      |
| NA | NA     | NA    | NA | NA  | NA | NA                      |
| NA | NA     | NA    | NA | NA  | NA | NA                      |
| NA | NA     | NA    | NA | NA  | NA | NA                      |
| NA | NA     | NA    | NA | NA  | NA | NA                      |
| NA | NA     | NA    | NA | NA  | NA | NA                      |
| Y  | 40 MG  | QHS   |    | 520 | 13 | 0.54997938 Low          |
| NA | NA     | NA    | NA | NA  | NA | NA                      |
| NA | NA     | NA    | NA | NA  | NA | NA                      |
| Y  | 40 MG  | Q24H  |    | 160 | 4  | 0.50282841 Low          |
| NA | NA     | NA    | NA | NA  | NA | NA                      |
| Y  | 40 MG  | BID   |    | 80  | 2  | 1.08108108 Intermediate |
| NA | NA     | NA    | NA | NA  | NA | NA                      |
| NA | NA     | NA    | NA | NA  | NA | NA                      |
| Y  | 40 MG  | DAILY |    | 360 | 9  | 0.48780488 Low          |
| Y  | 40 MG  | DAILY |    | 160 | 4  | 0.38259206 Low          |
| NA | NA     | NA    | NA | NA  | NA | NA                      |
| NA | NA     | NA    | NA | NA  | NA | NA                      |
| Y  | 120 MG | STAT  |    | 120 | 1  | 1.45808019 Intermediate |
| NA | NA     | NA    | NA | NA  | NA | NA                      |
| NA | NA     | NA    | NA | NA  | NA | NA                      |
| Y  | 40 MG  | Q24H  |    | 120 | 3  | 0.51873274 Low          |





|    |       |       |    |     |              |             |
|----|-------|-------|----|-----|--------------|-------------|
| NA | NA    | NA    | NA | NA  | NA           | NA          |
| Y  | 40 MG | Q24H  |    | 120 | 3 0.51766533 | Low         |
| Y  | 40 MG | Q24H  |    | 240 | 6 0.68917988 | Low         |
| NA | NA    | NA    | NA | NA  | NA           | NA          |
| NA | NA    | NA    | NA | NA  | NA           | NA          |
| NA | NA    | NA    | NA | NA  | NA           | NA          |
| Y  | 60 MG | Q12H  |    | 120 | 2 2.02360877 | Therapeutic |
| Y  | 40 MG | DAILY |    | 160 | 4 0.47568082 | Low         |
| Y  | 40 MG | DAILY |    | 40  | 1 0.51766533 | Low         |
| Y  | 40 MG | DAILY |    | 80  | 2 0.51880674 | Low         |
| Y  | 40 MG | DAILY |    | 160 | 4 0.4        | Low         |
| NA | NA    | NA    | NA | NA  | NA           | NA          |
| NA | NA    | NA    | NA | NA  | NA           | NA          |
| Y  | 40 MG | DAILY |    | 120 | 3 0.54318305 | Low         |
| NA | NA    | NA    | NA | NA  | NA           | NA          |
| NA | NA    | NA    | NA | NA  | NA           | NA          |
| NA | NA    | NA    | NA | NA  | NA           | NA          |
| NA | NA    | NA    | NA | NA  | NA           | NA          |
| NA | NA    | NA    | NA | NA  | NA           | NA          |
| NA | NA    | NA    | NA | NA  | NA           | NA          |
| NA | NA    | NA    | NA | NA  | NA           | NA          |
| Y  | 40 MG | DAILY |    | 240 | 6 0.44092683 | Low         |
| Y  | 40 MG | DAILY |    | 280 | 7 0.51766533 | Low         |
| NA | NA    | NA    | NA | NA  | NA           | NA          |
| NA | NA    | NA    | NA | NA  | NA           | NA          |
| NA | NA    | NA    | NA | NA  | NA           | NA          |
| NA | NA    | NA    | NA | NA  | NA           | NA          |
| Y  | 40 MG | DAILY |    | 80  | 2 0.61312078 | Low         |
| NA | NA    | NA    | NA | NA  | NA           | NA          |
| NA | NA    | NA    | NA | NA  | NA           | NA          |
| Y  | 40 MG | DAILY |    | 160 | 4 0.58823529 | Low         |
| NA | NA    | NA    | NA | NA  | NA           | NA          |
| NA | NA    | NA    | NA | NA  | NA           | NA          |
| NA | NA    | NA    | NA | NA  | NA           | NA          |
| NA | NA    | NA    | NA | NA  | NA           | NA          |
| NA | NA    | NA    | NA | NA  | NA           | NA          |
| NA | NA    | NA    | NA | NA  | NA           | NA          |
| Y  | 40 MG | DAILY |    | 160 | 4 0.48887802 | Low         |
| NA | NA    | NA    | NA | NA  | NA           | NA          |
| Y  | 40 MG | DAILY |    | 200 | 5 0.62853551 | Low         |
| NA | NA    | NA    | NA | NA  | NA           | NA          |
| NA | NA    | NA    | NA | NA  | NA           | NA          |
| NA | NA    | NA    | NA | NA  | NA           | NA          |
| NA | NA    | NA    | NA | NA  | NA           | NA          |

|    |       |       |    |      |    |                        |
|----|-------|-------|----|------|----|------------------------|
| NA | NA    | NA    | NA | NA   | NA | NA                     |
| NA | NA    | NA    | NA | NA   | NA | NA                     |
| NA | NA    | NA    | NA | NA   | NA | NA                     |
| NA | NA    | NA    | NA | NA   | NA | NA                     |
| NA | NA    | NA    | NA | NA   | NA | NA                     |
| Y  | 40 MG | Q24H  |    | 200  | 5  | 0.58668231 Low         |
| NA | NA    | NA    | NA | NA   | NA | NA                     |
| NA | NA    | NA    | NA | NA   | NA | NA                     |
| NA | NA    | NA    | NA | NA   | NA | NA                     |
| Y  | 40 MG | Q24H  |    | 320  | 8  | 0.4899139 Low          |
| Y  | 60 MG | Q12HR |    | 1860 | 31 | 1.88976378 Therapeutic |
| NA | NA    | NA    | NA | NA   | NA | NA                     |
| NA | NA    | NA    | NA | NA   | NA | NA                     |
| Y  | 40 MG | Q12H  |    | 320  | 8  | 0.6557377 Low          |
| NA | NA    | NA    | NA | NA   | NA | NA                     |
| NA | NA    | NA    | NA | NA   | NA | NA                     |
| NA | NA    | NA    | NA | NA   | NA | NA                     |
| Y  | 40 MG | Q24H  |    | 40   | 1  | 0.53333333 Low         |
| Y  | 40 MG | DAILY |    | 160  | 4  | 0.67693349 Low         |
| NA | NA    | NA    | NA | NA   | NA | NA                     |
| Y  | 40 MG | DAILY |    | 80   | 2  | 0.58668231 Low         |
| NA | NA    | NA    | NA | NA   | NA | NA                     |
| Y  | 40 MG | DAILY |    | 640  | 16 | 0.58668231 Low         |
| NA | NA    | NA    | NA | NA   | NA | NA                     |
| NA | NA    | NA    | NA | NA   | NA | NA                     |
| NA | NA    | NA    | NA | NA   | NA | NA                     |
| NA | NA    | NA    | NA | NA   | NA | NA                     |
| NA | NA    | NA    | NA | NA   | NA | NA                     |
| Y  | 80 MG | Q12H  |    | 160  | 2  | 2.18281037 Therapeutic |
| NA | NA    | NA    | NA | NA   | NA | NA                     |
| Y  | 90 MG | Q12H  |    | 180  | 2  | 1.94594595 Therapeutic |
| NA | NA    | NA    | NA | NA   | NA | NA                     |
| Y  | 40 MG | DAILY |    | 160  | 4  | 0.41972718 Low         |
| NA | NA    | NA    | NA | NA   | NA | NA                     |
| Y  | 30 MG | DAILY |    | 120  | 4  | 0.35676061 Low         |
| NA | NA    | NA    | NA | NA   | NA | NA                     |
| NA | NA    | NA    | NA | NA   | NA | NA                     |
| Y  | 85 MG | ONCE  |    | 85   | 1  | 0.99415205 Low         |
| NA | NA    | NA    | NA | NA   | NA | NA                     |
| NA | NA    | NA    | NA | NA   | NA | NA                     |
| Y  | 40 MG | Q24H  |    | 280  | 7  | 0.56899004 Low         |
| NA | NA    | NA    | NA | NA   | NA | NA                     |
| NA | NA    | NA    | NA | NA   | NA | NA                     |
| NA | NA    | NA    | NA | NA   | NA | NA                     |
| NA | NA    | NA    | NA | NA   | NA | NA                     |

|    |        |       |    |      |               |               |
|----|--------|-------|----|------|---------------|---------------|
| NA | NA     | NA    | NA | NA   | NA            | NA            |
| Y  | 40 MG  | Q24H  |    | 40   | 1 0.53988392  | Low           |
| Y  | 30 MG  | STAT  |    | 30   | 1 0.45836516  | Low           |
| NA | NA     | NA    | NA | NA   | NA            | NA            |
| Y  | 40 MG  | DAILY |    | 280  | 7 1.03519669  | Intermediate  |
| NA | NA     | NA    | NA | NA   | NA            | NA            |
| NA | NA     | NA    | NA | NA   | NA            | NA            |
| NA | NA     | NA    | NA | NA   | NA            | NA            |
| Y  | 40 MG  | DAILY |    | 600  | 15 0.67693349 | Low           |
| NA | NA     | NA    | NA | NA   | NA            | NA            |
| NA | NA     | NA    | NA | NA   | NA            | NA            |
| NA | NA     | NA    | NA | NA   | NA            | NA            |
| NA | NA     | NA    | NA | NA   | NA            | NA            |
| NA | NA     | NA    | NA | NA   | NA            | NA            |
| Y  | 40 MG  | DAILY |    | 120  | 3 0.51766533  | Low           |
| Y  | 30 MG  | DAILY |    | 30   | 1 0.37037037  | Low           |
| NA | NA     | NA    | NA | NA   | NA            | NA            |
| NA | NA     | NA    | NA | NA   | NA            | NA            |
| NA | NA     | NA    | NA | NA   | NA            | NA            |
| Y  | 90 MG  | Q12H  |    | 720  | 8             | 2 Therapeutic |
| NA | NA     | NA    | NA | NA   | NA            | NA            |
| NA | NA     | NA    | NA | NA   | NA            | NA            |
| Y  | 40 MG  | Q24H  |    | 360  | 9 0.6779661   | Low           |
| NA | NA     | NA    | NA | NA   | NA            | NA            |
| NA | NA     | NA    | NA | NA   | NA            | NA            |
| NA | NA     | NA    | NA | NA   | NA            | NA            |
| NA | NA     | NA    | NA | NA   | NA            | NA            |
| Y  | 100 MG | BID   |    | 1500 | 15 1.95966999 | Therapeutic   |
| NA | NA     | NA    | NA | NA   | NA            | NA            |
| Y  | 40 MG  | BID   |    | 440  | 11 0.60377358 | Low           |
| Y  | 40 MG  | Q24H  |    | 160  | 4 0.52631579  | Low           |
| Y  | 40 MG  | DAILY |    | 280  | 7 0.46658657  | Low           |
| Y  | 40 MG  | DAILY |    | 640  | 16 0.56168731 | Low           |
| NA | NA     | NA    | NA | NA   | NA            | NA            |
| Y  | 40 MG  | DAILY |    | 80   | 2 0.52805281  | Low           |
| NA | NA     | NA    | NA | NA   | NA            | NA            |
| NA | NA     | NA    | NA | NA   | NA            | NA            |
| Y  | 100 MG | Q24H  |    | 100  | 1 0.97780385  | Low           |
| NA | NA     | NA    | NA | NA   | NA            | NA            |
| NA | NA     | NA    | NA | NA   | NA            | NA            |
| NA | NA     | NA    | NA | NA   | NA            | NA            |
| NA | NA     | NA    | NA | NA   | NA            | NA            |

|    |       |        |    |      |    |                         |
|----|-------|--------|----|------|----|-------------------------|
| NA | NA    | NA     | NA | NA   | NA | NA                      |
| NA | NA    | NA     | NA | NA   | NA | NA                      |
| Y  | 40 MG | DAILY  |    | 40   | 1  | 0.4631774 Low           |
| Y  | 40 MG | DAILY  |    | 200  | 5  | 0.46412866 Low          |
| Y  | 30 MG | STAT   |    | 30   | 1  | 0.41248453 Low          |
| NA | NA    | NA     | NA | NA   | NA | NA                      |
| NA | NA    | NA     | NA | NA   | NA | NA                      |
| Y  | 40 MG | DAILY  |    | 200  | 5  | 0.54127199 Low          |
| NA | NA    | NA     | NA | NA   | NA | NA                      |
| NA | NA    | NA     | NA | NA   | NA | NA                      |
| Y  | 80 MG | Q12H   |    | 1280 | 16 | 1.96078431 Therapeutic  |
| NA | NA    | NA     | NA | NA   | NA | NA                      |
| NA | NA    | NA     | NA | NA   | NA | NA                      |
| NA | NA    | NA     | NA | NA   | NA | NA                      |
| NA | NA    | NA     | NA | NA   | NA | NA                      |
| Y  | 40 MG | DAILY  |    | 160  | 4  | 0.53333333 Low          |
| NA | NA    | NA     | NA | NA   | NA | NA                      |
| Y  | 40 MG | Q12H   |    | 1040 | 26 | 1.10230796 Intermediate |
| Y  | 30 MG | DAILY  |    | 120  | 4  | 0.54995417 Low          |
| NA | NA    | NA     | NA | NA   | NA | NA                      |
| Y  | 40 MG | DAILY  |    | 80   | 2  | 0.66666667 Low          |
| NA | NA    | NA     | NA | NA   | NA | NA                      |
| Y  | 40 MG | DAILY  |    | 160  | 4  | 0.47568082 Low          |
| Y  | 40 MG | Q12H 6 |    | 1000 | 25 | 0.50286002 Low          |
| Y  | 40 MG | DAILY  |    | 160  | 4  | 0.46412866 Low          |
| NA | NA    | NA     | NA | NA   | NA | NA                      |
| NA | NA    | NA     | NA | NA   | NA | NA                      |
| Y  | 30 MG | DAILY  |    | 60   | 2  | 0.73331704 Low          |
| NA | NA    | NA     | NA | NA   | NA | NA                      |
| NA | NA    | NA     | NA | NA   | NA | NA                      |
| NA | NA    | NA     | NA | NA   | NA | NA                      |
| NA | NA    | NA     | NA | NA   | NA | NA                      |
| Y  | 40 MG | DAILY  |    | 240  | 6  | 0.45454545 Low          |
| Y  | 40 MG | DAILY  |    | 200  | 5  | 0.53333333 Low          |
| Y  | 90 MG | Q12H 6 |    | 630  | 7  | 1.98417073 Therapeutic  |
| Y  | 40 MG | DAILY  |    | 360  | 9  | 0.50282841 Low          |
| NA | NA    | NA     | NA | NA   | NA | NA                      |
| NA | NA    | NA     | NA | NA   | NA | NA                      |
| NA | NA    | NA     | NA | NA   | NA | NA                      |
| NA | NA    | NA     | NA | NA   | NA | NA                      |
| NA | NA    | NA     | NA | NA   | NA | NA                      |
| Y  | 40 MG | DAILY  |    | 120  | 3  | 0.48887802 Low          |
| Y  | 40 MG | DAILY  |    | 440  | 11 | 0.4631774 Low           |

|    |       |       |    |     |              |              |
|----|-------|-------|----|-----|--------------|--------------|
| NA | NA    | NA    | NA | NA  | NA           | NA           |
| Y  | 40 MG | DAILY |    | 120 | 3 0.41237113 | Low          |
| Y  | 40 MG | DAILY |    | 200 | 5 0.51766533 | Low          |
| NA | NA    | NA    | NA | NA  | NA           | NA           |
| NA | NA    | NA    | NA | NA  | NA           | NA           |
| NA | NA    | NA    | NA | NA  | NA           | NA           |
| NA | NA    | NA    | NA | NA  | NA           | NA           |
| NA | NA    | NA    | NA | NA  | NA           | NA           |
| Y  | 40 MG | QHS   |    | 40  | 1 0.50282841 | Low          |
| NA | NA    | NA    | NA | NA  | NA           | NA           |
| NA | NA    | NA    | NA | NA  | NA           | NA           |
| NA | NA    | NA    | NA | NA  | NA           | NA           |
| NA | NA    | NA    | NA | NA  | NA           | NA           |
| NA | NA    | NA    | NA | NA  | NA           | NA           |
| Y  | 60 MG | BID   |    | 60  | 1 1.79104478 | Therapeutic  |
| Y  | 60 MG | QHS   |    | 240 | 4 1.01351351 | Intermediate |
| NA | NA    | NA    | NA | NA  | NA           | NA           |
| NA | NA    | NA    | NA | NA  | NA           | NA           |
| NA | NA    | NA    | NA | NA  | NA           | NA           |
| NA | NA    | NA    | NA | NA  | NA           | NA           |
| Y  | 80 MG | STAT  |    | 80  | 1 0.98765432 | Low          |
| NA | NA    | NA    | NA | NA  | NA           | NA           |
| NA | NA    | NA    | NA | NA  | NA           | NA           |
| NA | NA    | NA    | NA | NA  | NA           | NA           |
| NA | NA    | NA    | NA | NA  | NA           | NA           |
| NA | NA    | NA    | NA | NA  | NA           | NA           |
| NA | NA    | NA    | NA | NA  | NA           | NA           |
| Y  | 40 MG | DAILY |    | 160 | 4 0.36666972 | Low          |
| Y  | 40 MG | Q24H  |    | 240 | 6 0.51873274 | Low          |
| Y  | 40 MG | DAILY |    | 120 | 3 0.36743767 | Low          |
| NA | NA    | NA    | NA | NA  | NA           | NA           |
| NA | NA    | NA    | NA | NA  | NA           | NA           |
| Y  | 40 MG | DAILY |    | 240 | 6 0.42105263 | Low          |
| NA | NA    | NA    | NA | NA  | NA           | NA           |
| NA | NA    | NA    | NA | NA  | NA           | NA           |
| Y  | 40 MG | Q12H  |    | 320 | 8 0.58694057 | Low          |
| NA | NA    | NA    | NA | NA  | NA           | NA           |
| NA | NA    | NA    | NA | NA  | NA           | NA           |
| NA | NA    | NA    | NA | NA  | NA           | NA           |
| Y  | 40 MG | DAILY |    | 120 | 3 0.50377834 | Low          |

|    |        |       |    |     |    |                         |
|----|--------|-------|----|-----|----|-------------------------|
| NA | NA     | NA    | NA | NA  | NA | NA                      |
| Y  | 80 MG  | STAT  |    | 80  | 1  | 1.03533066 Intermediate |
| NA | NA     | NA    | NA | NA  | NA | NA                      |
| Y  | 40 MG  | Q12H  |    | 320 | 8  | 0.58694057 Low          |
| Y  | 60 MG  | STAT  |    | 60  | 1  | 0.91463415 Low          |
| NA | NA     | NA    | NA | NA  | NA | NA                      |
| NA | NA     | NA    | NA | NA  | NA | NA                      |
| Y  | 40 MG  | DAILY |    | 160 | 4  | 0.36666972 Low          |
| NA | NA     | NA    | NA | NA  | NA | NA                      |
| NA | NA     | NA    | NA | NA  | NA | NA                      |
| NA | NA     | NA    | NA | NA  | NA | NA                      |
| NA | NA     | NA    | NA | NA  | NA | NA                      |
| NA | NA     | NA    | NA | NA  | NA | NA                      |
| NA | NA     | NA    | NA | NA  | NA | NA                      |
| NA | NA     | NA    | NA | NA  | NA | NA                      |
| Y  | 120 MG | Q12H  |    | 120 | 1  | 1.875 Therapeutic       |
| Y  | 30 MG  | Q24H  |    | 300 | 10 | 0.6 Low                 |
| Y  | 40 MG  | Q24H  |    | 160 | 4  | 0.44763759 Low          |
| Y  | 40 MG  | Q24H  |    | 40  | 1  | 0.62853551 Low          |
| NA | NA     | NA    | NA | NA  | NA | NA                      |
| NA | NA     | NA    | NA | NA  | NA | NA                      |
| NA | NA     | NA    | NA | NA  | NA | NA                      |
| NA | NA     | NA    | NA | NA  | NA | NA                      |
| NA | NA     | NA    | NA | NA  | NA | NA                      |
| NA | NA     | NA    | NA | NA  | NA | NA                      |
| Y  | 40 MG  | DAILY |    | 80  | 2  | 0.54794521 Low          |
| NA | NA     | NA    | NA | NA  | NA | NA                      |
| NA | NA     | NA    | NA | NA  | NA | NA                      |
| NA | NA     | NA    | NA | NA  | NA | NA                      |
| NA | NA     | NA    | NA | NA  | NA | NA                      |
| NA | NA     | NA    | NA | NA  | NA | NA                      |
| Y  | 40 MG  | DAILY |    | 160 | 4  | 0.49200492 Low          |
| NA | NA     | NA    | NA | NA  | NA | NA                      |
| NA | NA     | NA    | NA | NA  | NA | NA                      |
| NA | NA     | NA    | NA | NA  | NA | NA                      |
| NA | NA     | NA    | NA | NA  | NA | NA                      |
| Y  | 100 MG | Q24H  |    | 100 | 1  | 0.93813911 Low          |
| NA | NA     | NA    | NA | NA  | NA | NA                      |
| NA | NA     | NA    | NA | NA  | NA | NA                      |
| NA | NA     | NA    | NA | NA  | NA | NA                      |
| Y  | 100 MG | Q12H  |    | 100 | 1  | 2.06185567 Therapeutic  |







|    |       |       |    |     |    |                        |
|----|-------|-------|----|-----|----|------------------------|
| NA | NA    | NA    | NA | NA  | NA | NA                     |
| NA | NA    | NA    | NA | NA  | NA | NA                     |
| Y  | 50 MG | Q12H  |    | 50  | 1  | 1.83318057 Therapeutic |
| NA | NA    | NA    | NA | NA  | NA | NA                     |
| NA | NA    | NA    | NA | NA  | NA | NA                     |
| NA | NA    | NA    | NA | NA  | NA | NA                     |
| NA | NA    | NA    | NA | NA  | NA | NA                     |
| NA | NA    | NA    | NA | NA  | NA | NA                     |
| Y  | 40 MG | Q24H  |    | 320 | 8  | 0.4399956 Low          |
| NA | NA    | NA    | NA | NA  | NA | NA                     |
| NA | NA    | NA    | NA | NA  | NA | NA                     |
| Y  | 40 MG | Q24H  |    | 40  | 1  | 0.41753653 Low         |
| NA | NA    | NA    | NA | NA  | NA | NA                     |
| NA | NA    | NA    | NA | NA  | NA | NA                     |
| NA | NA    | NA    | NA | NA  | NA | NA                     |
| NA | NA    | NA    | NA | NA  | NA | NA                     |
| NA | NA    | NA    | NA | NA  | NA | NA                     |
| NA | NA    | NA    | NA | NA  | NA | NA                     |
| NA | NA    | NA    | NA | NA  | NA | NA                     |
| NA | NA    | NA    | NA | NA  | NA | NA                     |
| NA | NA    | NA    | NA | NA  | NA | NA                     |
| NA | NA    | NA    | NA | NA  | NA | NA                     |
| NA | NA    | NA    | NA | NA  | NA | NA                     |
| NA | NA    | NA    | NA | NA  | NA | NA                     |
| NA | NA    | NA    | NA | NA  | NA | NA                     |
| NA | NA    | NA    | NA | NA  | NA | NA                     |
| NA | NA    | NA    | NA | NA  | NA | NA                     |
| NA | NA    | NA    | NA | NA  | NA | NA                     |
| NA | NA    | NA    | NA | NA  | NA | NA                     |
| NA | NA    | NA    | NA | NA  | NA | NA                     |
| NA | NA    | NA    | NA | NA  | NA | NA                     |
| NA | NA    | NA    | NA | NA  | NA | NA                     |
| NA | NA    | NA    | NA | NA  | NA | NA                     |
| NA | NA    | NA    | NA | NA  | NA | NA                     |
| Y  | 40 MG | DAILY |    | 360 | 9  | 0.73487535 Low         |
| Y  | 40 MG | DAILY |    | 240 | 6  | 0.54997938 Low         |
| NA | NA    | NA    | NA | NA  | NA | NA                     |
| Y  | 40 MG | DAILY |    | 40  | 1  | 0.58823529 Low         |
| NA | NA    | NA    | NA | NA  | NA | NA                     |
| NA | NA    | NA    | NA | NA  | NA | NA                     |
| Y  | 30 MG | STAT  |    | 30  | 1  | 0.42857143 Low         |
| NA | NA    | NA    | NA | NA  | NA | NA                     |
| NA | NA    | NA    | NA | NA  | NA | NA                     |
| NA | NA    | NA    | NA | NA  | NA | NA                     |
| Y  | 40 MG | Q24H  |    | 120 | 3  | 0.56053812 Low         |
| NA | NA    | NA    | NA | NA  | NA | NA                     |

|    |       |       |    |     |               |     |
|----|-------|-------|----|-----|---------------|-----|
| NA | NA    | NA    | NA | NA  | NA            | NA  |
| NA | NA    | NA    | NA | NA  | NA            | NA  |
| NA | NA    | NA    | NA | NA  | NA            | NA  |
| NA | NA    | NA    | NA | NA  | NA            | NA  |
| Y  | 40 MG | DAILY |    | 400 | 10 0.53123672 | Low |
| NA | NA    | NA    | NA | NA  | NA            | NA  |
| NA | NA    | NA    | NA | NA  | NA            | NA  |

|    |    |    |    |       |            |    |
|----|----|----|----|-------|------------|----|
| NA | NA | NA | NA | NA    | NA         | NA |
| NA | NA | NA | NA | NA    | NA         | NA |
| NA | NA | NA | NA | NA    | NA         | NA |
| NA | NA | NA | NA | NA    | NA         | NA |
| NA | NA | NA | NA | NA    | NA         | NA |
| NA | NA | NA | NA | NA    | NA         | NA |
| NA | NA | NA | NA | NA    | NA         | NA |
| NA | NA | NA | NA | NA    | NA         | NA |
| NA | NA | NA | NA | NA    | NA         | NA |
| NA | NA | NA | NA | NA    | NA         | NA |
| NA | NA | NA | NA | NA    | NA         | NA |
| NA | NA | NA | NA | NA    | NA         | NA |
| NA | NA | NA | NA | NA    | NA         | NA |
| NA | NA | NA | NA | NA    | NA         | NA |
| NA | NA | NA | NA | NA    | NA         | NA |
| NA | NA | NA | NA | NA    | NA         | NA |
| NA | NA | NA | NA | NA    | NA         | NA |
| NA | NA | NA | NA | NA    | NA         | NA |
| NA | NA | NA | NA | NA    | NA         | NA |
| NA | NA | NA | NA | NA    | NA         | NA |
| Y  | NA | NA | NA | NA    | NA         | NA |
| NA | NA | NA | NA | NA    | NA         | NA |
| NA | NA | NA | NA | NA    | NA         | NA |
| NA | NA | NA | NA | NA    | NA         | NA |
| NA | NA | NA | NA | NA    | NA         | NA |
| Y  | NA | Y  |    | 4000  | 40.0801603 | NA |
| NA | NA | NA | NA |       | NA         | NA |
| NA | NA | NA | NA |       | NA         | NA |
| NA | NA | Y  |    | 5000  | 64.841592  | NA |
| NA | NA | NA | NA |       | NA         | NA |
| NA | NA | NA | NA |       | NA         | NA |
| NA | NA | Y  |    | 15000 | 235.700817 | NA |
| NA | NA | NA | NA |       | NA         | NA |
| NA | NA | NA | NA |       | NA         | NA |
| NA | NA | NA | NA |       | NA         | NA |
| NA | NA | NA | NA |       | NA         | NA |
| NA | NA | NA | NA |       | NA         | NA |
| NA | NA | NA | NA |       | NA         | NA |
| NA | NA | NA | NA |       | NA         | NA |
| NA | NA | NA | NA |       | NA         | NA |
| NA | NA | NA | NA |       | NA         | NA |
| NA | NA | NA | NA |       | NA         | NA |
| NA | NA | NA | NA |       | NA         | NA |
| NA | NA | NA | NA |       | NA         | NA |
| NA | NA | NA | NA |       | NA         | NA |
| NA | NA | Y  |    | 15000 | 290.135397 | NA |
| NA | NA | NA | NA |       | NA         | NA |

|    |    |    |    |       |            |    |
|----|----|----|----|-------|------------|----|
| NA | NA | NA | NA | NA    | NA         | NA |
| NA | NA | NA | NA | NA    | NA         | NA |
| NA | NA | NA | NA | NA    | NA         | NA |
| NA | NA | Y  |    | 15000 | 227.583068 | NA |
| NA | NA | NA | NA | NA    | NA         | NA |
| NA | NA | NA | NA | NA    | NA         | NA |
| NA | NA | NA | NA | NA    | NA         | NA |
| Y  | NA | Y  |    | 7000  | 79.4551646 | NA |
| NA | NA | NA | NA | NA    | NA         | NA |
| NA | NA | NA | NA | NA    | NA         | NA |
| NA | NA | NA | NA | NA    | NA         | NA |
| NA | NA | NA | NA | NA    | NA         | NA |
| NA | NA | NA | NA | NA    | NA         | NA |
| NA | NA | NA | NA | NA    | NA         | NA |
| NA | NA | NA | NA | NA    | NA         | NA |
| NA | NA | NA | NA | NA    | NA         | NA |
| Y  | NA | Y  |    | 4000  | 59.1812277 | NA |
| NA | NA | NA | NA | NA    | NA         | NA |
| NA | NA | Y  |    | 15000 | 165.347561 | NA |
| NA | NA | NA | NA | NA    | NA         | NA |
| NA | NA | NA | NA | NA    | NA         | NA |
| NA | NA | NA | NA | NA    | NA         | NA |
| NA | NA | NA | NA | NA    | NA         | NA |
| NA | NA | NA | NA | NA    | NA         | NA |
| NA | NA | NA | NA | NA    | NA         | NA |
| NA | NA | NA | NA | NA    | NA         | NA |
| NA | NA | Y  |    | 15000 | 137.501146 | NA |
| NA | NA | NA | NA | NA    | NA         | NA |
| Y  | NA | Y  |    | 4000  | 64.3086817 | NA |
| NA | NA | NA | NA | NA    | NA         | NA |
| NA | NA | NA | NA | NA    | NA         | NA |
| NA | NA | NA | NA | NA    | NA         | NA |
| NA | NA | NA | NA | NA    | NA         | NA |
| NA | NA | NA | NA | NA    | NA         | NA |
| NA | NA | NA | NA | NA    | NA         | NA |
| NA | NA | Y  |    | 15000 | 194.124499 | NA |
| NA | NA | NA | NA | NA    | NA         | NA |
| NA | NA | NA | NA | NA    | NA         | NA |
| NA | NA | NA | NA | NA    | NA         | NA |
| NA | NA | NA | NA | NA    | NA         | NA |
| NA | NA | Y  |    | 15000 | 162.86645  | NA |
| NA | NA | NA | NA | NA    | NA         | NA |
| NA | NA | NA | NA | NA    | NA         | NA |



|    |    |    |    |       |            |    |
|----|----|----|----|-------|------------|----|
| NA | NA | NA | NA | NA    | NA         | NA |
| NA | NA | NA | NA | NA    | NA         | NA |
| NA | NA | NA | NA | NA    | NA         | NA |
| NA | NA | NA | NA | NA    | NA         | NA |
| NA | NA | NA | NA | NA    | NA         | NA |
| NA | NA | NA | NA | NA    | NA         | NA |
| NA | NA | NA | NA | NA    | NA         | NA |
| NA | NA | Y  |    | 15000 | 206.242266 | NA |
| NA | NA | NA | NA | NA    | NA         | NA |
| NA | NA | NA | NA | NA    | NA         | NA |
| NA | NA | NA | NA | NA    | NA         | NA |
| NA | NA | NA | NA | NA    | NA         | NA |
| NA | NA | NA | NA | NA    | NA         | NA |
| Y  | NA | Y  |    | 3600  | 39.599604  | NA |
| NA | NA | NA | NA | NA    | NA         | NA |
| Y  | NA | Y  |    | 7500  | 79.6178344 | NA |
| NA | NA | NA | NA | NA    | NA         | NA |
| NA | NA | NA | NA | NA    | NA         | NA |
| NA | NA | NA | NA | NA    | NA         | NA |
| NA | NA | Y  |    | 15000 | 164.99835  | NA |
| NA | NA | NA | NA | NA    | NA         | NA |
| NA | NA | Y  |    | 15000 | 197.602424 | NA |
| NA | NA | Y  |    | 5000  | 51.1613629 | NA |
| NA | NA | NA | NA | NA    | NA         | NA |
| NA | NA | NA | NA | NA    | NA         | NA |
| NA | NA | NA | NA | NA    | NA         | NA |
| NA | NA | Y  |    | 15000 | 206.242266 | NA |
| NA | NA | NA | NA | NA    | NA         | NA |
| NA | NA | Y  |    | 15000 | 274.977085 | NA |
| NA | NA | NA | NA | NA    | NA         | NA |
| NA | NA | NA | NA | NA    | NA         | NA |
| NA | NA | NA | NA | NA    | NA         | NA |
| NA | NA | NA | NA | NA    | NA         | NA |
| NA | NA | Y  |    | 15000 | 183.329259 | NA |
| NA | NA | NA | NA | NA    | NA         | NA |
| NA | NA | NA | NA | NA    | NA         | NA |
| NA | NA | NA | NA | NA    | NA         | NA |
| NA | NA | NA | NA | NA    | NA         | NA |
| NA | NA | NA | NA | NA    | NA         | NA |
| NA | NA | Y  |    | 15000 | 194.124499 | NA |
| NA | NA | NA | NA | NA    | NA         | NA |
| NA | NA | NA | NA | NA    | NA         | NA |
| NA | NA | Y  |    | 5000  | 64.7081662 | NA |
| NA | NA | NA | NA | NA    | NA         | NA |







|    |    |    |    |       |            |    |
|----|----|----|----|-------|------------|----|
| NA | NA | NA | NA | NA    | NA         | NA |
| NA | NA | NA | NA | NA    | NA         | NA |
| Y  | NA | Y  |    | 6000  | 61.5245791 | NA |
| NA | NA | NA | NA | NA    | NA         | NA |
| NA | NA | NA | NA | NA    | NA         | NA |
| NA | NA | NA | NA | NA    | NA         | NA |
| NA | NA | NA | NA | NA    | NA         | NA |
| NA | NA | NA | NA | NA    | NA         | NA |
| NA | NA | NA | NA | NA    | NA         | NA |
| NA | NA | NA | NA | NA    | NA         | NA |
| NA | NA | NA | NA | NA    | NA         | NA |
| NA | NA | Y  |    | 15000 | 255.972696 | NA |
| Y  | NA | Y  |    | 15000 | 196.592398 | NA |
| NA | NA | NA | NA | NA    | NA         | NA |
| NA | NA | NA | NA | NA    | NA         | NA |
| NA | NA | Y  |    | 15000 | 214.285714 | NA |
| NA | NA | NA | NA | NA    | NA         | NA |
| NA | NA | NA | NA | NA    | NA         | NA |
| NA | NA | NA | NA | NA    | NA         | NA |
| NA | NA | NA | NA | NA    | NA         | NA |
| NA | NA | NA | NA | NA    | NA         | NA |
| NA | NA | NA | NA | NA    | NA         | NA |
| NA | NA | NA | NA | NA    | NA         | NA |
| NA | NA | NA | NA | NA    | NA         | NA |
| NA | NA | NA | NA | NA    | NA         | NA |
| NA | NA | NA | NA | NA    | NA         | NA |
| NA | NA | NA | NA | NA    | NA         | NA |
| NA | NA | NA | NA | NA    | NA         | NA |
| NA | NA | NA | NA | NA    | NA         | NA |
| NA | NA | NA | NA | NA    | NA         | NA |
| NA | NA | NA | NA | NA    | NA         | NA |
| NA | NA | NA | NA | NA    | NA         | NA |
| Y  | NA | Y  |    | 15000 | 189.633375 | NA |
| NA | NA | Y  |    | 15000 | 241.935484 | NA |
| NA | NA | NA | NA | NA    | NA         | Y  |
| NA | NA | NA | NA | NA    | NA         | NA |
| NA | NA | NA | NA | NA    | NA         | NA |
| NA | NA | NA | NA | NA    | NA         | NA |
| NA | NA | NA | NA | NA    | NA         | NA |
| NA | NA | NA | NA | NA    | NA         | NA |
| NA | NA | NA | NA | NA    | NA         | NA |
| NA | NA | NA | NA | NA    | NA         | NA |
| NA | NA | NA | NA | NA    | NA         | NA |
| NA | NA | NA | NA | NA    | NA         | NA |
| NA | NA | NA | NA | NA    | NA         | NA |
| NA | NA | NA | NA | NA    | NA         | NA |
| NA | NA | Y  |    | 15000 | 166.666667 | NA |

|    |    |    |    |       |            |    |
|----|----|----|----|-------|------------|----|
| NA | NA | NA | NA | NA    | NA         | NA |
| NA | NA | NA | NA | NA    | NA         | NA |
| NA | NA | NA | NA | NA    | NA         | NA |
| NA | NA | NA | NA | NA    | NA         | NA |
| NA | NA | NA | NA | NA    | NA         | NA |
| NA | NA | NA | NA | NA    | NA         | NA |
| NA | NA | NA | NA | NA    | NA         | NA |
| NA | NA | NA | NA | NA    | NA         | NA |
| NA | NA | NA | NA | NA    | NA         | NA |
| NA | NA | NA | NA | NA    | NA         | NA |
| NA | NA | NA | NA | NA    | NA         | NA |
| NA | NA | Y  |    | 10000 | 121.550991 | NA |
| NA | NA | Y  |    | 15000 | 178.571429 | NA |
| NA | NA | NA | NA | NA    | NA         | NA |
| NA | NA | NA | NA | NA    | NA         | NA |
| NA | NA | Y  |    | 15000 | 294.117647 | NA |
| NA | NA | NA | NA | NA    | NA         | NA |
| NA | NA | NA | NA | NA    | NA         | NA |
| NA | NA | NA | NA | NA    | NA         | NA |
| NA | NA | NA | NA | NA    | NA         | NA |
| NA | NA | Y  |    | 15000 | 263.157895 | NA |
| NA | NA | NA | NA | NA    | NA         | NA |
| NA | NA | NA | NA | NA    | NA         | NA |
| NA | NA | NA | NA | NA    | NA         | NA |
| NA | NA | NA | NA | NA    | NA         | NA |
| NA | NA | NA | NA | NA    | NA         | NA |
| NA | NA | NA | NA | NA    | NA         | NA |
| NA | NA | NA | NA | NA    | NA         | NA |
| NA | NA | NA | NA | NA    | NA         | NA |
| NA | NA | NA | NA | NA    | NA         | NA |
| NA | NA | NA | NA | NA    | NA         | NA |
| NA | NA | NA | NA | NA    | NA         | NA |
| NA | NA | NA | NA | NA    | NA         | NA |
| NA | NA | Y  |    | 10000 | 133.333333 | NA |
| NA | NA | NA | NA | NA    | NA         | NA |
| NA | NA | NA | NA | NA    | NA         | NA |
| NA | NA | NA | NA | NA    | NA         | NA |
| NA | NA | Y  |    | 15000 | 128.175549 | NA |
| NA | NA | NA | NA | NA    | NA         | NA |
| NA | NA | NA | NA | NA    | NA         | NA |
| NA | NA | NA | NA | NA    | NA         | NA |



|    |    |    |    |       |            |    |
|----|----|----|----|-------|------------|----|
| NA | NA | NA | NA | NA    | NA         | NA |
| NA | NA | NA | NA | NA    | NA         | NA |
| NA | NA | NA | NA | NA    | NA         | NA |
| NA | NA | NA | NA | NA    | NA         | NA |
| NA | NA | NA | NA | NA    | NA         | NA |
| NA | NA | NA | NA | NA    | NA         | NA |
| NA | NA | NA | NA | NA    | NA         | NA |
| NA | NA | NA | NA | NA    | NA         | NA |
| NA | NA | NA | NA | NA    | NA         | NA |
| Y  | NA | Y  |    | 5880  | 81.0196349 | NA |
| NA | NA | Y  |    | 15000 | 185.185185 | NA |
| NA | NA | NA | NA | NA    | NA         | NA |
| NA | NA | NA | NA | NA    | NA         | NA |
| NA | NA | NA | NA | NA    | NA         | NA |
| NA | NA | NA | NA | NA    | NA         | NA |
| NA | NA | Y  |    | 10000 | 125.707102 | NA |
| Y  | NA | Y  |    | 5000  | 57.8703704 | NA |
| NA | NA | NA | NA | NA    | NA         | NA |
| NA | NA | NA | NA | NA    | NA         | NA |
| NA | NA | NA | NA | NA    | NA         | NA |
| NA | NA | NA | NA | NA    | NA         | NA |
| NA | NA | NA | NA | NA    | NA         | NA |
| NA | NA | NA | NA | NA    | NA         | NA |
| NA | NA | Y  |    | 15000 | 188.560654 | NA |
| NA | NA | NA | NA | NA    | NA         | NA |
| NA | NA | Y  |    | 15000 | 137.789128 | NA |
| NA | NA | NA | NA | NA    | NA         | NA |
| NA | NA | NA | NA | NA    | NA         | NA |
| NA | NA | NA | NA | NA    | NA         | NA |
| NA | NA | Y  |    | 15000 | 147.63053  | NA |
| NA | NA | NA | NA | NA    | NA         | NA |
| NA | NA | NA | NA | NA    | NA         | NA |
| NA | NA | NA | NA | NA    | NA         | NA |
| NA | NA | NA | NA | NA    | NA         | NA |
| NA | NA | NA | NA | NA    | NA         | NA |
| NA | NA | NA | NA | NA    | NA         | NA |
| NA | NA | NA | NA | NA    | NA         | NA |
| NA | NA | Y  |    | 15000 | 220.005867 | NA |
| NA | NA | NA | NA | NA    | NA         | NA |
| NA | NA | NA | NA | NA    | NA         | NA |
| NA | NA | NA | NA | NA    | NA         | NA |

|    |    |    |    |       |            |    |
|----|----|----|----|-------|------------|----|
| NA | NA | NA | NA | NA    | NA         | NA |
| NA | NA | NA | NA | NA    | NA         | NA |
| NA | NA | NA | NA | NA    | NA         | NA |
| NA | NA | NA | NA | NA    | NA         | NA |
| NA | NA | NA | NA | NA    | NA         | NA |
| NA | NA | NA | NA | NA    | NA         | NA |
| NA | NA | NA | NA | NA    | NA         | NA |
| Y  | NA | Y  |    | 2500  | 40         | NA |
| NA | NA | NA | NA | NA    | NA         | NA |
| NA | NA | NA | NA | NA    | NA         | NA |
| NA | NA | NA | NA | NA    | NA         | NA |
| NA | NA | NA | NA | NA    | NA         | NA |
| NA | NA | Y  |    | 5000  | 47.6190476 | NA |
| NA | NA | NA | NA | NA    | NA         | NA |
| NA | NA | NA | NA | NA    | NA         | NA |
| NA | NA | Y  |    | 15000 | 150        | NA |
| NA | NA | Y  |    | 15000 | 236.209313 | NA |
| NA | NA | NA | NA | NA    | NA         | NA |
| NA | NA | NA | NA | NA    | NA         | NA |
| NA | NA | NA | NA | NA    | NA         | NA |
| NA | NA | NA | NA | NA    | NA         | NA |
| NA | NA | NA | NA | NA    | NA         | NA |
| NA | NA | NA | NA | NA    | NA         | NA |
| NA | NA | Y  |    | 15000 | 253.850059 | NA |
| NA | NA | NA | NA | NA    | NA         | NA |
| NA | NA | NA | NA | NA    | NA         | NA |
| NA | NA | NA | NA | NA    | NA         | NA |
| NA | NA | Y  |    | 15000 | 178.380307 | NA |
| NA | NA | Y  |    | 15000 | 183.329259 | NA |
| NA | NA | Y  |    | 22500 | 137.505347 | NA |
| NA | NA | NA | NA | NA    | NA         | NA |
| NA | NA | NA | NA | NA    | NA         | NA |
| NA | NA | Y  |    | 10000 | 169.233373 | NA |
| NA | NA | NA | NA | NA    | NA         | NA |
| NA | NA | NA | NA | NA    | NA         | NA |
| NA | NA | NA | NA | NA    | NA         | NA |
| NA | NA | Y  |    | 10000 | 120.221207 | NA |
| NA | NA | Y  |    | 15000 | 183.329259 | NA |
| NA | NA | NA | NA | NA    | NA         | NA |
| NA | NA | NA | NA | NA    | NA         | NA |
| NA | NA | NA | NA | NA    | NA         | NA |





|    |    |    |    |       |            |    |
|----|----|----|----|-------|------------|----|
| NA | NA | NA | NA | NA    | NA         | NA |
| NA | NA | NA | NA | NA    | NA         | NA |
| NA | NA | NA | NA | NA    | NA         | NA |
| NA | NA | NA | NA | NA    | NA         | NA |
| NA | NA | NA | NA | NA    | NA         | NA |
| NA | NA | NA | NA | NA    | NA         | NA |
| NA | NA | NA | NA | NA    | NA         | NA |
| NA | NA | NA | NA | NA    | NA         | NA |
| NA | NA | NA | NA | NA    | NA         | NA |
| NA | NA | NA | NA | NA    | NA         | NA |
| NA | NA | NA | NA | NA    | NA         | NA |
| NA | NA | NA | NA | NA    | NA         | NA |
| NA | NA | NA | NA | NA    | NA         | NA |
| NA | NA | NA | NA | NA    | NA         | NA |
| NA | NA | NA | NA | NA    | NA         | NA |
| NA | NA | NA | NA | NA    | NA         | NA |
| NA | NA | NA | NA | NA    | NA         | NA |
| NA | NA | NA | NA | NA    | NA         | NA |
| NA | NA | Y  |    | 15000 | 166.666667 | NA |
| NA | NA | NA | NA | NA    | NA         | NA |
| NA | NA | NA | NA | NA    | NA         | NA |
| NA | NA | NA | NA | NA    | NA         | NA |
| NA | NA | NA | NA | NA    | NA         | NA |
| NA | NA | Y  |    | 15000 | 200        | NA |
| NA | NA | NA | NA | NA    | NA         | NA |
| Y  | NA | NA | NA | NA    | NA         | NA |
| NA | NA | Y  |    | 15000 | 153.811448 | NA |
| NA | NA | NA | NA | NA    | NA         | NA |
| NA | NA | Y  |    | 15000 | 240        | NA |
| NA | NA | NA | NA | NA    | NA         | NA |
| NA | NA | NA | NA | NA    | NA         | NA |
| NA | NA | NA | NA | NA    | NA         | NA |
| NA | NA | NA | NA | NA    | NA         | NA |
| NA | NA | NA | NA | NA    | NA         | NA |
| NA | NA | NA | NA | NA    | NA         | NA |
| NA | NA | NA | NA | NA    | NA         | NA |
| NA | NA | NA | NA | NA    | NA         | NA |
| NA | NA | NA | NA | NA    | NA         | NA |
| NA | NA | Y  |    | 15000 | 167.597765 | NA |
| NA | NA | NA | NA | NA    | NA         | NA |
| NA | NA | NA | NA | NA    | NA         | NA |



|    |    |    |    |       |            |    |
|----|----|----|----|-------|------------|----|
| NA | NA | NA | NA | NA    | NA         | NA |
| NA | NA | NA | NA | NA    | NA         | NA |
| NA | NA | NA | NA | NA    | NA         | NA |
| NA | NA | NA | NA | NA    | NA         | NA |
| NA | NA | NA | NA | NA    | NA         | NA |
| NA | NA | Y  |    | 15000 | 173.691524 | NA |
| NA | NA | Y  |    | 15000 | 165.347561 | NA |
| NA | NA | NA | NA | NA    | NA         | NA |
| NA | NA | NA | NA | NA    | NA         | NA |
| NA | NA | NA | NA | NA    | NA         | NA |
| NA | NA | NA | NA | NA    | NA         | NA |
| NA | NA | NA | NA | NA    | NA         | NA |
| NA | NA | NA | NA | NA    | NA         | NA |
| NA | NA | NA | NA | NA    | NA         | NA |
| NA | NA | Y  |    | 15000 | 200        | NA |
| NA | NA | NA | NA | NA    | NA         | NA |
| NA | NA | NA | NA | NA    | NA         | NA |
| NA | NA | NA | NA | NA    | NA         | NA |
| NA | NA | NA | NA | NA    | NA         | NA |
| NA | NA | NA | NA | NA    | NA         | NA |
| NA | NA | NA | NA | NA    | NA         | NA |
| NA | NA | NA | NA | NA    | NA         | NA |
| NA | NA | NA | NA | NA    | NA         | NA |
| NA | NA | NA | NA | NA    | NA         | NA |
| Y  | NA | Y  |    | 9000  | 84.9858357 | NA |
| NA | NA | NA | NA | NA    | NA         | NA |
| NA | NA | NA | NA | NA    | NA         | NA |
| NA | NA | NA | NA | NA    | NA         | NA |
| NA | NA | NA | NA | NA    | NA         | NA |
| NA | NA | Y  |    | 15000 | 232.378002 | NA |
| NA | NA | NA | NA | NA    | NA         | NA |
| NA | NA | NA | NA | NA    | NA         | NA |
| NA | NA | NA | NA | NA    | NA         | NA |
| NA | NA | NA | NA | NA    | NA         | NA |
| NA | NA | Y  |    | 15000 | 224.961757 | NA |
| NA | NA | NA | NA | NA    | NA         | NA |
| NA | NA | NA | NA | NA    | NA         | NA |
| NA | NA | NA | NA | NA    | NA         | NA |
| NA | NA | NA | NA | NA    | NA         | NA |
| NA | NA | NA | NA | NA    | NA         | Y  |
| NA | NA | NA | NA | NA    | NA         | NA |
| NA | NA | NA | NA | NA    | NA         | NA |
| NA | NA | NA | NA | NA    | NA         | NA |
| NA | NA | Y  |    | 15000 | 254.237288 | NA |
| NA | NA | NA | NA | NA    | NA         | NA |

|    |    |    |    |       |             |    |
|----|----|----|----|-------|-------------|----|
| NA | NA | NA | NA | NA    | NA          | NA |
| NA | NA | NA | NA | NA    | NA          | NA |
| NA | NA | NA | NA | NA    | NA          | NA |
| Y  | NA | Y  |    | 4000  | 44.44444444 | NA |
| NA | NA | NA | NA | NA    | NA          | NA |
| NA | NA | NA | NA | NA    | NA          | NA |
| NA | NA | NA | NA | NA    | NA          | NA |
| NA | NA | NA | NA | NA    | NA          | NA |
| NA | NA | NA | NA | NA    | NA          | NA |
| NA | NA | NA | NA | NA    | NA          | NA |
| NA | NA | NA | NA | NA    | NA          | NA |
| NA | NA | NA | NA | NA    | NA          | NA |
| NA | NA | Y  |    | 15000 | 198.675497  | NA |
| NA | NA | NA | NA | NA    | NA          | NA |
| NA | NA | Y  |    | 15000 | 274.977085  | NA |
| NA | NA | NA | NA | NA    | NA          | NA |
| Y  | NA | Y  |    | 6600  | 80.1944107  | NA |
| NA | NA | NA | NA | NA    | NA          | NA |
| NA | NA | NA | NA | NA    | NA          | NA |
| NA | NA | NA | NA | NA    | NA          | NA |
| NA | NA | NA | NA | NA    | NA          | NA |
| NA | NA | NA | NA | NA    | NA          | NA |
| NA | NA | NA | NA | NA    | NA          | NA |
| NA | NA | NA | NA | NA    | NA          | NA |
| NA | NA | NA | NA | NA    | NA          | NA |
| NA | NA | NA | NA | NA    | NA          | NA |
| NA | NA | Y  |    | 15000 | 220.005867  | NA |
| NA | NA | NA | NA | NA    | NA          | NA |
| NA | NA | NA | NA | NA    | NA          | NA |
| NA | NA | NA | NA | NA    | NA          | NA |
| NA | NA | NA | NA | NA    | NA          | NA |
| NA | NA | NA | NA | NA    | NA          | NA |
| NA | NA | NA | NA | NA    | NA          | NA |
| Y  | NA | Y  |    | 15000 | 202.702703  | NA |
| NA | NA | NA | NA | NA    | NA          | NA |
| NA | NA | NA | NA | NA    | NA          | NA |
| NA | NA | NA | NA | NA    | NA          | NA |
| NA | NA | NA | NA | NA    | NA          | NA |
| NA | NA | Y  |    | 15000 | 217.391304  | NA |
| Y  | NA | Y  |    | 6000  | 72.9040097  | NA |
| NA | NA | NA | NA | NA    | NA          | NA |
| NA | NA | NA | NA | NA    | NA          | NA |
| NA | NA | NA | NA | NA    | NA          | NA |

|    |    |    |    |       |            |    |
|----|----|----|----|-------|------------|----|
| Y  | NA | NA | NA | NA    | NA         | NA |
| NA | NA | NA | NA | NA    | NA         | NA |
| NA | NA | NA | NA | NA    | NA         | NA |
| NA | NA | NA | NA | NA    | NA         | NA |
| NA | NA | NA | NA | NA    | NA         | NA |
| NA | NA | NA | NA | NA    | NA         | NA |
| NA | NA | NA | NA | NA    | NA         | NA |
| NA | NA | NA | NA | NA    | NA         | NA |
| NA | NA | NA | NA | NA    | NA         | NA |
| NA | NA | NA | NA | NA    | NA         | NA |
| NA | NA | NA | NA | NA    | NA         | NA |
| NA | NA | NA | NA | NA    | NA         | NA |
| NA | NA | NA | NA | NA    | NA         | NA |
| NA | NA | NA | NA | NA    | NA         | NA |
| NA | NA | NA | NA | NA    | NA         | NA |
| NA | NA | NA | NA | NA    | NA         | NA |
| NA | NA | NA | NA | NA    | NA         | NA |
| NA | NA | NA | NA | NA    | NA         | NA |
| NA | NA | NA | NA | NA    | NA         | NA |
| NA | NA | NA | NA | NA    | NA         | NA |
| NA | NA | Y  |    | 5000  | 62.2773584 | NA |
| NA | NA | NA | NA | NA    | NA         | NA |
| NA | NA | NA | NA | NA    | NA         | NA |
| NA | NA | NA | NA | NA    | NA         | NA |
| NA | NA | NA | NA | NA    | NA         | NA |
| Y  | NA | Y  |    | 6500  | 79.4426791 | NA |
| NA | NA | NA | NA | NA    | NA         | NA |
| NA | NA | NA | NA | NA    | NA         | NA |
| NA | NA | NA | NA | NA    | NA         | NA |
| NA | NA | NA | NA | NA    | NA         | NA |
| NA | NA | Y  |    | 15000 | 214.285714 | NA |
| NA | NA | NA | NA | NA    | NA         | NA |
| NA | NA | NA | NA | NA    | NA         | NA |
| NA | NA | NA | NA | NA    | NA         | NA |
| NA | NA | Y  |    | 4000  | 44.7637593 | NA |
| NA | NA | NA | NA | NA    | NA         | NA |
| NA | NA | NA | NA | NA    | NA         | NA |
| NA | NA | NA | NA | NA    | NA         | NA |
| NA | NA | NA | NA | NA    | NA         | NA |
| NA | NA | NA | NA | NA    | NA         | NA |
| NA | NA | NA | NA | NA    | NA         | NA |
| NA | NA | Y  |    | 15000 | 173.691524 | NA |
| NA | NA | NA | NA | NA    | NA         | NA |

|    |    |    |    |       |            |    |
|----|----|----|----|-------|------------|----|
| NA | NA | NA | NA | NA    | NA         | NA |
| NA | NA | NA | NA | NA    | NA         | NA |
| NA | NA | NA | NA | NA    | NA         | NA |
| NA | NA | NA | NA | NA    | NA         | NA |
| NA | NA | NA | NA | NA    | NA         | NA |
| NA | NA | NA | NA | NA    | NA         | NA |
| NA | NA | Y  |    | 15000 | 252.951096 | NA |
| NA | NA | NA | NA | NA    | NA         | NA |
| NA | NA | NA | NA | NA    | NA         | NA |
| NA | NA | NA | NA | NA    | NA         | NA |
| NA | NA | NA | NA | NA    | NA         | NA |
| NA | NA | NA | NA | NA    | NA         | NA |
| NA | NA | Y  |    | 15000 | 174.048246 | NA |
| NA | NA | NA | NA | NA    | NA         | NA |
| NA | NA | Y  |    | 15000 | 191.864927 | NA |
| NA | NA | NA | NA | NA    | NA         | NA |
| NA | NA | NA | NA | NA    | NA         | NA |
| NA | NA | NA | NA | NA    | NA         | NA |
| NA | NA | NA | NA | NA    | NA         | NA |
| NA | NA | NA | NA | NA    | NA         | NA |
| NA | NA | NA | NA | NA    | NA         | NA |
| Y  | NA | Y  |    | 12000 | 155.299599 | NA |
| NA | NA | NA | NA | NA    | NA         | NA |
| NA | NA | NA | NA | NA    | NA         | NA |
| NA | NA | NA | NA | NA    | NA         | NA |
| NA | NA | Y  |    | 15000 | 471.401634 | NA |
| NA | NA | NA | NA | NA    | NA         | NA |
| NA | NA | NA | NA | NA    | NA         | NA |
| NA | NA | NA | NA | NA    | NA         | NA |
| NA | NA | NA | NA | NA    | NA         | NA |
| NA | NA | Y  |    | 15000 | 194.124499 | NA |
| NA | NA | NA | NA | NA    | NA         | NA |
| NA | NA | NA | NA | NA    | NA         | NA |
| NA | NA | NA | NA | NA    | NA         | NA |
| NA | NA | Y  |    | 15000 | 222.982013 | NA |
| NA | NA | NA | NA | NA    | NA         | NA |
| NA | NA | NA | NA | NA    | NA         | NA |
| NA | NA | NA | NA | NA    | NA         | NA |
| NA | NA | Y  |    | 15000 | 197.602424 | NA |
| NA | NA | NA | NA | NA    | NA         | NA |
| NA | NA | NA | NA | NA    | NA         | NA |
| NA | NA | NA | NA | NA    | NA         | NA |

|    |    |    |    |       |            |    |
|----|----|----|----|-------|------------|----|
| NA | NA | NA | NA | NA    | NA         | NA |
| NA | NA | NA | NA | NA    | NA         | NA |
| NA | NA | NA | NA | NA    | NA         | NA |
| NA | NA | NA | NA | NA    | NA         | NA |
| NA | NA | Y  |    | 15000 | 340.2132   | NA |
| NA | NA | NA | NA | NA    | NA         | NA |
| NA | NA | NA | NA | NA    | NA         | NA |
| NA | NA | NA | NA | NA    | NA         | NA |
| NA | NA | NA | NA | NA    | NA         | NA |
| NA | NA | NA | NA | NA    | NA         | NA |
| NA | NA | NA | NA | NA    | NA         | NA |
| NA | NA | NA | NA | NA    | NA         | NA |
| NA | NA | NA | NA | NA    | NA         | NA |
| NA | NA | NA | NA | NA    | NA         | NA |
| NA | NA | NA | NA | NA    | NA         | NA |
| NA | NA | NA | NA | NA    | NA         | NA |
| NA | NA | NA | NA | NA    | NA         | NA |
| NA | NA | Y  |    | 15000 | 200        | NA |
| NA | NA | NA | NA | NA    | NA         | NA |
| NA | NA | NA | NA | NA    | NA         | NA |
| NA | NA | NA | NA | NA    | NA         | NA |
| NA | NA | NA | NA | NA    | NA         | NA |
| NA | NA | NA | NA | NA    | NA         | NA |
| NA | NA | NA | NA | NA    | NA         | NA |
| NA | NA | Y  |    | 10000 | 87.7192982 | NA |
| NA | NA | NA | NA | NA    | NA         | NA |
| NA | NA | NA | NA | NA    | NA         | NA |
| NA | NA | NA | NA | NA    | NA         | NA |
| Y  | NA | Y  |    | 5000  | 68.212824  | NA |
| NA | NA | NA | NA | NA    | NA         | NA |
| NA | NA | NA | NA | NA    | NA         | NA |
| NA | NA | NA | NA | NA    | NA         | NA |
| NA | NA | NA | NA | NA    | NA         | NA |
| NA | NA | NA | NA | NA    | NA         | NA |
| NA | NA | NA | NA | NA    | NA         | NA |
| NA | NA | Y  |    | 15000 | 267.857143 | NA |
| NA | NA | NA | NA | NA    | NA         | NA |
| NA | NA | NA | NA | NA    | NA         | NA |
| NA | NA | NA | NA | NA    | NA         | NA |
| Y  | NA | Y  |    | 2900  | 41.2517781 | NA |
| NA | NA | Y  |    | 15000 | 212.916962 | NA |
| NA | NA | Y  |    | 15000 | 194.124499 | NA |
| NA | NA | NA | NA | NA    | NA         | NA |
| NA | NA | NA | NA | NA    | NA         | NA |

|    |    |    |    |       |            |    |
|----|----|----|----|-------|------------|----|
| NA | NA | NA | NA | NA    | NA         | NA |
| NA | NA | NA | NA | NA    | NA         | NA |
| NA | NA | NA | NA | NA    | NA         | NA |
| NA | NA | NA | NA | NA    | NA         | NA |
| NA | NA | NA | NA | NA    | NA         | NA |
| NA | NA | NA | NA | NA    | NA         | NA |
| NA | NA | NA | NA | NA    | NA         | NA |
| NA | NA | NA | NA | NA    | NA         | NA |
| NA | NA | NA | NA | NA    | NA         | NA |
| NA | NA | NA | NA | NA    | NA         | NA |
| NA | NA | NA | NA | NA    | NA         | NA |
| NA | NA | NA | NA | NA    | NA         | NA |
| NA | NA | NA | NA | NA    | NA         | NA |
| NA | NA | NA | NA | NA    | NA         | NA |
| NA | NA | NA | NA | NA    | NA         | NA |
| NA | NA | NA | NA | NA    | NA         | NA |
| NA | NA | NA | NA | NA    | NA         | NA |
| NA | NA | NA | NA | NA    | NA         | NA |
| NA | NA | Y  |    | 15000 | 188.560654 | NA |
| NA | NA | NA | NA | NA    | NA         | NA |
| NA | NA | NA | NA | NA    | NA         | NA |
| NA | NA | NA | NA | NA    | NA         | NA |
| NA | NA | NA | NA | NA    | NA         | NA |
| NA | NA | Y  |    | 15000 | 200.534759 | NA |
| NA | NA | NA | NA | NA    | NA         | NA |
| NA | NA | NA | NA | NA    | NA         | NA |
| NA | NA | NA | NA | NA    | NA         | NA |
| NA | NA | NA | NA | NA    | NA         | NA |
| NA | NA | NA | NA | NA    | NA         | NA |
| NA | NA | NA | NA | NA    | NA         | NA |
| Y  | NA | Y  |    | 8200  | 80.3464697 | NA |
| NA | NA | NA | NA | NA    | NA         | NA |
| NA | NA | NA | NA | NA    | NA         | NA |
| NA | NA | Y  |    | 15000 | 197.368421 | NA |
| NA | NA | NA | NA | NA    | NA         | NA |
| NA | NA | Y  |    | 10000 | 140.421827 | NA |
| NA | NA | Y  |    | 15000 | 323.554789 | NA |
| NA | NA | NA | NA | NA    | NA         | NA |
| NA | NA | NA | NA | NA    | NA         | NA |
| NA | NA | NA | NA | NA    | NA         | NA |
| NA | NA | NA | NA | NA    | NA         | NA |
| NA | NA | NA | NA | NA    | NA         | NA |
| NA | NA | NA | NA | NA    | NA         | NA |
| NA | NA | NA | NA | NA    | NA         | NA |
| NA | NA | Y  |    | 10000 | 156.25     | NA |



|    |    |    |    |       |            |    |
|----|----|----|----|-------|------------|----|
| NA | NA | NA | NA | NA    | NA         | NA |
| NA | NA | NA | NA | NA    | NA         | NA |
| Y  | NA | Y  |    | 3000  | 38.8248997 | NA |
| NA | NA | NA | NA | NA    | NA         | NA |
| NA | NA | NA | NA | NA    | NA         | NA |
| NA | NA | Y  |    | 15000 | 274.977085 | NA |
| NA | NA | NA | NA | NA    | NA         | NA |
| NA | NA | Y  |    | 15000 | 161.117078 | NA |
| NA | NA | NA | NA | NA    | NA         | NA |
| NA | NA | NA | NA | NA    | NA         | NA |
| NA | NA | NA | NA | NA    | NA         | NA |
| NA | NA | NA | NA | NA    | NA         | NA |
| NA | NA | NA | NA | NA    | NA         | NA |
| Y  | NA | Y  |    | 9300  | 117.572693 | NA |
| NA | NA | NA | NA | NA    | NA         | NA |
| NA | NA | NA | NA | NA    | NA         | NA |
| NA | NA | Y  |    | 15000 | 253.378378 | NA |
| NA | NA | NA | NA | NA    | NA         | NA |
| NA | NA | NA | NA | NA    | NA         | NA |
| NA | NA | NA | NA | NA    | NA         | NA |
| NA | NA | NA | NA | NA    | NA         | NA |
| NA | NA | NA | NA | NA    | NA         | NA |
| NA | NA | NA | NA | NA    | NA         | NA |
| NA | NA | NA | NA | NA    | NA         | NA |
| NA | NA | NA | NA | NA    | NA         | NA |
| NA | NA | NA | NA | NA    | NA         | NA |
| NA | NA | NA | NA | NA    | NA         | NA |
| NA | NA | NA | NA | NA    | NA         | NA |
| NA | NA | NA | NA | NA    | NA         | NA |
| NA | NA | Y  |    | 15000 | 189.657352 | NA |
| NA | NA | Y  |    | 15000 | 159.574468 | NA |
| NA | NA | Y  |    | 10000 | 106.28122  | NA |
| NA | NA | NA | NA | NA    | NA         | NA |
| NA | NA | Y  |    | 15000 | 194.524776 | NA |
| NA | NA | NA | NA | NA    | NA         | NA |
| NA | NA | NA | NA | NA    | NA         | NA |
| Y  | NA | Y  |    | 5200  |            | 80 |
| NA | NA | NA | NA | NA    | NA         | NA |
| NA | NA | NA | NA | NA    | NA         | NA |
| NA | NA | NA | NA | NA    | NA         | NA |
| NA | NA | NA | NA | NA    | NA         | NA |
| NA | NA | Y  |    | 15000 | 166.666667 | NA |
| NA | NA | NA | NA | NA    | NA         | NA |
| NA | NA | NA | NA | NA    | NA         | NA |
| NA | NA | Y  |    | 15000 | 236.209313 | NA |
| NA | NA | NA | NA | NA    | NA         | NA |



|    |    |    |    |       |            |    |
|----|----|----|----|-------|------------|----|
| NA | NA | NA | NA | NA    | NA         | NA |
| NA | NA | NA | NA | NA    | NA         | NA |
| NA | NA | NA | NA | NA    | NA         | NA |
| NA | NA | NA | NA | NA    | NA         | NA |
| NA | NA | NA | NA | NA    | NA         | NA |
| NA | NA | NA | NA | NA    | NA         | NA |
| NA | NA | NA | NA | NA    | NA         | NA |
| NA | NA | NA | NA | NA    | NA         | NA |
| NA | NA | Y  |    | 15000 | 185.391175 | NA |
| NA | NA | NA | NA | NA    | NA         | NA |
| NA | NA | NA | NA | NA    | NA         | NA |
| NA | NA | NA | NA | NA    | NA         | NA |
| NA | NA | NA | NA | NA    | NA         | NA |
| NA | NA | NA | NA | NA    | NA         | NA |
| NA | NA | NA | NA | NA    | NA         | NA |
| NA | NA | NA | NA | NA    | NA         | NA |
| Y  | NA | NA | NA | NA    | NA         | NA |
| NA | NA | NA | NA | NA    | NA         | NA |
| NA | NA | NA | NA | NA    | NA         | NA |
| NA | NA | NA | NA | NA    | NA         | NA |
| NA | NA | NA | NA | NA    | NA         | NA |
| NA | NA | NA | NA | NA    | NA         | NA |
| NA | NA | NA | NA | NA    | NA         | NA |
| NA | NA | NA | NA | NA    | NA         | NA |
| NA | NA | Y  |    | 15000 | 144.927536 | NA |
| NA | NA | NA | NA | NA    | NA         | NA |
| NA | NA | NA | NA | NA    | NA         | NA |
| NA | NA | NA | NA | NA    | NA         | NA |
| NA | NA | NA | NA | NA    | NA         | NA |
| NA | NA | NA | NA | NA    | NA         | NA |
| NA | NA | NA | NA | NA    | NA         | NA |
| NA | NA | NA | NA | NA    | NA         | NA |
| NA | NA | Y  |    | 15000 | 201.207243 | NA |
| NA | NA | NA | NA | NA    | NA         | NA |
| NA | NA | NA | NA | NA    | NA         | NA |
| NA | NA | Y  |    | 15000 | 235.700817 | NA |
| NA | NA | NA | NA | NA    | NA         | NA |
| NA | NA | NA | NA | NA    | NA         | NA |
| NA | NA | NA | NA | NA    | NA         | NA |
| NA | NA | NA | NA | NA    | NA         | NA |
| Y  | NA | Y  |    | 15000 | 140.720866 | NA |
| NA | NA | NA | NA | NA    | NA         | NA |
| NA | NA | NA | NA | NA    | NA         | NA |
| NA | NA | Y  |    | 15000 | 236.209313 | NA |
| NA | NA | NA | NA | NA    | NA         | NA |
| NA | NA | NA | NA | NA    | NA         | NA |





|    |    |    |    |       |            |    |    |
|----|----|----|----|-------|------------|----|----|
| NA | NA | NA | NA | NA    | NA         | NA |    |
| NA | NA | NA | NA | NA    | NA         | NA |    |
| NA | NA | NA | NA | NA    | NA         | NA |    |
| NA | NA | NA | NA | NA    | NA         | NA |    |
| NA | NA | NA | NA | NA    | NA         | NA |    |
| NA | NA | NA | NA | NA    | NA         | NA |    |
| NA | NA | NA | NA | NA    | NA         | NA |    |
| NA | NA | NA | NA | NA    | NA         | NA |    |
| NA | NA | NA | NA | NA    | NA         | NA |    |
| NA | NA | NA | NA | NA    | NA         | NA |    |
| NA | NA | NA | NA | NA    | NA         | NA |    |
| NA | NA | Y  |    | 15000 | 156.5762   | NA | Y  |
| NA | NA | Y  |    | 15000 | 238.095238 | NA | NA |
| NA | NA | NA | NA | NA    | NA         | NA | NA |
| NA | NA | NA | NA | NA    | NA         | NA | NA |
| NA | NA | NA | NA | NA    | NA         | NA | NA |
| NA | NA | NA | NA | NA    | NA         | NA | NA |
| NA | NA | Y  |    | 5000  | 64.7081662 | NA | NA |
| NA | NA | NA | NA | NA    | NA         | NA | NA |
| NA | NA | NA | NA | NA    | NA         | NA | NA |
| NA | NA | NA | NA | NA    | NA         | NA | NA |
| NA | NA | Y  |    | 15000 | 264.084507 | NA | NA |
| NA | NA | NA | NA | NA    | NA         | NA | NA |
| NA | NA | NA | NA | NA    | NA         | NA | NA |
| NA | NA | NA | NA | NA    | NA         | NA | NA |
| NA | NA | NA | NA | NA    | NA         | NA | NA |
| NA | NA | NA | NA | NA    | NA         | NA | NA |
| NA | NA | NA | NA | NA    | NA         | NA | NA |
| NA | NA | Y  |    | 5000  | 78.566939  | NA | NA |
| NA | NA | NA | NA | NA    | NA         | NA | NA |
| NA | NA | Y  |    | 5000  | 78.566939  | NA | NA |
| NA | NA | NA | NA | NA    | NA         | NA | NA |
| NA | NA | Y  |    | 15000 | 214.285714 | NA | NA |
| NA | NA | NA | NA | NA    | NA         | NA | NA |
| NA | NA | NA | NA | NA    | NA         | NA | NA |
| NA | NA | NA | NA | NA    | NA         | NA | NA |
| Y  | NA | NA | NA | NA    | NA         | NA | NA |
| NA | NA | NA | NA | NA    | NA         | NA | NA |
| NA | NA | NA | NA | NA    | NA         | NA | NA |
| NA | NA | NA | NA | NA    | NA         | NA | NA |
| NA | NA | NA | NA | NA    | NA         | NA | NA |
| NA | NA | Y  |    | 15000 | 178.380307 | NA | NA |
| NA | NA | NA | NA | NA    | NA         | NA | NA |
| NA | NA | NA | NA | NA    | NA         | NA | NA |
| NA | NA | Y  |    | 15000 | 184.365782 | NA | NA |

|    |    |    |    |       |            |    |
|----|----|----|----|-------|------------|----|
| NA | NA | NA | NA | NA    | NA         | NA |
| NA | NA | Y  |    | 15000 | 235.700817 | NA |
| NA | NA | Y  |    | 15000 | 165.347561 | NA |
| NA | NA | Y  |    | 5000  | 61.2392372 | NA |
| Y  | NA | Y  |    | 12000 | 159.371016 | NA |
| NA | NA | NA | NA | NA    | NA         | NA |
| NA | NA | NA | NA | NA    | NA         | NA |



























































|    |    |    |    |    |    |    |   |
|----|----|----|----|----|----|----|---|
| NA | NA | NA | NA | NA | NA | NA |   |
| NA | NA | NA | NA | NA | NA | NA |   |
| NA | NA | NA | NA | NA | NA | NA |   |
| NA | NA | NA | NA | NA | NA | NA |   |
| NA | NA | NA | NA | Y  |    | 50 | 1 |
| NA | NA | NA | NA | NA | NA | NA |   |
| NA | NA | NA | NA | NA | NA | NA |   |











|            |    |     |    |     |     |        |
|------------|----|-----|----|-----|-----|--------|
| NA         | NA | NA  | NA | NA  | NA  | NA     |
| NA         | NA | NA  | NA | NA  | NA  | NA     |
| NA         | NA | NA  | NA | NA  | NA  | NA     |
| NA         | NA | NA  | NA | NA  | NA  | NA     |
| NA         | NA | NA  | NA | NA  | NA  | NA     |
| NA         | NA | NA  | NA | NA  | NA  | NA     |
| NA         | NA | NA  | NA | NA  | NA  | NA     |
| NA         | NA | NA  | NA | NA  | NA  | NA     |
| NA         | NA | NA  | NA | NA  | NA  | NA     |
| NA         | NA | NA  | NA | NA  | NA  | NA     |
| NA         | NA | NA  | NA | NA  | NA  | NA     |
| NA         | NA | NA  | NA | NA  | NA  | NA     |
| NA         | NA | NA  | NA | NA  | NA  | NA     |
| NA         | NA | NA  | NA | NA  | NA  | NA     |
| NA         | NA | NA  | NA | NA  | NA  | NA     |
| NA         | NA | NA  | NA | NA  | NA  | NA     |
| NA         | NA | NA  | NA | NA  | NA  | NA     |
| NA         | NA | NA  | NA | NA  | NA  | NA     |
| NA         | NA | NA  | NA | NA  | NA  | NA     |
| NA         | NA | NA  | NA | NA  | NA  | NA     |
| NA         | NA | NA  | NA | NA  | NA  | NA     |
| NA         | NA | NA  | NA | NA  | NA  | NA     |
| NA         | NA | NA  | NA | NA  | NA  | NA     |
| 2.58832665 |    | 200 | NA | NA  | NA  | NA     |
| NA         | NA | NA  | NA | NA  | NA  | NA     |
| NA         | NA | NA  | NA | NA  | NA  | NA     |
| NA         | NA | NA  | NA | NA  | NA  | NA     |
| NA         | NA | NA  | NA | NA  | NA  | NA     |
| NA         | NA | NA  | NA | NA  | NA  | NA     |
| NA         | NA | NA  | NA | NA  | NA  | NA     |
| NA         | NA | NA  | NA | NA  | NA  | NA     |
| NA         | NA | NA  | NA | NA  | NA  | NA     |
| NA         | NA | NA  | NA | NA  | NA  | NA     |
| NA         | NA | NA  | NA | NA  | NA  | NA     |
| NA         | NA | NA  | NA | NA  | NA  | NA     |
| NA         | NA | Y   |    | 120 | 1.6 | 120 NA |
| NA         | NA | NA  | NA | NA  | NA  | NA     |
| NA         | NA | NA  | NA | NA  | NA  | NA     |
| NA         | NA | NA  | NA | NA  | NA  | NA     |



















|    |    |    |    |     |            |        |
|----|----|----|----|-----|------------|--------|
| NA | NA | NA | NA | NA  | NA         | NA     |
| NA | NA | NA | NA | NA  | NA         | NA     |
| NA | NA | NA | NA | NA  | NA         | NA     |
| NA | NA | NA | NA | NA  | NA         | NA     |
| NA | NA | NA | NA | NA  | NA         | NA     |
| NA | NA | NA | NA | NA  | NA         | NA     |
| NA | NA | NA | NA | NA  | NA         | NA     |
| NA | NA | NA | NA | NA  | NA         | NA     |
| NA | NA | NA | NA | NA  | NA         | NA     |
| NA | NA | NA | NA | NA  | NA         | NA     |
| NA | NA | NA | NA | NA  | NA         | NA     |
| NA | NA | NA | NA | NA  | NA         | NA     |
| NA | NA | NA | NA | NA  | NA         | NA     |
| NA | NA | NA | NA | NA  | NA         | NA     |
| NA | NA | NA | NA | NA  | NA         | NA     |
| NA | NA | NA | NA | NA  | NA         | NA     |
| NA | NA | NA | NA | NA  | NA         | NA     |
| NA | NA | NA | NA | NA  | NA         | NA     |
| NA | NA | NA | NA | NA  | NA         | NA     |
| NA | NA | NA | NA | NA  | NA         | NA     |
| NA | NA | NA | NA | NA  | NA         | NA     |
| NA | NA | NA | NA | NA  | NA         | NA     |
| NA | NA | NA | NA | NA  | NA         | NA     |
| NA | NA | Y  |    | 60  | 0.96       | 420 Y  |
| NA | NA | NA | NA | NA  | NA         | NA     |
| NA | NA | NA | NA | NA  | NA         | NA     |
| NA | NA | NA | NA | NA  | NA         | NA     |
| NA | NA | NA | NA | NA  | NA         | Y      |
| NA | NA | NA | NA | NA  | NA         | NA     |
| NA | NA | NA | NA | NA  | NA         | NA     |
| NA | NA | Y  |    | 80  | 0.98328417 | 360 Y  |
| NA | NA | NA | NA | NA  | NA         | NA     |
| NA | NA | NA | NA | NA  | NA         | NA     |
| NA | NA | NA | NA | NA  | NA         | NA     |
| NA | NA | NA | NA | NA  | NA         | NA     |
| NA | NA | NA | NA | NA  | NA         | NA     |
| NA | NA | Y  |    | 125 | 1.39664804 | 125 NA |
| NA | NA | NA | NA | NA  | NA         | NA     |
| NA | NA | NA | NA | NA  | NA         | NA     |

|            |    |       |    |     |            |        |
|------------|----|-------|----|-----|------------|--------|
| NA         | NA | NA    | NA | NA  | NA         | NA     |
| NA         | NA | NA    | NA | NA  | NA         | NA     |
| NA         | NA | NA    | NA | NA  | NA         | NA     |
| NA         | NA | NA    | NA | NA  | NA         | NA     |
| NA         | NA | NA    | NA | NA  | NA         | NA     |
| NA         | NA | NA    | NA | NA  | NA         | NA     |
| NA         | NA | Y     |    | 125 | 1.37789634 | 125 Y  |
| NA         | NA | NA    | NA | NA  | NA         | NA     |
| NA         | NA | NA    | NA | NA  | NA         | NA     |
| NA         | NA | NA    | NA | NA  | NA         | NA     |
| NA         | NA | NA    | NA | NA  | NA         | NA     |
| NA         | NA | NA    | NA | NA  | NA         | NA     |
| NA         | NA | NA    | NA | NA  | NA         | NA     |
| NA         | NA | NA    | NA | NA  | NA         | NA     |
| NA         | NA | NA    | NA | NA  | NA         | NA     |
| NA         | NA | NA    | NA | NA  | NA         | NA     |
| NA         | NA | NA    | NA | NA  | NA         | NA     |
| NA         | NA | NA    | NA | NA  | NA         | NA     |
| NA         | NA | NA    | NA | NA  | NA         | NA     |
| NA         | NA | NA    | NA | NA  | NA         | NA     |
| NA         | NA | NA    | NA | NA  | NA         | NA     |
| NA         | NA | NA    | NA | NA  | NA         | NA     |
| NA         | NA | NA    | NA | NA  | NA         | NA     |
| 1.88857413 |    | 300 Y |    | 40  | 0.37771483 | 40 NA  |
| NA         | NA | NA    | NA | NA  | NA         | NA     |
| NA         | NA | NA    | NA | NA  | NA         | NA     |
| NA         | NA | NA    | NA | NA  | NA         | NA     |
| NA         | NA | NA    | NA | NA  | NA         | NA     |
| NA         | NA | NA    | NA | NA  | NA         | NA     |
| NA         | NA | NA    | NA | NA  | NA         | NA     |
| NA         | NA | NA    | NA | NA  | NA         | NA     |
| NA         | NA | NA    | NA | NA  | NA         | NA     |
| NA         | NA | Y     |    | 80  | 0.9798278  | 80 NA  |
| NA         | NA | NA    | NA | NA  | NA         | NA     |
| NA         | NA | NA    | NA | NA  | NA         | NA     |
| NA         | NA | NA    | NA | NA  | NA         | NA     |
| NA         | NA | NA    | NA | NA  | NA         | NA     |
| NA         | NA | NA    | NA | NA  | NA         | NA     |
| NA         | NA | NA    | NA | NA  | NA         | NA     |
| NA         | NA | Y     |    | 125 | 0.86117809 | 125 NA |
| NA         | NA | NA    | NA | NA  | NA         | NA     |
| NA         | NA | NA    | NA | NA  | NA         | NA     |
| NA         | NA | NA    | NA | NA  | NA         | NA     |
| NA         | NA | NA    | NA | NA  | NA         | NA     |
| NA         | NA | NA    | NA | NA  | NA         | NA     |







|            |    |       |    |                |    |        |
|------------|----|-------|----|----------------|----|--------|
| NA         | NA | NA    | NA | NA             | NA | NA     |
| NA         | NA | NA    | NA | NA             | NA | NA     |
| NA         | NA | NA    | NA | NA             | NA | NA     |
| NA         | NA | NA    | NA | NA             | NA | NA     |
| NA         | NA | NA    | NA | NA             | NA | NA     |
| NA         | NA | NA    | NA | NA             | NA | NA     |
| NA         | NA | NA    | NA | NA             | NA | NA     |
| NA         | NA | NA    | NA | NA             | NA | NA     |
| NA         | NA | NA    | NA | NA             | NA | NA     |
| NA         | NA | NA    | NA | NA             | NA | NA     |
| NA         | NA | NA    | NA | NA             | NA | NA     |
| NA         | NA | NA    | NA | NA             | NA | NA     |
| NA         | NA | NA    | NA | NA             | NA | NA     |
| NA         | NA | NA    | NA | NA             | NA | NA     |
| NA         | NA | NA    | NA | NA             | NA | NA     |
| NA         | NA | NA    | NA | NA             | NA | NA     |
| NA         | NA | NA    | NA | NA             | NA | NA     |
| NA         | NA | NA    | NA | NA             | NA | NA     |
| NA         | NA | NA    | NA | NA             | NA | NA     |
| NA         | NA | NA    | NA | NA             | NA | NA     |
| NA         | NA | NA    | NA | NA             | NA | NA     |
| 2.58832665 |    | 650 Y |    | 120 1.55299599 |    | 80 NA  |
| NA         | NA | NA    | NA | NA             | NA | NA     |
| NA         | NA | NA    | NA | NA             | NA | NA     |
| NA         | NA | NA    | NA | NA             | NA | NA     |
| NA         | NA | NA    | NA | NA             | NA | NA     |
| NA         | NA | NA    | NA | NA             | NA | NA     |
| NA         | NA | NA    | NA | NA             | NA | NA     |
| NA         | NA | NA    | NA | NA             | NA | NA     |
| NA         | NA | NA    | NA | NA             | NA | NA     |
| NA         | NA | NA    | NA | NA             | NA | NA     |
| NA         | NA | NA    | NA | NA             | NA | Y      |
| NA         | NA | NA    | NA | NA             | NA | NA     |
| NA         | NA | NA    | NA | NA             | NA | NA     |
| NA         | NA | NA    | NA | NA             | NA | NA     |
| NA         | NA | NA    | NA | NA             | NA | NA     |
| NA         | NA | NA    | NA | NA             | NA | NA     |
| NA         | NA | NA    | NA | NA             | NA | NA     |
| NA         | NA | NA    | NA | NA             | NA | NA     |
| NA         | NA | NA    | NA | NA             | NA | NA     |
| NA         | NA | Y     |    | 120 1.58081939 |    | 320 NA |
| NA         | NA | NA    | NA | NA             | NA | NA     |
| NA         | NA | NA    | NA | NA             | NA | NA     |
| NA         | NA | NA    | NA | NA             | NA | NA     |

|            |    |    |    |    |            |        |
|------------|----|----|----|----|------------|--------|
| NA         | NA | NA | NA | NA | NA         | NA     |
| NA         | NA | NA | NA | NA | NA         | NA     |
| NA         | NA | NA | NA | NA | NA         | NA     |
| NA         | NA | NA | NA | NA | NA         | NA     |
| NA         | NA | NA | NA | NA | NA         | NA     |
| NA         | NA | NA | NA | NA | NA         | NA     |
| NA         | NA | NA | NA | NA | NA         | NA     |
| NA         | NA | NA | NA | NA | NA         | NA     |
| NA         | NA | NA | NA | NA | NA         | NA     |
| 0.78740157 |    | 50 | NA | NA | NA         | NA     |
| NA         | NA | NA | NA | NA | NA         | NA     |
| NA         | NA | NA | NA | NA | NA         | NA     |
| NA         | NA | NA | NA | NA | NA         | NA     |
| NA         | NA | NA | NA | NA | NA         | NA     |
| NA         | NA | NA | NA | NA | NA         | NA     |
| NA         | NA | NA | NA | NA | NA         | NA     |
| NA         | NA | NA | NA | NA | NA         | NA     |
| NA         | NA | NA | NA | NA | NA         | NA     |
| NA         | NA | NA | NA | NA | NA         | NA     |
| NA         | NA | NA | NA | NA | NA         | NA     |
| NA         | NA | NA | NA | NA | NA         | NA     |
| NA         | NA | NA | NA | NA | NA         | NA     |
| NA         | NA | NA | NA | NA | NA         | NA     |
| NA         | NA | NA | NA | NA | NA         | NA     |
| NA         | NA | NA | NA | NA | NA         | NA     |
| NA         | NA | NA | NA | NA | NA         | NA     |
| NA         | NA | NA | NA | NA | NA         | NA     |
| NA         | NA | NA | NA | NA | NA         | NA     |
| NA         | NA | NA | NA | NA | NA         | NA     |
| NA         | NA | NA | NA | NA | NA         | NA     |
| NA         | NA | NA | NA | NA | NA         | NA     |
| NA         | NA | NA | NA | NA | NA         | NA     |
| NA         | NA | NA | NA | NA | NA         | NA     |
| NA         | NA | NA | NA | NA | NA         | NA     |
| NA         | NA | NA | NA | NA | NA         | NA     |
| NA         | NA | NA | NA | NA | NA         | NA     |
| NA         | NA | NA | NA | NA | NA         | NA     |
| NA         | NA | NA | NA | NA | NA         | NA     |
| NA         | NA | NA | NA | NA | NA         | NA     |
| NA         | NA | NA | NA | NA | NA         | NA     |
| NA         | NA | NA | NA | NA | NA         | NA     |
| NA         | NA | NA | NA | NA | NA         | NA     |
| NA         | NA | Y  |    | 60 | 0.85348506 | 300 NA |
| NA         | NA | NA | NA | NA | NA         | NA     |
| NA         | NA | NA | NA | NA | NA         | NA     |
| NA         | NA | NA | NA | NA | NA         | NA     |
| NA         | NA | NA | NA | NA | NA         | NA     |
| NA         | NA | NA | NA | NA | NA         | NA     |



|            |    |     |    |     |            |        |
|------------|----|-----|----|-----|------------|--------|
| NA         | NA | NA  | NA | NA  | NA         | NA     |
| NA         | NA | NA  | NA | NA  | NA         | NA     |
| NA         | NA | NA  | NA | NA  | NA         | NA     |
| NA         | NA | NA  | NA | NA  | NA         | NA     |
| NA         | NA | NA  | NA | NA  | NA         | NA     |
| NA         | NA | NA  | NA | NA  | NA         | NA     |
| NA         | NA | NA  | NA | NA  | NA         | NA     |
| NA         | NA | NA  | NA | NA  | NA         | NA     |
| NA         | NA | NA  | NA | NA  | NA         | NA     |
| NA         | NA | NA  | NA | NA  | NA         | NA     |
| NA         | NA | NA  | NA | NA  | NA         | NA     |
| NA         | NA | NA  | NA | NA  | NA         | NA     |
| NA         | NA | NA  | NA | NA  | NA         | NA     |
| NA         | NA | NA  | NA | NA  | NA         | NA     |
| NA         | NA | NA  | NA | NA  | NA         | NA     |
| NA         | NA | NA  | NA | NA  | NA         | NA     |
| NA         | NA | NA  | NA | NA  | NA         | NA     |
| NA         | NA | NA  | NA | NA  | NA         | NA     |
| NA         | NA | NA  | NA | NA  | NA         | NA     |
| NA         | NA | NA  | NA | NA  | NA         | NA     |
| NA         | NA | NA  | NA | NA  | NA         | NA     |
| NA         | NA | NA  | NA | NA  | NA         | NA     |
| 1.25715004 |    | 550 | NA | NA  | NA         | NA     |
| NA         | NA | NA  | NA | NA  | NA         | NA     |
| NA         | NA | NA  | NA | NA  | NA         | NA     |
| NA         | NA | NA  | NA | NA  | NA         | NA     |
| NA         | NA | NA  | NA | NA  | NA         | NA     |
| NA         | NA | NA  | NA | NA  | NA         | NA     |
| NA         | NA | NA  | NA | NA  | NA         | NA     |
| NA         | NA | NA  | NA | NA  | NA         | NA     |
| NA         | NA | NA  | NA | NA  | NA         | NA     |
| NA         | NA | NA  | NA | NA  | NA         | NA     |
| NA         | NA | NA  | NA | NA  | NA         | NA     |
| NA         | NA | NA  | NA | NA  | NA         | NA     |
| NA         | NA | NA  | NA | NA  | NA         | NA     |
| NA         | NA | NA  | NA | NA  | NA         | NA     |
| NA         | NA | NA  | NA | NA  | NA         | NA     |
| NA         | NA | NA  | NA | NA  | NA         | NA     |
| NA         | NA | NA  | NA | NA  | NA         | NA     |
| 2.20463414 |    | 300 | NA | NA  | NA         | NA     |
| NA         | NA | NA  | NA | NA  | NA         | NA     |
| NA         | NA | NA  | NA | NA  | NA         | NA     |
| NA         | NA | NA  | NA | NA  | NA         | NA     |
| NA         | NA | NA  | NA | NA  | NA         | NA     |
| NA         | NA | NA  | NA | NA  | NA         | NA     |
| NA         | NA | NA  | NA | NA  | NA         | NA     |
| NA         | NA | NA  | NA | NA  | NA         | NA     |
| NA         | NA | NA  | NA | NA  | NA         | NA     |
| NA         | NA | Y   |    | 160 | 1.85270959 | 680 NA |





|    |    |    |    |                |    |        |
|----|----|----|----|----------------|----|--------|
| NA | NA | NA | NA | NA             | NA | NA     |
| NA | NA | NA | NA | NA             | NA | NA     |
| NA | NA | NA | NA | NA             | NA | NA     |
| NA | NA | NA | NA | NA             | NA | NA     |
| NA | NA | NA | NA | NA             | NA | NA     |
| NA | NA | NA | NA | NA             | NA | NA     |
| NA | NA | NA | NA | NA             | NA | NA     |
| NA | NA | NA | NA | NA             | NA | NA     |
| NA | NA | NA | NA | NA             | NA | NA     |
| NA | NA | NA | NA | NA             | NA | NA     |
| NA | NA | Y  |    | 40 0.70397747  |    | 80 Y   |
| NA | NA | NA | NA | NA             | NA | NA     |
| NA | NA | NA | NA | NA             | NA | NA     |
| NA | NA | NA | NA | NA             | NA | NA     |
| NA | NA | NA | NA | NA             | NA | NA     |
| NA | NA | NA | NA | NA             | NA | NA     |
| NA | NA | NA | NA | NA             | NA | NA     |
| NA | NA | NA | NA | NA             | NA | NA     |
| NA | NA | NA | NA | NA             | NA | NA     |
| NA | NA | NA | NA | NA             | NA | Y      |
| NA | NA | NA | NA | NA             | NA | NA     |
| NA | NA | NA | NA | NA             | NA | NA     |
| NA | NA | NA | NA | NA             | NA | NA     |
| NA | NA | NA | NA | NA             | NA | NA     |
| NA | NA | NA | NA | NA             | NA | NA     |
| NA | NA | NA | NA | NA             | NA | NA     |
| NA | NA | NA | NA | NA             | NA | NA     |
| NA | NA | NA | NA | NA             | NA | NA     |
| NA | NA | NA | NA | NA             | NA | NA     |
| NA | NA | NA | NA | NA             | NA | NA     |
| NA | NA | NA | NA | NA             | NA | NA     |
| NA | NA | NA | NA | NA             | NA | NA     |
| NA | NA | NA | NA | NA             | NA | NA     |
| NA | NA | NA | NA | NA             | NA | NA     |
| NA | NA | Y  |    | 125 1.19600057 |    | 750 NA |
| NA | NA | NA | NA | NA             | NA | NA     |
| NA | NA | Y  |    | 50 0.61109753  |    | 200 Y  |
| NA | NA | NA | NA | NA             | NA | NA     |
| NA | NA | NA | NA | NA             | NA | NA     |
| NA | NA | NA | NA | NA             | NA | NA     |
| NA | NA | NA | NA | NA             | NA | NA     |
| NA | NA | NA | NA | NA             | NA | NA     |
| NA | NA | NA | NA | NA             | NA | NA     |
| NA | NA | NA | NA | NA             | NA | NA     |
| NA | NA | NA | NA | NA             | NA | NA     |
| NA | NA | NA | NA | NA             | NA | Y      |
| NA | NA | NA | NA | NA             | NA | NA     |







|           |    |    |    |    |           |      |
|-----------|----|----|----|----|-----------|------|
| NA        | NA | NA | NA | NA | NA        | NA   |
| NA        | NA | NA | NA | NA | NA        | NA   |
| NA        | NA | NA | NA | NA | NA        | NA   |
| NA        | NA | Y  |    | 80 | 0.9798278 | 80 Y |
| 0.6640459 |    | 50 | NA | NA | NA        | NA   |
| NA        | NA | NA | NA | NA | NA        | NA   |
| NA        | NA | NA | NA | NA | NA        | NA   |







|       |    |    |    |    |    |     |     |
|-------|----|----|----|----|----|-----|-----|
| NA    | NA | NA | NA | NA | NA | NA  |     |
| NA    | NA | NA | NA | NA | NA | NA  |     |
| NA    | NA | NA | NA | NA | NA | NA  |     |
| NA    | NA | NA | NA | NA | NA | NA  |     |
| NA    | NA | NA | NA | NA | NA | NA  |     |
| NA    | NA | NA | NA | NA | NA | NA  |     |
| NA    | NA | NA | NA | NA | NA | NA  |     |
| 10 MG |    | 10 | NA | NA | NA | NA  |     |
| NA    | NA | NA | NA | NA | NA | NA  |     |
| NA    | NA | NA | NA | NA | NA | NA  |     |
| NA    | NA | NA | NA | NA | NA | NA  |     |
| NA    | NA | NA | NA | NA | NA | NA  |     |
| NA    | NA | NA | NA | NA | NA | NA  |     |
| NA    | NA | NA | NA | NA | NA | NA  |     |
| NA    | NA | NA | NA | NA | NA | NA  |     |
| NA    | NA | NA | NA | NA | NA | NA  |     |
| NA    | NA | NA | NA | NA | NA | NA  |     |
| NA    | NA | NA | NA | NA | NA | NA  |     |
| NA    | NA | NA | NA | NA | NA | NA  |     |
| NA    | NA | NA | NA | NA | NA | NA  |     |
| NA    | NA | NA | NA | NA | NA | NA  |     |
| NA    | NA | NA | NA | NA | NA | NA  |     |
| NA    | NA | NA | NA | NA | NA | NA  |     |
| NA    | NA | NA | NA | NA | NA | NA  |     |
| NA    | NA | NA | NA | NA | NA | NA  |     |
| NA    | NA | NA | NA | NA | NA | NA  |     |
| NA    | NA | NA | NA | NA | NA | NA  |     |
| NA    | NA | NA | NA | NA | NA | NA  |     |
| NA    | NA | NA | NA | NA | NA | NA  |     |
| NA    | NA | NA | NA | NA | NA | NA  |     |
| NA    | NA | NA | NA | NA | NA | NA  |     |
| NA    | NA | NA | NA | NA | NA | NA  |     |
| NA    | NA | NA | NA | NA | NA | NA  |     |
| NA    | NA | NA | NA | NA | NA | NA  |     |
| NA    | NA | NA | NA | NA | NA | NA  |     |
| NA    | NA | NA | NA | NA | NA | NA  |     |
| NA    | NA | NA | NA | NA | NA | NA  |     |
| NA    | NA | NA | NA | NA | NA | NA  |     |
| NA    | NA | NA | NA | NA | NA | NA  |     |
| 10 MG |    | 10 | NA | NA | NA | NA  |     |
| NA    | NA | NA | y  |    | 20 | 200 | 200 |
| NA    | NA | NA | NA | NA | NA | NA  |     |
| NA    | NA | NA | NA | NA | NA | NA  |     |
| NA    | NA | NA | NA | NA | NA | NA  |     |
| NA    | NA | NA | NA | NA | NA | NA  |     |
| NA    | NA | NA | NA | NA | NA | NA  |     |
| NA    | NA | Y  | NA | NA | NA | NA  |     |
| NA    | NA | NA | NA | NA | NA | NA  |     |







|       |    |    |    |    |    |     |     |
|-------|----|----|----|----|----|-----|-----|
| NA    | NA | NA | NA | NA | NA | NA  |     |
| NA    | NA | NA | NA | NA | NA | NA  |     |
| NA    | NA | NA | NA | NA | NA | NA  |     |
| 20 MG |    | 20 | NA | NA | NA | NA  |     |
| NA    | NA | NA | y  |    | 20 | 140 | 140 |
| NA    | NA | NA | NA | NA | NA | NA  |     |
| NA    | NA | NA | NA | NA | NA | NA  |     |
| NA    | NA | NA | NA | NA | NA | NA  |     |
| NA    | NA | NA | NA | NA | NA | NA  |     |
| NA    | NA | NA | NA | NA | NA | NA  |     |
| NA    | NA | NA | NA | NA | NA | NA  |     |
| NA    | NA | NA | NA | NA | NA | NA  |     |
| NA    | NA | NA | NA | NA | NA | NA  |     |
| NA    | NA | NA | NA | NA | NA | NA  |     |
| NA    | NA | NA | NA | NA | NA | NA  |     |
| NA    | NA | NA | NA | NA | NA | NA  |     |
| NA    | NA | NA | NA | NA | NA | NA  |     |
| NA    | NA | NA | NA | NA | NA | NA  |     |
| NA    | NA | NA | NA | NA | NA | NA  |     |
| NA    | NA | NA | NA | NA | NA | NA  |     |
| NA    | NA | NA | NA | NA | NA | NA  |     |
| NA    | NA | NA | NA | NA | NA | NA  |     |
| NA    | NA | NA | NA | NA | NA | NA  |     |
| NA    | NA | NA | NA | NA | NA | NA  |     |
| NA    | NA | NA | NA | NA | NA | NA  |     |
| NA    | NA | NA | NA | NA | NA | NA  |     |
| NA    | NA | NA | NA | NA | NA | NA  |     |
| NA    | NA | NA | NA | NA | NA | NA  |     |
| NA    | NA | NA | NA | NA | NA | NA  |     |
| NA    | NA | NA | NA | NA | NA | NA  |     |
| NA    | NA | NA | NA | NA | NA | NA  |     |
| NA    | NA | NA | NA | NA | NA | NA  |     |
| NA    | NA | NA | NA | NA | NA | NA  |     |
| NA    | NA | Y  | y  |    | 15 | 180 | 180 |
| 60 MG |    | 60 | NA | NA | NA | NA  |     |
| NA    | NA | NA | NA | NA | NA | NA  |     |
| NA    | NA | NA | NA | NA | NA | NA  |     |
| NA    | NA | NA | NA | NA | NA | NA  |     |
| NA    | NA | NA | y  |    | 20 | 100 | 100 |
| NA    | NA | NA | NA | NA | NA | NA  |     |
| NA    | NA | NA | NA | NA | NA | NA  |     |



























|       |    |    |    |    |    |    |
|-------|----|----|----|----|----|----|
| NA    | NA | NA | NA | NA | NA | NA |
| NA    | NA | NA | NA | NA | NA | NA |
| 5 MG  |    | 5  | NA | NA | NA | NA |
| NA    | NA |    | NA | NA | NA | NA |
| NA    | NA |    | NA | NA | NA | NA |
| NA    | NA |    | NA | NA | NA | NA |
| NA    | NA |    | NA | NA | NA | NA |
| NA    | NA |    | NA | NA | NA | NA |
| 5 MG  |    | 5  | NA | NA | NA | NA |
| NA    | NA |    | NA | NA | NA | NA |
| NA    | NA |    | NA | NA | NA | NA |
| NA    | NA |    | NA | NA | NA | NA |
| NA    | NA |    | NA | NA | NA | NA |
| NA    | NA |    | NA | NA | NA | NA |
| NA    | NA |    | NA | NA | NA | NA |
| NA    | NA |    | NA | NA | NA | NA |
| NA    | NA |    | NA | NA | NA | NA |
| NA    | NA |    | NA | NA | NA | NA |
| NA    | NA |    | NA | NA | NA | NA |
| NA    | NA |    | NA | NA | NA | NA |
| NA    | NA |    | NA | NA | NA | NA |
| NA    | NA |    | NA | NA | NA | NA |
| NA    | NA |    | NA | NA | NA | NA |
| NA    | NA |    | NA | NA | NA | NA |
| NA    | NA |    | NA | NA | NA | NA |
| NA    | NA |    | NA | NA | NA | NA |
| NA    | NA |    | NA | NA | NA | NA |
| NA    | NA |    | NA | NA | NA | NA |
| NA    | NA |    | NA | NA | NA | NA |
| NA    | NA |    | NA | NA | NA | NA |
| NA    | NA |    | NA | NA | NA | NA |
| NA    | NA |    | NA | NA | NA | NA |
| NA    | NA |    | NA | NA | NA | NA |
| NA    | NA |    | NA | NA | NA | NA |
| NA    | NA |    | NA | NA | NA | NA |
| NA    | NA |    | NA | NA | NA | NA |
| NA    | NA |    | NA | NA | NA | NA |
| NA    | NA |    | NA | NA | NA | NA |
| NA    | NA |    | NA | NA | NA | NA |
| NA    | NA |    | NA | NA | NA | NA |
| NA    | NA |    | NA | NA | NA | NA |
| 10 MG |    | 10 | NA | NA | NA | NA |
| NA    | NA |    | NA | NA | NA | NA |









|       |    |    |    |    |    |    |    |
|-------|----|----|----|----|----|----|----|
| NA    | NA | NA | NA | NA | NA | NA |    |
| NA    | NA | NA | NA | NA | NA | NA |    |
| NA    | NA | NA | NA | NA | NA | NA |    |
| NA    | NA | NA | NA | NA | NA | NA |    |
| NA    | NA | NA | NA | NA | NA | NA |    |
| NA    | NA | NA | NA | NA | NA | NA |    |
| NA    | NA | NA | NA | NA | NA | NA |    |
| NA    | NA | NA | NA | NA | NA | NA |    |
| NA    | NA | NA | NA | NA | NA | NA |    |
| NA    | NA | NA | NA | NA | NA | NA |    |
| 40 MG |    | 40 | NA | NA | NA | NA |    |
| NA    | NA | NA | NA | NA | NA | NA |    |
| NA    | NA | NA | NA | NA | NA | NA |    |
| NA    | NA | NA | NA | NA | NA | NA |    |
| NA    | NA | NA | NA | NA | NA | NA |    |
| NA    | NA | NA | NA | NA | NA | NA |    |
| NA    | NA | NA | NA | NA | NA | NA |    |
| NA    | NA | NA | NA | NA | NA | NA |    |
| 5 MG  |    | 5  | NA | NA | NA | NA |    |
| NA    | NA | NA | NA | NA | NA | NA |    |
| NA    | NA | NA | NA | NA | NA | NA |    |
| NA    | NA | NA | NA | NA | NA | NA |    |
| NA    | NA | NA | NA | NA | NA | NA |    |
| NA    | NA | NA | NA | NA | NA | NA |    |
| NA    | NA | NA | NA | NA | NA | NA |    |
| NA    | NA | NA | NA | NA | NA | NA |    |
| NA    | NA | NA | NA | NA | NA | NA |    |
| NA    | NA | NA | NA | NA | NA | NA |    |
| NA    | NA | NA | NA | NA | NA | NA |    |
| NA    | NA | NA | NA | NA | NA | NA |    |
| NA    | NA | NA | NA | NA | NA | NA |    |
| NA    | NA | NA | NA | NA | NA | NA |    |
| NA    | NA | NA | NA | NA | NA | NA |    |
| NA    | NA | NA | NA | NA | NA | NA |    |
| NA    | NA | Y  | NA | NA | NA | NA |    |
| 80 MG |    | 80 | Y  | NA | NA | NA |    |
| NA    | NA | NA | NA | NA | NA | NA |    |
| NA    | NA | NA | y  |    | 10 | 10 | 10 |
| NA    | NA | NA | NA | NA | NA | NA |    |
| NA    | NA | NA | NA | NA | NA | NA |    |
| NA    | NA | NA | NA | NA | NA | NA |    |
| NA    | NA | NA | NA | NA | NA | NA |    |
| NA    | NA | NA | NA | NA | NA | NA |    |
| 40 MG |    | 40 | NA | NA | NA | NA |    |
| NA    | NA | NA | NA | NA | NA | NA |    |





|      |    |     |    |    |    |    |    |
|------|----|-----|----|----|----|----|----|
| NA   | NA | NA  | NA | NA | NA | NA |    |
| NA   | NA | NA  | NA | NA | NA | NA |    |
| NA   | NA | NA  | NA | NA | NA | NA |    |
| 5 MG |    | 5 Y | y  |    | 15 | 15 | 15 |
| NA   | NA | NA  | NA | NA | NA | NA |    |
| NA   | NA | NA  | NA | NA | NA | NA |    |
| NA   | NA | NA  | NA | NA | NA | NA |    |





























































NA  
NA  
NA  
NA  
NA  
NA  
NA
