# Supplementary material for: Predictors for inpatient mortality during the first wave of the SARS-CoV-2 pandemic: A retrospective analysis
Source: PubMed Central journal article supplement (PMC8109786; doi:10.1371/journal.pone.0251262), 2021-05-10
Supplement: pone.0251262.s004.pdf [file pone.0251262.s004.pdf]

|    | Event.Name                | Patient.Sex. | Race.   | Ethnicity.   | Detailed.ethn | Please.specif |
|----|---------------------------|--------------|---------|--------------|---------------|---------------|
| 1  | Admission 1               | Female       | Asian   | Not Hispanic |               |               |
| 2  | Admission 1               | Male         | White   | Not Hispanic |               |               |
| 3  | Admission 1               | Male         |         | Hispanic     | Mexican       |               |
| 4  | Admission 1               | Male         | Unknown | Unknown      |               |               |
| 5  | Admission 1               | Male         | Black   | Not Hispanic |               |               |
| 6  | Admission 1               | Male         |         | Hispanic     | Other         | Argentinean   |
| 7  | Admission 1               | Male         | Unknown | Hispanic     | Mexican       |               |
| 8  | Admission 1               | Female       | Unknown | Not Hispanic |               |               |
| 9  | Admission 1               | Male         | White   | Not Hispanic |               |               |
| 10 | Admission 1               | Female       | White   | Not Hispanic |               |               |
| 11 | Admission 1               | Male         | White   | Not Hispanic |               |               |
| 12 | Admission 1               | Male         | White   | Not Hispanic |               |               |
| 13 | Admission 1               | Male         | White   | Hispanic     | Other         | Ecuadorian    |
| 14 | Admission 1               | Male         | White   | Not Hispanic |               |               |
| 15 | Admission 2 (Readmission) |              |         |              |               |               |
| 16 | Admission 1               | Female       | White   | Unknown      |               |               |
| 17 | Admission 1               | Male         | White   | Not Hispanic |               |               |
| 18 | Admission 1               | Male         | White   | Hispanic     | Other         | Ecuadorian    |
| 19 | Admission 1               | Male         | White   | Not Hispanic |               |               |
| 20 | Admission 2 (Readmission) |              |         |              |               |               |
| 21 | Admission 1               | Male         | White   | Not Hispanic |               |               |
| 22 | Admission 1               | Male         | Black   | Not Hispanic |               |               |
| 23 | Admission 1               | Female       | White   | Not Hispanic |               |               |
| 24 | Admission 2 (Readmission) |              |         |              |               |               |
| 25 | Admission 1               | Female       | White   | Not Hispanic |               |               |
| 26 | Admission 1               | Male         | White   | Not Hispanic |               |               |
| 27 | Admission 1               | Male         | Unknown | Hispanic     | Mexican       |               |
| 28 | Admission 1               | Female       | White   | Not Hispanic |               |               |
| 29 | Admission 1               | Male         | Other   | Hispanic     | Other         | Peruvian      |
| 30 | Admission 1               | Female       | White   | Not Hispanic |               |               |
| 31 | Admission 1               | Male         | White   | Not Hispanic |               |               |
| 32 | Admission 1               | Female       | Unknown | Hispanic     | Other         | Salvadoran    |
| 33 | Admission 1               | Female       | White   | Hispanic     | Mexican       |               |
| 34 | Admission 1               | Male         | White   | Not Hispanic |               |               |
| 35 | Admission 1               | Male         | White   | Not Hispanic |               |               |
| 36 | Admission 1               | Female       | White   | Not Hispanic |               |               |
| 37 | Admission 1               | Female       | Unknown | Hispanic     | Mexican       |               |
| 38 | Admission 1               | Female       | Black   | Not Hispanic |               |               |
| 39 | Admission 1               | Male         | White   | Not Hispanic |               |               |
| 40 | Admission 1               | Male         | White   | Not Hispanic |               |               |
| 41 | Admission 1               | Male         | White   | Hispanic     | Mexican       |               |
| 42 | Admission 1               | Male         | Unknown | Unknown      |               |               |

|    |                           |         |              |              |         |            |
|----|---------------------------|---------|--------------|--------------|---------|------------|
| 43 | Admission 1               | Female  | Black        | Not Hispanic |         |            |
| 44 | Admission 2 (Readmission) |         |              |              |         |            |
| 45 | Admission 1               | (Index) | White        | Hispanic     | Other   | Ecuadorian |
| 46 | Admission 1               | Female  | Other        | Unknown      |         |            |
| 47 | Admission 1               | Male    | White        | Not Hispanic |         |            |
| 48 | Admission 1               | Male    | White        | Not Hispanic |         |            |
| 49 | Admission 1               | Male    | White        | Not Hispanic |         |            |
| 50 | Admission 1               | Male    | Asian        | Not Hispanic |         |            |
| 51 | Admission 1               | Male    | Other        | Hispanic     | Other   | Peruvian   |
| 52 | Admission 1               | Female  | White        | Not Hispanic |         |            |
| 53 | Admission 1               | (Index) | White        | Not Hispanic |         |            |
| 54 | Admission 1               | Female  | White        | Not Hispanic |         |            |
| 55 | Admission 1               | Female  | Asian        | Not Hispanic |         |            |
| 56 | Admission 1               | Female  | Black        | Not Hispanic |         |            |
| 57 | Admission 1               | Male    | Unknown      | Not Hispanic |         |            |
| 58 | Admission 1               | Male    | White        | Not Hispanic |         |            |
| 59 | Admission 1               | Male    | White        | Not Hispanic |         |            |
| 60 | Admission 1               | (Index) | White        | Not Hispanic |         |            |
| 61 | Admission 1               | (Index) | Black        | Not Hispanic |         |            |
| 62 | Admission 1               | Male    | American Inc | Not Hispanic |         |            |
| 63 | Admission 1               | Male    | White        | Not Hispanic |         |            |
| 64 | Admission 2 (Readmission) |         |              |              |         |            |
| 65 | Admission 1               | Male    | Asian        | Not Hispanic |         |            |
| 66 | Admission 1               | Male    | White        | Unknown      |         |            |
| 67 | Admission 1               | Male    | Unknown      | Hispanic     | Other   | Peruvian   |
| 68 | Admission 1               | Male    | White        | Hispanic     | Other   | Ecuadorian |
| 69 | Admission 1               | Female  | Black        | Not Hispanic |         |            |
| 70 | Admission 1               | Female  | White        | Not Hispanic |         |            |
| 71 | Admission 1               | Male    | White        | Not Hispanic |         |            |
| 72 | Admission 1               | Male    | White        | Hispanic     | Other   | Ecuadorian |
| 73 | Admission 1               | Male    | White        | Not Hispanic |         |            |
| 74 | Admission 1               | Male    | Unknown      | Hispanic     | Other   | Ecuadorian |
| 75 | Admission 1               | Male    | White        | Hispanic     | Other   | Peruvian   |
| 76 | Admission 1               | Male    | White        | Not Hispanic |         |            |
| 77 | Admission 1               | Male    | Unknown      | Hispanic     | Mexican |            |
| 78 | Admission 2 (Readmission) |         |              |              |         |            |
| 79 | Admission 1               | Female  | White        | Not Hispanic |         |            |
| 80 | Admission 1               | Male    | Unknown      | Hispanic     | Other   | Ecuadorian |
| 81 | Admission 1               | Male    | White        | Hispanic     | Other   | Peruvian   |
| 82 | Admission 1               | Female  | Black        | Not Hispanic |         |            |
| 83 | Admission 1               | Male    | Other        | Not Hispanic |         |            |
| 84 | Admission 1               | Male    | White        | Unknown      |         |            |
| 85 | Admission 1               | Male    | White        | Not Hispanic |         |            |

|     |                           |        |         |              |              |            |
|-----|---------------------------|--------|---------|--------------|--------------|------------|
| 86  | Admission 1               | Male   | White   | Hispanic     | Mexican      |            |
| 87  | Admission 1               | Male   | Unknown | Hispanic     | Other        | Bolivian   |
| 88  | Admission 1               | Male   | White   | Not Hispanic |              |            |
| 89  | Admission 1               | Male   | White   | Not Hispanic |              |            |
| 90  | Admission 1               | Male   | White   | Hispanic     | Other        | Dominican  |
| 91  | Admission 1               | Female | White   | Hispanic     | Mexican      |            |
| 92  | Admission 1               | Male   | White   | Not Hispanic |              |            |
| 93  | Admission 1               | Male   | Unknown | Hispanic     | Other        | Peruvian   |
| 94  | Admission 1               | Female | White   | Not Hispanic |              |            |
| 95  | Admission 1               | Male   | Black   | Not Hispanic |              |            |
| 96  | Admission 1               | Female | White   | Not Hispanic |              |            |
| 97  | Admission 1               | Female | Black   | Not Hispanic |              |            |
| 98  | Admission 1               | Male   | Unknown | Unknown      |              |            |
| 99  | Admission 1               | Male   | White   | Not Hispanic |              |            |
| 100 | Admission 1               | Female | White   | Not Hispanic |              |            |
| 101 | Admission 2 (Readmission) |        |         |              |              |            |
| 102 | Admission 1               | Male   | Other   | Hispanic     | Other        |            |
| 103 | Admission 1               | Male   | Unknown | Hispanic     | Other        | Peruvian   |
| 104 | Admission 1               | Male   | White   | Not Hispanic |              |            |
| 105 | Admission 1               | Male   | Unknown | Unknown      |              |            |
| 106 | Admission 1               | Male   | Unknown | Hispanic     | Other        | Peruvian   |
| 107 | Admission 1               | Female | Black   | Not Hispanic |              |            |
| 108 | Admission 1               | Male   | White   | Not Hispanic |              |            |
| 109 | Admission 1               | Female | White   | Not Hispanic |              |            |
| 110 | Admission 1               | Male   | Unknown | Hispanic     | Other        | Ecuadorian |
| 111 | Admission 1               | Female | White   | Not Hispanic |              |            |
| 112 | Admission 1               | Male   | Unknown | Hispanic     | Other        | Guatemalan |
| 113 | Admission 1               | Male   | White   | Hispanic     | Other        | Peruvian   |
| 114 | Admission 1               | Female | Black   | Hispanic     | Other        | Dominican  |
| 115 | Admission 1               | Female | Unknown | Hispanic     | Mexican      |            |
| 116 | Admission 1               | Female | Other   | Not Hispanic |              |            |
| 117 | Admission 1               | Female | White   | Not Hispanic |              |            |
| 118 | Admission 1               | Male   | White   | Not Hispanic |              |            |
| 119 | Admission 1               | Male   | White   | Not Hispanic |              |            |
| 120 | Admission 1               | Male   | Black   | Not Hispanic |              |            |
| 121 | Admission 1               | Female | Unknown | Hispanic     | Puerto Rican |            |
| 122 | Admission 1               | Male   | White   | Hispanic     | Other        | Peruvian   |

| Age | at Admi       | Patient         | Insur | Inpatient | Arr | COVID.Symp | COVID.Symp | COVID.Symp | COVID.Symp |
|-----|---------------|-----------------|-------|-----------|-----|------------|------------|------------|------------|
| 59  | Better/       | Heal            | Home  | No        | Yes | Yes        | Yes        | No         |            |
| 51  | Oxford        | Home            | Yes   | Yes       | Yes | Yes        | No         |            |            |
| 60  | Emergency     | Home            | Yes   | Yes       | Yes | Yes        | No         |            |            |
| 72  | Medicaare     | Home            | Yes   | No        | Yes | Yes        | No         |            |            |
| 62  | Medicare      | Home            | No    | Yes       | No  | No         | No         |            |            |
| 77  | Medicare      | Home            | No    | Yes       | Yes | Yes        | No         |            |            |
| 47  | Mohawk Vall   | Home            | No    | No        | Yes | Yes        | No         |            |            |
| 52  | Oxford Healt  | Hospital        | Trar  | No        | No  | Yes        | No         |            |            |
| 82  | Medicare      | Home            | No    | No        | No  | No         | No         |            |            |
| 80  | Medicaid      | Home            | No    | Yes       | Yes | Yes        | No         |            |            |
| 85  | Blue Cross M  | Home            | Yes   | No        | Yes | Yes        | No         |            |            |
| 85  | United Healt  | Urgent Care     | No    | Yes       | No  | No         | No         |            |            |
| 54  | Blue Cross P  | Home            | Yes   | Yes       | Yes | Yes        | No         |            |            |
| 61  | PMA           | Home            | Yes   | Yes       | Yes | Yes        | No         |            |            |
| 61  | PMA           | Home            | Yes   | Yes       | Yes | Yes        | No         |            |            |
| 60  | Emblem Hea    | Home            | No    | No        | Yes | Yes        | No         |            |            |
| 68  | Medicare      | Home            | No    | No        | No  | No         | No         |            |            |
| 49  | Aetna Pos     | Home            | Yes   | No        | Yes | Yes        | No         |            |            |
| 73  | medicare      | Home            | No    | Yes       | Yes | Yes        | No         |            |            |
| 73  | Medicare      | Rehabilitatio   | Yes   | No        | Yes | Yes        | No         |            |            |
| 61  | medicare      | Rehabilitatio   | No    | No        | Yes | Yes        | No         |            |            |
| 67  | Emblem HIP    | Home            | No    | Yes       | Yes | Yes        | No         |            |            |
| 63  | Medicare      | Hospital        | Trar  | No        | No  | No         | No         |            |            |
| 63  | Medicare/M    | SNF/NH          | No    | No        | No  | No         | No         |            |            |
| 79  | Medicare      | Rehabilitatio   | No    | No        | Yes | Yes        | No         |            |            |
| 78  | Medicare      | Home            | No    | No        | No  | No         | No         |            |            |
| 58  | Blue Cross oi | Home            | Yes   | No        | Yes | Yes        | No         |            |            |
| 69  | medicare      | Doctor Office   | Yes   | Yes       | No  | No         | No         |            |            |
| 96  | Medicare      | Home            | Yes   | No        | Yes | Yes        | No         |            |            |
| 87  | Medicare      | Assisted Living | No    | Yes       | No  | No         | No         |            |            |
| 85  | Medicare      | SNF/NH          | Yes   | No        | Yes | Yes        | No         |            |            |
| 41  | Affinity Heal | Home            | Yes   | Yes       | Yes | Yes        | No         |            |            |
| 50  | Emergency     | Home            | Yes   | Yes       | Yes | Yes        | No         |            |            |
| 68  | MCR           | Home            | Yes   | Yes       | Yes | Yes        | No         |            |            |
| 54  | Affinity Heal | Home            | Yes   | Yes       | Yes | Yes        | Yes        |            |            |
| 88  | MCR           |                 | No    | No        | No  | No         | No         |            |            |
| 66  | Local 1199    | Home            | Yes   | Yes       | Yes | Yes        | No         |            |            |
| 92  | HIP MCR       | Home            | Yes   | Yes       | Yes | Yes        | No         |            |            |
| 60  | Better Healt  | Home            | Yes   | Yes       | No  | No         | No         |            |            |
| 74  | Aetna Mcr     | Home            | Yes   | Yes       | Yes | Yes        | No         |            |            |
| 60  | MCR           | Home            | No    | Yes       | Yes | Yes        | No         |            |            |
| 49  | Blue Cross In | Home            | No    | Yes       | Yes | Yes        | No         |            |            |

|    |               |                |                 |     |     |     |     |
|----|---------------|----------------|-----------------|-----|-----|-----|-----|
| NA | 45            | Local 1199 MCR | Home            | Yes | Yes | Yes | No  |
|    |               |                | Home            | No  | No  | Yes | No  |
|    | 49            | Medicaid       | Home            | No  | No  | Yes | No  |
|    | 43            | Better Health  | Hospital Trar   | No  | Yes | Yes | Yes |
|    | 82            | Medicare       | SNF/NH          | Yes | No  | Yes | No  |
|    | 95            | Medicare       | SNF/NH          | No  | No  | No  | No  |
|    | 92            | Medicare       | Assisted Living | No  | No  | No  | No  |
|    | 69            | Local 1199 N   | Home            | No  | Yes | Yes | No  |
|    | 67            | Medicare       | Home            | Yes | No  | Yes | No  |
|    | 59            | Tricare        | Home            | No  | No  | Yes | No  |
|    | 82            | Medicare       | Home            | Yes | Yes | Yes | No  |
|    | 71            | Medicare       | Home            | Yes | Yes | Yes | No  |
|    | 84            | Medicare       | Assisted Living | No  | Yes | Yes | No  |
|    | 62            | Aetna POS      | Home            | Yes | Yes | Yes | No  |
|    | 55            | Blue Cross of  | Home            | No  | Yes | Yes | No  |
|    | 75            | Medicare       | Home            | No  | No  | Yes | No  |
|    | 69            | Medicare       | Home            | Yes | Yes | No  | No  |
|    | 61            | Blue Cross     | Out of State    | Yes | No  | Yes | No  |
|    | 70            | Medicare       | Urgent Care     | Yes | No  | Yes | No  |
|    | 81            | Medicare       | Assisted Living | No  | No  | Yes | No  |
| NA | 73            | Aetna Pos      | Home            | No  | Yes | Yes | No  |
|    |               | United Health  | Home            | No  | No  | Yes | No  |
|    | 65            | Healthfirst N  | Home            | Yes | Yes | Yes | No  |
|    | 89            | United Health  | Home            | No  | No  | No  | No  |
|    | 61            | Blue Cross O   | Home            | Yes | No  | Yes | No  |
|    | 62            | Emergency M    | Home            | No  | No  | Yes | No  |
|    | 56            | Emblem Hip     | Home            | Yes | No  | Yes | No  |
|    | 59            | Medicaid       | Home            | Yes | Yes | Yes | No  |
|    | 78            | Medicare       | Home            | No  | No  | No  | No  |
|    | 71            | United Health  | Urgent Care     | No  | Yes | No  | No  |
| NA | 60            | Aetna Pos      | Home            | No  | No  | Yes | No  |
|    | 45            | Oxford Health  | Home            | No  | Yes | No  | Yes |
|    | 54            | MVP essenti    | Home            | Yes | No  | Yes | No  |
|    | 90            | Medicare       | Home            | Yes | Yes | No  | No  |
|    | 59            | Emergency n    | Home            | No  | No  | Yes | No  |
|    |               | Bue cross pp   | Home            | No  | No  | Yes | No  |
|    | 76            | Medicare       | Home            | Yes | Yes | Yes | No  |
|    | 64            | Emergency M    | Doctor Office   | Yes | No  | Yes | No  |
|    | 54            | Medicaid       | Home            | Yes | Yes | Yes | No  |
|    | 70            | United Health  | Home            | No  | Yes | No  | No  |
| 60 | Oxford Health | Urgent Care    | Yes             | Yes | Yes | No  |     |
| 56 | Shareplans    | Hospital Trar  | No              | No  | Yes | Yes |     |
| 74 | Cigna Health  | Home           | No              | No  | Yes | No  |     |

|    |    |               |                 |     |     |     |     |
|----|----|---------------|-----------------|-----|-----|-----|-----|
|    | 61 | Emergency M   | Home            | Yes | Yes | Yes | No  |
|    | 61 | Emergency M   | Home            | No  | No  | Yes | No  |
|    | 72 | Medicare      | Assisted Living | No  | No  | Yes | No  |
|    | 88 | Medicare      | Home            | Yes | No  | No  | No  |
|    | 67 | Local 1199    | Home            | Yes | Yes | Yes | Yes |
|    | 59 | Emergency M   | Home            | Yes | No  | Yes | No  |
|    | 71 | Medicare      | Home            | Yes | Yes | No  | Yes |
|    | 58 | Emergency M   | Home            | No  | No  | Yes | No  |
|    | 74 | Medicare      | Rehabilitative  | No  | No  | Yes | No  |
|    | 81 | Medicare      | SNF/NH          | No  | No  | Yes | No  |
|    | 55 | Cigna Health  | Home            | No  | No  | Yes | No  |
|    | 58 | AFFINITY HL   | Hospital Trar   | No  | Yes | Yes | No  |
|    | 64 | Blue Cross PI | Hospital Trar   | No  | No  | Yes | No  |
|    | 61 | UNITED HEALTH | Home            | Yes | Yes | Yes | No  |
| NA |    | Blue Cross M  | Home            | No  | Yes | Yes | No  |
|    | 76 | BLC Medicare  | Home            | No  | No  | No  | No  |
|    | 52 | BLUE CROSS    | Home            | Yes | Yes | Yes | No  |
|    | 74 | Medicare      | Home            | Yes | Yes | Yes | Yes |
|    | 88 | Medicare      | Home            | Yes | No  | Yes | No  |
|    | 46 | EMERGENCY     | Hospital Trar   | Yes | Yes | No  | No  |
|    | 49 | CIGNA HEALTH  | Home            | Yes | Yes | Yes | No  |
|    | 63 | Blue Cross PI | Home            | Yes | Yes | Yes | No  |
|    | 78 | Medicare      | Home            | Yes | No  | Yes | No  |
|    | 91 | Medicare      | Home            | Yes | No  | Yes | No  |
|    | 64 | Blue Cross PI | Home            | Yes | Yes | Yes | No  |
|    | 71 | HIP MCR       | Home            | Yes | Yes | Yes | No  |
|    | 42 | Medicaid      | Home            | Yes | Yes | Yes | Yes |
|    | 48 | AETNA POS     | Home            | Yes | Yes | Yes | No  |
|    | 68 | Fidelis Medic | Home            | No  | Yes | Yes | No  |
|    | 64 | MVP Essential | Urgent Care     | Yes | Yes | Yes | No  |
|    | 78 | Hip Medicare  | Home            | No  | No  | No  | No  |
|    | 89 | Aetna Medic   | Home            | Yes | Yes | Yes | Yes |
|    | 85 | United Health | Home            | Yes | No  | No  | No  |
|    | 67 | Medicare      | Home            | No  | No  | Yes | No  |
|    | 62 | Local 1199    | Home            | Yes | No  | Yes | No  |
|    | 69 | Healthfirst M | Home            | No  | No  | No  | No  |
|    | 54 | Medicaid      | Home            | Yes | Yes | Yes | No  |

| COVID.Symp1 | COVID.Symp2 | COVID.Symp3 | COVID.Symp4 | COVID.Symp5 | COVID.Symp6 | Admission.Pr   |
|-------------|-------------|-------------|-------------|-------------|-------------|----------------|
| No          | No          | No          | No          | No          | No          | Pisipati, Rarr |
| No          | No          | No          | No          | Yes         | No          |                |
| No          | No          | No          | No          | Yes         | No          |                |
| No          | No          | No          | No          | No          | No          |                |
| No          | No          | No          | No          | No          | No          |                |
| No          | No          | No          | No          | No          | No          |                |
| No          | No          | No          | No          | No          | No          |                |
| No          | No          | No          | No          | No          | No          | na             |
| No          | No          | No          | No          | No          | No          |                |
| No          | No          | No          | No          | No          | No          |                |
| No          | No          | No          | No          | No          | No          |                |
| No          | No          | No          | No          | No          | No          |                |
| No          | No          | No          | No          | Yes         | No          |                |
| No          | No          | No          | No          | No          | No          |                |
| No          | No          | No          | No          | No          | No          |                |
| No          | No          | No          | No          | No          | No          |                |
| No          | No          | No          | No          | No          | No          |                |
| No          | Yes         | No          | No          | No          | No          | Acute respira  |
| No          | No          | No          | No          | No          | No          |                |
| No          | No          | No          | No          | No          | No          | Pneumonia      |
| No          | No          | No          | No          | No          | No          |                |
| No          | No          | No          | No          | No          | No          |                |
| No          | No          | No          | No          | No          | No          | Glenn davis    |
| No          | No          | No          | No          | No          | No          | ESRD           |
| No          | No          | No          | No          | No          | No          |                |
| No          | No          | No          | No          | Yes         | No          |                |
| No          | No          | No          | No          | Yes         | No          |                |
| No          | Yes         | No          | No          | Yes         | No          |                |
| No          | No          | No          | No          | No          | No          |                |
| No          | No          | No          | No          | No          | No          |                |
| No          | No          | No          | No          | Yes         | No          |                |
| No          | No          | No          | No          | No          | No          |                |
| No          | No          | No          | No          | Yes         | No          |                |
| No          | No          | Yes         | Yes         | Yes         | No          |                |
| No          | No          | No          | No          | Yes         | No          |                |
| No          | Yes         | No          | No          | No          | No          |                |
| No          | No          | No          | No          | No          | No          |                |
| No          | No          | No          | No          | No          | No          |                |
| No          | No          | No          | No          | No          | No          |                |
| No          | No          | No          | No          | Yes         | No          |                |
| No          | No          | No          | No          | No          | No          |                |

|     |     |    |    |     |    |               |
|-----|-----|----|----|-----|----|---------------|
| No  | No  | No | No | Yes | No | Brinson, Ver  |
| No  | No  | No | No | Yes | No |               |
| No  | No  | No | No | Yes | No | COVID 19      |
| Yes | No  | No | No | Yes | No | Respiratory F |
| No  | No  | No | No | No  | No | Hypoxia       |
| No  | No  | No | No | Yes | No | covid pna     |
| No  | No  | No | No | No  | No |               |
| No  | No  | No | No | No  | No |               |
| No  | No  | No | No | Yes | No | Covid 19      |
| No  | No  | No | No | No  | No |               |
| No  | No  | No | No | No  | No |               |
| No  | No  | No | No | No  | No |               |
| No  | No  | No | No | No  | No |               |
| No  | No  | No | No | No  | No |               |
| No  | No  | No | No | No  | No |               |
| No  | No  | No | No | No  | No |               |
| No  | No  | No | No | No  | No |               |
| No  | No  | No | No | No  | No |               |
| No  | No  | No | No | No  | No |               |
| No  | No  | No | No | Yes | No |               |
| No  | No  | No | No | No  | No |               |
| No  | No  | No | No | No  | No |               |
| No  | No  | No | No | No  | No |               |
| No  | No  | No | No | No  | No |               |
| No  | No  | No | No | No  | No |               |
| No  | No  | No | No | No  | No |               |
| No  | No  | No | No | No  | No |               |
| No  | No  | No | No | No  | No |               |
| No  | No  | No | No | No  | No |               |
| No  | No  | No | No | No  | No |               |
| No  | No  | No | No | No  | No |               |
| No  | No  | No | No | No  | No |               |
| No  | No  | No | No | No  | No |               |
| No  | No  | No | No | No  | No |               |
| No  | No  | No | No | No  | No |               |
| No  | No  | No | No | No  | No |               |
| No  | No  | No | No | No  | No |               |
| No  | No  | No | No | No  | No |               |
| No  | No  | No | No | No  | No |               |
| Yes | No  | No | No | No  | No | COVID-19      |
| No  | No  | No | No | No  | No |               |
| No  | No  | No | No | No  | No |               |
| No  | No  | No | No | No  | No |               |
| No  | No  | No | No | No  | No |               |
| No  | No  | No | No | No  | No |               |
| No  | No  | No | No | No  | No |               |
| No  | No  | No | No | No  | No |               |
| No  | No  | No | No | No  | No |               |
| No  | No  | No | No | No  | No |               |
| Yes | No  | No | No | No  | No |               |
| Yes | Yes | No | No | Yes | No |               |
| No  | No  | No | No | No  | No |               |
| No  | No  | No | No | No  | No |               |
| No  | No  | No | No | No  | No |               |
| No  | No  | No | No | Yes | No | Acute hypoxi  |
| No  | No  | No | No | No  | No | Acute hypoxi  |



|     |     |    |     |     |    |               |
|-----|-----|----|-----|-----|----|---------------|
| No  | No  | No | No  | No  | No | Acute hypoxe  |
| No  | No  | No | No  | No  | No | Acute hypoxe  |
| No  | No  | No | No  | No  | No | Covid + PNA   |
| No  | No  | No | No  | No  | No | Fall, Covid + |
| No  | No  | No | No  | No  | No | Respiratory F |
| Yes | No  | No | No  | No  | No |               |
| No  | No  | No | No  | No  | No |               |
| No  | No  | No | No  | No  | No |               |
| No  | No  | No | No  | No  | No |               |
| No  | No  | No | No  | No  | No |               |
| No  | No  | No | No  | No  | No |               |
| No  | No  | No | No  | No  | No | A41.89 Other  |
| No  | No  | No | No  | No  | No | A41.89 Other  |
| No  | No  | No | No  | Yes | No | U07.1 COVID   |
| No  | No  | No | No  | Yes | No | U07.1 COVID   |
| No  | No  | No | No  | No  | No | Hyponatremi   |
| No  | No  | No | No  | No  | No | A41.89 Other  |
| Yes | No  | No | No  | Yes | No | U07.1 COVID   |
| No  | No  | No | No  | No  | No | U07.1 COVID   |
| No  | No  | No | No  | No  | No | A41.89 Other  |
| No  | No  | No | No  | No  | No | A41.89 Other  |
| No  | No  | No | No  | No  | No | U07.1 COVID   |
| No  | No  | No | No  | No  | No | D59.1 Other   |
| No  | Yes | No | No  | Yes | No | A41.89 Other  |
| No  | No  | No | No  | No  | No | U07.1 COVID   |
| Yes | No  | No | No  | No  | No | U07.1 COVID   |
| No  | No  | No | No  | Yes | No | A41.89 Other  |
| Yes | No  | No | No  | No  | No | A41.89 Other  |
| No  | No  | No | No  | Yes | No |               |
| Yes | No  | No | No  | No  | No |               |
| No  | No  | No | No  | No  | No |               |
| No  | No  | No | Yes | No  | No |               |
| No  | No  | No | No  | No  | No |               |
| No  | No  | No | No  | No  | No | n/a           |
| No  | No  | No | No  | No  | No | n/a           |
| Yes | No  | No | No  | No  | No | n/a           |
| Yes | Yes | No | No  | Yes | No | N/A           |

| Did.the.patie | Did.the.test. | Type.of.treat  | Bed.Types.D | Bed.Types.D | Bed.Types.D | Discharge.Di   |
|---------------|---------------|----------------|-------------|-------------|-------------|----------------|
| No            |               | This is an inc | No          | Yes         | No          | Death          |
| Yes           | Yes           |                | No          | No          | Yes         | home           |
| Yes           | Yes           |                | Yes         | No          | No          | Home           |
|               |               |                | No          | No          | No          | Home           |
| Yes           | Yes           |                | Yes         | No          | No          | Expired        |
| Yes           | No            |                | Yes         | No          | No          | SNF            |
| Yes           | No            |                | Yes         | No          | No          | Home           |
| Yes           | No            |                | No          | Yes         | No          | Other Acute    |
| Yes           | Yes           |                | Yes         | Yes         | Yes         | Expired        |
| Yes           | Yes           |                | No          | No          | Yes         | Expired        |
| Yes           | Yes           |                | No          | No          | Yes         | Expired        |
| Yes           | Yes           |                | No          | No          | Yes         | SNF            |
| Yes           | Yes           |                | No          | Yes         | No          | Expired        |
| Yes           | No            |                | Yes         | No          | No          | home           |
| Yes           | Yes           |                | No          | Yes         | No          | expired        |
| Yes           | Yes           |                | No          | Yes         | Yes         | Expired        |
| Yes           | Yes           |                | Yes         | Yes         | Yes         | Expired        |
| Yes           | Yes           |                | Yes         | Yes         | No          | acute care ho  |
| Yes           | Yes           |                | Yes         | No          | No          | home           |
| Yes           | Yes           |                | No          | Yes         | No          | EXPIRED        |
| Yes           | Yes           |                | Yes         | No          | No          | Montifiore     |
| Yes           | No            |                | Yes         | Yes         | No          | Expired        |
| Yes           | Yes           |                | Yes         | No          | No          | Northern We    |
| Yes           | Yes           |                | No          | No          | No          | Skilled Nursi  |
| Yes           | No            |                | No          | No          | No          | expired        |
| Yes           | Yes           |                | No          | No          | Yes         | expired        |
| Yes           | Yes           |                | No          | Yes         | Yes         | expired        |
| Yes           | Yes           |                | No          | No          | No          | expired        |
| Yes           | Yes           |                | Yes         | No          | No          | expired        |
| Yes           | Yes           |                | Yes         | No          | Yes         | expired        |
| Yes           | Yes           |                | Yes         | No          | Yes         | Skilled nursir |
| Yes           | Yes           |                | Yes         | Yes         | No          | Expired        |
| Yes           | No            |                | Yes         | No          | No          | expired        |
| Yes           | Yes           |                | Yes         | No          | No          | home           |
| Yes           | Yes           |                | Yes         | No          | No          | expired        |
| Yes           | Yes           |                | Yes         | No          | Yes         | expired        |
| Yes           | Yes           |                | Yes         | No          | No          | home           |
| Yes           | Yes           |                | No          | Yes         | Yes         | Physical Reh:  |
| Yes           | No            |                | Yes         | No          | Yes         | home           |
| Yes           | Yes           |                | Yes         | No          | No          | SNF            |
| Yes           | Yes           |                | Yes         | No          | No          | Home           |

|     |     |                |     |     |     |                |
|-----|-----|----------------|-----|-----|-----|----------------|
| Yes | Yes |                | Yes | No  | Yes | Phys Rehab     |
| Yes | Yes |                | Yes | No  | No  | home           |
| Yes | Yes |                | No  | Yes | No  | Expired        |
| Yes | Yes |                | Yes | Yes | No  | Expired        |
| Yes | Yes |                | No  | No  | Yes | SNF            |
| Yes | Yes |                | No  | No  | No  | Expired        |
| Yes | Yes |                | Yes | No  | No  | Expired        |
| Yes | Yes |                | Yes | No  | No  |                |
| Yes | No  |                | Yes | No  | No  | Home           |
| Yes | Yes |                | No  | No  | Yes | home           |
| Yes | Yes |                | Yes | No  | No  | SNF            |
| Yes | No  |                | Yes | No  | No  | SNF            |
|     |     |                | No  | Yes | Yes | Expired        |
| Yes | No  |                | Yes | No  | No  | Rehab          |
| Yes | Yes |                | Yes | No  | Yes | Rehab          |
| Yes | Yes |                | Yes | No  | No  | Expired        |
| Yes | Yes |                | Yes | Yes | No  | Rehab          |
| Yes | Yes |                | Yes | No  | Yes | Rehab          |
| Yes | No  |                | No  | Yes | Yes | Expired        |
| Yes | Yes |                | Yes | No  | No  | Expired        |
| Yes | Yes |                | Yes | No  | Yes | Rehab          |
| No  |     | This is a reac | No  | No  | Yes | Expired        |
| Yes | No  |                | Yes | No  | Yes | Home Health    |
| Yes | Yes |                | No  | Yes | Yes | Expired        |
| Yes | Yes |                | Yes | Yes | No  | Expired        |
| Yes | No  |                | No  | Yes | Yes | Expired        |
| No  |     | This is an inc | Yes | No  | No  | Home           |
| Yes | Yes |                | Yes | Yes | Yes | Rehab          |
| Yes | Yes |                | No  | No  | Yes | Home           |
| Yes | Yes |                | Yes | Yes | Yes | Expired        |
| Yes | Yes |                | Yes | Yes | Yes | SNF            |
| Yes | Yes |                | No  | No  | Yes | Home Health    |
| Yes | Yes |                | Yes | Yes | No  | expired        |
| Yes | Yes |                | No  | No  | No  | skilled nursir |
| Yes | Yes |                | No  | No  | Yes | Burke rehab    |
| Yes | Yes |                | Yes | Yes | Yes | Acute care h   |
| Yes | Yes |                | Yes | Yes | Yes | acute rehab    |
| Yes | Yes |                | Yes | No  | Yes | Home           |
| Yes | Yes |                | Yes | No  | No  | Home           |
| Yes | No  |                | Yes | Yes | No  |                |
| Yes | Yes |                | No  | Yes | Yes | Expired        |
| No  |     | This is an inc | No  | Yes | No  | Expired        |
| Yes | Yes |                | No  | Yes | Yes | Expired        |

|     |     |                |     |     |                |
|-----|-----|----------------|-----|-----|----------------|
| Yes | Yes | No             | Yes | No  | Expired        |
| No  |     | This is an inc | No  | Yes | Expired        |
| Yes | Yes | Yes            | Yes | Yes | SNF            |
| Yes | Yes | Yes            | No  | No  | Rehab facilit  |
| Yes | Yes | Yes            | Yes | Yes | Expired        |
| Yes | Yes | Yes            | Yes | Yes | Expired        |
| No  |     | This is an inc | Yes | No  | Rehab          |
| Yes | Yes | No             | Yes | Yes | Expired        |
| Yes | Yes | Yes            | No  | Yes | Short-term r   |
| Yes | Yes | Yes            | No  | No  | Nursing facil  |
| Yes | Yes | No             | Yes | Yes | Burke rehab    |
| Yes | Yes | No             | Yes | No  | Expired        |
| Yes | Yes | No             | Yes | No  | Expired        |
| No  |     | This is an inc | Yes | Yes | TO HOME W      |
| Yes | Yes | Yes            | No  | Yes | TO HOME W      |
| Yes | Yes | No             | No  | Yes | Other Acute    |
| Yes | Yes | Yes            | Yes | No  | XFER REHAB     |
| Yes | Yes | Yes            | Yes | Yes | Expired        |
| Yes | Yes | No             | No  | Yes | Expired        |
| No  |     | This is an inc | Yes | Yes | Expired        |
| Yes | Yes | Yes            | No  | No  | ROUTINE/HC     |
| Yes | Yes | Yes            | Yes | Yes | Expired        |
| Yes | Yes | Yes            | Yes | Yes | Expired        |
| Yes | Yes | Yes            | No  | Yes | TO HOME W      |
| Yes | Yes | Yes            | Yes | Yes | Expired        |
| Yes | Yes | Yes            | Yes | Yes | SKILLED NUR    |
| Yes | Yes | No             | Yes | Yes | Expired        |
| No  |     | This is an inc | Yes | Yes | Expired        |
| Yes | Yes | Yes            | Yes | Yes | expired        |
| Yes | Yes | Yes            | No  | No  | Home           |
| Yes | Yes | Yes            | No  | No  | SNF            |
| No  |     | This is an inc | Yes | No  | in patient rel |
| Yes | Yes | Yes            | No  | No  | Expired        |
| Yes | Yes | No             | Yes | No  | Expired        |
| Yes | Yes | Yes            | No  | No  | Other Acute    |
| Yes | Yes | Yes            | No  | No  | Other Acute    |
| Yes | Yes | Yes            | No  | No  | Home           |

| Discharged.o | Discharged.o | Complete. | Patient.Heigl | Patient.Weig | Patient.BMI | Blood.Type |
|--------------|--------------|-----------|---------------|--------------|-------------|------------|
| No           | No           | Complete  | 165.1         | 63.4         | 23.26       | O POS      |
| No           | No           | Complete  | 172.7         | 104.6        | 35.07       | A POS      |
| No           | Yes          | Complete  | 172.7         | 88.1         | 29.54       | O POS      |
| No           | No           | Complete  | 170.69        | 86.4         | 29.65       | O POS      |
| No           | No           | Complete  | 172.7         | 88.6         | 29.71       | O POS      |
| No           | Yes          | Complete  | 170.1         | 96.4         | 33.32       | A POS      |
| No           | No           | Complete  | 182           | 100          | 30.19       | O POS      |
| No           | Yes          | Complete  | 160           | 115.6        | 45.16       | A POS      |
|              |              | Complete  | 177.8         | 90.9         | 28.75       | O POS      |
| No           | No           | Complete  | 160           | 72           | 28.13       | O POS      |
| No           | No           | Complete  | 164           | 90.7         | 33.72       | O POS      |
| No           | Yes          | Complete  | 175.3         | 77.3         | 25.15       | O POS      |
| No           | No           | Complete  | 162.5         | 100.3        | 37.98       | O POS      |
| No           | Yes          | Complete  | 183           | 94.9         | 28.34       | A NEG      |
|              |              | Complete  | 187.96        | 97.1         | 27.48       | A NEG      |
|              |              | Complete  | 165.1         | 55.9         | 20.51       | O POS      |
|              |              | Complete  | 177.8         | 84.5         | 26.73       | A POS      |
| Yes          | Yes          | Complete  | 157.48        | 75           | 30.24       | O POS      |
| No           | No           | Complete  | 170.1         | 72.2         | 24.95       | O POS      |
|              |              | Complete  | 167           | 74           | 26.53       | O POS      |
| No           | Yes          | Complete  | 193           | 92.7         | 24.89       | A POS      |
|              |              | Complete  | 172.7         | 117.8        | 39.5        | O POS      |
| No           | No           | Complete  | 165.1         | 109          | 39.99       | A POS      |
| No           | No           | Complete  | 167.6         | 115.1        | 40.98       | A POS      |
|              |              | Complete  | 162.5         | 83           | 31.43       | O POS      |
|              |              | Complete  | 180.3         | 97.5         | 29.99       | O NEG      |
|              |              | Complete  | 172.7         | 76.3         | 25.58       | O POS      |
|              |              | Complete  | 157.4         | 90.9         | 36.69       | A POS      |
|              |              | Complete  | 170           | 77.1         | 26.68       | O POS      |
|              |              | Complete  | 160           | 57.6         | 22.5        | A NEG      |
| No           | No           | Complete  | 165.1         | 72.2         | 26.49       | A POS      |
|              |              | Complete  | 165.1         | 108.1        | 39.66       | A NEG      |
| No           | No           | Complete  | 161.5         | 66.4         | 25.46       | O POS      |
| No           | No           | Complete  | 193           | 113.6        | 30.5        | UNK        |
| No           | No           | Complete  | 195           | 105.6        | 27.77       | O POS      |
| No           | No           | Complete  | 167.6         | 67.7         | 24.1        | B POS      |
| No           | No           | Complete  | 152           | 77.3         | 33.46       | O POS      |
| No           | Yes          | Complete  | 162.6         | 79.6         | 30.11       | O POS      |
| No           | Yes          | Complete  | 167.6         | 81           | 28.84       | A POS      |
| No           | Yes          | Complete  | 170.69        | 80.8         | 27.73       | A NEG      |
| No           | Yes          | Complete  | 160           | 81           | 31.64       | O POS      |
| No           | No           | Complete  | 177.8         | 86.4         | 27.33       | A POS      |

|     |     |          |        |       |       |       |
|-----|-----|----------|--------|-------|-------|-------|
| No  | Yes | Complete | 152.4  | 122.7 | 52.83 | B POS |
| No  | Yes | Complete | 171.4  | 104   | 35.4  | O POS |
| No  | No  | Complete | 173.74 | 74.2  | 24.58 | O POS |
|     |     | Complete | 157.5  | 86.9  | 35.03 | A POS |
| No  | Yes | Complete | 178    | 62.5  | 19.73 | A POS |
|     |     | Complete | 175.3  | 63.5  | 20.66 | O POS |
|     |     | Complete | 167.6  | 84.1  | 29.94 | A POS |
| No  | No  | Complete | 167.6  | 81    | 28.84 | O POS |
| No  | No  | Complete | 175.3  | 82.6  | 26.88 | O POS |
| No  | No  | Complete | 177.8  | 88.8  | 28.09 | O POS |
| No  | No  | Complete | 180    | 79.5  | 24.54 | A POS |
| No  | Yes | Complete | 165.1  | 84    | 30.82 | O POS |
| No  | No  | Complete | 160    | 60.7  | 23.71 | A POS |
| No  | No  | Complete | 157.4  | 81.3  | 32.82 | O POS |
| No  | Yes | Complete | 157.4  | 72.7  | 29.34 | O POS |
|     |     | Complete | 155.45 | 89.5  | 37.04 | A POS |
| Yes | Yes | Complete | 185.4  | 87.6  | 25.49 | A POS |
| No  | No  | Complete | 152.4  | 75    | 32.29 | A POS |
|     |     | Complete | 185    | 105.9 | 30.94 | O POS |
|     |     | Complete | 177.8  | 81.6  | 25.81 | O POS |
| No  | No  | Complete | 203.2  | 145.2 | 35.17 | O POS |
|     |     | Complete | 157    | 59    | 23.94 | B POS |
| No  | Yes | Complete | 170.2  | 113.4 | 39.15 | B POS |
|     |     | Complete | 180.3  | 104   | 31.99 | O POS |
|     |     | Complete | 160    | 74    | 28.91 | O POS |
|     |     | Complete | 177    | 82.3  | 26.27 | O POS |
| No  | No  | Complete | 154.9  | 90.7  | 37.8  | O POS |
| No  | No  | Complete | 162    | 72    | 27.43 | B POS |
| No  | No  | Complete | 172.7  | 100   | 33.53 | O POS |
|     |     | Complete | 164    | 81.8  | 30.41 | A POS |
| No  | Yes | Complete | 172.7  | 70.5  | 23.64 | B POS |
| No  | Yes | Complete | 165.1  | 84.1  | 30.85 | A POS |
|     |     | Complete | 162.5  | 77.2  | 29.24 | O POS |
| No  | No  | Complete | 167.4  | 75.9  | 27.09 | O POS |
| No  | Yes | Complete | 164.9  | 63.5  | 23.35 | O POS |
| No  | Yes | Complete | 172.7  | 84    | 28.16 | O POS |
| No  | Yes | Complete | 149.9  | 70.3  | 31.29 | O POS |
| No  | No  | Complete | 160    | 74.1  | 28.95 | A POS |
| No  | No  | Complete | 167.6  | 77.3  | 27.52 | O POS |
|     |     | Complete | 160.02 | 79.1  | 30.89 | B POS |
|     |     | Complete | 165.1  | 95.5  | 35.04 | A POS |
| No  | No  | Complete | 165.1  | 102   | 37.42 | O POS |
| No  | No  | Complete | 177.8  | 71.2  | 22.52 | O POS |

|    |     |          |        |         |              |
|----|-----|----------|--------|---------|--------------|
| No | No  | Complete | 152.4  | 72.7    | 31.3 O POS   |
| No | No  | Complete | 168    | 81.6    | 28.91 A POS  |
| No | No  | Complete | 161.5  | 76.4    | 29.29 A POS  |
| No | No  | Complete | 172.2  | 59      | 19.9 A POS   |
| No | No  | Complete | 170.1  | 88      | 30.41 A POS  |
|    |     | Complete | 167.6  | 90.7    | 32.29 O POS  |
| No | No  | Complete | 179.8  | 79.5    | 24.59 A POS  |
|    |     | Complete | 170.1  | 77.2    | 26.68 O POS  |
| No | Yes | Complete | 157.4  | 67      | 27.04 O POS  |
| No | No  | Complete | 171.36 | 81.1    | 27.62 O POS  |
| No | Yes | Complete | 157.4  | 109     | 44 O POS     |
| No | No  | Complete | 160.02 | 91      | 35.54 O POS  |
| No | No  | Complete | 190    | 128     | 35.46 B POS  |
| No | Yes | Complete | 182.88 | 81.3    | 24.31 A POS  |
| No | No  | Complete | 170.18 | 49.9 NA | O POS        |
| No | No  | Complete | 170.2  | 44.8    | 15.47 O POS  |
| No | Yes | Complete | 180.34 | 118     | 36.28 O POS  |
| No | No  | Complete | 172.72 | 106.6   | 35.73 A POS  |
| No | No  | Complete | 152.4  | 68      | 29.28 A POS  |
| No | No  | Complete | 167    | 75.1    | 26.93 O POS  |
| No | Yes | Complete | 182.88 | 78.9    | 23.59 O POS  |
| No | No  | Complete | 160.02 | 86.4    | 33.74 O POS  |
| No | No  | Complete | 182.88 | 81.8    | 24.46 O POS  |
| No | No  | Complete | 165.1  | 72.6    | 26.63 O POS  |
| No | No  | Complete | 157.48 | 63.6    | 25.65 O POS  |
| No | Yes | Complete | 152.4  | 73.6    | 31.69 O POS  |
| No | No  | Complete | 167.64 | 109.1   | 38.82 O POS  |
| No | No  | Complete | 170.18 | 77.3    | 26.69 B POS  |
|    |     | Complete | 149.9  | 62.1    | 27.64 A POS  |
| No | Yes | Complete | 149    | 75      | 33.78 O POS  |
| No | No  | Complete | 160    | 56.8    | 22.19 A POS  |
| No | Yes | Complete | 162.56 | 72.7    | 27.51 AB POS |
|    |     | Complete | 172.2  | 84.1    | 28.36 A POS  |
|    |     | Complete | 165.1  | 75.3    | 27.62 O POS  |
| No | No  | Complete | 187.9  | 88.5    | 25.07 O POS  |
| No | No  | Complete | 167.6  | 80.6    | 28.69 A POS  |
| No | No  | Complete | 167.6  | 77.3    | 27.52 O POS  |

| ABO.Blood.T | RH.Status | Code.Status | Was.the.pati | Does.the.pat | Is.patient.cu | Current.Canc |
|-------------|-----------|-------------|--------------|--------------|---------------|--------------|
| O           | Positive  | Full Code   | No           | No           |               | No           |
| A           | Positive  | Full Code   |              | No           |               | No           |
| O           | Positive  | Full Code   |              | No           |               | No           |
| O           | Positive  | Full Code   |              | No           |               | No           |
| O           | Positive  | DNR/DNI     |              | No           |               | No           |
| A           | Positive  | Full Code   |              | No           |               | No           |
| O           | Positive  | Full Code   |              | Yes          | No            | No           |
| A           | Positive  | Full Code   | No           | No           |               | No           |
| O           | Positive  | Full Code   |              | No           |               | No           |
| O           | Positive  | DNR/DNI     | Yes          | Yes          | No            | No           |
| O           | Positive  | DNR/DNI     | Yes          | No           |               | No           |
| O           | Positive  | Full Code   |              | Yes          | No            | No           |
| O           | Positive  | DNR/DNI     |              | No           |               | No           |
| A           | Negative  | Full Code   |              | No           |               | No           |
| A           | Negative  | Full Code   |              | No           |               | No           |
| O           | Positive  | Full Code   | No           | No           |               | No           |
| A           | Positive  | DNR         |              | No           |               | No           |
| O           | Positive  | Full Code   |              | No           |               | No           |
| O           | Positive  | Full Code   |              | No           |               | No           |
| O           | Positive  |             |              | No           |               | No           |
| A           | Positive  | Full Code   |              | No           |               | No           |
| O           | Positive  | DNR         |              | No           |               | No           |
| A           | Positive  | Full Code   | No           | No           |               | No           |
| A           | Positive  | Full Code   | No           | No           |               | No           |
| O           | Positive  | Full Code   | No           | No           |               | No           |
| O           | Negative  | DNR/DNI     |              | Yes          | No            | No           |
| O           | Positive  | Full Code   |              | No           |               | No           |
| A           | Positive  | DNR         | No           | No           |               | No           |
| O           | Positive  | DNR/DNI     |              | No           |               | No           |
| A           | Negative  | Full Code   | No           | Yes          | No            | No           |
| A           | Positive  | Full Code   |              | No           |               | No           |
| A           | Negative  | Full Code   | No           | No           |               | No           |
|             |           | Full Code   | No           | No           |               | No           |
|             |           | DNR         |              | No           |               | No           |
| O           | Positive  | Full Code   |              | No           |               | No           |
| B           | Positive  | DNR/DNI     | No           | No           |               | No           |
| O           | Positive  | DNR         | No           | No           |               | No           |
| O           | Positive  | DNR/DNI     | No           | No           |               | No           |
| A           | Positive  | Full Code   |              | No           |               | No           |
| A           | Negative  | Full Code   |              | Yes          | No            | No           |
| O           | Positive  | Full Code   |              | No           |               | No           |
| A           | Positive  | Full Code   |              | No           |               | No           |



|   |          |           |    |     |    |    |
|---|----------|-----------|----|-----|----|----|
| B | Positive | Full Code | No | No  |    | No |
| O | Positive | Full Code |    | No  |    | No |
| O | Positive | Full Code |    | No  |    | No |
| A | Positive | Full Code | No | No  |    | No |
| A | Positive | DNR/DNI   |    | No  |    | No |
| O | Positive | DNR/DNI   |    | No  |    | No |
| A | Positive | DNR/DNI   |    | No  |    | No |
| O | Positive | Full Code |    | No  |    | No |
| O | Positive | Full Code |    | No  |    | No |
| O | Positive | Full Code | No | Yes | No | No |
| A | Positive | Full Code |    | No  |    | No |
| O | Positive | Full Code | No | Yes | No | No |
| A | Positive | DNR       | No | No  |    | No |
| O | Positive | Full Code | No | Yes | No | No |
| O | Positive | Full Code |    | No  |    | No |
| A | Positive | DNR/DNI   |    | No  |    | No |
| A | Positive | DNR       |    | No  |    | No |
| A | Positive | Full Code |    | No  |    | No |
| O | Positive | Full Code |    | No  |    | No |
|   |          | DNR/DNI   |    | No  |    | No |
| O | Positive | DNR       |    | No  |    | No |
| B | Positive | DNR/DNI   |    | No  |    | No |
| B | Positive | DNR/DNI   |    | No  |    | No |
| O | Positive | Full Code |    | No  |    | No |
| O | Positive | Full Code |    | No  |    | No |
| O | Positive | DNR       |    | No  |    | No |
| O | Positive | Full Code | No | No  |    | No |
| B | Positive | Full Code | No | No  |    | No |
| O | Positive | Full Code |    | Yes | No | No |
| A | Positive | Full Code |    | No  |    | No |
| B | Positive | Full Code |    | No  |    | No |
| A | Positive | Full Code |    | No  |    | No |
| O | Positive | Full Code |    | No  |    | No |
| O | Positive | Full Code |    | No  |    | No |
| O | Positive | Full Code |    | No  |    | No |
| O | Positive | Full Code | No | No  |    | No |
| A | Positive | Full Code |    | No  |    | No |
| O | Positive | Full Code |    | No  |    | No |
| B | Positive | Full Code | No | No  |    | No |
| A | Positive | DNR       |    | No  |    | No |
| O | Positive | Full Code |    | No  |    | No |
| O | Positive | Full Code |    | No  |    | No |

|    |          |           |    |     |     |     |
|----|----------|-----------|----|-----|-----|-----|
| O  | Positive | Full Code |    | No  |     | No  |
| A  | Positive | Full Code |    | No  |     | No  |
| A  | Positive | Full Code |    | No  |     | No  |
| A  | Positive | Full Code |    | No  |     | No  |
| A  | Positive | Full Code |    | No  |     | No  |
| O  | Positive | Full Code | No | No  |     | No  |
| A  | Positive | Full Code |    | No  |     | No  |
| O  | Positive | Full Code |    | No  |     | No  |
| O  | Positive | DNR/DNI   | No | No  |     | No  |
| O  | Positive | Full Code |    | No  |     | No  |
| O  | Positive | Full Code | No | Yes | No  | No  |
| O  | Positive | DNR       | No | No  |     | No  |
| B  | Positive | Full Code |    | No  |     | No  |
| A  | Positive | Full Code |    | No  |     | No  |
|    |          | Full Code | No | No  |     | No  |
| O  | Positive | Full Code | No | No  |     | No  |
| O  | Positive | Full Code |    | No  |     | No  |
| A  | Positive | Full Code |    | No  |     | No  |
| A  | Positive | DNR/DNI   |    | Yes | No  | No  |
| O  | Positive | DNR       |    | No  |     | No  |
| O  | Positive | Full Code |    | No  |     | No  |
| O  | Positive | DNR       | No | No  |     | No  |
| O  | Positive | DNR/DNI   |    | Yes | No  | No  |
| O  | Positive | Full Code | No | No  |     | No  |
| O  | Positive | Full Code |    | No  |     | No  |
| O  | Positive | Full Code | No | No  |     | No  |
| O  | Positive | Full Code |    | No  |     | No  |
| B  | Positive | DNR       |    | No  |     | No  |
| A  | Positive | DNR       | No | No  |     | No  |
| O  | Positive | Full Code | No | No  |     | No  |
| A  | Positive | DNR/DNI   | No | No  |     | No  |
| AB | Positive | DNR/DNI   | No | No  |     | No  |
| A  | Positive | DNR/DNI   |    | No  |     | No  |
| O  | Positive | DNR       |    | No  |     | No  |
| O  | Positive | Full Code |    | Yes | Yes | Yes |
| A  | Positive | Full Code | No | No  |     | No  |
| O  | Positive | UNK       |    | No  |     | No  |

| Current.Canc | Current.Canc | Current.Canc | Please.specif | Does.the.pat | Please.specif | Please.specif |
|--------------|--------------|--------------|---------------|--------------|---------------|---------------|
| No           | No           | No           | NA            | Yes          | Yes           | No            |
| No           | No           | No           | NA            | Yes          | No            | No            |
| No           | No           | No           | NA            | Yes          | Yes           | No            |
| No           | No           | No           | NA            | Yes          | Yes           | No            |
| No           | No           | No           | NA            | Yes          | Yes           | Yes           |
| No           | No           | No           | NA            | Yes          | Yes           | Yes           |
| No           | No           | No           | NA            | Yes          | Yes           | No            |
| No           | No           | No           | NA            | Yes          | Yes           | No            |
| No           | No           | No           | NA            | Yes          | Yes           | Yes           |
| No           | No           | No           | NA            | Yes          | Yes           | No            |
| No           | No           | No           | NA            | No           | No            | No            |
| No           | No           | No           | NA            | Yes          | No            | No            |
| No           | No           | No           | NA            | Yes          | Yes           | No            |
| No           | No           | No           | NA            | Yes          | Yes           | No            |
| No           | No           | No           | NA            | Yes          | Yes           | No            |
| No           | No           | No           | NA            | Yes          | No            | Yes           |
| No           | No           | No           | NA            | No           | No            | No            |
| No           | No           | No           | NA            | Yes          | Yes           | No            |
| No           | No           | No           | NA            | No           | No            | No            |
| No           | No           | No           | NA            | Yes          | Yes           | No            |
| No           | No           | No           | NA            | Yes          | Yes           | No            |
| No           | No           | No           | NA            | Yes          | Yes           | Yes           |
| No           | No           | No           | NA            | No           | No            | No            |
| No           | No           | No           | NA            | Yes          | Yes           | No            |
| No           | No           | No           | NA            | Yes          | Yes           | No            |
| No           | No           | No           | NA            | Yes          | No            | No            |
| No           | No           | No           | NA            | Yes          | Yes           | No            |
| No           | No           | No           | NA            | Yes          | No            | No            |
| No           | No           | No           | NA            | Yes          | Yes           | No            |
| No           | No           | No           | NA            | No           | No            | No            |
| No           | No           | No           | NA            | No           | No            | No            |
| No           | No           | No           | NA            | Yes          | Yes           | No            |
| No           | No           | No           | NA            | No           | No            | No            |
| No           | No           | No           | NA            | No           | No            | No            |
| No           | No           | No           | NA            | Yes          | Yes           | Yes           |
| No           | No           | No           | NA            | No           | No            | No            |

|    |    |    |    |     |     |     |
|----|----|----|----|-----|-----|-----|
| No | No | No | NA | No  | No  | No  |
| No | No | No | NA | No  | No  | No  |
| No | No | No | NA | No  | No  | No  |
| No | No | No | NA | No  | No  | No  |
| No | No | No | NA | Yes | No  | Yes |
| No | No | No | NA | Yes | Yes | Yes |
| No | No | No | NA | Yes | Yes | Yes |
| No | No | No | NA | Yes | Yes | No  |
| No | No | No | NA | Yes | No  | No  |
| No | No | No | NA | Yes | Yes | No  |
| No | No | No | NA | No  | No  | No  |
| No | No | No | NA | Yes | Yes | No  |
| No | No | No | NA | Yes | Yes | No  |
| No | No | No | NA | Yes | Yes | No  |
| No | No | No | NA | Yes | Yes | No  |
| No | No | No | NA | No  | No  | No  |
| No | No | No | NA | Yes | Yes | No  |
| No | No | No | NA | Yes | Yes | No  |
| No | No | No | NA | Yes | Yes | No  |
| No | No | No | NA | Yes | Yes | No  |
| No | No | No | NA | Yes | Yes | No  |
| No | No | No | NA | Yes | Yes | No  |
| No | No | No | NA | Yes | Yes | No  |
| No | No | No | NA | Yes | Yes | No  |
| No | No | No | NA | Yes | Yes | No  |
| No | No | No | NA | Yes | Yes | No  |
| No | No | No | NA | No  | No  | No  |
| No | No | No | NA | Yes | No  | No  |
| No | No | No | NA | Yes | Yes | No  |
| No | No | No | NA | Yes | Yes | Yes |
| No | No | No | NA | No  | No  | No  |
| No | No | No | NA | No  | No  | No  |
| No | No | No | NA | Yes | Yes | Yes |
| No | No | No | NA | Yes | Yes | No  |
| No | No | No | NA | No  | No  | No  |
| No | No | No | NA | No  | No  | No  |
| No | No | No | NA | Yes | Yes | Yes |
| No | No | No | NA | No  | No  | No  |
| No | No | No | NA | Yes | Yes | No  |

|    |    |    |    |     |     |     |
|----|----|----|----|-----|-----|-----|
| No | No | No | NA | No  | No  | No  |
| No | No | No | NA | No  | No  | No  |
| No | No | No | NA | Yes | Yes | Yes |
| No | No | No | NA | Yes | Yes | No  |
| No | No | No | NA | Yes | Yes | No  |
| No | No | No | NA | No  | No  | No  |
| No | No | No | NA | Yes | Yes | Yes |
| No | No | No | NA | No  | No  | No  |
| No | No | No | NA | Yes | Yes | No  |
| No | No | No | NA | Yes | Yes | No  |
| No | No | No | NA | Yes | Yes | No  |
| No | No | No | NA | Yes | Yes | No  |
| No | No | No | NA | No  | No  | No  |
| No | No | No | NA | Yes | No  | No  |
| No | No | No | NA | Yes | Yes | No  |
| No | No | No | NA | Yes | No  | No  |
| No | No | No | NA | Yes | Yes | No  |
| No | No | No | NA | Yes | Yes | Yes |
| No | No | No | NA | No  | No  | No  |
| No | No | No | NA | Yes | No  | No  |
| No | No | No | NA | No  | No  | No  |
| No | No | No | NA | Yes | Yes | No  |
| No | No | No | NA | Yes | Yes | No  |
| No | No | No | NA | No  | No  | No  |
| No | No | No | NA | Yes | Yes | No  |
| No | No | No | NA | Yes | Yes | Yes |
| No | No | No | NA | No  | No  | No  |
| No | No | No | NA | No  | No  | No  |
| No | No | No | NA | Yes | Yes | Yes |
| No | No | No | NA | No  | No  | No  |

Please specify Does the patient Please specify Please specify Please specify

|     |     |              |     |     |     |     |
|-----|-----|--------------|-----|-----|-----|-----|
| No  | No  |              | No  | No  | No  | No  |
| No  | Yes | hyperlipidem | No  | No  | No  | No  |
| No  | No  |              | No  | No  | No  | No  |
| No  | Yes | high cholest | No  | No  | No  | No  |
| No  | No  |              | No  | No  | No  | No  |
| No  | No  |              | Yes | No  | No  | Yes |
| No  | No  |              | No  | No  | No  | No  |
| No  | No  |              | No  | No  | No  | No  |
| No  | Yes | dyslipidemia | No  | No  | No  | No  |
| No  | No  |              | No  | No  | No  | No  |
| No  | No  |              | No  | No  | No  | No  |
| No  | Yes | PPM, HLD     | No  | No  | No  | No  |
| No  | No  |              | Yes | No  | No  | Yes |
| No  | No  |              | Yes | No  | No  | No  |
| No  | No  |              | Yes | No  | No  | No  |
| No  | No  |              | No  | No  | No  | No  |
| No  | Yes | HLD          | No  | No  | No  | No  |
| No  | No  |              | No  | No  | No  | No  |
| No  | No  |              | No  | No  | No  | No  |
| No  | No  |              | No  | No  | No  | No  |
| No  | No  |              | Yes | No  | No  | No  |
| No  | No  |              | No  | No  | No  | No  |
| Yes | No  |              | No  | No  | No  | No  |
| Yes | No  |              | No  | No  | No  | No  |
| Yes | No  |              | No  | No  | No  | No  |
| No  | No  |              | No  | No  | No  | No  |
| No  | No  |              | No  | No  | No  | No  |
| No  | No  |              | No  | No  | No  | No  |
| No  | No  |              | No  | No  | No  | No  |
| No  | Yes | Afib         | No  | No  | No  | No  |
| No  | No  |              | Yes | No  | Yes | No  |
| No  | No  |              | Yes | Yes | No  | No  |
| No  | No  |              | No  | No  | No  | No  |
| No  | Yes | elevated cho | No  | No  | No  | No  |
| No  | Yes | hyperlipidem | No  | No  | No  | No  |
| No  | No  |              | No  | No  | No  | No  |
| No  | No  |              | No  | No  | No  | No  |
| Yes | Yes | hyperlipidem | Yes | Yes | No  | No  |
| No  | No  |              | No  | No  | No  | No  |
| No  | No  |              | No  | No  | No  | No  |
| Yes | Yes | Hyperlipidem | Yes | No  | Yes | No  |
| No  | No  |              | No  | No  | No  | No  |

|    |     |                |     |     |     |    |
|----|-----|----------------|-----|-----|-----|----|
| No | No  |                | No  | No  | No  | No |
| No | No  |                | No  | No  | No  | No |
| No | No  |                | No  | No  | No  | No |
| No | No  |                | No  | No  | No  | No |
| No | Yes | afib           | No  | No  | No  | No |
| No | Yes | afib           | No  | No  | No  | No |
| No | No  |                | No  | No  | No  | No |
| No | No  |                | No  | No  | No  | No |
| No | Yes | cholesterol    | Yes | Yes | No  | No |
| No | No  |                | No  | No  | No  | No |
| No | No  |                | No  | No  | No  | No |
| No | No  |                | No  | No  | No  | No |
| No | No  |                | No  | No  | No  | No |
| No | No  |                | No  | No  | No  | No |
| No | No  |                | No  | No  | No  | No |
| No | Yes | cardiomyopa    | Yes | No  | Yes | No |
| No | No  |                | No  | No  | No  | No |
| No | No  |                | No  | No  | No  | No |
| No | Yes | hyperlipidem   | No  | No  | No  | No |
| No | No  |                | No  | No  | No  | No |
| No | Yes | cardiomyopa    | No  | No  | No  | No |
| No | No  |                | No  | No  | No  | No |
| No | Yes | A Fib          | No  | No  | No  | No |
| No | Yes | HLD            | No  | No  | No  | No |
| No | No  |                | No  | No  | No  | No |
| No | No  |                | No  | No  | No  | No |
| No | No  |                | Yes | Yes | No  | No |
| No | No  |                | No  | No  | No  | No |
| No | Yes | high cholestε  | No  | No  | No  | No |
| No | No  |                | No  | No  | No  | No |
| No | No  |                | No  | No  | No  | No |
| No | Yes | HLD            | No  | No  | No  | No |
| No | No  |                | No  | No  | No  | No |
| No | No  |                | No  | No  | No  | No |
| No | No  |                | No  | No  | No  | No |
| No | No  |                | No  | No  | No  | No |
| No | Yes | aortic valve r | No  | No  | No  | No |
| No | No  |                | No  | No  | No  | No |
| No | No  |                | No  | No  | No  | No |
| No | No  |                | No  | No  | No  | No |
| No | Yes | HLD            | No  | No  | No  | No |
| No | No  |                | No  | No  | No  | No |
| No | No  |                | No  | No  | No  | No |

|     |     |                 |     |     |     |     |
|-----|-----|-----------------|-----|-----|-----|-----|
| No  | No  |                 | No  | No  | No  | No  |
| No  | No  |                 | No  | No  | No  | No  |
| No  | Yes | HLD             | Yes | No  | Yes | No  |
| No  | No  |                 | No  | No  | No  | No  |
| No  | No  |                 | No  | No  | No  | No  |
| No  | No  |                 | No  | No  | No  | No  |
| No  | No  |                 | No  | No  | No  | No  |
| No  | No  |                 | No  | No  | No  | No  |
| No  | No  |                 | No  | No  | No  | No  |
| No  | No  |                 | No  | No  | No  | No  |
| No  | No  |                 | Yes | Yes | No  | No  |
| No  | No  |                 | No  | No  | No  | No  |
| No  | No  |                 | No  | No  | No  | No  |
| No  | Yes | A-Fib           | No  | No  | No  | No  |
| No  | Yes | A-Fib           | No  | No  | No  | No  |
| No  | Yes | atrial fibrilla | No  | No  | No  | No  |
| No  | No  |                 | Yes | No  | No  | Yes |
| No  | No  |                 | Yes | No  | No  | No  |
| No  | Yes | high cholestr   | No  | No  | No  | No  |
| No  | No  |                 | No  | No  | No  | No  |
| No  | No  |                 | No  | No  | No  | No  |
| No  | No  |                 | No  | No  | No  | No  |
| No  | Yes | cardiac stent   | No  | No  | No  | No  |
| No  | No  |                 | No  | No  | No  | No  |
| No  | Yes | hyperlipidem    | Yes | No  | No  | No  |
| No  | No  |                 | No  | No  | No  | No  |
| No  | No  |                 | No  | No  | No  | No  |
| No  | No  |                 | No  | No  | No  | No  |
| No  | No  |                 | No  | No  | No  | No  |
| No  | No  |                 | No  | No  | No  | No  |
| No  | Yes | HLD, A Fib      | No  | No  | No  | No  |
| No  | Yes | HLD             | No  | No  | No  | No  |
| Yes | Yes | AF, PPM         | Yes | No  | Yes | No  |
| No  | No  |                 | No  | No  | No  | No  |
| No  | No  |                 | No  | No  | No  | No  |
| No  | Yes | CABG            | No  | No  | No  | No  |
| No  | No  |                 | No  | No  | No  | No  |



Please.specif Please.specif Does.the.pat Please.specif Please.specif Please.specif Please.specif

|     |                 |     |    |    |     |             |
|-----|-----------------|-----|----|----|-----|-------------|
| No  |                 | No  | No | No | No  |             |
| No  |                 | No  | No | No | No  |             |
| No  |                 | No  | No | No | No  |             |
| No  |                 | No  | No | No | No  |             |
| No  |                 | No  | No | No | No  |             |
| No  |                 | No  | No | No | No  |             |
| No  |                 | No  | No | No | No  |             |
| No  |                 | No  | No | No | No  |             |
| No  |                 | No  | No | No | No  |             |
| No  |                 | No  | No | No | No  |             |
| No  |                 | No  | No | No | No  |             |
| No  |                 | No  | No | No | No  |             |
| No  |                 | No  | No | No | No  |             |
| Yes | excerise-indt   | No  | No | No | No  |             |
| Yes | excersie-indt   | No  | No | No | No  |             |
| No  |                 | No  | No | No | No  |             |
| No  |                 | No  | No | No | No  |             |
| No  |                 | No  | No | No | No  |             |
| No  |                 | No  | No | No | No  |             |
| No  |                 | No  | No | No | No  |             |
| No  |                 | No  | No | No | No  |             |
| Yes | restrictive in: | Yes | No | No | Yes | prednisone  |
| No  |                 | No  | No | No | No  |             |
| No  |                 | No  | No | No | No  |             |
| No  |                 | No  | No | No | No  |             |
| No  |                 | No  | No | No | No  |             |
| No  |                 | No  | No | No | No  |             |
| No  |                 | No  | No | No | No  |             |
| No  |                 | No  | No | No | No  |             |
| No  |                 | No  | No | No | No  |             |
| No  |                 | No  | No | No | No  |             |
| No  |                 | No  | No | No | No  |             |
| No  |                 | No  | No | No | No  |             |
| No  |                 | No  | No | No | No  |             |
| No  |                 | No  | No | No | No  |             |
| No  |                 | No  | No | No | No  |             |
| No  |                 | No  | No | No | No  |             |
| No  |                 | No  | No | No | No  |             |
| No  |                 | No  | No | No | No  |             |
| No  |                 | No  | No | No | No  |             |
| Yes | ?asthma         | No  | No | No | No  |             |
| No  |                 | No  | No | No | No  |             |
| No  |                 | Yes | No | No | Yes | chemo/radia |
| No  |                 | Yes | No | No | Yes | ESRD        |
| No  |                 | No  | No | No | No  |             |





| Does.the.pat | Please.specif | Please.specif | Please.specif | Please.specif | Does.the.pat | Please.specif |
|--------------|---------------|---------------|---------------|---------------|--------------|---------------|
|--------------|---------------|---------------|---------------|---------------|--------------|---------------|

|     |     |     |     |     |     |    |
|-----|-----|-----|-----|-----|-----|----|
| No  | No  | No  | No  |     | No  | No |
| No  | No  | No  | No  |     | No  | No |
| No  | No  | No  | No  |     | No  | No |
| No  | No  | No  | No  |     | Yes | No |
| No  | No  | No  | No  |     | No  | No |
| No  | No  | No  | No  |     | No  | No |
| No  | No  | No  | No  |     | No  | No |
| No  | No  | No  | No  |     | No  | No |
| No  | No  | No  | No  |     | No  | No |
| No  | No  | No  | No  |     | No  | No |
| No  | No  | No  | No  |     | No  | No |
| No  | No  | No  | No  |     | No  | No |
| No  | No  | No  | No  |     | No  | No |
| No  | No  | No  | No  |     | No  | No |
| No  | No  | No  | No  |     | Yes | No |
| No  | No  | No  | No  |     | No  | No |
| No  | No  | No  | No  |     | No  | No |
| No  | No  | No  | No  |     | No  | No |
| No  | No  | No  | No  |     | No  | No |
| No  | No  | No  | No  |     | No  | No |
| No  | No  | No  | No  |     | No  | No |
| No  | No  | No  | No  |     | No  | No |
| No  | No  | No  | No  |     | No  | No |
| No  | No  | No  | No  |     | No  | No |
| No  | No  | No  | No  |     | No  | No |
| No  | No  | No  | No  |     | No  | No |
| No  | No  | No  | No  |     | No  | No |
| No  | No  | No  | No  |     | No  | No |
| Yes | No  | Yes | No  |     | No  | No |
| Yes | No  | Yes | No  |     | No  | No |
| Yes | No  | No  | Yes | CKD | No  | No |
| No  | No  | No  | No  |     | No  | No |
| No  | No  | No  | No  |     | No  | No |
| No  | No  | No  | No  |     | No  | No |
| No  | No  | No  | No  |     | No  | No |
| No  | No  | No  | No  |     | No  | No |
| No  | No  | No  | No  |     | No  | No |
| No  | No  | No  | No  |     | No  | No |
| No  | No  | No  | No  |     | No  | No |
| No  | No  | No  | No  |     | No  | No |
| No  | No  | No  | No  |     | No  | No |
| No  | No  | No  | No  |     | No  | No |
| No  | No  | No  | No  |     | No  | No |
| No  | No  | No  | No  |     | No  | No |
| No  | No  | No  | No  |     | No  | No |
| No  | No  | No  | No  |     | No  | No |
| No  | No  | No  | No  |     | No  | No |
| No  | No  | No  | No  |     | No  | No |
| No  | No  | No  | No  |     | No  | No |
| No  | No  | No  | No  |     | No  | No |
| No  | No  | No  | No  |     | No  | No |
| Yes | Yes | No  | No  |     | No  | No |
| No  | No  | No  | No  |     | No  | No |
| No  | No  | No  | No  |     | No  | No |
| Yes | No  | Yes | No  |     | No  | No |
| No  | No  | No  | No  |     | No  | No |





Please.specif Please.specif Please.specif Please.specif Does.the.pat Please.specif Please.specif

|    |    |     |                 |     |     |     |
|----|----|-----|-----------------|-----|-----|-----|
| No | No | No  |                 | Yes | No  | No  |
| No | No | No  |                 | Yes | Yes | No  |
| No | No | No  |                 | No  | No  | No  |
| No | No | Yes | fatty liver dis | Yes | Yes | No  |
| No | No | No  |                 | No  | No  | No  |
| No | No | No  |                 | Yes | Yes | No  |
| No | No | No  |                 | Yes | Yes | No  |
| No | No | No  |                 | Yes | No  | Yes |
| No | No | No  |                 | No  | No  | No  |
| No | No | No  |                 | Yes | No  | No  |
| No | No | No  |                 | No  | No  | No  |
| No | No | No  |                 | No  | No  | No  |
| No | No | Yes | Fatty Liver     | No  | No  | No  |
| No | No | No  |                 | No  | No  | No  |
| No | No | No  |                 | No  | No  | No  |
| No | No | No  |                 | Yes | No  | No  |
| No | No | No  |                 | Yes | No  | No  |
| No | No | No  |                 | Yes | Yes | No  |
| No | No | No  |                 | Yes | No  | No  |
| No | No | No  |                 | No  | No  | No  |
| No | No | No  |                 | No  | No  | No  |
| No | No | No  |                 | Yes | No  | Yes |
| No | No | No  |                 | Yes | No  | Yes |
| No | No | No  |                 | Yes | No  | No  |
| No | No | No  |                 | Yes | Yes | No  |
| No | No | No  |                 | Yes | Yes | No  |
| No | No | No  |                 | No  | No  | No  |
| No | No | No  |                 | No  | No  | No  |
| No | No | No  |                 | No  | No  | No  |
| No | No | No  |                 | Yes | No  | Yes |
| No | No | No  |                 | Yes | No  | No  |
| No | No | No  |                 | Yes | No  | No  |
| No | No | No  |                 | No  | No  | No  |
| No | No | No  |                 | Yes | Yes | No  |
| No | No | No  |                 | Yes | No  | No  |
| No | No | No  |                 | Yes | No  | No  |
| No | No | No  |                 | No  | No  | No  |
| No | No | No  |                 | Yes | Yes | No  |
| No | No | No  |                 | No  | No  | No  |

|    |     |     |               |     |     |
|----|-----|-----|---------------|-----|-----|
| No | No  | No  | Yes           | No  | Yes |
| No | No  | No  | Yes           | No  | Yes |
| No | No  | No  | No            | No  | No  |
| No | No  | No  | No            | No  | No  |
| No | No  | No  | No            | No  | No  |
| No | No  | No  | No            | No  | No  |
| No | No  | No  | Yes           | No  | No  |
| No | No  | No  | Yes           | No  | No  |
| No | No  | No  | No            | No  | No  |
| No | No  | No  | Yes           | Yes | No  |
| No | No  | No  | No            | No  | No  |
| No | No  | No  | No            | No  | No  |
| No | No  | No  | No            | No  | No  |
| No | No  | No  | Yes           | Yes | No  |
| No | No  | No  | No            | No  | No  |
| No | No  | No  | No            | No  | No  |
| No | No  | No  | Yes           | No  | No  |
| No | No  | No  | Yes           | Yes | No  |
| No | No  | No  | No            | No  | No  |
| No | Yes | No  | Yes           | No  | No  |
| No | No  | No  | Yes           | No  | Yes |
| No | No  | No  | No            | No  | No  |
| No | No  | No  | Yes           | No  | Yes |
| No | No  | No  | No            | No  | No  |
| No | No  | No  | No            | No  | No  |
| No | No  | No  | No            | No  | No  |
| No | No  | No  | Yes           | No  | Yes |
| No | Yes | No  | Yes           | Yes | No  |
| No | No  | No  | Yes           | Yes | No  |
| No | No  | No  | Yes           | Yes | No  |
| No | No  | No  | No            | No  | No  |
| No | No  | No  | Yes           | Yes | No  |
| No | No  | No  | Yes           | No  | No  |
| No | No  | No  | No            | No  | No  |
| No | No  | Yes | alcohol induc | Yes | No  |
| No | No  | No  | No            | No  | No  |
| No | No  | No  | Yes           | Yes | No  |
| No | No  | No  | Yes           | No  | No  |
| No | No  | No  | No            | No  | No  |
| No | No  | No  | No            | No  | No  |
| No | No  | No  | Yes           | No  | Yes |
| No | No  | No  | No            | No  | No  |
| No | No  | No  | Yes           | No  | No  |



|    |    |     |                 |     |     |
|----|----|-----|-----------------|-----|-----|
| No | No | No  | No              | No  | No  |
| No | No | No  | No              | No  | No  |
| No | No | No  | Yes             | No  | No  |
| No | No | No  | Yes             | No  | No  |
| No | No | No  | No              | No  | No  |
| No | No | No  | No              | No  | No  |
| No | No | No  | Yes             | No  | No  |
| No | No | No  | No              | No  | No  |
| No | No | No  | No              | No  | No  |
| No | No | No  | No              | No  | No  |
| No | No | No  | Yes             | No  | Yes |
| No | No | No  | No              | No  | No  |
| No | No | No  | Yes             | Yes | Yes |
| No | No | No  | No              | No  | No  |
| No | No | No  | No              | No  | No  |
| No | No | No  | No              | No  | No  |
| No | No | No  | Yes             | No  | No  |
| No | No | No  | Yes             | No  | Yes |
| No | No | No  | Yes             | No  | No  |
| No | No | No  | No              | No  | No  |
| No | No | No  | No              | No  | No  |
| No | No | No  | No              | No  | No  |
| No | No | No  | No              | No  | No  |
| No | No | No  | No              | No  | No  |
| No | No | No  | No              | No  | No  |
| No | No | No  | Yes             | No  | No  |
| No | No | No  | Yes             | No  | No  |
| No | No | No  | No              | No  | No  |
| No | No | No  | No              | No  | No  |
| No | No | No  | No              | No  | No  |
| No | No | No  | No              | No  | No  |
| No | No | No  | No              | No  | No  |
| No | No | No  | Yes             | No  | No  |
| No | No | Yes | fatty liver dis | Yes | No  |
| No | No | No  | Yes             | No  | No  |
| No | No | No  | Yes             | No  | No  |
| No | No | No  | No              | No  | No  |
| No | No | No  | No              | No  | No  |
| No | No | No  | No              | No  | No  |
| No | No | No  | No              | No  | No  |
| No | No | No  | Yes             | No  | No  |
| No | No | No  | No              | No  | No  |

| Please.specif | Please.specif | Please.specif | Has.the.patien | Please.specif | Has.the.patien | Please.specif |
|---------------|---------------|---------------|----------------|---------------|----------------|---------------|
| Yes           | No            |               | No             |               | UNK            | NA            |
| No            | No            |               | No             |               | UNK            | NA            |
| No            | No            |               | No             |               |                | NA            |
| No            | No            |               | Yes            | Past          |                | NA            |
| No            | No            |               | No             |               |                | NA            |
| Yes           | No            |               | No             |               |                | NA            |
| Yes           | No            |               | No             |               |                | NA            |
| Yes           | No            |               | UNK            |               | UNK            | NA            |
| No            | No            |               | Yes            | Past          |                | NA            |
| Yes           | No            |               | No             |               |                | NA            |
| No            | No            |               | Yes            | Past          |                | NA            |
| No            | No            |               | Yes            |               |                | NA            |
| No            | No            |               | No             |               |                | NA            |
| No            | No            |               | No             |               | UNK            | NA            |
| No            | No            |               | No             |               | UNK            | NA            |
| Yes           | No            |               | No             |               |                | NA            |
| Yes           | No            |               | No             |               |                | NA            |
| No            | No            |               | No             |               |                | NA            |
| No            | Yes           | prediabetes   | Yes            | Past          |                | NA            |
| No            | No            |               | No             |               |                | NA            |
| No            | No            |               | No             |               |                | NA            |
| No            | No            |               | No             |               |                | NA            |
| Yes           | No            |               | UNK            |               |                | NA            |
| Yes           | No            |               | No             |               |                | NA            |
| Yes           | No            |               | Yes            | Past          |                | NA            |
| Yes           | No            |               | No             |               |                | NA            |
| No            | No            |               | No             |               |                | NA            |
| Yes           | No            |               | No             |               |                | NA            |
| No            | No            |               | No             |               |                | NA            |
| No            | No            |               | UNK            |               |                | NA            |
| No            | No            |               | No             |               |                | NA            |
| Yes           | No            |               | No             |               |                | NA            |
| No            | No            |               | No             |               |                | NA            |
| Yes           | No            |               | UNK            |               | UNK            | NA            |
| No            | No            |               | No             |               | UNK            | NA            |
| No            | No            |               | No             |               | UNK            | NA            |
| No            | No            |               | UNK            |               | UNK            | NA            |
| Yes           | No            |               | Yes            | Past          | UNK            | NA            |
| Yes           | No            |               | UNK            |               | UNK            | NA            |
| No            | No            |               | Yes            | Past          | UNK            | NA            |
| Yes           | No            |               | Yes            | Current       | UNK            | NA            |
| No            | No            |               | No             |               | UNK            | NA            |

|     |     |             |     |      |     |    |
|-----|-----|-------------|-----|------|-----|----|
| Yes | No  |             | No  |      | UNK | NA |
| Yes | Yes | hypothyroid | No  |      | UNK | NA |
| No  | No  |             | UNK |      | UNK | NA |
| No  | No  |             | No  |      |     | NA |
| No  | No  |             | Yes | Past | UNK | NA |
| No  | No  |             | Yes | Past | UNK | NA |
| Yes | No  |             | UNK |      | UNK | NA |
| Yes | No  |             | No  |      | UNK | NA |
| No  | No  |             | Yes | Past | UNK | NA |
| Yes | No  |             | No  |      | No  | NA |
| No  | No  |             | No  |      | UNK | NA |
| No  | No  |             | Yes | Past | UNK | NA |
| No  | No  |             | No  |      | UNK | NA |
| Yes | No  |             | No  |      | UNK | NA |
| No  | No  |             | Yes | Past | UNK | NA |
| No  | No  |             | Yes | Past | No  | NA |
| Yes | No  |             | Yes | Past | UNK | NA |
| No  | No  |             | No  |      | UNK | NA |
| No  | No  |             | No  |      | UNK | NA |
| Yes | No  |             | Yes | Past | UNK | NA |
| Yes | No  |             | No  |      | UNK | NA |
| No  | No  |             | No  |      | UNK | NA |
| No  | No  |             | No  |      | UNK | NA |
| No  | No  |             | No  |      | UNK | NA |
| No  | No  |             | No  |      | UNK | NA |
| No  | No  |             | UNK |      | UNK | NA |
| Yes | No  |             | No  |      | No  | NA |
| No  | No  |             | No  |      | No  | NA |
| No  | No  |             | No  |      | UNK | NA |
| No  | No  |             | No  |      | UNK | NA |
| No  | No  |             | No  |      | UNK | NA |
| Yes | No  |             | No  |      | UNK | NA |
| Yes | No  |             | No  |      | UNK | NA |
| No  | No  |             | No  |      | No  | NA |
| Yes | No  |             | Yes | Past | UNK | NA |
| No  | No  |             | No  |      | UNK | NA |
| Yes | No  |             | No  |      | No  | NA |
| Yes | No  |             | No  |      | No  | NA |
| No  | No  |             | No  |      | UNK | NA |
| No  | No  |             | No  |      | No  | NA |
| Yes | No  |             | Yes | Past | UNK | NA |
| No  | No  |             | No  |      | No  | NA |
| Yes | No  |             | No  |      | No  | NA |

|     |     |               |      |     |    |
|-----|-----|---------------|------|-----|----|
| No  | No  | Yes           | Past | UNK | NA |
| No  | No  | No            |      | No  | NA |
| Yes | No  | No            |      | No  | NA |
| Yes | No  | No            |      | No  | NA |
| No  | No  | No            |      | No  | NA |
| No  | No  | No            |      | No  | NA |
| Yes | No  | Yes           | Past | UNK | NA |
| No  | No  | Yes           | Past | UNK | NA |
| No  | No  | Yes           | Past | UNK | NA |
| No  | No  | Yes           | Past | UNK | NA |
| No  | No  | No            |      | No  | NA |
| No  | No  | UNK           |      | UNK | NA |
| No  | No  | UNK           |      | UNK | NA |
| No  | No  | No            |      | No  | NA |
| No  | No  | No            |      |     | NA |
| No  | Yes | hypothyroidis | No   | UNK | NA |
| Yes | No  | No            |      | No  | NA |
| Yes | No  | Yes           | Past | UNK | NA |
| No  | No  | No            |      | No  | NA |
| No  | No  | No            |      | No  | NA |
| No  | No  | No            |      | No  | NA |
| No  | No  | No            |      | No  | NA |
| No  | No  | No            |      | No  | NA |
| No  | No  | Yes           | Past | UNK | NA |
| Yes | Yes | hypothyroidis | No   | No  | NA |
| Yes | No  | No            |      | No  | NA |
| No  | No  | No            |      | No  | NA |
| No  | No  | No            |      | No  | NA |
| No  | No  | No            |      | No  | NA |
| Yes | No  | No            |      | No  | NA |
| No  | No  | Yes           | Past | UNK | NA |
| Yes | No  | Yes           | Past | UNK | NA |
| Yes | No  | No            |      | No  | NA |
| No  | No  | UNK           |      | UNK | NA |
| No  | No  | No            |      | No  | NA |
| No  | No  | No            |      | No  | NA |
| Yes | No  | No            |      | No  | NA |
| No  | No  | No            |      | No  | NA |

| Complete..1 | ED.Temperat | ED.Pulse. | ED.Respirato | ED.Oxygen.S | ED.Oxygen.D    | Was.the.pati |
|-------------|-------------|-----------|--------------|-------------|----------------|--------------|
| Complete    | 97.8        | 122       | 25           | 98          | Nasal Cannul   | Yes          |
| Complete    | 102.3       | 103       | 28           | 92          | Room Air       | No           |
| Complete    | 98.3        | 94        | 22           | 99          | Non-Rebreat    | No           |
| Complete    | 100.1       | 83        | 25           | 89          | Room Air       | No           |
| Complete    | 99.7        | 94        | 18           | 86          | Nasal Cannul   | No           |
| Complete    | 98.7        | 75        | 20           | 98          | Nasal Cannul   | No           |
| Complete    | 97.9        | 108       | 20           | 88          | Room Air       | No           |
| Complete    | 98.1        | 106       | 26           | 98          | Ventilator     | No           |
| Complete    | 100.3       | 118       | 18           | 91          | Room Air       | No           |
| Complete    | 101.2       | 99        | 22           | 98          | Nasal Cannul   | No           |
| Complete    | 98.1        | 98        | 26           | 96          | Non-Rebreat    | No           |
| Complete    | 99          | 100       | 22           | 91          | Nasal Cannul   | No           |
| Complete    | 98          | 74        | 20           | 88          | Non-Rebreat    | No           |
| Complete    | 99.6        | 113       | 22           | 90          | Room Air       |              |
| Complete    | 98.7        | 96        | 32           | 91          | Ventilator     | No           |
| Complete    | 102.4       | 102       | 20           | 95          | Nasal Cannul   | Yes          |
| Complete    | 98.2        | 109       | 20           | 91          | Room Air       | No           |
| Complete    | 97.2        | 139       | 20           | 82          | Non-Rebreat    | No           |
| Complete    | 99.9        | 122       | 22           | 95          | Room Air       | No           |
| Complete    | 98.6        | 116       | 26           | 99          | Non-Rebreather | Mask         |
| Complete    | 98          | 119       | 23           | 89          | Non-Rebreat    | No           |
| Complete    | 99.9        | 92        | 22           | 91          | Room Air       | No           |
| Complete    | 98.9        | 66        | 18           | 100         | Nasal Cannula  |              |
| Complete    | 97.5        | 72        | 20           | 100         | Room Air       | No           |
| Complete    | 97.6        | 93        | 18           | 96          | Nasal Cannul   | No           |
| Complete    | 99.4        | 89        | 22           | 96          | Room Air       | No           |
| Complete    | 99.1        | 112       | 24           | 72          | Nasal Cannul   | No           |
| Complete    | 102.9       | 78        | 22           | 93          | Room Air       | No           |
| Complete    | 98.4        | 72        | 22           | 88          | Nasal Cannul   | No           |
| Complete    | 103.1       | 104       | 18           | 93          | Room Air       | No           |
| Complete    | 103.4       | 103       | 20           | 97          | Nasal Cannul   | No           |
| Complete    | 102.9       | 114       | 18           | 96          | Room Air       | No           |
| Complete    | 98.6        | 127       | 24           | 93          | Room Air       | No           |
| Complete    | 98.8        | 122       | 34           | 81          | Non-Rebreat    | No           |
| Complete    | 99.2        | 122       | 23           | 96          | Room Air       | No           |
| Complete    | 100.1       | 85        | 28           | 86          | Room Air       | No           |
| Complete    | 100.3       | 107       | 26           | 92          | Room Air       | No           |
| Complete    | 98.5        | 78        | 20           | 89          | Room Air       | No           |
| Complete    | 101.8       | 102       | 24           | 70          | Room Air       | No           |
| Complete    | 98          | 88        | 22           | 83          | Nasal Cannul   | No           |
| Complete    | 100.5       | 85        | 18           | 95          | Room Air       | No           |
| Complete    | 99.6        | 117       | 18           | 93          | Room Air       | No           |

|          |          |     |       |                 |     |
|----------|----------|-----|-------|-----------------|-----|
| Complete | 99.7     | 101 | 27    | 86 Room Air     | No  |
| Complete | 99.2     | 93  | 16    | 94 Room Air     | No  |
| Complete | 100.4    | 136 | 42    | 68 Nasal Cannul | No  |
| Complete | 99.9     | 143 | 20    | 70 Ventilator   | No  |
| Complete | 99.9     | 94  | 28    | 98 Nasal Cannul | No  |
| Complete | 99.4     | 102 | 16    | 77 Room Air     | No  |
| Complete | 98.8     | 65  | 22    | 99 Non-Rebreat  | No  |
| Complete | 102.7    | 115 | 30    | 96 Nasal Cannul | No  |
| Complete | 98.2     | 83  | 28    | 96 Room Air     | No  |
| Complete | 98.3     | 114 | 22    | 77 Non-Rebreat  | No  |
| Complete | 98.6     | 87  | 20    | 98 Room Air     | No  |
| Complete | 97.4     | 113 | 24    | 86 Nasal Cannul | No  |
| Complete | 101.2    | 79  | 20    | 93 Ventilator   | No  |
| Complete | 101.1    | 111 | 24    | 87 Nasal Cannul | No  |
| Complete | 99.6     | 105 | 24    | 94 Nasal Cannul | No  |
| Complete | 98.1     | 78  | 28    | 95 Nasal Cannul | No  |
| Complete | 98.3 NA  |     | 18 NA | Nasal Cannul    | No  |
| Complete | 102.9 NA |     | 22    | 80 Non-Rebreat  | No  |
| Complete | 100.2    | 102 | 22    | 91 Room Air     | Yes |
| Complete | 97.1     | 119 | 19    | 97 Room Air     |     |
| Complete | 99.6     | 70  | 22    | 93 Nasal Cannul | No  |
| Complete | 97.8     | 107 | 40    | 99 Non-Rebreat  | No  |
| Complete | 99.4     | 98  | 40    | 85 Room Air     | No  |
| Complete | 101.6    | 116 | 18    | 100 Room Air    | Yes |
| Complete | 98.1     | 75  | 20    | 90 Room Air     | No  |
| Complete | 98.3     | 105 | 34    | 84 Non-Rebreat  | No  |
| Complete | 98.2     | 116 | 22    | 95 Room Air     | No  |
| Complete | 99.6     | 92  | 20    | 95 Nasal Cannul | No  |
| Complete | 97.9     | 90  | 29    | 85 Nasal Cannul | No  |
| Complete | 98.6     | 106 | 21    | 93 Nasal Cannul | Yes |
| Complete | 98.7     | 117 | 42    | 93 Nasal Cannul | No  |
| Complete | 98.3     | 109 | 22    | 88 Room Air     | No  |
| Complete | 100.2    | 111 | 16    | 97 Room Air     | No  |
| Complete | 99       | 83  | 20    | 95 Room Air     | No  |
| Complete | 99       | 157 | 42    | 86 Nasal Cannul | No  |
| Complete | 100.7    | 90  | 17    | 92 Nasal Cannul | No  |
| Complete | 101.9    | 136 | 26    | 92 Non-Rebreat  | No  |
| Complete | 98       | 123 | 38    | 92 Room Air     | No  |
| Complete | 97.8     | 74  | 25    | 87 Room Air     | No  |
| Complete | 98.2     | 82  | 20    | 98 Nasal Cannul | Yes |
| Complete | 102.7    | 100 | 22    | 93 Non-Rebreat  | No  |
| Complete | 100.5    | 87  | 26    | 93 Ventilator   | No  |
| Complete | 99.6     | 76  | 20    | 94 Room Air     | No  |

|          |       |     |    |                 |     |
|----------|-------|-----|----|-----------------|-----|
| Complete | 100.3 | 170 | 48 | 92 Non-Rebreat  | Yes |
| Complete | 99.9  | 122 | 34 | 75 Room Air     | No  |
| Complete | 103.5 | 118 | 22 | 90 Non-Rebreat  | No  |
| Complete | 98.2  | 92  | 16 | 98 Room Air     | No  |
| Complete | 100.7 | 117 | 24 | 93 Room Air     | No  |
| Complete | 102.9 | 124 | 28 | 77 Nasal Cannul | No  |
| Complete | 98.7  | 111 | 24 | 84 Room Air     | No  |
| Complete | 97.6  | 93  | 22 | 84 Nasal Cannul | No  |
| Complete | 98.2  | 95  | 24 | 93 Non-Rebreat  | No  |
| Complete | 97.8  | 68  | 20 | 92 Room Air     | No  |
| Complete | 97.8  | 83  | 25 | 87 Room Air     | No  |
| Complete | 98    | 96  | 34 | 88 Ventilator   |     |
| Complete | 98.8  | 110 | 30 | 92 Ventilator   | No  |
| Complete | 98.4  | 95  | 19 | 93 Room Air     | No  |
| Complete | 100.9 | 72  | 20 | 97 Room Air     |     |
| Complete | 99.8  | 64  | 18 | 97 Room Air     | No  |
| Complete | 100.5 | 112 | 18 | 92 Room Air     | No  |
| Complete | 102.5 | 120 | 26 | 81 Room Air     | No  |
| Complete | 99    | 106 | 22 | 94 Nasal Cannul | No  |
| Complete | 99.9  | 119 | 30 | 95 Non-Rebreat  | No  |
| Complete | 98.5  | 113 | 22 | 89 Room Air     | No  |
| Complete | 97.9  | 82  | 28 | 88 Room Air     | No  |
| Complete | 99.8  | 79  | 22 | 99 Nasal Cannul | No  |
| Complete | 98.1  | 126 | 32 | 100 Non-Rebreat | No  |
| Complete | 99.8  | 118 | 28 | 60 Room Air     | No  |
| Complete | 98.9  | 97  | 22 | 94 Nasal Cannul | No  |
| Complete | 100.6 | 109 | 16 | 79 Room Air     | No  |
| Complete | 98.9  | 110 | 20 | 92 Room Air     | Yes |
| Complete | 102.1 | 121 | 17 | 89 Room Air     | No  |
| Complete | 100.9 | 109 | 26 | 86 Room Air     | No  |
| Complete | 98.3  | 125 | 20 | 100 Room Air    | No  |
| Complete | 97.6  | 86  | 22 | 77 Room Air     | No  |
| Complete | 97.6  | 71  | 20 | 92 Room Air     | No  |
| Complete | 98.6  | 92  | 24 | 96 Room Air     | No  |
| Complete | 103.1 | 99  | 18 | 92 Room Air     | No  |
| Complete | 98.4  | 74  | 18 | 99 Room Air     | No  |
| Complete | 97.8  | 74  | 25 | 87 Room Air     | No  |

| Was.the.pati | Was.the.pati | Was.the.pati | Admission..F | Admission..F | Admission..F | Admission..F |
|--------------|--------------|--------------|--------------|--------------|--------------|--------------|
| Yes          | Yes          |              | 101.6        | 102.3        | 100.8        | 99.7         |
|              |              |              | 103.1        | 98.7 NA      | NA           |              |
| No           | No           | No           | 104.5        | 101.2        | 100.6        | 100.7        |
| No           | No           |              | 101.9        | 101.7        | 98.2         | 98.4         |
| No           |              |              | 102.9        | 101.1        | 101.4 NA     |              |
| No           | No           | No           | 104.4        | 99.1         | 99.5         | 98.9         |
| No           | No           |              | 99.9         | 99.5 NA      | NA           |              |
| No           | No           |              | 102.5        | 100.2        | 101          | 99           |
| No           | No           | No           | 103          | 101.9        | 103          | 99.1         |
| No           |              |              | 102.5        | 98.7         | 102.5 NA     |              |
| No           | No           | No           | 99           | 98.5         | 98.2         | 98.1         |
| No           | No           | No           | 100.5        | 100.5        | 98.8         | 100          |
| No           | No           | No           | 102.7        | 99.3         | 101.6        | 100.2        |
|              |              |              | 102.9 NA     | NA           | NA           |              |
|              |              |              | 101.1        | 98.7 NA      | NA           |              |
| Yes          | No           | No           | 102.4        | 99.5         | 99           | 100          |
|              |              |              | 105.3        | 99.7 NA      | NA           |              |
| No           | No           | No           | 104.3        | 100.2        | 100.1        | 99           |
|              |              |              | 102.1 NA     | NA           | NA           |              |
|              |              | No           | 101.5 NA     | NA           | NA           |              |
| No           | No           |              | 98.7         | 98           | 98.7         | 98.4         |
| No           | No           | No           | 103.1        | 99           | 99.7         | 97.7         |
|              |              |              | 102.8 NA     | NA           | NA           |              |
| No           | No           | No           | 100.7        | 100.4        | 99.4         | 99           |
|              |              |              | 98.7         | 98.7 NA      | NA           |              |
| No           |              |              | 103.1        | 99           | 102.8 NA     |              |
| No           | Yes          | Yes          | 102.7        | 101.6        | 103.1        | 99.5         |
| No           | No           | No           | 102.9        | 99.3         | 99           | 99           |
|              |              |              | 99.8         | 99 NA        | NA           |              |
| No           | No           |              | 103.5        | 99.7         | 99           | 101.6        |
| No           | No           |              | 103.8        | 101.1        | 98.5         | 98.6         |
| Yes          |              |              | 103.5        | 99.9         | 101.9 NA     |              |
| No           |              |              | 103.1        | 101.9        | 99.2 NA      |              |
| Yes          | Yes          | Yes          | 101.1        | 99.1         | 97.3         | 97.4         |
| No           |              |              | 99.5         | 99.5         | 97.9 NA      |              |
| No           | No           |              | 100.1        | 98.9         | 99.6         | 98.9         |
| No           | No           |              | 106.5        | 103.3        | 101.7        | 103.4        |
| No           |              |              | 100.6        | 98.1         | 98.1 NA      |              |
| No           | No           | No           | 104.9        | 101.8        | 100.8        | 101          |
| No           | No           | No           | 100.3        | 98           | 98.4         | 98.3         |
|              |              |              | 103.1        | 99.7 NA      | NA           |              |
| No           |              |              | 100.7        | 100.3        | 98.1 NA      |              |



|     |     |     |       |          |          |       |
|-----|-----|-----|-------|----------|----------|-------|
| No  | No  | No  | 102.7 | 101      | 99.1     | 100   |
| No  |     |     | 103.4 | 98.2     | 97.8 NA  |       |
| No  | Yes | No  | 103.4 | 98.6     | 99       | 100.4 |
| No  | No  | No  | 102.5 | 102.2    | 99.5     | 101.2 |
| No  | No  | No  | 101.7 | 99.4     | 101.2    | 99.5  |
| No  | No  |     | 100.8 | 98.9     | 99.9     | 99.4  |
|     |     |     | 100.7 | 100.6 NA | NA       |       |
| No  | No  |     | 102.9 | 100.8    | 99.6     | 98.5  |
| No  | No  |     | 99.1  | 99.1     | 98.7     | 98.3  |
| No  | No  | No  | 100   | 99.1     | 99.2     | 98.4  |
| No  |     |     | 100.9 | 100.3    | 98.2 NA  |       |
| No  |     |     | 99.2  | 99.2     | 98.3 NA  |       |
| No  | No  |     | 103.6 | 100.8    | 100.8    | 100.2 |
| No  | No  | No  | 102.8 | 99.7     | 98.8     | 98.5  |
| No  | No  | No  | 103.7 | 98.5     | 98       | 98.5  |
| No  |     |     | 99.2  | 97.6     | 98.6 NA  |       |
| No  | No  | No  | 103.1 | 101      | 103.1    | 100.5 |
| No  | No  |     | 103   | 99       | 98.2     | 98.3  |
| Yes |     |     | 104.7 | 99       | 100.7 NA |       |
|     |     |     | 100   | 98.2     | 97.5     | 97.4  |
| No  | No  |     | 100.9 | 99.4     | 98.7     | 98.9  |
|     |     |     | 101.5 | 101.5 NA | NA       |       |
| No  | No  | No  | 101.9 | 99.5     | 98.6     | 99.9  |
| Yes |     |     | 101.6 | 99.8     | 98 NA    |       |
| No  | Yes | Yes | 102.7 | 101.4    | 101.7    | 100.2 |
| No  | No  | No  | 101.8 | 100.2    | 100.9    | 98.8  |
| No  |     |     | 98.5  | 98.5     | 98.5 NA  |       |
| No  | No  | No  | 103.1 | 99       | 100.4    | 100.4 |
| No  | No  |     | 100.8 | 99.8     | 99.5     | 98    |
| Yes |     |     | 103   | 99.1     | 97.2 NA  |       |
| No  | No  | No  | 104.3 | 100.2    | 101.4    | 98.7  |
|     |     |     | 102.3 | 98.9 NA  | NA       |       |
| No  | No  | No  | 104   | 99.9     | 103      | 99.5  |
| No  |     |     | 99.8  | 97.6     | 97.6 NA  |       |
| No  | No  |     | 104   | 99       | 99.6     | 104   |
| No  | No  | No  | 104.2 | 98.5     | 98.4     | 98    |
| Yes | No  | No  | 103.9 | 99.1     | 99.5     | 100.7 |
| No  | No  | No  | 99.3  | 98.9     | 98.3     | 98    |
|     |     |     | 99    | 98.9 NA  | NA       |       |
|     |     |     | 101.6 | 101.6 NA | NA       |       |
| No  |     |     | 102.7 | 98.1     | 99 NA    |       |
| No  | No  | No  | 104   | 100.5    | 100.2    | 101.2 |
| No  | No  | No  | 103.1 | 99.5     | 100.4    | 99    |

|     |     |     |          |          |          |       |
|-----|-----|-----|----------|----------|----------|-------|
| No  | No  | No  | 103.5    | 103.5    | 99.2     | 98.3  |
| No  |     |     | 102.4    | 100.1    | 98.9 NA  |       |
| No  | No  | No  | 103.1    | 98.5     | 102.1    | 102.6 |
| No  |     |     | 102.8    | 99.5     | 100.3 NA |       |
| No  | Yes |     | 103.2    | 100.4    | 102.7    | 99.1  |
| No  |     |     | 104.6    | 99.1     | 100.9 NA |       |
| No  |     |     | 102.5    | 100.9    | 98.3 NA  |       |
| No  | No  |     | 101.8    | 101.5    | 98.8     | 99.9  |
| No  | No  | No  | 98.9     | 98.4     | 98.4     | 98    |
| No  | No  |     | 99.3     | 98.7     | 98       | 99    |
| No  | Yes | No  | 103.6    | 101      | 100.1    | 103.3 |
|     |     |     | 100.3    | 99.9     | 98.7     | 99.9  |
| Yes |     |     | 101.1    | 100.8    | 100.4 NA |       |
| No  | No  | Yes | 102.8    | 102.8    | 99.2     | 99.7  |
|     |     |     | 100.9 NA | NA       | NA       |       |
| No  | No  | No  | 101      | 99.8     | 98.7     | 98.7  |
| No  | No  | No  | 103.5    | 98.2     | 98.7     | 101.9 |
| No  | Yes | No  | 103.5    | 100.3    | 100.2    | 102   |
| Yes |     |     | 98.9     | 98.3     | 97.9 NA  |       |
|     |     |     | 103.4    | 100.2 NA | NA       |       |
| No  |     |     | 101      | 98.5     | 97.9 NA  |       |
| No  | No  |     | 102.8    | 100.4    | 101.3    | 97.9  |
| No  | No  |     | 101.3    | 99       | 98.6     | 99.5  |
| No  | No  |     | 99.5     | 98.6     | 98       | 99.5  |
| No  | No  | No  | 100.4    | 98.2     | 98.6     | 98.1  |
| No  | No  | No  | 102.3    | 98.5     | 98.5     | 97.3  |
| Yes |     |     | 102.7    | 99.2     | 99.2 NA  |       |
|     |     |     | 105.5    | 102.6 NA | NA       |       |
| No  | No  | Yes | 103      | 99       | 98.5     | 99.3  |
| No  |     |     | 102.6    | 98.2     | 98.4 NA  |       |
| No  | No  | No  | 99.8     | 98.4     | 98.1     | 98.6  |
|     |     |     | 100.5    | 99.7 NA  | NA       |       |
|     |     |     | 101.5    | 99 NA    | NA       |       |
| No  | No  | Yes | 102.6    | 98.7     | 102.2    | 98.4  |
| No  |     |     | 103.1    | 100      | 99.3 NA  |       |
| No  | No  | No  | 101.5    | 98.5     | 99.1     | 99.6  |
|     |     |     | 99       | 98.9 NA  | NA       |       |

| Admission..F | Admission..F | Admission..F | Admission..L | Admission..M   | Admission..M      | Admission..M |
|--------------|--------------|--------------|--------------|----------------|-------------------|--------------|
| NA           | 137          | 52           | 81           | Ventilator     | Intubation        | Intubation   |
| NA           | 112          | 28           | 92           | Nasal Cannul   | Nasal Canula      | or less      |
| 98.7         | 119          | 60           | 99           | NIPPV (CPAP    | NIMV (CPAP,       | NIMV (CPAP,  |
| NA           | 83           | 36           | 82           | Non-Rebreat    | NIMV (CPAP,       | NIMV (CPAP,  |
| NA           | 157          | 50           | 95           | NIPPV (CPAP    | NIMV (CPAP,       | NIMV (CPAP,  |
| 98.5         | 113          | 55           | 87           | NIPPV (CPAP    | NIMV (CPAP,       | NIMV (CPAP,  |
| NA           | 108          | 28           | 88           | Nasal Cannul   | Nasal Canula      | or less      |
| NA           | 127          | 52           | 88           | Ventilator     | Intubation        | NIMV (CPAP,  |
| 99.1         | 149          | 73           | 30           | Ventilator     | Nasal Canula      | NIMV (CPAP,  |
| NA           | 147          | 40           | 86           | NIPPV (CPAP    | NIMV (CPAP,       | NIMV (CPAP,  |
| 98.4         | 117          | 48           | 81           | NIPPV (CPAP    | NIMV (CPAP,       | NIMV (CPAP,  |
| 98.8         | 107          | 35           | 91           | Nasal Cannul   | Nasal Canula      | Nasal Canula |
| 98.9         | 154          | 97           | 72           | Ventilator     | Intubation        | Intubation   |
| NA           | 113          | 37           | 85           | Nasal Cannula  |                   |              |
| NA           | 190          | 48           | 51           | Ventilator     | Intubation        |              |
| 96.8         | 160          | 60           | 6            | Ventilator     | Intubation        | Intubation   |
| NA           | 180          | 58           | 9            | Ventilator     | Intubation        |              |
| 99           | 163          | 48           | 72           | Ventilator     | Intubation        | Intubation   |
| NA           | 131          | 26           | 92           | Nasal Cannula  |                   |              |
| 99           | 145          | 52           | 2            | Ventilator     |                   |              |
| NA           | 119          | 24           | 86           | High-Flow      | NIMV (CPAP,       | NIMV (CPAP,  |
| 98.7         | 119          | 46           | 8            | Ventilator     | Intubation        | Intubation   |
| NA           | 134          | 28           | 70           | Non-Rebreather | Mask              |              |
| 98.7         | 98           | 33           | 87           | Nasal Cannul   | Nasal Canula      | Nasal Canula |
| NA           | 103          | 30           | 91           | Non-Rebreat    | NIMV (CPAP/BiPAP, | Hi Flo       |
| NA           | 140          | 42           | 85           | High-Flow      | NIMV (CPAP,       | NIMV (CPAP,  |
| 98.7         | 229          | 124          | 7            | Ventilator     | NIMV (CPAP,       | Intubation   |
| 98.9         | 156          | 103          | 80           | Ventilator     | Intubation        | Intubation   |
| NA           | 121          | 44           | 88           | NIPPV (CPAP    | NIMV (CPAP/BiPAP, | Hi Flo       |
| NA           | 188          | 59           | 78           | NIPPV (CPAP    | NIMV (CPAP,       | NIMV (CPAP,  |
| NA           | 114          | 34           | 82           | NIPPV (CPAP    | Nasal Canula      | NIMV (CPAP,  |
| NA           | 168          | 51           | 46           | Ventilator     | Intubation        | Intubation   |
| NA           | 127          | 41           | 93           | Nasal Cannul   | Nasal Canula      | Nasal Canula |
| 97.8         | 200          | 81           | 75           | Ventilator     | Intubation        | Intubation   |
| NA           | 122          | 26           | 96           | Nasal Cannul   | Nasal Canula      | Nasal Canula |
| NA           | 114          | 44           | 86           | Non-Rebreat    | NIMV (CPAP,       | NIMV (CPAP,  |
| NA           | 149          | 99           | 92           | Ventilator     | Intubation        | Intubation   |
| NA           | 107          | 40           | 89           | Nasal Cannul   | Nasal Canula      | Nasal Canula |
| 98.5         | 141          | 57           | 79           | Ventilator     | Intubation        | Intubation   |
| 98           | 134          | 34           | 79           | Non-Rebreat    | NIMV (CPAP,       | NIMV (CPAP,  |
| NA           | 108          | 26           | 87           | Non-Rebreat    | NIMV (CPAP,       | Nasal Canula |
| NA           | 117          | 32           | 92           | Nasal Cannul   | Nasal Canula      | Nasal Canula |

|    |       |     |     |                                           |
|----|-------|-----|-----|-------------------------------------------|
|    | 99.5  | 119 | 54  | 72 NIPPV (CPAP NIMV (CPAP, NIMV (CPAP,    |
| NA |       | 106 | 40  | 94 Non-Rebreath NIMV (CPAP, Nasal Canula  |
|    | 102.5 | 240 | 52  | 68 Ventilator Intubation Intubation       |
|    | 99    | 133 | 37  | 94 Ventilator NIMV (CPAP, NIMV (CPAP,     |
|    | 99.5  | 112 | 33  | 90 Non-Rebreath Nasal Canula NIMV (CPAP,  |
| NA |       | 139 | 36  | 77 Non-Rebreath NIMV (CPAP, NIMV (CPAP,   |
| NA |       | 164 | 34  | 53 Non-Rebreath NIMV (CPAP/BiPAP, Hi Flo  |
| NA |       | 115 | 55  | 90 Non-Rebreath Nasal Canula Nasal Canula |
| NA |       | 83  | 26  | 82 Venti Mask NIMV (CPAP, NIMV (CPAP,     |
|    | 99.6  | 114 | 34  | 77 Non-Rebreath NIMV (CPAP, NIMV (CPAP,   |
| NA |       | 118 | 30  | 98 Nasal Cannul Nasal Canula Nasal Canula |
| NA |       | 113 | 28  | 86 Nasal Cannul Nasal Canula Nasal Canula |
| NA |       | 115 | 42  | 86 Ventilator Intubation Intubation       |
|    | 99.4  | 122 | 42  | 86 Venti Mask NIMV (CPAP, NIMV (CPAP,     |
|    | 98.3  | 121 | 48  | 90 NIPPV (CPAP NIMV (CPAP, NIMV (CPAP,    |
| NA |       | 155 | 40  | 81 NIPPV (CPAP NIMV (CPAP, NIMV (CPAP,    |
|    | 101   | 150 | 52  | 78 Ventilator Intubation Intubation       |
| NA |       | 120 | 39  | 79 Ventilator NIMV (CPAP, NIMV (CPAP,     |
| NA |       | 144 | 44  | 56 Ventilator Intubation Intubation       |
| NA |       | 139 | 34  | 87 High-Flow NIMV (CPAP, NIMV (CPAP,      |
| NA |       | 100 | 28  | 85 High-Flow NIMV (CPAP, NIMV (CPAP,      |
| NA |       | 106 | 44  | 84 High-Flow NIMV (CPAP/BiPAP, Hi Flo     |
|    | 98.4  | 175 | 40  | 85 NIPPV (CPAP NIMV (CPAP, NIMV (CPAP,    |
| NA |       | 134 | 44  | 78 Ventilator Intubation Intubation       |
|    | 97.7  | 130 | 58  | 31 Ventilator Nasal Canula Nasal Canula   |
|    | 99.6  | 159 | 54  | 34 Ventilator NIMV (CPAP, Intubation      |
| NA |       | 120 | 28  | 87 Nasal Cannul Nasal Canula Nasal Canula |
|    | 100.9 | 135 | 89  | 99 Ventilator Intubation Intubation       |
| NA |       | 90  | 32  | 85 Nasal Cannul Nasal Canula Nasal Canula |
| NA |       | 158 | 55  | 64 Ventilator Intubation Intubation       |
|    | 99.1  | 149 | 110 | 93 Ventilator Intubation Intubation       |
| NA |       | 110 | 34  | 88 Nasal Cannul Nasal Canula or less      |
|    | 100.3 | 174 | 46  | 97 Ventilator Nasal Canula Intubation     |
| NA |       | 96  | 34  | 95 Non-Rebreath Nasal Canula Nasal Canula |
|    | 101.3 | 209 | 55  | 86 Ventilator Intubation Intubation       |
|    | 98.7  | 159 | 56  | 92 Ventilator NIMV (CPAP, NIMV (CPAP,     |
|    | 101.5 | 136 | 93  | 92 Ventilator Intubation Intubation       |
|    | 98.3  | 123 | 40  | 92 Non-Rebreath Nasal Canula Nasal Canula |
| NA |       | 74  | 36  | 87 Nasal Cannul Nasal Canula or less      |
| NA |       | 130 | 44  | 62 Ventilator Intubation                  |
| NA |       | 162 | 49  | 67 Ventilator Intubation Intubation       |
|    | 99    | 151 | 58  | 25 Ventilator Intubation NIMV (CPAP,      |
|    | 99.1  | 125 | 40  | 71 Ventilator NIMV (CPAP, NIMV (CPAP,     |

|    |       |     |    |                 |                      |              |
|----|-------|-----|----|-----------------|----------------------|--------------|
|    | 100.2 | 145 | 84 | 41 Ventilator   | Intubation           | Intubation   |
| NA |       | 163 | 48 | 16 Ventilator   | NIMV (CPAP,          | NIMV (CPAP/  |
|    | 101.2 | 144 | 70 | 90 Ventilator   | Intubation           | Intubation   |
| NA |       | 100 | 32 | 91 Nasal Cannul | Nasal Canula         | Nasal Canula |
| NA |       | 158 | 45 | 56 Ventilator   | NIMV (CPAP,          | NIMV (CPAP,  |
| NA |       | 156 | 50 | 38 Ventilator   | Intubation           | Intubation   |
| NA |       | 137 | 33 | 88 Nasal Cannul | Nasal Canula         | Nasal Canula |
| NA |       | 169 | 56 | 32 Ventilator   | Intubation           | Intubation   |
|    | 97.9  | 116 | 32 | 90 High-Flow    | NIMV (CPAP,          | NIMV (CPAP,  |
| NA |       | 88  | 28 | 92 Nasal Cannul | Nasal Canula         | Nasal Canula |
|    | 99.3  | 150 | 56 | 81 Ventilator   | Intubation           | Intubation   |
| NA |       | 114 | 45 | 38 Ventilator   | Intubation           | Intubation   |
| NA |       | 153 | 43 | 35 Ventilator   | Intubation           | Intubation   |
|    | 98.3  | 145 | 49 | 50 High-Flow    | Nasal Canula         | NIMV (CPAP,  |
| NA |       | 65  | 22 | 92 Room Air     |                      |              |
|    | 98.3  | 95  | 24 | 92 Nasal Cannul | Nasal Canula         | Nasal Canula |
|    | 101.7 | 146 | 40 | 64 Ventilator   | Intubation           | Intubation   |
|    | 99.4  | 146 | 62 | 0 Ventilator    | Nasal Canula         | Nasal Canula |
| NA |       | 108 | 42 | 90 Venti Mask   | NIMV (CPAP,          | NIMV (CPAP/  |
| NA |       | 129 | 34 | 19 Ventilator   | Intubation           |              |
| NA |       | 113 | 42 | 86 Nasal Cannul | Nasal Canula         | Nasal Canula |
| NA |       | 141 | 50 | 0 Ventilator    | Intubation           | Intubation   |
| NA |       | 159 | 52 | 84 High-Flow    | Nasal Canula         | NIMV (CPAP,  |
| NA |       | 134 | 41 | 74 Non-Rebreat  | Nasal Canula         | Nasal Canula |
|    | 98.8  | 130 | 90 | 33 Ventilator   | NIMV (CPAP,          | NIMV (CPAP,  |
|    | 100.1 | 129 | 92 | 36 Ventilator   | Intubation           | Intubation   |
| NA |       | 156 | 59 | 66 Ventilator   | NIMV (CPAP,          | Intubation   |
| NA |       | 138 | 58 | 29 Ventilator   | Intubation           |              |
|    | 98.9  | 145 | 50 | 29 Ventilator   | Intubation           | Intubation   |
| NA |       | 112 | 36 | 86 Non-Rebreat  | NIMV (CPAP,          | NIMV (CPAP/  |
|    | 98.6  | 148 | 34 | 78 Non-Rebreat  | NIMV (CPAP,          | Nasal Canula |
| NA |       | 97  | 26 | 77 Nasal Cannul | Nasal Canula or less |              |
| NA |       | 108 | 40 | 90 Nasal Cannul | Nasal Canula or less |              |
|    | 99.8  | 138 | 57 | 70 Ventilator   | NIMV (CPAP,          | Intubation   |
| NA |       | 99  | 36 | 74 Non-Rebreat  | NIMV (CPAP,          | NIMV (CPAP/  |
|    | 98.2  | 163 | 28 | 91 Nasal Cannul | Nasal Canula         | Nasal Canula |
| NA |       | 74  | 36 | 87 Nasal Cannul | Nasal Canula or less |              |

| Admission..N             | Admission..N | Was.NPPV..r | Was.the.pati | Reason.for.E    | Was.the.pati | Was.a.trache |
|--------------------------|--------------|-------------|--------------|-----------------|--------------|--------------|
| Intubation               |              | Yes         | Yes          |                 | No           | No           |
|                          |              | No          | No           |                 | No           | No           |
| NIMV (CPAP,              | NIMV (CPAP,  | Yes         | No           |                 | No           | No           |
| Nasal Canula or less     |              | No          | No           |                 | No           | No           |
| 'BiPAP, Hi Flow O2)      |              | Yes         | No           |                 | No           | No           |
| NIMV (CPAP,              | NIMV (CPAP,  | Yes         | No           |                 | No           | No           |
|                          |              | No          | No           |                 | No           | No           |
| NIMV (CPAP/BiPAP, Hi Flo |              | No          | Yes          |                 | No           | No           |
| NIMV (CPAP,              | NIMV (CPAP,  | Yes         | Yes          | Futility/Palli: | No           | No           |
| 'BiPAP, Hi Flow O2)      |              | Yes         | No           |                 | No           | No           |
| NIMV (CPAP,              | NIMV (CPAP,  | Yes         | No           |                 | No           | No           |
| Nasal Canula             | Nasal Canula | No          | No           |                 | No           | No           |
| Intubation               | Intubation   | Yes         | Yes          | Improvement     | Yes          | Yes          |
|                          |              | Yes         | No           |                 | No           | No           |
|                          |              | Yes         | Yes          |                 | No           | No           |
| Intubation               | Intubation   | Yes         | Yes          | Futility/Palli: | No           | No           |
|                          |              | Yes         | Yes          | Futility/Palli: | No           | No           |
| Intubation               | Intubation   | No          | Yes          | Futility/Palli: | No           | No           |
|                          |              | No          | No           |                 | No           | No           |
|                          | Intubation   | Yes         | Yes          | Futility/Palli: | No           | No           |
| Nasal Canula or less     |              | No          | No           |                 | No           | No           |
| Intubation               | Intubation   | Yes         | Yes          | Futility/Palli: | No           | No           |
|                          |              | No          | No           |                 | No           | No           |
| Nasal Canula             | Nasal Canula | No          | No           |                 | No           | No           |
| w O2)                    |              | No          | Yes          | Futility/Palli: | No           | No           |
| 'BiPAP, Hi Flow O2)      |              | No          | No           |                 | No           | No           |
| Intubation               | Intubation   | No          | Yes          | Futility/Palli: | No           | No           |
| Intubation               | Intubation   | Yes         | Yes          | Improvement     | Yes          | Yes          |
| w O2)                    |              | Yes         | No           |                 | No           | No           |
| NIMV (CPAP/BiPAP, Hi Flo |              | Yes         | No           |                 | No           | No           |
| Nasal Canula or less     |              | Yes         | No           |                 | No           | No           |
|                          |              | No          | Yes          | Futility/Palli: | No           | No           |
| or less                  |              | No          | No           |                 | No           | No           |
| Intubation               | Intubation   | No          | Yes          | Futility/Palli: | No           | No           |
| or less                  |              | No          | No           |                 | No           | No           |
| NIMV (CPAP/BiPAP, Hi Flo |              | No          | No           |                 | No           | No           |
| Intubation               |              | Yes         | Yes          | Futility/Palli: | No           | No           |
| or less                  |              | No          | No           |                 | No           | No           |
| Intubation               | Nasal Canula | Yes         | Yes          | Improvement     | Yes          | No           |
| NIMV (CPAP,              | NIMV (CPAP,  | No          | No           |                 | No           | No           |
| or less                  |              | No          | No           |                 | No           | No           |
| or less                  |              | No          | No           |                 | No           | No           |

|                                                 |     |     |                 |     |
|-------------------------------------------------|-----|-----|-----------------|-----|
| NIMV (CPAP, NIMV (CPAP, Yes or less             | No  | No  | No              | No  |
| Intubation                                      | No  | Yes | No              | No  |
| NIMV (CPAP, Intubation                          | Yes | Yes | Futility/Pallia | No  |
| NIMV (CPAP, Nasal Canula                        | No  | No  | No              | No  |
| NIMV (CPAP/BiPAP, Hi Flo w O2)                  | No  | No  | No              | No  |
| Nasal Canula or less                            | No  | No  | No              | No  |
| Nasal Canula or less                            | No  | No  | No              | No  |
| NIMV (CPAP, NIMV (CPAP, or less                 | No  | No  | No              | No  |
| or less                                         | No  | No  | No              | No  |
| Intubation                                      | No  | Yes | No              | No  |
| NIMV (CPAP, Nasal Canula                        | No  | No  | No              | No  |
| NIMV (CPAP, NIMV (CPAP, Yes /BiPAP, Hi Flow O2) | Yes | No  | No              | No  |
| Intubation                                      | Yes | Yes | No              | Yes |
| NIMV (CPAP/BiPAP, Hi Flo                        | Yes | No  | No              | No  |
|                                                 | Yes | Yes | Improvement     | Yes |
| NIMV (CPAP/BiPAP, Hi Flo                        | No  | No  | No              | No  |
| Nasal Canula or less                            | No  | No  | No              | No  |
| w O2)                                           | No  | No  | No              | No  |
| NIMV (CPAP, NIMV (CPAP, Yes                     | Yes | No  | No              | No  |
|                                                 | Yes | Yes | Futility/Pallia | No  |
| Intubation                                      | Yes | Yes | Futility/Pallia | No  |
| Intubation                                      | Yes | Yes | Futility/Pallia | No  |
| or less                                         | No  | No  | No              | No  |
| Intubation                                      | Yes | Yes | Improvement     | No  |
| Nasal Canula or less                            | No  | No  | No              | No  |
|                                                 | Yes | Yes | Futility/Pallia | No  |
| Intubation                                      | No  | Yes | Improvement     | No  |
|                                                 | No  | No  | No              | No  |
| Intubation                                      | No  | Yes | No              | No  |
| or less                                         | No  | No  | No              | No  |
| Intubation                                      | Yes | Yes | Improvement     | No  |
| NIMV (CPAP, NIMV (CPAP, Yes                     | Yes | Yes | No              | No  |
| Intubation                                      | Yes | Yes | Improvement     | No  |
| Nasal Canula                                    | No  | No  | No              | No  |
| Nasal Canula                                    | No  | No  | No              | No  |
|                                                 | Yes | Yes | Futility/Pallia | No  |
|                                                 | Yes | Yes | Futility/Pallia | No  |
| Intubation                                      | Yes | Yes | Improvement     | Yes |
| NIMV (CPAP, NIMV (CPAP, Yes                     | Yes | Yes | Futility/Pallia | No  |

|                             |                 |     |     |                 |    |     |
|-----------------------------|-----------------|-----|-----|-----------------|----|-----|
| Intubation                  | Intubation      | No  | Yes | Futility/Pallia | No | No  |
| 'BiPAP, Hi Flow O2)         |                 | Yes | Yes | Futility/Pallia | No | No  |
| Intubation                  | Intubation      | No  | Yes | Improvement     | No | Yes |
| or less                     |                 | No  | No  |                 | No | No  |
| NIMV (CPAP/BiPAP, Hi Flo    |                 | Yes | Yes | Futility/Pallia | No | No  |
| or less                     |                 | No  | Yes | Futility/Pallia | No | No  |
| Intubation                  |                 | Yes | No  |                 | No | No  |
| NIMV (CPAP, NIMV (CPAP, No  |                 | No  | Yes | Futility/Pallia | No | No  |
| Nasal Canula Nasal Canula   |                 | No  | No  |                 | No | No  |
| Intubation                  | NIMV (CPAP, Yes | Yes | No  | Improvement     | No | No  |
| Intubation                  |                 | Yes | Yes | Futility/Pallia | No | No  |
|                             |                 | Yes | Yes | Futility/Pallia | No | No  |
| NIMV (CPAP, NIMV (CPAP, No  |                 | No  | No  |                 | No | No  |
|                             |                 | No  | No  |                 | No | No  |
| Nasal Canula Nasal Canula   |                 | No  | No  |                 | No | No  |
| Intubation                  | Intubation      | Yes | Yes | Improvement     | No | Yes |
| Intubation                  | Intubation      | Yes | Yes | Futility/Pallia | No | No  |
| 'BiPAP, Hi Flow O2)         |                 | No  | No  |                 | No | No  |
|                             |                 | Yes | Yes | Futility/Pallia | No | No  |
| or less                     |                 | No  | No  |                 | No | No  |
| Intubation                  |                 | Yes | Yes | Futility/Pallia | No | No  |
| NIMV (CPAP/BiPAP, Hi Flo    |                 | No  | No  |                 | No | No  |
| Nasal Canula or less        |                 | No  | No  |                 | No | No  |
| NIMV (CPAP, NIMV (CPAP, Yes |                 | Yes | Yes | Futility/Pallia | No | No  |
| Intubation                  | Intubation      | Yes | Yes | Improvement     | No | Yes |
|                             |                 | Yes | Yes | Futility/Pallia | No | No  |
|                             |                 | Yes | Yes | Futility/Pallia | No | No  |
| Intubation                  | Intubation      | Yes | Yes | Futility/Pallia | No | No  |
| 'BiPAP, Hi Flow O2)         |                 | No  | No  |                 | No | No  |
| Nasal Canula Nasal Canula   |                 | No  | No  |                 | No | No  |
|                             |                 | No  | No  |                 | No | No  |
|                             |                 | No  | No  |                 | No | No  |
| Intubation                  | Intubation      | Yes | Yes | Futility/Pallia | No | Yes |
| 'BiPAP, Hi Flow O2)         |                 | No  | No  |                 | No | No  |
| Nasal Canula Nasal Canula   |                 | No  | No  |                 | No | No  |
|                             |                 | No  | No  |                 | No | No  |



| Did.the.pat | Was.hemodi         | Reason.for.s    | Was.plasma | Number.of.u | Was.the.pat | Was.the.pat |
|-------------|--------------------|-----------------|------------|-------------|-------------|-------------|
| Yes         | Due to COVID       | Futility/Pallia | Yes        | 1 unit      | No          | Yes         |
| No          |                    |                 | Yes        | 2 units     | No          | No          |
| No          |                    |                 | Yes        | 1 unit      | No          | No          |
| No          |                    |                 | Yes        | 2 units     | No          | No          |
| No          |                    |                 | Yes        | 1 unit      | No          | No          |
| No          |                    |                 | Yes        | 1 unit      | No          | No          |
| No          |                    |                 | Yes        | 2 units     | No          | No          |
| No          |                    |                 | Yes        | 1 unit      | No          | Yes         |
| No          |                    |                 | Yes        | 2 units     | No          | No          |
| No          |                    |                 | Yes        | 1 unit      | No          | No          |
| No          |                    |                 | Yes        | 1 unit      | No          | No          |
| No          |                    |                 | Yes        | 2 units     | No          | No          |
| Yes         | Due to COVID       | Improvement     | Yes        | 1 unit      | No          | Yes         |
| No          |                    |                 | No         |             |             |             |
| Yes         | Due to COVID       | Futility/Pallia | Yes        | 1 unit      | Yes         | Yes         |
| Yes         | Due to COVID       | Futility/Pallia | Yes        | 1 unit      | Yes         | Yes         |
| Yes         | Due to COVID       | Futility/Pallia | Yes        | 1 unit      | No          | Yes         |
| No          |                    |                 | Yes        | 2 units     | No          | Yes         |
| No          |                    |                 | Yes        | 2 units     | No          | No          |
| Yes         | Due to COVID       | Futility/Pallia | No         |             |             |             |
| No          |                    |                 | Yes        | 2 units     | No          | No          |
| Yes         | Due to COVID       | Futility/Pallia | Yes        | 1 unit      | No          | Yes         |
| Yes         | Previous Condition |                 | No         |             |             |             |
| Yes         | Previous Condition |                 | Yes        | 2 units     | Yes         | No          |
| No          |                    |                 | Yes        | 1 unit      | No          | No          |
| No          |                    |                 | Yes        | 1 unit      | No          | No          |
| Yes         | Due to COVID       | Futility/Pallia | Yes        | 1 unit      | No          | No          |
| No          |                    |                 | Yes        | 1 unit      | No          | Yes         |
| No          |                    |                 | Yes        | 1 unit      | No          | No          |
| No          |                    |                 | Yes        | 2 units     | No          | No          |
| No          |                    |                 | Yes        | 1 unit      | No          | No          |
| No          |                    |                 | Yes        | 1 unit      | No          | No          |
| No          |                    |                 | Yes        | 2 units     | No          | No          |
| Yes         | Due to COVID       | Futility/Pallia | Yes        | 1 unit      | Yes         | Yes         |
| No          |                    |                 | Yes        | 2 units     | No          | No          |
| No          |                    |                 | Yes        | 1 unit      | No          | No          |
| No          |                    |                 | Yes        | 1 unit      | No          | Yes         |
| No          |                    |                 | Yes        | 2 units     | No          | No          |
| No          |                    |                 | Yes        | 1 unit      | No          | Yes         |
| No          |                    |                 | Yes        | 2 units     | No          | No          |
| Yes         | Previous Condition |                 | Yes        | 1 unit      | Yes         | No          |
| No          |                    |                 | Yes        | 2 units     | No          | No          |

|     |                              |     |         |     |     |
|-----|------------------------------|-----|---------|-----|-----|
| No  |                              | Yes | 1 unit  | No  | No  |
| No  |                              | Yes | 1 unit  | No  | No  |
| Yes | Due to COVID                 | Yes | 1 unit  | Yes | Yes |
| Yes | Due to COVID Futility/Pallia | Yes | 1 unit  | No  | No  |
| No  |                              | Yes | 1 unit  | No  | No  |
| No  |                              | Yes | 1 unit  | No  | No  |
| No  |                              | Yes | 1 unit  | No  | No  |
| No  |                              | Yes | 2 units | No  | No  |
| No  |                              | Yes | 1 unit  | No  | No  |
| No  |                              | Yes | 1 unit  | No  | Yes |
| No  |                              | Yes | 1 unit  | No  | No  |
| No  |                              | Yes | 1 unit  | No  | No  |
| No  |                              | Yes | 2 units | No  | No  |
| No  |                              | Yes | 1 unit  | No  | Yes |
| No  |                              | Yes | 1 unit  | No  | No  |
| No  |                              | Yes | 1 unit  | No  | No  |
| No  |                              | Yes | 2 units | No  | No  |
| No  |                              | Yes | 1 unit  | No  | Yes |
| No  | Futility/Pallia              | Yes | 1 unit  | No  | No  |
| No  |                              | Yes | 1 unit  | No  | No  |
| No  |                              | Yes | 1 unit  | No  | No  |
| No  |                              | Yes | 1 unit  | No  | No  |
| No  |                              | Yes | 1 unit  | No  | No  |
| No  |                              | Yes | 1 unit  | No  | No  |
| Yes | Due to COVID Futility/Pallia | Yes | 2 units | No  | Yes |
| Yes | Due to COVID Futility/Pallia | Yes | 2 units | No  | No  |
| No  |                              | Yes | 2 units | No  | No  |
| Yes | Due to COVID Improvemen      | Yes | 1 unit  | Yes | Yes |
| No  |                              | Yes | 2 units | No  | No  |
| Yes | Due to COVID Futility/Pallia | Yes | 1 unit  | Yes | Yes |
| No  |                              | Yes | 1 unit  | No  | Yes |
| No  |                              | Yes | 2 units | No  | No  |
| Yes | Due to COVID                 | Yes |         | No  | No  |
| No  |                              | Yes | 1 unit  | No  | No  |
| No  |                              | Yes | 1 unit  | No  | No  |
| No  |                              | Yes | 1 unit  | No  | No  |
| No  |                              | Yes | 1 unit  | No  | Yes |
| No  |                              | Yes | 1 unit  | No  | No  |
| No  |                              | Yes | 1 unit  | No  | No  |
| No  |                              | Yes | 1 unit  | No  | Yes |
| No  |                              | Yes | 1 unit  | No  | Yes |
| Yes | Due to COVID Futility/Pallia | Yes | 1 unit  | No  | Yes |
| Yes | Due to COVID Futility/Pallia | Yes | 1 unit  | No  | Yes |

|     |                              |     |         |     |     |
|-----|------------------------------|-----|---------|-----|-----|
| No  |                              | Yes | 1 unit  | No  | Yes |
| No  |                              | Yes | 1 unit  | No  | Yes |
| No  |                              | Yes | 1 unit  | No  | Yes |
| No  |                              | Yes | 2 units | No  | No  |
| Yes | Due to COVID Futility/Pallia | Yes | 1 unit  | No  | No  |
| No  |                              | Yes | 1 unit  | No  | Yes |
| No  |                              | Yes | 1 unit  | No  | No  |
| No  |                              | Yes | 1 unit  | No  | Yes |
| No  |                              | Yes | 1 unit  | No  | No  |
| No  |                              | Yes | 1 unit  | No  | No  |
| No  |                              | Yes | 1 unit  | No  | Yes |
| No  |                              | Yes | 1 unit  | No  | Yes |
| Yes | Due to COVID Futility/Pallia | Yes | 1 unit  | Yes | Yes |
| No  |                              | Yes | 1 unit  | No  | No  |
| No  |                              | No  |         |     |     |
| No  |                              | Yes | 2 units | No  | No  |
| No  |                              | Yes | 1 unit  | No  | Yes |
| Yes | Due to COVID Futility/Pallia | Yes | 1 unit  | No  | Yes |
| No  |                              | Yes | 1 unit  | No  | No  |
| No  |                              | Yes | 1 unit  | No  |     |
| No  |                              | Yes | 1 unit  | No  | No  |
| Yes | Due to COVID Futility/Pallia | Yes | 1 unit  | No  | Yes |
| No  |                              | Yes | 2 units | No  | No  |
| No  |                              | Yes | 1 unit  | No  | No  |
| No  |                              | Yes | 2 units | No  | No  |
| Yes | Due to COVID Improvement     | Yes | 1 unit  | Yes | Yes |
| Yes | Due to COVID Futility/Pallia | Yes | 1 unit  | No  | No  |
| No  |                              | Yes | 1 unit  | No  | Yes |
| Yes | Due to COVID Futility/Pallia | Yes | 1 unit  | No  | Yes |
| No  |                              | Yes | 2 units | No  | No  |
| Yes | Due to COVID Improvement     | Yes | 1 unit  | No  | No  |
| No  |                              | Yes | 1 unit  | No  | No  |
| No  |                              | Yes | 1 unit  | No  | No  |
| Yes | Due to COVID Futility/Pallia | Yes | 1 unit  | No  | Yes |
| No  |                              | Yes | 1 unit  | No  | No  |
| Yes | Due to COVID Improvement     | Yes | 1 unit  | Yes | No  |
| No  |                              | Yes | 1 unit  | No  | No  |

Was.the.pati COVID..Was. COVID..Was. COVID..Was. Was.azithror Was.Nitric.O Was.Anticoa

|     |     |     |    |     |    |     |
|-----|-----|-----|----|-----|----|-----|
| No  | No  | No  | No | Yes | No | Yes |
| No  | No  | No  | No | No  | No | No  |
| Yes | No  | No  | No | Yes | No | Yes |
| No  | Yes | Yes | No | No  | No | No  |
| No  | Yes | No  | No | Yes | No | No  |
| No  | No  | No  | No | No  | No | Yes |
| No  | No  | No  | No | No  | No | No  |
| No  | Yes | No  | No | Yes | No | Yes |
| No  | No  | No  | No | Yes | No | Yes |
| No  | No  | No  | No | No  | No | Yes |
| No  | No  | No  | No | Yes | No | Yes |
| No  | No  | Yes | No | No  | No | No  |
| No  | Yes | No  | No | Yes | No | Yes |
| Yes | No  | No  | No |     | No |     |
| Yes | Yes | No  | No | No  | No | No  |
| Yes | Yes | No  | No | No  | No | Yes |
| No  | Yes | No  | No | Yes | No | No  |
| Yes | No  | Yes | No | Yes | No | Yes |
| Yes | No  | No  | No | No  | No | No  |
| Yes | No  | No  | No | No  | No | Yes |
| Yes | No  | Yes | No | No  | No | No  |
| Yes | Yes | No  | No | No  | No | Yes |
| No  | No  | No  | No | No  | No | No  |
| No  | No  | No  | No | No  | No | No  |
| No  | No  | No  | No | No  | No | No  |
| No  | No  | No  | No | Yes | No | Yes |
| Yes | Yes | No  | No | Yes | No | Yes |
| Yes | No  | No  | No | No  | No | Yes |
| Yes | No  | No  | No | Yes | No | No  |
| No  | No  | Yes | No | No  | No | Yes |
| No  | Yes | No  | No | No  | No | Yes |
| Yes | No  | No  | No | No  | No | Yes |
| No  | No  | No  | No | No  | No | No  |
| Yes | Yes | No  | No | Yes | No | Yes |
| Yes | No  | No  | No | No  | No | No  |
| Yes | Yes | No  | No | No  | No | No  |
| Yes | Yes | No  | No | Yes | No | Yes |
| No  | No  | No  | No | Yes | No | Yes |
| Yes | Yes | No  | No | Yes | No | Yes |
| Yes | No  | Yes | No | No  | No | Yes |
| No  | No  | No  | No | Yes | No | No  |
| Yes | No  | No  | No | No  | No | No  |

|     |     |    |    |     |    |     |
|-----|-----|----|----|-----|----|-----|
| Yes | No  | No | No | No  | No | Yes |
| Yes | No  | No | No | No  | No | Yes |
| Yes | Yes | No | No | Yes | No | Yes |
| Yes | No  | No | No | No  | No | Yes |
| No  | Yes | No | No | No  | No | Yes |
| No  | Yes | No | No | Yes | No | Yes |
| No  | No  | No | No |     | No |     |
| Yes | Yes | No | No | Yes | No | Yes |
| No  | No  | No | No | Yes | No | Yes |
| No  | No  | No | No | Yes | No | Yes |
| No  | No  | No | No | Yes | No | No  |
| Yes | Yes | No | No | No  | No | No  |
| No  | Yes | No | No | Yes | No | No  |
| No  | Yes | No | No | No  | No | No  |
| Yes | Yes | No | No | Yes | No | Yes |
| No  | No  | No | No | No  | No | No  |
| No  | No  | No | No | Yes | No | Yes |
| Yes | Yes | No | No | Yes | No | Yes |
| No  | Yes | No | No | Yes | No | Yes |
| No  | No  | No | No | Yes | No | Yes |
| No  | Yes | No | No | Yes | No | No  |
| No  | No  | No | No | No  | No | No  |
| Yes | No  | No | No | Yes | No | Yes |
| Yes | Yes | No | No | Yes | No | Yes |
| Yes | No  | No | No | Yes | No | Yes |
| Yes | No  | No | No | No  | No | Yes |
| No  | Yes | No | No | Yes | No | Yes |
| Yes | No  | No | No | No  | No | Yes |
| Yes | Yes | No | No | Yes | No | Yes |
| Yes | Yes | No | No | Yes | No | Yes |
| No  | No  | No | No | No  | No | Yes |
| No  | No  | No | No | No  | No | No  |
| Yes | Yes | No | No | Yes | No | Yes |
| Yes | Yes | No | No | Yes | No | Yes |
| No  | No  | No | No | No  | No | Yes |
| No  | No  | No | No | No  | No | No  |
| Yes | Yes | No | No | Yes | No | Yes |
| Yes | Yes | No | No | Yes | No | Yes |
| No  | No  | No | No | No  | No | Yes |
| Yes | No  | No | No | No  | No | No  |

|     |     |    |    |     |    |     |
|-----|-----|----|----|-----|----|-----|
| Yes | No  | No | No | No  | No | Yes |
| Yes | Yes | No | No | Yes | No | Yes |
| No  | Yes | No | No | Yes | No | Yes |
| No  | Yes | No | No | No  | No | No  |
| Yes | No  | No | No | No  | No | Yes |
| Yes | Yes | No | No | Yes | No | Yes |
| No  | No  | No | No | No  | No | Yes |
| Yes | Yes | No | No | Yes | No | Yes |
| No  | No  | No | No | Yes | No | Yes |
| No  | No  | No | No | No  | No | Yes |
| No  | Yes | No | No | Yes | No | Yes |
| No  | Yes | No | No | Yes | No | Yes |
| No  | Yes | No | No | Yes | No | Yes |
| No  | No  | No | No | Yes | No | Yes |
| No  | No  | No | No | No  | No | No  |
| No  | No  | No | No | No  | No | No  |
| Yes | Yes | No | No | Yes | No | Yes |
| No  | Yes | No | No | No  | No | Yes |
| No  | Yes | No | No | Yes | No | Yes |
| Yes | Yes | No | No | Yes | No | Yes |
| No  | No  | No | No | No  | No | Yes |
| Yes | Yes | No | No | Yes | No | Yes |
| No  | No  | No | No | No  | No | Yes |
| No  | No  | No | No | Yes | No | Yes |
| Yes | No  | No | No | No  | No | Yes |
| No  | Yes | No | No | Yes | No | Yes |
| No  | No  | No | No | No  | No | Yes |
| No  | Yes | No | No | No  | No | Yes |
| No  | Yes | No | No | Yes | No | Yes |
| No  | Yes | No | No | No  | No | Yes |
| No  | No  | No | No | No  | No | No  |
| No  | No  | No | No | No  | No | No  |

| Was.Anticoa | Was.Steroid | Was.patient | Was.Value.o Admission..F | Highest.D.Dir | Lowest.Value |
|-------------|-------------|-------------|--------------------------|---------------|--------------|
| No          | No          |             | Yes                      | 4973          | 3255 1650    |
| No          | No          |             | No                       | 1202          | 1202 NA      |
| No          | Yes         | No          | Yes                      | 30811         | 3717 2128    |
| No          | Yes         | No          | No                       | 1695          | 562 1003     |
| No          | No          |             | Yes                      | 128000        | 105900 26478 |
| No          | Yes         | No          | Yes                      | 5716          | 2208 871     |
| No          | No          |             | No                       | 984           | 984 751      |
| No          | No          |             | Yes                      | 21727         | 21727 3896   |
| No          | Yes         | No          | Yes                      | 9280          | 631 597      |
| No          | No          |             | Yes                      | 2359          | 2359 1327    |
| No          | Yes         | No          | No                       | 1700          | 1421 1122    |
| No          | No          |             | Yes                      | 15376         | 1404 2478    |
| No          | No          |             | Yes                      | 18337         | 1764 1717    |
|             |             |             | UNK                      | NA            | NA NA        |
| No          | No          |             | Yes                      | 23462         | 17916 23462  |
| No          | No          |             | Yes                      | 87098         | 87098 3252   |
| No          | Yes         | No          | Yes                      | 58843         | 16113 17862  |
| No          | No          |             | Yes                      | 26116         | 26116 NA     |
| No          | No          |             | Yes                      | 2010          | 1689 2010    |
| No          | No          |             | Yes                      | 11624         | NA 2417      |
| No          | No          |             | No                       | 1125          | 1020 1125    |
| No          | Yes         | No          | Yes                      | 15288         | 5703 5205    |
|             |             |             |                          | NA            | NA NA        |
| No          | No          |             | Yes                      | 5031          | NA 5031      |
| Yes         | Yes         | No          | Yes                      | 2650          | 2650 1693    |
| No          | No          |             | Yes                      | 27620         | 460 27620    |
| No          | No          |             | Yes                      | 128000        | 86462 5269   |
| No          | Yes         | No          | Yes                      | 4793          | 4793 NA      |
| No          | No          |             | Yes                      | 19174         | 19174 NA     |
| Yes         | No          |             | No                       | 1825          | 326 1825     |
| No          | No          |             | No                       | 1882          | 1283 1300    |
| No          | Yes         | No          | No                       | 682           | 682 NA       |
| No          | No          |             | No                       | 616           | 585 616      |
| UNK         | Yes         | UNK         | Yes                      | 33289         | 33289 13202  |
| No          | No          |             | No                       | 792           | 792 NA       |
| No          | No          |             | Yes                      | 66288         | NA NA        |
| No          | No          |             | Yes                      | 7037          | 7037 4128    |
| No          | No          |             | Yes                      | 14152         | 14152 NA     |
| No          | Yes         | No          | Yes                      | 32758         | 32758 685    |
| No          | No          |             | Yes                      | 2101          | 1536 1528    |
| No          | No          |             | No                       | 337           | NA 337       |
| No          | No          |             | No                       | 709           | 636 595      |

|     |     |    |     |         |          |       |
|-----|-----|----|-----|---------|----------|-------|
| No  | No  |    | Yes | 3882    | 1259     | 850   |
| No  | Yes | No | No  | 756     | 756 NA   |       |
| No  | Yes | No | Yes | 62290   | 14951 NA |       |
| No  | Yes | No | Yes | 57869   | 57869    | 5860  |
| Yes | No  |    | No  | 1019    | 1019     | 719   |
| Yes | No  |    | Yes | 19598   | 550      | 4184  |
|     |     |    | UNK | NA      | NA       | NA    |
| No  | No  |    | Yes | 20405   | 7549     | 4400  |
| No  | No  |    | Yes | 5161    | 5161     | 1435  |
| No  | No  |    | Yes | 4157    | 1767     | 1399  |
| No  | No  |    | No  | 623     | 623 NA   |       |
| No  | No  |    | Yes | 5009 NA |          | 3585  |
| No  | No  |    | Yes | 28206   | 20781    | 17255 |
| No  | Yes | No | Yes | 5457    | 480      | 1085  |
| No  | Yes | No | Yes | 6365    | 3394     | 292   |
| No  | Yes | No | Yes | 2161    | 1383     | 2161  |
| No  | Yes | No | Yes | 5535    | 5535     | 1950  |
| No  | Yes | No | Yes | 13286   | 13286    | 434   |
| No  | Yes | No | Yes | 6440    | 6440 NA  |       |
| No  | Yes | No | Yes | 92089   | 92089    | 12966 |
| No  | Yes | No | Yes | 28775   | 28775    | 4708  |
| No  | No  |    | UNK | NA      | NA       | NA    |
| No  | Yes | No | Yes | 15896   | 5229     | 2126  |
| UNK | No  |    | Yes | 73262   | 73262 NA |       |
| No  | No  |    | Yes | 14389   | 990      | 5618  |
| UNK | No  |    | Yes | 20730   | 20730    | 4554  |
| No  | No  |    | No  | 240     | 240 NA   |       |
| No  | No  |    | Yes | 74072   | 74072    | 9212  |
| No  | No  |    | No  | 1649    | 1649     | 1145  |
| UNK | No  |    | Yes | 4409    | 1808     | 1822  |
| UNK | No  |    | Yes | 5326    | 5326 NA  |       |
| UNK | No  |    | No  | 801     | 553      | 676   |
|     |     |    | Yes | 68334   | 671      | 1793  |
| No  | Yes | No | No  | 1403    | 1330     | 1214  |
| No  | Yes | No | Yes | 5584    | 5584     | 1235  |
| No  | No  |    | Yes | 33656   | 33656    | 1427  |
| No  | No  |    | Yes | 28900   | 25406    | 7074  |
| No  | No  |    | Yes | 80386   | 80386    | 5940  |
| No  | No  |    | No  | 872     | 872 NA   |       |
| No  | Yes | No | Yes | 30736   | 30736 NA |       |
| No  | Yes | No | Yes | 87837   | 87837 NA |       |
| No  | Yes | No | Yes | 11694   | 11694    | 7520  |
| Yes | Yes | No | Yes | 6523    | 811      | 1257  |



|     |     |    |     |    |        |        |       |
|-----|-----|----|-----|----|--------|--------|-------|
| No  | No  |    | Yes |    | 4464   | 2750   | 1713  |
| No  | No  |    | Yes |    | 118892 | 118892 | 1860  |
| No  | No  |    | No  |    | 1852   | 1852   | NA    |
| No  | No  |    | Yes |    | 2121   | 2121   | NA    |
| No  | No  |    | Yes |    | 56631  | 56631  | 20381 |
| No  | No  |    | Yes |    | 69311  | 69311  | 32204 |
| No  | No  |    | No  |    | 741    | NA     | 741   |
| No  | No  |    | Yes |    | 16334  | 5998   | 16334 |
| No  | No  |    | Yes |    | 16062  | 1310   | 826   |
| No  | No  |    | Yes |    | 54576  | 54576  | NA    |
| No  | No  |    | Yes |    | 14240  | 5118   | 6419  |
| No  | No  |    | Yes |    | 106000 | 106000 | NA    |
| UNK | No  |    | Yes |    | 4647   | 4647   | NA    |
| No  | No  |    | No  |    | 1775   | 1775   | 792   |
|     |     |    | UNK | NA |        | NA     | NA    |
| UNK | No  |    | Yes |    | 2623   | 734    | 2181  |
| No  | No  |    | Yes |    | 13181  | 13181  | 1928  |
| No  | No  |    | Yes |    | 12770  | NA     | 2019  |
| No  | No  |    | No  |    | 1992   | NA     | 1992  |
| No  | Yes | No | Yes |    | 13426  | 13426  | 498   |
| No  | No  |    | No  |    | 804    | 804    | 537   |
| No  | Yes | No | Yes |    | 73496  | 73496  | 2535  |
| Yes | No  |    | Yes |    | 95068  | NA     | 1461  |
| No  | Yes | No | UNK | NA |        | NA     | NA    |
| No  | Yes | No | Yes |    | 2445   | 2233   | 602   |
| No  | No  |    | Yes |    | 45266  | 45266  | 4135  |
| No  | Yes | No | Yes |    | 19556  | 1092   | 6170  |
| No  | Yes | No | Yes |    | 6399   | 6399   | NA    |
| No  | Yes | No | Yes |    | 128000 | 128000 | 17165 |
| No  | Yes | No | No  |    | 623    | 623    | 378   |
| No  | No  |    | No  | NA |        | NA     | NA    |
| No  | No  |    | Yes |    | 57236  | 57236  | 22921 |
| No  | No  |    | UNK | NA |        | NA     | NA    |
| No  | Yes | No | Yes |    | 21891  | 16061  | 5007  |
| No  | No  |    | Yes |    | 6253   | 5074   | 1693  |
| Yes | No  |    | Yes |    | 5984   | 5984   | 1442  |
| No  | No  |    | No  |    | 872    | 872    | NA    |

|    | Highest.Valu | Platelets.Day | Lowest.Valu | Lowest.Valu | Admission..L | Admission..F | Admission..F |
|----|--------------|---------------|-------------|-------------|--------------|--------------|--------------|
|    | 4973         | NA            | 150         | 158         | 388          | 619          | 1650         |
| NA | NA           | NA            | 283         | 283         | 395          | 461          | 1650         |
|    | 30811        | 486           | 218         | 432         | 400          | 484          | 1650         |
|    | 1695         | 288           | 288         | 288         | 337          | 543          | 809          |
|    | 128000       | 377           | 145         | 145         | 212          | 311          | 1650         |
|    | 5716         | 198           | 104         | 139         | 122          | 281          | 1650         |
|    | 930          | 324           | 305         | 305         | 437          | 457          | NA           |
|    | 6567         | 381           | 146         | 249         | 146          | 356          | 208          |
|    | 9280         | 132           | 132         | 132         | 148          | 399          | 1650         |
|    | 1327         | 179           | 118         | 118         | 199          | 258          | NA           |
|    | 1700         | 326           | 136         | 233         | 136          | 313          | 838          |
|    | 15376        | 135           | 135         | 135         | 194          | 365          | 1181         |
|    | 18337        | 591           | 38          | 415         | 303          | 593          | 1462         |
| NA | NA           | NA            | NA          | NA          | NA           | NA           | NA           |
|    | 23462        | 240           | 168         | 181         | 239          | 239          | 1650         |
|    | 24592        | 399           | 10          | 225         | 10           | 424          | 1556         |
|    | 32496        | 243           | 135         | 135         | 285          | 340          | 1650         |
| NA |              | 295           | 61          | 250         | 61           | 427          | 1650         |
|    | 2010         | 405           | 324         | NA          | 482          | 482          | 1650         |
|    | 11624        | NA            | NA          | NA          | 383          | 523          | 1650         |
|    | 1125         | 165           | 127         | 165         | 127          | 159          | 1650         |
|    | 15288        | 262           | 149         | 239         | 177          | 268          | 1650         |
| NA | NA           | NA            | NA          | NA          | NA           | NA           | NA           |
|    | 5031         | 201           | 116         | 116         | 168          | 300          | 1650         |
| NA |              | 163           | 163         | 163         | NA           | NA           | 1069         |
|    | 27620        | 364           | 166         | 331         | 304          | 331          | 1650         |
|    | 128000       | 287           | 83          | 287         | 83           | 269          | 1650         |
| NA |              | 230           | 205         | 230         | 250          | 409          | 894          |
| NA |              | 266           | 173         | 266         | 224          | 224          | 878          |
|    | 1825         | 238           | 164         | 187         | 296          | 448          | 754          |
|    | 1882         | 245           | 239         | 245         | 287          | 490          | 352          |
| NA |              | 262           | 226         | 257         | 336          | 611          | 173          |
|    | 616          | 393           | 365         | 365         | 427          | 427          | 568          |
|    | 14714        | 154           | 78          | 116         | 78           | 249          | 1532         |
| NA | NA           |               | 202         | 217         | 202          | 202          | 627          |
|    | 66288        | 296           | 142         | 142         | 172          | 374          | 1650         |
|    | 4128         | 279           | 200         | 200         | 236          | 379          | 1372         |
| NA |              | 309           | 208         | 208         | 307          | 337          | 519          |
|    | 2299         | 507           | 281         | 281         | 492          | 602          | 1650         |
|    | 2101         | 90            | 90          | 90          | 91           | 139          | 1650         |
| NA | NA           |               | 130         | 130         | 243          | 243          | 1650         |
|    | 709          | 164           | 145         | 151         | 145          | 248          | 1650         |

|    |          |     |     |        |     |     |      |
|----|----------|-----|-----|--------|-----|-----|------|
|    | 2428     | 333 | 92  | 288    | 170 | 597 | 223  |
| NA |          | 406 | 257 | 257 NA | NA  |     | 471  |
| NA |          | 243 | 116 | 204    | 154 | 324 | 1650 |
|    | 54819    | 319 | 91  | 314    | 91  | 473 | 1650 |
|    | 874      | 208 | 208 | 208    | 226 | 530 | 1650 |
|    | 19598    | 237 | 138 | 138    | 296 | 362 | 455  |
| NA | NA       |     | 210 | 210 NA | NA  |     | 984  |
|    | 4670     | 415 | 274 | 274    | 414 | 480 | 1650 |
|    | 3271     | 420 | 409 | 420    | 409 | 486 | 376  |
|    | 4157     | 370 | 272 | 272    | 390 | 533 | 842  |
| NA | NA       |     | 114 | 114    | 308 | 445 | 812  |
|    | 5009     | 318 | 262 | 318    | 262 | 341 | 109  |
|    | 28206    | 98  | 98  | 98     | 121 | 291 | 1650 |
|    | 5457     | 487 | 343 | 343    | 518 | 647 | 969  |
|    | 1271     | 480 | 224 | 227    | 297 | 490 | 1650 |
|    | 4957     | 215 | 204 | 215    | 204 | 316 | 825  |
|    | 4019     | 460 | 142 | 460    | 142 | 465 | 524  |
|    | 1390     | 421 | 168 | 404    | 208 | 416 | 1650 |
| NA |          | 73  | 61  | 61     | 77  | 121 | 746  |
|    | 20630    | 166 | 120 | 154    | 120 | 141 | 299  |
|    | 19524    | 193 | 141 | 193    | 186 | 246 | 1650 |
| NA | NA       |     | 297 | 297    | 315 | 315 | 1425 |
|    | 15896    | 292 | 237 | 292    | 237 | 428 | 1650 |
| NA |          | 181 | 181 | 252    | 202 | 273 | 1650 |
|    | 14389    | 536 | 263 | 263    | 459 | 646 | 1650 |
|    | 13904    | 410 | 233 | 325    | 233 | 528 | 1650 |
| NA |          | 200 | 191 | 200    | 191 | 193 | 134  |
|    | 25603    | 593 | 379 | 116    | 220 | 689 | 1650 |
|    | 1537     | 240 | 212 | 212    | 234 | 343 | 1650 |
|    | 4409     | 328 | 215 | 341    | 331 | 391 | 1650 |
| NA |          | 385 | 217 | 260    | 339 | 534 | 1650 |
|    | 801      | 271 | 208 | 208    | 309 | 354 | 1650 |
|    | 68334 NA |     | 134 | 147    | 201 | 332 | 585  |
|    | 1403 NA  |     | 136 | 313    | 482 | 482 | 724  |
|    | 3587     | 241 | 198 | 241    | 198 | 348 | 1650 |
|    | 17258    | 202 | 81  | 202    | 141 | 214 | 1650 |
|    | 7074     | 384 | 214 | 348    | 244 | 446 | 1650 |
|    | 5940     | 306 | 223 | 233    | 328 | 453 | 319  |
| NA |          | 299 | 279 | 279    | 364 | 364 | 889  |
| NA |          | 295 | 142 | 142    | 340 | 377 | 436  |
| NA |          | 300 | 250 | 299    | 269 | 416 | 1650 |
|    | 7520     | 396 | 121 | 393    | 130 | 453 | 1650 |
|    | 6523     | 230 | 129 | 129    | 247 | 471 | 1650 |

|    |       |     |     |     |     |     |        |
|----|-------|-----|-----|-----|-----|-----|--------|
|    | 4464  | 563 | 170 | 560 | 170 | 377 | 1650   |
|    | 1964  | 498 | 248 | 248 | 342 | 711 | 1650   |
| NA |       | 293 | 217 | 291 | 217 | 412 | 698    |
| NA |       | 189 | 167 | 197 | 204 | 204 | 1636   |
|    | 56353 | 156 | 92  | 124 | 92  | 379 | 1650   |
|    | 32204 | 223 | 178 | 178 | NA  | NA  | 1135   |
|    | 741   | NA  | 149 | 149 | 209 | 209 | 660    |
|    | 16334 | 223 | 166 | 166 | 218 | 350 | 1650   |
|    | 3352  | 429 | 265 | 427 | 265 | 388 | 610    |
| NA |       | 271 | 183 | 247 | 183 | 251 | 1309   |
|    | 14240 | 219 | 146 | 150 | 146 | 369 | 1650   |
| NA |       | 244 | 167 | 217 | 167 | 400 | 1650   |
| NA |       | 226 | 217 | 217 | 239 | 285 | 1457   |
|    | 1640  | 112 | 98  | 98  | 112 | 268 | 725    |
| NA | NA    | NA  | NA  | NA  | NA  | NA  |        |
|    | 2623  | 256 | 246 | 246 | 254 | 593 | 1650   |
|    | 2084  | 339 | 163 | 163 | 45  | 469 | 1650   |
|    | 2103  | 315 | 143 | 315 | 391 | 487 | 1382   |
|    | 1992  | NA  | 128 | 259 | 128 | 188 | 1650   |
| NA |       | 384 | 105 | 105 | 138 | 390 | 1650   |
| NA |       | 295 | 272 | 272 | 375 | 395 | 870    |
|    | 2535  | 165 | 106 | 106 | 149 | 188 | 1650   |
|    | 95068 | 210 | 64  | 164 | 64  | 198 | 1650   |
| NA | NA    |     | 335 | 386 | 335 | 422 | 409    |
|    | 1450  | 344 | 215 | 307 | 320 | 390 | 1103   |
|    | 15730 | 344 | 131 | 131 | 330 | 398 | 1650   |
|    | 19556 | 142 | 77  | 77  | 122 | 431 | 878    |
| NA |       | 255 | 154 | 154 | NA  | NA  | 1650   |
|    | 17886 | 70  | 48  | 48  | 89  | 290 | 1650   |
|    | 582   | 425 | 165 | 165 | 333 | 381 | 1236   |
| NA |       | 337 | 273 | 283 | 283 | 347 | 804    |
|    | 22921 | 354 | 334 | 340 | 334 | 334 | 399    |
| NA |       | 222 | 212 | 212 | NA  | NA  | 1650   |
|    | 21891 | 458 | 213 | 213 | 174 | 486 | 9190.8 |
|    | 1693  | 153 | 108 | 108 | 169 | 195 | 1650   |
|    | 1522  | 182 | 98  | 172 | 98  | 197 | 874    |
| NA |       | 299 | 279 | 279 | 364 | 364 | 889    |

|    | Highest.Valu | Admission..F | Admission...I | Highest.Valu | Admission..F | Admission...I | Highest.Valu |       |
|----|--------------|--------------|---------------|--------------|--------------|---------------|--------------|-------|
|    | 740          | 1650         | 0.01          | 0.01         | NA           |               | 379.3        | 292.9 |
|    | 1650         | 1650         | 0.01          | NA           | NA           |               | 138.8        | 138.8 |
|    | 1391         | 1650         | 0.02          | 0.02         | NA           |               | 288          | 257   |
|    | 506          | 809          | 0.05          | 0.05         | NA           |               | 155          | 155   |
|    | 1650         | 1650         | 0.66          | 0.16         | 0.66         |               | 132          | 132   |
|    | 1650         | 1650         | 0.09          | 0.09         | NA           |               | 421          | 421   |
| NA | NA           | NA           | 0.01          | 0.01         | NA           |               | 168          | 168   |
|    | 208          | 204          | 0.01          | 0.01         | NA           |               | 182.7        | 179.5 |
|    | 1650         | 1650         | 0.72          | NA           |              | 0.07          | 196          | NA    |
| NA | NA           | NA           | 0.07          | 0.07         | NA           |               | 154.9        | 154.9 |
|    | 838          | 649          | 0.19          | 0.19         | 0.05         |               | 129.1        | 129.1 |
|    | 1181         | 1138         | 0.02          | 0.02         | NA           |               | 238          | 94    |
|    | 1060         | 1462         | 2.02          | 0.01         | 2.02         |               | 301          | 190.4 |
| NA | NA           | NA           | NA            | NA           | NA           | NA            | NA           | NA    |
|    | 1650         | 1650         | 1.62          | 1.62         | NA           | NA            | NA           | NA    |
|    | 568          | 1556         | 0.29          | 0.12         | 0.29         |               | 295          | NA    |
|    | 1650         | 1650         | 0.63          | 0.33         | 0.27         |               | 361          | 254   |
|    | 1650         | 1650         | 0.01          | NA           | 0.01         |               | 465          | 152   |
|    | 1400         | 1174         | 0.01          | 0.01         | 0.01         |               | 244.3        | 204.4 |
| NA |              | 1650         | 0.47          | NA           |              | 0.12          | 392.8        | NA    |
|    | 1650         | 1501         | 0.01          | 0.01         | NA           |               | 7.6          | 1.4   |
| NA |              | 1650         | 0.01          | NA           | NA           |               | 154.4        | NA    |
| NA | NA           | NA           | NA            | NA           | NA           | NA            | NA           | NA    |
|    | 1650         | 1650         | 4.77          | NA           | NA           | NA            | NA           | NA    |
|    | 1069         | NA           | 0.3           | 0.3          | NA           |               | 379.4        | 379.4 |
| NA |              | 1650         | 31.37         | NA           |              | 31.37         | 434.6        | NA    |
|    | 1650         | 1650         | 0.01          | 0.01         | NA           |               | 382.3        | 299.6 |
|    | 894          | 458          | 0.02          | NA           | NA           |               | 187.1        | 184   |
|    | 878          | 731          | 0.07          | NA           | NA           |               | 231.6        | 153.4 |
|    | 416          | 754          | 0.04          | NA           | NA           |               | 275          | 252   |
| NA |              | 352          | 0.08          | 0.08         | NA           |               | 89.3         | NA    |
|    | 173          | NA           | 0.01          | 0.01         | NA           |               | 123.9        | 123.9 |
|    | 568          | 551          | 0.01          | 0.01         | NA           |               | 183.5        | 168.1 |
| NA |              | 1532         | 8.47          | 8.47         | 0.08         |               | 319.2        | 319.2 |
|    | 627          | NA           | 0             | 0            | NA           |               | 178.4        | 178.4 |
|    | 1650         | 894          | 0.04          | 0.04         | NA           |               | 224.6        | 89.2  |
|    | 394          | 1372         | 0.05          | 0.05         | NA           |               | 270.4        | 198.4 |
|    | 519          | 292          | 0.07          | NA           | NA           |               | 225.9        | 225.9 |
|    | 1650         | 1650         | 0.18          | 0.18         | 0.01         |               | 388.4        | 388.4 |
|    | 1650         | 1650         | 0.07          | 0.07         | 0.07         |               | 154.6        | 154.6 |
|    | 1650         | 1650         | 0.16          | 0.15         | 0.08         |               | 151.8        | NA    |
|    | 1650         | 1650         | 0.01          | 0.01         | NA           |               | 140.3        | 140.3 |

|    |      |        |      |      |      |       |       |
|----|------|--------|------|------|------|-------|-------|
|    | 91   | 150    | 0.03 | 0.03 | NA   | 208.9 | 145.7 |
|    | 471  | NA     | 0.01 | 0.01 | NA   | 196.2 | 196.2 |
|    | 1650 | NA     | 0.09 | 0.09 | NA   | 377.3 | 377.3 |
|    | 582  | 1650   | 0.43 | NA   | 0.43 | 390   | NA    |
|    | 1650 | 1650   | 0.07 | 0.07 | NA   | 347.6 | 156.6 |
|    | 395  | 455    | 0.04 | 0.04 | NA   | 210.6 | 160.5 |
|    | 984  | NA     | NA   | NA   | NA   | 263.9 | 263.9 |
|    | 1336 | 1650   | 0.01 | 0.01 | NA   | 203.4 | 203.4 |
|    | 279  | 376    | 0.01 | 0.01 | NA   | 219.4 | 183.6 |
|    | 467  | 842    | 9.1  | 9.1  | 0.8  | 126.1 | 126.1 |
|    | 812  | NA     | 0.03 | 0.03 | 0.03 | 117.7 | 117.7 |
|    | 109  | 96     | 1.74 | 1.74 | 0.39 | 13.5  | 12.3  |
|    | 1336 | 1041   | 2.19 | 0.24 | 0.05 | 375   | 375   |
|    | 642  | 755    | 0.01 | 0.01 | NA   | 186.5 | 108.8 |
|    | 1650 | 1378   | 0.01 | 0.01 | NA   | 309   | 218.3 |
|    | 540  | 825    | 0.09 | 0.08 | NA   | 389.8 | 207.5 |
|    | 524  | 415    | 0.06 | 0.02 | 0.06 | 339.3 | 292.2 |
|    | 1595 | 1306.7 | 0.01 | 0.01 | NA   | 424.3 | 424.3 |
| NA | NA   | NA     | 0.04 | 0.04 | NA   | 386.8 | 386.8 |
|    | 261  | 289    | 0.09 | 0.04 | 0.09 | 49    | 49    |
|    | 1650 | 1268   | 0.03 | 0.03 | NA   | 71.8  | 71.8  |
|    | 1425 | NA     | 2.72 | 2.72 | NA   | 223.9 | 223.9 |
|    | 1650 | 1650   | 0.04 | 0.04 | NA   | 227.4 | 166.1 |
|    | 1650 | NA     | 0.05 | 0.05 | NA   | 436.3 | 436.3 |
|    | 1650 | 1650   | 7.57 | 0.01 | 1.62 | 483.4 | 439.8 |
|    | 1650 | 1650   | 0.48 | 0.48 | 0.11 | NA    | 207   |
|    | 134  | NA     | 0.01 | 0.01 | NA   | 146.5 | 146.5 |
|    | 1650 | 1650   | 0.01 | 0.01 | NA   | 167.2 | 167.2 |
|    | 1650 | 1650   | 0.04 | 0.04 | NA   | 74.4  | 38    |
|    | 1650 | 1518   | 1.33 | 1.33 | NA   | 155.4 | 155.4 |
|    | 1650 | NA     | 0.06 | 0.06 | 0.04 | 292.7 | 292.7 |
|    | 1176 | 1650   | 0.01 | 0.01 | NA   | 404.2 | 404.2 |
|    | 585  | 704    | 0.01 | 0.01 | NA   | 315.9 | 203.1 |
|    | 673  | 724    | 0.2  | NA   | NA   | 156   | 156   |
|    | 601  | 1650   | 0.23 | 0.02 | 0.23 | 263.9 | 196.2 |
| NA |      | 1309   | 0.03 | NA   | 0.01 | 305.2 | NA    |
|    | 1650 | 838    | 0.33 | 0.33 | 0.31 | 500.8 | 344.9 |
|    | 319  | NA     | 3.12 | NA   | NA   | 167.9 | 167.9 |
|    | 889  | 635    | 0.01 | 0.01 | NA   | NA    | 79    |
|    | 436  | NA     | 0.11 | 0.11 | NA   | 313.3 | 313.3 |
| NA | NA   | NA     | 0.86 | 0.61 | NA   | 472.6 | 472.6 |
|    | 1650 | 1650   | 0.05 | 0.05 | 0.05 | 388.7 | 388.7 |
|    | 1098 | 1650   | 0.01 | 0.01 | NA   | 368.9 | 340.7 |

|    |      |      |      |      |      |       |       |
|----|------|------|------|------|------|-------|-------|
|    | 1612 | 1650 | 1.92 | 1.92 | 1.92 | 277.7 | 324.7 |
|    | 1650 | 1650 | 0.04 | 0.04 | NA   | 295.6 | 295.6 |
|    | 698  | NA   | 0.11 | 0.11 | 0.01 | 248.6 | 248.6 |
|    | 1636 | 1617 | 0.06 | 0.06 | NA   | 142   | NA    |
|    | 1650 | 1650 | 0.73 | 0.01 | 0.73 | 220.3 | 220.3 |
|    | 1135 | NA   | 1.1  | 1.1  | NA   | 420.6 | 420.6 |
|    | 660  | NA   | 0.04 | 0.04 | NA   | 109.4 | 109.4 |
|    | 1650 | NA   | 0.12 | 0.12 | NA   | 578.1 | 578   |
|    | 297  | 610  | 0.01 | 0.01 | NA   | 318.2 | 115   |
|    | 1309 | 770  | 0.21 | 0.21 | NA   | 28.4  | 28.4  |
| NA |      | 1650 | 0.01 | 0.01 | NA   | 260.6 | 62.3  |
|    | 1628 | 1650 | 0.5  | 0.5  | NA   | 246.4 | 197.6 |
|    | 1457 | NA   | NA   | NA   | NA   | 132.3 | 132.3 |
|    | 363  | 725  | 0.01 | 0.01 | NA   | 155.7 | 92    |
| NA | NA   | NA   | NA   | NA   | NA   | NA    | NA    |
|    | 1650 | 1650 | 0.06 | 0.06 | 0.03 | 224.5 | 191.7 |
|    | 1650 | 1650 | 0.29 | 0.29 | NA   | 368   | 368.2 |
|    | 955  | 1382 | 0.01 | 0.01 | NA   | NA    | 133.2 |
|    | 1650 | NA   | 0.11 | 0.11 | NA   | NA    | 159.4 |
|    | 1650 | NA   | 0.21 | 0.21 | NA   | 456.1 | 456.1 |
|    | 870  | 702  | 0.01 | 0.01 | NA   | 208   | 208   |
|    | 1650 | 1650 | 0.08 | 0.08 | NA   | 271.9 | 248.4 |
|    | 1650 | 1650 | 0.07 | 0.07 | 4.27 | 231.6 | 93    |
| NA |      | 409  | 0.05 | 0.05 | 0.02 | NA    | NA    |
|    | 322  | 816  | 0.99 | 0.99 | NA   | 260.8 | 260.8 |
|    | 1467 | 1650 | 0.14 | 0.14 | NA   | 219.7 | 219.7 |
|    | 838  | 878  | 0.01 | 0.01 | 0.04 | 251.7 | 136.9 |
|    | 1650 | NA   | 0.01 | 0.01 | NA   | 364   | 252   |
|    | 1650 | 1650 | 0.03 | 0.03 | NA   | NA    | 271.5 |
|    | 1236 | 649  | 0.01 | 0.01 | NA   | 233.4 | 233.4 |
|    | 804  | 739  | 0.08 | 0.08 | 0.06 | 87.6  | NA    |
|    | 399  | NA   | 0.01 | 0.01 | NA   | 141.1 | 141.1 |
|    | 1650 | NA   | 1.53 | 1.53 | NA   | 210.3 | 210.3 |
|    | 1650 | 1650 | 0.01 | 0.01 | 0.01 | 314.2 | 314.2 |
|    | 1650 | 1228 | 0.17 | 0.17 | NA   | 304.6 | 304.6 |
|    | 608  | 1650 | 6.38 | 6.38 | NA   | 290.6 | 290.6 |
|    | 889  | 635  | 0.01 | 0.01 | NA   | 79    | 79    |

|    | Admission..L | Admission..F | Admission..V | Cr.Day.of.Pla | Admission..I | Admission..L | Admission..F |
|----|--------------|--------------|--------------|---------------|--------------|--------------|--------------|
|    | 96.9         | 379.3        | NA           | NA            | 0.9          | 1            | 1.3          |
| NA | NA           | NA           | NA           | NA            | 0.9          | 0.6          | 0.6          |
|    | 18.5         | 288          | NA           | 0.7           | 1            | 0.5          | 0.6          |
|    | 33           | 122          | NA           | 0.9           | 1            | 0.8          | 1            |
|    | 66.9         | 66.9         | NA           | 1.3           | 1.3          | 1.2          | 2.5          |
|    | 18.2         | 227          | 36.5         | 1.6           | 1.7          | 1.2          | 1.9          |
| NA |              | 114          | NA           | 0.8           | 0.8          | 0.6          | 0.7          |
| NA | NA           | NA           |              | 0.6           | 0.6          | 0.4          | 0.5          |
|    | 34.2         | 196.7        | NA           | 0.8           | 1.2          | 1            | 1.2          |
|    | 149.5        | 149.5        | NA           | 0.8           | 1.1          | 1            | 1.7          |
|    | 8.9          | 60           | NA           | 0.8           | 0.9          | 0.5          | 0.7          |
|    | 71           | 238          | NA           | 0.7           | 1            | 0.6          | 0.8          |
|    | 52           | 301.9        | NA           | 0.7           | 0.7          | 1.7          | 8.6          |
| NA | NA           | NA           | NA           | NA            | NA           | NA           |              |
|    | 138          | 138          | NA           | 9             | 8.2          | 4.8          | 5.2          |
|    | 52           | 154          | NA           | 6.4           | 6.4          | 4.4          | 5.9          |
|    | 150          | 203          | NA           | 2.6           | 2.6          | 2.6          | 4.1          |
| NA | NA           | NA           |              | 0.4           | 0.4          | 0.4          | 0.6          |
|    | 127.7        | 127.7        | NA           | 1.1           | 1.1          | 1            | 1            |
|    | 311.7        | 392.8        | NA           | NA            | NA           | NA           |              |
|    | 7.6          | 7.6          | NA           | 0.9           | 1            | 0.8          | 0.9          |
|    | 57           | 154.4        | NA           | 7.5           | 7.5          | 6.3          | 9.7          |
| NA | NA           | NA           | NA           | NA            | NA           | NA           |              |
| NA | NA           | NA           |              | 3.9           | 4.1          | 3            | 4.7          |
| NA | NA           | NA           |              | 2.9           | 2.9          | NA           | NA           |
|    | 434.6        | 434.6        | NA           | 0.8           | 0.9          | 1.1          | 1.2          |
|    | 360.4        | 382.3        | NA           | 0.7           | 0.9          | 0.8          | 2.9          |
| NA | NA           | NA           |              | 3             | 3            | 2.6          | 2.9          |
|    | 231.6        | 231.6        | NA           | 1.5           | 1.5          | 1.8          | 1.8          |
|    | 200.2        | 275.3        | NA           | 0.5           | 0.7          | 0.5          | 0.6          |
|    | 45.3         | 89.3         | NA           | 1.1           | 1.3          | 0.8          | 0.9          |
| NA | NA           |              | 25.3         | 0.8           | 0.9          | 0.6          | 1.1          |
|    | 183.5        | 183.5        | NA           | 0.5           | 0.7          | 0.4          | 0.4          |
|    | 150.5        | 180.5        | NA           | 11.7          | 11.7         | 7.9          | 10.1         |
| NA | NA           | NA           |              | 0.9           | 1            | NA           | NA           |
|    | 164.2        | 224.6        | NA           | 1             | 1.4          | 0.8          | 1.7          |
|    | 206.7        | 270.4        | NA           | 1             | 0.5          | 0.5          | 0.8          |
| NA | NA           | NA           |              | 0.8           | 1.1          | 0.5          | 0.8          |
|    | 88.4         | 97.5         | NA           | 0.5           | 0.8          | 0.5          | 0.6          |
|    | 37.4         | 153.2        | NA           | 0.9           | 1            | 0.8          | 1            |
|    | 151.8        | 151.8        | NA           | 7.5           | 9.1          | 7.2          | 7.2          |
|    | 30           | 93.4         | NA           | 1.1           | 1.1          | 0.8          | 0.9          |



|    |       |       |    |    |     |      |     |      |
|----|-------|-------|----|----|-----|------|-----|------|
|    | 80.3  | 144.6 | NA |    | 0.7 | 0.7  | 0.5 | 0.6  |
| NA | NA    | NA    | NA |    | 0.7 | 0.8  | NA  | NA   |
|    | 240.3 | 240.3 | NA |    | 8.5 | 8.5  | 6.3 | 9.8  |
|    | 152   | 390   | NA |    | 0.5 | 0.4  | 0.5 | 0.7  |
|    | 103.4 | 347.6 | NA |    | 1.9 | 2.2  | 2.1 | 3    |
|    | 111.9 | 210.6 | NA |    | 0.5 | 0.8  | 0.5 | 1.8  |
| NA | NA    | NA    | NA |    | 3   | 3.7  | NA  | NA   |
|    | 60    | 144.1 | NA | NA |     | 0.8  | 0.6 | 0.7  |
|    | 100.3 | 219.4 | NA |    | 0.5 | 0.5  | 0.4 | 0.6  |
|    | 48.2  | 114.9 | NA |    | 0.8 | 1.1  | 0.4 | 0.9  |
| NA | NA    | NA    | NA |    | 0.6 | 0.7  | 0.6 | 0.7  |
|    | 13.5  | 13.5  | NA |    | 0.9 | 0.9  | 0.8 | 0.8  |
|    | 254.4 | 375   | NA |    | 0.9 | 1.7  | 0.9 | 3    |
|    | 7     | 186   | NA |    | 1.3 | 0.9  | 0.8 | 1    |
|    | 0.1   | 33.3  | NA |    | 0.4 | 0.6  | 0.4 | 0.5  |
|    | 265.4 | 389.8 | NA |    | 2.1 | 2.3  | 1.6 | 1.8  |
|    | 54.5  | 186.8 | NA |    | 0.8 | 1.9  | 0.9 | 1.4  |
|    | 3.7   | 24    | NA |    | 0.8 | 0.9  | 0.4 | 0.7  |
| NA | NA    | NA    | NA |    | 9.6 | 11.8 | 8.2 | 11.6 |
|    | 9     | 20.5  | NA |    | 1.1 | 1.1  | 0.8 | 1.1  |
|    | 0.5   | 3.1   | NA |    | 0.9 | 0.9  | 0.7 | 0.9  |
| NA | NA    | NA    | NA |    | 0.7 | 1    | 1.2 | 1.2  |
|    | 40.5  | 148.4 | NA |    | 0.5 | 0.9  | 0.4 | 0.6  |
| NA | NA    | NA    | NA |    | 2.9 | 2    | 3.6 | 5.8  |
|    | 460.8 | 483.4 | NA |    | 0.8 | 0.8  | 0.4 | 4.2  |
|    | 134.5 | 360.9 | NA |    | 0.7 | 1.4  | 0.7 | 7.8  |
|    | 117.2 | 117.2 | NA |    | 0.8 | 0.8  | 0.7 | 0.7  |
|    | 49.1  | 153.7 | NA |    | 5   | 7.6  | 4.2 | 5.8  |
|    | 29    | 74.4  | NA |    | 1.6 | 1.5  | 0.9 | 1.1  |
| NA | NA    | NA    | NA |    | 4   | 4.1  | 5.4 | 6.5  |
|    | 102.2 | 102.2 | NA |    | 0.9 | 1    | 0.6 | 1    |
|    | 85    | 276.2 | NA |    | 0.6 | 0.9  | 0.6 | 0.6  |
|    | 235.7 | 315.9 | NA | NA |     | 0.8  | 0.5 | 6.3  |
|    | 22.3  | 54.1  | NA | NA |     | 1.3  | 1.6 | 1.6  |
|    | 144.8 | 218.9 | NA |    | 0.5 | 0.6  | 0.4 | 1.5  |
|    | 96.3  | 96    | NA |    | 0.7 | 1    | 0.4 | 0.5  |
|    | 239.4 | 239.4 | NA |    | 1.4 | 1.4  | 1.1 | 1.5  |
|    | 50.7  | 50.7  | NA |    | 0.5 | 0.4  | 0.4 | 0.5  |
| NA | NA    | NA    | NA |    | 0.7 | 0.8  | 0.6 | 0.6  |
| NA | NA    | NA    | NA |    | 1.3 | 1.3  | 2.7 | 4.2  |
| NA | NA    | NA    | NA |    | 7.9 | 7.9  | 8.2 | 9.2  |
|    | 24.6  | 124.8 | NA |    | 1.2 | 1.2  | 0.7 | 1.3  |
|    | 72.9  | 392.8 | NA |    | 1   | 1    | 0.8 | 1.6  |

|    |       |       |    |     |     |     |     |
|----|-------|-------|----|-----|-----|-----|-----|
| NA | NA    | NA    |    | 0.8 | 0.9 | 0.6 | 1.1 |
|    | 213.3 | 213.3 | NA | 0.6 | 0.7 | 0.6 | 2.3 |
| NA | NA    | NA    |    | 4.2 | 4.6 | 2.3 | 4.2 |
|    | 142   | 142   | NA | 0.7 | 0.9 | 0.6 | 0.6 |
|    | 88.4  | 201.4 | NA | 2.9 | 1.7 | 3.5 | 6.5 |
| NA | NA    | NA    |    | 0.7 | 0.8 | 1.2 | 7.5 |
| NA | NA    | NA    | NA |     | 1.4 | 0.9 | 0.9 |
| NA | NA    | NA    |    | 0.7 | 1.2 | 0.6 | 2   |
|    | 87.7  | 318   | NA | 0.8 | 0.9 | 0.5 | 0.9 |
|    | 5.4   | 9.9   | NA | 1.2 | 1.5 | 1   | 1.1 |
|    | 77.9  | 260.6 | NA | 0.4 | 0.6 | 0.2 | 0.5 |
|    | 246.4 | 246.4 | NA | 3.6 | 9.5 | 2   | 5.8 |
| NA | NA    | NA    |    | 3.7 | 3.7 | 5.1 | 9.1 |
|    | 48.7  | 155.7 | NA | 1.3 | 1.3 | 0.8 | 1   |
| NA | NA    | NA    | NA | NA  | NA  | NA  |     |
|    | 185   | 224.5 | NA | 0.6 | 0.9 | 0.7 | 0.8 |
|    | 235.3 | 235.3 | NA | 3.9 | 3.9 | 2.7 | 4.8 |
|    | 149.3 | 349.8 | NA | 0.8 | 0.9 | 0.7 | 0.7 |
| NA | NA    | NA    |    | 2.4 | 2.3 | 2.2 | 2.6 |
| NA | NA    | NA    |    | 3.4 | 3.4 | 5.5 | 8   |
|    | 83.5  | 83.5  | NA | 0.8 | 0.9 | 0.9 | 1   |
| NA | NA    | NA    |    | 6.8 | 6.8 | 1.7 | 6.6 |
|    | 42.3  | 231.6 | NA | 0.8 | 0.8 | 0.6 | 0.8 |
| NA | NA    | NA    | NA |     | 0.6 | 0.3 | 0.5 |
|    | 9     | 154.3 | NA | 0.6 | 0.6 | 0.4 | 0.6 |
|    | 63.4  | 65.8  | NA | 5.5 | 5.6 | 3.8 | 5.9 |
|    | 251.7 | 251.7 | NA | 0.7 | 0.6 | 1   | 6.4 |
| NA | NA    | NA    |    | 5.5 | 5.5 | NA  | NA  |
|    | 392.7 | NA    | NA | 6.7 | 6.8 | 5.1 | 6.9 |
|    | 16.9  | 16.9  | NA | 0.4 | 0.5 | 0.3 | 0.4 |
|    | 87.6  | NA    | NA | 7.1 | 6.2 | 5.3 | 8.6 |
| NA | NA    | NA    |    | 1   | 1.1 | 0.9 | 0.9 |
| NA | NA    | NA    |    | 2.4 | 2.5 | NA  | NA  |
|    | 120.5 | 224.8 | NA | 1.4 | 1.5 | 1.3 | 1.7 |
|    | 21.8  | 21.8  | NA | 0.8 | 1.3 | 0.7 | 0.8 |
|    | 42.6  | 83.5  | NA | 5.2 | 4.4 | 5   | 6.9 |
| NA | NA    | NA    |    | 0.7 | 0.8 | 0.6 | 0.6 |

Admission..L Admission..Highest.Value.of.Cr.Post.Plasma.Administration..8.14.days.

|    |     |     |
|----|-----|-----|
|    | 1   | 3.4 |
| NA | NA  |     |
|    | 0.4 | 0.6 |
|    | 0.8 | 1   |
| NA | NA  |     |
|    | 1   | 1.4 |
| NA | NA  |     |
|    | 0.3 | 0.4 |
|    | 0.7 | 1.7 |
| NA | NA  |     |
|    | 0.4 | 0.7 |
|    | 0.6 | 0.8 |
|    | 4.8 | 8.6 |
| NA | NA  |     |
| NA | NA  |     |
|    | 3.1 | 5.2 |
| NA | NA  |     |
|    | 0.5 | 2.4 |
| NA | NA  |     |
|    | 1   | 1.7 |
|    | 0.8 | 1   |
|    | 2.6 | 7.5 |
| NA | NA  |     |
|    | 3.1 | 4.5 |
| NA | NA  |     |
| NA | NA  |     |
|    | 2.2 | 7   |
|    | 2   | 2.4 |
| NA | NA  |     |
|    | 0.7 | 0.9 |
| NA | NA  |     |
| NA | NA  |     |
| NA | NA  |     |
|    | 2.2 | 8.5 |
| NA | NA  |     |
| NA | NA  |     |
|    | 0.5 | 1.5 |
|    | 0.5 | 0.8 |
|    | 0.3 | 0.5 |
|    | 0.7 | 0.8 |
| NA | NA  |     |
| NA | NA  |     |

|    |      |     |
|----|------|-----|
|    | 0.5  | 0.7 |
| NA | NA   |     |
|    | 10.4 | 6.4 |
|    | 0.7  | 1.8 |
|    | 2    | 2.5 |
| NA | NA   |     |
| NA | NA   |     |
|    | 0.6  | 0.6 |
| NA | NA   |     |
|    | 0.7  | 1   |
| NA | NA   |     |
| NA | NA   |     |
| NA | NA   |     |
|    | 0.9  | 1.1 |
|    | 0.4  | 0.6 |
| NA | NA   |     |
|    | 0.6  | 1.9 |
|    | 0.5  | 0.6 |
| NA | NA   |     |
| NA | NA   |     |
| NA | NA   |     |
| NA | NA   |     |
|    | 0.4  | 0.7 |
| NA | NA   |     |
|    | 3.2  | 5.9 |
|    | 4.4  | 8   |
| NA | NA   |     |
|    | 2.7  | 4.4 |
|    | 1    | 1   |
| NA | NA   |     |
|    | 0.6  | 0.8 |
| NA | NA   |     |
|    | 5.1  | 7   |
| NA | NA   |     |
|    | 0.9  | 1.7 |
|    | 0.3  | 0.6 |
|    | 0.6  | 0.9 |
| NA | NA   |     |
| NA | NA   |     |
| NA | NA   |     |
| NA | NA   |     |
|    | 3    | 5.9 |
|    | 0.7  | 1.3 |

|    |     |     |
|----|-----|-----|
|    | 0.3 | 0.8 |
| NA | NA  |     |
|    | 1.6 | 2.1 |
| NA | NA  |     |
|    | 3.7 | 8.4 |
| NA | NA  |     |
| NA | NA  |     |
|    | 2.3 | 2.6 |
|    | 0.6 | 0.8 |
| NA | NA  |     |
|    | 0.1 | 0.5 |
| NA | NA  |     |
| NA | NA  |     |
|    | 0.8 | 1.1 |
| NA | NA  |     |
|    | 0.8 | 0.9 |
|    | 2.1 | 2.8 |
|    | 0.6 | 6.2 |
| NA | NA  |     |
| NA | NA  |     |
| NA | NA  |     |
| NA | NA  |     |
| NA | NA  |     |
| NA | NA  |     |
|    | 0.4 | 0.6 |
|    | 3   | 5.1 |
| NA | NA  |     |
| NA | NA  |     |
|    | 0.7 | 8.2 |
| NA | NA  |     |
|    | 3.8 | 4.7 |
| NA | NA  |     |
| NA | NA  |     |
|    | 3.4 | 7.6 |
| NA | NA  |     |
|    | 6.1 | 8.8 |
| NA | NA  |     |
